# Supplementary material for: Rupture of deep faults in the 2008 Wenchuan earthquake and uplift of the Longmen Shan
Source: Springer Nature journal article supplement (doi:10.1038/ngeo1210), 2011-07-31
Supplement: 41561_2011_BFngeo1210_MOESM184_ESM.pdf [file 41561_2011_BFngeo1210_MOESM184_ESM.pdf]

# Rupture of deep faults in the 2008 Wenchuan earthquake and uplift of the Longmen Shan

## Supplementary Information

### (I) Ground-based geodetic measurements

Field measurements were made by crews from the Institute of Seismology, China Earthquake Administration (CEA), Sichuan Earthquake Administration, Second Crustal Deformation Monitoring Center, CEA, Yunnan Earthquake Administration, and Sichuan Bureau of Surveying and Mapping. Field observations began 3 days after the mainshock, and resurveyed sites are categorized into three geodetic networks. The first network consisted of 120 Crustal Movement Observation Network of China (CMONOC)<sup>S1-S3</sup>, and 5 additional sites resurveyed by Institute of Geology, CEA. These sites were surveyed 4-5 times in the years 1999-2007. The re-measurement of this network was undertaken under the direction of Earthquake Monitoring and Prediction Division, CEA, and was completed within the first 50 days after the mainshock. These high-quality pre-earthquake data provided secular site velocities with uncertainties better than 1.5 mm/yr, which precisely define the interseismic deformation over eastern Tibet and the Sichuan basin<sup>S3</sup>. The second network comprises 200 sites that were installed initially as geodetic control points in 2007-2008. This network was surveyed only once before the earthquake by the Sichuan Bureau of Surveying and Mapping and geodetic coordinates of the GPS sites determined to better than 8 mm in the WGS-84 system. Because of the low deformation rates and short time interval prior to the earthquake, no correction for interseismic motion is required for these sites. Reoccupation of these sites and 10 others first surveyed by the Shaanxi Bureau of Surveying and Mapping was accomplished primarily in 50 days after the mainshock by Institute of Seismology, China University of Geosciences Wuhan, Sichuan Earthquake Administration, Wuhan University, and the Sichuan Bureau of Surveying and Mapping. All sites of

the first two networks provided high precision three-dimensional (3D) coseismic displacements.

The third network mixes 52 triangulation sites and 42 leveling points close to the surface break. The triangulation sites were surveyed by State Bureau of Surveying and Mapping in 1960-1970s. The triangulation geodetic coordinates (horizontal only) were derived from a nationwide net adjustment<sup>S4</sup> and provided in the 1980 Xi'an Reference System<sup>S5</sup>. Six triangulation sites lined along the front of the Longmen Shan (DD02, W131, W136, W244, G278, DJ02), as a part the local GPS network (Fig. S1), were resurveyed with GPS prior to the earthquake. With the 6 common sites observed with both GPS and triangulation before the earthquake, we transformed all triangulation sites in the epicentral region into the International Terrestrial Reference Frame (ITRF) system, using a 7-parameter Helmert transformation. Pre-earthquake elevations relative to the geoid were available from either trigonometrical or spirit levelling, and these were taken as the best approximations of the height above the ellipsoid for use in the coordinate transformation. We did not use the vertical positions otherwise. The postfit residuals of these sites amount to 5-8 cm for horizontal components, slightly better than the previous precision assessment of these geodetic coordinates. The post-earthquake surveys were completed nearly one year after the mainshock by Wuhan University, Institute of Seismology and Sichuan Earthquake Administration. 12 of the 52 sites surveyed were found to have been reinstalled and thus unusable for displacements, or the marker was occupied wrongly due to misleading secondary marks nearby. The remaining 33 sites (for the 6 common sites, we used the GPS pre-earthquake survey) exhibited a reasonable displacement signal relative to their uncertainties.

The 42 leveling sites with a typical benchmark spacing of 5-10 km are distributed along a total of 300 km-long sections of the first-order leveling network<sup>S6</sup>. The leveling lines from Mianzhu to Pingwu and from Maoxian to Beichuan were initially surveyed in 1983 and 1997 respectively, following the Chinese spirit levelling standards, associated with random errors that grow with the square root of the distance traversed as  $k\sqrt{L}$  mm, where  $k = 0.7$  (L in km)<sup>S7</sup>. In addition, a known systematic height-dependent error is present in these data that is usually not in excess of  $1 \times 10^{-6}$  of the height above the starting site of a leveling line in km<sup>S8</sup>. As a result, systematic errors for sites in the Longmen Shan should be no more than 2 cm

given a relative height of 2000 m above the Sichuan Basin. The re-survey by spirit-leveling was made in September 2008 along the Pingwu-Mianzhu section and May 2009 along the Maoxian-Beichuan jointly by the First and Second Crustal Deformation Monitoring Centers, CEA following the same standard<sup>S6</sup>.

## **(II) GPS data analysis**

Surface displacement vectors and interseismic regional velocity field were derived from a reduction of both continuously tracking and campaign survey data by using the Jet Propulsion Laboratory (JPL) GIPSY-OASIS (version GOA4) software<sup>S9</sup>. The processing takes advantage of a continuously operating GPS (cGPS) array of 32 permanent stations within a radius of 500 km away from the epicenter and about 35-40 cGPS station outside (Fig. S1). Data from each day were processed separately to obtain loosely constrained daily network solutions. The data analysis used the JPL non-fiducial orbit and clock solutions (<ftp://sideshow.jpl.nasa.gov>) and IGS (International GNSS Service) antenna center model IGS\_01.pcv (<ftp://igscb.jpl.nasa.gov>). We used the Precise Point Positioning (PPP) methodology only for data scanning to remove outliers and find discontinuities in the carrier phase<sup>S10</sup>, and in the final solution we adopted network mode strategy, including ambiguity resolution for the entire daily network<sup>S10</sup>. This resulted in a set of independent daily self-consistent loosely constrained network solutions. The daily GPS solutions were combined with daily global IGS sites solutions (SINEX) submitted by JPL to IGS, and we then transformed the combined solution into the ITRF05<sup>S11</sup> using about 15 global reference sites (variable day to day) to define the 7 parameter Helmert transformation. We determined the regional velocity field by integrating a decade-long GPS campaign data (1997-2007) with a weighted least squares adjustment, then transformed velocities into an Eurasia plate-fixed reference frame using a pole of rotation determined previously by us (0.2523°/Ma, 56.96 N, 104.36E)<sup>S12</sup>.

## **(III) Surface displacement by ground-based geodesy**

We determined three-component surface displacements from all GPS sites (Fig. S2). But triangulation measurements provide only horizontal displacements, while leveling measures solely vertical motion. We used three different methods to

estimate displacements at GPS and triangulation sites due to the earthquake. For permanent continuously tracking sites we averaged the 5 days prior to and 5 days following the earthquake and estimated displacements from these merged solutions. The pre- and post-earthquake solutions were mapped onto the ITRF05, using a subset of 14 well-determined IGS global reference stations that are not affected by episodic jumps in the time series. Coseismic displacements of the stations in the epicentral area were derived from coordinate differences between the pre- and post-earthquake solutions with a typical uncertainty of 2-3 mm. These cGPS stations provided instantaneous static offsets, ranging from the maximum of  $127 \pm 1$  cm at Pixian, the nearest at  $\sim 25$  km to the epicenter, to 3-9 mm at distal stations in Chongqing, Hubei, and Shaanxi Provinces. The campaign sites were treated in a slightly different way to remove the effects of interseismic deformation. For campaign sites with multiple-epoch observations prior to the earthquake, the coseismic displacements were estimated by fitting a linear trend and offset at the time of the earthquake. For sites with either one-epoch pre-earthquake GPS measurement or triangulation data before the earthquake, we took the difference between the pre-earthquake and post-earthquake positions and corrected interseismic deformation according to prediction by the regional crustal deformation model constrained by GPS measurements, except for surveys done within a few months before the earthquake.

The displacements at triangulation sites were calculated from differences between ITRF-aligned coordinates converted from the Chinese geodetic system and the post-earthquake GPS survey in ITRF05. The geodetic coordinates are available from the national data archive, to our regret, without information about the exact dates when the terrestrial data were acquired; fortunately, the interseismic correction is small due to slow interseismic deformation across the Longmen Shan<sup>S13</sup>. If we assume an epoch of 1966, the mean value of the earliest possible epoch 1958 when the field work was initiated in Sichuan and the latest epoch 1974 when the fieldwork ended, relative interseismic displacements due to tectonic loading are less than 2 cm at the worst case, much smaller than the coordinate errors associated with system transformation and terrestrial observations. Thus we ignored such corrections. We retained the horizontal components but excluded the vertical components because of differences between the elevation datum applied for the Chinese geodetic system

and the ITRF system.

The vertical displacements relative to a fixed station at Pingwu are derived from changes in height differences between two contiguous leveling sites observed during a time span containing the earthquake (Fig. S2). The inferred displacements with an uncertainty less than 3 cm are corrected given secular uplift at rates of (1-2)  $\pm$  (1-3) mm/y in the eastern boundary of the Tibet Plateau, inferred from another first-order spirit leveling route across the Longmen Shan from Chengdu via Guanxian, Wenchuan and Lixian to Barkam measured respectively in 1977 and 1994.

The dates of post-earthquake surveys varied, with most of the surveys being completed within two month of the earthquake. Inevitably the coseismic displacement field contains up to the first two months of postseismic deformation, and the triangulation data close to the surface rupture contains about 1 year of postseismic deformation. Shen *et al.* (2009)<sup>S13</sup> estimated this contribution to be generally no larger than a few cm or a few percent of the coseismic displacements for the cGPS sites where such estimates can be made. Thus the postseismic deformation for the imprecise triangulation may be ignored with respect to its coseismic signal. We do not attempt to correct for postseismic effects on the GPS sites, but address potential implications in the discussion and interpretation of the results.

The complete dataset consists of 473 GPS sites with 3-dimensional (3D) displacements with a typical uncertainty of <1 cm, 33 triangulation sites with horizontal components with <10 cm uncertainties, of which 158 GPS sites previously published<sup>14</sup>. If combining with additional 12 GPS sites and 42 sites with only vertical displacements collected by another group<sup>S6, S15</sup>, a total of 560 ground-based data are available for determination of surface displacement field associated with the 2008 earthquake, to our knowledge, being the most comprehensive set of geodetic data dedicated for any large earthquake. For comparison, 232 GPS vectors<sup>S16</sup> are available for the 2002 Denali ( $M_w$  7.9) earthquake, 142 GPS vectors for the 1999 Chi-Chi ( $M_w$  7.6) earthquake<sup>S17</sup>, and 142 GPS vectors and 19 vertical displacements for the 2004 Sumatra-Andaman ( $M_w$  9.2) earthquake<sup>S18, S19</sup>. One triangulation site (YBSH, Hongkou) in the hanging wall is found to move eastward  $\sim$ 5.5 m, the maximum recorded for this event. Horizontal displacements in the Sichuan Basin

and Songpan-Ganzi point obliquely to the surface trace, consistent with the reverse-and strike-slip mechanism. Whereas the displacements in both regions are characterized by a relatively simple pattern, the displacements in the Longmen Shan exhibit complex features. For example, surface displacements in Wenchuan and Lixian are directed towards the epicentre, suggesting a dominating thrust-motion rupture on the southwest half of the rupture. This mode of deformation gives way progressively to an anticlockwise rotation in Pingwu, Songpan and Qingchuan, indicating a considerable strike-slip component on the northwest half.

The vertical displacements are localized in a narrow zone close to the rupture and decay rapidly away from it (Fig. S2), and show a characteristic pattern: one region of systematic subsidence in the footwall and another region of uplift in the hanging wall, on which a levelling site at the town of Beichuan documented the largest throws of 4.7 m. The levelling data delineate a pivot line separating the areas of uplift and subsidence in the hanging wall alongside the northeast third of the rupture but no pivot line is clearly defined in other areas, implying a rupture width that varies along the strike.

#### **(IV) InSAR data analysis**

We used 8 tracks of radar image obtained by the phased-array-type L-band SAR (PALSAR) of the Advanced Land Observing Satellite (ALOS) launched by the Japanese Aerospace Exploration Agency (JAXA). The ALOS radar images have provided a nearly complete coverage over ground deformation in the epicentral area<sup>S20, S21</sup>. The overlapping SAR images were acquired from the ascending tracks 470-477 (Fig. S3), and each cover an approximately 70 km wide swath. The raw PALSAR images for this study are same as those selected by Shen *et al.* (2009)<sup>S13</sup>. For mitigating ionospheric effects, Feng *et al.* (2010)<sup>S22</sup> adopted a catalogue of PALSAR images, in which nearly half of images are different from ours. We did not try to process Envisat images and did not incorporate ScanSAR mode images in the ALOS descending tracks either<sup>S23</sup>. Our data processing strategy was mostly the same as that of the previous studies<sup>S13, S22, S23</sup>.

We processed the radar images using the ROI\_PAC software developed at JPL<sup>S24</sup> with satellite orbits provided by JAXA. Interferograms were down-sampled using a multi-look operation (4 looks in range and 20 looks in azimuth). A weighted power spectrum technique<sup>S25</sup> was applied to filter the fringes to produce the wrapped interferograms (Fig. S3), each with a centre scene incidence angle of 34.3° and an azimuth of N12.8°W. As others previously reported, some interferograms suffered severely from troposphere and ionosphere disturbances over the epicentral areas<sup>S13, S22, S23</sup>. Although the errors in the line-of-sight (LOS) range changes due to tropospheric effects alone are relatively small (<5 cm) compared to the deformation caused by an M~8 earthquake, 10-20 cm biases in the InSAR interferograms resulted from the combined effects of tropospheric and ionospheric disturbances still pose serious challenges to this study<sup>S26</sup>. To our knowledge, so far, no method has successfully removed these effects from the interferograms, given the lack of sufficient information about the regional troposphere and ionosphere during the times of data acquisition<sup>S13, S22- S23</sup>.

We did not perform sub-pixel matching to estimate surface displacement in both the range and azimuth directions. In the previous studies both the azimuth and range offset data sets are able to help identify the fault locations but were not used for modeling because their uncertainties were too large to constrain the source model<sup>S20</sup>. The SNAPHU (Statistical-cost, Network-flow Algorithm for Phase Unwrapping) software developed by the Stanford University<sup>S27</sup> was used in phase unwrapping to avoid discontinuous fringes since the interferograms generated by the typical unwrapping method of ROI\_PAC will be gapped by longer surface rupture. The unwrapped interferograms were geocoded to a geographic coordinate system and then converted to LOS range changes.

For a removal of topographic phase from the interferograms, we used a 3 arc-second (90 m) digital elevation model from the Shuttle Radar Topography Mission (SRTM)<sup>S28</sup>. To minimize orbital effects, we adjusted the interferometric baseline for each pair of repeat-pass SAR images. However, given that the post-earthquake phase contains a deformation signal even in the far field, the baseline re-adjustment would be biased without a priori information about the deformation field, which we

obtained by approximating the GPS-inferred surface displacements with a 2-order polynomial. This was estimated by least squares for each specific ALOS swath with the GPS data around it.

The interferograms show almost no phase coherence in an elongated belt 20-30 km wide containing the surface rupture owing to distorted landscape and rugged terrain. Phase unwrapping errors are more likely in areas of very poor coherence. Aside from the near-source region, coherence is excellent. These InSAR measurements show only a single component of the three-dimensional displacement field. Thus we projected the three components of the GPS displacements to the LOS direction and compared the LOS-directed GPS displacements to the InSAR range-offset measurements along several profiles normal to the surface rupture (Fig. S2). These profiles show that the two data sets are in good agreement at a level of 3-4 cm on the Sichuan Basin and 6-8 cm on the Longmen Shan, although they reveal the extent to which the InSAR data fails to capture the near fault deformation. Furthermore, the InSAR interferograms do not (visually) unveil the rotation of the displacement field that is evident in the GPS displacements. Because the LOS range changes are oblique to the rupture, the InSAR interferograms contain information about both the strike-slip and thrust-motion components of the slip distribution. Obviously one-direction LOS range changes available to us do not uniquely describe three-dimensional components of ground motion associated with this event.

## **(V) Fault geometry**

We explored a wider range of possible fault geometries than was reported in previous geodetic studies. Although previous studies indicated that the surface rupture consists of twelve or more distinctive segments<sup>S13</sup>, we adopted a relatively simple 3-segment fault geometry in which the main ruptures along the BCF and PGF were considered, neglecting a secondary rupture along the Xiaoyudong fault (Fig. S4). We restricted our attention to the first-order characteristics of rupture plane, since the surface static offsets around the rupture zone are largely insensitive to minor details in fault geometry<sup>S22</sup>. We treated the 360-km-long BCF as the Yingxiu (YX, 210 km) and Qingchuan (QC, 150 km) segments, consistent with



variations of strike on the northeast section. The décollement at depth connects with ramp fault that emerges as the BCF at the surface, to form two curved surfaces, 150-km along strike by 42 km downdip for the QC segment, and 210 km by 90 km for the YX (Fig. S4). Different downdip widths are consistent with along-strike variation in faulting mechanism<sup>S29</sup>. The aftershock distribution characterized by a salient lobe on the southwest half, suggests that a far-reaching décollement of the YX segment was involved in the rupture during the earthquake. A shorter downdip extension of décollement for the QC segment reduces computation burden as well. The intersection between the YX and YX segments is somewhat arbitrary in the our model, but coincides with the projection of the NS-oriented Huya fault (Fig. S4). Across this fault and its southward extension, the regional topography exhibits sharp contrasts and the northeast part of the Longmen Shan is characterized by a gentler gradient while the southwest part boasts elevated mountains with peak elevation up to ~6,000 m. The abrupt change in dip angle occurs at the intersection in our fault model. For the PGF, we used a single rectangular plane of 180 km in length by 21 km in width.

The surface locations of the model follow the mapped surface breaks<sup>S30</sup> but we ignored some irregular changes in surface trace and adopted straight line approximations. In doing so, spatial mismatches between the mapped and model surface locations are usually less than 1 km, but at Chaping, as large as 5 km. We were guided as well by the outline of aftershock sequences where no surface trace was reported. The PGF is assumed to have a fixed dip angle of 35° based on geological cross-sections<sup>S3</sup> and mainshock fault plane solutions, assuming that slip on it was propagated straight from the hypocenter to the surface at the range front (Fig. S4). The adopted dip is quite consistent with the mainshock moment tensor solutions (Global GMT <http://www.globalcmt.org>) as well. Slip on the PGF has a minor contribution to the coseismic displacement field and to the GCMT solution, there is no good reason to expect that its dip angle could be constrained robustly by the present data. We thus adopted a simple treatment. Dip angles of the YX and QC segments are hypothesized to decrease with depth in the cross section (Fig. S4), corresponding to a smooth ramp-décollement similar to structural sections<sup>S30-S32</sup>. This is approximated by discretizing the model surface into numerous parallel elements along-strike that is further divided into tens of sub-fault elements (Fig.

S4b). The discretized ‘cylindrical’ geometry is delineated by three parameters: the dip angle of a ramp at the surface  $\delta_s$ , the depth of downdip limit of the ramp — a hinge of ramp-décollement fault  $h_b$  (Fig. S4c) and the dip angle of the décollement from the downdip limit  $\delta_d$ . In general, the ramp fault represents a steep surface whose dip angle decreases rapidly with depth above  $h_b$ , while the décollement has a dip angle that reduces gently. A gradual decrease in dip ( $1^\circ$  per element) of the décollement (10-25 deep elements) to horizontal is imposed.

We used a grid search to determine the optimal model parameters respectively for the YX and QC segments. The model spaces are set to  $45^\circ < \delta_s < 75^\circ$ ,  $0^\circ < \delta_d < 15^\circ$ , and  $10 \text{ km} < h_b < 30 \text{ km}$  in terms of regional tectonics and seismicity. A group of models, with  $0^\circ < \delta_d < 10^\circ$  and  $10 \text{ km} < h_b < 20 \text{ km}$  are examples of thin-skinned tectonics. The end-member models with  $h_b = 30 \text{ km}$  represent the thick-skinned tectonics limit (Fig. S5). For each pair of geometric parameters, we constructed  $\sim 100$  optional models from the fault space, leaving the rest at reasonable values, and used plots of the misfit as a function of these parameters to assess parameter trade-offs (Fig. S4c). We used the GPS data alone to constrain the fault geometry.

The optimal fault model is determined in terms of global misfits to the GPS data and model slip roughness<sup>S33</sup> on a given fault geometry. In the optimal model geometry, the ramp of the BCF dips to northwest at  $55^\circ$  along the YX segment and steepens to  $70^\circ$  along the QC segment down to 16 km depth, rooting into a sub-horizontal décollement at depths of 15-22 km. We note that the surface dip of the QC segment is weakly constrained by our data, and larger variation in the dip is allowed. The surface dip for the YX segment and the depth of its downdip limit are constrained quite robustly. The deep-seated décollement of our fault model is coincident with a transition zone, imaged by seismic tomography between the upper crust and ductile mid-lower crust<sup>34</sup>, into which small earthquakes before 2008 and the aftershocks of 2008 are observed to cease suddenly from above<sup>S35, S36</sup>. The preferred fault geometry when combined with subsurface structure under the Sichuan basin lend support to the idea that convergent deformation across the eastern margin of the Tibetan Plateau is accommodated by a thinned-skin structure similar to what is inferred under the Taiwan orogeny and the Himalayas arc<sup>S37, S38</sup>, and crustal shortening above a shallow-dipping décollement has uplifted the Longmen Shan.

## (VI) Slip inversion with combined dataset

We divided the optimal model fault into 2,061 rectangular subfaults with dimensions of either  $4 \times 3 \text{ km}^2$  for the ramps or  $4 \times 4 \text{ km}^2$  for the décollement (Fig. S4). The QC segment consists of 546 patches (42 along strike by 13 downdip), the YX segment 1,200 sub-fault patches ( $48 \times 25$ ) and the PGF 315 patches ( $45 \times 7$ ). Slip on each subfault patch is estimated using the bounded least squares algorithm BVLS<sup>S39</sup>, which minimizes misfits to surface displacements subject to weighted constraints on the roughness of the slip distribution.

$$\begin{aligned} & \text{Misfit} \quad \text{Roughness} \\ & \|W(Gs - d)\|^2 + \beta^2 \|Ls\|^2 = \min \\ & 0 \leq s \leq B \end{aligned}$$

Here  $\mathbf{G}$  is the matrix of Green functions calculated using Okada's formula<sup>S40</sup>,  $\mathbf{d}$  represents surface displacements including 3 component vectors by GPS, horizontal vectors from triangulation/GPS observations, vertical uplift or subsidence by spirit levelling or InSAR LOS range offsets.  $\mathbf{W}$  defines the weight matrix, or inverse of the covariance matrix  $\Sigma$  of GPS displacements and LOS range changes,  $\Sigma^{-1} = \mathbf{W}^T \mathbf{W}$ . The vector  $\mathbf{s}$  denotes slip vectors to be estimated, including strike-slip and dip-slip components,  $\mathbf{B}$  is the slip bound value,  $\mathbf{L}$  is the Laplacian (smoothing) operator, and  $\beta$  is the smoothing factor with a unit of 1 subfault/m or  $12 \sim 16 \text{ km}^2/\text{m}$  (for  $3 \times 4 \text{ km}^2$  or  $4 \times 4 \text{ km}^2$  subfault patch).

We explored a class of solutions with the ground-based data (GPS, triangulation and levelling) and 3,600 InSAR range changes subsampled from 8 InSAR interferograms. In a joint inversion with InSAR and ground-based data, we solved for slip components and additional nuisance parameters related to the InSAR data: 1) a bilinear ramp for each interferogram to correct for possible orbital errors, and (2) two phase constants per interferogram (one for each side of the fault, except the easternmost (Track 470). Subsampling is done based on a grid of about 8 km in spacing and each sample represents the mean-value of 460-540 range changes

within each grid. We took into account the variation in LOS direction of the samples within a track for each InSAR sample we used.

The InSAR samples are distributed uniformly over the tracks including the sparse data in the destruction zone. We also considered an alternate sampling method<sup>S41</sup>, using a quad-tree algorithm (MATLAB function **qtdecomp**), which provides denser samples to the fault and sparser ones far away from it (Fig S6a). The choice of sampling method made very little difference in the estimated slip distribution (Fig S6b). As discussed later, removal of all the InSAR data has very little impact on the estimated model except on the décollement, because of the large number and spatial density of GPS measurements, so this is no surprise. We present here the results from uniform sampling, because the many time-consuming resolution and other tests used that version of the InSAR data. The uniform sampling here is a reasonable approach for the thrusting earthquake with data mostly far away from surface rupture<sup>S41, S42</sup>.

We restricted slip to right-lateral strike-slip motion and updip slip in hanging wall accord with geological measurements. The inversion was carried out using software written for MATLAB versions, which were used for a number of past earthquakes<sup>S43-S45</sup>. The inversion was done on PC/Linux DELL and IBM workstations with 9-12 hours per run.

## **(VII) Data weighting**

Proper weighting of data is important in all inversion problems. In this case, where we combine data from multiple independent data sets, we must assess both correlated errors within a given data set, and the relative weighting between data sets. The inverse of the resulting data covariance matrix is used as the weight matrix in the inversion. We used a covariance matrix that was largely diagonal, following the common practice<sup>S13, S43</sup>.

GPS positions contain correlated errors due both to geometric effects (reflected in the formal covariance matrix) and systematic errors due to errors in observation models (atmospheric delays, orbits, reference frame), and thus displacements are

theoretically correlated from site to site. It is important to remember, however, that these effects are at the mm to few mm level at most, and except for far field sites are small compared both to the displacements and the typical residuals. Furthermore, when the pre- and post-earthquake surveys are spread out over many days, the systematic errors are effectively independent from site to site. Because of these factors, we included correlated errors between horizontal components of the displacement vector of a GPS site, but neglected the correlation between sites. We increased the uncertainty of the GPS displacements by a factor of about three from their formal errors to compensate for neglected errors and limitations in the deformation models. We determined the weight of each triangulation and leveling measurement from its formal uncertainty. We treated all the InSAR subsamples as independent observables with a uniform weight determined by the prescribed uncertainty ( $1/\sigma^2$ ) irrespective of spatial distribution, noise level and image decorrelation. We assigned 40 mm as the uncertainty of InSAR data and adjust this weight relative to the GPS data, a value derived directly from their postfit RMS, which is compatible with what previous studies have used. For examples, Shen *et al.* (2009)<sup>S13</sup> and Feng *et al.* (2010)<sup>S22</sup> set the ALOS data to be 50 mm and 45 mm, respectively. We did not attempt a more sophisticated assessment of the correlated errors in the InSAR data, given that removal of all InSAR data did not change the shallow slip distribution significantly (see later section).

As Shen *et al.* (2009)<sup>S13</sup> discussed about the joint inversion of GPS and InSAR data for the Wenchuan earthquake, it is still be resolved how to adjust the optimal weighting between the GPS and the InSAR data<sup>S13, S22, S46</sup>. We tested a range of there weighting factors from 1 to 15 in a series of model tests to change the relative weight of the InSAR data. The results do show some changes in distribution of slip, as Shen *et al.* (2009)<sup>S13</sup> found, but the first-order features remain essentially the same. The InSAR data in the joint inversion represent a minor part (<10 %) of the overall misfit if no reweighting is applied (reweighting factor set to 1). In the final joint inversion, we assigned 4 for the reweighting factor. Both Shen *et al.* (2009)<sup>S13</sup> and Feng *et al.* (2010)<sup>S22</sup> applied a weighting scheme to GPS data based on either distances of the GPS sites from the surface rupture, or the amplitudes of GPS vectors. In the former scheme<sup>S22</sup>, the far-field observations contribute to the slip model slightly less than the near-field data, while in the latter scheme, to the

contrary, the near-field data have less weight than the far-field data, resulting in a more smoothed spatial variations in fault slip. In contrast, we weighted the GPS data based only on the scaled formal error. For comparison, we tested Shen *et al.*'s scheme<sup>S13</sup> with our dataset. According to this scheme, the ground-based data in the near field with displacements ranging from 25 cm to 6 m are downweighted by a factor of two to four relative to the far-field data in range of 10-20 mm. The first-order features, such as the geometries and sizes of the asperities on the ramp and décollement were largely unchanged.

### **(VIII) Optimal smoothing and slip bound**

Using the same BVLS inversion, we tested a range of upper slip bounds in which the upper bounds were increased to see if the bounds were important. Finally, we put upper bounds of 10 m of slip in both components for the BCF, and 5 m of slip for the PGF after a series of model tests, in which we systematically changed upper bounds from as low as 5 m to as large as 15 m and used an (Non-Negative Least Squares) NNLS-like case with an upper bound much larger than any possible slip. The preferred upper bound has achieved a minimum weighted residual sum of squares (WRSS) and is within the limits suggested by reported surface ruptures (Fig. S7a.)

These tests showed the data misfit increased significantly if the maximum slip bound was set to less than 7-8 m, but the data are not fit better by allowing slip values in excess of 10 m per component (at the smoothing weight of the preferred model). In the NNLS-like case (Figs. S8-S10), the shallowest slips of models with less smoothing increased to as much as 18 m for some patches. Not all shallow slip patches increased to very large slip amounts (see the checkerboard tests – some shallow areas are much better resolved than others because there are data nearby). Only massively smoothed NNLS models reduced the maximum peak slips to 6-9 m at the surface for poorly resolved patches, but as in the BVLS case models with that much smoothing fit the data poorly overall. Our conclusions are that the data are not satisfied by models with shallow slip limited to the geologic values, there were most likely slip patches on the fault with ~10 m of slip, and shallow slip is not well resolved on all parts of the fault.

In order to make the under-determined problem stable, smoothing constraints that apply discrete Laplacian smoothing between subfaults are introduced. Large variations in slip on individual subfaults can result from increasing or decreasing the weight given to smoothing. An acceptable smoothing yields a compromise between fit to the data and slip smoothness. We considered a class of smoothing factors in a range from 2 to 2048 ( $\text{km}^2/\text{m}$ ), and the derived misfit vs. roughness trade-off curve is shown in Fig. S7b. A smoothing weight of  $32 \text{ km}^2/\text{m}$  is preferred, although the models estimated within  $\beta=16\text{-}256 \text{ km}^2/\text{m}$  are all very similar (Figs. S8-S10). However much stronger smoothing ( $>512 \text{ km}^2/\text{m}$ ) will merge isolated asperities into larger ones (Fig. S10). Models that are substantially more smooth than our preferred model show significantly higher misfits to the near-field GPS sites (Fig. S11b), but similar misfits to far-field sites; overall misfits increase to 3-4 times larger than the misfits of the preferred model to the data before the main features of the slip distribution begin to change and distinct asperities in the preferred model merge together in the smoother models (Figs. S10). Models with much less smoothing show much more short wavelength variation in slip (Figs. S8), but the same basic features remain. Our preferred smoothing weight is broadly consistent with those imposed on past slip models based mostly on the GPS data<sup>S43, S44</sup>, and an InSAR-based model<sup>S48</sup> but lower than that imposed on some models based entirely on the InSAR data<sup>S49- S51</sup>. In our inversion, we noticed that the fit to the InSAR data is less sensitive than the fit to the GPS data as model smoothness is varied.

### **(IX) Model misfit and postfit residuals**

Fig. 2 shows the horizontal coseismic displacements and our best-fitting model predictions. The postfit residuals of surface displacements are shown in Fig. S6. The root-mean-squares (RMS) misfit for the GPS data is 2.2 cm, indicating a very good overall fit to both the near-field and far-field data. The postfit residual errors in the Sichuan Basin are systematically smaller than those in the Longmen Shan. Large postfit residuals (0.52 m at maximum) close to the fault may reflect localized inelastic deformation, postseismic relaxation, or slip variations smoothed out in our model. Some misfits to the GPS data in the Songpan-Ganzi, although not very large

(but consistently larger than their uncertainties, Fig. S11a), may be associated with 3D structural variations, or possibly the effects of postseismic deformation. We note that the largest postfit residual (~45 cm) in all GPS sites corresponds to a site near the town of Yingxiu. At this site, the post-earthquake survey was postponed to September 2008 due to a road blocked by landslides after the mainshock. Thus, the larger residual errors might be related to postseismic deformation. If we ignore one GPS site with the largest postfit residual error, the RMS misfit of the GPS data only is 1.6 cm. The RMS misfit is 12.2 cm for the triangulation data, slightly larger than the specified uncertainty.

A total of 168 InSAR samples (<5 % of the total) with postfit residuals in excess of 11.8 cm (a half wavelength of L-band SAR) in the initial inversion were excluded as outliers from the final inversion. Most of the outliers are in the destruction zone, within 20 km the surface break, where coherence is poor and phase unwrapping errors are more likely to occur. Previous studies appear to have masked out data in this region<sup>S13</sup>. Including or excluding these data makes only a small difference in the resulting slip model, but does impact the RMS errors for the InSAR data. The InSAR data yield a global postfit RMS of 4.3 cm.

Residuals for the triangulation sites are slightly larger than expected based on the assumed errors. In detail, triangulation sites in the footwall show postfit residuals of 5-10 cm whereas sites in the hanging wall feature an average postfit residual greater than 15 cm. The resurvey of triangulation sites were undertaken in the early half of 2009, almost one year since the mainshock, thus the postfit residuals, especially at sites located on the hanging wall, definitely include postseismic displacements. For example, 2 sites closest to surface breaks at Hongkou and Chaping, respectively, have 30-40 cm of postfit residuals, in excess of their uncertainties by a factor of 2-3, implying some postseismic effects. Nevertheless, the postfit RMS for these sites is 12 cm, comparable with the uncertainty of coordinate suggested by a network adjustment integrating terrestrial and space geodetic measurements on a nationwide scale<sup>S4</sup>.

#### **(X) Slip uncertainty and model resolution**



To estimate the slip uncertainty, we constructed 900 sets of synthetic data that were subsequently inverted. Each set consisted of realistic displacements perturbed by ‘realistic’ noise, which we define as noise with the characteristics of the noise in the data (we used the data covariance to generate the noise) <sup>S49</sup>. With 900 solutions for the distribution of slip, we estimate the RMS value of model slip for each patch on a patch-by-patch basis as a measure of the slip uncertainty  $\sigma$ .

$$\sigma = \sqrt{\frac{\sum_{i=1}^n (\bar{s}_i - s)^2}{n}}$$

$n$  is the number of models we inverted from the perturbed data. Vector  $\mathbf{s}$  is the optimal model slip and  $\bar{s}_i$  are slip estimates of the  $i$ -th model ( $i=1,2, \dots, 900$ ). From our calculation, the largest uncertainty in slip magnitude of each subfault is less than 0.4 m. Furthermore the distribution of slip uncertainty is not correlated spatially with the distribution of slip (Fig. S12).

Checkerboard resolution tests were performed on a series of synthetic earthquakes that rupture fault with uniform slip patches set to 0 or 3 to 8 m, corresponding to a seismic moment comparable to the Wenchuan earthquake. We define the resolution as the following formula:

$$R_i = \left(1 - \frac{\bar{s}_i \sum_{i=1}^n s_i}{s_i \sum_{i=1}^n \bar{s}_i}\right) \times 100$$

Here,  $R_i$  represents the resolution for the  $i$ -th asperity (a matrix of subfaults) on a model plane with  $n$  asperities each corresponding to a uniform slip  $s_i$ .  $\bar{s}_i$  is the retrieved slip on this asperity, a value averaged over slip estimates with either the same area or an expanded area with surrounding patches included.

The checkerboard tests suggest that the data do not resolve an asperity of 3×3 subfault matrix or less (Fig. S13), but has an average resolution of > 67% to retrieve an asperity of 4×4 subfault matrix with >3 m of slip on the ramp (Fig. S14). For an asperity of 5×5 subfault matrix on the décollement, the data have an average resolution of >85% to retrieve >3 m of slip. This means that the main asperities we placed on the ramp and décollement are robust features, as their estimated sizes exceed 4×4 subfault matrix. Furthermore, we tested the resolution using a single

asperity of 3×3 subfault matrix, and summed all slip found on a concentric 5×5 subfault matrix centered on the asperity, to test how much of the slip in poorly resolved areas is simply spread out by smoothing. In this case the resolution for >3 m of slip on a 3×3 subfault matrix anywhere on the fault is greater than 90%. Thus, we are confident that any slip concentration of this size will be retrieved in the model, although variations in shape of asperities smaller than this resolution limit may be missed.

In assessment of model slip accuracy, we calculated the RMS error of the retrieved slip using a formula:

$$\sigma = \sqrt{\frac{\sum_{i=1}^n \{(\bar{s}_i^s - s_i^s)^2 + (\bar{s}_i^t - s_i^t)^2\}}{2n}}$$

Here, superscript *s* and *t* represent strike- and thrust-slip components respectively.

We show in Figs. S13-S15 that the accuracies of slip components are in a range of 1.3-2.2 m for the models tested. In general, large RMS values are related to small asperities in size but with larger slip. For comparison, we show the average standard deviation of retrieved slip of each model, which ranges from 0.6 m to 1.0 m. These statistics are all larger than the uncertainty (up to 0.4 m) given by using the bootstrap algorithm, implying that it may represent merely formal error propagated by the noise of surface displacements, therefore underestimating somehow the real error of slip inverted from the geodetic data.

We also used the model resolution matrix to estimate the linear dimension of resolution on the rupture plane. Here the resolution matrix is defined as<sup>S52</sup>

$$R = (G^T \Sigma^{-1} G + \beta^2 L^T L)^{-1} G^T \Sigma^{-1} G$$

If  $(r_1, r_2, \dots, r_n)$  is a vector of the diagonal terms of resolution matrix, where *n* is the number of subfault patch,  $r_i$  ( $i = 1, 2, \dots, n$ ) between 0 and 1 indicate the extent to which the slip on a patch is averaged with others on the neighboring patches. If all patches are perfectly resolved,  $r_i$  ( $i = 1, 2, \dots, n$ ) equals to 1 leaving all off-diagonal terms equal to 0. In general, the corresponding diagonal terms are less than 1 and many off-diagonal terms are non-zero. The values of *r* are plotted in Fig. S12. Given a subfault patch area of 4×4 km<sup>2</sup>, the linear dimension of resolution  $\rho$  for

the  $i$ -th subfault patch is defined as<sup>S49</sup>

$$\rho = \frac{4}{\sqrt{r_i}} \text{ (km)}$$

In general, the resolution degrades steadily with depth on the ramp faults (Figs. S17-S18), characterized by good resolution at the surface ( $\rho < 10$  km) and poor resolution on the décollement ( $\rho > 15$ -20 km). These computed resolution distances corroborate the inferences from the checkerboard test but can better quantify spatial variations in resolution.

### (XI) Slip models inverted from different datasets

By omitting some parts of the data, we can gain more insights into the model's sensitivity to the data. We compare the solution using all data to three solutions obtained from inverting (1) only ground-based data including GPS, triangulation, leveling, (2) only GPS, (3) only far-field GPS data (Fig. S18).

The first two models (Fig. S18a-b) share most of the main features of the final slip model (Fig. 2). The model constrained by only far-field data (~50 km away from the BCF) places only three slip patches on the shallow part of fault plane, and fails to distinguish slip between the BCF and PGF due to poor resolution. The distinct asperities of our optimal model merge into a smaller number of asperities, leading to some significant differences in inferred slip locations. This model resembles some of the earlier published models, which used data sets with less near-field data. Nevertheless this model also places the majority of slip in the uppermost 7 km of crust; high slip near the surface is not a feature dominated by the near-source data but required by all data.

Postseismic effects, which are presumably largest for triangulation sites due to the delayed resurvey, do not change the main features, in comparison with the model inverted from the GPS alone. We conclude that while postseismic deformation can yield an increase in total geodetic moment, it does not change the spatial pattern of slip on the fault plane. However, inclusion of the triangulation data substantially improves the details in the model. More distinct asperities are found in the model with the triangulation data, and slip maximization near the surface is more

pronounced. Furthermore, the slip partitioning between the PGF and BCF is well constrained only in this model.

Compared to the preferred slip model constrained by the combined data, the model with only the ground-based data shows little or no change in slips on the ramps, although there are differences in slip on the décollement. In general, if the InSAR data are down-weighted according to their level of noise, they provide merely a weak constraint on the slip distribution compared to the ground-based data. The exception to this is for slip on the décollement, where the InSAR range changes substantially improve the model resolution for slip, because there are relatively few GPS sites over this region.

For a comparison with the preferred fault geometry, we tried to solve for the distribution of slip on the steeply faulting geometry with dip angle  $>45^\circ$ . The so-called thick-skinned structure<sup>S53, S54</sup> consists of a high angle reverse fault that emerges as the BCF with the  $55^\circ$  and  $70^\circ$  dip angles respectively for the YX and QC segments at the surface, in accordance with our preferred fault geometry at the shallow depth. The dip angle of the QC segment is reduced gradually to  $38^\circ$  at a depth of 45 km. The PGF in this fault model has  $35^\circ$  constant dip angles same as the fault in the preferred fault model. With the same BVLS inversion and all geodetic data, the WRSS for the resulting slip distribution on such a dipping fault geometry is 29,300, almost twice the WRSS (=14,562) for the our preferred slip model, although the shallow parts of both slip patterns look very similar (Fig. S19a). The thick-skinned slip model yields a geodetic moment of  $8.73 \times 10^{20}$  Nm, equivalent to an  $M_w 7.93$  earthquake. We conclude that slip on the thick-skinned structure was unlikely for the Wenchuan earthquake.

We tried to incorporate the geological surface offsets compiled by different groups<sup>S29, S54, S55</sup> into the geodetic data to constrain the distribution slip (Fig. S19b), using the approach adopted by Elliott *et al.* (2007)<sup>S43</sup> for the 2002 Denali earthquake. Because most of the geologic offsets at a given locality show scatter greatly exceeding the reported uncertainties<sup>S56</sup>, we assigned uncertainties to the surface offsets of half of their amplitudes or mean values if multiple measurements at a given location are available. The slip model constrained by the mix of data places peak slip at depths between 3-9 km, exhibiting a significant updip tapering in slip.

But this model fits the near-source geodetic data very poorly, the WRSS increases by ~100% compared to our preferred model. A worse postfit to the data suggests that the geologic data are not compatible with the geodetic data, although the upper envelope of the geologic offsets is much more compatible with the geodetic data than the mean geologic offsets. This agrees with the previous studies<sup>S43</sup>, and may result from significant off-fault deformation and complexity of the rupture at shallow depths<sup>S57, S58</sup>, which makes it difficult to account for all surface offsets. Thus we did not include the geologic offsets as a direct constraint imposed in the final inversion.

We also estimated slip using a layered elastic medium in order to compare it with our preferred model based on a uniform elastic. This inversion takes the same form as that in an half space inversion, but the Green functions that relate a finite planar dislocation embedded in horizontally layered half-space to surface displacements were calculated with the use of the software PSGRN/PSCMP<sup>S59</sup> and structure parameters from CRUST-2, the latest global model of Earth's crust<sup>S60</sup>. The base of the crust in this rheological model is assumed to be 41 km in depth. This estimate is justified for the Sichuan Basin, but definitely shallower than depths of 50-60 km beneath east Tibet that has been inferred from the recent seismic tomography and receiver function imaging<sup>S61, S62</sup>. The layered half-space model provides a global postfit to the data same as, but slightly worse than, that based on the uniform half-space model, and the main features of the slip model do not change significantly. The larger misfit might indicate that the CRUST-2 model is not adequate for the region, and further work with other layered (or 3D) models might improve the fit.

In comparison with the uniform half-space model, slip on the deep part of the ramp is systematically larger, but the slip on the shallow part of the BCF and on the décollement remains largely unchanged. The area of 10 m slip extends downdip to 16 km in depth on the Hongkou asperity, and to 12 km on the Qingping. Slip at this magnitude in the uniform model is usually confined to the uppermost crust shallower than 5-6 km. Slip on the deep part of the PGF increases appreciably, but slip on the shallow part shrinks in size considerably, and the magnitude of slip is reduced to as low as 2-3 m on the Mianzhu asperity (Fig. 3), less than the surface slips found there<sup>S29</sup>. Overall, the distribution of slip in the layered half space is quite smoother compared to the model based on a uniform half space. The shallow slip

gap at Xiaoyudong found in the uniform model disappears in the layered model. Nevertheless, the peak slips of this model remain in the shallow part of the BCF. Larger slip at depths of 8-17 km is required in the layered model to account for the far-field data, which results in a larger moment (equivalent to an  $M_w=8.03$  earthquake) than in the uniform model.

## **(XII) Comparison between different slip models**

Since the break of the 2008 Wenchuan earthquake, concerns have been focused on the understanding of rupture behavior, which is anticipated to shed light on how strain energy was accumulated and released, and to help assess the potential seismic risks on the active faults in the adjacent regions<sup>S63, S64</sup>. So far there are a dozen of slip models available<sup>S13, S22, S23, S46, S65- S75</sup>. The models are categorized to two sorts. One group of models were inverted from seismic waveforms recorded at the GSN stations, providing the quickest service to the community in hazard assessment and mitigation. These seismological models<sup>S65- S70</sup> were significantly different from each another in slip pattern with very rough resolution, suffering from strong space-time tradeoffs in distribution of slip. Another group<sup>S13, S22, S23, S46, S71- S75</sup> were constructed with geodetic constraints from the space-borne InSAR measurements and/or ground-based GPS surveys. Of the geodetic models, the joint inversion of InSAR and GPS data provided the best model resolution. We select three representatives of these models, Shen *et al.* (2009)<sup>S13</sup> and Feng *et al.* (2010)<sup>S22</sup> and Tong *et al.* (2010)<sup>S23</sup> for a comparison with our result.

Our dataset of surface displacement is a superset of the data used by the models of Shen *et al.* (2009)<sup>S13</sup>, Feng *et al.* (2010)<sup>S22</sup> and Tong *et al.* (2010)<sup>S23</sup>, which used up to 158 GPS displacement vectors<sup>S14</sup>. We included these data but processed them independently using different software. Furthermore, our dataset increases the number of the sites by a factor of three, including in particular much more near-source data. The previous models used different representations of fault geometry, however all included a shallowly dipping décollement, although they found that most slip occurred on the steeply dipping ramp. We employed a fault geometry that approximates a cylindrical surface in the final inversion, although we considered a wider range of possible fault geometries than were reported in those papers.

Overall features of these models (e.g. total moment, locations of the two largest slip patches) are very similar. However, the slip models are quite different in detail, and in general, the previous models are much smoother than ours. The predictions of our model are very similar to that of Shen *et al.* (2009)<sup>S13</sup> in the far-field region, but their model did a poor job of predicting our new near-fault data. For example, the RMS misfit of their model to 122 near-field sites amounts to 32 cm, far higher than for our model. Overall, their model appeared to be too oversmooth to account for the near-source GPS data.

Three of the asperities evident in our model are not very clear in Shen *et al.* (2009)<sup>S13</sup>. In particular, our model finds two distinct asperities at Beichuan and Qingping, and two asperities on the décollement, while their model found only a single asperity at Beichuan and no deep coseismic slip on their detachment fault. The estimated positions of the asperities are slightly different from ours.

The distribution of slip given by Feng *et al.* (2010)<sup>S22</sup> is similar to that of Shen *et al.* (2009)<sup>S13</sup> in locating high-slip patches. The latter is much smoother than the former. The differences between them are that Feng *et al.* (2010)<sup>S22</sup> found more asperities on the shallower part of the fault planes due primarily to different InSAR data and fault geometry — Feng *et al.* (2010)<sup>S22</sup> used a slightly different InSAR data in order to reduce ionospheric effect in ALOS InDAR fringes at the expense of introducing a slight larger postseismic deformation signals. In addition, Feng *et al.* (2010)<sup>S22</sup> also applied an additional weighting according to distances of the GPS sites to the fault. All together, such a strategy in data inversion may result partly in a shallower thrust-slip on the southern limit of the Beichuan fault. Nevertheless, Feng *et al.* (2010)<sup>S22</sup> found no slip at a fault junction near Chaping where 1958 M6.2 earthquake occurred, totally different from what Shen *et al.* (2009)<sup>S13</sup> suggested. In addition, Feng *et al.* (2010)<sup>S22</sup> and Tong *et al.* (2010)<sup>S23</sup> found moderate slip patches on the PGF as our model suggests.

Shen *et al.* (2009)<sup>S13</sup> placed almost homogeneous slip on the PGF mostly resulted from strong smoothing. Tong *et al.* (2010)<sup>S23</sup> constrained the slip distribution with the conventional ALOS InSAR, GPS and geological data, and additional ScanSAR interferograms in the ALOS descending tracks. Their model placed most of the moment release confined to the upper part of the crust shallower than 10 km depth,

and did not identify any deep slip. In general, their model suffered low resolution so that Tong *et al.* (2010)<sup>S23</sup> did not show slip maximization near to surface because “*the shallowest part of the rupture is not well constrained due to de-correlation on the hanging wall near the fault*”. As they stated further: “*Resolving the slip partitioning between the parallel fault strands (note: BCF and PGF) is difficult given their proximity and the fact that the interferograms are completely de-correlated in the near field, presumably due to extreme ground shaking and high strain. The estimated slip on the Pengguan fault is less robust due to the ambiguity in this slip partitioning*”

### **(XIII) Some notes on our slip model**

The refined distribution of slip uncovers interesting features masked by smoother slip models. Whereas almost all slip models identified one asperity at Hongkou, our result demonstrate two asperities: a moderate-slip region near Yingxiu and large-slip region at Hongkou, separated by a low slip gap of 3-6 km at depth, a place that projects upward to the Zipingpu Reservoir impounded two years before the earthquake by the dam across the Min River (Fig. 3). It is noted that a similar gap between the Hongkou and Caopo asperities (Fig. 3) correlates well with the Min River at the surface.

The low-slip on these parts of the fault may be associated with a de-stressed zone characterized by the weak frictional strength due to elevated pore pressure prompted by water infiltration from the river. The background seismicity (1992-2008)<sup>S36</sup> is relatively high underneath the Zipingpu Reservoir (Fig. 3c) and a fraction of small earthquakes (M3-4) were confined to depths shallower than 10 km (Fig. 3c). It is likely that the accumulated strain in the interseismic period is released largely through diffuse failures either aseismic slip or small earthquakes, because a fluid-saturated fault favors, although does not require, stable slip<sup>S76</sup>. The impoundment of the reservoir by the newly built dam may have changed the stress state on the weak section of the fault and hastened earthquake by changing the pore pressure. Although the effective Coulomb stress change is not very large ( $< 0.5$  bar)<sup>S77</sup>, it may be sufficient to bring to such a critical zone closer to failure.



The 2008 event nucleated (30.986°N, 103.364°E, 15.5 km)<sup>S68</sup> on the bottom edge of the Yingxiu asperity at which the initial slip was quite small, probably no more than 2 m, but rose abruptly to a 13 m of high-slip at Hongkou, the first large sub-event (equivalent to an  $M_w=7.42$  event with about 40 km of rupture in length, see Tab.1). An empirical relationship has been suggested between the mainshock moment and characteristics of the first few seconds of P-wave arrivals — the level of rupture energy at the initiation stage determines the ultimate size of the earthquake<sup>S78</sup>, corresponding to a pre-slip model<sup>S79</sup> as opposed to a cascade model<sup>S80</sup>. The similar relationship inferred from analysis of local seismic recordings of the Wenchuan earthquake and its aftershocks<sup>S81</sup> suggests a mainshock scalar moment equivalent to an  $M_w=7.45$  event, very close to the size of the first main sub-event of the Wenchuan rupture. In fact, slip did not stop at the end of this first asperity making an  $M_w=7.4$  earthquake, but instead bifurcated at Xiaoyudong, propagating along the PGF as well as continuing on the BCF.

The first large asperity (Hongkou) at shallow depth is characterized by thrust faulting in its southern part that abruptly changes over a short distance to oblique-slip motion in its northern part. The second large shallow asperity (Qingping), is separated from the first by a gap of very low slip of 16 km-wide at all depths. This asperity features a mixture of deeper thrust motion and shallower oblique slip. The third (Beichuan) is separated completely from the second by a similar 8-12 km-wide gap and also displays consistently oblique slip. The fourth (Nanba) is distinct from the Beichuan at depth but could be continuous near the surface. North of the Beichuan, slip becomes progressively closer to strike slip farther to the northeast, although a thrust component persists.

The remaining large asperity is located on the PGF. Slip is always dip-slip faulting on the PGF, with a minor component of strike-slip motion locally. The slip is confined to mostly the shallow part of the PGF (<8-9 km in depth), and does not extend downward to join with the BCF. This together with a minor moment release suggests that the rupture on the PGF was seismically and is not continuous with the rupture on the BCF.

This behaviour, with a sequence of comparably sized failures on contiguous but distinct segments of a fault, thus represents a clear case of the cascade model. This

suggests that the pre-slip model characterized by hypothetical scaling law of rupture energy-magnitude may have an application to single asperity ruptures, but faces a fundamental limitation in trying to predict the size of earthquakes that rupture multiple large asperities. In these complex, large events, the ultimate size of the earthquake depends on the stress state of asperities a long distance from the hypocenter<sup>S80</sup>.

We also note that the rupture branched out at Nanba from the Beichuan fault, and continued to propagate subsurface for 40-60 km from what is presumed the surface extremity of the rupture near the town of Qingchuan. In our model, slip on the Qingchuan asperity reflected an unsuccessful jump over the fault offset of 10-20 km between the Qingchuan and Beichuan fault<sup>S29</sup>, because mostly it did not breach the surface, and the slip at depth was arrested eventually in Shazhou, half way from Qingchuan (Sichuan) to Ningqiang (Shanxi). Obviously the fault offset impeded a further propagation to the northeast, leaving major aftershocks  $M > 5$  clustered nearby (Fig. 3a).

At both endpoints of this rupture, deep slip did not correspond to slip at shallow depth, which resulted in strain energy accumulated on 20-40 km long sections largely untapped. At the southwestern end, the 1970 Dayi  $M6.2$  earthquake de-stressed a fault segment to the south may have impeded a southward extension of the 2008 rupture (Fig.2a). At the northern end, no historic earthquake larger than  $M > 6$  was documented. It is possible that these slip gaps may be ultimately ruptured by large deep earthquakes ( $M > 7$ ) in the long term as the 2008 event did, but is also plausible that the residual slip-deficit on the seismic gaps be smoothed out by moderate shallow earthquakes ( $M6-7$ ) in the future at approximately the same locality.

#### **(XIV) Implication of slip maximization near to the surface**

We note that slip shallower than 5 km in depth is systematically larger than deeper than 5-6 km, and most of the shallow asperities have their maximum slip in the top 2-3 km of the Earth's crust. This feature of the slip distribution remains even with more smoothing, or with further averaging of the model based on the estimated

resolution. The slip maximization so close to the surface is rare if any occurred, for past thrust earthquakes. So far, only the 1999  $M_w=7.6$  Chi-Chi, Taiwan earthquake showed a similar feature on the north end of rupture<sup>S82</sup>. Although the 2007 Solomon Island earthquake ( $M_w=8.2$ ) earthquake unambiguously demonstrated the same slip pattern<sup>S83, S84</sup>, unfortunately on subduction zones it was inherently difficult to distinguish coseismic slip from afterslip near the trench due to a lack of offshore data<sup>S85</sup>, underscoring that large continental thrust events are especially important for understanding this aspect of thrust-type earthquake behaviour.

Elastic boundary-element models for a convergent deformation zone predict that strain stored in response to a non-uniform creeping on the basal fault that links with a locked ramp fault above, when released quasi-statically at the end of an earthquake cycle, results in slip attaining its maximum in the deep part that is reduced gradually to lower values at shallow depths<sup>S86</sup>. Based on a similar boundary element model of strain build-up along the preferred fault geometry, the observed slip on the BCF shallower than 7-8 km in depth is 3-7 m greater than the model frictionless slip while they are elsewhere comparable in magnitude (Fig. S21a). Obviously the peak slip being confined to the very shallow part of the fault highlights a slip surplus at shallow depth. The observation requires either coseismic slip containing local effects such as dynamic overshoot, or more straightforwardly extra strain in addition to the accumulated in one seismic cycle.

In the former assumption, if the shallow slip surplus were driven by dynamic waves from the deep section of a fault, the dynamic overshoot would result in a total slip 60-100% larger than the quasi-static slip induced by ambient stresses. Although numerical experiments show that dynamic overshoot could trigger extra slip on a low-angle reverse fault<sup>S87</sup>, such a rupture relies on weak frictional conditions, and would predict an unconventional pattern of aftershocks<sup>S88</sup>. In the 2008 Wenchuan earthquake, we were not aware of exceptional normal and right-lateral faulting after-shocks<sup>S89</sup>, which would be consistent with the state of stress on the fault if a

complete dynamic overshoot prevailed. In the latter assumption, the shallow slip excess is merely manifestation of non-uniform strain accumulation left over from previous cycles, with elastic energy in the shallow crust quite larger than at greater depths. There are two plausible mechanisms for build-up of a large shallow strain reservoir. One is that the BCF, like the San Jacinto fault in southern California<sup>S90</sup>, had been undergoing ‘deep creep’ at a depth range of 9-16 km. This process of strain release between successive earthquakes is characterized by aseismic creeping that is usually accompanied by intensified seismicity of small to moderate magnitude in the lower section of the brittle crust, resulting in a thinned seismogenic layer of the crust. As a result, the maximum slip in a large earthquake would be concentrated in shallow parts without corresponding larger slip at greater depths. However, the large asperities with the considerable amount of slip extended to ~16 km depth in 2008 apparently are at odds with the ‘deep creep’ hypothesis. Moreover, the seismic slip rate of <0.05mm/yr, inferred from a four-decade catalogue of regional seismicity (Fig. S22) is too low to indicate a sensible creeping at these depths under the Longmen Shan.

Another possibility is that past large events ( $M \sim 7$ ) nucleated at depth but did not break to the surface, leaving elastic strain in the shallow part essentially intact for multiple cycles. The resulting strain reservoir is eventually expended in a larger earthquake that ruptures all way to the surface with the maximum slip near the surface. The historical record of major earthquakes along the Longmen Shan is too short in time to shed a clue to such earthquake behaviour. However, the seismicity of large earthquakes at the Himalaya and surroundings with similar neotectonic settings<sup>S37</sup> probably provide a good analogue to it. Three large Himalayan earthquakes ( $M_w$  7.8-8.1) in the last century left no surface expression<sup>S91</sup>, but a great medieval earthquake ( $M_w > 8.6$ ) in the Nepal Himalayas did breach the surface with an unusual ( $>20$  m) large slip<sup>S92</sup>, almost double the estimate given a fault slip rate at 20 mm/yr over a typical recurrence interval of 500 years<sup>S86, S92</sup>.

The 2008 event implied that elastic strain at shallow depth, if unconsumed during the major earthquakes, could persist until released in subsequent earthquakes for two reasons—high strength fault and competent ambient rock, otherwise the residual slip deficit left over by the previous earthquake would be smoothed out completely by afterslip, interseismic creeping or diffused inelastic failures following each event<sup>S93</sup>. A relatively high frictional strength associated with a slip rate as low as ~1 mm/yr on a high-angle thrust<sup>S13</sup>, is required to support the most abrupt topography in the range front, and may restrain aseismic creeping or intense smaller earthquakes as well. Less than 10% of the relocated earthquakes of the recent 15 years<sup>S36</sup> occurred in the uppermost 5 km of the crust, consistent with this inference. The Paleozoic massif or Precambrian metamorphosed crystalline basement in the upper brittle-ductile zone<sup>S53, S94</sup>, also can ‘freeze in’ the elastic deformation originated from major earthquakes at depth over a longer time scale<sup>S95</sup>, inhibiting diffused inelastic failures (e.g. folding). Such a seismogenic fault may be capable of generating infrequent great earthquakes with a prolonged recurrence interval, during which several smaller-magnitude events may fill parts of the larger rupture and recur several times, shedding light on the bimodal pattern of seismicity on convergent plate boundaries along the Himalaya, Sumatra, and the circum-Pacific seismic belts<sup>S86, S96, S97</sup>.

The effect of a complete release of cumulative strain energy and corresponding slip maximization near the surface on the growth of a 2008-type event is two-fold. First, the non-uniformly distributed strain in the shallow part of a fault could facilitate rupture propagation across structure irregularities<sup>S98, S99</sup>. Second, the slip maximization reflects a sharper gradient at its updip edge that may promote rupture to nucleate on the adjacent fault<sup>S100</sup>. Our findings suggest that the maximum earthquake magnitude on a given megathrust depends largely on whether or not it has attained a critical strain close to the surface so that the rupture can cascade through multiple segments, rather than factors such as the velocity and age of a descending

plate at subduction zones<sup>S101</sup> or a strain reservoir associated with elevated mountains alongside<sup>S37, S86</sup>, and last but not least, has nothing to do with the slip rate and dip angle of a continental thrust system<sup>S94</sup>. Our study implies that the 2008 Wenchuan earthquake, nearly one of the maximums on the Longmen Shan thrust, is unlikely a characteristic rupture<sup>S94</sup>. A recurrence interval of four thousand years was inferred from a time-predictable model<sup>S13</sup>, but this may neglect the possibility that the characteristic earthquakes of smaller-magnitude on individual segments may coincide occasionally to generate jointly a rare event that ruptures multiple segments. Because these smaller events are still capable of producing considerable damage, a simplistic model that assumed the 2008 event was characteristic may significantly underestimate the seismic hazard.

#### **(XV) Elastic boundary element models**

We emulated the 1-D slip pattern along a profile across the Yingxiu segment, where we found significant deep slip on the décollement of the BCF, using the 3DDEF code<sup>S102</sup>. Our forward model takes the form of those described by Feldl and Bilham (2006)<sup>S86</sup>, who suggested that great earthquakes on a convergent plateau margin are driven in part through draining the strain reservoir of plateau. Our boundary element model includes a non-uniformly creeping detachment fault that is embedded sub-horizontally at depths 15-22 km and two steeply dipping ramps that are locked in a 15 km-thick seismogenic layer and emerge at the western front of the Sichuan Basin as the BCF and PGF at the surface, corresponding to a 420 km along strike by 630 km down-dip interface between the basement of the Sichuan basin and the overlying Longmen Shan and Songpan-Ganzi terrane. This cylindrical geometry is based on the fault plane inferred from the geodetic inversion of surface displacements of the Wenchuan earthquake (Fig. S20b). We divided the free creeping décollement into 19 parallel slipping elements, each with 60 sub-elements along the length (Fig. S20). Two ramp faults (200 km and 90 km along strike) are defined by 8×40 and 8×15 subfault matrixes that are locked interseismically, and then subjected to a sudden slip that propagates upward on the BCF and the PGF. In total, the boundary element model has 1582 subfaults embedded in an elastic half space<sup>S40</sup>.

We considered a two-step modeling to simulate strain accumulation and release within a seismic cycle. In the first step, a frictionless aseismic slip is driven by the westernmost boundary element, whose eastern edge lies at about 190 km west of the BCF. This boundary is collocated with the N52°E trending Longriba fault<sup>S103, S104</sup> that slips dextrally at the rate of 4-6 mm/yr and accommodates convergence deformation as low as <1 mm/yr. With the imposed creeping rates on the westernmost element of 3 mm/yr perpendicular and 1 mm/yr parallel to the trend of the Longmen Shan, as well as convergent strain of  $2 \times 10^{-8}$  strain/yr, the Longmen Shan deforms in response to a non-uniformly creeping along the décollement and a uniform background strain. The geodetic-inferred velocity fields are considered as the surface manifestation of such a deformational process. Our simulation shows that this model predicts well the interseismic deformation across the Longmen Shan determined by GPS and leveling surveys (Fig. S21a). Uniform creep at a constant rate on the décollement could predict the surface displacement field equally well at a given uncertainty (1-2 mm/yr), and any change in the background strain within a range of  $10^{-8}$ - $10^{-9}$  strain/yr does not change the final result, implying the surface deformation process and strain accumulation in the vicinity of the fault are dominated by the creeping on a basal detachment fault rather than the diffusive straining. We document slip rates from a model that provides a good fit to surface interseismic displacements along the profile. From these rates, the cumulative displacements on these elements are calculated for 2,500 years of aseismic creeping on the décollement before a sudden stick-slip at the end of a seismic cycle.

In the second step, the freely slipping boundary elements are extended eastwards with the inclusion of sub-elements for the two ramp faults (BCF and PGF), and slip is driven by the accumulated slip deficit of 7.5 m on the westernmost element. The stick-slip is assumed to extend into the deep-seated décollement from the downdip end of the ramp, in response to stress relaxation very close to the Longmen Shan. Here, we focused on the changes in slip on the ramp and décollement beneath the Longmen Shan in an unconstrained strain release model<sup>S86</sup>. Slip along the décollement presumably occurs as either afterslip in response to stress changes following mainshock or coseismic slip due to the rate-weakening behavior as demonstrated during the Wenchuan earthquake and elsewhere<sup>S86, S105</sup>. The deep slip during the Wenchuan earthquake matches well the simulated slip on the lower half part of the

ramp and the décollement, but the observed slip at the shallow depth exceeds the simulated slip by 4-8 m (Fig. S21b), we interpret as the shallow slip excess, resulted from a plausible stress reservoir near to the surface.

## Reference

- S1 Wang, M. *et al.* Contemporary crustal deformation of the Chinese continent and tectonic block model. *Sci. China (Ser. D Suppl.)* **46**, 25-40 (2003).
- S2 Niu, Z., *et al.* Contemporary velocity field of crustal movement of Chinese mainland from Global Positioning System measurements. *Chin. Sci. Bull.* **50**, 939-941(2005).
- S3 Gan, W., Zhang, P., Shen, Z.-K., Niu, Z., Wang, M., Wan, Y., Zhou, D. & Cheng, J. Present-day crustal motion within the Tibetan Plateau inferred from GPS measurements. *J. Geophys. Res.* **112**, B08416 (2006).
- S4 Wei, Z., *et al.* Combined adjustment of nationwide astro-geodetic and space geodetic networks (in Chinese). *Acta Geod. Cart. Sin.* **29**, 283-288 (2000).
- S5 Yang, Y. Chinese geodetic coordinate system 2000. *Chin. Sci. Bull.* **54**, 2714-2721 (2009).
- S6 Wang, Q.-L. *et al.* Coseismic vertical deformation of the  $M_s$ 8.0 Wenchuan earthquake from repeated levelings and its constraint on listric fault geometry. *Earthquake Sci.* **22**, 595-602 (2009).
- S7 Liang, Z. Discussion on weight estimation in the adjustment of leveling network (in Chinese). *Acta Geod. Cart. Sin.* **12**, 56-66 (1983).
- S8 Szeliga, W., Bilham, R., Schelling, D., Kakar, D. & Lodi, S. Fold and thrust partitioning in a contracting fold belt: Insights from the 1931 Mach earthquake in Baluchistan. *Tectonics* **28**, TC5019 (2009).
- S9 Zumberge, J., Heflin, M., Jefferson, D., Watkins, M. & Webb, F. Precise point positioning for the efficient and robust analysis of GPS data from large networks. *J. Geophys. Res.* **102**, 5005-5017 (1997).
- S10 Freymueller, J., Cohen, S. & Fletcher, H. Spatial variations in present-day deformation, Kenai Peninsula, Alaska, and their implications. *J. Geophys. Res.* **105**, 8079-8102 (2000).
- S11 Altamimi, Z., Collilieux, X., Legrand, J., Garayt, B. & Boucher, C. ITRF2005: A new release of the International Terrestrial Reference Frame based on time series of station positions and Earth Orientation Parameters. *J. Geophys. Res.* **112**, B09401(2007).
- S12 Wang, Q. *et al.* Present-day crustal deformation in China constrained by Global Positioning System measurements. *Science* **294**, 574-577 (2001).
- S13 Shen, Z.-K., Sun, J., Zhang, P., Wan, Y., Wang, M., Bürgmann, R., Zheng, Y., Gan, W., Liao, H. & Wang, Q.-L. Slip maxima at fault junctions and rupturing of barriers during the 12 May 2008 Wenchuan earthquake. *Nature Geosci.* **2**, 718-724 (2009).
- S14 Working Group of the Crustal Motion Observation Network of China Project. Coseismic



- displacement field of the 2008  $M_s$ 8.0 Wenchuan earthquake determined by GPS (in Chinese). *Sci. China (Ser. D)* **38**, 1195-1206 (2008).
- S15 Liu, Y. *et al.* Co-seismic displacement of the  $M_s$ 8.0 Wenchuan earthquake in Sichuan, China (in Chinese). *Geol. Bull. Chi.* **27**, 2086-2088 (2008).
- S16 Hreinsdóttir, S., Freymueller, J., Bürgmann, R. & Mitchell, J. Coseismic deformation of the 2002 Denali Fault earthquake: Insights from GPS measurements. *J. Geophys. Res.* **111**, B03308 (2006).
- S17 Yu, S. B. *et al.* Preseismic deformation and coseismic displacements associated with the 1999 Chi-Chi, Taiwan, earthquake. *Bull. Seismol. Soc. Am.* **91**, 995-1012 (2001).
- S18 Chlieh, M. *et al.* Coseismic slip and afterslip of the great ( $M_w$ 9.15) Sumatra-Andaman earthquake of 2004. *Bull. Seism. Soc. Am.* **97**, S152-S173 (2007).
- S19 Banerjee, P., Pollitz, F., Nagarajan, B. & Bürgmann, R. Coseismic slip distributions of the 26 December 2004 Sumatra-Andaman and 28 March 2005 Nias earthquakes from GPS static offsets. *Bull. Seism. Soc. Am.* **97**, S86-S102 (2007).
- S20 Kobayashi, T., Takada, Y., Furuya, M. & Murakami, M. Locations and types of ruptures involved in the 2008 Sichuan earthquake inferred from SAR image matching. *Geophys. Res. Lett.* **36**, L07302 (2009).
- S21 Hao, K. X., Si, H., Fujiwara, H. & Ozawa, T. Coseismic surface-ruptures and crustal deformations of the 2008 Wenchuan earthquake  $M_w$ 7.9, China. *Geophys. Res. Lett.* **36**, L11303 (2009).
- S22 Feng, G., Hetland, E., Ding, X., Li, Z. & Zhang, L. Coseismic fault slip of the 2008  $M_w$ 7.9 Wenchuan earthquake estimated from InSAR and GPS measurements. *Geophys. Res. Lett.* **37**, L01302 (2010).
- S23 Tong, X., Sandwell, D. & Fialko, Y. Coseismic slip model of the 2008 Wenchuan earthquake derived from joint inversion of interferometric synthetic aperture radar, GPS, and field data. *J. Geophys. Res.* **115**, B04314 (2010).
- S24 Rosen, P., Henley, S., Peltzer, G. & Simons, M. Updated Repeat Orbit Interferometry Package Released. *Eos Trans. AGU* **85**, 47 (2004).
- S25 Goldstein, R. & Werner, C. Radar interferogram filtering for geophysical applications. *Geophys. Res. Lett.* **25**, 4035-4038(1995).
- S26 Feng, G., Hetland, E., Ding, X., & Li, Z. Fault slip distribution of the  $M_w$ 7.9 Wenchuan earthquake estimated from GPS and ALOS/PALSAR measurements. *EOS Trans. AGU*, T11A-1766 (2009).
- S27 Chen, C. & Zebker, H. Phase unwrapping for large SAR interferograms: statistical segmentation and generalized network models. *IEEE Trans. Geosci. Remote Sens.* **40**, 1709-1719 (2002).
- S28 Farr, T. *et al.* The Shuttle Radar Topography Mission. *Rev. Geophys.* **45**, RG2004 (2006).
- S29 Zhang, Y., Xu, L. & Chen, Y. Spatio-temporal variation of the source mechanism of the 2008 great Wenchuan (in Chinese). *Chin. J. Geophys.* **52**, 378-389 (2009).
- S30 Xu, X., Wen, X., Yu, G., Chen, G., Klinger, Y., Hubbard, J. & Shaw, J. Coseismic reverse- and

- oblique-slip surface faulting generated by the 2008  $M_w$ 7.9 Wenchuan earthquake, China. *Geology* **37**, 515-518 (2009).
- S31 Hubbard, J. & Shaw, J. Uplift of the Longmen Shan and Tibetan Plateau, and the 2008 Wenchuan ( $M_w$ 7.9) earthquake. *Nature* **458**, 191-194 (2009).
- S32 Li, Y., Jia, D., Shaw, J., Hubbard, J., Lin, A., Wang, M., Luo, L., Li, H. & Wu, L. Structural interpretation of the coseismic faults of the Wenchuan earthquake: Three-dimensional modeling of the Longmen Shan fold-and-thrust belt. *J. Geophys. Res.* **115**, B04317 (2010).
- S33 Schmidt, D. & Bürgmann, R. InSAR constraints on the source parameters of the 2001 Bhuj earthquake. *Geophys. Res. Lett.* **33**, L02315 (2006).
- S34 Wang, Z., Fukao, Y. & Pei, S. Structural control of rupturing of the  $M_w$ 7.9 2008 Wenchuan Earthquake, China. *Earth Planet. Sci. Lett.* **279**, 131-138 (2009).
- S35 Chen, J., Liu, Q., Li, S., Guo, B., Li, Y., Wang, J. & Qi, S. Seismotectonics study by relocation of the Wenchuan  $M_s$ 8.0 earthquake sequence (in Chinese). *Chin. J. Geophys.* **52**, 390-397 (2009).
- S36 Zhu, A., Xu, X., Yin, J., Zhou, Y., Gan, W. & Chen, G. Relocation of small earthquakes in western Sichuan, China and its implications for active tectonics (in Chinese). *Chin. J. Geophys.* **48**, 629-636 (2005).
- S37 Avouac, J.-P. Dynamic processes in extensional and compressional settings-mountain building: From earthquakes to geological deformation. *Treatise on Geophysics* **6**, 377-439 (2008).
- S38 Carena, S., Suppe, J. & Kao, H. Active detachment of Taiwan illuminated by small earthquakes and its control of first-order topography. *Geology* **30**, 935-938 (2002).
- S39 Stark, P. & Parker, R. Bounded-variable least-squares: An algorithm and applications. *J. Comp. Stat.* **10**, 129-141(1995).
- S40 Okada, Y. Surface deformation due to shear and tensile faults in a half-space. *Bull. Seismol. Soc. Am.* **75**, 1135-1154 (1985).
- S41 Lohman, R. B. & Simons, M. Some thoughts on the use of InSAR data to constrain models of surface deformation: Noise structure and data downsampling. *Geochem. Geophys. Geosyst.* **6**, Q01007 (2005).
- S42 Pritchard, M. E., Simons, M., Rosen, P., Hensley, S. & Webb, F. Co-seismic slip from the 1995 July 30  $M_w$ =8.1 Antofagasta, Chile, earthquake as constrained by InSAR and GPS observations. *Geophys. J. Int.* **150**, 362-376 (2002).
- S43 Elliott, J., Freymueller, J. & Rabus, B. Coseismic deformation of the 2002 Denali fault earthquake: Contributions from synthetic aperture radar range offsets. *J. Geophys. Res.* **112**, B06421 (2007).
- S44 Bürgmann, R., Ayhan, M., Fielding, E. J., Wright, T. J., McClusky, S., Aktug, N., Demir, C., Lenk, O. & Türkezer, A. Deformation during the 12 November 1999, Düzce, Turkey earthquake, from GPS and InSAR data. *Bull. Seismol. Soc. Am.* **92**, 161-171 (2002).
- S45 Johanson, I., Fielding, E. J., Rolandone, F. & Bürgmann, R. Coseismic and postseismic slip of the 2004 Parkfield earthquake from space-geodetic data. *Bull. Seismol. Soc. Am.* **96**, S269-S282 (2006).

- s46 Xu, C., Liu, Y., Wen, Y. & Wang, R. Coseismic slip distribution of the 2008  $M_w$ 7.9 Wenchuan earthquake from joint inversion of GPS and InSAR data. *Bull. Seismol. Soc. Am.* **100**, 2736-2749 (2010).
- s47 Lawson, C. L. & Hanson, R. J. *Solving Least Squares Problems* (Prentice Hall, Englewood Cliffs, N. J. 1974).
- s48 Lasserre, C., Peltzer, G., Crampé, F., Klinger, Y., van der Woerd, J. & Tapponnier, P. Coseismic deformation of the 2001  $M_w$ =7.8 Kokoxili earthquake in Tibet, measured by synthetic aperture radar interferometry. *J. Geophys. Res.* **110**, B12408 (2005).
- s49 Funning, G. J., Parsons, B., Wright, T. J., Jackson, J. A. & Fielding, E. J. Surface displacements and source parameters of the 2003 Bam (Iran) earthquake from ENVISAT advanced synthetic aperture radar imagery. *J. Geophys. Res.* **110**, B09406 (2005).
- s50 Funning G. J. *et al.* Fault slip in the 1997 Manyi, Tibet earthquake from linear elastic modeling of InSAR displacements. *Geophys. J. Int.* **169**, 988-1008 (2007).
- s51 Sun, J., Shen, Z.-K., Xu, X. & Bürgmann, R. Synthetic normal faulting of the 9 January 2008 Nima (Tibet) earthquake from conventional and along-track SAR interferometry. *Geophys. Res. Lett.* **35**, L22308 (2008).
- s52 Du, Y., Aydin, A. & Segall, P. Comparison of various inversion techniques as applied to the determination of a geophysical deformation model for the 1983 Borah Peak earthquake. *Bull. seism. Soc. Am.* **82**, 1840-1866 (1992).
- s53 Burchfiel, B. C., Royden, L. H., van der Hilst, R., Hager, B., Chen, Z., King, R., Li, C., Lu, J., Yao, H. & Kirby, E. A geological and geophysical context for the Wenchuan earthquake of 12 May 2008, Sichuan, People's Republic of China. *GSA Today* **18**, 4-11 (2008).
- s54 Johnson, K. & Segall, P. Imaging the ramp-décollement geometry of the Chelungpu fault using coseismic GPS displacements from the 1999 Chi-Chi, Taiwan earthquake. *Tectonophysics* **378**, 123-139 (2004).
- s55 Lin, A., Ren, Z., Jia, D. & Wu, X. Co-seismic thrusting rupture and slip distribution produced by the 2008  $M_w$ 7.9 Wenchuan earthquake, China. *Tectonophysics* **471**, 203-215 (2009).
- s56 Liu-Zeng, J. *et al.* Co-seismic ruptures of the 12 May 2008,  $M_s$ 8.0 Wenchuan earthquake, Sichuan: East-west crustal shortening on oblique, parallel thrusts along the eastern edge of Tibet. *Earth Planet. Sci. Lett.* **286**, 355-370 (2009).
- s57 Rockwell, T., Lindvall, S., Dawson, T., Langridge, R., Lettis, W. & Klinger, Y. Lateral offsets on surveyed cultural features resulting from the 1999 Izmit and Düzce earthquakes, Turkey. *Bull. Seismol. Soc. Am.* **92**, 79-94 (2002).
- s58 Klinger, Y., Michel, R. & King, G. Evidence for a barrier model from  $M_w$ 7.8 Kokoxili (Tibet) earthquake slip-distribution. *Earth Planet. Sci. Lett.* **242**, 354-364 (2006).
- s59 Wang, R., Martin, L. & Roth, F. Computation of deformation induced by earthquakes in a multi-layered elastic crust—FORTRAN programs EDGRN/EDCMP. *Comp. & Geosci.* **29**, 195-207 (2003).
- s60 Bassin, C., Laske, G. & Masters, G. The current limits of resolution for surface wave tomography in North America. *EOS* **81**, F897 (2000).

- s61 Wang, C., Han, W., Wu, J., Lou, H. & Chan, W. Crustal structure beneath the eastern margin of the Tibetan Plateau and its tectonic implications. *J. Geophys. Res.* **112**, B07307 (2007).
- s62 Zhang, Z. *et al.* Crustal structure across Longmenshan fault belt from passive source seismic profiling. *Geophys. Res. Lett.* **36**, L17310 (2009).
- s63 Parsons, T., Chen, J., Kirby, E. Stress changes from the 2008 Wenchuan earthquake and increase hazard in the Sichuan basin. *Nature* **454**, 509-510 (2008).
- s64 Toda, S., Lin, J., Meghraoui, M. & Stein, R. 12 May 2008 M=7.9 Wenchuan, China, earthquake calculated to increase failure stress and seismicity rate on three major fault systems. *Geophys. Res. Lett.* **35**, L17305 (2008).
- s65 Zhang, Y., Feng, W., Xu, L., Zhou, C. & Chen, Y. Spatio-temporal rupture process of the 2008 great Wenchuan earthquake. *Sci. China (Ser. D)* **52**, 145-154 (2009).
- s66 Ji, C. & Hayes, G. Preliminary result of the May 12, 2008  $M_w$ 7.9 eastern Sichuan, China earthquake [[http://earthquake.usgs.gov/eqcenter/eqinthenews/2008/us2008ryan/finite\\_fault.php](http://earthquake.usgs.gov/eqcenter/eqinthenews/2008/us2008ryan/finite_fault.php)] (2008).
- s67 Nishimura, N. & Yagi, Y. Rupture process for May 12, 2008 Sichuan earthquake (Ver.2) [<http://www.geol.tsukuba.ac.jp/~nishimura/20080512>] (2008).
- s68 Wang, W., Zhao, L., Li, J. & Yao, Z. Rupture process of the  $M_s$ 8.0 Wenchuan earthquake of Sichuan China (in Chinese). *Chin. J. Geophys.* **51**, 1403-1410 (2008).
- s69 Zhao, C., Chen, Z., Zhou, L., Li, Z. & Kang, Y. Rupture process of the 8.0 Wenchuan earthquake of Sichuan, China: the segmentation feature. *Chin. Sci. Bull.* **55**, 284-292 (2010).
- s70 Nakamura, T., Tsuboi, S., Kaneda, Y. & Yamanaka, Y. Rupture process of the 2008 Wenchuan, China earthquake inferred from teleseismic waveform inversion and forward modeling of broadband seismic waves. *Tectonophysics* **491**, 72-84 (2010).
- s71 Zhang, G., Qu, C., Song, X., Wang, C., Shan, X. & Hu, Q. Slip distribution and source parameters inverted from coseismic deformation derived by InSAR technology of Wenchuan  $M_w$ 7.9 earthquake (in Chinese). *Chin. J. Geophys.* **53**, 269-279 (2010).
- s72 Xu, C., Liu, Y. & Wen, Y.  $M_w$ 7.9 Wenchuan earthquake slip distribution inversion from GPS measurements (in Chinese). *Acta Geod. Cart. Sin.* **38**, 195-201 (2009).
- s73 Li, Z., Zhang, P., Jin, S., Jiang, Z. & Wen, Y. Wenchuan earthquake deformation fault inversion and analysis based on GPS observations (in Chinese). *Acta Geod. Cart. Sin.* **38**, 109-113 (2009).
- s74 Wang, M. Coseismic distribution of the 2008 Wenchuan great earthquake constrained using GPS coseismic displacement field (in Chinese). *Chin. J. Geophys.* **52**, 2519-2526 (2009).
- s75 Hashimoto, M., Enomoto, M. & Fukushima, Y. Coseismic deformation from the 2008 Wenchuan, China, earthquake derived from ALOS/PALSAR Images. *Tectonophysics* **491**, 59-71 (2010).
- s76 Segall, P. & Rice, J. Dilatancy, compaction, and slip instability of a fluid-infiltrated fault. *J. Geophys. Res.* **100**, 22155-22171(1995).
- s77 Ge, S., Liu, M., Lu, N., Godt, W. & Luo, G. Did the Zipingpu Reservoir trigger the 2008 Wenchuan earthquake? *Geophys. Res. Lett.* **36**, L20315 (2009).
- s78 Olson, E. & Allen, R. The deterministic nature of earthquake rupture. *Nature* **438**, 212-215

- (2005).
- s79 Ellsworth, W. & Beroza, G. Seismic evidence for an earthquake nucleation phase. *Science* **268**, 851-855 (1995).
- s80 Wesnousky, S. Predicting the endpoints of earthquake ruptures. *Nature* **444**, 358-360 (2006).
- s81 Wang, W., Ni, S., Chen, Y. & Kanamori, H. Magnitude estimation for early warning applications using the initial part of P waves: A case study on the 2008 Wenchuan sequence. *Geophys. Res. Lett.* **36**, L163805 (2009).
- s82 Ji, C., Helmberger, D., Song, T., Ma, K. & Wald, D. Slip distribution and tectonic implication of the 1999 Chi-Chi, Taiwan, earthquake. *Geophys. Res. Lett.* **28**, 4379-4382 (2001).
- s83 Taylor, F., Briggs, R. W., Frohlich, C., Brown, A., Hornbach, M., Papabatu, A. K., Metzner, A. J. & Billy, D. Rupture across arc segment and plate boundaries in the 1 April 2007 Solomons earthquake. *Nature Geosci.* **1**, 253-257 (2008).
- s84 Chen, T., Newman, A., Feng, L. & Fritz, H. Slip distribution from the 1 April 2007 Solomon Islands earthquake: A unique image of near-trench rupture. *Geophys. Res. Lett.* **36**, L16307 (2009).
- s85 Hsu, Y. *et al.* Frictional afterslip following the 2005 Nias-Simeulue earthquake, Sumatra. *Science* **312**, 1021-1026 (2006).
- s86 Feldl, N. & Bilham, R. Great Himalayan earthquakes and the Tibetan Plateau. *Nature* **444**, 165-170 (2006).
- s87 Oglesby, D. & Day, S. Fault geometry and the dynamics of the 1999 Chi-Chi (Taiwan) earthquake. *Bull. Seism. Soc. Am.* **91**, 1099-1111 (2001).
- s88 Beroza, G. & Zoback, M. Mechanism diversity of the Loma Prieta aftershocks and the mechanics of mainshock-aftershock interaction. *Science* **259**, 211-213 (1992).
- s89 Wang, Q.-C., Chen, Z. & Zheng, S. Spatial segmentation characteristic of focal mechanism of aftershock sequence of Wenchuan Earthquake. *Chin. Sci. Bull.* **54**, 2263-2270 (2009).
- s90 Wdowinsky, S. Deep creep as a cause for the excess seismicity along the San Jacinto fault. *Nature Geosci.* **2**, 882-885 (2009).
- s91 Kumar, S., Wesnousky, G., Rockwell, T. K., Briggs, R. W., Thakur, V. C. & Jayangondaperumal, R. Paleoseismic evidence of great surface rupture earthquakes along the Indian Himalaya. *J. Geophys. Res.* **111**, B03304 (2006).
- s92 Lave, J., Yule, D., Sapkota, S., Basnt, K., Madden, C., Attal, M. & Pandey, R. Evidence for a great medieval earthquake (1100 A.D.) in the central Himalayas, Nepal. *Science* **307**, 1302-1305 (2005).
- s93 Fialko, Y., Sandwell, D., Simons, M. & Rosen, P. Three dimensional deformation caused by the Bam, Iran, earthquake and the origin of shallow slip deficit. *Nature* **435**, 295-299 (2005).
- s94 Zhang, P., Wen, X., Shen, Z.-K., & Chen, J. Oblique, high-angle, listric-reverse faulting and associated development of strain: The Wenchuan earthquake of May 12, 2008, Sichuan, China. *Annu. Rev. Earth Planet. Sci.* **38**, 351-380 (2010).
- s95 King, G. & Vita-Finzi, C. Active folding in the Algerian earthquake of 10 October 1980. *Nature* **292**, 22-26 (1981).

- s96 Thatcher, W. Order and diversity in the modes of circum-Pacific earthquake recurrence. *J. Geophys. Res.* **95**, 2609-23(1990).
- s97 Satake, K. & Atwater, B. Long-term perspectives on giant earthquakes and tsunamis at subduction zones. *Annu. Rev. Earth Planet. Sci.* **35**, 349-374 (2007).
- s98 Duan, B. & Oglesby, D. Heterogeneous fault stresses from previous earthquakes and the effect on dynamics of parallel strike-slip faults. *J. Geophys. Res.* **111**, B05309 (2006).
- s99 Shaw, B. & Scholz, C. H. Slip-length scaling in large earthquake: Observations and theory and implications for earthquake physics. *Geophys. Res. Lett.* **28**, 2995-2998 (2001).
- s100 Ogalesby, D. Rupture termination and jump on parallel offset faults. *Bull. Seism. Soc. Am.* **98**, 440-447 (2008).
- s101 Ruff, L. & Kanamori, H. Seismicity and the subduction process. *Phys. Earth Planet. Inter.* **23**, 240-252 (1980).
- s102 Gomberg, J. & Ellis, M. Topography and tectonics of the central New Madrid seismic zone: Results of numerical experiments using a three-dimensional boundary-element program. *J. Geophys. Res.* **99**, 20299-20310 (1994).
- s103 Shen, Z.-K., Lu, J., Wang, M. & Bürgmann, R. Contemporary crustal deformation around southeast borderland of Tibetan plateau. *J. Geophys. Res.* **110**, B11409 (2005).
- s104 Xu, X., Wen, X., Chen, G. & Yu, G. Discovery of the Longriba fault zone in eastern Bayan Har block, China and its tectonic implications. *Sci. China (Ser. D)* **45**, 1209-1223 (2008).
- s105 Konca, O. *et al.* Partial rupture of a locked patch of the Sumatra megathrust during the 2007 earthquake sequence. *Nature* **456**, 631-635 (2008).



## Rupture of deep faults in the 2008 Wenchuan earthquake and uplift of the Longmen Shan

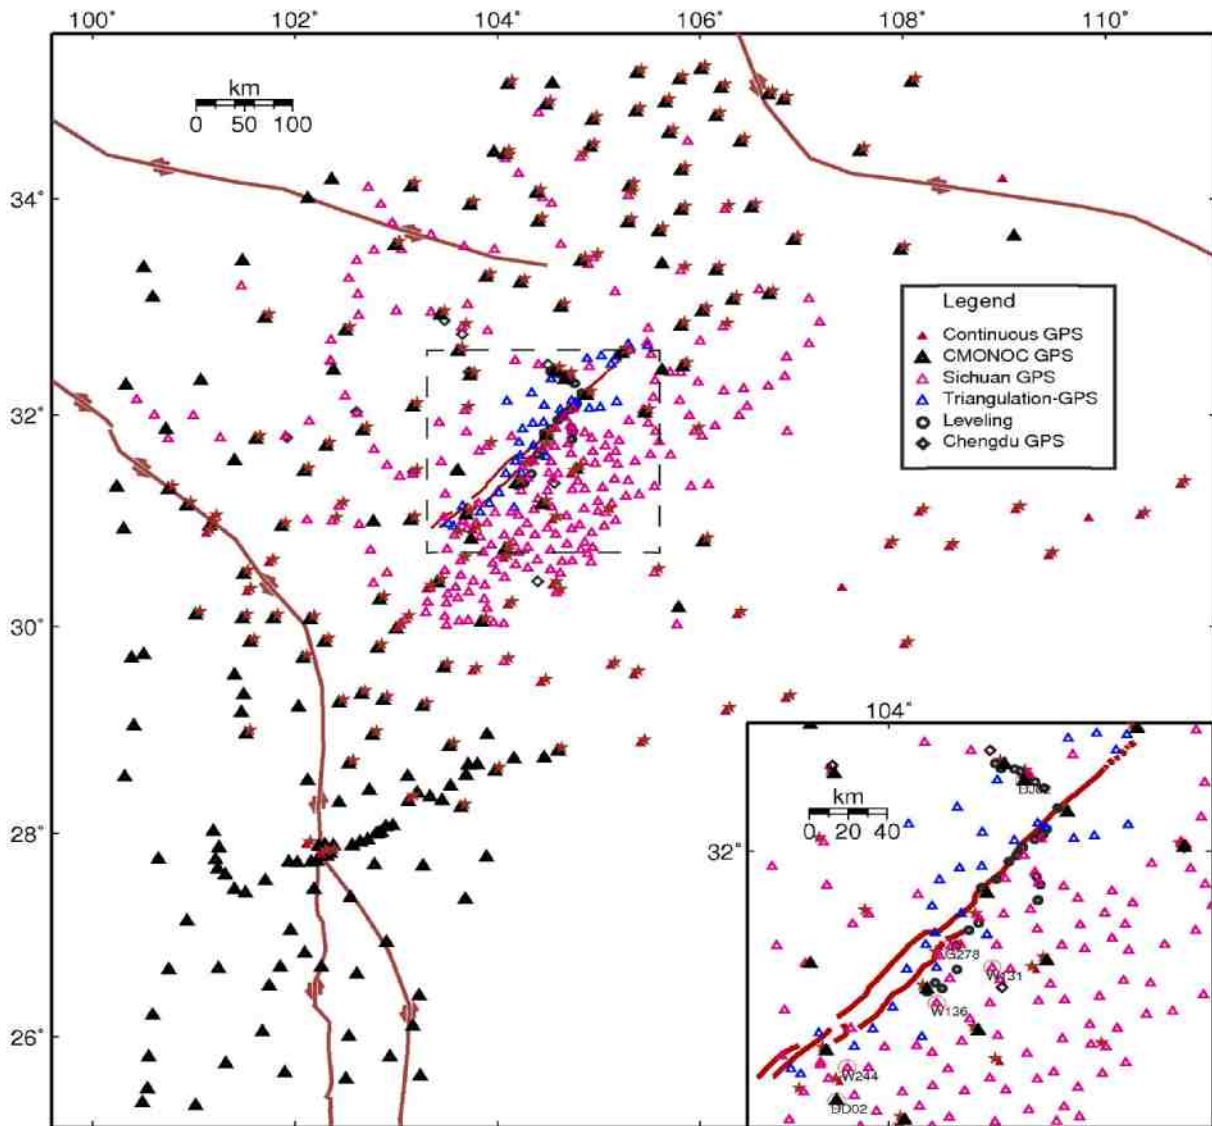

**Figure S1 | Geodetic observations for the 2008 Wenchuan earthquake.** The ground-based geodetic markers for the determination of surface displacements due to the Wenchuan earthquake. The inset legend indicates different sorts of geodetic surveys in the study. The triangles accompanied with red stars upper-right show the 158 GPS sites whose surface displacements were previously published<sup>S14</sup>. The lower-right inset shows an enlarged view on the surface rupture zone. The six circled triangles with 4-char code represent the common sites for coordinate system transformation.

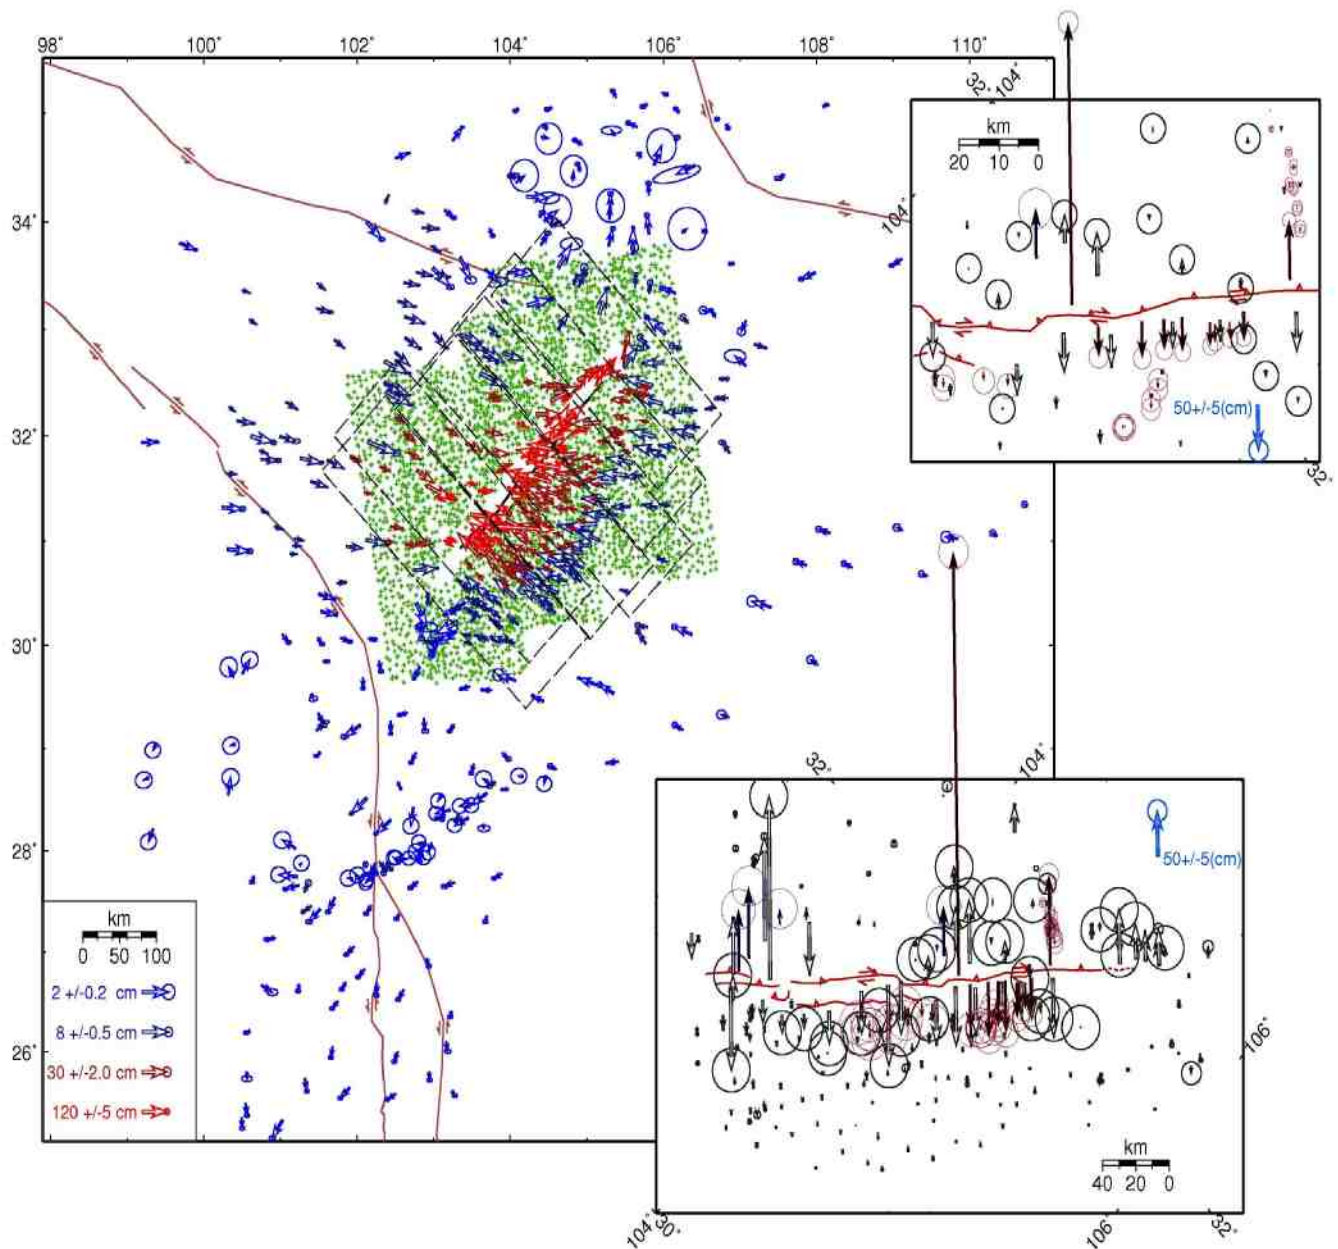

**Figure S2 | Ground-based surface displacements associated with the 2008 Wenchuan earthquake.** A total of 506 horizontal vectors are depicted by scaled arrows and 95% confidence ellipses ( $2\sigma$  uncertainty) with the color coding for vector scale shown in the inset legend. The dashed boxes define GPS displacement profiles within which GPS displacements are projected onto the LOS direction. The green pluses represent InSAR samples used in the final inversion. The lower right inset shows vertical displacements close to the surface rupture from GPS (black) and 42 spirit leveling measurements (red). In the upper right inset, a close-up view of vertical displacements of GPS sites near to the faults.



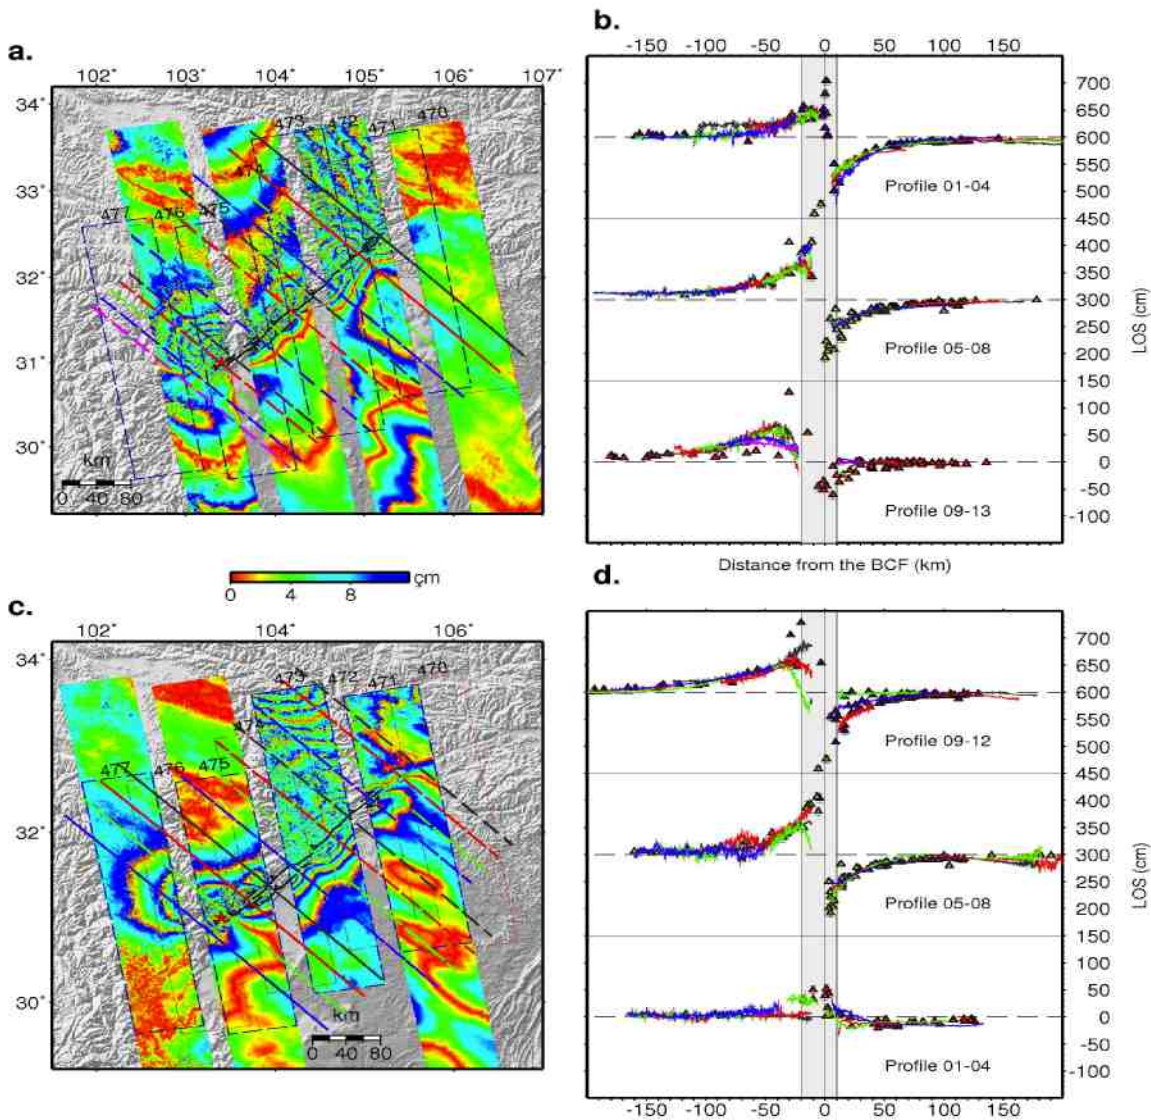

**Figure S3 | InSAR interferograms associated the Wenchuan earthquakes and displacement profiles.** **a**, InSAR fringes are derived from four ALOS tracks of radar image 470, 472, 474 and 476. The dashed boxes defined areas within which the samples of InSAR range offsets are extracted for a comparison with the GPS data. The range of colors from blue to red, shown in the color bar at the bottom, corresponds to one fringe, representing  $\sim 11.8$  cm of range change. The dashed boxes delineate coverage of samples from 8 ALOS tracks. **b**, GPS-derived surface displacements vs space-borne InSAR range changes along profiles across the fault. InSAR data (colored dots) are re-sampled along 100 m-wide colored belts. Profiles 1-13 correspond to colored dashed lines arranged in order from southwest to northeast in **a**. GPS data (colored triangles) are extracted from the 80 km-wide profiles in Fig. S2, and the 3-D displacements are projected onto the LOS direction. **c**, InSAR fringes from tracks 471, 473, 475 and 477. **d**, Profiles 1-12 correspond colored dashed lines placed in order from northeast to southwest in **c**.

## Rupture of deep faults in the 2008 Wenchuan earthquake and uplift of the Longmen Shan

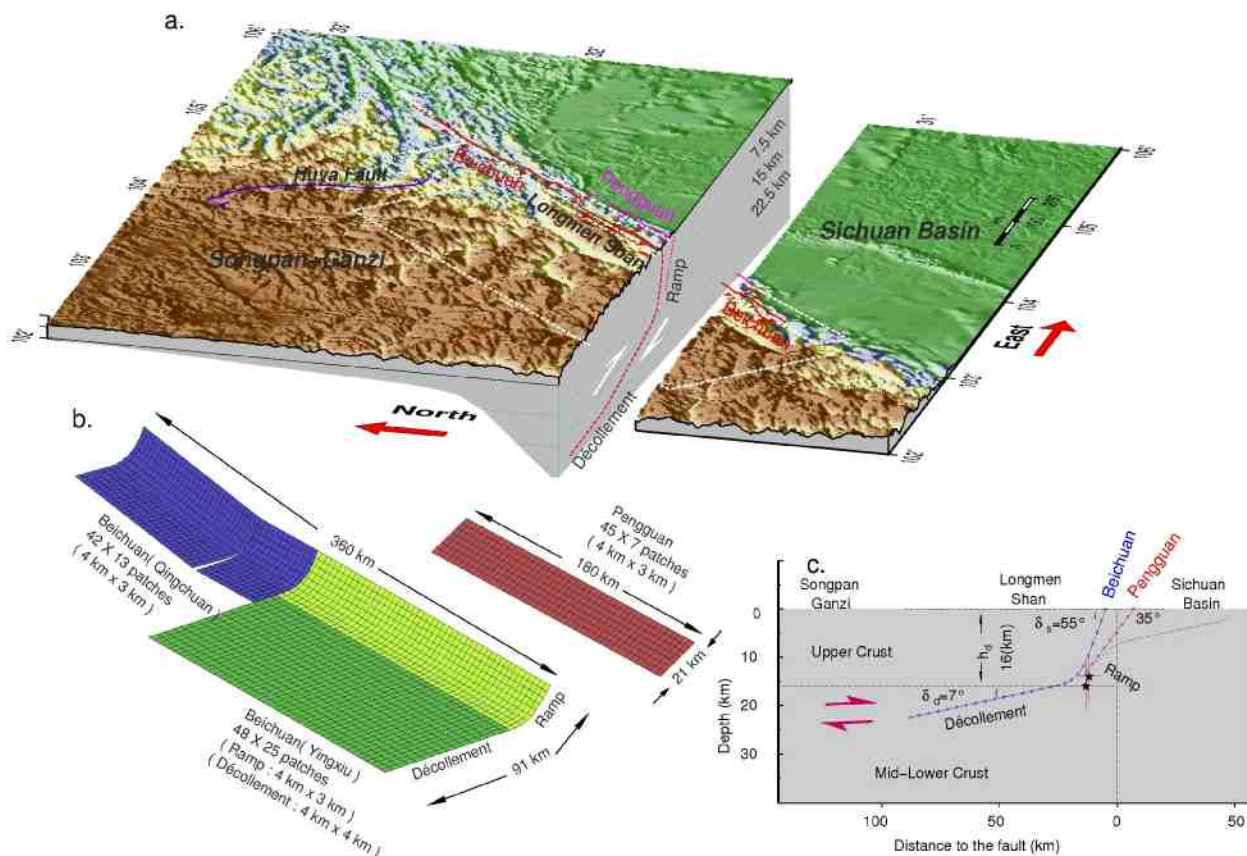

**Figure S4 | 3-D perspective of the Longmen Shan and discretized subsurface fault geometry.**

**a,** The relief topography of the Longmen Shan, Songpan-Ganzi and Sichuan Basin is dissected along the latitude of the epicenter. The colored lines show the surface rupture on the Beichuan fault (BCF, red) and Pengguan fault (PGF, pink). The dashed white line outlines surface projection of the rupture planes. **b,** The three fault planes are displayed with colored patches. The light and dark green patches mark respectively the shallow ramp (the top 9 rows of subfaults) and deep-seated décollement (the last 16 rows of subfaults at the bottom) for which different-sized grids are implemented. **c,** The model geometry of the Yingxiu segment of the BCF in cross section is defined by the dip-angle at the surface  $\delta_s$ , the dip-angle at the downdip end of a ramp  $\delta_d$  and the depth of décollement  $h_d$ . The PGF has a fixed dip angle of  $35^\circ$ .

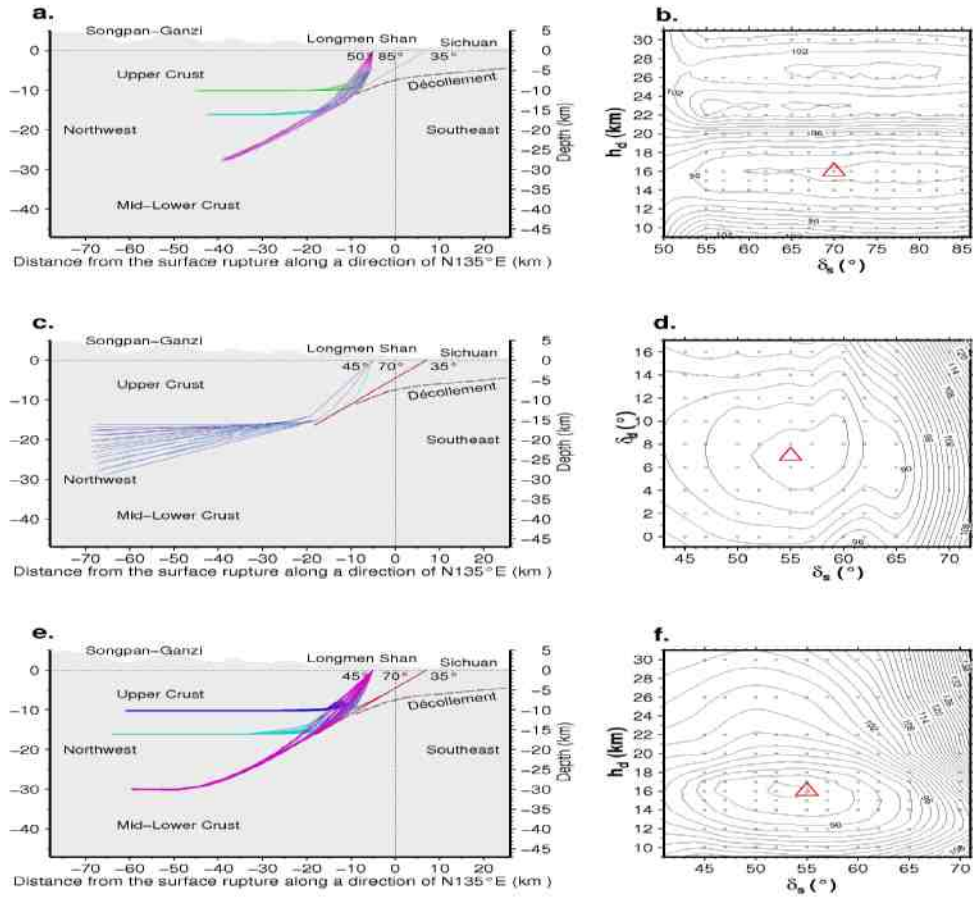

**Figure S5 | Cross section of fault models and grid search for the optimal fault geometry.**

The model geometry in cross section is defined by the dip-angle at the surface  $\delta_s$ , the dip-angle at the downdip end of a ramp  $\delta_d$  and the depth of décollement  $h_d$ . The solid red line laced with dots marks the PGF. The solid blue line with dots shows the preferred model for the YX segment of the BCF. The blue solid lines represent optional models for inversion of slip. **a**, Schematic fault models changed with  $50^\circ < \delta_s < 85^\circ$ ,  $\delta_d = 7^\circ$ ,  $h_d = 10, 16, 30$  km for the QC segment of the BCF. **b**, Contour plot of the global misfits of 90 optional models (partly shown in **a**) defined as the rms of postfit residuals of GPS displacements. Contours are interpolated between these discrete points (dots), drawn every 0.01 and labeled every 0.1. **c**, Schematic fault models changed with  $45^\circ < \delta_s < 70^\circ$ ,  $0^\circ < \delta_d < 15^\circ$ ,  $h_d = 16$  km for the YX segment of the BCF. **d**, Contour plot of the global misfits of 100 optional models partly shown in **c**. **e**, Schematic fault models changed with  $45^\circ < \delta_s < 70^\circ$ ,  $\delta_d = 7^\circ$ ,  $h_d = 10, 16, 30$  km for the YX segment of the BCF. **f**, Contour plot of the global misfits of 90 optional models (partly shown in **e**).



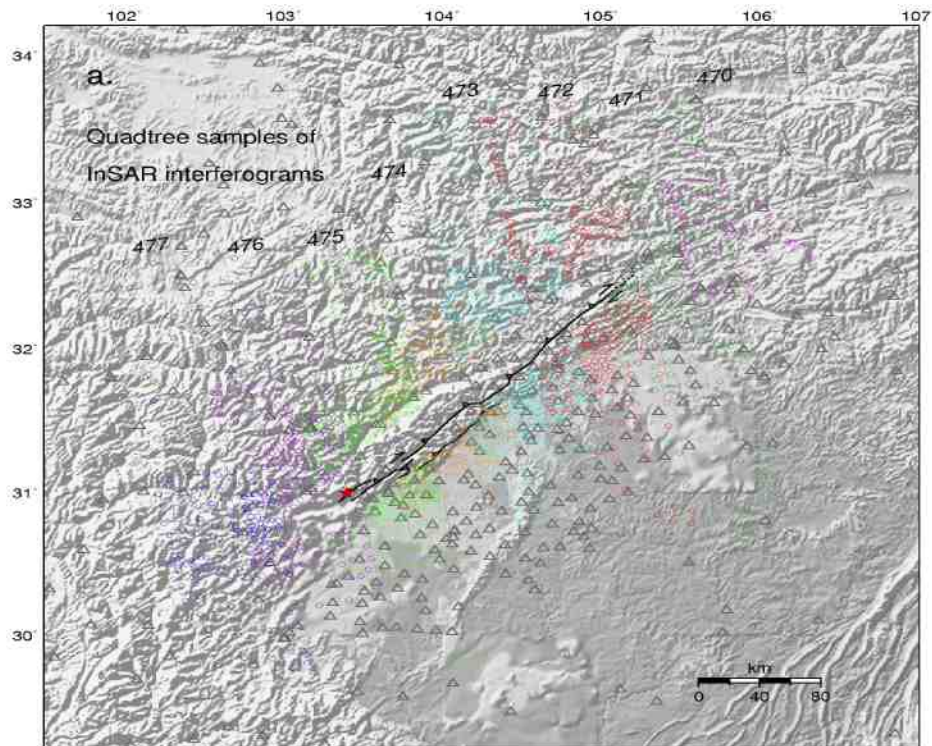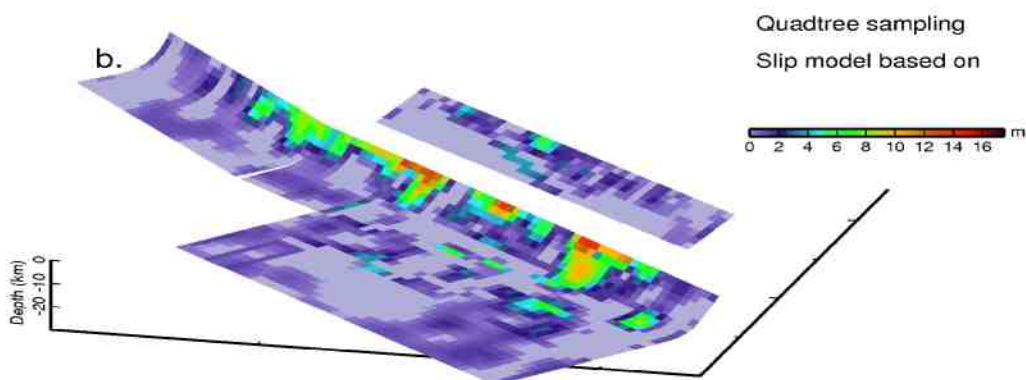

**Figure S6 | Quadtree sampling of InSAR interferogram and slip model.**

**a**, A total of 1,999 samples (colored circles) re-sampled from 8 tracks of interferograms using a quadtree method. The triangles indicate ground-based geodetic markers. **b**, The slip model inverted from the 1,999 samples and ground-based geodetic data with our preferred fault geometry and constraints. The 3D rupture planes viewed from N255°E southwest and 20° elevation above the ground.

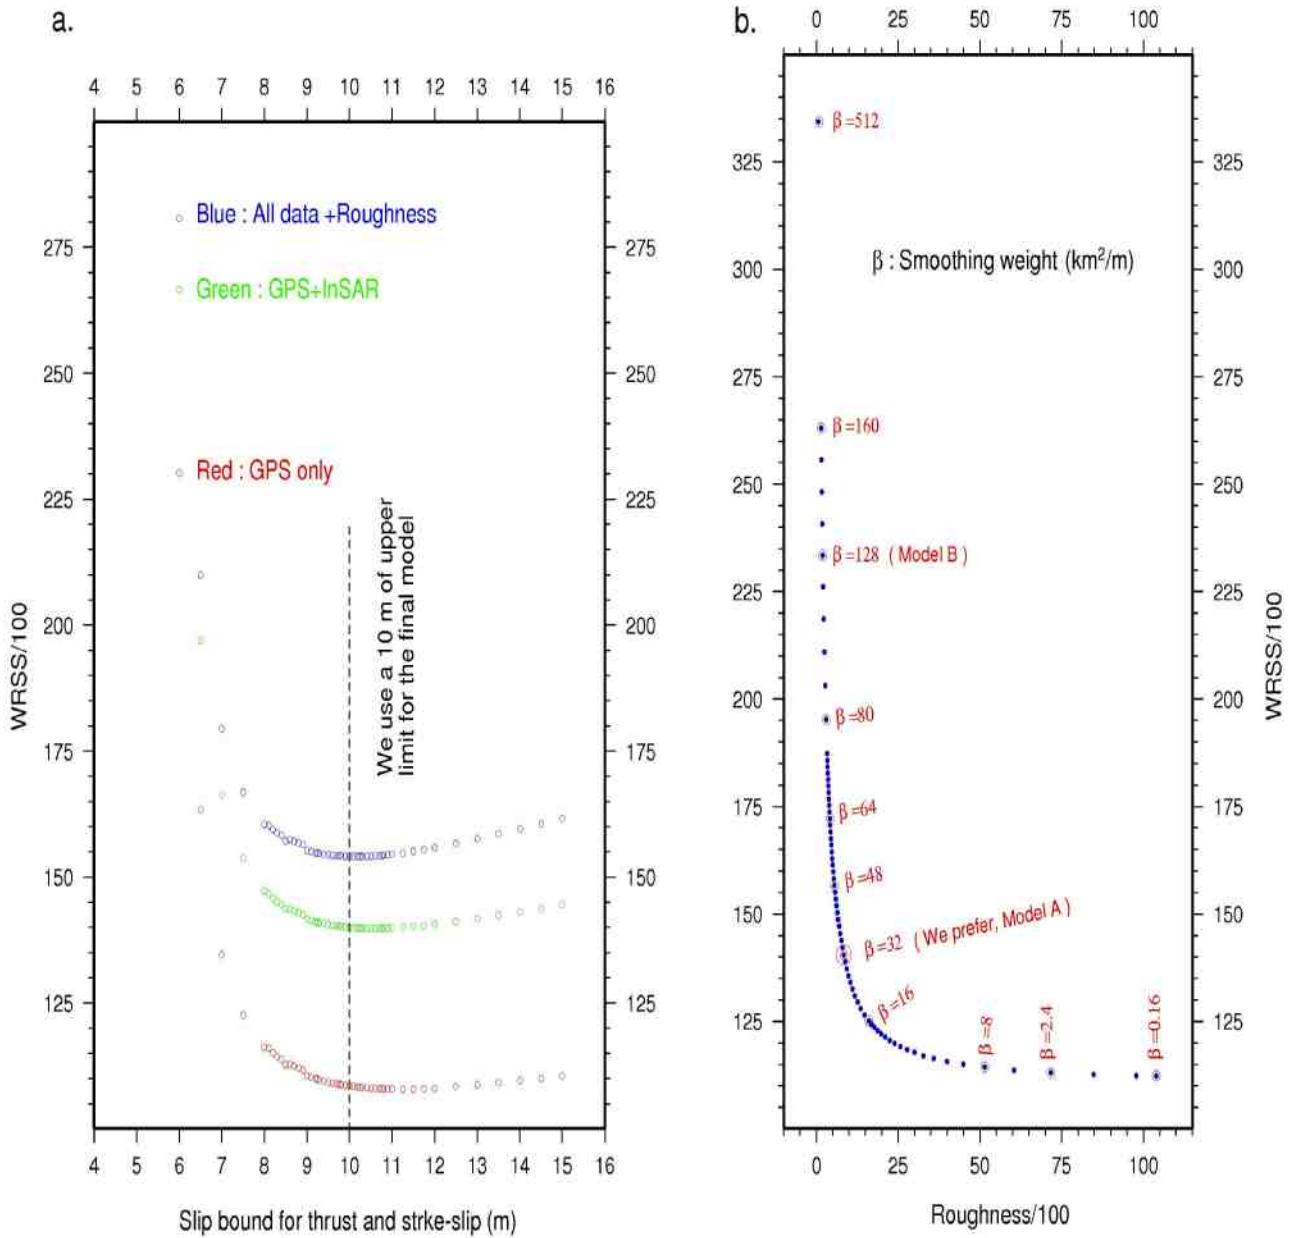

**Figure S7 | Tradeoff curves for the inversion hyper-parameters**

**a.** The upper bound on slip vectors. The data misfit increases sharply if the upper bound on slip is set to less than 8 m and increases gently if it is set to larger than 12 m. **b.** The trade-off between the data misfit and slip roughness. The smoothing weight  $\beta$  is optimized from over-smoothed and extremely rough models (blue dots). The preferred model (Model A in Tab S2,  $\beta = 32 \text{ km}^2/\text{m}$ ) is shown by the larger red circle.

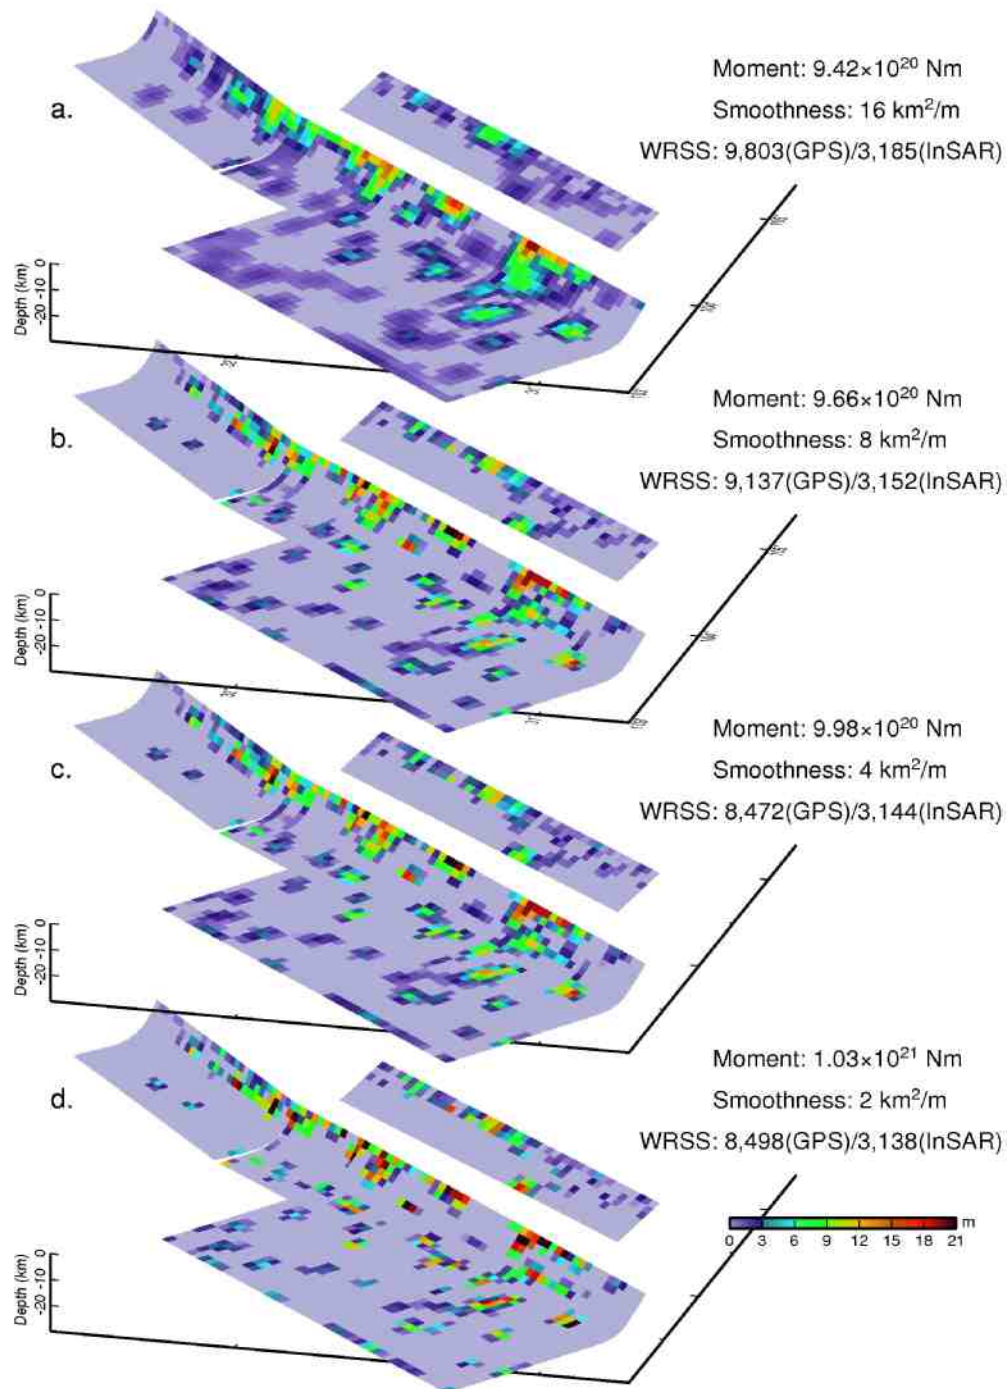

**Figure S8 | Slip models with varied weak smoothness imposed**

Slip models are constructed with a NNLS-like inversion and respectively constrained by imposing variable smoothing weights  $\beta$  in a range of 2-16  $\text{km}^2/\text{m}$ . With  $\beta < 16 \text{ km}^2/\text{m}$ , rupture becomes more fragmented, focusing on numerous small asperities with local peak slip  $> 3 \text{ m}$ .



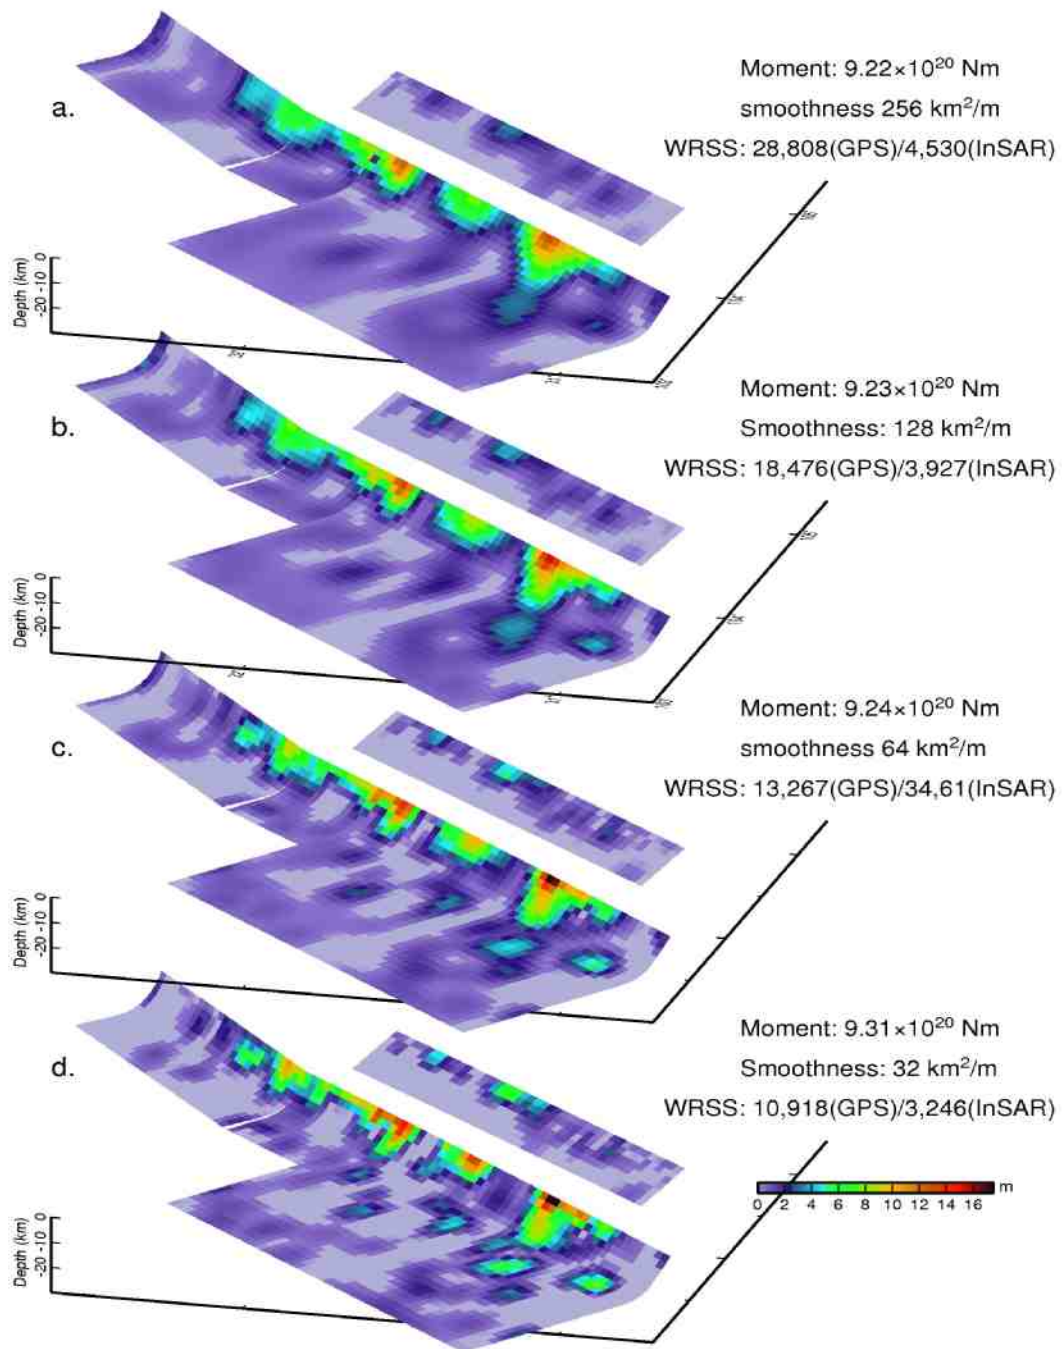

**Figure S9 | Slip models with varied moderate smoothness imposed**

Slip models are constructed with a NNLS-like inversion and respectively constrained by imposing variable smoothing weights  $\beta$  in a range of 32-256  $\text{km}^2/\text{m}$ . The number of asperities in the estimated slip model remains the same until  $\beta = 256 \text{ km}^2/\text{m}$  with which asperities begin to merge (but the data misfit is 3 times larger).

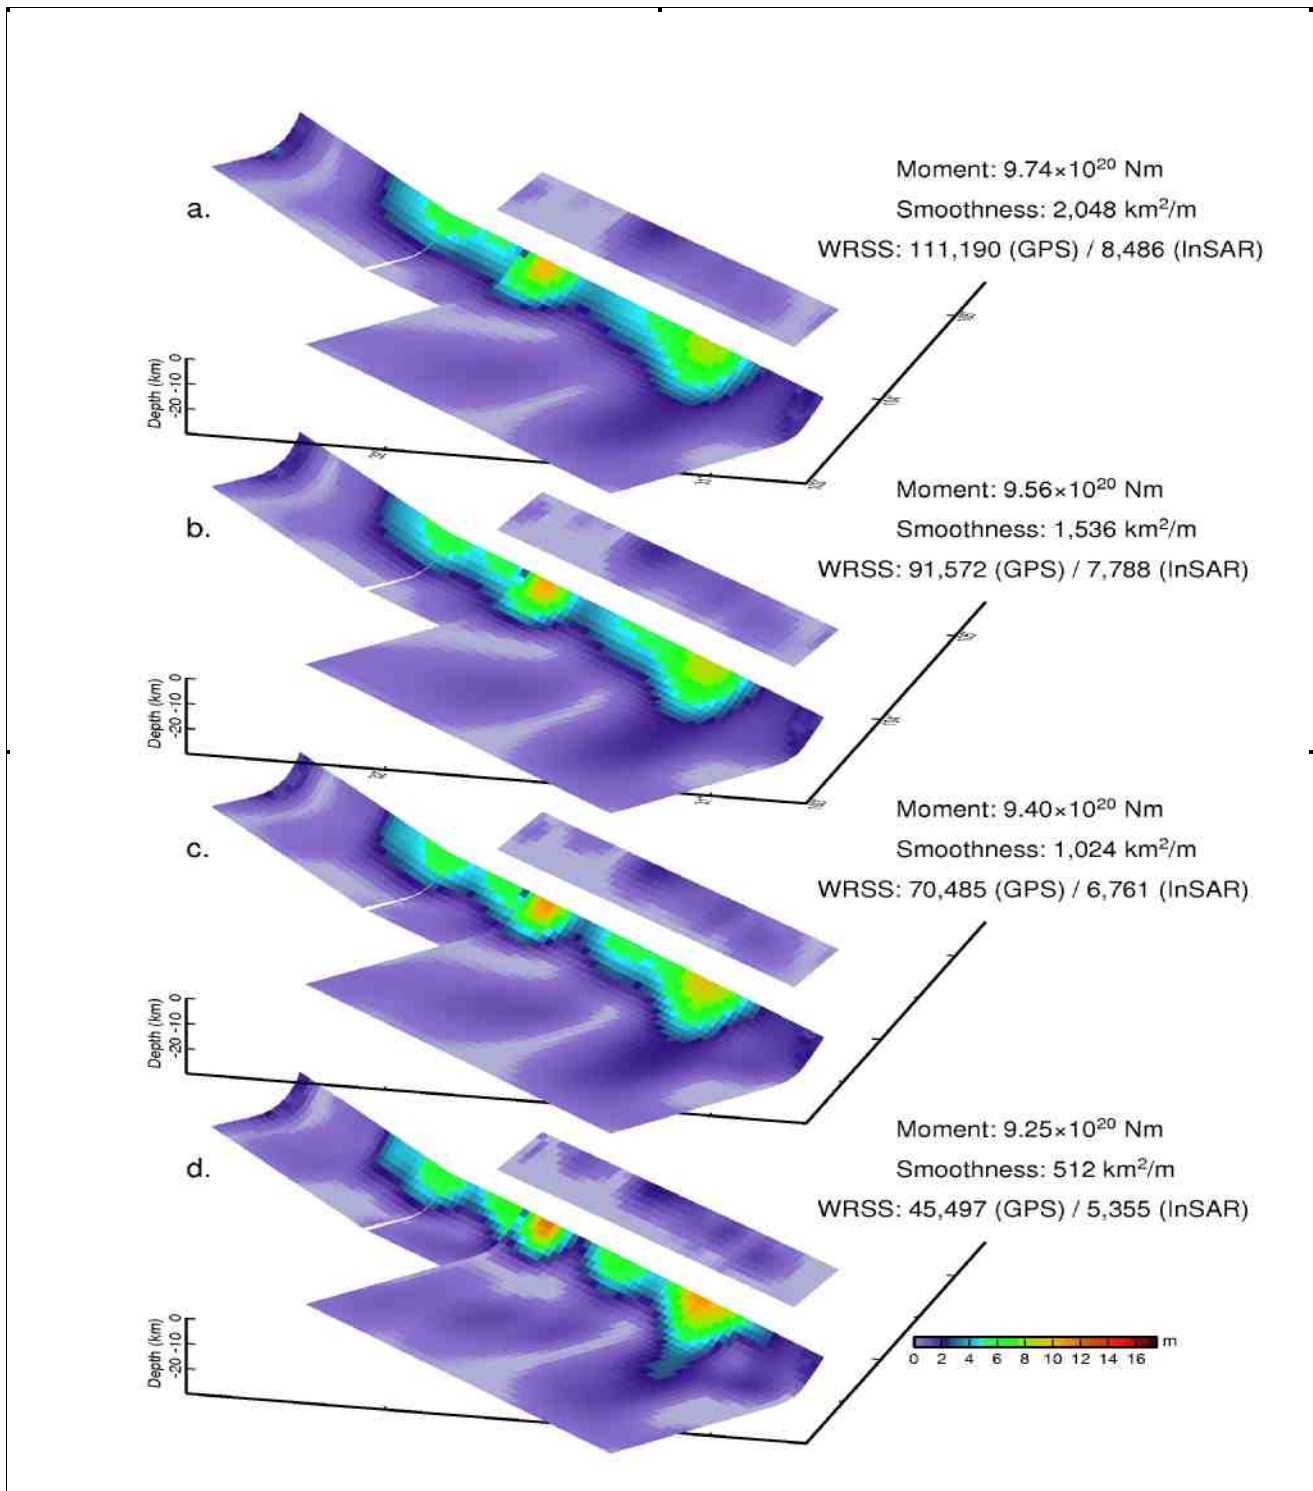

**Figure S10 | Slip models with varied strong smoothness imposed**

Slip models are constructed with a NNLS-like inversion and respectively constrained by imposing variable smoothing weights  $\beta$  in a range of 512-2,048 km<sup>2</sup>/m. At  $\beta = 1,024$  km<sup>2</sup>/m, the discrete deep asperities spread into a diffuse region of slip < 2 m. However, at these high degrees of smoothing, the model misfit ( $\beta = 1,024$  km<sup>2</sup>/m) is 5 times larger than in the preferred model ( $\beta = 32$  km<sup>2</sup>/m).



# Rupture of deep faults in the 2008 Wenchuan earthquake and uplift of the Longmen Shan

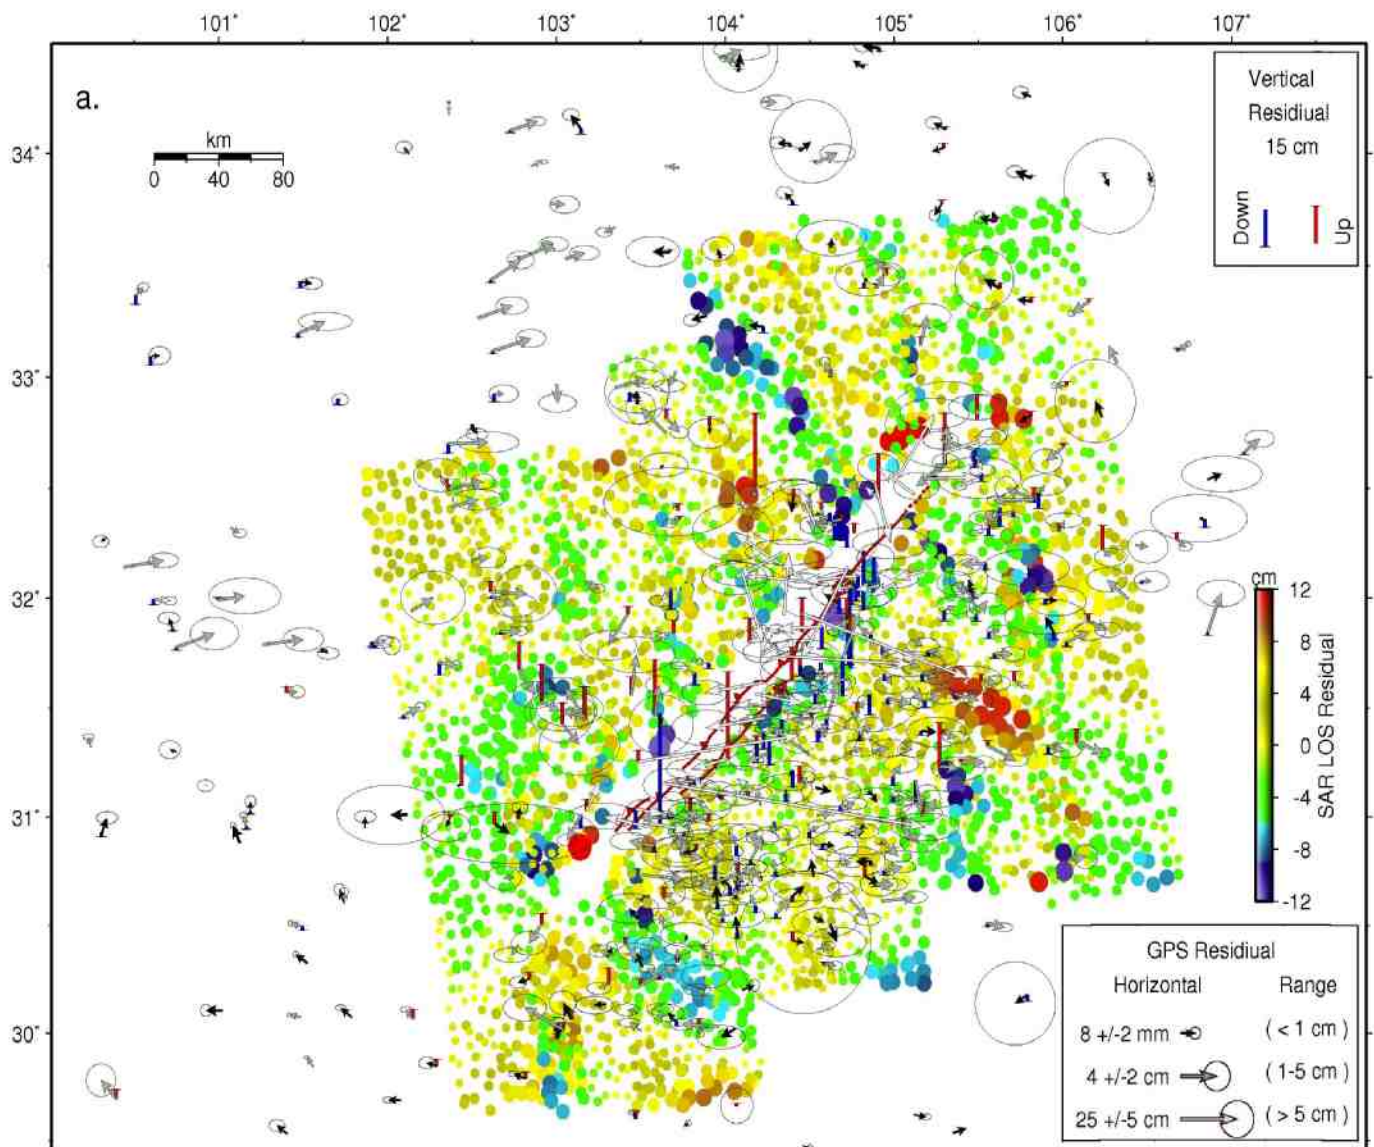

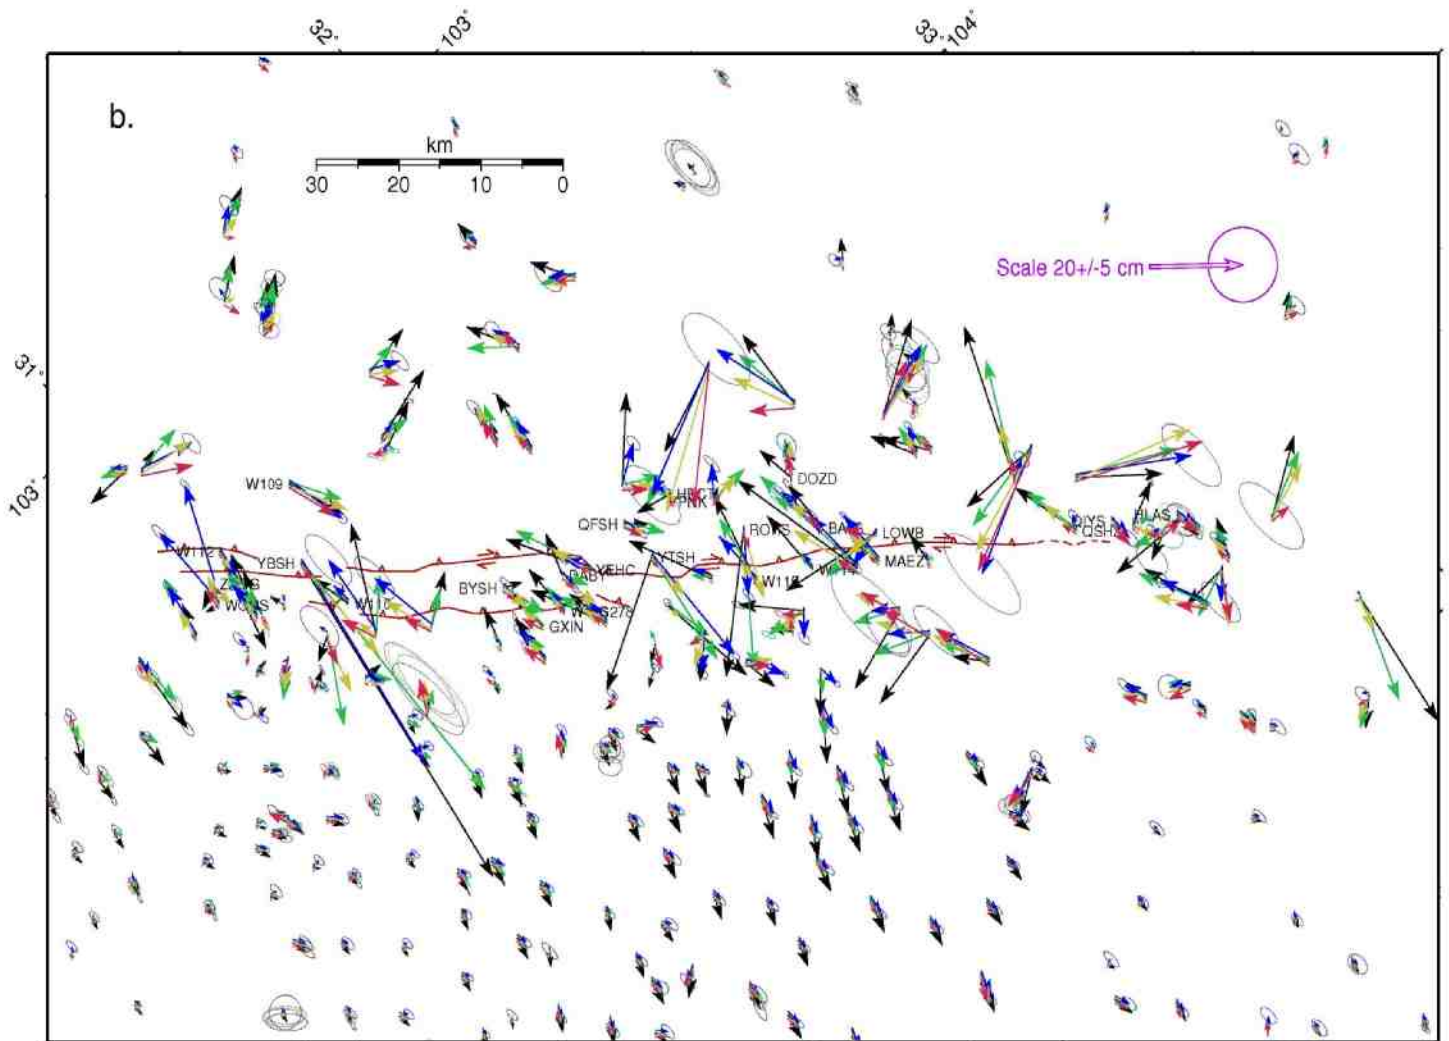

**Figure S11 | Model misfits to the coseismic displacements.**

**a**, Postfit residuals of our preferred model. Horizontal residuals are shown by scaled arrows with 95% confidence ellipses, and LOS offset misfits are shown by solid colored dots whose radii are proportional to misfit amplitudes and also scaled with the color bar. Vertical components of postfit residuals are shown with the blue bar for subsidence and the red bar for uplift. **b**, The near-field horizontal postfit residuals are defined by colored arrows. The black, green, yellow and red arrows represent models adopting smoothing weights of 2,048, 512, 128 and 32  $\text{km}^2/\text{m}$  respectively. The blue arrows represent the model with constraints from the surface offset measurements. The arrows of 4-char code sites are downscaled by a factor of 2 for clarity.

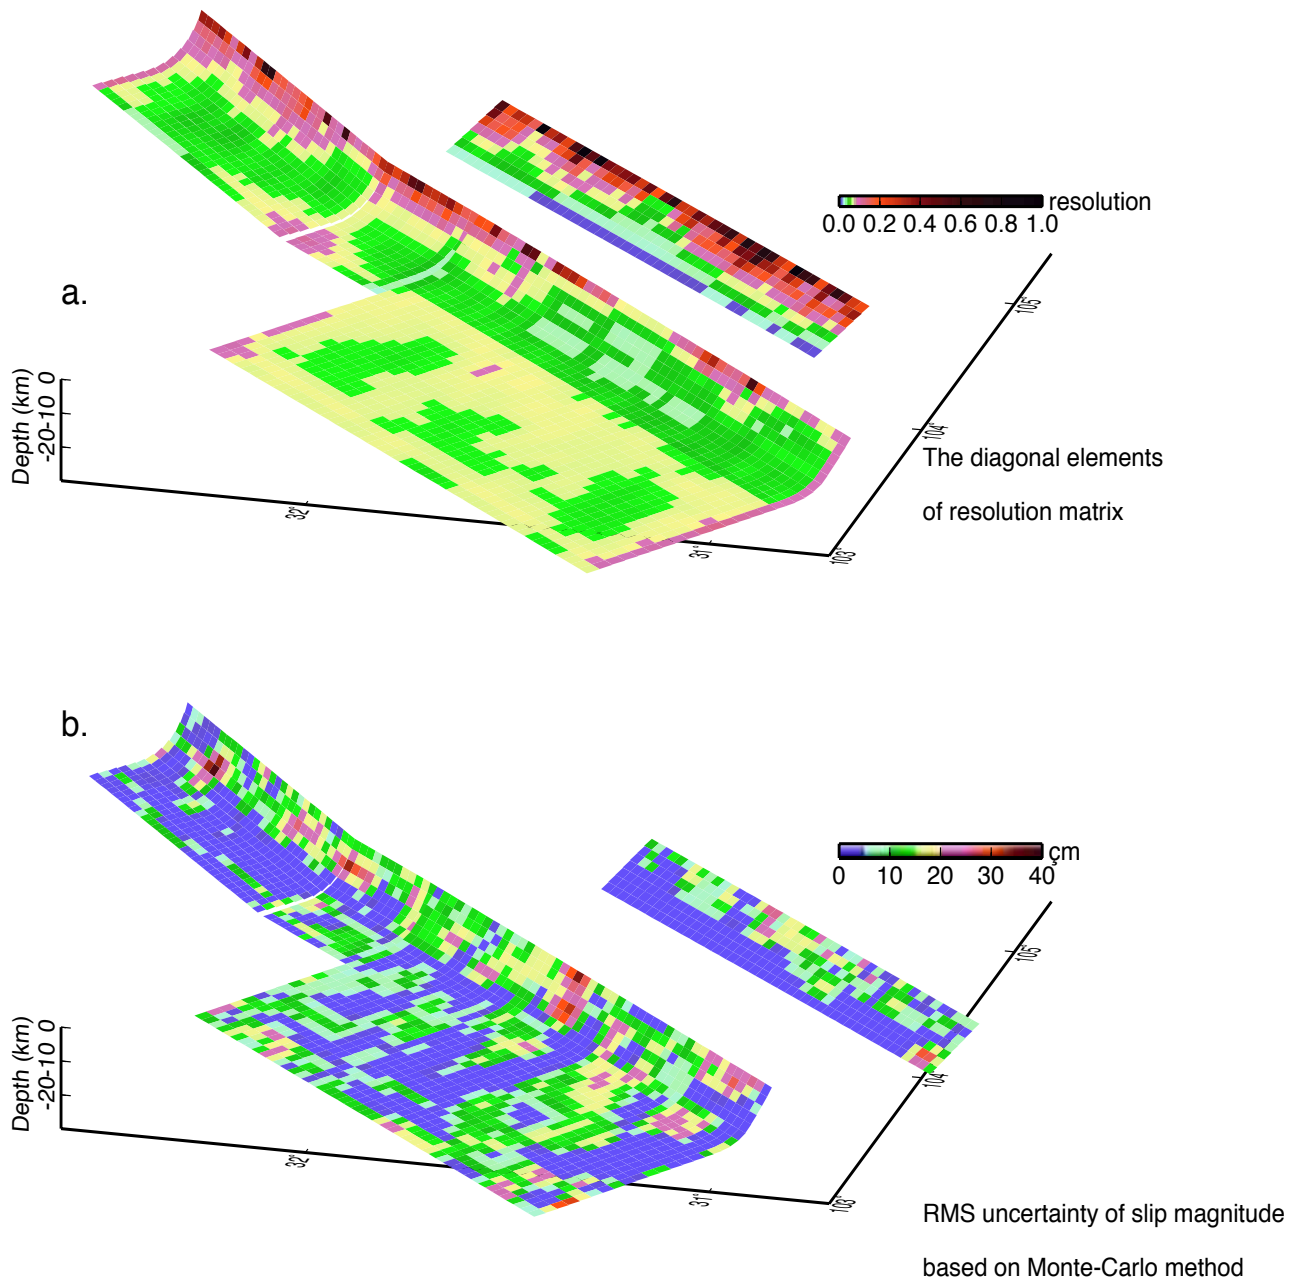

**Figure S12 | Resolution and uncertainty in the best-fitting source model.**

- a**, The diagonal elements of the model resolution matrix are projected on the 3D rupture plane.
- b**, Slip uncertainties ( $1\sigma$ ) of the subfault patches are displayed on the rupture plane based on 900 test models with boot-strap algorithm.

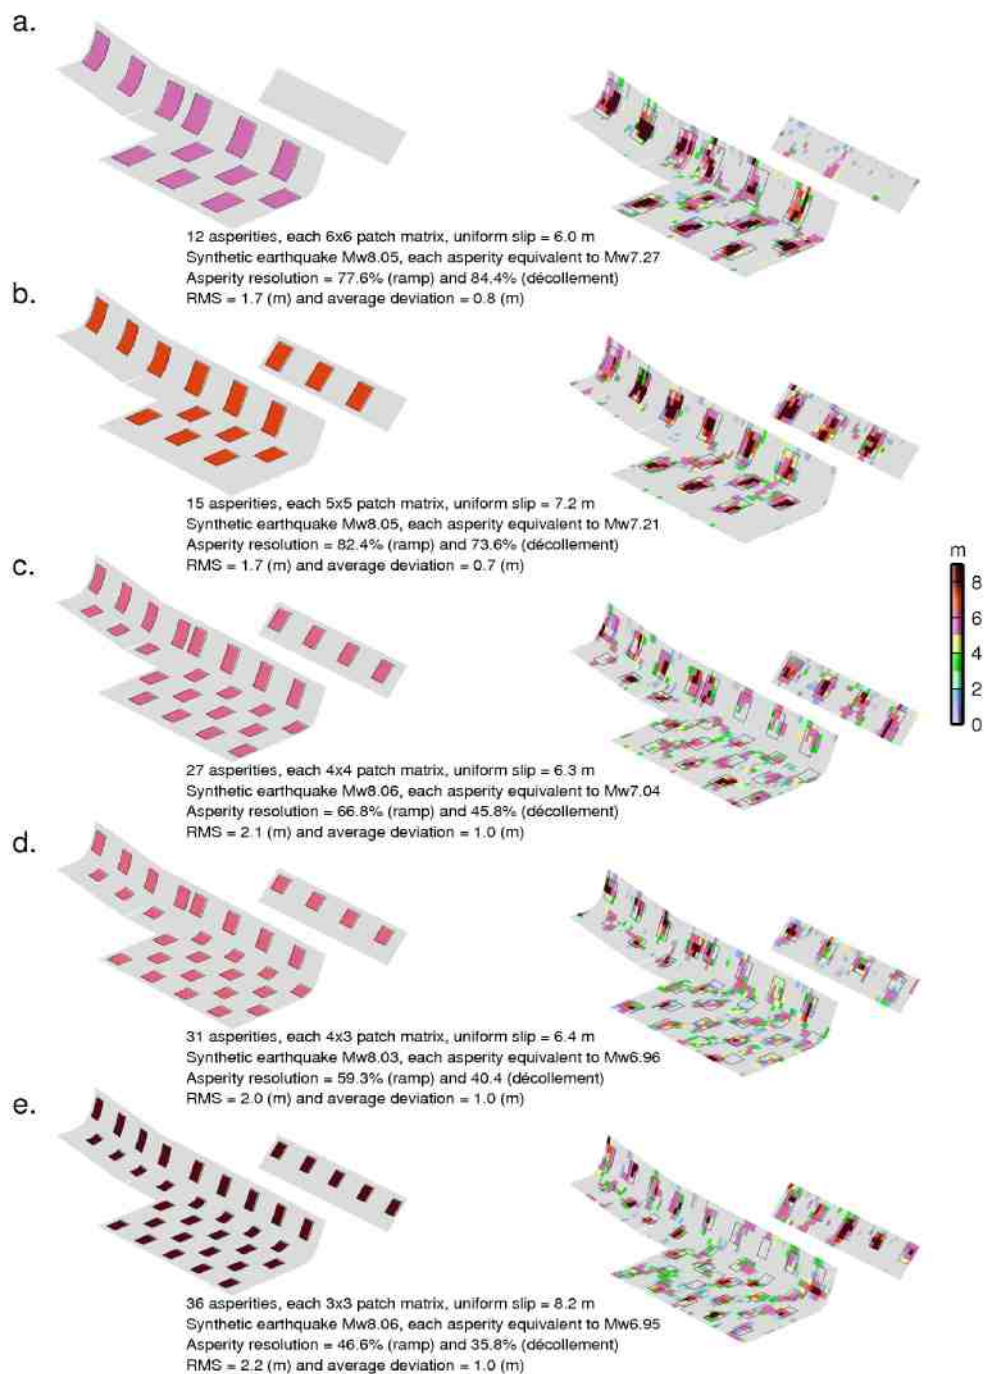

**Figure S13 | Checkerboard tests for variable dimensions of synthetic asperity.**

The colored boxes represent model asperities whose slip magnitude is shown in the inset color bar. The boxes outline the model asperities. **a.–e.** represent slip models with almost same seismic moment and corresponding retrieved slip patterns. The combined dataset can resolve asperities  $12 \times 16 \text{ km}^2$  in size on the ramp, or  $20 \times 20 \text{ km}^2$  on the décollement. Smaller asperities may be detected, but their slip would be spread over a larger area.



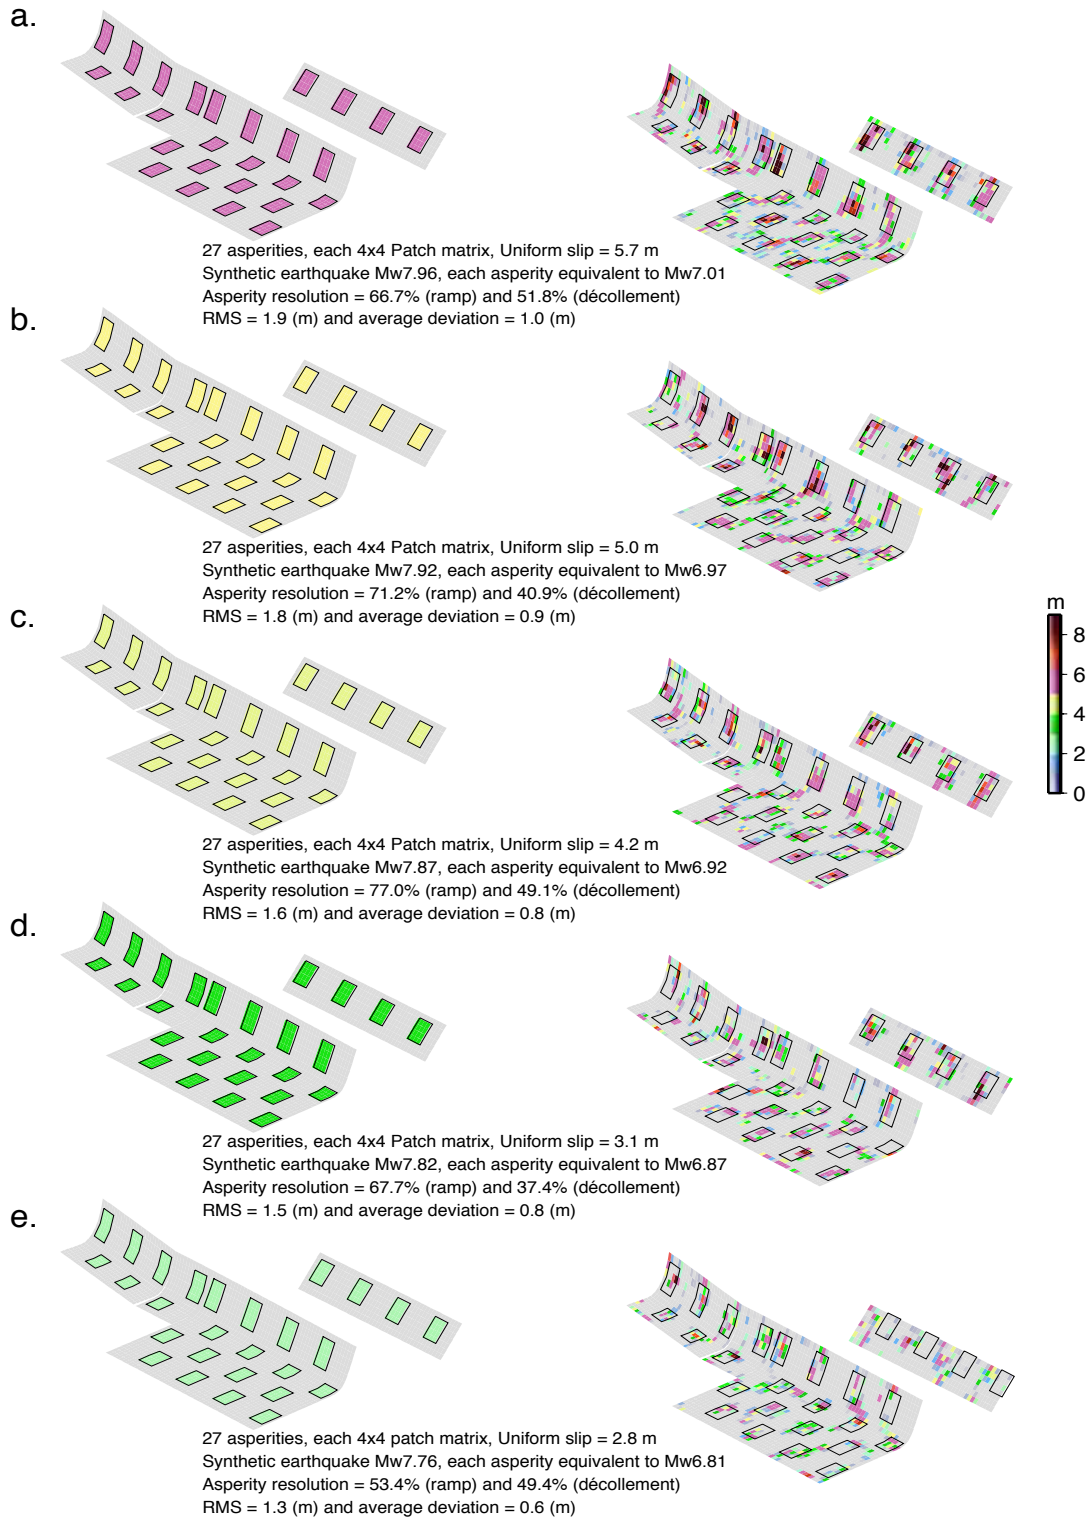

**Figure S14 | Checkerboard tests for 4x4 subfault matrix synthetic asperities**

The colored boxes represent model asperities whose slip magnitude are scaled according to the inset color bar. **a.-e.** represent source models with each asperity having some size but different input slip and corresponding retrieved slip distributions.

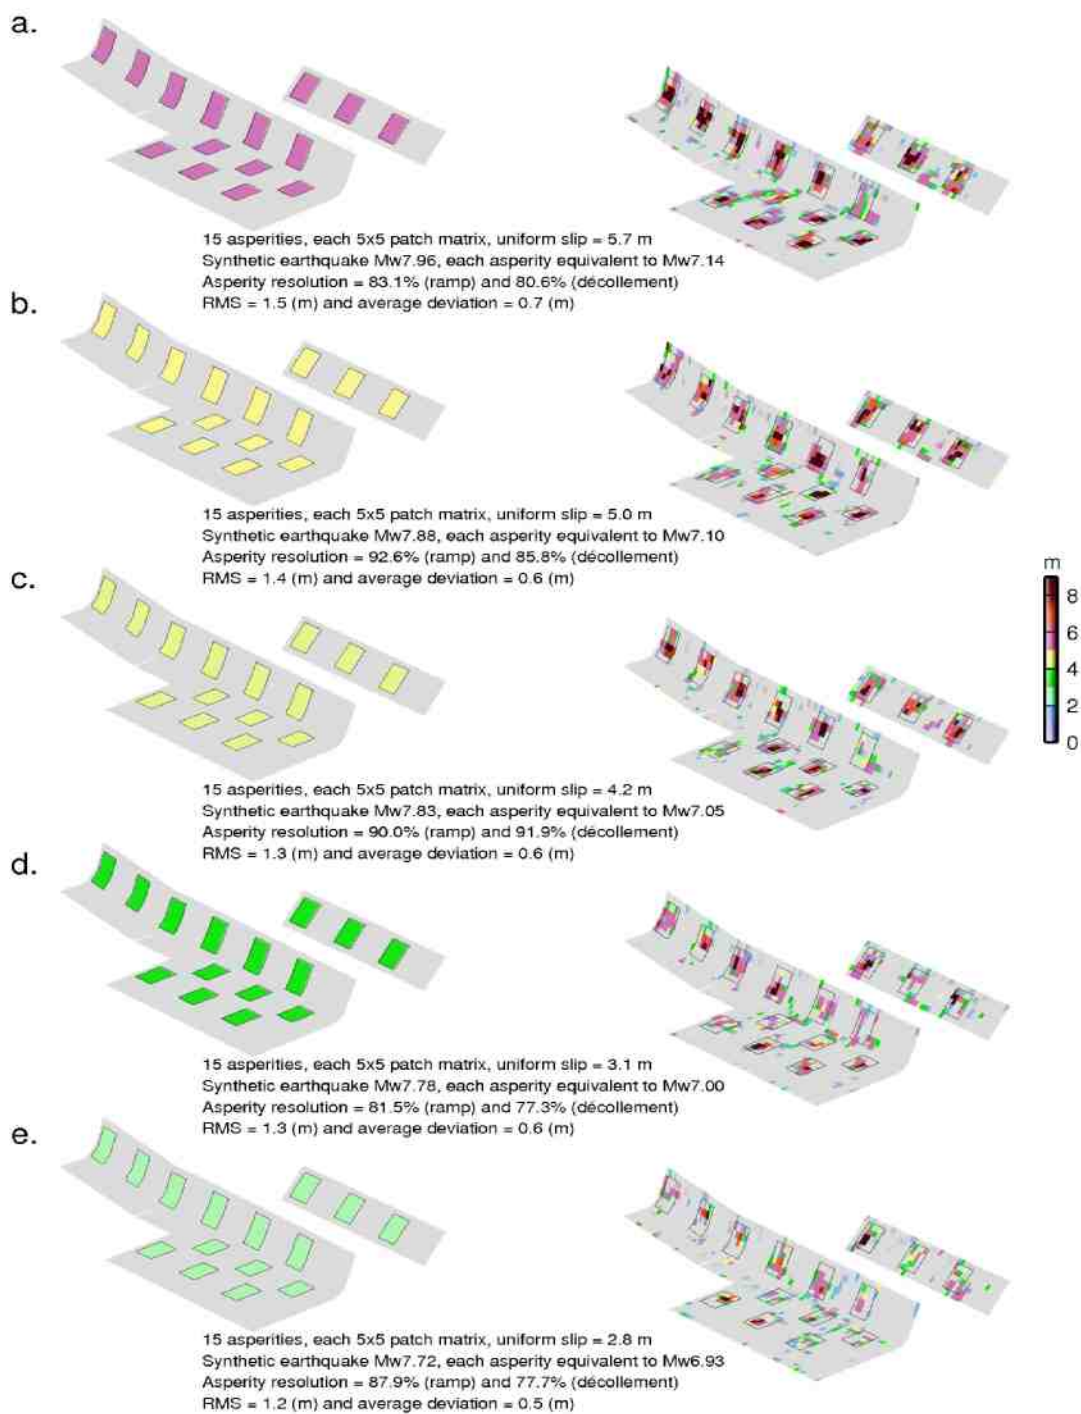

**Figure S15 | Checkerboard tests for 5x5 subfault matrix synthetic asperities**

The colored boxes represent model asperities whose slip magnitudes are scaled according to the inset color bar. **a.-e.** represent source models with each asperity having some size but different input slip and corresponding retrieved slip distributions.

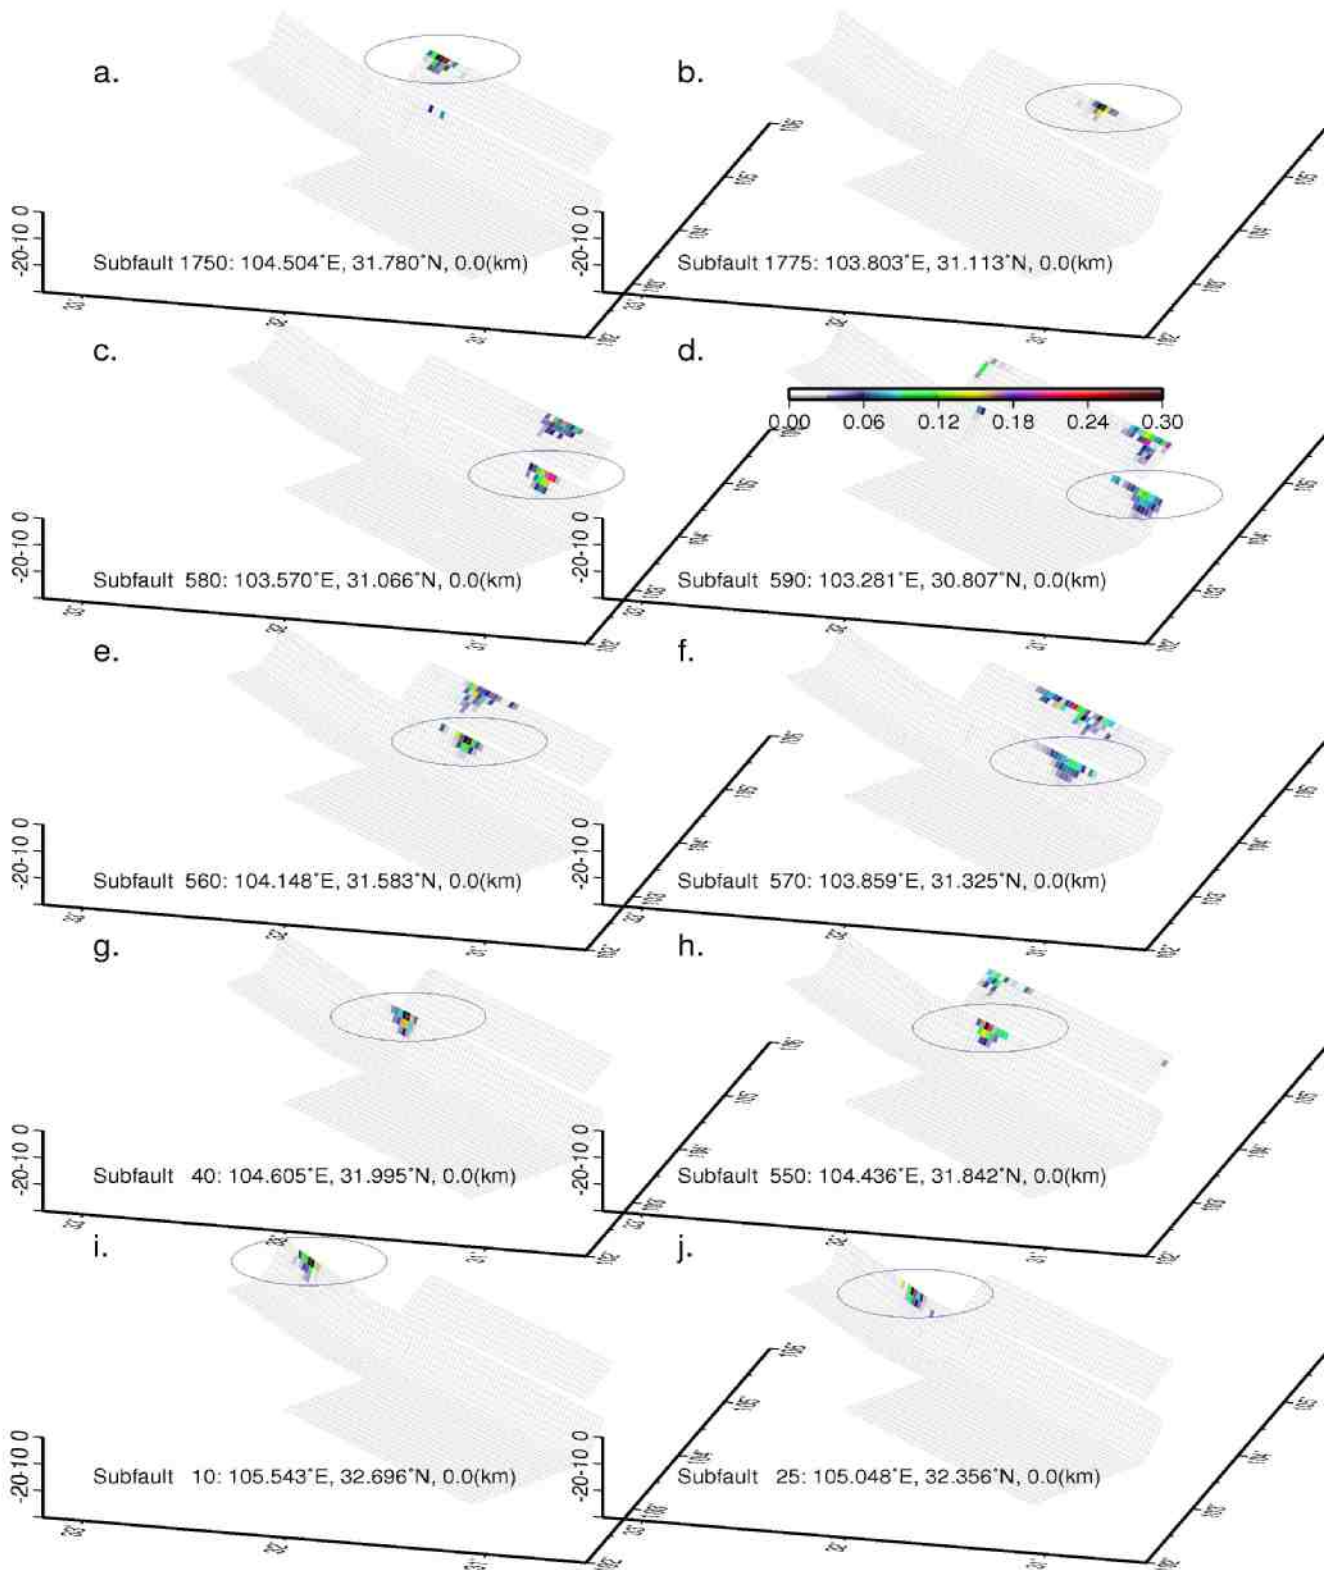

**Figure S16 | Resolution kernel of samples on the top row of subfault matrix**

The columns of the model resolution matrix from 8 samples (a.-j.) located on the top row of subfault matrix (Tab S2.) are projected onto the 3D rupture planes as shown in Fig S6b.



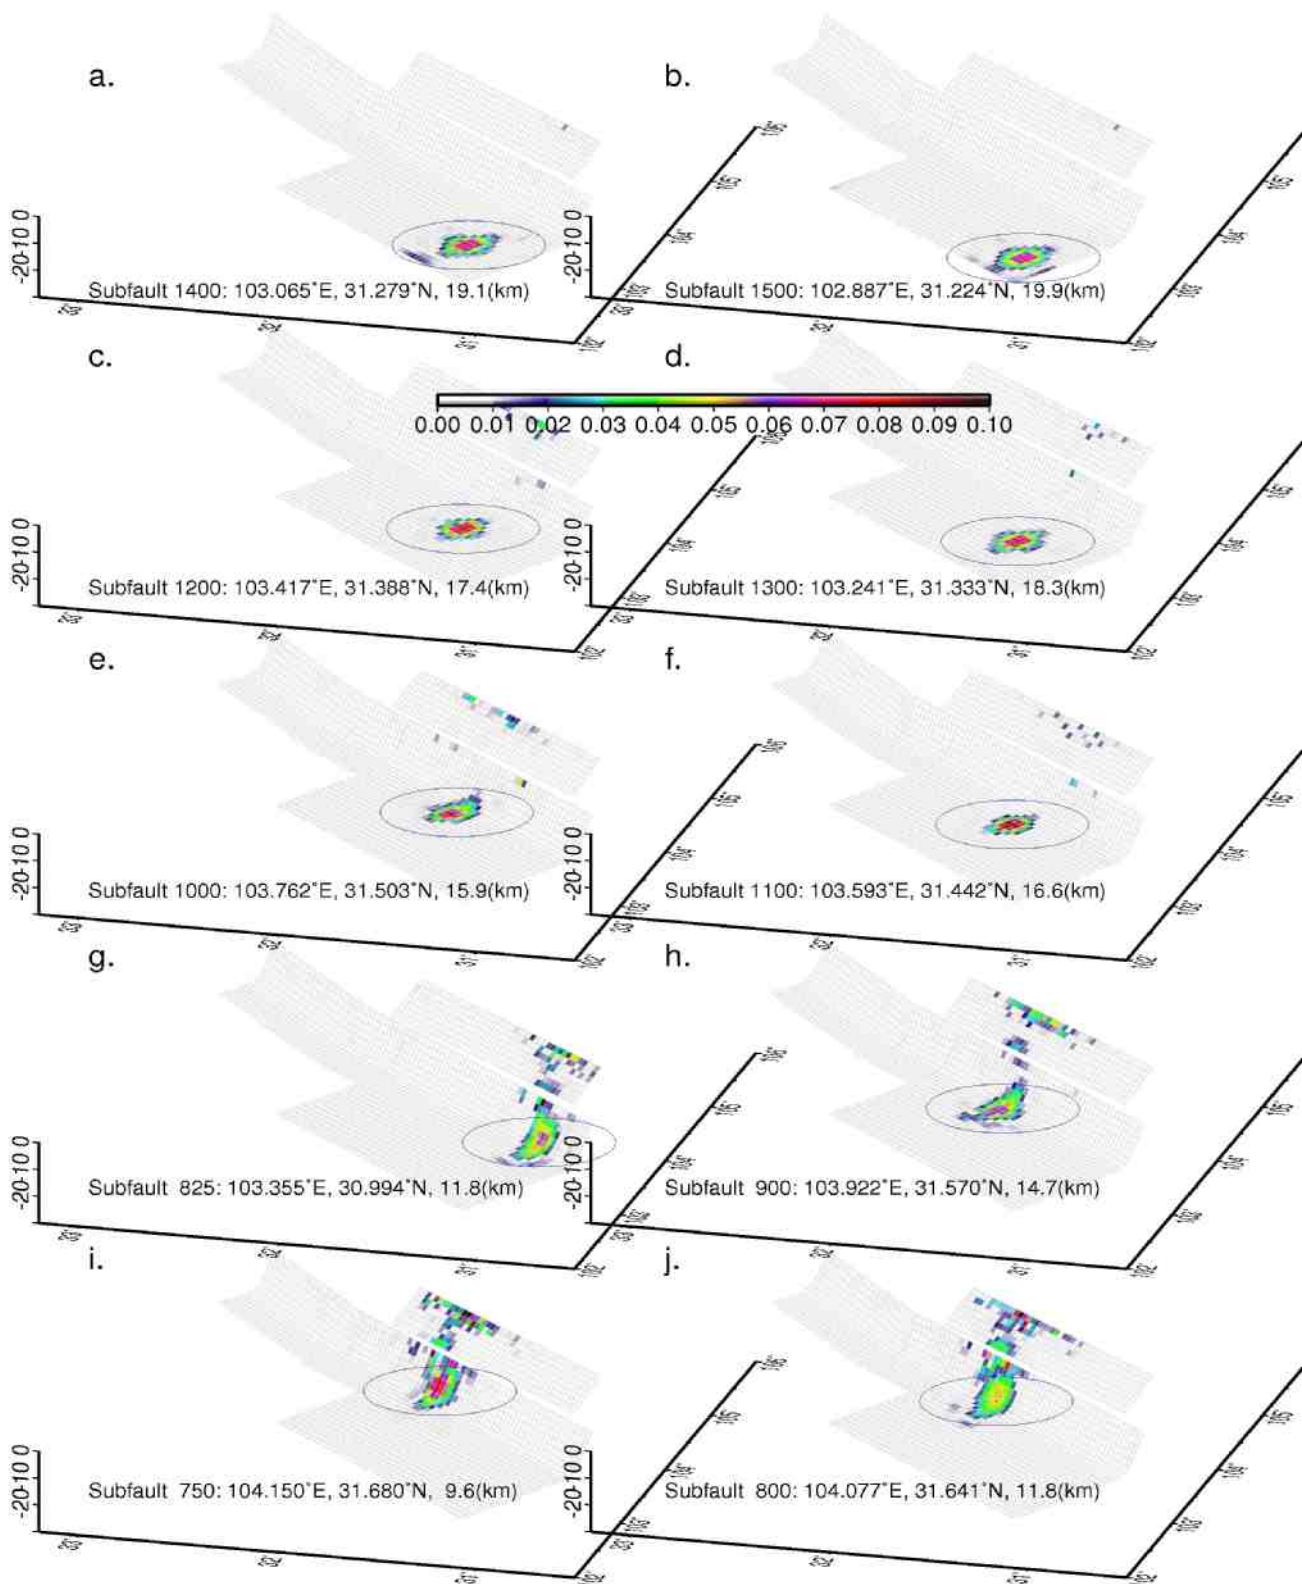

**Figure S17 | Resolution kernel of subfault samples on the ramp and décollement**

The columns of the model resolution matrix from 8 samples (a.-j.) located on the ramp and décollement faults (Tab S2.) are projected onto the 3D rupture planes.



## Rupture of deep faults in the 2008 Wenchuan earthquake and uplift of the Longmen Shan

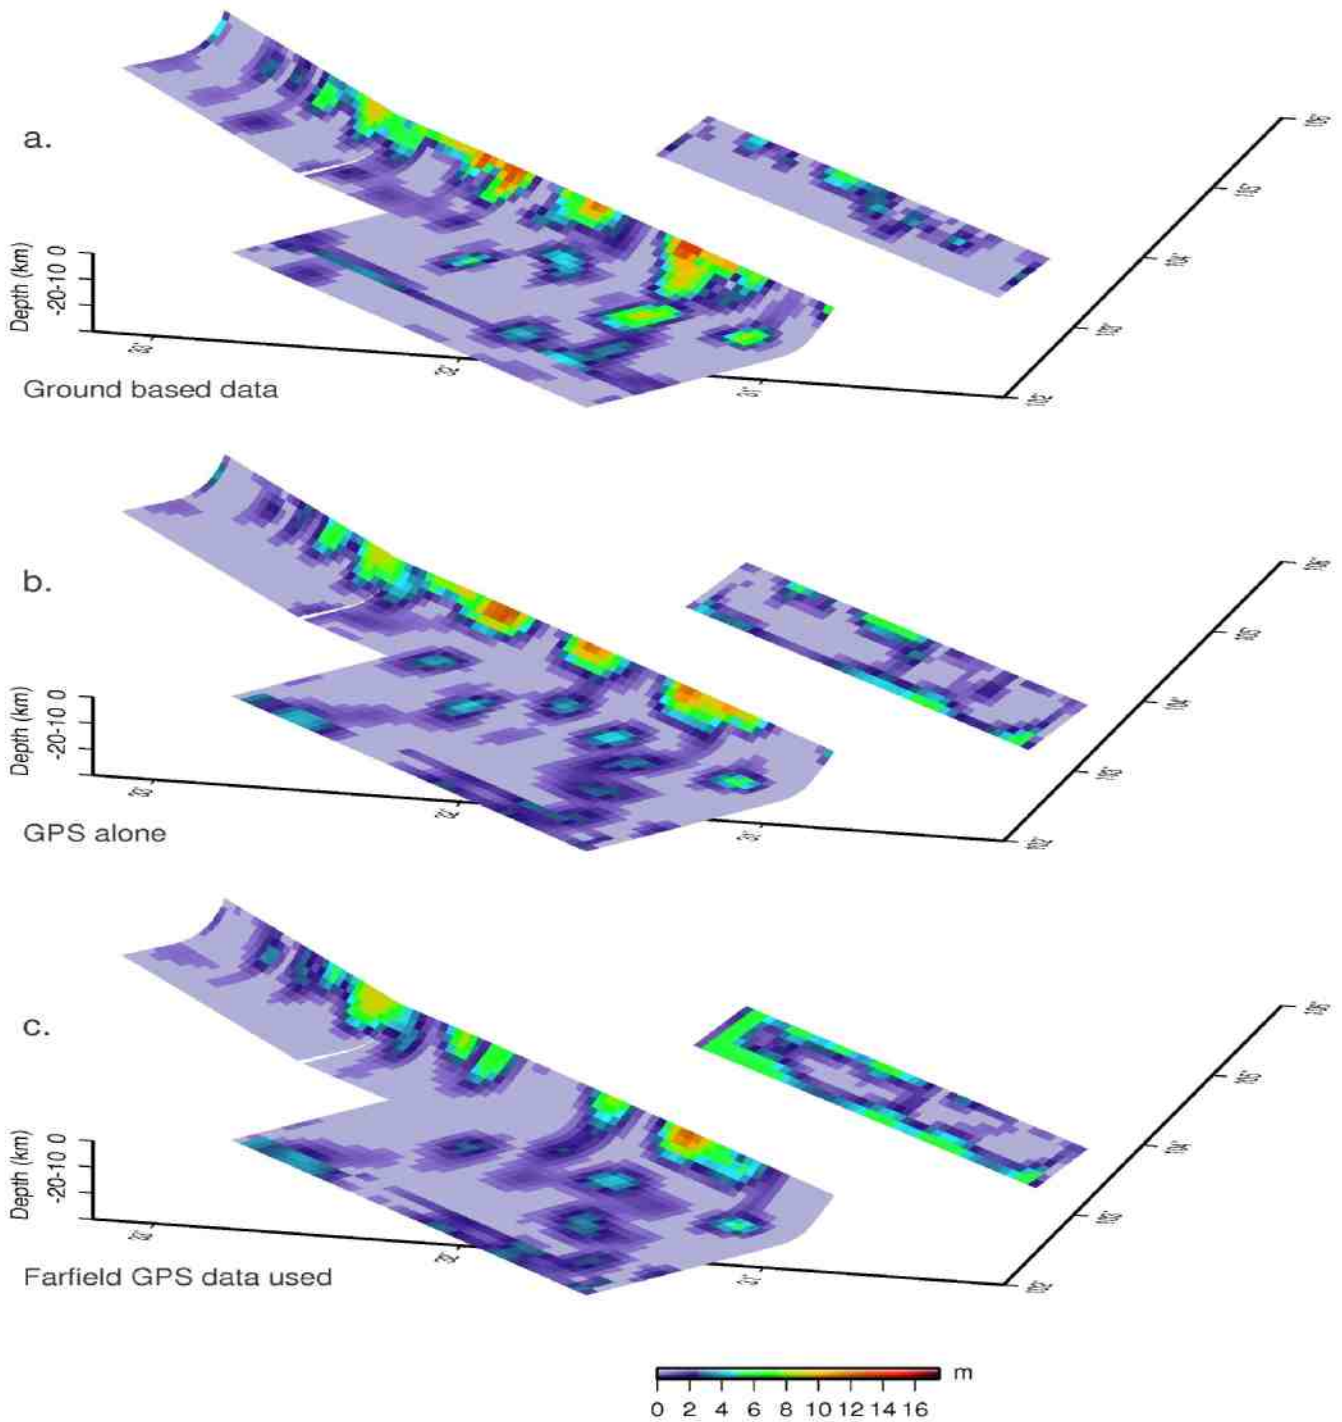

**Figure S18 | Slip model inverted from different sub-datasets**

**a**, The ground based geodetic data including GPS, triangulation and levelling are used. **b**, The geodetic sites that were initially surveyed with GPS prior to the earthquake are used. **c**, The GPS sites that are located 50 km away from the BCF are used.

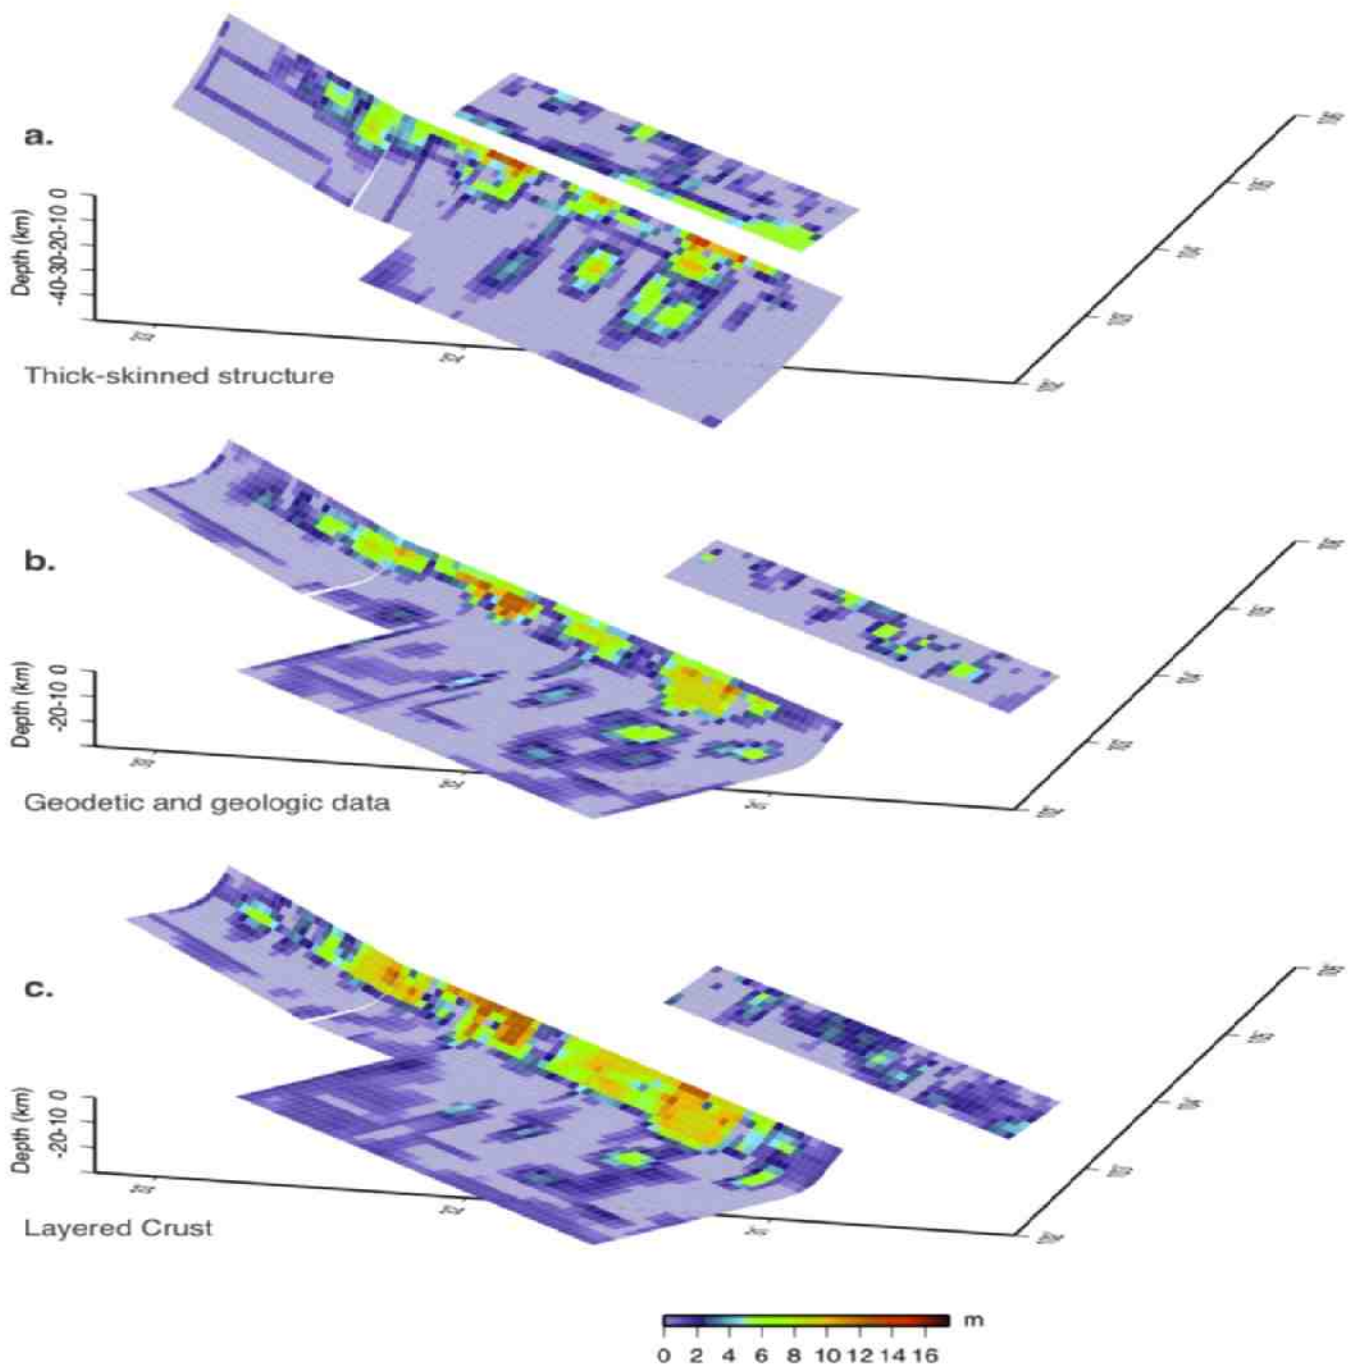

**Figure S19 | Slip models based on the consideration of a thick-skinned structure, surface breaks and a layered crust.**

**a,** The YX segment of the BCF dips  $55^\circ$  at the surface and  $38^\circ$  at depth of 45 km. The QC segment of the BCF and the PGF have a fixed dip angle of  $70^\circ$  and  $35^\circ$  respectively. **b,** Slip on the top row of the subfault matrix is constrained within the uncertainties of the geological data. **c,** The layered crust is based on the CRUST 2 model<sup>S60</sup>.

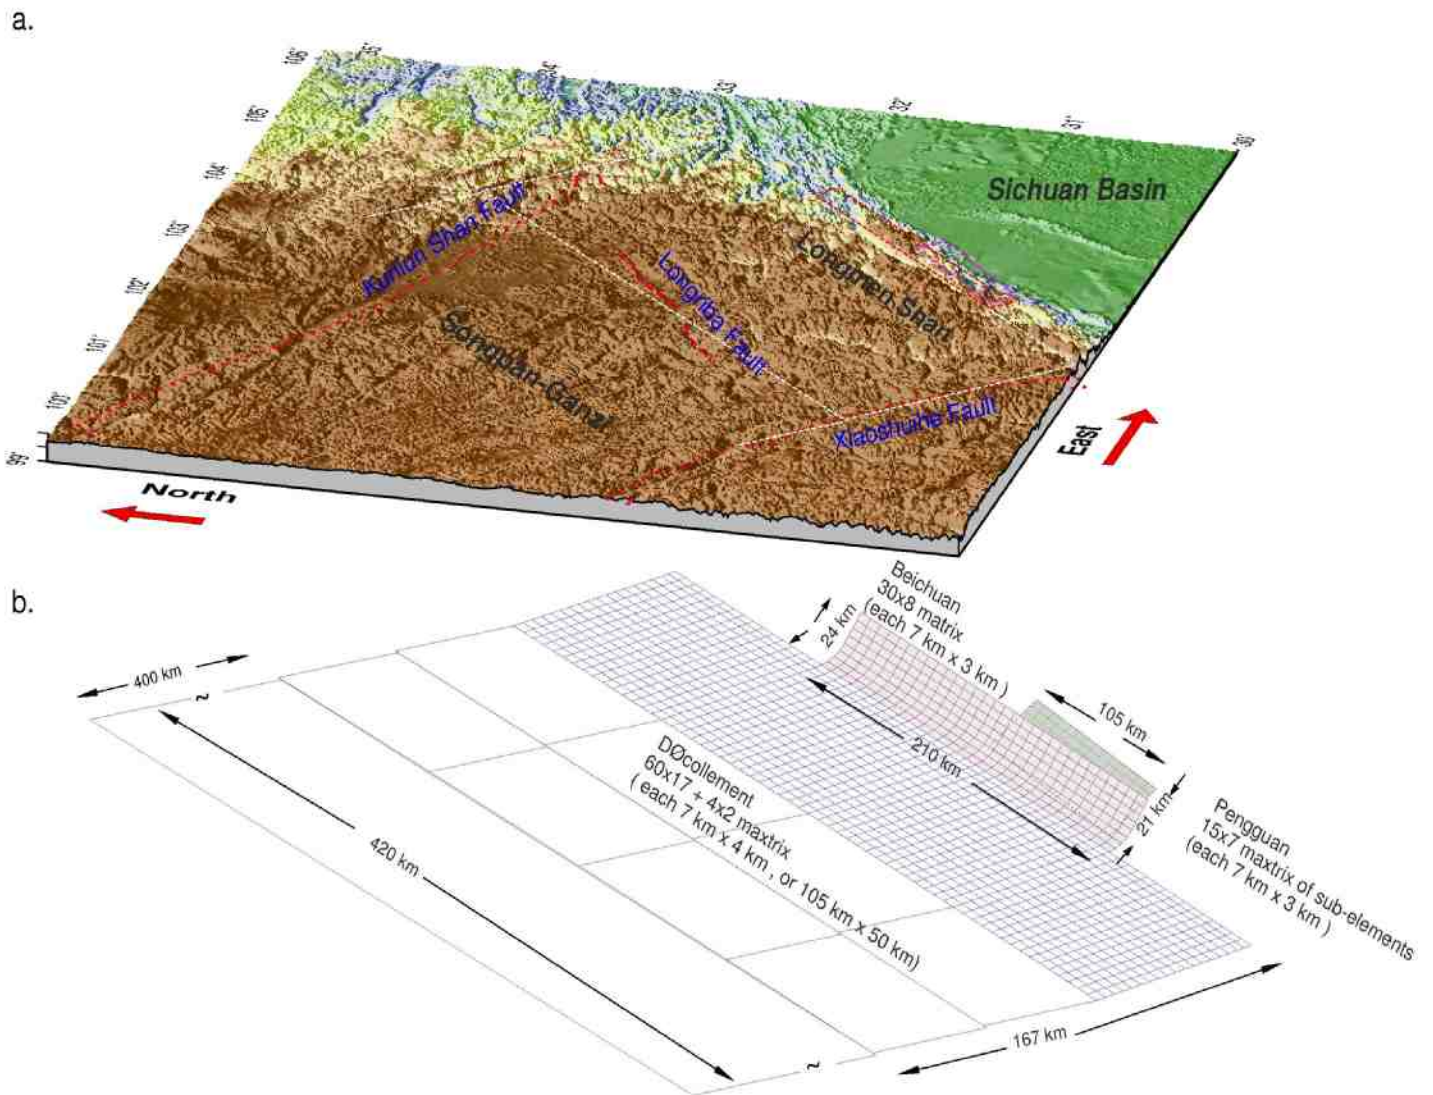

**Figure S20 | Boundary element mesh and active tectonics in east Tibet**

a, The red dash line denotes the three main strike-slip faults in eastern Tibet. The dashed white line outlines the surface project of boundary elements that slip on the décollement in the interseismic period. The pink and red dashed boxes mark the elements for the BCF and PGF, which are locked in the interseismic interval but slip during the earthquakes. b, the element dimension.

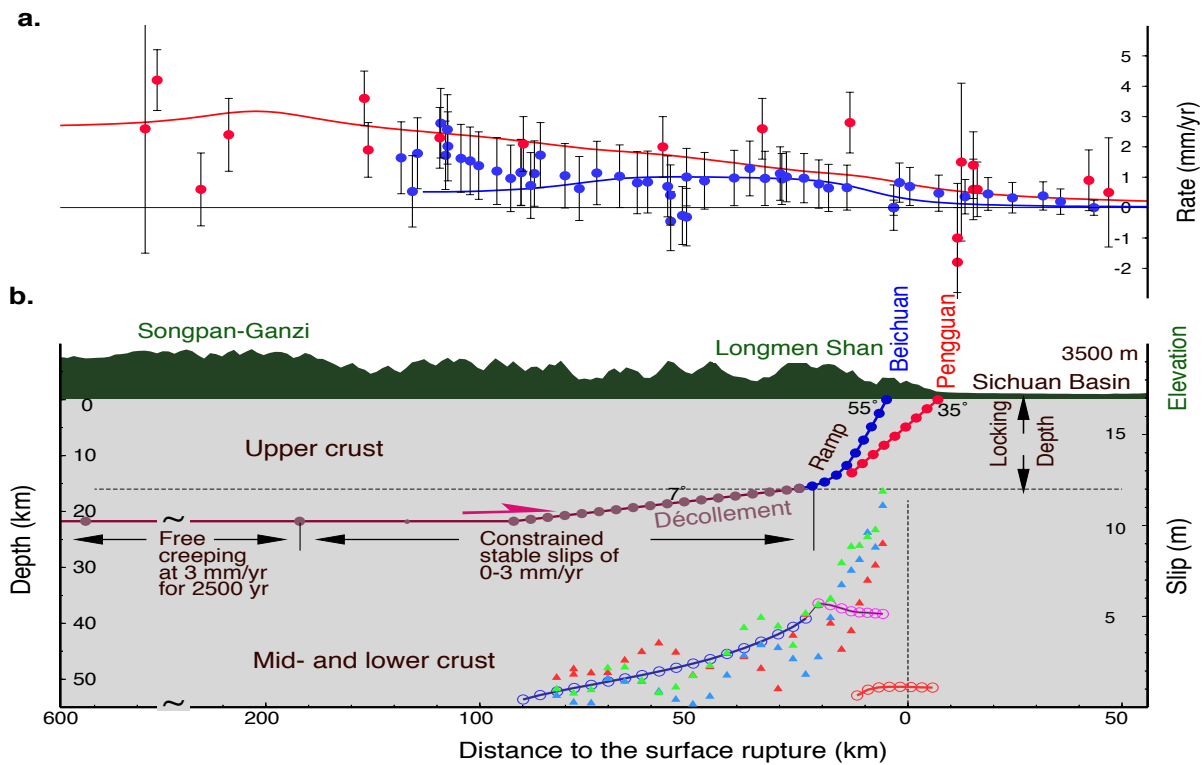

**Figure S21 | Boundary element model of interseismic deformation and slip behaviour during earthquake.**

**a**, The cross section in interseismic deformation normal to the Longmen Shan thrust. The red and blue dots with  $2\sigma$  error bars show the GPS-inferred horizontal displacements and levelling-determined uplift in a region bounded by the Kunlun Shan fault to the north and the Xianshuihe fault to the south (Fig. S22). The GPS vectors are projected to a direction normal to the Longmen Shan. The red and blue lines show the corresponding model rates from the boundary element model. **b**, Maximum earthquake slip versus distance normal to the fault. The synthetic slips shown by circles (blue for slip on the décollement and pink for the BCF, light red for the PGF) are predicted by an unrestrained model<sup>86</sup>, in which 2,500 years of stress accumulation due to tapering creep along the décollement is released by sudden slip on two updip ramps. The imposed loading of 3 mm/yr is verified by comparing the model predicted interseismic velocities with the surface velocities observed in the Longmen Shan and eastern Tibet by pre-earthquake spirit levelling and GPS measurements. The slip estimates (coloured solid triangles) are values averaged over the three maximum slips on subfaults at the same row within asperities: HK (green), QP (red) and BC (blue).



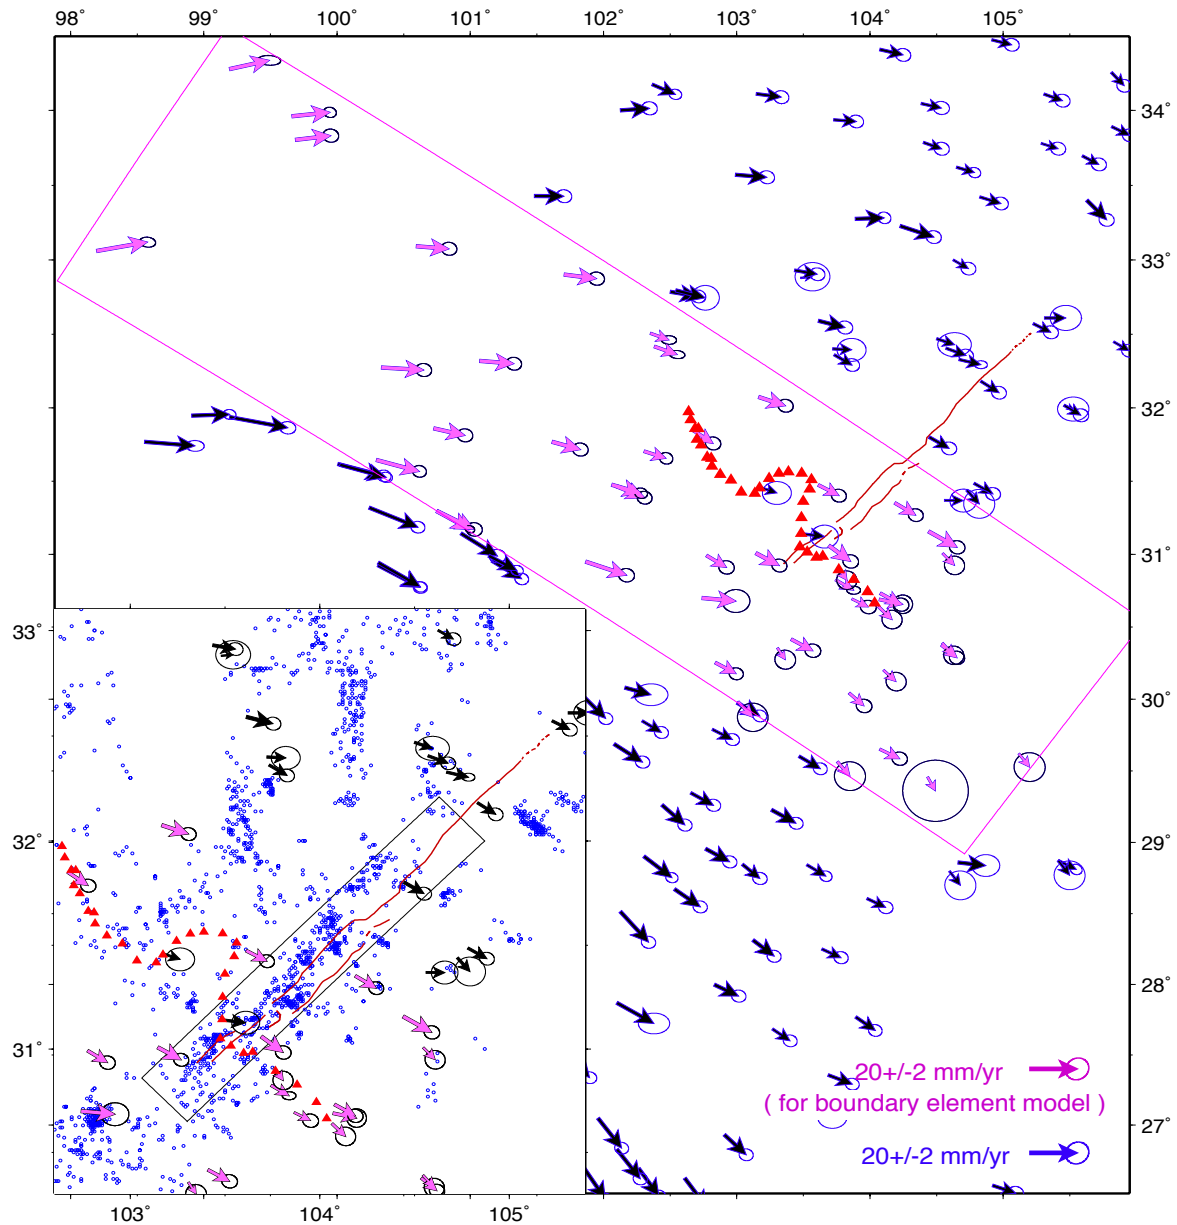

**Figure S22 | Regional seismicity and GPS-inferred interseismic displacement field.**

The red triangles mark levelling points for the boundary element modeling. The GPS displacement vectors with 95% confidence ellipses are shown. The pink arrows are used for the modeling. The lower left inset show relocated micro-earthquakes (blue dots) in 1992-2002. The earthquakes in the black box are plotted in Fig. 3b, and used to infer an averaged rate of seismic slip along the middle segment of the BCF .

# Rupture of deep faults in the 2008 Wenchuan earthquake and uplift of the Longmen Shan

#  
# **Table S1| Ground-based measurements of surface displacement for the 2008 Wenchuan ( $M_w$ 7.9) earthquake**  
#

# Continuous GPS (38 stations )

| # | Long.   | Lat.   | EW      | SN     | Sew   | Sns   | coff.  | Name | Up      | Sup   | Agency |
|---|---------|--------|---------|--------|-------|-------|--------|------|---------|-------|--------|
| # | deg     | deg    | cm      | cm     | cm    | cm    |        |      | cm      | cm    |        |
| # |         |        |         |        |       |       |        |      |         |       |        |
|   | 110.350 | 31.049 | -0.512  | 0.371  | 0.140 | 0.138 | 0.018  | BADN | -2.900  | 0.520 | IOS    |
|   | 106.850 | 29.302 | -1.579  | 0.577  | 0.310 | 0.257 | 0.019  | BNSL | -0.620  | 0.701 | CQEA   |
|   | 104.064 | 30.639 | -15.934 | 11.643 | 0.253 | 0.241 | 0.012  | CHDU | -0.152  | 0.519 | SCEA   |
|   | 103.661 | 30.995 | -96.100 | 69.300 | 0.24  | 0.20  | 0.030  | DUJY | -15.100 | 1.800 | SCEA   |
|   | 107.403 | 30.368 | -2.288  | 0.614  | 0.253 | 0.242 | 0.001  | DJXM | 1.108   | 0.528 | CQEA   |
|   | 108.015 | 29.815 | -1.441  | 0.337  | 0.257 | 0.243 | 0.004  | FDLH | 1.423   | 0.533 | CQEA   |
|   | 109.119 | 31.105 | -1.552  | 0.195  | 0.261 | 0.243 | -0.012 | FJHT | 0.354   | 0.560 | CQEA   |
|   | 109.444 | 30.666 | -1.103  | 0.104  | 0.253 | 0.242 | -0.009 | FJXL | 1.039   | 0.532 | SCEA   |
|   | 110.748 | 31.341 | -0.391  | 0.141  | 0.14  | 0.138 | -0.001 | GUFU | 1.600   | 0.510 | IOS    |
|   | 102.267 | 27.796 | -0.412  | -0.323 | 0.311 | 0.201 | 0.019  | GYAO | 5.100   | 0.412 | SCEA   |
|   | 106.367 | 30.106 | -2.410  | 0.722  | 0.254 | 0.242 | 0.005  | HCYT | 1.167   | 0.527 | CQEA   |
|   | 105.413 | 28.872 | -1.415  | -0.151 | 0.051 | 0.050 | 0.001  | LUZH | -0.410  | 0.105 | CMONOC |
|   | 106.254 | 29.182 | -1.051  | 0.456  | 0.256 | 0.244 | 0.013  | JJML | 0.619   | 0.532 | CQEA   |
|   | 104.544 | 30.388 | -7.642  | 4.144  | 0.252 | 0.241 | 0.012  | JYAN | 0.802   | 0.519 | SCEA   |
|   | 102.112 | 27.882 | 0.101   | -0.291 | 0.323 | 0.221 | 0.038  | KAIY | -1.802  | 0.560 | SCEA   |
|   | 108.166 | 31.078 | -1.788  | 0.422  | 0.253 | 0.242 | -0.004 | KXLJ | 1.412   | 0.529 | CQEA   |
|   | 103.755 | 29.564 | -1.107  | 0.064  | 0.076 | 0.057 | 0.011  | LESH | -0.761  | 0.162 | SCEA   |
|   | 107.862 | 30.770 | -2.050  | 0.404  | 0.255 | 0.242 | -0.001 | LPFP | 0.474   | 0.531 | CQEA   |
|   | 101.745 | 30.600 | 4.251   | 0.521  | 0.112 | 0.101 | 0.033  | MAON | 0.600   | 0.532 | SCEA   |
|   | 103.134 | 28.335 | -0.229  | -0.252 | 0.132 | 0.122 | 0.021  | MEIG | -0.860  | 0.630 | SCEA   |
|   | 101.744 | 30.599 | 3.932   | -0.056 | 0.081 | 0.066 | 0.028  | MNIU | -1.516  | 0.163 | SCEA   |
|   | 104.726 | 31.440 | -30.195 | 6.168  | 0.075 | 0.075 | 0.026  | MYAN | -1.193  | 0.148 | SCEA   |
|   | 105.118 | 29.620 | -2.061  | 0.689  | 0.076 | 0.057 | 0.005  | NEIJ | 0.347   | 0.162 | SCEA   |
|   | 103.756 | 30.910 | -56.424 | 42.160 | 0.074 | 0.056 | -0.001 | PIXI | -8.258  | 0.151 | SCEA   |

|         |        |         |        |       |       |        |      |        |       |        |
|---------|--------|---------|--------|-------|-------|--------|------|--------|-------|--------|
| 101.184 | 31.022 | 4.350   | -0.697 | 0.076 | 0.065 | 0.009  | QIME | -1.188 | 0.149 | SCEA   |
| 103.305 | 30.354 | -1.493  | -0.641 | 0.092 | 0.065 | -0.022 | QLAI | -3.833 | 0.232 | SCEA   |
| 105.350 | 29.533 | -2.162  | 0.878  | 0.255 | 0.243 | 0.013  | RCPL | 0.256  | 0.527 | CQEA   |
| 104.102 | 30.200 | -5.074  | 3.595  | 0.071 | 0.055 | 0.002  | RENS | -0.611 | 0.139 | SCEA   |
| 104.433 | 29.457 | -1.324  | 0.571  | 0.071 | 0.055 | 0.004  | ROXI | -0.543 | 0.140 | SCEA   |
| 101.525 | 30.326 | 1.895   | -0.362 | 0.073 | 0.065 | 0.015  | TAGO | -1.124 | 0.145 | SCEA   |
| 103.010 | 29.981 | -0.611  | -0.632 | 0.257 | 0.242 | 0.021  | YAAN | -0.646 | 0.524 | SCEA   |
| 108.460 | 30.752 | -1.442  | 0.406  | 0.254 | 0.242 | -0.007 | WANZ | 1.117  | 0.530 | CQEA   |
| 101.125 | 30.881 | 3.372   | -0.197 | 0.062 | 0.051 | -0.008 | WARI | 0.251  | 0.125 | SCEA   |
| 109.842 | 31.024 | -1.441  | 0.184  | 0.252 | 0.242 | -0.009 | WSJP | 0.955  | 0.528 | CQEA   |
| 102.348 | 27.809 | 0.211   | -0.358 | 0.124 | 0.119 | 0.026  | XICH | -2.000 | 0.537 | SCEA   |
| 108.985 | 34.178 | -0.306  | -0.743 | 0.199 | 0.150 | -0.007 | XIAA | 3.510  | 0.641 | CMONOC |
| 104.596 | 28.798 | -0.784  | 0.242  | 0.253 | 0.244 | 0.024  | YBIN | 1.303  | 0.521 | SCEA   |
| 104.545 | 31.006 | -20.185 | 6.901  | 0.063 | 0.052 | -0.005 | ZHJI | -0.553 | 0.126 | SCEA   |

#

# Campaign GPS ( 435 sites )

#

#

| #       | Long.<br>deg | Lat.<br>deg | EW<br>cm | SN<br>cm | Sew<br>cm | Sns<br>cm | coff.  | Name | Up<br>cm | Sup<br>cm | Resurvey<br>Date | Agencies<br>Pre-, Post-<br>Earthquake |
|---------|--------------|-------------|----------|----------|-----------|-----------|--------|------|----------|-----------|------------------|---------------------------------------|
| #       |              |             |          |          |           |           |        |      |          |           |                  |                                       |
| 106.584 | 33.163       |             | -0.630   | 0.171    | 0.202     | 0.165     | -0.022 | 0034 | -4.678   | 0.395     | 30-may-2008      | SXSM SXSM                             |
| 105.814 | 33.339       |             | 0.317    | 3.774    | 0.210     | 0.167     | -0.021 | 1375 | -4.389   | 0.425     | 30-may-2008      | SXSM SXSM                             |
| 107.075 | 33.081       |             | -0.540   | -1.094   | 0.206     | 0.166     | -0.028 | 1381 | 0.000    | 0.407     | 30-may-2008      | SXSM SXSM                             |
| 106.233 | 32.820       |             | -5.151   | 0.955    | 0.222     | 0.171     | -0.017 | 1387 | -3.067   | 0.428     | 30-may-2008      | SXSM SXSM                             |
| 102.726 | 34.103       |             | 4.867    | -0.917   | 0.219     | 0.121     | 0.024  | 2008 | -1.374   | 0.452     | 17-aug-2008      | SCSM SCSM                             |
| 102.359 | 32.494       |             | 12.272   | -4.926   | 0.253     | 0.150     | 0.003  | 2016 | 2.745    | 0.507     | 23-jun-2008      | SCSM SCSM                             |
| 103.652 | 32.814       |             | 9.914    | -5.414   | 0.207     | 0.114     | -0.082 | 2017 | 3.599    | 0.391     | 30-may-2008      | SCSM SCSM                             |
| 104.692 | 32.359       |             | 68.276   | 24.748   | 0.199     | 0.109     | -0.009 | 2020 | -3.428   | 0.375     | 30-may-2008      | SCSM SCSM                             |
| 105.832 | 32.451       |             | -18.600  | 3.572    | 0.232     | 0.174     | -0.019 | 2021 | 1.465    | 0.453     | 30-may-2008      | SCSM SCSM                             |
| 105.466 | 32.030       |             | -23.589  | 4.220    | 0.235     | 0.175     | -0.021 | 2022 | 2.040    | 0.462     | 30-may-2008      | SCSM SCSM                             |
| 106.675 | 32.266       |             | -4.602   | -0.570   | 0.170     | 0.101     | -0.006 | 2023 | 3.713    | 0.320     | 01-jul-2008      | SCSM SCSM                             |
| 102.372 | 31.000       |             | 16.392   | -1.494   | 0.239     | 0.139     | -0.015 | 2031 | -1.397   | 0.474     | 01-jun-2008      | SCSM SCSM                             |
| 103.586 | 31.474       |             | 95.229   | 2.265    | 0.175     | 0.107     | -0.034 | 2032 | 11.048   | 0.358     | 20-jun-2008      | SCSM SCSM                             |
| 103.090 | 30.063       |             | -1.366   | -0.731   | 0.227     | 0.172     | -0.004 | 2033 | -0.933   | 0.447     | 01-jun-2008      | SCSM SCSM                             |
| 105.071 | 31.080       |             | -10.713  | 2.550    | 0.226     | 0.172     | -0.014 | 2037 | 2.860    | 0.443     | 01-jun-2008      | SCSM SCSM                             |
| 106.081 | 31.342       |             | -4.573   | 0.260    | 0.191     | 0.108     | -0.025 | 2038 | 6.474    | 0.349     | 07-jul-2008      | SCSM SCSM                             |
| 103.639 | 30.623       |             | -11.399  | 11.478   | 0.227     | 0.172     | -0.001 | 2049 | -3.666   | 0.446     | 01-jun-2008      | SCSM SCSM                             |
| 105.553 | 30.510       |             | -3.999   | 1.025    | 0.231     | 0.122     | 0.020  | 2052 | -1.315   | 0.406     | 01-jun-2008      | SCSM SCSM                             |
| 105.878 | 34.524       |             | 0.459    | 1.361    | 0.556     | 0.249     | -0.017 | C109 | -1.467   | 0.878     | 02-jun-2008      | SXSM SXSM                             |
| 105.604 | 33.695       |             | 0.376    | 3.033    | 0.502     | 0.260     | 0.017  | C113 | -2.007   | 0.967     | 03-jun-2008      | SXSM SXSM                             |

|         |        |         |         |       |       |        |      |         |       |             |        |      |
|---------|--------|---------|---------|-------|-------|--------|------|---------|-------|-------------|--------|------|
| 104.447 | 34.010 | 0.897   | 0.127   | 0.434 | 0.226 | 0.036  | C123 | 2.993   | 0.841 | 02-jun-2008 | SXSM   | SXSM |
| 104.817 | 34.380 | -1.053  | 0.359   | 0.423 | 0.230 | -0.001 | C125 | -6.209  | 0.771 | 02-jun-2008 | SXSM   | SXSM |
| 104.404 | 34.783 | -0.740  | -0.834  | 0.457 | 0.250 | 0.081  | C131 | -1.867  | 0.841 | 01-jun-2008 | SXSM   | SXSM |
| 104.078 | 34.364 | 0.222   | 0.153   | 0.382 | 0.206 | -0.026 | C140 | -2.013  | 0.650 | 02-jun-2008 | SXSM   | SXSM |
| 102.150 | 30.066 | 0.706   | -0.075  | 0.146 | 0.081 | -0.015 | CP02 | 2.425   | 0.311 | 03-jun-2008 | SCEA   | SCEA |
| 101.406 | 29.530 | 0.224   | -0.507  | 0.198 | 0.112 | 0.215  | CP03 | -0.282  | 0.459 | 18-aug-2008 | SCEA   | SCEA |
| 101.492 | 29.342 | 0.656   | -1.237  | 0.166 | 0.096 | -0.031 | CP04 | -8.023  | 0.379 | 18-aug-2008 | SCEA   | SCEA |
| 101.470 | 29.173 | 4.159   | 3.618   | 0.882 | 0.281 | 0.160  | CP05 | -19.323 | 1.276 | 18-aug-2008 | SCEA   | SCEA |
| 102.039 | 29.225 | -1.914  | -1.190  | 0.170 | 0.095 | -0.037 | CP10 | -6.148  | 0.359 | 11-aug-2008 | SCEA   | SCEA |
| 102.871 | 29.290 | 0.162   | -1.300  | 0.170 | 0.093 | -0.072 | CP11 | -0.463  | 0.379 | 07-jun-2008 | SCEA   | SCEA |
| 103.742 | 30.824 | -35.364 | 30.654  | 0.575 | 0.417 | 0.041  | DD02 | -3.169  | 0.960 | 27-may-2008 | SCSM   | IOS  |
| 104.668 | 32.328 | 73.554  | 27.426  | 0.271 | 0.132 | -0.083 | DJ02 | -7.676  | 0.466 | 28-jun-2008 | SCSM   | IOS  |
| 105.770 | 30.016 | -3.894  | 4.880   | 0.538 | 0.278 | 0.101  | DJ04 | -0.251  | 0.803 | 06-jul-2008 | SCSM   | IOS  |
| 104.953 | 33.459 | 3.793   | 5.344   | 0.544 | 0.256 | 0.064  | DS08 | -6.519  | 1.016 | 26-jul-2008 | SCSM   | IOS  |
| 102.352 | 32.505 | 7.503   | -4.482  | 0.639 | 0.335 | 0.115  | DS24 | 4.409   | 1.024 | 15-jun-2008 | SCSM   | IOS  |
| 103.034 | 31.426 | 68.299  | -32.373 | 0.572 | 0.396 | 0.380  | DS25 | 3.345   | 1.453 | 13-jun-2008 | SCSM   | IOS  |
| 103.040 | 30.017 | -4.628  | 0.628   | 0.599 | 0.324 | 0.067  | DS27 | -0.044  | 1.307 | 11-jun-2008 | SCSM   | IOS  |
| 106.244 | 33.901 | 1.245   | -0.015  | 0.796 | 0.315 | -0.025 | DS30 | -2.058  | 2.000 | 01-jun-2008 | SCSM   | IOS  |
| 106.860 | 31.843 | -3.570  | 4.280   | 0.668 | 0.336 | -0.014 | DS34 | -0.522  | 0.965 | 02-jul-2008 | SCSM   | IOS  |
| 107.981 | 33.529 | -1.744  | -0.660  | 0.127 | 0.085 | -0.011 | F053 | -1.104  | 0.259 | 17-may-2008 | SXSM   | SXSM |
| 105.811 | 32.397 | -16.300 | -2.600  | 2.900 | 2.890 | -0.002 | DT07 | -7.400  | 5.180 | 23-jul-2008 | SCSM   | IOS  |
| 109.105 | 33.658 | -1.195  | -0.663  | 0.115 | 0.074 | -0.086 | F054 | 1.464   | 0.231 | 07-jun-2008 | SXSM   | SXSM |
| 106.322 | 33.062 | -2.687  | 2.002   | 0.235 | 0.176 | -0.033 | F262 | -4.560  | 0.454 | 30-may-2008 | SXSM   | SXSM |
| 105.780 | 32.825 | -4.004  | 4.023   | 0.243 | 0.177 | -0.048 | F277 | 5.626   | 0.470 | 30-may-2008 | SXSM   | SXSM |
| 107.186 | 32.862 | 5.329   | -1.544  | 0.282 | 0.184 | -0.048 | F278 | 3.993   | 0.514 | 30-may-2008 | SXSM   | SXSM |
| 107.580 | 34.432 | -0.740  | -0.343  | 0.193 | 0.094 | 0.026  | D073 | -4.628  | 0.319 | 20-may-2008 | CMONOC | SDMC |
| 106.011 | 35.173 | 0.181   | -0.053  | 0.118 | 0.080 | -0.017 | G028 | -2.494  | 0.229 | 24-may-2008 | CMONOC | SDMC |
| 105.794 | 35.079 | -0.608  | -0.231  | 0.128 | 0.085 | -0.045 | G030 | -1.846  | 0.243 | 24-may-2008 | CMONOC | SDMC |
| 106.206 | 35.005 | -0.446  | 0.392   | 0.118 | 0.080 | -0.006 | G031 | -3.977  | 0.233 | 23-may-2008 | CMONOC | SDMC |
| 106.821 | 34.894 | 0.171   | -0.354  | 0.115 | 0.080 | -0.015 | G032 | -2.412  | 0.227 | 20-may-2008 | CMONOC | SDMC |
| 105.654 | 34.872 | -1.104  | 0.424   | 0.126 | 0.090 | -0.026 | G033 | -0.841  | 0.297 | 26-may-2008 | CMONOC | SDMC |
| 106.158 | 34.749 | 0.224   | 0.322   | 0.137 | 0.086 | -0.009 | G034 | -0.955  | 0.283 | 23-may-2008 | CMONOC | SDMC |
| 105.368 | 34.792 | -0.458  | 0.549   | 0.498 | 0.172 | 0.072  | G035 | -0.611  | 0.541 | 26-may-2008 | CMONOC | SDMC |
| 106.400 | 34.515 | -2.133  | -0.876  | 1.171 | 0.385 | 0.632  | G036 | -0.108  | 0.951 | 23-may-2008 | CMONOC | SDMC |
| 105.696 | 34.594 | -0.142  | 0.353   | 0.125 | 0.082 | -0.049 | G037 | -0.871  | 0.243 | 23-may-2008 | CMONOC | SDMC |
| 105.811 | 34.251 | -0.045  | 1.175   | 0.135 | 0.086 | -0.026 | G039 | -1.051  | 0.294 | 08-jun-2008 | CMONOC | SDMC |
| 106.678 | 34.945 | 0.240   | 0.007   | 0.126 | 0.084 | -0.025 | G110 | -0.926  | 0.259 | 21-may-2008 | CMONOC | SDMC |
| 104.104 | 35.038 | -0.353  | -0.190  | 0.118 | 0.080 | -0.029 | G114 | -1.576  | 0.231 | 26-may-2008 | CMONOC | SDMC |
| 104.541 | 35.045 | -0.569  | -0.148  | 0.130 | 0.081 | -0.068 | G116 | -2.871  | 0.246 | 27-may-2008 | CMONOC | SDMC |
| 104.480 | 34.850 | -0.231  | 0.267   | 0.120 | 0.080 | -0.026 | G119 | -3.989  | 0.238 | 26-may-2008 | CMONOC | SDMC |
| 104.940 | 34.713 | -0.913  | 0.436   | 0.120 | 0.080 | -0.024 | G120 | -2.613  | 0.235 | 30-may-2008 | CMONOC | SDMC |



|         |        |          |         |       |       |        |      |         |       |             |        |      |
|---------|--------|----------|---------|-------|-------|--------|------|---------|-------|-------------|--------|------|
| 104.914 | 34.467 | -0.349   | 0.722   | 0.120 | 0.080 | -0.055 | G121 | -2.818  | 0.237 | 29-may-2008 | CMONOC | SDMC |
| 100.507 | 33.367 | 3.240    | -1.075  | 0.173 | 0.106 | 0.008  | G225 | -3.568  | 0.384 | 20-aug-2008 | IOS    | IOS  |
| 103.965 | 34.424 | 3.406    | 0.457   | 0.895 | 0.296 | -0.033 | G229 | -0.743  | 1.122 | 26-jul-2008 | IOS    | IOS  |
| 102.365 | 34.172 | 1.589    | 3.154   | 0.192 | 0.104 | 0.049  | G231 | -0.343  | 0.370 | 15-aug-2008 | IOS    | IOS  |
| 105.625 | 32.414 | -28.389  | 0.571   | 0.555 | 0.515 | -0.022 | G235 | -6.103  | 1.151 | 08-jul-2008 | IOS    | IOS  |
| 104.306 | 31.556 | -101.501 | 26.736  | 0.402 | 0.187 | 0.052  | G278 | -23.221 | 0.842 | 24-jun-2008 | IOS    | IOS  |
| 105.792 | 30.177 | -4.697   | 0.575   | 0.562 | 0.516 | -0.022 | G282 | -2.743  | 1.167 | 06-jul-2008 | IOS    | IOS  |
| 101.022 | 25.312 | -1.203   | -1.854  | 0.156 | 0.090 | 0.051  | G310 | -0.996  | 0.339 | 28-may-2008 | IOS    | YNEA |
| 101.313 | 27.591 | 2.003    | 3.720   | 0.608 | 0.551 | 0.017  | G319 | -1.278  | 1.187 | 22-may-2008 | IOS    | YNEA |
| 106.508 | 33.914 | 0.307    | -0.016  | 0.122 | 0.083 | -0.070 | H001 | -0.847  | 0.243 | 05-jun-2008 | CMONOC | SDMC |
| 105.814 | 33.891 | -0.279   | 1.951   | 0.131 | 0.086 | -0.069 | H002 | -0.366  | 0.252 | 08-jun-2008 | CMONOC | SDMC |
| 105.306 | 34.108 | 0.037    | 1.737   | 0.134 | 0.086 | -0.083 | H003 | -0.384  | 0.256 | 08-jun-2008 | CMONOC | SDMC |
| 106.924 | 33.617 | -0.525   | -0.055  | 0.083 | 0.068 | -0.001 | H004 | -0.212  | 0.170 | 17-may-2008 | CMONOC | SDMC |
| 105.594 | 33.697 | 0.079    | 2.799   | 0.082 | 0.068 | -0.012 | H005 | -0.899  | 0.166 | 17-may-2008 | CMONOC | SDMC |
| 105.285 | 33.780 | 0.525    | 1.803   | 0.119 | 0.082 | -0.035 | H006 | -0.620  | 0.237 | 09-jun-2008 | CMONOC | SDMC |
| 106.154 | 33.339 | -1.659   | 0.521   | 0.124 | 0.083 | -0.029 | H007 | -0.211  | 0.245 | 30-may-2008 | CMONOC | SDMC |
| 105.628 | 33.400 | 0.4      | 4.9     | 0.41  | 0.38  | 0.074  | H008 | 0.000   | 1.000 | 30-may-2008 | CMONOC | SDMC |
| 106.023 | 32.962 | -2.242   | 1.697   | 0.121 | 0.081 | -0.059 | H009 | 1.077   | 0.238 | 08-jun-2008 | CMONOC | SDMC |
| 105.226 | 32.571 | 42.121   | 100.295 | 0.180 | 0.101 | -0.011 | H010 | 32.431  | 0.407 | 06-jun-2008 | CMONOC | SDMC |
| 105.829 | 32.448 | -20.123  | 2.666   | 0.127 | 0.081 | -0.019 | H011 | 6.561   | 0.249 | 28-may-2008 | CMONOC | IOS  |
| 105.457 | 32.018 | -24.369  | 4.375   | 0.116 | 0.079 | -0.035 | H012 | 4.981   | 0.229 | 28-may-2008 | CMONOC | IOS  |
| 103.247 | 34.749 | 1.170    | 1.368   | 0.098 | 0.048 | 0.028  | H013 | -0.691  | 0.180 | 24-apr-2009 | CMONOC | IOS  |
| 104.073 | 34.402 | -0.622   | 0.157   | 0.118 | 0.080 | -0.012 | H014 | -2.618  | 0.232 | 29-may-2008 | CMONOC | SDMC |
| 102.502 | 34.588 | 1.541    | 0.490   | 0.100 | 0.049 | 0.047  | H015 | -0.305  | 0.181 | 19-apr-2009 | CMONOC | IOS  |
| 104.384 | 34.046 | 0.338    | 0.477   | 0.146 | 0.089 | 0.003  | H016 | -2.725  | 0.279 | 29-may-2008 | CMONOC | SDMC |
| 103.146 | 34.108 | 1.073    | -0.782  | 0.121 | 0.080 | -0.014 | H017 | -2.733  | 0.233 | 29-may-2008 | CMONOC | SDMC |
| 102.126 | 34.000 | 1.846    | -1.803  | 0.141 | 0.079 | -0.018 | H018 | -0.725  | 0.252 | 15-aug-2008 | CMONOC | SDMC |
| 104.401 | 33.787 | 0.892    | 1.231   | 0.151 | 0.095 | 0.016  | H019 | -3.261  | 0.309 | 02-jun-2008 | CMONOC | SDMC |
| 103.727 | 33.937 | 0.373    | -0.716  | 0.118 | 0.080 | -0.009 | H020 | -1.712  | 0.237 | 30-may-2008 | CMONOC | SDMC |
| 104.823 | 33.423 | 2.070    | 3.623   | 0.436 | 0.217 | 0.069  | H021 | -4.872  | 0.666 | 30-may-2008 | CMONOC | SDMC |
| 104.624 | 33.000 | 4.852    | 6.461   | 0.129 | 0.086 | -0.022 | H022 | -0.456  | 0.259 | 04-jun-2008 | CMONOC | SDMC |
| 104.225 | 33.228 | 2.856    | 0.629   | 0.084 | 0.068 | -0.016 | H024 | -4.592  | 0.170 | 19-may-2008 | CMONOC | SDMC |
| 103.434 | 32.930 | 7.232    | -4.362  | 0.352 | 0.171 | 0.262  | H025 | -3.511  | 0.583 | 02-jun-2008 | CMONOC | SDMC |
| 102.991 | 33.571 | 2.132    | -1.953  | 0.180 | 0.101 | -0.028 | H026 | -0.964  | 0.319 | 02-jun-2008 | CMONOC | SDMC |
| 101.481 | 33.429 | 3.671    | -2.604  | 0.142 | 0.082 | -0.019 | H027 | -2.427  | 0.264 | 13-aug-2008 | CMONOC | IOS  |
| 101.705 | 32.902 | 4.729    | -3.327  | 0.119 | 0.081 | -0.007 | H028 | -1.983  | 0.237 | 01-jun-2008 | CMONOC | IOS  |
| 100.594 | 33.092 | 3.271    | -1.967  | 0.171 | 0.105 | 0.030  | H029 | -3.393  | 0.382 | 20-aug-2008 | CMONOC | IOS  |
| 103.612 | 32.590 | 12.883   | -5.658  | 0.260 | 0.116 | 0.025  | H030 | -0.952  | 0.434 | 04-jun-2008 | CMONOC | SDMC |
| 102.500 | 32.785 | 6.942    | -5.396  | 0.126 | 0.082 | -0.001 | H031 | -1.207  | 0.243 | 03-jun-2008 | CMONOC | IOS  |
| 104.571 | 32.405 | 47.119   | 6.438   | 0.130 | 0.084 | 0.001  | H032 | -4.451  | 0.257 | 01-jun-2008 | CMONOC | IOS  |
| 104.831 | 32.181 | -150.620 | -15.433 | 0.117 | 0.078 | -0.009 | H033 | -64.585 | 0.223 | 31-may-2008 | CMONOC | IOS  |

|         |        |          |         |       |       |        |      |         |       |             |        |      |
|---------|--------|----------|---------|-------|-------|--------|------|---------|-------|-------------|--------|------|
| 103.731 | 32.361 | 21.200   | -6.002  | 0.125 | 0.082 | -0.065 | H034 | -0.132  | 0.252 | 05-jun-2008 | CMONOC | SDMC |
| 104.443 | 31.801 | -237.227 | 47.877  | 0.075 | 0.066 | -0.009 | H035 | -64.384 | 0.155 | 16-may-2008 | CMONOC | IOS  |
| 103.899 | 31.705 | 68.032   | 20.575  | 0.159 | 0.094 | 0.019  | H036 | -1.284  | 0.300 | 20-jun-2008 | CMONOC | IOS  |
| 103.165 | 32.075 | 22.449   | -13.499 | 0.116 | 0.079 | -0.003 | H037 | 0.355   | 0.227 | 30-may-2008 | CMONOC | IOS  |
| 100.727 | 31.861 | 3.728    | -1.282  | 0.146 | 0.090 | 0.019  | H039 | -0.901  | 0.275 | 24-jun-2008 | CMONOC | IOS  |
| 101.614 | 31.770 | 8.008    | -3.411  | 0.122 | 0.080 | -0.038 | H040 | -0.969  | 0.237 | 10-jun-2008 | CMONOC | IOS  |
| 101.070 | 32.318 | 5.529    | -2.990  | 0.179 | 0.105 | 0.008  | H041 | -0.084  | 0.341 | 25-jun-2008 | CMONOC | IOS  |
| 100.333 | 32.274 | 2.749    | -1.908  | 0.140 | 0.079 | -0.003 | H042 | -0.312  | 0.257 | 15-aug-2008 | CMONOC | IOS  |
| 104.781 | 31.486 | -30.538  | 5.409   | 0.119 | 0.081 | 0.008  | H043 | 2.426   | 0.246 | 16-may-2008 | CMONOC | IOS  |
| 104.186 | 31.352 | -97.989  | 39.821  | 0.075 | 0.066 | -0.001 | H044 | -9.468  | 0.153 | 16-may-2008 | CMONOC | IOS  |
| 103.611 | 31.474 | 97.056   | 02.456  | 0.208 | 0.166 | 0.006  | H045 | -57.270 | 0.412 | 19-jun-2008 | CMONOC | IOS  |
| 102.670 | 31.850 | 24.017   | -13.124 | 0.120 | 0.080 | -0.041 | H046 | -1.615  | 0.234 | 11-jun-2008 | CMONOC | IOS  |
| 102.095 | 31.466 | 15.523   | -3.642  | 0.115 | 0.079 | -0.007 | H047 | -1.099  | 0.237 | 31-may-2008 | CMONOC | IOS  |
| 104.440 | 31.157 | -30.546  | 10.057  | 0.125 | 0.084 | 0.011  | H048 | 5.806   | 0.266 | 16-may-2008 | CMONOC | IOS  |
| 103.691 | 31.060 | -127.532 | 79.070  | 0.078 | 0.066 | -0.001 | H049 | -24.836 | 0.159 | 17-may-2008 | CMONOC | IOS  |
| 103.145 | 31.008 | 62.466   | -38.335 | 0.130 | 0.082 | -0.078 | H050 | -27.144 | 0.253 | 11-jun-2008 | CMONOC | IOS  |
| 102.774 | 30.991 | 31.956   | -2.488  | 0.071 | 0.055 | -0.013 | H051 | -0.519  | 0.144 | 30-may-2008 | CMONOC | IOG  |
| 101.866 | 30.949 | 7.533    | -0.632  | 0.121 | 0.080 | -0.008 | H052 | -0.559  | 0.262 | 30-may-2008 | CMONOC | SCEA |
| 101.162 | 30.955 | 3.803    | -0.019  | 0.121 | 0.081 | 0.024  | H053 | -1.466  | 0.254 | 27-may-2008 | CMONOC | SCEA |
| 100.749 | 31.296 | 3.258    | -1.197  | 0.183 | 0.106 | 0.048  | H054 | -0.861  | 0.401 | 27-may-2008 | CMONOC | SCEA |
| 100.296 | 31.646 | 4.744    | -0.416  | 0.111 | 0.056 | 0.090  | H056 | 0.350   | 0.234 | 23-aug-2009 | CMONOC | IOS  |
| 100.240 | 31.320 | 2.451    | -0.133  | 0.176 | 0.099 | 0.070  | H057 | -0.321  | 0.377 | 23-aug-2008 | CMONOC | IOS  |
| 104.077 | 30.731 | -20.094  | 13.367  | 0.116 | 0.078 | -0.002 | H058 | 3.308   | 0.224 | 25-may-2008 | CMONOC | IOS  |
| 103.409 | 30.415 | -1.628   | -1.027  | 0.159 | 0.088 | -0.035 | H060 | -1.983  | 0.331 | 25-may-2008 | CMONOC | IOS  |
| 102.840 | 30.252 | -0.022   | -1.988  | 0.152 | 0.093 | -0.013 | H061 | -0.582  | 0.341 | 18-may-2008 | CMONOC | SCEA |
| 100.929 | 31.143 | 3.784    | -1.247  | 0.128 | 0.083 | 0.051  | H062 | -0.268  | 0.255 | 27-may-2008 | CMONOC | SCEA |
| 100.307 | 30.924 | 2.703    | -0.224  | 0.172 | 0.100 | 0.018  | H063 | -1.824  | 0.364 | 23-aug-2008 | CMONOC | IOS  |
| 103.845 | 30.041 | -3.127   | 0.636   | 0.138 | 0.093 | -0.021 | H064 | 0.535   | 0.319 | 22-may-2008 | CMONOC | IOS  |
| 103.002 | 29.975 | -0.270   | -0.712  | 0.145 | 0.089 | 0.035  | H065 | -0.473  | 0.329 | 18-may-2008 | CMONOC | SCEA |
| 101.788 | 30.074 | 1.119    | -0.411  | 0.122 | 0.080 | 0.020  | H066 | -0.321  | 0.246 | 22-may-2008 | CMONOC | SCEA |
| 101.485 | 30.075 | 0.518    | -0.650  | 0.128 | 0.081 | 0.044  | H067 | -1.811  | 0.250 | 14-oct-2008 | CMONOC | SCEA |
| 101.023 | 30.106 | 0.764    | -0.822  | 0.131 | 0.085 | -0.012 | H068 | -0.530  | 0.266 | 24-may-2008 | CMONOC | SCEA |
| 102.816 | 29.789 | -0.697   | -1.177  | 0.086 | 0.059 | -0.006 | H072 | 0.727   | 0.169 | 19-may-2008 | CMONOC | SCEA |
| 102.289 | 29.848 | 0.202    | -1.044  | 0.122 | 0.074 | 0.051  | H073 | 1.257   | 0.250 | 21-may-2008 | CMONOC | SCEA |
| 101.558 | 29.846 | 0.539    | -0.011  | 0.100 | 0.064 | 0.025  | H074 | -0.009  | 0.210 | 23-may-2008 | CMONOC | SCEA |
| 100.390 | 29.695 | -0.614   | 1.043   | 0.432 | 0.409 | 0.054  | H075 | 3.239   | 0.866 | 16-sep-2008 | CMONOC | IOS  |
| 103.467 | 29.601 | -1.049   | -0.270  | 0.084 | 0.059 | -0.008 | H076 | 1.426   | 0.165 | 19-may-2008 | CMONOC | IOS  |
| 102.655 | 29.347 | -0.930   | -0.223  | 0.113 | 0.071 | -0.010 | H077 | -0.705  | 0.238 | 20-may-2008 | CMONOC | IOS  |
| 102.080 | 29.688 | -0.027   | -1.100  | 0.106 | 0.068 | 0.038  | H078 | -1.140  | 0.233 | 21-may-2008 | CMONOC | IOS  |
| 103.261 | 29.228 | -0.484   | -0.639  | 0.106 | 0.067 | -0.014 | H081 | 0.091   | 0.215 | 19-may-2008 | CMONOC | IOS  |
| 102.438 | 29.262 | 0.003    | -1.264  | 0.098 | 0.063 | -0.025 | H082 | -0.595  | 0.196 | 22-may-2008 | CMONOC | IOS  |

|         |        |        |        |       |       |        |      |        |       |             |        |      |
|---------|--------|--------|--------|-------|-------|--------|------|--------|-------|-------------|--------|------|
| 101.517 | 28.963 | -0.462 | -0.400 | 0.115 | 0.069 | -0.029 | H083 | -0.434 | 0.235 | 28-may-2008 | CMONOC | IOS  |
| 103.897 | 28.955 | 0.740  | -0.620 | 0.147 | 0.089 | -0.008 | H084 | -1.193 | 0.305 | 20-may-2008 | CMONOC | IOS  |
| 102.766 | 28.955 | -0.565 | -0.982 | 0.113 | 0.070 | 0.006  | H087 | -1.674 | 0.223 | 20-may-2008 | CMONOC | IOS  |
| 103.978 | 28.605 | -0.756 | -0.059 | 0.070 | 0.055 | 0.004  | H088 | 0.880  | 0.146 | 19-may-2008 | CMONOC | IOS  |
| 103.120 | 28.312 | -0.746 | 0.042  | 0.124 | 0.076 | -0.012 | H089 | 0.706  | 0.272 | 31-may-2008 | CMONOC | IOS  |
| 102.532 | 28.672 | 0.340  | -0.627 | 0.062 | 0.052 | 0.012  | H090 | -0.876 | 0.124 | 20-may-2008 | CMONOC | IOS  |
| 102.437 | 28.300 | -1.794 | -1.434 | 0.098 | 0.065 | -0.000 | H091 | -0.605 | 0.198 | 20-may-2008 | CMONOC | IOS  |
| 102.125 | 28.514 | -1.902 | -1.597 | 0.107 | 0.068 | -0.003 | H092 | 0.787  | 0.214 | 24-may-2008 | CMONOC | IOS  |
| 103.639 | 28.250 | 0.148  | -0.339 | 0.297 | 0.140 | -0.004 | H093 | -0.763 | 1.043 | 19-may-2008 | CMONOC | IOS  |
| 102.832 | 27.998 | -0.185 | -1.076 | 0.125 | 0.076 | -0.005 | H094 | -0.980 | 0.271 | 28-may-2008 | CMONOC | IOS  |
| 102.232 | 27.874 | -0.556 | -1.117 | 0.154 | 0.086 | -0.127 | H095 | -0.336 | 0.376 | 25-may-2008 | CMONOC | YNEA |
| 101.238 | 27.655 | -1.653 | -0.361 | 0.122 | 0.076 | -0.001 | H096 | -0.599 | 0.278 | 25-may-2008 | CMONOC | YNEA |
| 100.653 | 27.747 | -0.232 | -0.616 | 0.125 | 0.076 | 0.008  | H097 | 0.352  | 0.275 | 31-may-2008 | CMONOC | YNEA |
| 103.892 | 27.769 | -0.981 | -0.433 | 0.123 | 0.077 | 0.005  | H098 | 0.492  | 0.279 | 22-may-2008 | CMONOC | YNEA |
| 103.269 | 27.684 | -1.177 | -0.388 | 0.161 | 0.090 | -0.019 | H099 | 0.087  | 0.351 | 03-jun-2008 | CMONOC | YNEA |
| 102.789 | 27.693 | -0.852 | -0.641 | 0.136 | 0.080 | -0.058 | H100 | -0.844 | 0.295 | 06-jun-2008 | CMONOC | YNEA |
| 103.686 | 27.356 | -0.114 | -0.610 | 0.120 | 0.076 | -0.009 | H101 | 0.161  | 0.271 | 25-may-2008 | CMONOC | YNEA |
| 102.548 | 27.370 | -0.330 | -0.460 | 0.129 | 0.078 | -0.014 | H102 | -0.417 | 0.286 | 09-jun-2008 | CMONOC | YNEA |
| 102.187 | 27.453 | -0.660 | -0.804 | 0.129 | 0.080 | 0.025  | H103 | 0.266  | 0.298 | 22-may-2008 | CMONOC | YNEA |
| 101.709 | 27.539 | -0.833 | -1.518 | 0.131 | 0.079 | -0.005 | H104 | 0.684  | 0.294 | 19-may-2008 | CMONOC | YNEA |
| 100.934 | 27.138 | -0.989 | -0.169 | 0.158 | 0.088 | 0.002  | H106 | -0.815 | 0.337 | 03-jun-2008 | CMONOC | YNEA |
| 102.906 | 26.931 | 0.263  | -0.756 | 0.132 | 0.079 | 0.009  | H108 | -0.049 | 0.288 | 28-may-2008 | CMONOC | YNEA |
| 102.610 | 26.619 | -0.711 | -1.007 | 0.122 | 0.076 | -0.017 | H109 | -1.091 | 0.285 | 03-jun-2008 | CMONOC | YNEA |
| 102.263 | 26.689 | -0.077 | -1.298 | 0.124 | 0.076 | -0.002 | H110 | -0.690 | 0.278 | 31-may-2008 | CMONOC | YNEA |
| 102.100 | 26.825 | -0.832 | -0.820 | 0.122 | 0.076 | 0.002  | H111 | -0.316 | 0.277 | 28-may-2008 | CMONOC | YNEA |
| 101.958 | 27.048 | -0.944 | -0.832 | 0.109 | 0.071 | 0.005  | H112 | 0.464  | 0.249 | 19-may-2008 | CMONOC | YNEA |
| 101.854 | 26.689 | -0.503 | -0.679 | 0.126 | 0.077 | 0.009  | H113 | -0.496 | 0.281 | 25-may-2008 | CMONOC | YNEA |
| 101.244 | 26.676 | -0.142 | -0.717 | 0.126 | 0.078 | 0.011  | H114 | -0.899 | 0.289 | 22-may-2008 | CMONOC | YNEA |
| 101.748 | 26.503 | -0.687 | -0.702 | 0.119 | 0.075 | 0.007  | H116 | -0.988 | 0.275 | 19-may-2008 | CMONOC | YNEA |
| 100.756 | 26.665 | 1.285  | -0.698 | 0.280 | 0.145 | -0.069 | H117 | -0.804 | 0.661 | 06-jun-2008 | CMONOC | YNEA |
| 103.226 | 26.405 | -0.099 | -0.555 | 0.125 | 0.077 | 0.007  | H119 | -0.392 | 0.276 | 31-may-2008 | CMONOC | YNEA |
| 103.165 | 26.105 | 0.169  | -1.036 | 0.152 | 0.087 | -0.001 | H120 | -0.089 | 0.330 | 03-jun-2008 | CMONOC | YNEA |
| 102.531 | 26.002 | -0.459 | -1.014 | 0.133 | 0.079 | -0.036 | H121 | -0.014 | 0.292 | 07-jun-2008 | CMONOC | YNEA |
| 101.682 | 26.050 | -0.218 | -1.107 | 0.120 | 0.076 | 0.003  | H122 | -0.194 | 0.278 | 22-may-2008 | CMONOC | YNEA |
| 100.596 | 26.212 | -0.392 | -0.186 | 0.128 | 0.077 | -0.003 | H123 | -0.543 | 0.282 | 09-jun-2008 | CMONOC | YNEA |
| 103.241 | 25.607 | 0.299  | -0.485 | 0.127 | 0.078 | -0.014 | H126 | -0.548 | 0.284 | 09-jun-2008 | CMONOC | YNEA |
| 102.940 | 25.798 | 0.060  | -0.816 | 0.137 | 0.080 | -0.050 | H127 | -0.306 | 0.300 | 06-jun-2008 | CMONOC | YNEA |
| 102.505 | 25.576 | -1.059 | -0.537 | 0.123 | 0.077 | -0.030 | H128 | -0.964 | 0.285 | 10-jun-2008 | CMONOC | YNEA |
| 101.901 | 25.642 | -1.121 | -1.093 | 0.121 | 0.076 | -0.012 | H129 | -0.726 | 0.275 | 19-may-2008 | CMONOC | YNEA |
| 101.320 | 25.732 | 0.243  | -1.307 | 0.119 | 0.075 | 0.013  | H130 | 0.077  | 0.270 | 25-may-2008 | CMONOC | YNEA |
| 100.559 | 25.797 | 0.036  | -0.669 | 0.253 | 0.119 | 0.012  | H131 | -0.541 | 0.491 | 04-jun-2008 | CMONOC | YNEA |

|         |        |         |        |       |       |        |      |        |       |             |        |      |
|---------|--------|---------|--------|-------|-------|--------|------|--------|-------|-------------|--------|------|
| 100.547 | 25.482 | 0.138   | -1.248 | 0.120 | 0.075 | 0.011  | H138 | -0.885 | 0.267 | 31-may-2008 | CMONOC | YNEA |
| 100.496 | 25.341 | 0.058   | -1.122 | 0.134 | 0.079 | -0.022 | H140 | -1.930 | 0.291 | 07-jun-2008 | CMONOC | YNEA |
| 100.522 | 25.037 | 0.608   | -0.169 | 0.126 | 0.077 | -0.007 | H141 | -1.854 | 0.293 | 10-jun-2008 | CMONOC | YNEA |
| 103.053 | 33.531 | 5.246   | -1.984 | 0.402 | 0.173 | 0.271  | HEIQ | -0.681 | 0.575 | 21-aug-2008 | SCSM   | IOS  |
| 104.585 | 30.317 | -5.986  | 3.100  | 0.156 | 0.090 | -0.004 | HZ71 | 0.843  | 0.336 | 26-may-2008 | CMONOC | IOS  |
| 104.585 | 30.317 | -6.3    | 3.4    | 0.32  | 0.32  | 0.004  | HN02 | 0.000  | 1.000 | 26-may-2008 | SCEA   | SCEA |
| 104.068 | 29.660 | -2.1    | 0.6    | 0.27  | 0.26  | 0.010  | HN05 | 0.000  | 1.000 | 22-may-2008 | SCEA   | SCEA |
| 103.679 | 25.090 | -0.1    | -0.5   | 0.30  | 0.30  | 0.001  | HN06 | 0.000  | 1.000 | 22-may-2008 | SCEA   | SCEA |
| 99.687  | 33.803 | 1.925   | -0.699 | 0.099 | 0.050 | -0.034 | J006 | -0.304 | 0.185 | 25-jun-2009 | CMONOC | IOS  |
| 99.192  | 31.938 | 1.755   | 0.061  | 0.121 | 0.059 | 0.007  | J009 | 2.378  | 0.239 | 13-apr-2009 | CMONOC | IOS  |
| 108.086 | 35.058 | 0.392   | 0.166  | 0.105 | 0.068 | 0.007  | JB08 | -0.601 | 0.206 | 17-may-2008 | CMONOC | SDMC |
| 106.680 | 33.115 | -0.559  | 0.709  | 0.114 | 0.080 | -0.059 | JB23 | 1.110  | 0.226 | 11-jun-2008 | CMONOC | SDMC |
| 106.034 | 30.804 | -1.054  | 1.386  | 0.226 | 0.173 | -0.006 | JB24 | 1.092  | 0.459 | 30-may-2008 | CMONOC | SCSM |
| 105.378 | 35.141 | -0.379  | 0.690  | 0.111 | 0.079 | -0.027 | JB27 | -1.916 | 0.222 | 27-may-2008 | CMONOC | SDMC |
| 103.889 | 33.276 | 2.907   | -1.390 | 0.124 | 0.082 | 0.035  | JB33 | -1.860 | 0.251 | 30-may-2008 | CMONOC | SDMC |
| 102.306 | 31.705 | 18.344  | -7.681 | 0.116 | 0.078 | -0.067 | JB34 | -4.481 | 0.226 | 06-jun-2008 | CMONOC | IOS  |
| 101.496 | 30.494 | 1.861   | -0.521 | 0.112 | 0.077 | 0.001  | JB35 | -2.307 | 0.220 | 24-may-2008 | CMONOC | SCEA |
| 103.526 | 28.842 | -0.327  | -0.879 | 0.123 | 0.082 | 0.014  | JB36 | -1.615 | 0.255 | 19-may-2008 | CMONOC | IOS  |
| 101.513 | 27.420 | -1.299  | -1.289 | 0.159 | 0.095 | 0.006  | JB37 | -0.635 | 0.340 | 28-may-2008 | CMONOC | YNEA |
| 102.381 | 32.417 | 12.032  | -5.409 | 0.566 | 0.208 | -0.071 | LRGB | 1.914  | 0.741 | 23-jun-2008 | SCSM   | IOS  |
| 101.403 | 31.570 | 7.564   | -2.237 | 0.202 | 0.128 | -0.078 | NP01 | 2.990  | 0.608 | 14-aug-2008 | SCEA   | SCEA |
| 103.169 | 31.448 | 73.7    | -39.2  | 0.28  | 0.280 | 0.010  | NR09 | 0.000  | 0.50  | 02-jun-2008 | SCEA   | IOG  |
| 104.211 | 34.232 | 2.684   | -0.124 | 0.546 | 0.246 | 0.041  | RP07 | -0.471 | 0.938 | 26-jul-2008 | FSDI   | FSDI |
| 104.536 | 33.957 | 3.492   | 1.886  | 0.530 | 0.245 | 0.071  | RP08 | -0.387 | 0.943 | 26-jul-2008 | FSDI   | FSDI |
| 104.627 | 33.581 | 1.633   | 2.419  | 0.564 | 0.261 | 0.066  | RP09 | -0.609 | 1.063 | 26-jul-2008 | FSDI   | FSDI |
| 104.896 | 33.397 | 2.744   | 5.277  | 0.593 | 0.300 | 0.098  | RP10 | -0.854 | 1.093 | 26-jul-2008 | FSDI   | FSDI |
| 105.160 | 33.142 | 3.888   | 10.703 | 0.546 | 0.254 | 0.071  | RP11 | -0.145 | 1.004 | 26-jul-2008 | FSDI   | FSDI |
| 105.492 | 32.808 | 9.409   | 29.525 | 1.010 | 0.406 | -0.257 | RP12 | 11.876 | 2.747 | 27-jul-2008 | FSDI   | FSDI |
| 105.857 | 32.477 | -13.848 | 3.350  | 0.479 | 0.214 | 0.054  | RP13 | -5.020 | 0.834 | 26-jul-2008 | FSDI   | FSDI |
| 102.438 | 31.143 | 22.7    | -3.5   | 0.73  | 0.730 | 0.001  | SD07 | 8.000  | 5.00  | 29-may-2008 | SCEA   | IOG  |
| 104.465 | 28.735 | -0.208  | -0.846 | 0.376 | 0.322 | 0.018  | SP01 | 1.689  | 0.768 | 05-oct-2008 | IOS    | SCEA |
| 104.166 | 28.726 | -0.526  | 0.057  | 0.387 | 0.326 | 0.011  | SP02 | 0.915  | 0.805 | 05-oct-2008 | IOS    | SCEA |
| 103.804 | 28.668 | -2.895  | -1.544 | 0.487 | 0.384 | 0.052  | SP03 | 10.245 | 1.452 | 11-oct-2008 | IOS    | SCEA |
| 103.711 | 28.666 | -0.573  | 0.395  | 0.405 | 0.335 | 0.010  | SP04 | -3.744 | 1.003 | 11-oct-2008 | IOS    | SCEA |
| 103.690 | 28.562 | -1.863  | -1.255 | 0.370 | 0.312 | 0.020  | SP05 | -0.204 | 0.811 | 11-oct-2008 | IOS    | SCEA |
| 103.535 | 28.460 | -1.841  | -0.237 | 0.368 | 0.305 | 0.009  | SP06 | -0.129 | 0.762 | 26-sep-2008 | IOS    | SCEA |
| 103.451 | 28.322 | -1.686  | -0.787 | 0.351 | 0.293 | 0.001  | SP07 | 0.111  | 0.697 | 14-oct-2008 | IOS    | SCEA |
| 103.333 | 28.355 | -1.933  | -2.571 | 0.347 | 0.293 | 0.013  | SP08 | 0.638  | 0.697 | 14-oct-2008 | IOS    | SCEA |
| 103.213 | 28.396 | -1.746  | -0.354 | 0.341 | 0.292 | 0.006  | SP09 | 1.748  | 0.692 | 14-oct-2008 | IOS    | SCEA |
| 102.970 | 28.074 | -0.422  | -0.962 | 0.366 | 0.316 | 0.046  | SP10 | -0.810 | 0.732 | 30-sep-2008 | IOS    | SCEA |
| 102.898 | 28.063 | -0.868  | 0.175  | 0.348 | 0.313 | 0.031  | SP11 | -0.179 | 0.678 | 30-sep-2008 | IOS    | SCEA |

|         |        |        |        |       |       |        |      |        |       |             |      |          |
|---------|--------|--------|--------|-------|-------|--------|------|--------|-------|-------------|------|----------|
| 102.853 | 28.008 | -0.847 | -0.176 | 0.355 | 0.315 | 0.040  | SP12 | -1.033 | 0.697 | 30-sep-2008 | IOS  | SCEA     |
| 102.803 | 27.997 | 0.618  | -0.708 | 0.347 | 0.290 | 0.030  | SP13 | -0.287 | 0.702 | 17-oct-2008 | IOS  | SCEA     |
| 102.716 | 27.937 | -0.377 | -0.135 | 0.343 | 0.289 | 0.017  | SP14 | -0.237 | 0.700 | 17-oct-2008 | IOS  | SCEA     |
| 102.645 | 27.915 | -1.338 | 0.147  | 0.350 | 0.290 | 0.029  | SP15 | -0.876 | 0.692 | 17-oct-2008 | IOS  | SCEA     |
| 102.565 | 27.879 | -0.827 | 0.549  | 0.359 | 0.311 | 0.034  | SP16 | -0.139 | 0.724 | 20-oct-2008 | IOS  | SCEA     |
| 102.379 | 27.877 | 2.422  | -2.571 | 0.370 | 0.318 | 0.028  | SP17 | -0.122 | 0.783 | 20-oct-2008 | IOS  | SCEA     |
| 102.293 | 27.886 | 2.889  | -3.262 | 0.417 | 0.325 | 0.030  | SP18 | -2.751 | 0.922 | 20-oct-2008 | IOS  | SCEA     |
| 102.316 | 27.781 | -1.452 | -0.423 | 0.331 | 0.301 | 0.031  | SP19 | 3.850  | 0.660 | 23-oct-2008 | IOS  | SCEA     |
| 102.218 | 27.729 | -0.860 | -0.190 | 0.332 | 0.301 | 0.031  | SP20 | 1.609  | 0.660 | 23-oct-2008 | IOS  | SCEA     |
| 102.158 | 27.719 | -0.430 | -0.397 | 0.334 | 0.302 | 0.033  | SP21 | 2.368  | 0.664 | 23-oct-2008 | IOS  | SCEA     |
| 102.023 | 27.714 | -0.202 | 0.477  | 0.377 | 0.329 | 0.046  | SP22 | 4.683  | 0.766 | 29-oct-2008 | IOS  | SCEA     |
| 101.942 | 27.717 | -0.534 | 0.108  | 0.382 | 0.330 | 0.044  | SP23 | 5.148  | 0.784 | 29-oct-2008 | IOS  | SCEA     |
| 101.406 | 27.451 | -4.078 | -2.400 | 0.389 | 0.331 | 0.055  | SP24 | 10.759 | 0.799 | 29-oct-2008 | IOS  | SCEA     |
| 101.217 | 27.743 | -2.268 | 0.215  | 0.375 | 0.326 | 0.062  | SP25 | 7.518  | 0.763 | 26-oct-2008 | IOS  | SCEA     |
| 101.254 | 27.859 | 0.181  | 0.190  | 0.396 | 0.337 | 0.035  | SP26 | 0.925  | 0.841 | 26-oct-2008 | IOS  | SCEA     |
| 101.196 | 28.021 | -1.619 | 0.889  | 0.419 | 0.351 | 0.056  | SP28 | 3.205  | 1.002 | 26-oct-2008 | IOS  | SCEA     |
| 100.508 | 29.729 | 0.852  | 1.429  | 0.410 | 0.352 | 0.034  | SR01 | -2.703 | 0.785 | 12-sep-2008 | IOS  | SCEA     |
| 100.413 | 29.043 | -0.548 | -0.171 | 0.417 | 0.358 | 0.037  | SR02 | -0.989 | 0.818 | 16-sep-2008 | IOS  | SCEA     |
| 100.319 | 28.547 | 0.298  | 1.803  | 0.432 | 0.367 | 0.004  | SR03 | -6.537 | 0.848 | 16-sep-2008 | IOS  | SCEA     |
| 99.378  | 29.043 | -0.423 | -0.653 | 0.386 | 0.336 | 0.023  | SR04 | -1.996 | 0.727 | 21-sep-2008 | IOS  | SCEA     |
| 99.286  | 28.713 | -0.662 | -0.240 | 0.411 | 0.343 | 0.048  | SR05 | -0.394 | 0.885 | 21-sep-2008 | IOS  | SCEA     |
| 99.337  | 28.213 | -0.565 | -1.345 | 0.391 | 0.338 | 0.057  | SR06 | -2.908 | 0.736 | 21-sep-2008 | IOS  | SCEA     |
| 102.736 | 28.422 | -0.314 | -1.920 | 0.390 | 0.337 | 0.036  | SR07 | -3.638 | 0.765 | 05-oct-2008 | IOS  | SCEA     |
| 103.113 | 28.552 | -0.523 | -0.703 | 0.366 | 0.323 | 0.005  | SR08 | -1.889 | 0.706 | 26-sep-2008 | IOS  | SCEA     |
| 101.470 | 33.196 | 6.531  | -1.517 | 0.693 | 0.224 | -0.015 | W006 | -1.299 | 1.174 | 13-aug-2008 | SCSM | IOS/SCEA |
| 102.850 | 33.946 | 7.181  | -0.320 | 0.550 | 0.187 | -0.149 | W007 | -0.491 | 0.760 | 16-aug-2008 | SCSM | IOS/SCEA |
| 102.779 | 33.530 | 7.034  | -1.290 | 0.371 | 0.185 | -0.094 | W008 | 1.019  | 0.742 | 18-aug-2008 | SCSM | IOS/SCEA |
| 102.613 | 33.436 | 6.825  | -1.011 | 0.350 | 0.206 | 0.031  | W009 | -1.153 | 0.804 | 19-aug-2008 | SCSM | IOS/SCEA |
| 102.533 | 33.266 | 7.959  | -2.183 | 0.398 | 0.183 | -0.089 | W010 | 0.831  | 0.746 | 19-aug-2008 | SCSM | IOS/SCEA |
| 102.622 | 33.119 | 9.106  | -2.643 | 0.345 | 0.201 | 0.011  | W011 | -0.801 | 0.794 | 20-aug-2008 | SCSM | IOS/SCEA |
| 102.963 | 33.776 | 4.026  | -2.224 | 0.417 | 0.213 | 0.234  | W012 | -0.002 | 0.763 | 17-aug-2008 | SCSM | IOS/SCEA |
| 103.347 | 33.671 | 1.281  | -2.357 | 0.281 | 0.154 | -0.060 | W013 | -0.304 | 0.600 | 21-aug-2008 | SCSM | IOS/SCEA |
| 103.672 | 33.562 | 1.656  | -1.359 | 0.476 | 0.212 | 0.448  | W014 | 0.276  | 0.913 | 26-jun-2008 | SCSM | IOS/SCEA |
| 103.972 | 33.534 | 2.249  | -0.041 | 0.283 | 0.180 | 0.131  | W015 | 0.261  | 0.578 | 26-jun-2008 | SCSM | IOS/SCEA |
| 100.437 | 32.142 | 7.703  | -1.058 | 0.389 | 0.184 | -0.063 | W024 | -0.504 | 0.767 | 15-aug-2008 | SCSM | IOS/SCEA |
| 103.002 | 32.969 | 6.177  | -6.367 | 0.450 | 0.183 | -0.140 | W030 | 1.069  | 0.709 | 17-jun-2008 | SCSM | IOS/SCEA |
| 102.629 | 32.924 | 7.054  | -4.531 | 0.358 | 0.207 | -0.085 | W031 | -2.626 | 0.769 | 16-jun-2008 | SCSM | IOS/SCEA |
| 102.358 | 32.699 | 11.347 | -4.778 | 0.706 | 0.223 | -0.153 | W033 | -2.923 | 1.206 | 16-jun-2008 | SCSM | IOS/SCEA |
| 102.500 | 32.174 | 14.370 | -7.823 | 0.356 | 0.208 | -0.030 | W034 | 0.924  | 0.723 | 14-jun-2008 | SCSM | IOS/SCEA |
| 103.346 | 32.953 | 10.053 | -3.267 | 0.395 | 0.183 | 0.247  | W036 | 0.406  | 0.624 | 18-jun-2008 | SCSM | IOS/SCEA |
| 103.709 | 33.025 | 5.061  | -4.145 | 0.428 | 0.150 | -0.006 | W037 | -0.816 | 0.574 | 18-jun-2008 | SCSM | IOS/SCEA |

|         |        |          |         |       |       |        |      |         |       |             |      |          |
|---------|--------|----------|---------|-------|-------|--------|------|---------|-------|-------------|------|----------|
| 103.906 | 32.785 | 9.388    | -3.062  | 0.265 | 0.155 | 0.016  | W038 | 2.815   | 0.598 | 19-jun-2008 | SCSM | IOS/SCEA |
| 103.677 | 32.042 | 31.874   | -5.696  | 0.830 | 0.364 | 0.397  | W040 | -5.111  | 1.438 | 30-may-2008 | SCSM | IOS/SCEA |
| 104.177 | 32.507 | 21.743   | -0.973  | 0.333 | 0.187 | 0.171  | W041 | 29.681  | 0.704 | 21-jun-2008 | SCSM | IOS/SCEA |
| 104.405 | 32.469 | 30.389   | 1.650   | 0.422 | 0.256 | -0.134 | W042 | 0.034   | 1.183 | 21-jun-2008 | SCSM | IOS/SCEA |
| 104.908 | 32.449 | 49.449   | 85.850  | 0.423 | 0.231 | 0.087  | W043 | 14.954  | 0.850 | 23-jun-2008 | SCSM | IOS/SCEA |
| 104.751 | 32.056 | -142.765 | -14.625 | 0.438 | 0.227 | 0.145  | W044 | -32.491 | 0.760 | 30-jun-2008 | SCSM | IOS/SCEA |
| 105.479 | 32.674 | 1.536    | 25.095  | 0.315 | 0.157 | 0.152  | W045 | 2.738   | 0.563 | 25-jun-2008 | SCSM | IOS/SCEA |
| 105.302 | 32.606 | 31.923   | 54.822  | 0.321 | 0.179 | 0.053  | W046 | 31.285  | 0.803 | 23-jun-2008 | SCSM | IOS/SCEA |
| 105.516 | 32.565 | -35.383  | 2.892   | 0.449 | 0.254 | 0.220  | W047 | -5.995  | 0.972 | 25-jun-2008 | SCSM | IOS/SCEA |
| 105.706 | 32.395 | -24.018  | 3.307   | 0.273 | 0.134 | -0.057 | W048 | -0.303  | 0.490 | 06-jul-2008 | SCSM | IOS/SCEA |
| 105.560 | 32.321 | -35.236  | 4.293   | 0.385 | 0.182 | 0.111  | W049 | -0.837  | 0.614 | 06-jul-2008 | SCSM | IOS/SCEA |
| 105.442 | 32.045 | -25.929  | 4.608   | 0.311 | 0.190 | -0.069 | W050 | 1.214   | 0.750 | 04-jul-2008 | SCSM | IOS/SCEA |
| 105.541 | 32.160 | -27.874  | 5.334   | 0.332 | 0.177 | 0.152  | W051 | 0.290   | 0.680 | 04-jul-2008 | SCSM | IOS/SCEA |
| 105.803 | 32.130 | -16.351  | 3.159   | 0.441 | 0.153 | -0.120 | W052 | 0.348   | 0.554 | 04-jul-2008 | SCSM | IOS/SCEA |
| 106.003 | 32.685 | -9.884   | 0.047   | 0.375 | 0.239 | 0.082  | W053 | 1.631   | 0.963 | 06-jul-2008 | SCSM | IOS/SCEA |
| 106.857 | 32.538 | -3.204   | 0.056   | 0.633 | 0.255 | 0.084  | W054 | 0.061   | 1.287 | 28-aug-2008 | SCSM | IOS/SCEA |
| 105.981 | 32.304 | -12.282  | 2.991   | 0.408 | 0.145 | -0.097 | W055 | 5.187   | 0.563 | 29-jun-2008 | SCSM | IOS/SCEA |
| 106.235 | 32.222 | -8.258   | 0.248   | 0.342 | 0.166 | 0.164  | W056 | 11.103  | 0.626 | 29-jun-2008 | SCSM | IOS/SCEA |
| 106.430 | 32.241 | -5.851   | 0.378   | 0.527 | 0.366 | -0.161 | W057 | 2.044   | 1.427 | 01-jul-2008 | SCSM | IOS/SCEA |
| 106.842 | 32.357 | -4.931   | 0.007   | 0.664 | 0.312 | 0.276  | W058 | -2.777  | 1.191 | 28-aug-2008 | SCSM | IOS/SCEA |
| 106.469 | 32.079 | -6.074   | 0.603   | 0.455 | 0.233 | 0.228  | W059 | -0.228  | 1.267 | 03-jul-2008 | SCSM | IOS/SCEA |
| 107.075 | 32.662 | -1.325   | 0.983   | 0.546 | 0.272 | -0.064 | W061 | -1.146  | 1.354 | 29-aug-2008 | SCSM | IOS/SCEA |
| 100.614 | 31.995 | 11.106   | -2.461  | 0.585 | 0.354 | -0.082 | W080 | -2.214  | 1.724 | 17-aug-2008 | SCSM | IOS/SCEA |
| 100.995 | 31.993 | 7.640    | -1.809  | 0.901 | 0.393 | 0.056  | W081 | 1.593   | 1.796 | 13-aug-2008 | SCSM | IOS/SCEA |
| 100.749 | 31.776 | 8.193    | -0.390  | 0.592 | 0.352 | -0.089 | W082 | -1.118  | 1.346 | 18-aug-2008 | SCSM | IOS/SCEA |
| 101.261 | 31.788 | 10.215   | -1.880  | 0.467 | 0.255 | 0.305  | W088 | 1.192   | 0.958 | 13-aug-2008 | SCSM | IOS/SCEA |
| 101.908 | 31.801 | 15.484   | -3.764  | 0.743 | 0.350 | 0.273  | W089 | -1.197  | 1.229 | 09-jun-2008 | SCSM | IOS/SCEA |
| 102.141 | 31.941 | 14.082   | -4.637  | 0.679 | 0.513 | 0.003  | W095 | 0.992   | 1.292 | 06-jun-2008 | SCSM | IOS/SCEA |
| 102.617 | 32.010 | 19.137   | -11.415 | 0.450 | 0.215 | -0.022 | W096 | -0.416  | 0.803 | 14-jun-2008 | SCSM | IOS/SCEA |
| 102.779 | 31.674 | 34.394   | -20.644 | 0.349 | 0.192 | 0.043  | W098 | 6.587   | 0.713 | 12-jun-2008 | SCSM | IOS/SCEA |
| 102.911 | 31.527 | 48.943   | -21.735 | 0.565 | 0.270 | 0.255  | W101 | 5.751   | 1.006 | 11-jun-2008 | SCSM | IOS/SCEA |
| 102.118 | 31.009 | 10.199   | -1.379  | 0.621 | 0.310 | -0.177 | W103 | -1.006  | 1.221 | 15-jun-2008 | SCSM | IOS/SCEA |
| 103.424 | 31.930 | 30.488   | -12.638 | 0.504 | 0.234 | 0.444  | W104 | 1.183   | 0.977 | 20-jun-2008 | SCSM | IOS/SCEA |
| 103.694 | 31.841 | 43.326   | -2.121  | 0.393 | 0.310 | 0.114  | W105 | 0.800   | 1.034 | 21-jun-2008 | SCSM | IOS/SCEA |
| 103.445 | 31.557 | 69.701   | -16.733 | 0.555 | 0.229 | 0.181  | W106 | 0.168   | 0.759 | 18-jun-2008 | SCSM | IOS/SCEA |
| 103.820 | 31.659 | 70.840   | 18.696  | 0.451 | 0.194 | -0.177 | W107 | -2.141  | 0.724 | 18-jun-2008 | SCSM | IOS/SCEA |
| 103.165 | 31.443 | 74.584   | -41.411 | 0.455 | 0.214 | 0.223  | W108 | 8.779   | 0.768 | 18-jun-2008 | SCSM | IOS/SCEA |
| 103.485 | 31.253 | 225.133  | -26.177 | 0.895 | 0.696 | 0.023  | W109 | 15.507  | 1.674 | 11-sep-2008 | SCSM | IOS/SCEA |
| 103.812 | 31.167 | -162.246 | 36.339  | 0.296 | 0.166 | 0.110  | W110 | -8.103  | 0.598 | 09-jun-2008 | SCSM | IOS/SCEA |
| 103.177 | 31.028 | 72.005   | -26.598 | 0.551 | 0.272 | -0.076 | W111 | -6.010  | 0.841 | 09-jun-2008 | SCSM | IOS/SCEA |
| 103.469 | 31.036 | 177.781  | -94.407 | 0.410 | 0.153 | -0.067 | W112 | 61.332  | 0.696 | 04-jun-2008 | SCSM | IOS/SCEA |

|         |        |          |        |       |       |        |      |         |       |             |      |          |
|---------|--------|----------|--------|-------|-------|--------|------|---------|-------|-------------|------|----------|
| 103.979 | 31.080 | -69.117  | 32.720 | 0.133 | 0.100 | 0.020  | W113 | -5.322  | 0.275 | 02-jun-2008 | SCSM | IOS/SCEA |
| 104.667 | 31.980 | -173.804 | 12.953 | 0.270 | 0.142 | -0.059 | W114 | -40.835 | 0.520 | 30-jun-2008 | SCSM | IOS/SCEA |
| 104.574 | 31.870 | -203.576 | 37.217 | 0.375 | 0.177 | -0.266 | W115 | -51.697 | 0.677 | 02-jul-2008 | SCSM | IOS/SCEA |
| 104.721 | 31.902 | -97.957  | -5.864 | 0.330 | 0.152 | 0.021  | W116 | -3.410  | 0.841 | 07-may-2008 | SCSM | IOS/SCEA |
| 104.142 | 31.797 | 127.195  | 19.564 | 0.388 | 0.201 | -0.180 | W117 | -2.748  | 0.836 | 20-jun-2008 | SCSM | IOS/SCEA |
| 104.737 | 31.852 | -82.745  | 1.648  | 0.589 | 0.497 | 0.040  | W118 | -1.325  | 1.155 | 07-jul-2008 | SCSM | IOS/SCEA |
| 104.863 | 31.834 | -49.715  | -5.615 | 0.206 | 0.107 | -0.049 | W119 | -4.853  | 0.357 | 18-jun-2008 | SCSM | IOS/SCEA |
| 104.933 | 31.781 | -36.949  | -5.323 | 0.301 | 0.134 | -0.124 | W120 | -4.433  | 0.482 | 20-jun-2008 | SCSM | IOS/SCEA |
| 104.698 | 31.727 | -63.369  | 13.993 | 0.195 | 0.101 | -0.053 | W121 | -19.266 | 0.338 | 16-jun-2008 | SCSM | IOS/SCEA |
| 104.445 | 31.689 | -95.225  | 45.050 | 0.246 | 0.126 | -0.051 | W122 | -48.626 | 0.465 | 30-may-2008 | SCSM | IOS/SCEA |
| 104.354 | 31.562 | -88.493  | 19.706 | 0.259 | 0.131 | -0.073 | W123 | -16.107 | 0.472 | 22-jun-2008 | SCSM | IOS/SCEA |
| 104.731 | 31.636 | -48.396  | 6.303  | 0.313 | 0.142 | -0.116 | W124 | -3.254  | 0.504 | 07-jul-2008 | SCSM | IOS/SCEA |
| 104.944 | 31.655 | -30.295  | -1.216 | 0.304 | 0.139 | -0.126 | W125 | -3.343  | 0.506 | 05-jul-2008 | SCSM | IOS/SCEA |
| 104.250 | 31.510 | -122.827 | 37.529 | 0.294 | 0.137 | -0.112 | W126 | -23.180 | 0.513 | 30-may-2008 | SCSM | IOS/SCEA |
| 104.531 | 31.560 | -56.541  | 15.254 | 0.228 | 0.117 | -0.069 | W127 | -10.218 | 0.422 | 29-jun-2008 | SCSM | IOS/SCEA |
| 104.855 | 31.561 | -31.658  | 2.670  | 0.439 | 0.274 | 0.111  | W129 | -9.028  | 1.031 | 03-jul-2008 | SCSM | IOS/SCEA |
| 104.965 | 31.544 | -23.327  | 0.783  | 0.231 | 0.113 | -0.090 | W130 | -2.403  | 0.391 | 03-jul-2008 | SCSM | IOS/SCEA |
| 104.509 | 31.453 | -48.016  | 10.595 | 0.341 | 0.139 | -0.116 | W131 | -1.778  | 0.514 | 01-jul-2008 | SCSM | IOS/SCEA |
| 104.601 | 31.446 | -37.245  | 11.711 | 0.295 | 0.142 | -0.087 | W132 | -6.500  | 0.515 | 25-jun-2008 | SCSM | IOS/SCEA |
| 104.299 | 31.403 | -78.679  | 23.741 | 0.305 | 0.136 | -0.026 | W133 | -9.027  | 0.520 | 29-jun-2008 | SCSM | IOS/SCEA |
| 104.548 | 31.396 | -37.631  | 9.379  | 0.293 | 0.133 | -0.117 | W134 | -6.940  | 0.472 | 14-jun-2008 | SCSM | IOS/SCEA |
| 104.798 | 31.377 | -24.710  | 4.947  | 0.226 | 0.113 | -0.085 | W135 | -3.079  | 0.396 | 30-jun-2008 | SCSM | IOS/SCEA |
| 104.236 | 31.287 | -63.758  | 23.502 | 0.258 | 0.114 | -0.068 | W136 | -4.321  | 0.422 | 10-jun-2008 | SCSM | IOS/SCEA |
| 104.498 | 31.286 | -39.683  | 11.978 | 0.284 | 0.133 | -0.113 | W137 | -1.417  | 0.478 | 07-jun-2008 | SCSM | IOS/SCEA |
| 104.738 | 31.297 | -24.039  | 5.119  | 0.323 | 0.150 | -0.129 | W138 | -0.392  | 0.582 | 30-jun-2008 | SCSM | IOS/SCEA |
| 104.867 | 31.301 | -19.731  | 3.660  | 0.357 | 0.162 | -0.207 | W139 | -0.418  | 0.589 | 30-jun-2008 | SCSM | IOS/SCEA |
| 104.400 | 31.211 | -37.104  | 11.242 | 0.223 | 0.111 | -0.106 | W140 | -8.287  | 0.389 | 02-jun-2008 | SCSM | IOS/SCEA |
| 104.857 | 31.118 | -17.391  | 2.991  | 0.345 | 0.147 | -0.076 | W141 | -1.433  | 0.586 | 30-jun-2008 | SCSM | IOS/SCEA |
| 104.992 | 31.184 | -15.667  | 3.966  | 0.353 | 0.161 | -0.137 | W142 | -3.230  | 0.625 | 30-jun-2008 | SCSM | IOS/SCEA |
| 104.136 | 31.085 | -47.994  | 19.040 | 0.313 | 0.147 | -0.188 | W143 | -0.805  | 0.542 | 02-jun-2008 | SCSM | IOS/SCEA |
| 104.359 | 31.106 | -32.684  | 11.155 | 0.241 | 0.114 | -0.104 | W144 | -4.416  | 0.402 | 29-may-2008 | SCSM | IOS/SCEA |
| 104.536 | 31.134 | -25.714  | 7.102  | 0.269 | 0.119 | -0.125 | W145 | 0.060   | 0.431 | 31-may-2008 | SCSM | IOS/SCEA |
| 104.212 | 31.053 | -38.503  | 15.823 | 0.255 | 0.118 | -0.087 | W146 | -2.240  | 0.434 | 08-jun-2008 | SCSM | IOS/SCEA |
| 104.683 | 31.049 | -18.181  | 5.320  | 0.234 | 0.114 | -0.074 | W148 | -1.876  | 0.399 | 25-jun-2008 | SCSM | IOS/SCEA |
| 104.996 | 31.093 | -13.859  | 2.605  | 0.332 | 0.149 | -0.201 | W149 | -1.918  | 0.604 | 30-jun-2008 | SCSM | IOS/SCEA |
| 105.298 | 31.944 | -23.118  | 1.310  | 0.332 | 0.141 | -0.118 | W150 | -2.762  | 0.515 | 05-jul-2008 | SCSM | IOS/SCEA |
| 105.488 | 31.920 | -18.047  | 4.220  | 0.296 | 0.139 | -0.123 | W151 | -0.231  | 0.519 | 04-jul-2008 | SCSM | IOS/SCEA |
| 105.896 | 31.994 | -12.506  | 2.274  | 0.322 | 0.142 | -0.081 | W152 | 0.078   | 0.524 | 04-jul-2008 | SCSM | IOS/SCEA |
| 105.563 | 31.846 | -15.305  | 2.491  | 0.248 | 0.123 | -0.078 | W153 | -0.807  | 0.450 | 02-jul-2008 | SCSM | IOS/SCEA |
| 105.102 | 31.813 | -25.825  | -4.165 | 0.308 | 0.138 | -0.115 | W154 | -0.266  | 0.494 | 05-jul-2008 | SCSM | IOS/SCEA |
| 105.066 | 31.711 | -24.785  | -2.275 | 0.304 | 0.138 | -0.114 | W155 | -1.664  | 0.501 | 03-jul-2008 | SCSM | IOS/SCEA |

|         |        |          |        |       |       |        |      |         |       |             |      |          |
|---------|--------|----------|--------|-------|-------|--------|------|---------|-------|-------------|------|----------|
| 105.204 | 31.758 | -20.638  | -1.469 | 0.345 | 0.165 | -0.125 | W156 | -1.826  | 0.598 | 03-jul-2008 | SCSM | IOS/SCEA |
| 105.596 | 31.747 | -12.517  | 1.963  | 0.278 | 0.135 | -0.090 | W157 | -0.245  | 0.484 | 02-jul-2008 | SCSM | IOS/SCEA |
| 105.947 | 31.844 | -11.796  | 2.754  | 0.460 | 0.168 | -0.142 | W158 | -1.364  | 0.903 | 30-may-2008 | SCSM | IOS/SCEA |
| 105.168 | 31.656 | -19.802  | -0.612 | 0.331 | 0.142 | -0.115 | W159 | -2.838  | 0.517 | 05-jul-2008 | SCSM | IOS/SCEA |
| 105.514 | 31.627 | -12.362  | 1.211  | 0.301 | 0.138 | -0.080 | W160 | 3.736   | 0.518 | 02-jul-2008 | SCSM | IOS/SCEA |
| 105.102 | 31.592 | -20.766  | -1.158 | 0.251 | 0.122 | -0.100 | W161 | -0.445  | 0.453 | 07-jul-2008 | SCSM | IOS/SCEA |
| 105.185 | 31.536 | -16.855  | 1.103  | 0.341 | 0.144 | -0.130 | W162 | -2.563  | 0.537 | 29-jun-2008 | SCSM | IOS/SCEA |
| 105.360 | 31.562 | -13.017  | 0.458  | 0.336 | 0.148 | -0.151 | W163 | -0.994  | 0.534 | 29-jun-2008 | SCSM | IOS/SCEA |
| 105.712 | 31.624 | -7.524   | -0.624 | 0.326 | 0.142 | -0.102 | W164 | 5.267   | 0.522 | 07-jul-2008 | SCSM | IOS/SCEA |
| 105.039 | 31.317 | -16.802  | 2.016  | 0.310 | 0.140 | -0.113 | W167 | -0.774  | 0.509 | 01-jul-2008 | SCSM | IOS/SCEA |
| 105.159 | 31.392 | -16.135  | 1.470  | 0.302 | 0.138 | -0.116 | W168 | -1.238  | 0.522 | 01-jul-2008 | SCSM | IOS/SCEA |
| 105.291 | 31.382 | -13.157  | 1.080  | 0.279 | 0.129 | -0.112 | W169 | 2.262   | 0.480 | 07-jul-2008 | SCSM | IOS/SCEA |
| 105.554 | 31.326 | -7.890   | 0.031  | 0.300 | 0.141 | -0.048 | W170 | 3.123   | 0.539 | 08-jul-2008 | SCSM | IOS/SCEA |
| 105.271 | 31.233 | -11.079  | 1.515  | 0.518 | 0.219 | -0.018 | W172 | 18.136  | 1.037 | 04-jul-2008 | SCSM | IOS/SCEA |
| 105.128 | 31.168 | -13.649  | -1.076 | 0.454 | 0.171 | -0.186 | W173 | -9.176  | 0.722 | 04-jul-2008 | SCSM | IOS/SCEA |
| 105.400 | 31.249 | -9.357   | 1.681  | 0.252 | 0.118 | -0.048 | W174 | 2.300   | 0.438 | 06-jul-2008 | SCSM | IOS/SCEA |
| 105.916 | 31.325 | -6.515   | 0.974  | 0.414 | 0.184 | -0.212 | W175 | -2.544  | 0.728 | 02-jul-2008 | SCSM | IOS/SCEA |
| 105.170 | 31.005 | -10.315  | 3.910  | 0.448 | 0.183 | 0.149  | W177 | 6.074   | 0.617 | 06-jul-2008 | SCSM | IOS/SCEA |
| 106.389 | 31.995 | -10.109  | 2.825  | 0.468 | 0.236 | 0.195  | W178 | 2.217   | 1.382 | 03-jul-2008 | SCSM | IOS/SCEA |
| 106.152 | 31.894 | -7.293   | 0.633  | 0.311 | 0.162 | 0.119  | W179 | 4.736   | 0.602 | 05-jul-2008 | SCSM | IOS/SCEA |
| 106.024 | 31.801 | -7.727   | 2.780  | 0.383 | 0.186 | 0.189  | W180 | -0.422  | 0.647 | 05-jul-2008 | SCSM | IOS/SCEA |
| 102.635 | 30.968 | 24.835   | -1.436 | 0.842 | 0.248 | 0.080  | W235 | -0.775  | 0.976 | 07-jun-2008 | SCSM | IOS/SCEA |
| 102.747 | 30.722 | 11.021   | 0.796  | 0.409 | 0.240 | -0.019 | W237 | -4.896  | 1.007 | 07-jun-2008 | SCSM | IOS/SCEA |
| 102.913 | 30.508 | 0.624    | -4.071 | 0.506 | 0.318 | -0.051 | W238 | -0.518  | 1.471 | 05-jun-2008 | SCSM | IOS/SCEA |
| 102.775 | 30.409 | 1.254    | -2.489 | 0.535 | 0.206 | -0.074 | W239 | -2.891  | 0.800 | 05-jun-2008 | SCSM | IOS/SCEA |
| 103.662 | 31.008 | -101.988 | 72.751 | 0.319 | 0.134 | -0.029 | W243 | -13.906 | 0.523 | 29-may-2008 | SCSM | IOS/SCEA |
| 103.794 | 30.981 | -75.770  | 45.910 | 0.340 | 0.144 | -0.046 | W244 | -4.895  | 0.563 | 31-may-2008 | SCSM | IOS/SCEA |
| 103.901 | 30.981 | -62.997  | 35.609 | 0.248 | 0.111 | -0.025 | W245 | -4.292  | 0.391 | 31-may-2008 | SCSM | IOS/SCEA |
| 103.578 | 30.866 | -39.540  | 36.513 | 0.284 | 0.131 | -0.040 | W246 | -15.070 | 0.476 | 01-jun-2008 | SCSM | IOS/SCEA |
| 103.703 | 30.929 | -65.412  | 49.208 | 0.364 | 0.165 | -0.064 | W247 | -12.784 | 0.625 | 29-may-2008 | SCSM | IOS/SCEA |
| 103.831 | 30.850 | -40.587  | 28.613 | 0.311 | 0.132 | -0.035 | W248 | -2.837  | 0.491 | 29-may-2008 | SCSM | IOS/SCEA |
| 103.939 | 30.775 | -26.451  | 19.865 | 0.346 | 0.138 | -0.072 | W249 | -8.067  | 0.501 | 29-may-2008 | SCSM | IOS/SCEA |
| 103.506 | 30.734 | -11.793  | 13.713 | 0.401 | 0.168 | -0.005 | W250 | -7.801  | 0.800 | 04-jun-2008 | SCSM | IOS/SCEA |
| 103.861 | 30.704 | -23.024  | 16.848 | 0.311 | 0.135 | -0.048 | W251 | -1.873  | 0.506 | 04-jun-2008 | SCSM | IOS/SCEA |
| 103.954 | 30.597 | -15.179  | 11.720 | 0.245 | 0.112 | -0.041 | W252 | -3.808  | 0.395 | 19-jun-2008 | SCSM | IOS/SCEA |
| 103.480 | 30.530 | -6.155   | 4.202  | 0.346 | 0.149 | -0.007 | W254 | -5.610  | 0.565 | 17-jun-2008 | SCSM | IOS/SCEA |
| 103.638 | 30.486 | -7.922   | 7.495  | 0.304 | 0.133 | -0.021 | W255 | -4.255  | 0.500 | 17-jun-2008 | SCSM | IOS/SCEA |
| 103.763 | 30.430 | -7.603   | 6.275  | 0.317 | 0.138 | -0.041 | W256 | -1.996  | 0.517 | 17-jun-2008 | SCSM | IOS/SCEA |
| 103.335 | 30.362 | -3.354   | -0.329 | 0.325 | 0.148 | -0.037 | W257 | -4.246  | 0.569 | 13-jun-2008 | SCSM | IOS/SCEA |
| 103.586 | 30.371 | -5.508   | 3.963  | 0.321 | 0.149 | -0.014 | W258 | -3.084  | 0.551 | 15-jun-2008 | SCSM | IOS/SCEA |
| 103.874 | 30.393 | -6.727   | 4.503  | 0.312 | 0.136 | -0.027 | W259 | -0.838  | 0.494 | 17-jun-2008 | SCSM | IOS/SCEA |



|         |        |         |        |       |       |        |      |        |       |             |      |          |
|---------|--------|---------|--------|-------|-------|--------|------|--------|-------|-------------|------|----------|
| 103.510 | 30.309 | -3.640  | 2.118  | 0.233 | 0.110 | -0.028 | W260 | -3.921 | 0.389 | 13-jun-2008 | SCSM | IOS/SCEA |
| 103.718 | 30.328 | -5.352  | 5.081  | 0.343 | 0.140 | -0.047 | W261 | -0.843 | 0.543 | 15-jun-2008 | SCSM | IOS/SCEA |
| 103.311 | 30.228 | -2.562  | -1.310 | 0.332 | 0.141 | -0.018 | W262 | 2.924  | 0.543 | 11-jun-2008 | SCSM | IOS/SCEA |
| 103.496 | 30.221 | 1.403   | 2.708  | 0.346 | 0.157 | -0.102 | W263 | -0.675 | 0.584 | 13-jun-2008 | SCSM | IOS/SCEA |
| 103.609 | 30.269 | -5.068  | 2.747  | 0.206 | 0.102 | -0.028 | W264 | -4.964 | 0.357 | 15-jun-2008 | SCSM | IOS/SCEA |
| 103.872 | 30.261 | -5.402  | 3.686  | 0.308 | 0.133 | -0.044 | W265 | -3.043 | 0.503 | 15-jun-2008 | SCSM | IOS/SCEA |
| 103.897 | 30.173 | -5.778  | 3.430  | 0.341 | 0.138 | -0.070 | W266 | -1.960 | 0.529 | 15-jun-2008 | SCSM | IOS/SCEA |
| 103.294 | 30.134 | -1.874  | -0.963 | 0.307 | 0.133 | -0.037 | W267 | -3.103 | 0.492 | 11-jun-2008 | SCSM | IOS/SCEA |
| 103.484 | 30.094 | -3.155  | 0.445  | 0.346 | 0.139 | -0.071 | W268 | -3.719 | 0.537 | 11-jun-2008 | SCSM | IOS/SCEA |
| 103.624 | 30.051 | -2.584  | 2.049  | 0.380 | 0.162 | -0.044 | W269 | -3.223 | 0.741 | 11-jun-2008 | SCSM | IOS/SCEA |
| 103.712 | 30.052 | -3.293  | 1.624  | 0.243 | 0.114 | -0.074 | W270 | -3.985 | 0.416 | 15-jun-2008 | SCSM | IOS/SCEA |
| 103.960 | 30.032 | -7.724  | 2.075  | 0.312 | 0.136 | -0.095 | W271 | -2.411 | 0.519 | 13-jun-2008 | SCSM | IOS/SCEA |
| 103.501 | 30.011 | -3.034  | 0.845  | 0.304 | 0.133 | -0.041 | W272 | -3.322 | 0.490 | 11-jun-2008 | SCSM | IOS/SCEA |
| 104.063 | 30.023 | -4.724  | 1.562  | 0.327 | 0.135 | -0.075 | W273 | -1.844 | 0.492 | 13-jun-2008 | SCSM | IOS/SCEA |
| 104.292 | 30.976 | -29.279 | 9.890  | 0.319 | 0.125 | -0.083 | W274 | -4.255 | 0.461 | 27-jun-2008 | SCSM | IOS/SCEA |
| 104.216 | 30.896 | -29.566 | 12.944 | 0.315 | 0.139 | -0.023 | W275 | -2.643 | 0.530 | 28-jun-2008 | SCSM | IOS/SCEA |
| 104.499 | 30.931 | -19.678 | 7.408  | 0.220 | 0.108 | -0.027 | W276 | -2.770 | 0.380 | 25-jun-2008 | SCSM | IOS/SCEA |
| 104.815 | 30.962 | -15.810 | 3.247  | 0.500 | 0.176 | -0.070 | W277 | -1.408 | 0.685 | 27-jun-2008 | SCSM | IOS/SCEA |
| 104.732 | 30.928 | -14.520 | 4.541  | 0.308 | 0.132 | -0.044 | W278 | -1.392 | 0.479 | 27-jun-2008 | SCSM | IOS/SCEA |
| 104.932 | 30.888 | -11.139 | 1.621  | 0.303 | 0.130 | -0.062 | W279 | -1.190 | 0.461 | 28-jun-2008 | SCSM | IOS/SCEA |
| 104.067 | 30.865 | -32.591 | 18.374 | 0.321 | 0.142 | -0.012 | W280 | -5.871 | 0.536 | 27-jun-2008 | SCSM | IOS/SCEA |
| 104.375 | 30.870 | -21.719 | 9.670  | 0.234 | 0.115 | -0.090 | W281 | -1.403 | 0.431 | 23-jun-2008 | SCSM | IOS/SCEA |
| 104.577 | 30.877 | -16.968 | 5.569  | 0.257 | 0.123 | -0.033 | W282 | -2.727 | 0.429 | 23-jun-2008 | SCSM | IOS/SCEA |
| 104.152 | 30.799 | -22.878 | 14.783 | 0.303 | 0.132 | -0.035 | W283 | -2.790 | 0.484 | 19-jun-2008 | SCSM | IOS/SCEA |
| 104.864 | 30.795 | -13.073 | 3.407  | 0.332 | 0.139 | -0.064 | W284 | -1.575 | 0.513 | 25-jun-2008 | SCSM | IOS/SCEA |
| 104.078 | 30.737 | -26.342 | 11.474 | 0.458 | 0.183 | -0.101 | W285 | -4.797 | 0.838 | 21-jun-2008 | SCSM | IOS/SCEA |
| 104.298 | 30.746 | -18.880 | 9.909  | 0.252 | 0.115 | -0.005 | W286 | -2.418 | 0.417 | 21-jun-2008 | SCSM | IOS/SCEA |
| 104.523 | 30.725 | -14.900 | 6.488  | 0.315 | 0.140 | -0.046 | W287 | -0.718 | 0.510 | 23-jun-2008 | SCSM | IOS/SCEA |
| 104.690 | 30.780 | -12.800 | 4.758  | 0.233 | 0.111 | -0.060 | W288 | -0.602 | 0.381 | 23-jun-2008 | SCSM | IOS/SCEA |
| 104.942 | 30.749 | -8.865  | 3.452  | 0.330 | 0.136 | -0.075 | W289 | -1.578 | 0.490 | 25-jun-2008 | SCSM | IOS/SCEA |
| 104.026 | 30.677 | -19.633 | 12.805 | 0.285 | 0.142 | -0.053 | W290 | -5.082 | 0.591 | 19-jun-2008 | SCSM | IOS/SCEA |
| 104.827 | 30.727 | -10.820 | 3.087  | 0.210 | 0.106 | -0.049 | W291 | 7.468  | 0.356 | 23-jun-2008 | SCSM | IOS/SCEA |
| 104.891 | 30.691 | -8.599  | 3.051  | 0.327 | 0.138 | -0.077 | W292 | -1.221 | 0.496 | 25-jun-2008 | SCSM | IOS/SCEA |
| 104.212 | 30.705 | -19.428 | 10.887 | 0.314 | 0.131 | -0.039 | W293 | 1.174  | 0.479 | 21-jun-2008 | SCSM | IOS/SCEA |
| 104.396 | 30.633 | -13.160 | 6.795  | 0.368 | 0.151 | -0.058 | W294 | -2.722 | 0.557 | 19-jun-2008 | SCSM | IOS/SCEA |
| 104.639 | 30.614 | -10.492 | 5.470  | 0.307 | 0.133 | -0.046 | W295 | -0.800 | 0.487 | 21-jun-2008 | SCSM | IOS/SCEA |
| 104.741 | 30.620 | -8.826  | 1.705  | 0.318 | 0.133 | -0.046 | W296 | -0.427 | 0.484 | 21-jun-2008 | SCSM | IOS/SCEA |
| 104.928 | 30.611 | -5.656  | 3.273  | 0.326 | 0.135 | -0.066 | W297 | -0.838 | 0.485 | 21-jun-2008 | SCSM | IOS/SCEA |
| 104.179 | 30.589 | -14.845 | 9.243  | 0.357 | 0.154 | -0.082 | W298 | -3.865 | 0.621 | 19-jun-2008 | SCSM | IOS/SCEA |
| 103.985 | 30.531 | -12.400 | 9.673  | 0.304 | 0.132 | -0.037 | W299 | -3.408 | 0.501 | 17-jun-2008 | SCSM | IOS/SCEA |
| 104.073 | 30.463 | -10.609 | 7.597  | 0.311 | 0.131 | -0.029 | W300 | -3.449 | 0.486 | 17-jun-2008 | SCSM | IOS/SCEA |

|         |        |         |        |       |       |        |      |         |       |             |      |          |
|---------|--------|---------|--------|-------|-------|--------|------|---------|-------|-------------|------|----------|
| 104.302 | 30.554 | -10.848 | 7.920  | 0.389 | 0.172 | 0.015  | W301 | -2.695  | 0.717 | 19-jun-2008 | SCSM | IOS/SCEA |
| 104.525 | 30.539 | -10.258 | 4.335  | 0.357 | 0.150 | -0.025 | W303 | -0.361  | 0.544 | 09-jul-2008 | SCSM | IOS/SCEA |
| 104.621 | 30.505 | -9.361  | 3.024  | 0.357 | 0.152 | -0.021 | W304 | 0.483   | 0.556 | 09-jul-2008 | SCSM | IOS/SCEA |
| 105.054 | 30.953 | -10.630 | 0.974  | 0.416 | 0.175 | 0.155  | W328 | 3.976   | 0.618 | 08-jul-2008 | SCSM | IOS/SCEA |
| 104.567 | 31.706 | -89.616 | 20.660 | 0.354 | 0.160 | -0.089 | ZISH | -15.862 | 0.660 | 09-jul-2008 | SCSM | IOS/SCEA |

#  
#

# Triangulation sites, resurveyed with GPS after the earthquake (33 sites )

| #       | Long.  | Lat.     | EW      | SN    | Sew   | Sns    | coff. | Name | Up | Sup | Survey Date | Agency        |
|---------|--------|----------|---------|-------|-------|--------|-------|------|----|-----|-------------|---------------|
| #       | deg    | deg      | cm      | cm    | cm    | cm     |       |      |    |     |             |               |
| 104.018 | 31.266 | -116.490 | 49.603  | 6.255 | 5.469 | 0.395  | FDSH  |      |    |     | 08-apr-2009 | SCSM WHU/SCEA |
| 104.533 | 32.332 | 53.337   | 24.718  | 6.108 | 5.439 | 0.471  | JIFD  |      |    |     | 10-apr-2009 | SCSM WHU/SCEA |
| 104.620 | 32.050 | 88.183   | 162.936 | 6.469 | 5.473 | -0.008 | BAJS  |      |    |     | 14-apr-2009 | SCSM WHU/SCEA |
| 105.174 | 32.543 | 57.914   | 105.034 | 7.148 | 5.944 | -0.337 | QIYS  |      |    |     | 01-jun-2009 | SCSM WHU/SCEA |
| 105.181 | 32.125 | -56.677  | -3.034  | 6.523 | 5.520 | 0.344  | WUHD  |      |    |     | 12-mar-2009 | SCSM WHU/SCEA |
| 105.014 | 32.070 | -59.986  | -21.720 | 6.293 | 5.572 | 0.090  | LIZS  |      |    |     | 16-mar-2009 | SCSM WHU/SCEA |
| 104.911 | 32.059 | -70.391  | -27.110 | 7.485 | 6.016 | 0.737  | TAWZ  |      |    |     | 18-mar-2009 | SCSM WHU/SCEA |
| 103.564 | 30.951 | -65.697  | 44.779  | 6.845 | 5.660 | -0.388 | WONS  |      |    |     | 20-mar-2009 | SCSM WHU/SCEA |
| 103.516 | 30.976 | -82.435  | 48.645  | 6.183 | 5.459 | 0.473  | ZAOG  |      |    |     | 18-mar-2009 | SCSM WHU/SCEA |
| 104.772 | 32.111 | -149.841 | -21.892 | 5.871 | 5.344 | 0.162  | MAEZ  |      |    |     | 31-may-2009 | SCSM WHU/SCEA |
| 104.736 | 32.132 | 139.445  | 105.331 | 6.876 | 5.894 | 0.753  | LOWB  |      |    |     | 20-mar-2009 | SCSM WHU/SCEA |
| 103.656 | 31.145 | 542.720  | -30.883 | 6.173 | 5.434 | 0.401  | YBSH  |      |    |     | 21-mar-2009 | SCSM WHU/SCEA |
| 103.829 | 31.083 | -106.441 | 49.383  | 6.170 | 5.573 | -0.084 | SZHT  |      |    |     | 23-mar-2009 | SCSM WHU/SCEA |
| 103.920 | 31.166 | -124.050 | 50.898  | 6.482 | 5.586 | 0.616  | JFDI  |      |    |     | 24-mar-2009 | SCSM WHU/SCEA |
| 104.885 | 32.526 | 44.531   | 21.652  | 7.412 | 5.901 | 0.727  | BAGL  |      |    |     | 24-mar-2009 | SCSM WHU/SCEA |
| 104.356 | 31.707 | 284.873  | -40.829 | 6.339 | 5.463 | 0.375  | YTSH  |      |    |     | 11-may-2009 | SCSM WHU/SCEA |
| 104.461 | 32.087 | 64.665   | 54.758  | 7.236 | 6.433 | 0.721  | DOZD  |      |    |     | 12-may-2009 | SCSM WHU/SCEA |
| 104.227 | 31.616 | -176.824 | 35.151  | 6.048 | 5.501 | 0.348  | YEHC  |      |    |     | 15-may-2009 | SCSM WHU/SCEA |
| 104.337 | 32.206 | 48.140   | -0.303  | 7.076 | 5.963 | 0.302  | DAXD  |      |    |     | 15-may-2009 | SCSM WHU/SCEA |
| 104.087 | 31.446 | -66.851  | 49.880  | 6.746 | 5.486 | 0.451  | BYSH  |      |    |     | 14-apr-2009 | SCSM WHU/SCEA |
| 104.183 | 31.562 | -138.604 | 77.319  | 6.036 | 5.492 | 0.346  | DABY  |      |    |     | 16-may-2009 | SCSM WHU/SCEA |
| 104.457 | 31.929 | 228.801  | 83.791  | 6.381 | 5.485 | 0.447  | ROHS  |      |    |     | 18-may-2009 | SCSM WHU/SCEA |
| 104.348 | 31.922 | 126.812  | 83.141  | 7.069 | 5.539 | 0.359  | YPNK  |      |    |     | 20-may-2009 | SCSM WHU/SCEA |
| 104.212 | 31.743 | 156.389  | 47.549  | 5.945 | 5.489 | 0.402  | QFSH  |      |    |     | 20-may-2009 | SCSM WHU/SCEA |
| 104.249 | 31.866 | 145.649  | -21.176 | 5.870 | 5.459 | 0.427  | HECT  |      |    |     | 23-may-2009 | SCSM WHU/SCEA |
| 104.097 | 32.127 | 69.637   | -31.144 | 6.726 | 5.726 | -0.271 | JIJS  |      |    |     | 28-may-2009 | SCSM WHU/SCEA |
| 105.482 | 32.646 | 6.644    | 8.025   | 6.213 | 5.503 | -0.463 | CSHY  |      |    |     | 28-may-2009 | SCSM WHU/SCEA |
| 105.294 | 32.659 | 49.322   | 52.261  | 5.816 | 5.419 | 0.006  | HLAS  |      |    |     | 29-may-2009 | SCSM WHU/SCEA |

|         |        |          |         |       |       |        |      |             |      |          |
|---------|--------|----------|---------|-------|-------|--------|------|-------------|------|----------|
| 105.026 | 32.551 | 60.546   | 76.989  | 6.855 | 5.737 | -0.336 | LJZH | 30-may-2009 | SCSM | WHU/SCEA |
| 105.123 | 32.470 | 40.166   | 122.857 | 6.010 | 5.620 | 0.533  | QSHZ | 31-may-2009 | SCSM | WHU/SCEA |
| 104.163 | 31.128 | -55.263  | 22.458  | 7.222 | 5.707 | 0.004  | SHIF | 31-may-2009 | SCSM | IOS      |
| 104.485 | 31.608 | -69.964  | 21.261  | 7.051 | 5.912 | -0.323 | YNSH | 31-may-2009 | SCSM | IOS      |
| 104.235 | 31.453 | -124.520 | 35.973  | 6.698 | 5.804 | -0.301 | GXIN | 31-may-2009 | SCSM | IOS      |

#

# The contribution from crews at the following agencies is greatly acknowledged

#

# CMONOC: Crustal Movement Observation Networks of China ( A consortium of CEA, NBSM, CAS, NBSM, CMA & DOE).

# IOS : Institute of Seismology , China Earthquake Administration, Wuhan,

# Hubei Earthquake Administration, Wuhan, and Chinese University of Geosciences, Wuhan

# SBSM : Sichuan Bureau of Surveying and Mapping, Chengdu

# SCEA : Sichuan Earthquake Administration, Chengdu

# SDMC : Second Crustal Deformation Monitoring Center, China Earthquake Administration

# YNEA : Yunnan Earthquake Administration, Kunming

# SXSM : Shanxi Bureau of Surveying and Mapping, Xian

# WHU : Wuhan University, Wuhan

# CQEA : Chongqing Earthquake Administration

# FSDI : First Survey & Design Institute of China Railways, Xian

# IOG : Institute of Geology, China Earthquake Administration, Beijing

#

#

# Spirit levelling (42 points) surveyed by SXSM before the earthquake Resurvey by SDMC in

# (1) September 2008, (2) May 2009. The data are from

#

# Wang, Q.-L. *et al.* Coseismic vertical deformation of the Ms8.0 Wenchuan earthquake from repeated levelings

# and its constraint on listric fault geometry, *Earthquake Science* **22**, 595-602 (2009)

#

# Part (1)

#

# Lat. Long. route Marker

# Vertical length No.

| #      |         | (m)     |       |      |                |
|--------|---------|---------|-------|------|----------------|
| 32.410 | 104.525 | 0.0000  | 0.0   | PB02 | Starting point |
| 32.388 | 104.554 | -0.0257 | 6.1   | PB03 |                |
| 32.385 | 104.620 | -0.0438 | 14.3  | PB05 |                |
| 32.374 | 104.650 | -0.1080 | 19.4  | PB06 |                |
| 32.343 | 104.670 | -0.0683 | 22.4  | PB07 |                |
| 32.343 | 104.685 | -0.0450 | 26.4  | BY01 |                |
| 32.323 | 104.721 | -0.0535 | 31.4  | BY03 |                |
| 32.295 | 104.764 | 0.0696  | 37.7  | BY05 |                |
| 32.215 | 104.820 | 1.0030  | 54.0  | BY11 |                |
| 32.098 | 104.787 | -0.3777 | 68.5  | BY14 |                |
| 32.069 | 104.772 | -0.2877 | 71.7  | BY15 |                |
| 32.043 | 104.748 | -0.3025 | 75.2  | BY16 |                |
| 32.038 | 104.736 | -0.3928 | 78.8  | BY17 |                |
| 32.003 | 104.677 | -0.5815 | 88.8  | BY20 |                |
| 31.936 | 104.609 | -0.6196 | 103.5 | BY07 |                |
| 31.863 | 104.537 | -0.5040 | 116.9 | BY03 |                |
| 31.851 | 104.456 | 4.7114  | 125.5 | BY01 |                |
| 31.663 | 104.442 | -0.2021 | 147.4 | BG06 |                |
| 31.630 | 104.395 | -0.1616 | 155.8 | BG08 |                |
| 31.560 | 104.331 | -0.1605 | 166.2 | BG11 |                |
| 31.445 | 104.336 | -0.0878 | 180.7 | BG15 |                |
| 31.383 | 104.228 | -0.0933 | 188.5 | BG17 |                |
| 31.356 | 104.263 | -0.1028 | 193.5 | BG18 |                |
| 31.972 | 104.647 | -0.5045 | 94.7  | BG20 |                |
| 31.338 | 104.190 | -0.1187 | 201.8 | YM03 |                |
| 31.883 | 104.727 | -0.1587 | 113.1 | YM08 |                |
| 31.845 | 104.746 | -0.1457 | 117.6 | YM09 |                |
| 31.772 | 104.736 | -0.0445 | 129.6 | YM11 |                |
| 31.769 | 104.732 | -0.0448 | 129.7 | YM12 |                |

| #       | # Part (2) |      |          |        |                |
|---------|------------|------|----------|--------|----------------|
| #       | Long.      | Lat. | Vertical | Marker |                |
| #       |            |      | (m)      |        |                |
| 103.878 | 31.698     |      | 0.0000   | MB01   | Starting point |
| 103.905 | 31.722     |      | -0.0027  | MB05   |                |
| 103.922 | 31.722     |      | 0.0046   | MB06   |                |
| 103.947 | 31.728     |      | 0.0008   | MB07   |                |
| 104.048 | 31.757     |      | 0.0316   | MB11   |                |
| 104.048 | 31.763     |      | 0.0793   | MB12   |                |
| 104.078 | 31.768     |      | 0.1017   | MB13   |                |

# Rupture of deep faults in the 2008 Wenchuan earthquake and uplift of the Longmen Shan

**Table S2 | Slip models for the 2008 Wenchuan earthquake ( $M_w$ 7.9)**

# Note:

# The slip model for the Wenchuan earthquake is inverted from a combined dataset (GPS, Levelling and InSAR )

# using the Bounded Variable Least-Squares. The upper limit on the slip components is set to 10 m for the BCF and 5 m for the PGF

#

#

**Model A: (with  $32 \text{ km}^2/\text{m}$  smoothing weight imposed). This is our preferred model on which our discussion is based in the main text.**

#

# Beichuan Fault

#

| Sub-Fault No | Upper-left corner |          |            | Upper-right corner |          |            | Lower-right corner |          |            | Lower-left corner |          |            | Slip Estimates |         |          | Uncertainty |         |          |
|--------------|-------------------|----------|------------|--------------------|----------|------------|--------------------|----------|------------|-------------------|----------|------------|----------------|---------|----------|-------------|---------|----------|
|              | Long. deg         | Lat. deg | Depth (km) | Long. deg          | Lat. deg | Depth (km) | Long. deg          | Lat. deg | Depth (km) | Long. deg         | Lat. deg | Depth (km) | Str. (m)       | Dip (m) | Amp. (m) | Str. (m)    | Dip (m) | Amp. (m) |
| 0001         | 105.840           | 32.900   | 0.0        | 105.807            | 32.877   | 0.0        | 105.799            | 32.883   | 2.8        | 105.832           | 32.906   | 2.8        | 0.00           | 0.00    | 0.00     | 0.00        | 0.00    | 0.00     |
| 0002         | 105.807           | 32.877   | 0.0        | 105.774            | 32.855   | 0.0        | 105.766            | 32.860   | 2.8        | 105.799           | 32.883   | 2.8        | 0.00           | 0.09    | 0.09     | 0.00        | 0.05    | 0.05     |
| 0003         | 105.774           | 32.855   | 0.0        | 105.741            | 32.832   | 0.0        | 105.733            | 32.838   | 2.8        | 105.766           | 32.860   | 2.8        | 0.00           | 0.27    | 0.27     | 0.00        | 0.07    | 0.07     |
| 0004         | 105.741           | 32.832   | 0.0        | 105.708            | 32.809   | 0.0        | 105.700            | 32.815   | 2.8        | 105.733           | 32.838   | 2.8        | 0.00           | 0.14    | 0.14     | 0.00        | 0.04    | 0.04     |
| 0005         | 105.708           | 32.809   | 0.0        | 105.675            | 32.786   | 0.0        | 105.666            | 32.792   | 2.8        | 105.700           | 32.815   | 2.8        | 0.00           | 0.06    | 0.06     | 0.00        | 0.04    | 0.04     |
| 0006         | 105.675           | 32.786   | 0.0        | 105.642            | 32.764   | 0.0        | 105.633            | 32.770   | 2.8        | 105.666           | 32.792   | 2.8        | 0.00           | 0.06    | 0.06     | 0.00        | 0.03    | 0.03     |
| 0007         | 105.642           | 32.764   | 0.0        | 105.609            | 32.741   | 0.0        | 105.600            | 32.747   | 2.8        | 105.633           | 32.770   | 2.8        | 0.19           | 0.00    | 0.19     | 0.11        | 0.00    | 0.11     |
| 0008         | 105.609           | 32.741   | 0.0        | 105.576            | 32.718   | 0.0        | 105.567            | 32.724   | 2.8        | 105.600           | 32.747   | 2.8        | 0.17           | 0.00    | 0.17     | 0.11        | 0.00    | 0.11     |
| 0009         | 105.576           | 32.718   | 0.0        | 105.543            | 32.696   | 0.0        | 105.534            | 32.702   | 2.8        | 105.567           | 32.724   | 2.8        | 0.00           | 0.61    | 0.61     | 0.00        | 0.11    | 0.11     |
| 0010         | 105.543           | 32.696   | 0.0        | 105.510            | 32.673   | 0.0        | 105.501            | 32.679   | 2.8        | 105.534           | 32.702   | 2.8        | 0.00           | 1.00    | 1.00     | 0.00        | 0.12    | 0.12     |
| 0011         | 105.510           | 32.673   | 0.0        | 105.477            | 32.651   | 0.0        | 105.469            | 32.656   | 2.8        | 105.501           | 32.679   | 2.8        | 0.00           | 0.20    | 0.20     | 0.00        | 0.03    | 0.03     |
| 0012         | 105.477           | 32.651   | 0.0        | 105.444            | 32.628   | 0.0        | 105.436            | 32.634   | 2.8        | 105.469           | 32.656   | 2.8        | 0.00           | 0.00    | 0.00     | 0.00        | 0.00    | 0.00     |
| 0013         | 105.444           | 32.628   | 0.0        | 105.411            | 32.605   | 0.0        | 105.403            | 32.611   | 2.8        | 105.436           | 32.634   | 2.8        | 0.91           | 0.00    | 0.91     | 0.14        | 0.00    | 0.14     |
| 0014         | 105.411           | 32.605   | 0.0        | 105.378            | 32.583   | 0.0        | 105.370            | 32.588   | 2.8        | 105.403           | 32.611   | 2.8        | 1.28           | 1.41    | 1.90     | 0.10        | 0.14    | 0.17     |
| 0015         | 105.378           | 32.583   | 0.0        | 105.345            | 32.560   | 0.0        | 105.337            | 32.566   | 2.8        | 105.370           | 32.588   | 2.8        | 1.20           | 1.68    | 2.07     | 0.08        | 0.19    | 0.21     |

|      |         |        |     |         |        |     |         |        |     |         |        |     |      |      |      |      |      |      |
|------|---------|--------|-----|---------|--------|-----|---------|--------|-----|---------|--------|-----|------|------|------|------|------|------|
| 0016 | 105.345 | 32.560 | 0.0 | 105.312 | 32.537 | 0.0 | 105.303 | 32.543 | 2.8 | 105.337 | 32.566 | 2.8 | 0.00 | 0.52 | 0.52 | 0.00 | 0.12 | 0.12 |
| 0017 | 105.312 | 32.537 | 0.0 | 105.279 | 32.514 | 0.0 | 105.270 | 32.520 | 2.8 | 105.303 | 32.543 | 2.8 | 0.00 | 0.00 | 0.00 | 0.00 | 0.02 | 0.02 |
| 0018 | 105.279 | 32.514 | 0.0 | 105.246 | 32.492 | 0.0 | 105.237 | 32.498 | 2.8 | 105.270 | 32.520 | 2.8 | 0.00 | 0.59 | 0.59 | 0.09 | 0.07 | 0.11 |
| 0019 | 105.246 | 32.492 | 0.0 | 105.213 | 32.469 | 0.0 | 105.204 | 32.475 | 2.8 | 105.237 | 32.498 | 2.8 | 1.39 | 0.25 | 1.41 | 0.13 | 0.09 | 0.16 |
| 0020 | 105.213 | 32.469 | 0.0 | 105.180 | 32.447 | 0.0 | 105.171 | 32.452 | 2.8 | 105.204 | 32.475 | 2.8 | 0.85 | 0.00 | 0.85 | 0.11 | 0.02 | 0.11 |
| 0021 | 105.180 | 32.447 | 0.0 | 105.147 | 32.424 | 0.0 | 105.138 | 32.430 | 2.8 | 105.171 | 32.452 | 2.8 | 1.30 | 0.00 | 1.30 | 0.07 | 0.00 | 0.07 |
| 0022 | 105.147 | 32.424 | 0.0 | 105.114 | 32.401 | 0.0 | 105.106 | 32.407 | 2.8 | 105.138 | 32.430 | 2.8 | 3.31 | 0.00 | 3.31 | 0.18 | 0.00 | 0.18 |
| 0023 | 105.114 | 32.401 | 0.0 | 105.081 | 32.379 | 0.0 | 105.073 | 32.384 | 2.8 | 105.106 | 32.407 | 2.8 | 2.14 | 1.26 | 2.49 | 0.09 | 0.06 | 0.11 |
| 0024 | 105.081 | 32.379 | 0.0 | 105.048 | 32.356 | 0.0 | 105.040 | 32.362 | 2.8 | 105.073 | 32.384 | 2.8 | 1.11 | 3.35 | 3.53 | 0.12 | 0.08 | 0.14 |
| 0025 | 105.048 | 32.356 | 0.0 | 105.015 | 32.333 | 0.0 | 105.007 | 32.339 | 2.8 | 105.040 | 32.362 | 2.8 | 3.80 | 0.79 | 3.88 | 0.15 | 0.05 | 0.16 |
| 0026 | 105.015 | 32.333 | 0.0 | 104.982 | 32.310 | 0.0 | 104.974 | 32.316 | 2.8 | 105.007 | 32.339 | 2.8 | 7.25 | 0.00 | 7.25 | 0.11 | 0.00 | 0.11 |
| 0027 | 104.982 | 32.310 | 0.0 | 104.949 | 32.288 | 0.0 | 104.941 | 32.294 | 2.8 | 104.974 | 32.316 | 2.8 | 9.25 | 0.00 | 9.25 | 0.00 | 0.00 | 0.00 |
| 0028 | 104.949 | 32.288 | 0.0 | 104.916 | 32.265 | 0.0 | 104.907 | 32.271 | 2.8 | 104.941 | 32.294 | 2.8 | 9.15 | 0.10 | 9.15 | 0.04 | 0.02 | 0.04 |
| 0029 | 104.916 | 32.265 | 0.0 | 104.883 | 32.242 | 0.0 | 104.874 | 32.248 | 2.8 | 104.907 | 32.271 | 2.8 | 7.82 | 3.00 | 8.38 | 0.11 | 0.08 | 0.14 |
| 0030 | 104.883 | 32.242 | 0.0 | 104.850 | 32.220 | 0.0 | 104.841 | 32.226 | 2.8 | 104.874 | 32.248 | 2.8 | 5.77 | 5.97 | 8.30 | 0.11 | 0.08 | 0.14 |
| 0031 | 104.850 | 32.220 | 0.0 | 104.823 | 32.195 | 0.0 | 104.815 | 32.202 | 2.8 | 104.843 | 32.227 | 2.8 | 2.75 | 4.76 | 5.50 | 0.08 | 0.10 | 0.13 |
| 0032 | 104.823 | 32.195 | 0.0 | 104.796 | 32.170 | 0.0 | 104.788 | 32.177 | 2.8 | 104.815 | 32.202 | 2.8 | 1.30 | 4.24 | 4.44 | 0.10 | 0.08 | 0.13 |
| 0033 | 104.796 | 32.170 | 0.0 | 104.768 | 32.145 | 0.0 | 104.761 | 32.152 | 2.8 | 104.788 | 32.177 | 2.8 | 4.65 | 4.66 | 6.58 | 0.10 | 0.08 | 0.13 |
| 0034 | 104.768 | 32.145 | 0.0 | 104.741 | 32.120 | 0.0 | 104.734 | 32.127 | 2.8 | 104.761 | 32.152 | 2.8 | 4.93 | 4.11 | 6.42 | 0.08 | 0.05 | 0.09 |
| 0035 | 104.741 | 32.120 | 0.0 | 104.714 | 32.095 | 0.0 | 104.706 | 32.102 | 2.8 | 104.734 | 32.127 | 2.8 | 3.60 | 4.91 | 6.09 | 0.06 | 0.09 | 0.11 |
| 0036 | 104.714 | 32.095 | 0.0 | 104.686 | 32.070 | 0.0 | 104.679 | 32.077 | 2.8 | 104.706 | 32.102 | 2.8 | 3.45 | 6.84 | 7.66 | 0.07 | 0.08 | 0.11 |
| 0037 | 104.686 | 32.070 | 0.0 | 104.659 | 32.045 | 0.0 | 104.652 | 32.052 | 2.8 | 104.679 | 32.077 | 2.8 | 4.11 | 7.17 | 8.27 | 0.08 | 0.08 | 0.11 |
| 0038 | 104.659 | 32.045 | 0.0 | 104.632 | 32.020 | 0.0 | 104.625 | 32.027 | 2.8 | 104.652 | 32.052 | 2.8 | 5.65 | 6.17 | 8.36 | 0.10 | 0.12 | 0.16 |
| 0039 | 104.632 | 32.020 | 0.0 | 104.605 | 31.995 | 0.0 | 104.597 | 32.002 | 2.8 | 104.625 | 32.027 | 2.8 | 8.35 | 4.93 | 9.70 | 0.11 | 0.10 | 0.15 |
| 0040 | 104.605 | 31.995 | 0.0 | 104.578 | 31.970 | 0.0 | 104.570 | 31.977 | 2.8 | 104.597 | 32.002 | 2.8 | 8.25 | 4.29 | 9.30 | 0.07 | 0.12 | 0.14 |
| 0041 | 104.578 | 31.970 | 0.0 | 104.550 | 31.945 | 0.0 | 104.543 | 31.952 | 2.8 | 104.570 | 31.977 | 2.8 | 7.09 | 5.70 | 9.10 | 0.11 | 0.11 | 0.16 |
| 0042 | 104.550 | 31.945 | 0.0 | 104.523 | 31.920 | 0.0 | 104.516 | 31.927 | 2.8 | 104.543 | 31.952 | 2.8 | 5.91 | 6.41 | 8.72 | 0.07 | 0.08 | 0.11 |
| 0043 | 105.833 | 32.907 | 2.8 | 105.800 | 32.884 | 2.8 | 105.788 | 32.892 | 5.5 | 105.822 | 32.915 | 5.5 | 1.00 | 1.00 | 1.41 | 0.03 | 0.00 | 0.03 |
| 0044 | 105.800 | 32.884 | 2.8 | 105.767 | 32.862 | 2.8 | 105.755 | 32.870 | 5.5 | 105.788 | 32.892 | 5.5 | 0.00 | 0.00 | 0.00 | 0.00 | 0.05 | 0.05 |
| 0045 | 105.767 | 32.862 | 2.8 | 105.734 | 32.839 | 2.8 | 105.722 | 32.847 | 5.5 | 105.755 | 32.870 | 5.5 | 0.00 | 0.01 | 0.01 | 0.00 | 0.04 | 0.04 |
| 0046 | 105.734 | 32.839 | 2.8 | 105.701 | 32.816 | 2.8 | 105.689 | 32.824 | 5.5 | 105.722 | 32.847 | 5.5 | 0.00 | 0.00 | 0.00 | 0.00 | 0.03 | 0.03 |
| 0047 | 105.701 | 32.816 | 2.8 | 105.668 | 32.794 | 2.8 | 105.656 | 32.802 | 5.5 | 105.689 | 32.824 | 5.5 | 0.00 | 0.00 | 0.00 | 0.00 | 0.01 | 0.01 |
| 0048 | 105.668 | 32.794 | 2.8 | 105.635 | 32.771 | 2.8 | 105.624 | 32.779 | 5.5 | 105.656 | 32.802 | 5.5 | 0.00 | 0.02 | 0.02 | 0.00 | 0.02 | 0.02 |
| 0049 | 105.635 | 32.771 | 2.8 | 105.602 | 32.748 | 2.8 | 105.591 | 32.756 | 5.5 | 105.624 | 32.779 | 5.5 | 0.00 | 0.01 | 0.01 | 0.00 | 0.08 | 0.08 |
| 0050 | 105.602 | 32.748 | 2.8 | 105.569 | 32.726 | 2.8 | 105.558 | 32.734 | 5.5 | 105.591 | 32.756 | 5.5 | 0.00 | 0.29 | 0.29 | 0.00 | 0.15 | 0.15 |
| 0051 | 105.569 | 32.726 | 2.8 | 105.536 | 32.703 | 2.8 | 105.525 | 32.711 | 5.5 | 105.558 | 32.734 | 5.5 | 0.00 | 1.14 | 1.14 | 0.00 | 0.15 | 0.15 |
| 0052 | 105.536 | 32.703 | 2.8 | 105.503 | 32.680 | 2.8 | 105.492 | 32.688 | 5.5 | 105.525 | 32.711 | 5.5 | 0.00 | 1.76 | 1.76 | 0.00 | 0.14 | 0.14 |
| 0053 | 105.503 | 32.680 | 2.8 | 105.470 | 32.658 | 2.8 | 105.459 | 32.666 | 5.5 | 105.492 | 32.688 | 5.5 | 0.79 | 0.69 | 1.05 | 0.04 | 0.07 | 0.08 |
| 0054 | 105.470 | 32.658 | 2.8 | 105.437 | 32.635 | 2.8 | 105.425 | 32.643 | 5.5 | 105.459 | 32.666 | 5.5 | 0.00 | 0.00 | 0.00 | 0.00 | 0.00 | 0.00 |

|      |         |        |     |         |        |     |         |        |     |         |        |     |      |      |      |      |      |      |
|------|---------|--------|-----|---------|--------|-----|---------|--------|-----|---------|--------|-----|------|------|------|------|------|------|
| 0055 | 105.437 | 32.635 | 2.8 | 105.404 | 32.612 | 2.8 | 105.392 | 32.620 | 5.5 | 105.425 | 32.643 | 5.5 | 0.00 | 0.00 | 0.00 | 0.00 | 0.00 | 0.00 |
| 0056 | 105.404 | 32.612 | 2.8 | 105.371 | 32.590 | 2.8 | 105.359 | 32.598 | 5.5 | 105.392 | 32.620 | 5.5 | 0.00 | 1.94 | 1.94 | 0.01 | 0.12 | 0.12 |
| 0057 | 105.371 | 32.590 | 2.8 | 105.338 | 32.567 | 2.8 | 105.326 | 32.575 | 5.5 | 105.359 | 32.598 | 5.5 | 0.78 | 1.88 | 2.04 | 0.09 | 0.12 | 0.15 |
| 0058 | 105.338 | 32.567 | 2.8 | 105.305 | 32.544 | 2.8 | 105.293 | 32.552 | 5.5 | 105.326 | 32.575 | 5.5 | 0.00 | 0.00 | 0.00 | 0.02 | 0.00 | 0.02 |
| 0059 | 105.305 | 32.544 | 2.8 | 105.272 | 32.522 | 2.8 | 105.260 | 32.530 | 5.5 | 105.293 | 32.552 | 5.5 | 0.00 | 0.00 | 0.00 | 0.00 | 0.00 | 0.00 |
| 0060 | 105.272 | 32.522 | 2.8 | 105.239 | 32.499 | 2.8 | 105.228 | 32.507 | 5.5 | 105.260 | 32.530 | 5.5 | 0.54 | 2.52 | 2.58 | 0.07 | 0.06 | 0.09 |
| 0061 | 105.239 | 32.499 | 2.8 | 105.206 | 32.476 | 2.8 | 105.195 | 32.484 | 5.5 | 105.228 | 32.507 | 5.5 | 2.82 | 3.03 | 4.14 | 0.09 | 0.11 | 0.14 |
| 0062 | 105.206 | 32.476 | 2.8 | 105.173 | 32.454 | 2.8 | 105.162 | 32.462 | 5.5 | 105.195 | 32.484 | 5.5 | 2.29 | 2.75 | 3.57 | 0.06 | 0.11 | 0.13 |
| 0063 | 105.173 | 32.454 | 2.8 | 105.140 | 32.431 | 2.8 | 105.129 | 32.439 | 5.5 | 105.162 | 32.462 | 5.5 | 2.69 | 2.21 | 3.48 | 0.09 | 0.11 | 0.14 |
| 0064 | 105.140 | 32.431 | 2.8 | 105.107 | 32.408 | 2.8 | 105.096 | 32.416 | 5.5 | 105.129 | 32.439 | 5.5 | 3.96 | 1.22 | 4.15 | 0.20 | 0.14 | 0.24 |
| 0065 | 105.107 | 32.408 | 2.8 | 105.074 | 32.386 | 2.8 | 105.062 | 32.394 | 5.5 | 105.096 | 32.416 | 5.5 | 2.20 | 1.18 | 2.50 | 0.08 | 0.17 | 0.19 |
| 0066 | 105.074 | 32.386 | 2.8 | 105.041 | 32.363 | 2.8 | 105.029 | 32.371 | 5.5 | 105.062 | 32.394 | 5.5 | 0.98 | 1.83 | 2.08 | 0.14 | 0.09 | 0.17 |
| 0067 | 105.041 | 32.363 | 2.8 | 105.008 | 32.340 | 2.8 | 104.996 | 32.348 | 5.5 | 105.029 | 32.371 | 5.5 | 3.30 | 0.03 | 3.30 | 0.20 | 0.05 | 0.21 |
| 0068 | 105.008 | 32.340 | 2.8 | 104.975 | 32.318 | 2.8 | 104.963 | 32.326 | 5.5 | 104.996 | 32.348 | 5.5 | 7.06 | 0.00 | 7.06 | 0.16 | 0.00 | 0.16 |
| 0069 | 104.975 | 32.318 | 2.8 | 104.942 | 32.295 | 2.8 | 104.930 | 32.303 | 5.5 | 104.963 | 32.326 | 5.5 | 9.12 | 0.00 | 9.12 | 0.05 | 0.00 | 0.05 |
| 0070 | 104.942 | 32.295 | 2.8 | 104.909 | 32.272 | 2.8 | 104.897 | 32.280 | 5.5 | 104.930 | 32.303 | 5.5 | 8.22 | 0.00 | 8.22 | 0.10 | 0.06 | 0.12 |
| 0071 | 104.909 | 32.272 | 2.8 | 104.876 | 32.250 | 2.8 | 104.865 | 32.258 | 5.5 | 104.897 | 32.280 | 5.5 | 5.94 | 3.07 | 6.69 | 0.11 | 0.12 | 0.16 |
| 0072 | 104.876 | 32.250 | 2.8 | 104.843 | 32.227 | 2.8 | 104.832 | 32.235 | 5.5 | 104.865 | 32.258 | 5.5 | 4.45 | 6.25 | 7.67 | 0.14 | 0.10 | 0.17 |
| 0073 | 104.842 | 32.226 | 2.8 | 104.815 | 32.201 | 2.8 | 104.805 | 32.210 | 5.5 | 104.832 | 32.235 | 5.5 | 3.47 | 4.18 | 5.43 | 0.19 | 0.07 | 0.20 |
| 0074 | 104.815 | 32.201 | 2.8 | 104.787 | 32.176 | 2.8 | 104.777 | 32.185 | 5.5 | 104.805 | 32.210 | 5.5 | 3.33 | 4.77 | 5.82 | 0.15 | 0.09 | 0.17 |
| 0075 | 104.787 | 32.176 | 2.8 | 104.760 | 32.151 | 2.8 | 104.750 | 32.160 | 5.5 | 104.777 | 32.185 | 5.5 | 4.81 | 2.36 | 5.36 | 0.09 | 0.16 | 0.18 |
| 0076 | 104.760 | 32.151 | 2.8 | 104.733 | 32.126 | 2.8 | 104.723 | 32.135 | 5.5 | 104.750 | 32.160 | 5.5 | 6.05 | 0.78 | 6.10 | 0.12 | 0.11 | 0.16 |
| 0077 | 104.733 | 32.126 | 2.8 | 104.706 | 32.101 | 2.8 | 104.696 | 32.110 | 5.5 | 104.723 | 32.135 | 5.5 | 2.33 | 0.00 | 2.33 | 0.09 | 0.00 | 0.09 |
| 0078 | 104.706 | 32.101 | 2.8 | 104.678 | 32.076 | 2.8 | 104.668 | 32.085 | 5.5 | 104.696 | 32.110 | 5.5 | 0.00 | 2.33 | 2.33 | 0.00 | 0.06 | 0.06 |
| 0079 | 104.678 | 32.076 | 2.8 | 104.651 | 32.051 | 2.8 | 104.641 | 32.060 | 5.5 | 104.668 | 32.085 | 5.5 | 0.38 | 3.87 | 3.89 | 0.08 | 0.12 | 0.14 |
| 0080 | 104.651 | 32.051 | 2.8 | 104.624 | 32.026 | 2.8 | 104.614 | 32.035 | 5.5 | 104.641 | 32.060 | 5.5 | 1.94 | 3.44 | 3.95 | 0.09 | 0.09 | 0.13 |
| 0081 | 104.624 | 32.026 | 2.8 | 104.597 | 32.001 | 2.8 | 104.587 | 32.010 | 5.5 | 104.614 | 32.035 | 5.5 | 3.71 | 2.28 | 4.36 | 0.10 | 0.09 | 0.13 |
| 0082 | 104.597 | 32.001 | 2.8 | 104.570 | 31.976 | 2.8 | 104.559 | 31.985 | 5.5 | 104.587 | 32.010 | 5.5 | 3.48 | 2.80 | 4.47 | 0.12 | 0.17 | 0.21 |
| 0083 | 104.570 | 31.976 | 2.8 | 104.542 | 31.951 | 2.8 | 104.532 | 31.960 | 5.5 | 104.559 | 31.985 | 5.5 | 3.28 | 5.55 | 6.45 | 0.15 | 0.12 | 0.19 |
| 0084 | 104.542 | 31.951 | 2.8 | 104.515 | 31.926 | 2.8 | 104.505 | 31.935 | 5.5 | 104.532 | 31.960 | 5.5 | 4.63 | 7.05 | 8.43 | 0.09 | 0.10 | 0.13 |
| 0085 | 105.824 | 32.917 | 5.5 | 105.791 | 32.894 | 5.5 | 105.778 | 32.903 | 8.1 | 105.811 | 32.925 | 8.1 | 0.77 | 1.00 | 1.26 | 0.11 | 0.00 | 0.11 |
| 0086 | 105.791 | 32.894 | 5.5 | 105.758 | 32.872 | 5.5 | 105.745 | 32.880 | 8.1 | 105.778 | 32.903 | 8.1 | 0.00 | 0.00 | 0.00 | 0.00 | 0.04 | 0.04 |
| 0087 | 105.758 | 32.872 | 5.5 | 105.725 | 32.849 | 5.5 | 105.712 | 32.857 | 8.1 | 105.745 | 32.880 | 8.1 | 0.00 | 0.00 | 0.00 | 0.00 | 0.02 | 0.02 |
| 0088 | 105.725 | 32.849 | 5.5 | 105.692 | 32.826 | 5.5 | 105.679 | 32.835 | 8.1 | 105.712 | 32.857 | 8.1 | 0.00 | 0.00 | 0.00 | 0.00 | 0.03 | 0.03 |
| 0089 | 105.692 | 32.826 | 5.5 | 105.659 | 32.803 | 5.5 | 105.646 | 32.812 | 8.1 | 105.679 | 32.835 | 8.1 | 0.00 | 0.00 | 0.00 | 0.00 | 0.03 | 0.03 |
| 0090 | 105.659 | 32.803 | 5.5 | 105.626 | 32.781 | 5.5 | 105.613 | 32.789 | 8.1 | 105.646 | 32.812 | 8.1 | 0.00 | 0.15 | 0.15 | 0.00 | 0.10 | 0.10 |
| 0091 | 105.626 | 32.781 | 5.5 | 105.593 | 32.758 | 5.5 | 105.580 | 32.767 | 8.1 | 105.613 | 32.789 | 8.1 | 0.00 | 0.36 | 0.36 | 0.00 | 0.25 | 0.25 |
| 0092 | 105.593 | 32.758 | 5.5 | 105.560 | 32.736 | 5.5 | 105.547 | 32.744 | 8.1 | 105.580 | 32.767 | 8.1 | 0.00 | 0.56 | 0.56 | 0.14 | 0.30 | 0.33 |
| 0093 | 105.560 | 32.736 | 5.5 | 105.527 | 32.713 | 5.5 | 105.514 | 32.721 | 8.1 | 105.547 | 32.744 | 8.1 | 1.10 | 0.59 | 1.24 | 0.18 | 0.18 | 0.25 |

|      |         |        |     |         |        |     |         |        |      |         |        |      |      |      |      |      |      |      |
|------|---------|--------|-----|---------|--------|-----|---------|--------|------|---------|--------|------|------|------|------|------|------|------|
| 0094 | 105.527 | 32.713 | 5.5 | 105.494 | 32.690 | 5.5 | 105.481 | 32.699 | 8.1  | 105.514 | 32.721 | 8.1  | 2.73 | 0.14 | 2.74 | 0.17 | 0.03 | 0.17 |
| 0095 | 105.494 | 32.690 | 5.5 | 105.461 | 32.667 | 5.5 | 105.448 | 32.676 | 8.1  | 105.481 | 32.699 | 8.1  | 2.93 | 0.00 | 2.93 | 0.14 | 0.00 | 0.14 |
| 0096 | 105.461 | 32.667 | 5.5 | 105.428 | 32.645 | 5.5 | 105.415 | 32.653 | 8.1  | 105.448 | 32.676 | 8.1  | 0.61 | 0.00 | 0.61 | 0.08 | 0.00 | 0.08 |
| 0097 | 105.428 | 32.645 | 5.5 | 105.395 | 32.622 | 5.5 | 105.382 | 32.631 | 8.1  | 105.415 | 32.653 | 8.1  | 0.00 | 0.00 | 0.00 | 0.00 | 0.00 | 0.00 |
| 0098 | 105.395 | 32.622 | 5.5 | 105.362 | 32.599 | 5.5 | 105.349 | 32.608 | 8.1  | 105.382 | 32.631 | 8.1  | 0.00 | 2.27 | 2.27 | 0.00 | 0.09 | 0.09 |
| 0099 | 105.362 | 32.599 | 5.5 | 105.329 | 32.577 | 5.5 | 105.316 | 32.585 | 8.1  | 105.349 | 32.608 | 8.1  | 1.31 | 2.22 | 2.58 | 0.10 | 0.08 | 0.13 |
| 0100 | 105.329 | 32.577 | 5.5 | 105.296 | 32.554 | 5.5 | 105.283 | 32.563 | 8.1  | 105.316 | 32.585 | 8.1  | 1.16 | 0.00 | 1.16 | 0.10 | 0.00 | 0.10 |
| 0101 | 105.296 | 32.554 | 5.5 | 105.263 | 32.532 | 5.5 | 105.250 | 32.540 | 8.1  | 105.283 | 32.563 | 8.1  | 0.23 | 0.12 | 0.26 | 0.11 | 0.06 | 0.13 |
| 0102 | 105.263 | 32.532 | 5.5 | 105.230 | 32.509 | 5.5 | 105.217 | 32.517 | 8.1  | 105.250 | 32.540 | 8.1  | 1.83 | 3.57 | 4.01 | 0.09 | 0.07 | 0.11 |
| 0103 | 105.230 | 32.509 | 5.5 | 105.197 | 32.486 | 5.5 | 105.184 | 32.495 | 8.1  | 105.217 | 32.517 | 8.1  | 4.40 | 5.47 | 7.02 | 0.10 | 0.10 | 0.14 |
| 0104 | 105.197 | 32.486 | 5.5 | 105.164 | 32.464 | 5.5 | 105.151 | 32.472 | 8.1  | 105.184 | 32.495 | 8.1  | 4.42 | 5.60 | 7.14 | 0.10 | 0.14 | 0.17 |
| 0105 | 105.164 | 32.464 | 5.5 | 105.131 | 32.441 | 5.5 | 105.118 | 32.449 | 8.1  | 105.151 | 32.472 | 8.1  | 4.31 | 4.64 | 6.34 | 0.13 | 0.17 | 0.21 |
| 0106 | 105.131 | 32.441 | 5.5 | 105.098 | 32.418 | 5.5 | 105.085 | 32.427 | 8.1  | 105.118 | 32.449 | 8.1  | 4.24 | 2.82 | 5.09 | 0.15 | 0.23 | 0.27 |
| 0107 | 105.098 | 32.418 | 5.5 | 105.065 | 32.395 | 5.5 | 105.052 | 32.404 | 8.1  | 105.085 | 32.427 | 8.1  | 2.49 | 1.58 | 2.94 | 0.10 | 0.22 | 0.24 |
| 0108 | 105.065 | 32.395 | 5.5 | 105.032 | 32.373 | 5.5 | 105.019 | 32.381 | 8.1  | 105.052 | 32.404 | 8.1  | 1.47 | 1.05 | 1.81 | 0.19 | 0.11 | 0.22 |
| 0109 | 105.032 | 32.373 | 5.5 | 104.999 | 32.350 | 5.5 | 104.986 | 32.359 | 8.1  | 105.019 | 32.381 | 8.1  | 3.38 | 0.10 | 3.38 | 0.24 | 0.03 | 0.24 |
| 0110 | 104.999 | 32.350 | 5.5 | 104.966 | 32.328 | 5.5 | 104.953 | 32.336 | 8.1  | 104.986 | 32.359 | 8.1  | 6.89 | 0.00 | 6.89 | 0.19 | 0.00 | 0.19 |
| 0111 | 104.966 | 32.328 | 5.5 | 104.933 | 32.305 | 5.5 | 104.920 | 32.313 | 8.1  | 104.953 | 32.336 | 8.1  | 8.88 | 0.00 | 8.88 | 0.12 | 0.00 | 0.12 |
| 0112 | 104.933 | 32.305 | 5.5 | 104.900 | 32.282 | 5.5 | 104.887 | 32.291 | 8.1  | 104.920 | 32.313 | 8.1  | 7.81 | 0.03 | 7.81 | 0.14 | 0.08 | 0.16 |
| 0113 | 104.900 | 32.282 | 5.5 | 104.867 | 32.259 | 5.5 | 104.854 | 32.268 | 8.1  | 104.887 | 32.291 | 8.1  | 5.50 | 1.55 | 5.71 | 0.16 | 0.12 | 0.20 |
| 0114 | 104.867 | 32.259 | 5.5 | 104.834 | 32.237 | 5.5 | 104.821 | 32.245 | 8.1  | 104.854 | 32.268 | 8.1  | 4.47 | 2.86 | 5.31 | 0.26 | 0.10 | 0.28 |
| 0115 | 104.834 | 32.237 | 5.5 | 104.804 | 32.210 | 5.5 | 104.793 | 32.220 | 8.1  | 104.821 | 32.245 | 8.1  | 4.71 | 1.60 | 4.98 | 0.32 | 0.06 | 0.33 |
| 0116 | 104.804 | 32.210 | 5.5 | 104.777 | 32.185 | 5.5 | 104.766 | 32.195 | 8.1  | 104.793 | 32.220 | 8.1  | 4.53 | 0.87 | 4.61 | 0.26 | 0.12 | 0.29 |
| 0117 | 104.777 | 32.185 | 5.5 | 104.749 | 32.160 | 5.5 | 104.739 | 32.170 | 8.1  | 104.766 | 32.195 | 8.1  | 5.79 | 0.78 | 5.85 | 0.19 | 0.19 | 0.27 |
| 0118 | 104.749 | 32.160 | 5.5 | 104.722 | 32.135 | 5.5 | 104.711 | 32.145 | 8.1  | 104.739 | 32.170 | 8.1  | 5.88 | 0.00 | 5.88 | 0.23 | 0.13 | 0.26 |
| 0119 | 104.722 | 32.135 | 5.5 | 104.695 | 32.110 | 5.5 | 104.684 | 32.120 | 8.1  | 104.711 | 32.145 | 8.1  | 2.11 | 0.00 | 2.11 | 0.16 | 0.00 | 0.16 |
| 0120 | 104.695 | 32.110 | 5.5 | 104.668 | 32.085 | 5.5 | 104.657 | 32.095 | 8.1  | 104.684 | 32.120 | 8.1  | 0.00 | 0.00 | 0.00 | 0.00 | 0.00 | 0.00 |
| 0121 | 104.668 | 32.085 | 5.5 | 104.640 | 32.060 | 5.5 | 104.630 | 32.070 | 8.1  | 104.657 | 32.095 | 8.1  | 0.00 | 0.57 | 0.57 | 0.00 | 0.11 | 0.11 |
| 0122 | 104.640 | 32.060 | 5.5 | 104.613 | 32.035 | 5.5 | 104.602 | 32.045 | 8.1  | 104.630 | 32.070 | 8.1  | 0.00 | 0.47 | 0.47 | 0.00 | 0.08 | 0.08 |
| 0123 | 104.613 | 32.035 | 5.5 | 104.586 | 32.010 | 5.5 | 104.575 | 32.020 | 8.1  | 104.602 | 32.045 | 8.1  | 0.00 | 0.19 | 0.19 | 0.09 | 0.06 | 0.11 |
| 0124 | 104.586 | 32.010 | 5.5 | 104.559 | 31.985 | 5.5 | 104.548 | 31.995 | 8.1  | 104.575 | 32.020 | 8.1  | 0.00 | 1.81 | 1.81 | 0.14 | 0.15 | 0.21 |
| 0125 | 104.559 | 31.985 | 5.5 | 104.531 | 31.960 | 5.5 | 104.521 | 31.970 | 8.1  | 104.548 | 31.995 | 8.1  | 0.00 | 4.77 | 4.77 | 0.14 | 0.12 | 0.18 |
| 0126 | 104.531 | 31.960 | 5.5 | 104.504 | 31.935 | 5.5 | 104.493 | 31.945 | 8.1  | 104.521 | 31.970 | 8.1  | 1.73 | 5.70 | 5.96 | 0.06 | 0.10 | 0.12 |
| 0127 | 105.814 | 32.927 | 8.1 | 105.781 | 32.905 | 8.1 | 105.764 | 32.916 | 10.3 | 105.797 | 32.939 | 10.3 | 0.00 | 1.00 | 1.00 | 0.05 | 0.00 | 0.05 |
| 0128 | 105.781 | 32.905 | 8.1 | 105.748 | 32.882 | 8.1 | 105.731 | 32.894 | 10.3 | 105.764 | 32.916 | 10.3 | 0.00 | 0.00 | 0.00 | 0.11 | 0.04 | 0.12 |
| 0129 | 105.748 | 32.882 | 8.1 | 105.715 | 32.859 | 8.1 | 105.698 | 32.871 | 10.3 | 105.731 | 32.894 | 10.3 | 0.00 | 0.00 | 0.00 | 0.11 | 0.00 | 0.11 |
| 0130 | 105.715 | 32.859 | 8.1 | 105.682 | 32.837 | 8.1 | 105.665 | 32.848 | 10.3 | 105.698 | 32.871 | 10.3 | 0.00 | 0.00 | 0.00 | 0.16 | 0.02 | 0.16 |
| 0131 | 105.682 | 32.837 | 8.1 | 105.649 | 32.814 | 8.1 | 105.632 | 32.825 | 10.3 | 105.665 | 32.848 | 10.3 | 0.00 | 0.01 | 0.01 | 0.20 | 0.05 | 0.21 |
| 0132 | 105.649 | 32.814 | 8.1 | 105.616 | 32.791 | 8.1 | 105.599 | 32.803 | 10.3 | 105.632 | 32.825 | 10.3 | 0.00 | 0.31 | 0.31 | 0.20 | 0.14 | 0.24 |



|      |         |        |      |         |        |      |         |        |      |         |        |      |      |      |      |      |      |      |
|------|---------|--------|------|---------|--------|------|---------|--------|------|---------|--------|------|------|------|------|------|------|------|
| 0133 | 105.616 | 32.791 | 8.1  | 105.583 | 32.769 | 8.1  | 105.566 | 32.780 | 10.3 | 105.599 | 32.803 | 10.3 | 0.00 | 0.74 | 0.74 | 0.18 | 0.28 | 0.33 |
| 0134 | 105.583 | 32.769 | 8.1  | 105.550 | 32.746 | 8.1  | 105.533 | 32.758 | 10.3 | 105.566 | 32.780 | 10.3 | 0.00 | 0.94 | 0.94 | 0.21 | 0.29 | 0.36 |
| 0135 | 105.550 | 32.746 | 8.1  | 105.517 | 32.723 | 8.1  | 105.500 | 32.735 | 10.3 | 105.533 | 32.758 | 10.3 | 1.72 | 0.62 | 1.83 | 0.20 | 0.16 | 0.26 |
| 0136 | 105.517 | 32.723 | 8.1  | 105.484 | 32.701 | 8.1  | 105.467 | 32.712 | 10.3 | 105.500 | 32.735 | 10.3 | 3.72 | 0.00 | 3.72 | 0.18 | 0.00 | 0.18 |
| 0137 | 105.484 | 32.701 | 8.1  | 105.451 | 32.678 | 8.1  | 105.434 | 32.689 | 10.3 | 105.467 | 32.712 | 10.3 | 3.84 | 0.00 | 3.84 | 0.13 | 0.00 | 0.13 |
| 0138 | 105.451 | 32.678 | 8.1  | 105.418 | 32.655 | 8.1  | 105.401 | 32.667 | 10.3 | 105.434 | 32.689 | 10.3 | 1.85 | 0.00 | 1.85 | 0.10 | 0.00 | 0.10 |
| 0139 | 105.418 | 32.655 | 8.1  | 105.385 | 32.633 | 8.1  | 105.368 | 32.644 | 10.3 | 105.401 | 32.667 | 10.3 | 0.66 | 0.00 | 0.66 | 0.09 | 0.00 | 0.09 |
| 0140 | 105.385 | 32.633 | 8.1  | 105.352 | 32.610 | 8.1  | 105.335 | 32.621 | 10.3 | 105.368 | 32.644 | 10.3 | 0.89 | 1.53 | 1.77 | 0.08 | 0.11 | 0.14 |
| 0141 | 105.352 | 32.610 | 8.1  | 105.319 | 32.587 | 8.1  | 105.302 | 32.599 | 10.3 | 105.335 | 32.621 | 10.3 | 2.59 | 1.58 | 3.03 | 0.09 | 0.08 | 0.12 |
| 0142 | 105.319 | 32.587 | 8.1  | 105.286 | 32.565 | 8.1  | 105.269 | 32.576 | 10.3 | 105.302 | 32.599 | 10.3 | 3.19 | 0.00 | 3.19 | 0.08 | 0.00 | 0.08 |
| 0143 | 105.286 | 32.565 | 8.1  | 105.253 | 32.542 | 8.1  | 105.236 | 32.553 | 10.3 | 105.269 | 32.576 | 10.3 | 2.49 | 0.00 | 2.49 | 0.08 | 0.00 | 0.08 |
| 0144 | 105.253 | 32.542 | 8.1  | 105.220 | 32.519 | 8.1  | 105.203 | 32.531 | 10.3 | 105.236 | 32.553 | 10.3 | 3.33 | 2.27 | 4.03 | 0.08 | 0.05 | 0.09 |
| 0145 | 105.220 | 32.519 | 8.1  | 105.187 | 32.497 | 8.1  | 105.170 | 32.508 | 10.3 | 105.203 | 32.531 | 10.3 | 4.84 | 4.12 | 6.35 | 0.10 | 0.10 | 0.14 |
| 0146 | 105.187 | 32.497 | 8.1  | 105.154 | 32.474 | 8.1  | 105.137 | 32.485 | 10.3 | 105.170 | 32.508 | 10.3 | 4.98 | 4.35 | 6.61 | 0.11 | 0.15 | 0.19 |
| 0147 | 105.154 | 32.474 | 8.1  | 105.121 | 32.451 | 8.1  | 105.104 | 32.463 | 10.3 | 105.137 | 32.485 | 10.3 | 4.68 | 3.34 | 5.75 | 0.10 | 0.21 | 0.23 |
| 0148 | 105.121 | 32.451 | 8.1  | 105.088 | 32.429 | 8.1  | 105.071 | 32.440 | 10.3 | 105.104 | 32.463 | 10.3 | 4.22 | 1.76 | 4.57 | 0.09 | 0.22 | 0.24 |
| 0149 | 105.088 | 32.429 | 8.1  | 105.055 | 32.406 | 8.1  | 105.038 | 32.417 | 10.3 | 105.071 | 32.440 | 10.3 | 3.14 | 0.68 | 3.21 | 0.08 | 0.14 | 0.16 |
| 0150 | 105.055 | 32.406 | 8.1  | 105.022 | 32.383 | 8.1  | 105.005 | 32.395 | 10.3 | 105.038 | 32.417 | 10.3 | 1.61 | 0.20 | 1.62 | 0.14 | 0.03 | 0.14 |
| 0151 | 105.022 | 32.383 | 8.1  | 104.989 | 32.361 | 8.1  | 104.972 | 32.372 | 10.3 | 105.005 | 32.395 | 10.3 | 3.81 | 0.00 | 3.81 | 0.16 | 0.00 | 0.16 |
| 0152 | 104.989 | 32.361 | 8.1  | 104.956 | 32.338 | 8.1  | 104.939 | 32.349 | 10.3 | 104.972 | 32.372 | 10.3 | 6.10 | 0.00 | 6.10 | 0.16 | 0.00 | 0.16 |
| 0153 | 104.956 | 32.338 | 8.1  | 104.922 | 32.315 | 8.1  | 104.906 | 32.327 | 10.3 | 104.939 | 32.349 | 10.3 | 7.61 | 0.00 | 7.61 | 0.15 | 0.00 | 0.15 |
| 0154 | 104.922 | 32.315 | 8.1  | 104.889 | 32.293 | 8.1  | 104.873 | 32.304 | 10.3 | 104.906 | 32.327 | 10.3 | 7.00 | 0.00 | 7.00 | 0.13 | 0.00 | 0.13 |
| 0155 | 104.889 | 32.293 | 8.1  | 104.856 | 32.270 | 8.1  | 104.840 | 32.281 | 10.3 | 104.873 | 32.304 | 10.3 | 5.53 | 0.00 | 5.53 | 0.11 | 0.00 | 0.11 |
| 0156 | 104.856 | 32.270 | 8.1  | 104.823 | 32.247 | 8.1  | 104.807 | 32.259 | 10.3 | 104.840 | 32.281 | 10.3 | 4.82 | 0.00 | 4.82 | 0.20 | 0.00 | 0.20 |
| 0157 | 104.820 | 32.244 | 8.1  | 104.792 | 32.219 | 8.1  | 104.778 | 32.232 | 10.3 | 104.805 | 32.257 | 10.3 | 5.03 | 0.00 | 5.03 | 0.24 | 0.00 | 0.24 |
| 0158 | 104.792 | 32.219 | 8.1  | 104.765 | 32.194 | 8.1  | 104.751 | 32.207 | 10.3 | 104.778 | 32.232 | 10.3 | 4.95 | 0.00 | 4.95 | 0.19 | 0.00 | 0.19 |
| 0159 | 104.765 | 32.194 | 8.1  | 104.738 | 32.169 | 8.1  | 104.723 | 32.182 | 10.3 | 104.751 | 32.207 | 10.3 | 5.43 | 0.00 | 5.43 | 0.15 | 0.05 | 0.16 |
| 0160 | 104.738 | 32.169 | 8.1  | 104.710 | 32.144 | 8.1  | 104.696 | 32.157 | 10.3 | 104.723 | 32.182 | 10.3 | 5.28 | 0.00 | 5.28 | 0.20 | 0.00 | 0.20 |
| 0161 | 104.710 | 32.144 | 8.1  | 104.683 | 32.119 | 8.1  | 104.669 | 32.132 | 10.3 | 104.696 | 32.157 | 10.3 | 3.12 | 0.00 | 3.12 | 0.13 | 0.00 | 0.13 |
| 0162 | 104.683 | 32.119 | 8.1  | 104.656 | 32.094 | 8.1  | 104.641 | 32.107 | 10.3 | 104.669 | 32.132 | 10.3 | 1.13 | 0.00 | 1.13 | 0.00 | 0.00 | 0.00 |
| 0163 | 104.656 | 32.094 | 8.1  | 104.629 | 32.069 | 8.1  | 104.614 | 32.082 | 10.3 | 104.641 | 32.107 | 10.3 | 0.28 | 0.00 | 0.28 | 0.00 | 0.00 | 0.00 |
| 0164 | 104.629 | 32.069 | 8.1  | 104.602 | 32.044 | 8.1  | 104.587 | 32.057 | 10.3 | 104.614 | 32.082 | 10.3 | 0.00 | 0.00 | 0.00 | 0.00 | 0.00 | 0.00 |
| 0165 | 104.602 | 32.044 | 8.1  | 104.574 | 32.019 | 8.1  | 104.560 | 32.032 | 10.3 | 104.587 | 32.057 | 10.3 | 0.00 | 0.00 | 0.00 | 0.00 | 0.00 | 0.00 |
| 0166 | 104.574 | 32.019 | 8.1  | 104.547 | 31.994 | 8.1  | 104.532 | 32.007 | 10.3 | 104.560 | 32.032 | 10.3 | 0.00 | 1.27 | 1.27 | 0.00 | 0.13 | 0.13 |
| 0167 | 104.547 | 31.994 | 8.1  | 104.520 | 31.969 | 8.1  | 104.505 | 31.982 | 10.3 | 104.532 | 32.007 | 10.3 | 0.00 | 3.40 | 3.40 | 0.00 | 0.15 | 0.15 |
| 0168 | 104.520 | 31.969 | 8.1  | 104.493 | 31.944 | 8.1  | 104.478 | 31.957 | 10.3 | 104.505 | 31.982 | 10.3 | 1.18 | 3.72 | 3.90 | 0.00 | 0.16 | 0.16 |
| 0169 | 105.800 | 32.941 | 10.3 | 105.767 | 32.919 | 10.3 | 105.748 | 32.932 | 12.2 | 105.781 | 32.955 | 12.2 | 0.52 | 0.77 | 0.92 | 0.00 | 0.15 | 0.15 |
| 0170 | 105.767 | 32.919 | 10.3 | 105.734 | 32.896 | 10.3 | 105.715 | 32.909 | 12.2 | 105.748 | 32.932 | 12.2 | 0.22 | 0.00 | 0.22 | 0.00 | 0.03 | 0.03 |
| 0171 | 105.734 | 32.896 | 10.3 | 105.701 | 32.873 | 10.3 | 105.682 | 32.887 | 12.2 | 105.715 | 32.909 | 12.2 | 0.25 | 0.00 | 0.25 | 0.00 | 0.00 | 0.00 |

|      |         |        |      |         |        |      |         |        |      |         |        |      |      |      |      |      |      |      |
|------|---------|--------|------|---------|--------|------|---------|--------|------|---------|--------|------|------|------|------|------|------|------|
| 0172 | 105.701 | 32.873 | 10.3 | 105.668 | 32.851 | 10.3 | 105.649 | 32.864 | 12.2 | 105.682 | 32.887 | 12.2 | 0.36 | 0.00 | 0.36 | 0.00 | 0.01 | 0.01 |
| 0173 | 105.668 | 32.851 | 10.3 | 105.635 | 32.828 | 10.3 | 105.616 | 32.841 | 12.2 | 105.649 | 32.864 | 12.2 | 0.39 | 0.00 | 0.39 | 0.00 | 0.06 | 0.06 |
| 0174 | 105.635 | 32.828 | 10.3 | 105.602 | 32.805 | 10.3 | 105.583 | 32.819 | 12.2 | 105.616 | 32.841 | 12.2 | 0.00 | 0.31 | 0.31 | 0.00 | 0.16 | 0.16 |
| 0175 | 105.602 | 32.805 | 10.3 | 105.569 | 32.783 | 10.3 | 105.550 | 32.796 | 12.2 | 105.583 | 32.819 | 12.2 | 0.00 | 0.74 | 0.74 | 0.00 | 0.23 | 0.23 |
| 0176 | 105.569 | 32.783 | 10.3 | 105.536 | 32.760 | 10.3 | 105.517 | 32.773 | 12.2 | 105.550 | 32.796 | 12.2 | 0.00 | 0.87 | 0.87 | 0.00 | 0.21 | 0.21 |
| 0177 | 105.536 | 32.760 | 10.3 | 105.503 | 32.737 | 10.3 | 105.484 | 32.751 | 12.2 | 105.517 | 32.773 | 12.2 | 1.28 | 0.46 | 1.37 | 0.00 | 0.11 | 0.11 |
| 0178 | 105.503 | 32.737 | 10.3 | 105.470 | 32.715 | 10.3 | 105.451 | 32.728 | 12.2 | 105.484 | 32.751 | 12.2 | 0.00 | 0.00 | 0.00 | 0.02 | 0.00 | 0.02 |
| 0179 | 105.470 | 32.715 | 10.3 | 105.437 | 32.692 | 10.3 | 105.418 | 32.705 | 12.2 | 105.451 | 32.728 | 12.2 | 0.00 | 0.00 | 0.00 | 0.00 | 0.00 | 0.00 |
| 0180 | 105.437 | 32.692 | 10.3 | 105.404 | 32.669 | 10.3 | 105.385 | 32.682 | 12.2 | 105.418 | 32.705 | 12.2 | 0.00 | 0.00 | 0.00 | 0.00 | 0.00 | 0.00 |
| 0181 | 105.404 | 32.669 | 10.3 | 105.371 | 32.647 | 10.3 | 105.352 | 32.660 | 12.2 | 105.385 | 32.682 | 12.2 | 0.00 | 0.00 | 0.00 | 0.00 | 0.00 | 0.00 |
| 0182 | 105.371 | 32.647 | 10.3 | 105.338 | 32.624 | 10.3 | 105.319 | 32.637 | 12.2 | 105.352 | 32.660 | 12.2 | 0.00 | 0.60 | 0.60 | 0.00 | 0.10 | 0.10 |
| 0183 | 105.338 | 32.624 | 10.3 | 105.305 | 32.601 | 10.3 | 105.286 | 32.614 | 12.2 | 105.319 | 32.637 | 12.2 | 0.00 | 0.69 | 0.69 | 0.00 | 0.10 | 0.10 |
| 0184 | 105.305 | 32.601 | 10.3 | 105.272 | 32.579 | 10.3 | 105.253 | 32.592 | 12.2 | 105.286 | 32.614 | 12.2 | 0.00 | 0.00 | 0.00 | 0.00 | 0.00 | 0.00 |
| 0185 | 105.272 | 32.579 | 10.3 | 105.239 | 32.556 | 10.3 | 105.220 | 32.569 | 12.2 | 105.253 | 32.592 | 12.2 | 0.00 | 0.00 | 0.00 | 0.00 | 0.00 | 0.00 |
| 0186 | 105.239 | 32.556 | 10.3 | 105.206 | 32.533 | 10.3 | 105.187 | 32.546 | 12.2 | 105.220 | 32.569 | 12.2 | 0.00 | 0.58 | 0.58 | 0.00 | 0.07 | 0.07 |
| 0187 | 105.206 | 32.533 | 10.3 | 105.173 | 32.511 | 10.3 | 105.154 | 32.524 | 12.2 | 105.187 | 32.546 | 12.2 | 0.00 | 1.46 | 1.46 | 0.00 | 0.12 | 0.12 |
| 0188 | 105.173 | 32.511 | 10.3 | 105.140 | 32.488 | 10.3 | 105.121 | 32.501 | 12.2 | 105.154 | 32.524 | 12.2 | 0.00 | 1.56 | 1.56 | 0.00 | 0.14 | 0.14 |
| 0189 | 105.140 | 32.488 | 10.3 | 105.107 | 32.465 | 10.3 | 105.088 | 32.478 | 12.2 | 105.121 | 32.501 | 12.2 | 0.00 | 0.97 | 0.97 | 0.00 | 0.15 | 0.15 |
| 0190 | 105.107 | 32.465 | 10.3 | 105.074 | 32.443 | 10.3 | 105.055 | 32.456 | 12.2 | 105.088 | 32.478 | 12.2 | 0.00 | 0.25 | 0.25 | 0.00 | 0.12 | 0.12 |
| 0191 | 105.074 | 32.443 | 10.3 | 105.041 | 32.420 | 10.3 | 105.022 | 32.433 | 12.2 | 105.055 | 32.456 | 12.2 | 0.00 | 0.00 | 0.00 | 0.00 | 0.00 | 0.00 |
| 0192 | 105.041 | 32.420 | 10.3 | 105.008 | 32.397 | 10.3 | 104.989 | 32.410 | 12.2 | 105.022 | 32.433 | 12.2 | 0.00 | 0.00 | 0.00 | 0.00 | 0.00 | 0.00 |
| 0193 | 105.008 | 32.397 | 10.3 | 104.975 | 32.375 | 10.3 | 104.956 | 32.388 | 12.2 | 104.989 | 32.410 | 12.2 | 0.00 | 0.00 | 0.00 | 0.00 | 0.00 | 0.00 |
| 0194 | 104.975 | 32.375 | 10.3 | 104.942 | 32.352 | 10.3 | 104.923 | 32.365 | 12.2 | 104.956 | 32.388 | 12.2 | 0.00 | 0.00 | 0.00 | 0.07 | 0.00 | 0.07 |
| 0195 | 104.942 | 32.352 | 10.3 | 104.909 | 32.329 | 10.3 | 104.890 | 32.342 | 12.2 | 104.923 | 32.365 | 12.2 | 0.41 | 0.00 | 0.41 | 0.10 | 0.00 | 0.10 |
| 0196 | 104.909 | 32.329 | 10.3 | 104.876 | 32.306 | 10.3 | 104.857 | 32.319 | 12.2 | 104.890 | 32.342 | 12.2 | 0.21 | 0.00 | 0.21 | 0.08 | 0.00 | 0.08 |
| 0197 | 104.876 | 32.306 | 10.3 | 104.843 | 32.284 | 10.3 | 104.824 | 32.297 | 12.2 | 104.857 | 32.319 | 12.2 | 0.00 | 0.00 | 0.00 | 0.00 | 0.00 | 0.00 |
| 0198 | 104.843 | 32.284 | 10.3 | 104.810 | 32.261 | 10.3 | 104.791 | 32.274 | 12.2 | 104.824 | 32.297 | 12.2 | 0.00 | 0.00 | 0.00 | 0.00 | 0.00 | 0.00 |
| 0199 | 104.804 | 32.256 | 10.3 | 104.777 | 32.231 | 10.3 | 104.760 | 32.246 | 12.2 | 104.787 | 32.272 | 12.2 | 0.00 | 0.00 | 0.00 | 0.00 | 0.00 | 0.00 |
| 0200 | 104.777 | 32.231 | 10.3 | 104.749 | 32.206 | 10.3 | 104.733 | 32.221 | 12.2 | 104.760 | 32.246 | 12.2 | 0.00 | 0.00 | 0.00 | 0.00 | 0.00 | 0.00 |
| 0201 | 104.749 | 32.206 | 10.3 | 104.722 | 32.181 | 10.3 | 104.706 | 32.197 | 12.2 | 104.733 | 32.221 | 12.2 | 0.00 | 0.00 | 0.00 | 0.00 | 0.00 | 0.00 |
| 0202 | 104.722 | 32.181 | 10.3 | 104.695 | 32.156 | 10.3 | 104.678 | 32.172 | 12.2 | 104.706 | 32.197 | 12.2 | 0.00 | 0.00 | 0.00 | 0.07 | 0.00 | 0.07 |
| 0203 | 104.695 | 32.156 | 10.3 | 104.668 | 32.131 | 10.3 | 104.651 | 32.146 | 12.2 | 104.678 | 32.172 | 12.2 | 0.00 | 0.00 | 0.00 | 0.00 | 0.00 | 0.00 |
| 0204 | 104.668 | 32.131 | 10.3 | 104.640 | 32.106 | 10.3 | 104.624 | 32.121 | 12.2 | 104.651 | 32.146 | 12.2 | 0.00 | 0.00 | 0.00 | 0.04 | 0.00 | 0.04 |
| 0205 | 104.640 | 32.106 | 10.3 | 104.613 | 32.081 | 10.3 | 104.597 | 32.096 | 12.2 | 104.624 | 32.121 | 12.2 | 0.00 | 0.00 | 0.00 | 0.00 | 0.00 | 0.00 |
| 0206 | 104.613 | 32.081 | 10.3 | 104.586 | 32.056 | 10.3 | 104.569 | 32.071 | 12.2 | 104.597 | 32.096 | 12.2 | 0.00 | 0.00 | 0.00 | 0.00 | 0.00 | 0.00 |
| 0207 | 104.586 | 32.056 | 10.3 | 104.559 | 32.031 | 10.3 | 104.542 | 32.046 | 12.2 | 104.569 | 32.071 | 12.2 | 0.00 | 0.00 | 0.00 | 0.00 | 0.00 | 0.00 |
| 0208 | 104.559 | 32.031 | 10.3 | 104.531 | 32.006 | 10.3 | 104.515 | 32.021 | 12.2 | 104.542 | 32.046 | 12.2 | 0.00 | 0.67 | 0.67 | 0.00 | 0.13 | 0.13 |
| 0209 | 104.531 | 32.006 | 10.3 | 104.504 | 31.981 | 10.3 | 104.488 | 31.996 | 12.2 | 104.515 | 32.021 | 12.2 | 0.00 | 1.86 | 1.86 | 0.00 | 0.17 | 0.17 |
| 0210 | 104.504 | 31.981 | 10.3 | 104.477 | 31.956 | 10.3 | 104.460 | 31.971 | 12.2 | 104.488 | 31.996 | 12.2 | 0.00 | 1.82 | 1.82 | 0.10 | 0.18 | 0.21 |

|      |         |        |      |         |        |      |         |        |      |         |        |      |      |      |      |      |      |      |
|------|---------|--------|------|---------|--------|------|---------|--------|------|---------|--------|------|------|------|------|------|------|------|
| 0211 | 105.785 | 32.958 | 12.2 | 105.752 | 32.935 | 12.2 | 105.730 | 32.950 | 13.7 | 105.763 | 32.972 | 13.7 | 0.00 | 0.18 | 0.18 | 0.13 | 0.20 | 0.24 |
| 0212 | 105.752 | 32.935 | 12.2 | 105.719 | 32.912 | 12.2 | 105.697 | 32.927 | 13.7 | 105.730 | 32.950 | 13.7 | 0.00 | 0.00 | 0.00 | 0.00 | 0.02 | 0.02 |
| 0213 | 105.719 | 32.912 | 12.2 | 105.686 | 32.890 | 12.2 | 105.664 | 32.904 | 13.7 | 105.697 | 32.927 | 13.7 | 0.00 | 0.00 | 0.00 | 0.00 | 0.00 | 0.00 |
| 0214 | 105.686 | 32.890 | 12.2 | 105.653 | 32.867 | 12.2 | 105.631 | 32.882 | 13.7 | 105.664 | 32.904 | 13.7 | 0.00 | 0.00 | 0.00 | 0.00 | 0.01 | 0.01 |
| 0215 | 105.653 | 32.867 | 12.2 | 105.620 | 32.844 | 12.2 | 105.598 | 32.859 | 13.7 | 105.631 | 32.882 | 13.7 | 0.00 | 0.00 | 0.00 | 0.00 | 0.04 | 0.04 |
| 0216 | 105.620 | 32.844 | 12.2 | 105.587 | 32.822 | 12.2 | 105.565 | 32.836 | 13.7 | 105.598 | 32.859 | 13.7 | 0.36 | 0.15 | 0.39 | 0.00 | 0.14 | 0.14 |
| 0217 | 105.587 | 32.822 | 12.2 | 105.554 | 32.799 | 12.2 | 105.532 | 32.814 | 13.7 | 105.565 | 32.836 | 13.7 | 0.00 | 0.42 | 0.42 | 0.00 | 0.21 | 0.21 |
| 0218 | 105.554 | 32.799 | 12.2 | 105.521 | 32.776 | 12.2 | 105.499 | 32.791 | 13.7 | 105.532 | 32.814 | 13.7 | 0.00 | 0.46 | 0.46 | 0.00 | 0.19 | 0.19 |
| 0219 | 105.521 | 32.776 | 12.2 | 105.488 | 32.754 | 12.2 | 105.466 | 32.768 | 13.7 | 105.499 | 32.791 | 13.7 | 1.40 | 0.17 | 1.41 | 0.00 | 0.10 | 0.10 |
| 0220 | 105.488 | 32.754 | 12.2 | 105.455 | 32.731 | 12.2 | 105.433 | 32.746 | 13.7 | 105.466 | 32.768 | 13.7 | 0.00 | 0.00 | 0.00 | 0.00 | 0.00 | 0.00 |
| 0221 | 105.455 | 32.731 | 12.2 | 105.422 | 32.708 | 12.2 | 105.400 | 32.723 | 13.7 | 105.433 | 32.746 | 13.7 | 0.00 | 0.00 | 0.00 | 0.00 | 0.00 | 0.00 |
| 0222 | 105.422 | 32.708 | 12.2 | 105.389 | 32.685 | 12.2 | 105.367 | 32.700 | 13.7 | 105.400 | 32.723 | 13.7 | 0.00 | 0.00 | 0.00 | 0.00 | 0.00 | 0.00 |
| 0223 | 105.389 | 32.685 | 12.2 | 105.356 | 32.663 | 12.2 | 105.334 | 32.678 | 13.7 | 105.367 | 32.700 | 13.7 | 0.00 | 0.00 | 0.00 | 0.00 | 0.00 | 0.00 |
| 0224 | 105.356 | 32.663 | 12.2 | 105.323 | 32.640 | 12.2 | 105.301 | 32.655 | 13.7 | 105.334 | 32.678 | 13.7 | 0.00 | 0.00 | 0.00 | 0.00 | 0.01 | 0.01 |
| 0225 | 105.323 | 32.640 | 12.2 | 105.290 | 32.617 | 12.2 | 105.268 | 32.632 | 13.7 | 105.301 | 32.655 | 13.7 | 0.00 | 0.03 | 0.03 | 0.00 | 0.04 | 0.04 |
| 0226 | 105.290 | 32.617 | 12.2 | 105.257 | 32.595 | 12.2 | 105.235 | 32.609 | 13.7 | 105.268 | 32.632 | 13.7 | 0.00 | 0.00 | 0.00 | 0.00 | 0.00 | 0.00 |
| 0227 | 105.257 | 32.595 | 12.2 | 105.224 | 32.572 | 12.2 | 105.202 | 32.587 | 13.7 | 105.235 | 32.609 | 13.7 | 0.00 | 0.00 | 0.00 | 0.00 | 0.00 | 0.00 |
| 0228 | 105.224 | 32.572 | 12.2 | 105.191 | 32.549 | 12.2 | 105.169 | 32.564 | 13.7 | 105.202 | 32.587 | 13.7 | 0.00 | 0.00 | 0.00 | 0.00 | 0.00 | 0.00 |
| 0229 | 105.191 | 32.549 | 12.2 | 105.158 | 32.527 | 12.2 | 105.136 | 32.541 | 13.7 | 105.169 | 32.564 | 13.7 | 0.00 | 0.00 | 0.00 | 0.00 | 0.04 | 0.04 |
| 0230 | 105.158 | 32.527 | 12.2 | 105.125 | 32.504 | 12.2 | 105.103 | 32.519 | 13.7 | 105.136 | 32.541 | 13.7 | 0.00 | 0.00 | 0.00 | 0.00 | 0.02 | 0.02 |
| 0231 | 105.125 | 32.504 | 12.2 | 105.092 | 32.481 | 12.2 | 105.070 | 32.496 | 13.7 | 105.103 | 32.519 | 13.7 | 0.00 | 0.00 | 0.00 | 0.00 | 0.00 | 0.00 |
| 0232 | 105.092 | 32.481 | 12.2 | 105.059 | 32.459 | 12.2 | 105.037 | 32.473 | 13.7 | 105.070 | 32.496 | 13.7 | 0.00 | 0.00 | 0.00 | 0.00 | 0.00 | 0.00 |
| 0233 | 105.059 | 32.459 | 12.2 | 105.026 | 32.436 | 12.2 | 105.004 | 32.451 | 13.7 | 105.037 | 32.473 | 13.7 | 0.00 | 0.00 | 0.00 | 0.00 | 0.00 | 0.00 |
| 0234 | 105.026 | 32.436 | 12.2 | 104.993 | 32.413 | 12.2 | 104.971 | 32.428 | 13.7 | 105.004 | 32.451 | 13.7 | 0.00 | 0.00 | 0.00 | 0.00 | 0.00 | 0.00 |
| 0235 | 104.993 | 32.413 | 12.2 | 104.960 | 32.391 | 12.2 | 104.938 | 32.405 | 13.7 | 104.971 | 32.428 | 13.7 | 0.00 | 0.00 | 0.00 | 0.00 | 0.00 | 0.00 |
| 0236 | 104.960 | 32.391 | 12.2 | 104.927 | 32.368 | 12.2 | 104.905 | 32.383 | 13.7 | 104.938 | 32.405 | 13.7 | 0.00 | 0.00 | 0.00 | 0.00 | 0.00 | 0.00 |
| 0237 | 104.927 | 32.368 | 12.2 | 104.894 | 32.345 | 12.2 | 104.872 | 32.360 | 13.7 | 104.905 | 32.383 | 13.7 | 0.00 | 0.00 | 0.00 | 0.00 | 0.00 | 0.00 |
| 0238 | 104.894 | 32.345 | 12.2 | 104.861 | 32.322 | 12.2 | 104.839 | 32.337 | 13.7 | 104.872 | 32.360 | 13.7 | 0.00 | 0.00 | 0.00 | 0.00 | 0.00 | 0.00 |
| 0239 | 104.861 | 32.322 | 12.2 | 104.828 | 32.300 | 12.2 | 104.806 | 32.315 | 13.7 | 104.839 | 32.337 | 13.7 | 0.00 | 0.00 | 0.00 | 0.00 | 0.00 | 0.00 |
| 0240 | 104.828 | 32.300 | 12.2 | 104.795 | 32.277 | 12.2 | 104.773 | 32.292 | 13.7 | 104.806 | 32.315 | 13.7 | 0.00 | 0.00 | 0.00 | 0.00 | 0.00 | 0.00 |
| 0241 | 104.795 | 32.277 | 12.2 | 104.759 | 32.245 | 12.2 | 104.740 | 32.263 | 13.7 | 104.773 | 32.288 | 13.7 | 0.00 | 0.00 | 0.00 | 0.00 | 0.00 | 0.00 |
| 0242 | 104.759 | 32.245 | 12.2 | 104.732 | 32.220 | 12.2 | 104.713 | 32.238 | 13.7 | 104.740 | 32.263 | 13.7 | 0.00 | 0.00 | 0.00 | 0.00 | 0.00 | 0.00 |
| 0243 | 104.732 | 32.220 | 12.2 | 104.704 | 32.195 | 12.2 | 104.686 | 32.213 | 13.7 | 104.713 | 32.238 | 13.7 | 0.00 | 0.00 | 0.00 | 0.00 | 0.00 | 0.00 |
| 0244 | 104.704 | 32.195 | 12.2 | 104.677 | 32.170 | 12.2 | 104.658 | 32.188 | 13.7 | 104.686 | 32.213 | 13.7 | 0.00 | 0.00 | 0.00 | 0.00 | 0.00 | 0.00 |
| 0245 | 104.677 | 32.170 | 12.2 | 104.650 | 32.145 | 12.2 | 104.631 | 32.163 | 13.7 | 104.658 | 32.188 | 13.7 | 0.00 | 0.00 | 0.00 | 0.00 | 0.00 | 0.00 |
| 0246 | 104.650 | 32.145 | 12.2 | 104.623 | 32.120 | 12.2 | 104.604 | 32.138 | 13.7 | 104.631 | 32.163 | 13.7 | 0.00 | 0.00 | 0.00 | 0.05 | 0.00 | 0.05 |
| 0247 | 104.623 | 32.120 | 12.2 | 104.595 | 32.095 | 12.2 | 104.577 | 32.112 | 13.7 | 104.604 | 32.138 | 13.7 | 0.00 | 0.00 | 0.00 | 0.00 | 0.00 | 0.00 |
| 0248 | 104.595 | 32.095 | 12.2 | 104.568 | 32.070 | 12.2 | 104.549 | 32.087 | 13.7 | 104.577 | 32.112 | 13.7 | 0.00 | 0.00 | 0.00 | 0.00 | 0.00 | 0.00 |
| 0249 | 104.568 | 32.070 | 12.2 | 104.541 | 32.045 | 12.2 | 104.522 | 32.062 | 13.7 | 104.549 | 32.087 | 13.7 | 0.00 | 0.00 | 0.00 | 0.01 | 0.00 | 0.01 |

|      |         |        |      |         |        |      |         |        |      |         |        |      |      |      |      |      |      |      |
|------|---------|--------|------|---------|--------|------|---------|--------|------|---------|--------|------|------|------|------|------|------|------|
| 0250 | 104.541 | 32.045 | 12.2 | 104.514 | 32.020 | 12.2 | 104.495 | 32.037 | 13.7 | 104.522 | 32.062 | 13.7 | 0.00 | 0.11 | 0.11 | 0.00 | 0.09 | 0.09 |
| 0251 | 104.514 | 32.020 | 12.2 | 104.486 | 31.995 | 12.2 | 104.468 | 32.012 | 13.7 | 104.495 | 32.037 | 13.7 | 0.00 | 0.60 | 0.60 | 0.00 | 0.12 | 0.12 |
| 0252 | 104.486 | 31.995 | 12.2 | 104.459 | 31.970 | 12.2 | 104.440 | 31.987 | 13.7 | 104.468 | 32.012 | 13.7 | 1.11 | 0.57 | 1.25 | 0.13 | 0.09 | 0.16 |
| 0253 | 105.767 | 32.976 | 13.7 | 105.734 | 32.953 | 13.7 | 105.711 | 32.969 | 14.8 | 105.744 | 32.992 | 14.8 | 0.63 | 0.00 | 0.63 | 0.17 | 0.05 | 0.18 |
| 0254 | 105.734 | 32.953 | 13.7 | 105.701 | 32.931 | 13.7 | 105.678 | 32.947 | 14.8 | 105.711 | 32.969 | 14.8 | 0.00 | 0.00 | 0.00 | 0.00 | 0.01 | 0.01 |
| 0255 | 105.701 | 32.931 | 13.7 | 105.668 | 32.908 | 13.7 | 105.645 | 32.924 | 14.8 | 105.678 | 32.947 | 14.8 | 0.00 | 0.00 | 0.00 | 0.00 | 0.00 | 0.00 |
| 0256 | 105.668 | 32.908 | 13.7 | 105.635 | 32.885 | 13.7 | 105.612 | 32.901 | 14.8 | 105.645 | 32.924 | 14.8 | 0.00 | 0.00 | 0.00 | 0.00 | 0.01 | 0.01 |
| 0257 | 105.635 | 32.885 | 13.7 | 105.602 | 32.862 | 13.7 | 105.579 | 32.879 | 14.8 | 105.612 | 32.901 | 14.8 | 0.00 | 0.00 | 0.00 | 0.00 | 0.02 | 0.02 |
| 0258 | 105.602 | 32.862 | 13.7 | 105.569 | 32.840 | 13.7 | 105.546 | 32.856 | 14.8 | 105.579 | 32.879 | 14.8 | 0.68 | 0.00 | 0.68 | 0.00 | 0.06 | 0.06 |
| 0259 | 105.569 | 32.840 | 13.7 | 105.536 | 32.817 | 13.7 | 105.513 | 32.833 | 14.8 | 105.546 | 32.856 | 14.8 | 0.00 | 0.08 | 0.08 | 0.00 | 0.12 | 0.12 |
| 0260 | 105.536 | 32.817 | 13.7 | 105.503 | 32.794 | 13.7 | 105.480 | 32.810 | 14.8 | 105.513 | 32.833 | 14.8 | 0.00 | 0.09 | 0.09 | 0.00 | 0.11 | 0.11 |
| 0261 | 105.503 | 32.794 | 13.7 | 105.470 | 32.772 | 13.7 | 105.447 | 32.788 | 14.8 | 105.480 | 32.810 | 14.8 | 1.00 | 0.00 | 1.00 | 0.01 | 0.03 | 0.03 |
| 0262 | 105.470 | 32.772 | 13.7 | 105.437 | 32.749 | 13.7 | 105.414 | 32.765 | 14.8 | 105.447 | 32.788 | 14.8 | 0.00 | 0.00 | 0.00 | 0.07 | 0.00 | 0.07 |
| 0263 | 105.437 | 32.749 | 13.7 | 105.404 | 32.726 | 13.7 | 105.381 | 32.742 | 14.8 | 105.414 | 32.765 | 14.8 | 0.00 | 0.00 | 0.00 | 0.05 | 0.00 | 0.05 |
| 0264 | 105.404 | 32.726 | 13.7 | 105.371 | 32.704 | 13.7 | 105.348 | 32.720 | 14.8 | 105.381 | 32.742 | 14.8 | 0.00 | 0.00 | 0.00 | 0.00 | 0.00 | 0.00 |
| 0265 | 105.371 | 32.704 | 13.7 | 105.338 | 32.681 | 13.7 | 105.315 | 32.697 | 14.8 | 105.348 | 32.720 | 14.8 | 0.00 | 0.00 | 0.00 | 0.00 | 0.00 | 0.00 |
| 0266 | 105.338 | 32.681 | 13.7 | 105.305 | 32.658 | 13.7 | 105.282 | 32.674 | 14.8 | 105.315 | 32.697 | 14.8 | 0.00 | 0.00 | 0.00 | 0.00 | 0.00 | 0.00 |
| 0267 | 105.305 | 32.658 | 13.7 | 105.272 | 32.636 | 13.7 | 105.249 | 32.652 | 14.8 | 105.282 | 32.674 | 14.8 | 0.00 | 0.00 | 0.00 | 0.00 | 0.00 | 0.00 |
| 0268 | 105.272 | 32.636 | 13.7 | 105.239 | 32.613 | 13.7 | 105.216 | 32.629 | 14.8 | 105.249 | 32.652 | 14.8 | 0.18 | 0.00 | 0.18 | 0.03 | 0.00 | 0.03 |
| 0269 | 105.239 | 32.613 | 13.7 | 105.206 | 32.590 | 13.7 | 105.183 | 32.606 | 14.8 | 105.216 | 32.629 | 14.8 | 0.05 | 0.00 | 0.05 | 0.00 | 0.00 | 0.00 |
| 0270 | 105.206 | 32.590 | 13.7 | 105.173 | 32.568 | 13.7 | 105.150 | 32.584 | 14.8 | 105.183 | 32.606 | 14.8 | 0.00 | 0.00 | 0.00 | 0.00 | 0.00 | 0.00 |
| 0271 | 105.173 | 32.568 | 13.7 | 105.140 | 32.545 | 13.7 | 105.117 | 32.561 | 14.8 | 105.150 | 32.584 | 14.8 | 0.00 | 0.00 | 0.00 | 0.00 | 0.00 | 0.00 |
| 0272 | 105.140 | 32.545 | 13.7 | 105.107 | 32.522 | 13.7 | 105.084 | 32.538 | 14.8 | 105.117 | 32.561 | 14.8 | 0.00 | 0.00 | 0.00 | 0.00 | 0.00 | 0.00 |
| 0273 | 105.107 | 32.522 | 13.7 | 105.074 | 32.499 | 13.7 | 105.051 | 32.515 | 14.8 | 105.084 | 32.538 | 14.8 | 0.00 | 0.00 | 0.00 | 0.00 | 0.00 | 0.00 |
| 0274 | 105.074 | 32.499 | 13.7 | 105.041 | 32.477 | 13.7 | 105.018 | 32.493 | 14.8 | 105.051 | 32.515 | 14.8 | 0.00 | 0.00 | 0.00 | 0.00 | 0.00 | 0.00 |
| 0275 | 105.041 | 32.477 | 13.7 | 105.008 | 32.454 | 13.7 | 104.985 | 32.470 | 14.8 | 105.018 | 32.493 | 14.8 | 0.00 | 0.00 | 0.00 | 0.00 | 0.00 | 0.00 |
| 0276 | 105.008 | 32.454 | 13.7 | 104.975 | 32.431 | 13.7 | 104.952 | 32.447 | 14.8 | 104.985 | 32.470 | 14.8 | 0.00 | 0.00 | 0.00 | 0.00 | 0.00 | 0.00 |
| 0277 | 104.975 | 32.431 | 13.7 | 104.942 | 32.409 | 13.7 | 104.919 | 32.425 | 14.8 | 104.952 | 32.447 | 14.8 | 0.00 | 0.00 | 0.00 | 0.00 | 0.00 | 0.00 |
| 0278 | 104.942 | 32.409 | 13.7 | 104.909 | 32.386 | 13.7 | 104.886 | 32.402 | 14.8 | 104.919 | 32.425 | 14.8 | 0.00 | 0.00 | 0.00 | 0.00 | 0.00 | 0.00 |
| 0279 | 104.909 | 32.386 | 13.7 | 104.876 | 32.363 | 13.7 | 104.853 | 32.379 | 14.8 | 104.886 | 32.402 | 14.8 | 0.00 | 0.00 | 0.00 | 0.00 | 0.00 | 0.00 |
| 0280 | 104.876 | 32.363 | 13.7 | 104.843 | 32.341 | 13.7 | 104.820 | 32.357 | 14.8 | 104.853 | 32.379 | 14.8 | 0.00 | 0.00 | 0.00 | 0.00 | 0.00 | 0.00 |
| 0281 | 104.843 | 32.341 | 13.7 | 104.810 | 32.318 | 13.7 | 104.787 | 32.334 | 14.8 | 104.820 | 32.357 | 14.8 | 0.00 | 0.00 | 0.00 | 0.00 | 0.00 | 0.00 |
| 0282 | 104.810 | 32.318 | 13.7 | 104.777 | 32.295 | 13.7 | 104.754 | 32.311 | 14.8 | 104.787 | 32.334 | 14.8 | 0.00 | 0.00 | 0.00 | 0.00 | 0.00 | 0.00 |
| 0283 | 104.766 | 32.286 | 13.7 | 104.739 | 32.261 | 13.7 | 104.718 | 32.280 | 14.8 | 104.746 | 32.305 | 14.8 | 0.09 | 0.00 | 0.09 | 0.11 | 0.00 | 0.11 |
| 0284 | 104.739 | 32.261 | 13.7 | 104.711 | 32.236 | 13.7 | 104.691 | 32.255 | 14.8 | 104.718 | 32.280 | 14.8 | 0.04 | 0.00 | 0.04 | 0.14 | 0.00 | 0.14 |
| 0285 | 104.711 | 32.236 | 13.7 | 104.684 | 32.211 | 13.7 | 104.664 | 32.230 | 14.8 | 104.691 | 32.255 | 14.8 | 0.00 | 0.00 | 0.00 | 0.09 | 0.00 | 0.09 |
| 0286 | 104.684 | 32.211 | 13.7 | 104.657 | 32.186 | 13.7 | 104.637 | 32.205 | 14.8 | 104.664 | 32.230 | 14.8 | 0.00 | 0.00 | 0.00 | 0.03 | 0.03 | 0.04 |
| 0287 | 104.657 | 32.186 | 13.7 | 104.630 | 32.161 | 13.7 | 104.609 | 32.180 | 14.8 | 104.637 | 32.205 | 14.8 | 0.00 | 0.00 | 0.00 | 0.00 | 0.02 | 0.02 |
| 0288 | 104.630 | 32.161 | 13.7 | 104.603 | 32.136 | 13.7 | 104.582 | 32.155 | 14.8 | 104.609 | 32.180 | 14.8 | 0.00 | 0.00 | 0.00 | 0.00 | 0.00 | 0.00 |

|      |         |        |      |         |        |      |         |        |      |         |        |      |      |      |      |      |      |      |
|------|---------|--------|------|---------|--------|------|---------|--------|------|---------|--------|------|------|------|------|------|------|------|
| 0289 | 104.603 | 32.136 | 13.7 | 104.575 | 32.111 | 13.7 | 104.555 | 32.130 | 14.8 | 104.582 | 32.155 | 14.8 | 0.00 | 0.00 | 0.00 | 0.00 | 0.00 | 0.00 |
| 0290 | 104.575 | 32.111 | 13.7 | 104.548 | 32.086 | 13.7 | 104.528 | 32.105 | 14.8 | 104.555 | 32.130 | 14.8 | 0.00 | 0.00 | 0.00 | 0.00 | 0.00 | 0.00 |
| 0291 | 104.548 | 32.086 | 13.7 | 104.521 | 32.061 | 13.7 | 104.500 | 32.080 | 14.8 | 104.528 | 32.105 | 14.8 | 0.00 | 0.00 | 0.00 | 0.04 | 0.00 | 0.04 |
| 0292 | 104.521 | 32.061 | 13.7 | 104.493 | 32.036 | 13.7 | 104.473 | 32.055 | 14.8 | 104.500 | 32.080 | 14.8 | 0.00 | 0.00 | 0.00 | 0.00 | 0.00 | 0.00 |
| 0293 | 104.493 | 32.036 | 13.7 | 104.466 | 32.011 | 13.7 | 104.446 | 32.030 | 14.8 | 104.473 | 32.055 | 14.8 | 0.00 | 0.06 | 0.06 | 0.00 | 0.04 | 0.04 |
| 0294 | 104.466 | 32.011 | 13.7 | 104.439 | 31.986 | 13.7 | 104.419 | 32.005 | 14.8 | 104.446 | 32.030 | 14.8 | 2.18 | 0.02 | 2.18 | 0.07 | 0.03 | 0.08 |
| 0295 | 105.748 | 32.996 | 14.7 | 105.715 | 32.973 | 14.7 | 105.691 | 32.990 | 15.3 | 105.724 | 33.013 | 15.3 | 1.00 | 0.00 | 1.00 | 0.06 | 0.00 | 0.06 |
| 0296 | 105.715 | 32.973 | 14.7 | 105.682 | 32.950 | 14.7 | 105.658 | 32.967 | 15.3 | 105.691 | 32.990 | 15.3 | 0.00 | 0.00 | 0.00 | 0.00 | 0.01 | 0.01 |
| 0297 | 105.682 | 32.950 | 14.7 | 105.649 | 32.928 | 14.7 | 105.625 | 32.944 | 15.3 | 105.658 | 32.967 | 15.3 | 0.00 | 0.00 | 0.00 | 0.00 | 0.02 | 0.02 |
| 0298 | 105.649 | 32.928 | 14.7 | 105.616 | 32.905 | 14.7 | 105.592 | 32.922 | 15.3 | 105.625 | 32.944 | 15.3 | 0.00 | 0.00 | 0.00 | 0.00 | 0.02 | 0.02 |
| 0299 | 105.616 | 32.905 | 14.7 | 105.583 | 32.882 | 14.7 | 105.559 | 32.899 | 15.3 | 105.592 | 32.922 | 15.3 | 0.00 | 0.00 | 0.00 | 0.00 | 0.02 | 0.02 |
| 0300 | 105.583 | 32.882 | 14.7 | 105.550 | 32.859 | 14.7 | 105.526 | 32.876 | 15.3 | 105.559 | 32.899 | 15.3 | 0.92 | 0.00 | 0.92 | 0.00 | 0.02 | 0.02 |
| 0301 | 105.550 | 32.859 | 14.7 | 105.517 | 32.837 | 14.7 | 105.493 | 32.854 | 15.3 | 105.526 | 32.876 | 15.3 | 0.00 | 0.00 | 0.00 | 0.00 | 0.02 | 0.02 |
| 0302 | 105.517 | 32.837 | 14.7 | 105.484 | 32.814 | 14.7 | 105.460 | 32.831 | 15.3 | 105.493 | 32.854 | 15.3 | 0.00 | 0.00 | 0.00 | 0.00 | 0.02 | 0.02 |
| 0303 | 105.484 | 32.814 | 14.7 | 105.451 | 32.791 | 14.7 | 105.427 | 32.808 | 15.3 | 105.460 | 32.831 | 15.3 | 1.00 | 0.00 | 1.00 | 0.07 | 0.00 | 0.07 |
| 0304 | 105.451 | 32.791 | 14.7 | 105.418 | 32.769 | 14.7 | 105.394 | 32.785 | 15.3 | 105.427 | 32.808 | 15.3 | 0.00 | 0.00 | 0.00 | 0.15 | 0.00 | 0.15 |
| 0305 | 105.418 | 32.769 | 14.7 | 105.385 | 32.746 | 14.7 | 105.361 | 32.763 | 15.3 | 105.394 | 32.785 | 15.3 | 0.00 | 0.00 | 0.00 | 0.12 | 0.00 | 0.12 |
| 0306 | 105.385 | 32.746 | 14.7 | 105.352 | 32.723 | 14.7 | 105.328 | 32.740 | 15.3 | 105.361 | 32.763 | 15.3 | 0.00 | 0.00 | 0.00 | 0.01 | 0.00 | 0.01 |
| 0307 | 105.352 | 32.723 | 14.7 | 105.319 | 32.701 | 14.7 | 105.295 | 32.717 | 15.3 | 105.328 | 32.740 | 15.3 | 0.00 | 0.00 | 0.00 | 0.00 | 0.00 | 0.00 |
| 0308 | 105.319 | 32.701 | 14.7 | 105.286 | 32.678 | 14.7 | 105.262 | 32.695 | 15.3 | 105.295 | 32.717 | 15.3 | 0.00 | 0.00 | 0.00 | 0.00 | 0.00 | 0.00 |
| 0309 | 105.286 | 32.678 | 14.7 | 105.253 | 32.655 | 14.7 | 105.229 | 32.672 | 15.3 | 105.262 | 32.695 | 15.3 | 0.00 | 0.00 | 0.00 | 0.00 | 0.00 | 0.00 |
| 0310 | 105.253 | 32.655 | 14.7 | 105.220 | 32.633 | 14.7 | 105.196 | 32.649 | 15.3 | 105.229 | 32.672 | 15.3 | 0.34 | 0.00 | 0.34 | 0.05 | 0.00 | 0.05 |
| 0311 | 105.220 | 32.633 | 14.7 | 105.187 | 32.610 | 14.7 | 105.163 | 32.627 | 15.3 | 105.196 | 32.649 | 15.3 | 0.23 | 0.00 | 0.23 | 0.02 | 0.00 | 0.02 |
| 0312 | 105.187 | 32.610 | 14.7 | 105.154 | 32.587 | 14.7 | 105.130 | 32.604 | 15.3 | 105.163 | 32.627 | 15.3 | 0.00 | 0.00 | 0.00 | 0.00 | 0.00 | 0.00 |
| 0313 | 105.154 | 32.587 | 14.7 | 105.121 | 32.565 | 14.7 | 105.097 | 32.581 | 15.3 | 105.130 | 32.604 | 15.3 | 0.00 | 0.00 | 0.00 | 0.00 | 0.00 | 0.00 |
| 0314 | 105.121 | 32.565 | 14.7 | 105.088 | 32.542 | 14.7 | 105.064 | 32.559 | 15.3 | 105.097 | 32.581 | 15.3 | 0.00 | 0.00 | 0.00 | 0.00 | 0.00 | 0.00 |
| 0315 | 105.088 | 32.542 | 14.7 | 105.055 | 32.519 | 14.7 | 105.031 | 32.536 | 15.3 | 105.064 | 32.559 | 15.3 | 0.00 | 0.00 | 0.00 | 0.00 | 0.00 | 0.00 |
| 0316 | 105.055 | 32.519 | 14.7 | 105.022 | 32.496 | 14.7 | 104.998 | 32.513 | 15.3 | 105.031 | 32.536 | 15.3 | 0.00 | 0.00 | 0.00 | 0.00 | 0.00 | 0.00 |
| 0317 | 105.022 | 32.496 | 14.7 | 104.989 | 32.474 | 14.7 | 104.965 | 32.490 | 15.3 | 104.998 | 32.513 | 15.3 | 0.00 | 0.00 | 0.00 | 0.00 | 0.00 | 0.00 |
| 0318 | 104.989 | 32.474 | 14.7 | 104.956 | 32.451 | 14.7 | 104.932 | 32.468 | 15.3 | 104.965 | 32.490 | 15.3 | 0.00 | 0.00 | 0.00 | 0.00 | 0.00 | 0.00 |
| 0319 | 104.956 | 32.451 | 14.7 | 104.923 | 32.428 | 14.7 | 104.899 | 32.445 | 15.3 | 104.932 | 32.468 | 15.3 | 0.00 | 0.00 | 0.00 | 0.00 | 0.00 | 0.00 |
| 0320 | 104.923 | 32.428 | 14.7 | 104.890 | 32.406 | 14.7 | 104.866 | 32.422 | 15.3 | 104.899 | 32.445 | 15.3 | 0.00 | 0.00 | 0.00 | 0.00 | 0.00 | 0.00 |
| 0321 | 104.890 | 32.406 | 14.7 | 104.857 | 32.383 | 14.7 | 104.833 | 32.400 | 15.3 | 104.866 | 32.422 | 15.3 | 0.00 | 0.00 | 0.00 | 0.00 | 0.00 | 0.00 |
| 0322 | 104.857 | 32.383 | 14.7 | 104.824 | 32.360 | 14.7 | 104.800 | 32.377 | 15.3 | 104.833 | 32.400 | 15.3 | 0.00 | 0.00 | 0.00 | 0.00 | 0.00 | 0.00 |
| 0323 | 104.824 | 32.360 | 14.7 | 104.791 | 32.338 | 14.7 | 104.767 | 32.354 | 15.3 | 104.800 | 32.377 | 15.3 | 0.00 | 0.00 | 0.00 | 0.00 | 0.00 | 0.00 |
| 0324 | 104.791 | 32.338 | 14.7 | 104.758 | 32.315 | 14.7 | 104.734 | 32.332 | 15.3 | 104.767 | 32.354 | 15.3 | 0.00 | 0.00 | 0.00 | 0.04 | 0.00 | 0.04 |
| 0325 | 104.744 | 32.304 | 14.7 | 104.717 | 32.279 | 14.7 | 104.695 | 32.298 | 15.3 | 104.723 | 32.323 | 15.3 | 0.21 | 0.00 | 0.21 | 0.16 | 0.00 | 0.16 |
| 0326 | 104.717 | 32.279 | 14.7 | 104.690 | 32.254 | 14.7 | 104.668 | 32.273 | 15.3 | 104.695 | 32.298 | 15.3 | 0.12 | 0.00 | 0.12 | 0.21 | 0.03 | 0.21 |
| 0327 | 104.690 | 32.254 | 14.7 | 104.662 | 32.229 | 14.7 | 104.641 | 32.248 | 15.3 | 104.668 | 32.273 | 15.3 | 0.01 | 0.21 | 0.21 | 0.12 | 0.08 | 0.14 |

|      |         |        |      |         |        |      |         |        |      |         |        |      |      |      |      |      |      |      |
|------|---------|--------|------|---------|--------|------|---------|--------|------|---------|--------|------|------|------|------|------|------|------|
| 0328 | 104.662 | 32.229 | 14.7 | 104.635 | 32.204 | 14.7 | 104.614 | 32.223 | 15.3 | 104.641 | 32.248 | 15.3 | 0.00 | 0.39 | 0.39 | 0.03 | 0.10 | 0.10 |
| 0329 | 104.635 | 32.204 | 14.7 | 104.608 | 32.179 | 14.7 | 104.587 | 32.198 | 15.3 | 104.614 | 32.223 | 15.3 | 0.00 | 0.44 | 0.44 | 0.00 | 0.09 | 0.09 |
| 0330 | 104.608 | 32.179 | 14.7 | 104.581 | 32.154 | 14.7 | 104.559 | 32.173 | 15.3 | 104.587 | 32.198 | 15.3 | 0.00 | 0.33 | 0.33 | 0.00 | 0.07 | 0.07 |
| 0331 | 104.581 | 32.154 | 14.7 | 104.553 | 32.129 | 14.7 | 104.532 | 32.148 | 15.3 | 104.559 | 32.173 | 15.3 | 0.00 | 0.19 | 0.19 | 0.00 | 0.09 | 0.09 |
| 0332 | 104.553 | 32.129 | 14.7 | 104.526 | 32.103 | 14.7 | 104.505 | 32.123 | 15.3 | 104.532 | 32.148 | 15.3 | 0.00 | 0.13 | 0.13 | 0.00 | 0.09 | 0.09 |
| 0333 | 104.526 | 32.103 | 14.7 | 104.499 | 32.078 | 14.7 | 104.478 | 32.098 | 15.3 | 104.505 | 32.123 | 15.3 | 0.00 | 0.18 | 0.18 | 0.05 | 0.07 | 0.09 |
| 0334 | 104.499 | 32.078 | 14.7 | 104.472 | 32.053 | 14.7 | 104.450 | 32.073 | 15.3 | 104.478 | 32.098 | 15.3 | 0.00 | 0.24 | 0.24 | 0.00 | 0.06 | 0.06 |
| 0335 | 104.472 | 32.053 | 14.7 | 104.444 | 32.029 | 14.7 | 104.423 | 32.048 | 15.3 | 104.450 | 32.073 | 15.3 | 0.00 | 0.19 | 0.19 | 0.00 | 0.04 | 0.04 |
| 0336 | 104.444 | 32.029 | 14.7 | 104.417 | 32.003 | 14.7 | 104.396 | 32.023 | 15.3 | 104.423 | 32.048 | 15.3 | 2.71 | 0.00 | 2.71 | 0.07 | 0.00 | 0.07 |
| 0337 | 105.729 | 33.016 | 15.3 | 105.696 | 32.994 | 15.3 | 105.671 | 33.011 | 15.6 | 105.704 | 33.033 | 15.6 | 1.00 | 0.00 | 1.00 | 0.08 | 0.00 | 0.08 |
| 0338 | 105.696 | 32.994 | 15.3 | 105.662 | 32.971 | 15.3 | 105.638 | 32.988 | 15.6 | 105.671 | 33.011 | 15.6 | 0.00 | 0.00 | 0.00 | 0.00 | 0.01 | 0.01 |
| 0339 | 105.662 | 32.971 | 15.3 | 105.629 | 32.948 | 15.3 | 105.605 | 32.965 | 15.6 | 105.638 | 32.988 | 15.6 | 0.00 | 0.00 | 0.00 | 0.00 | 0.03 | 0.03 |
| 0340 | 105.629 | 32.948 | 15.3 | 105.597 | 32.925 | 15.3 | 105.572 | 32.943 | 15.6 | 105.605 | 32.965 | 15.6 | 0.00 | 0.00 | 0.00 | 0.00 | 0.03 | 0.03 |
| 0341 | 105.597 | 32.925 | 15.3 | 105.564 | 32.903 | 15.3 | 105.539 | 32.920 | 15.6 | 105.572 | 32.943 | 15.6 | 0.00 | 0.00 | 0.00 | 0.00 | 0.02 | 0.02 |
| 0342 | 105.564 | 32.903 | 15.3 | 105.531 | 32.880 | 15.3 | 105.506 | 32.897 | 15.6 | 105.539 | 32.920 | 15.6 | 1.00 | 0.00 | 1.00 | 0.00 | 0.00 | 0.00 |
| 0343 | 105.531 | 32.880 | 15.3 | 105.498 | 32.857 | 15.3 | 105.473 | 32.874 | 15.6 | 105.506 | 32.897 | 15.6 | 0.00 | 0.00 | 0.00 | 0.00 | 0.00 | 0.00 |
| 0344 | 105.498 | 32.857 | 15.3 | 105.465 | 32.835 | 15.3 | 105.440 | 32.852 | 15.6 | 105.473 | 32.874 | 15.6 | 0.00 | 0.00 | 0.00 | 0.00 | 0.00 | 0.00 |
| 0345 | 105.465 | 32.835 | 15.3 | 105.431 | 32.812 | 15.3 | 105.407 | 32.829 | 15.6 | 105.440 | 32.852 | 15.6 | 1.00 | 0.00 | 1.00 | 0.07 | 0.00 | 0.07 |
| 0346 | 105.431 | 32.812 | 15.3 | 105.398 | 32.789 | 15.3 | 105.374 | 32.806 | 15.6 | 105.407 | 32.829 | 15.6 | 0.00 | 0.00 | 0.00 | 0.13 | 0.00 | 0.13 |
| 0347 | 105.398 | 32.789 | 15.3 | 105.365 | 32.767 | 15.3 | 105.341 | 32.784 | 15.6 | 105.374 | 32.806 | 15.6 | 0.00 | 0.00 | 0.00 | 0.10 | 0.00 | 0.10 |
| 0348 | 105.365 | 32.767 | 15.3 | 105.332 | 32.744 | 15.3 | 105.308 | 32.761 | 15.6 | 105.341 | 32.784 | 15.6 | 0.00 | 0.00 | 0.00 | 0.02 | 0.00 | 0.02 |
| 0349 | 105.332 | 32.744 | 15.3 | 105.299 | 32.721 | 15.3 | 105.275 | 32.738 | 15.6 | 105.308 | 32.761 | 15.6 | 0.00 | 0.00 | 0.00 | 0.00 | 0.00 | 0.00 |
| 0350 | 105.299 | 32.721 | 15.3 | 105.266 | 32.699 | 15.3 | 105.242 | 32.715 | 15.6 | 105.275 | 32.738 | 15.6 | 0.00 | 0.00 | 0.00 | 0.00 | 0.00 | 0.00 |
| 0351 | 105.266 | 32.699 | 15.3 | 105.233 | 32.676 | 15.3 | 105.209 | 32.693 | 15.6 | 105.242 | 32.715 | 15.6 | 0.00 | 0.00 | 0.00 | 0.00 | 0.00 | 0.00 |
| 0352 | 105.233 | 32.676 | 15.3 | 105.200 | 32.653 | 15.3 | 105.176 | 32.670 | 15.6 | 105.209 | 32.693 | 15.6 | 0.27 | 0.00 | 0.27 | 0.04 | 0.00 | 0.04 |
| 0353 | 105.200 | 32.653 | 15.3 | 105.167 | 32.630 | 15.3 | 105.143 | 32.647 | 15.6 | 105.176 | 32.670 | 15.6 | 0.21 | 0.00 | 0.21 | 0.01 | 0.00 | 0.01 |
| 0354 | 105.167 | 32.630 | 15.3 | 105.134 | 32.608 | 15.3 | 105.110 | 32.625 | 15.6 | 105.143 | 32.647 | 15.6 | 0.00 | 0.00 | 0.00 | 0.00 | 0.00 | 0.00 |
| 0355 | 105.134 | 32.608 | 15.3 | 105.101 | 32.585 | 15.3 | 105.077 | 32.602 | 15.6 | 105.110 | 32.625 | 15.6 | 0.00 | 0.00 | 0.00 | 0.00 | 0.00 | 0.00 |
| 0356 | 105.101 | 32.585 | 15.3 | 105.068 | 32.562 | 15.3 | 105.044 | 32.579 | 15.6 | 105.077 | 32.602 | 15.6 | 0.00 | 0.00 | 0.00 | 0.00 | 0.00 | 0.00 |
| 0357 | 105.068 | 32.562 | 15.3 | 105.035 | 32.540 | 15.3 | 105.011 | 32.557 | 15.6 | 105.044 | 32.579 | 15.6 | 0.00 | 0.00 | 0.00 | 0.00 | 0.00 | 0.00 |
| 0358 | 105.035 | 32.540 | 15.3 | 105.002 | 32.517 | 15.3 | 104.978 | 32.534 | 15.6 | 105.011 | 32.557 | 15.6 | 0.00 | 0.00 | 0.00 | 0.00 | 0.00 | 0.00 |
| 0359 | 105.002 | 32.517 | 15.3 | 104.969 | 32.494 | 15.3 | 104.945 | 32.511 | 15.6 | 104.978 | 32.534 | 15.6 | 0.00 | 0.00 | 0.00 | 0.00 | 0.00 | 0.00 |
| 0360 | 104.969 | 32.494 | 15.3 | 104.936 | 32.472 | 15.3 | 104.912 | 32.489 | 15.6 | 104.945 | 32.511 | 15.6 | 0.00 | 0.00 | 0.00 | 0.00 | 0.00 | 0.00 |
| 0361 | 104.936 | 32.472 | 15.3 | 104.903 | 32.449 | 15.3 | 104.879 | 32.466 | 15.6 | 104.912 | 32.489 | 15.6 | 0.00 | 0.00 | 0.00 | 0.00 | 0.00 | 0.00 |
| 0362 | 104.903 | 32.449 | 15.3 | 104.870 | 32.426 | 15.3 | 104.846 | 32.443 | 15.6 | 104.879 | 32.466 | 15.6 | 0.00 | 0.00 | 0.00 | 0.00 | 0.00 | 0.00 |
| 0363 | 104.870 | 32.426 | 15.3 | 104.837 | 32.404 | 15.3 | 104.812 | 32.420 | 15.6 | 104.846 | 32.443 | 15.6 | 0.00 | 0.00 | 0.00 | 0.00 | 0.00 | 0.00 |
| 0364 | 104.837 | 32.404 | 15.3 | 104.804 | 32.381 | 15.3 | 104.779 | 32.398 | 15.6 | 104.812 | 32.420 | 15.6 | 0.00 | 0.00 | 0.00 | 0.00 | 0.00 | 0.00 |
| 0365 | 104.804 | 32.381 | 15.3 | 104.771 | 32.358 | 15.3 | 104.746 | 32.375 | 15.6 | 104.779 | 32.398 | 15.6 | 0.00 | 0.00 | 0.00 | 0.00 | 0.00 | 0.00 |
| 0366 | 104.771 | 32.358 | 15.3 | 104.738 | 32.335 | 15.3 | 104.713 | 32.352 | 15.6 | 104.746 | 32.375 | 15.6 | 0.00 | 0.00 | 0.00 | 0.09 | 0.00 | 0.09 |

|      |         |        |      |         |        |      |         |        |      |         |        |      |      |      |      |      |      |      |
|------|---------|--------|------|---------|--------|------|---------|--------|------|---------|--------|------|------|------|------|------|------|------|
| 0367 | 104.721 | 32.322 | 15.3 | 104.694 | 32.297 | 15.3 | 104.672 | 32.316 | 15.6 | 104.700 | 32.342 | 15.6 | 0.16 | 0.50 | 0.52 | 0.10 | 0.11 | 0.15 |
| 0368 | 104.694 | 32.297 | 15.3 | 104.667 | 32.272 | 15.3 | 104.645 | 32.291 | 15.6 | 104.672 | 32.316 | 15.6 | 0.01 | 0.86 | 0.86 | 0.16 | 0.09 | 0.18 |
| 0369 | 104.667 | 32.272 | 15.3 | 104.639 | 32.247 | 15.3 | 104.618 | 32.267 | 15.6 | 104.645 | 32.291 | 15.6 | 0.00 | 1.00 | 1.00 | 0.06 | 0.00 | 0.06 |
| 0370 | 104.639 | 32.247 | 15.3 | 104.612 | 32.222 | 15.3 | 104.591 | 32.241 | 15.6 | 104.618 | 32.267 | 15.6 | 0.00 | 1.00 | 1.00 | 0.00 | 0.00 | 0.00 |
| 0371 | 104.612 | 32.222 | 15.3 | 104.585 | 32.197 | 15.3 | 104.563 | 32.216 | 15.6 | 104.591 | 32.241 | 15.6 | 0.00 | 1.00 | 1.00 | 0.00 | 0.00 | 0.00 |
| 0372 | 104.585 | 32.197 | 15.3 | 104.558 | 32.172 | 15.3 | 104.536 | 32.191 | 15.6 | 104.563 | 32.216 | 15.6 | 0.00 | 0.86 | 0.86 | 0.00 | 0.03 | 0.03 |
| 0373 | 104.558 | 32.172 | 15.3 | 104.530 | 32.147 | 15.3 | 104.509 | 32.166 | 15.6 | 104.536 | 32.191 | 15.6 | 0.00 | 0.69 | 0.69 | 0.00 | 0.10 | 0.10 |
| 0374 | 104.530 | 32.147 | 15.3 | 104.503 | 32.122 | 15.3 | 104.482 | 32.141 | 15.6 | 104.509 | 32.166 | 15.6 | 0.00 | 0.70 | 0.70 | 0.00 | 0.12 | 0.12 |
| 0375 | 104.503 | 32.122 | 15.3 | 104.476 | 32.097 | 15.3 | 104.454 | 32.116 | 15.6 | 104.482 | 32.141 | 15.6 | 0.00 | 0.88 | 0.88 | 0.06 | 0.11 | 0.13 |
| 0376 | 104.476 | 32.097 | 15.3 | 104.449 | 32.072 | 15.3 | 104.427 | 32.091 | 15.6 | 104.454 | 32.116 | 15.6 | 0.00 | 1.01 | 1.01 | 0.00 | 0.10 | 0.10 |
| 0377 | 104.449 | 32.072 | 15.3 | 104.421 | 32.047 | 15.3 | 104.400 | 32.066 | 15.6 | 104.427 | 32.091 | 15.6 | 0.00 | 0.79 | 0.79 | 0.00 | 0.07 | 0.07 |
| 0378 | 104.421 | 32.047 | 15.3 | 104.394 | 32.022 | 15.3 | 104.373 | 32.041 | 15.6 | 104.400 | 32.066 | 15.6 | 2.71 | 0.18 | 2.71 | 0.05 | 0.01 | 0.05 |
| 0379 | 105.709 | 33.037 | 15.6 | 105.675 | 33.014 | 15.6 | 105.651 | 33.032 | 15.9 | 105.684 | 33.054 | 15.9 | 1.00 | 0.00 | 1.00 | 0.02 | 0.00 | 0.02 |
| 0380 | 105.675 | 33.014 | 15.6 | 105.642 | 32.992 | 15.6 | 105.618 | 33.009 | 15.9 | 105.651 | 33.032 | 15.9 | 0.00 | 0.00 | 0.00 | 0.00 | 0.01 | 0.01 |
| 0381 | 105.642 | 32.992 | 15.6 | 105.609 | 32.969 | 15.6 | 105.585 | 32.986 | 15.9 | 105.618 | 33.009 | 15.9 | 0.00 | 0.00 | 0.00 | 0.00 | 0.02 | 0.02 |
| 0382 | 105.609 | 32.969 | 15.6 | 105.576 | 32.946 | 15.6 | 105.552 | 32.963 | 15.9 | 105.585 | 32.986 | 15.9 | 0.00 | 0.00 | 0.00 | 0.00 | 0.02 | 0.02 |
| 0383 | 105.576 | 32.946 | 15.6 | 105.543 | 32.924 | 15.6 | 105.519 | 32.941 | 15.9 | 105.552 | 32.963 | 15.9 | 0.00 | 0.00 | 0.00 | 0.00 | 0.01 | 0.01 |
| 0384 | 105.543 | 32.924 | 15.6 | 105.510 | 32.901 | 15.6 | 105.486 | 32.918 | 15.9 | 105.519 | 32.941 | 15.9 | 1.00 | 0.00 | 1.00 | 0.00 | 0.00 | 0.00 |
| 0385 | 105.510 | 32.901 | 15.6 | 105.477 | 32.878 | 15.6 | 105.453 | 32.895 | 15.9 | 105.486 | 32.918 | 15.9 | 0.00 | 0.00 | 0.00 | 0.00 | 0.00 | 0.00 |
| 0386 | 105.477 | 32.878 | 15.6 | 105.444 | 32.856 | 15.6 | 105.420 | 32.873 | 15.9 | 105.453 | 32.895 | 15.9 | 0.00 | 0.00 | 0.00 | 0.00 | 0.00 | 0.00 |
| 0387 | 105.444 | 32.856 | 15.6 | 105.411 | 32.833 | 15.6 | 105.387 | 32.850 | 15.9 | 105.420 | 32.873 | 15.9 | 1.00 | 0.00 | 1.00 | 0.00 | 0.00 | 0.00 |
| 0388 | 105.411 | 32.833 | 15.6 | 105.378 | 32.810 | 15.6 | 105.354 | 32.827 | 15.9 | 105.387 | 32.850 | 15.9 | 0.00 | 0.00 | 0.00 | 0.00 | 0.00 | 0.00 |
| 0389 | 105.378 | 32.810 | 15.6 | 105.345 | 32.788 | 15.6 | 105.321 | 32.804 | 15.9 | 105.354 | 32.827 | 15.9 | 0.00 | 0.00 | 0.00 | 0.00 | 0.00 | 0.00 |
| 0390 | 105.345 | 32.788 | 15.6 | 105.312 | 32.765 | 15.6 | 105.288 | 32.782 | 15.9 | 105.321 | 32.804 | 15.9 | 0.00 | 0.00 | 0.00 | 0.00 | 0.00 | 0.00 |
| 0391 | 105.312 | 32.765 | 15.6 | 105.279 | 32.742 | 15.6 | 105.255 | 32.759 | 15.9 | 105.288 | 32.782 | 15.9 | 0.00 | 0.00 | 0.00 | 0.00 | 0.00 | 0.00 |
| 0392 | 105.279 | 32.742 | 15.6 | 105.246 | 32.719 | 15.6 | 105.222 | 32.736 | 15.9 | 105.255 | 32.759 | 15.9 | 0.00 | 0.00 | 0.00 | 0.00 | 0.00 | 0.00 |
| 0393 | 105.246 | 32.719 | 15.6 | 105.213 | 32.697 | 15.6 | 105.189 | 32.714 | 15.9 | 105.222 | 32.736 | 15.9 | 0.00 | 0.00 | 0.00 | 0.00 | 0.00 | 0.00 |
| 0394 | 105.213 | 32.697 | 15.6 | 105.180 | 32.674 | 15.6 | 105.156 | 32.691 | 15.9 | 105.189 | 32.714 | 15.9 | 0.00 | 0.00 | 0.00 | 0.00 | 0.00 | 0.00 |
| 0395 | 105.180 | 32.674 | 15.6 | 105.147 | 32.651 | 15.6 | 105.123 | 32.668 | 15.9 | 105.156 | 32.691 | 15.9 | 0.00 | 0.00 | 0.00 | 0.00 | 0.00 | 0.00 |
| 0396 | 105.147 | 32.651 | 15.6 | 105.114 | 32.629 | 15.6 | 105.090 | 32.645 | 15.9 | 105.123 | 32.668 | 15.9 | 0.00 | 0.00 | 0.00 | 0.00 | 0.00 | 0.00 |
| 0397 | 105.114 | 32.629 | 15.6 | 105.081 | 32.606 | 15.6 | 105.056 | 32.623 | 15.9 | 105.090 | 32.645 | 15.9 | 0.00 | 0.00 | 0.00 | 0.00 | 0.00 | 0.00 |
| 0398 | 105.081 | 32.606 | 15.6 | 105.048 | 32.583 | 15.6 | 105.023 | 32.600 | 15.9 | 105.056 | 32.623 | 15.9 | 0.00 | 0.00 | 0.00 | 0.00 | 0.00 | 0.00 |
| 0399 | 105.048 | 32.583 | 15.6 | 105.015 | 32.560 | 15.6 | 104.990 | 32.577 | 15.9 | 105.023 | 32.600 | 15.9 | 0.00 | 0.00 | 0.00 | 0.00 | 0.00 | 0.00 |
| 0400 | 105.015 | 32.560 | 15.6 | 104.982 | 32.538 | 15.6 | 104.957 | 32.555 | 15.9 | 104.990 | 32.577 | 15.9 | 0.00 | 0.00 | 0.00 | 0.00 | 0.00 | 0.00 |
| 0401 | 104.982 | 32.538 | 15.6 | 104.949 | 32.515 | 15.6 | 104.924 | 32.532 | 15.9 | 104.957 | 32.555 | 15.9 | 0.00 | 0.00 | 0.00 | 0.00 | 0.00 | 0.00 |
| 0402 | 104.949 | 32.515 | 15.6 | 104.916 | 32.492 | 15.6 | 104.891 | 32.509 | 15.9 | 104.924 | 32.532 | 15.9 | 0.00 | 0.00 | 0.00 | 0.00 | 0.00 | 0.00 |
| 0403 | 104.916 | 32.492 | 15.6 | 104.883 | 32.470 | 15.6 | 104.859 | 32.487 | 15.9 | 104.891 | 32.509 | 15.9 | 0.00 | 0.00 | 0.00 | 0.00 | 0.00 | 0.00 |
| 0404 | 104.883 | 32.470 | 15.6 | 104.850 | 32.447 | 15.6 | 104.825 | 32.464 | 15.9 | 104.859 | 32.487 | 15.9 | 0.00 | 0.00 | 0.00 | 0.00 | 0.00 | 0.00 |
| 0405 | 104.850 | 32.447 | 15.6 | 104.817 | 32.424 | 15.6 | 104.792 | 32.441 | 15.9 | 104.825 | 32.464 | 15.9 | 0.00 | 0.00 | 0.00 | 0.00 | 0.00 | 0.00 |



|      |         |        |      |         |        |      |         |        |      |         |        |      |      |      |      |      |      |      |
|------|---------|--------|------|---------|--------|------|---------|--------|------|---------|--------|------|------|------|------|------|------|------|
| 0406 | 104.817 | 32.424 | 15.6 | 104.784 | 32.402 | 15.6 | 104.759 | 32.419 | 15.9 | 104.792 | 32.441 | 15.9 | 0.00 | 0.00 | 0.00 | 0.00 | 0.00 | 0.00 |
| 0407 | 104.784 | 32.402 | 15.6 | 104.751 | 32.379 | 15.6 | 104.726 | 32.396 | 15.9 | 104.759 | 32.419 | 15.9 | 0.00 | 0.00 | 0.00 | 0.00 | 0.00 | 0.00 |
| 0408 | 104.751 | 32.379 | 15.6 | 104.718 | 32.356 | 15.6 | 104.693 | 32.373 | 15.9 | 104.726 | 32.396 | 15.9 | 0.00 | 0.00 | 0.00 | 0.13 | 0.03 | 0.13 |
| 0409 | 104.698 | 32.340 | 15.6 | 104.671 | 32.315 | 15.6 | 104.649 | 32.335 | 15.9 | 104.676 | 32.360 | 15.9 | 0.00 | 1.00 | 1.00 | 0.02 | 0.08 | 0.08 |
| 0410 | 104.671 | 32.315 | 15.6 | 104.643 | 32.290 | 15.6 | 104.622 | 32.310 | 15.9 | 104.649 | 32.335 | 15.9 | 0.00 | 1.00 | 1.00 | 0.09 | 0.00 | 0.09 |
| 0411 | 104.643 | 32.290 | 15.6 | 104.616 | 32.265 | 15.6 | 104.595 | 32.285 | 15.9 | 104.622 | 32.310 | 15.9 | 0.00 | 1.00 | 1.00 | 0.00 | 0.00 | 0.00 |
| 0412 | 104.616 | 32.265 | 15.6 | 104.589 | 32.240 | 15.6 | 104.567 | 32.260 | 15.9 | 104.595 | 32.285 | 15.9 | 0.00 | 1.00 | 1.00 | 0.00 | 0.00 | 0.00 |
| 0413 | 104.589 | 32.240 | 15.6 | 104.562 | 32.215 | 15.6 | 104.540 | 32.235 | 15.9 | 104.567 | 32.260 | 15.9 | 0.00 | 1.00 | 1.00 | 0.00 | 0.01 | 0.01 |
| 0414 | 104.562 | 32.215 | 15.6 | 104.534 | 32.190 | 15.6 | 104.513 | 32.210 | 15.9 | 104.540 | 32.235 | 15.9 | 0.00 | 0.87 | 0.87 | 0.00 | 0.04 | 0.04 |
| 0415 | 104.534 | 32.190 | 15.6 | 104.507 | 32.165 | 15.6 | 104.486 | 32.185 | 15.9 | 104.513 | 32.210 | 15.9 | 0.00 | 0.74 | 0.74 | 0.00 | 0.11 | 0.11 |
| 0416 | 104.507 | 32.165 | 15.6 | 104.480 | 32.140 | 15.6 | 104.459 | 32.160 | 15.9 | 104.486 | 32.185 | 15.9 | 0.00 | 0.85 | 0.85 | 0.00 | 0.13 | 0.13 |
| 0417 | 104.480 | 32.140 | 15.6 | 104.453 | 32.115 | 15.6 | 104.431 | 32.135 | 15.9 | 104.459 | 32.160 | 15.9 | 0.00 | 1.18 | 1.18 | 0.06 | 0.11 | 0.13 |
| 0418 | 104.453 | 32.115 | 15.6 | 104.425 | 32.090 | 15.6 | 104.404 | 32.109 | 15.9 | 104.431 | 32.135 | 15.9 | 0.00 | 1.39 | 1.39 | 0.00 | 0.11 | 0.11 |
| 0419 | 104.425 | 32.090 | 15.6 | 104.398 | 32.065 | 15.6 | 104.377 | 32.084 | 15.9 | 104.404 | 32.109 | 15.9 | 0.00 | 1.11 | 1.11 | 0.04 | 0.09 | 0.10 |
| 0420 | 104.398 | 32.065 | 15.6 | 104.371 | 32.040 | 15.6 | 104.350 | 32.059 | 15.9 | 104.377 | 32.084 | 15.9 | 2.03 | 0.30 | 2.05 | 0.06 | 0.01 | 0.06 |
| 0421 | 105.689 | 33.058 | 15.9 | 105.656 | 33.035 | 15.9 | 105.631 | 33.052 | 16.2 | 105.664 | 33.075 | 16.2 | 1.00 | 0.00 | 1.00 | 0.00 | 0.00 | 0.00 |
| 0422 | 105.656 | 33.035 | 15.9 | 105.622 | 33.013 | 15.9 | 105.598 | 33.030 | 16.2 | 105.631 | 33.052 | 16.2 | 0.00 | 0.00 | 0.00 | 0.12 | 0.01 | 0.12 |
| 0423 | 105.622 | 33.013 | 15.9 | 105.589 | 32.990 | 15.9 | 105.565 | 33.007 | 16.2 | 105.598 | 33.030 | 16.2 | 0.00 | 0.00 | 0.00 | 0.13 | 0.02 | 0.13 |
| 0424 | 105.589 | 32.990 | 15.9 | 105.556 | 32.967 | 15.9 | 105.532 | 32.984 | 16.2 | 105.565 | 33.007 | 16.2 | 0.00 | 0.00 | 0.00 | 0.09 | 0.02 | 0.09 |
| 0425 | 105.556 | 32.967 | 15.9 | 105.523 | 32.945 | 15.9 | 105.499 | 32.962 | 16.2 | 105.532 | 32.984 | 16.2 | 0.00 | 0.00 | 0.00 | 0.07 | 0.01 | 0.07 |
| 0426 | 105.523 | 32.945 | 15.9 | 105.490 | 32.922 | 15.9 | 105.466 | 32.939 | 16.2 | 105.499 | 32.962 | 16.2 | 1.00 | 0.00 | 1.00 | 0.01 | 0.00 | 0.01 |
| 0427 | 105.490 | 32.922 | 15.9 | 105.457 | 32.899 | 15.9 | 105.433 | 32.916 | 16.2 | 105.466 | 32.939 | 16.2 | 0.00 | 0.00 | 0.00 | 0.00 | 0.00 | 0.00 |
| 0428 | 105.457 | 32.899 | 15.9 | 105.424 | 32.877 | 15.9 | 105.400 | 32.894 | 16.2 | 105.433 | 32.916 | 16.2 | 0.00 | 0.00 | 0.00 | 0.00 | 0.00 | 0.00 |
| 0429 | 105.424 | 32.877 | 15.9 | 105.391 | 32.854 | 15.9 | 105.367 | 32.871 | 16.2 | 105.400 | 32.894 | 16.2 | 1.00 | 0.00 | 1.00 | 0.00 | 0.00 | 0.00 |
| 0430 | 105.391 | 32.854 | 15.9 | 105.358 | 32.831 | 15.9 | 105.334 | 32.848 | 16.2 | 105.367 | 32.871 | 16.2 | 0.00 | 0.00 | 0.00 | 0.00 | 0.00 | 0.00 |
| 0431 | 105.358 | 32.831 | 15.9 | 105.325 | 32.808 | 15.9 | 105.301 | 32.825 | 16.2 | 105.334 | 32.848 | 16.2 | 1.00 | 0.00 | 1.00 | 0.00 | 0.00 | 0.00 |
| 0432 | 105.325 | 32.808 | 15.9 | 105.292 | 32.786 | 15.9 | 105.268 | 32.803 | 16.2 | 105.301 | 32.825 | 16.2 | 1.00 | 0.00 | 1.00 | 0.00 | 0.00 | 0.00 |
| 0433 | 105.292 | 32.786 | 15.9 | 105.259 | 32.763 | 15.9 | 105.234 | 32.780 | 16.2 | 105.268 | 32.803 | 16.2 | 1.00 | 0.00 | 1.00 | 0.00 | 0.00 | 0.00 |
| 0434 | 105.259 | 32.763 | 15.9 | 105.226 | 32.740 | 15.9 | 105.201 | 32.757 | 16.2 | 105.234 | 32.780 | 16.2 | 1.00 | 0.00 | 1.00 | 0.00 | 0.00 | 0.00 |
| 0435 | 105.226 | 32.740 | 15.9 | 105.193 | 32.718 | 15.9 | 105.168 | 32.734 | 16.2 | 105.201 | 32.757 | 16.2 | 1.00 | 0.00 | 1.00 | 0.00 | 0.00 | 0.00 |
| 0436 | 105.193 | 32.718 | 15.9 | 105.160 | 32.695 | 15.9 | 105.135 | 32.712 | 16.2 | 105.168 | 32.734 | 16.2 | 1.00 | 0.00 | 1.00 | 0.00 | 0.00 | 0.00 |
| 0437 | 105.160 | 32.695 | 15.9 | 105.127 | 32.672 | 15.9 | 105.103 | 32.689 | 16.2 | 105.135 | 32.712 | 16.2 | 1.00 | 0.00 | 1.00 | 0.00 | 0.00 | 0.00 |
| 0438 | 105.127 | 32.672 | 15.9 | 105.094 | 32.649 | 15.9 | 105.070 | 32.666 | 16.2 | 105.103 | 32.689 | 16.2 | 1.00 | 0.00 | 1.00 | 0.00 | 0.00 | 0.00 |
| 0439 | 105.094 | 32.649 | 15.9 | 105.061 | 32.627 | 15.9 | 105.036 | 32.644 | 16.2 | 105.070 | 32.666 | 16.2 | 1.00 | 0.00 | 1.00 | 0.00 | 0.00 | 0.00 |
| 0440 | 105.061 | 32.627 | 15.9 | 105.028 | 32.604 | 15.9 | 105.003 | 32.621 | 16.2 | 105.036 | 32.644 | 16.2 | 1.00 | 0.00 | 1.00 | 0.05 | 0.00 | 0.05 |
| 0441 | 105.028 | 32.604 | 15.9 | 104.995 | 32.581 | 15.9 | 104.970 | 32.598 | 16.2 | 105.003 | 32.621 | 16.2 | 1.00 | 0.00 | 1.00 | 0.09 | 0.00 | 0.09 |
| 0442 | 104.995 | 32.581 | 15.9 | 104.962 | 32.559 | 15.9 | 104.937 | 32.575 | 16.2 | 104.970 | 32.598 | 16.2 | 1.00 | 0.00 | 1.00 | 0.10 | 0.00 | 0.10 |
| 0443 | 104.962 | 32.559 | 15.9 | 104.929 | 32.536 | 15.9 | 104.904 | 32.553 | 16.2 | 104.937 | 32.575 | 16.2 | 1.00 | 0.00 | 1.00 | 0.10 | 0.00 | 0.10 |
| 0444 | 104.929 | 32.536 | 15.9 | 104.896 | 32.513 | 15.9 | 104.871 | 32.530 | 16.2 | 104.904 | 32.553 | 16.2 | 1.00 | 0.00 | 1.00 | 0.10 | 0.00 | 0.10 |

|      |         |        |      |         |        |      |         |        |      |         |        |      |      |      |      |      |      |      |
|------|---------|--------|------|---------|--------|------|---------|--------|------|---------|--------|------|------|------|------|------|------|------|
| 0445 | 104.896 | 32.513 | 15.9 | 104.863 | 32.490 | 15.9 | 104.838 | 32.507 | 16.2 | 104.871 | 32.530 | 16.2 | 0.71 | 0.00 | 0.71 | 0.12 | 0.00 | 0.12 |
| 0446 | 104.863 | 32.490 | 15.9 | 104.830 | 32.468 | 15.9 | 104.805 | 32.485 | 16.2 | 104.838 | 32.507 | 16.2 | 0.41 | 0.00 | 0.41 | 0.13 | 0.00 | 0.13 |
| 0447 | 104.830 | 32.468 | 15.9 | 104.797 | 32.445 | 15.9 | 104.772 | 32.462 | 16.2 | 104.805 | 32.485 | 16.2 | 0.44 | 0.00 | 0.44 | 0.15 | 0.00 | 0.15 |
| 0448 | 104.797 | 32.445 | 15.9 | 104.764 | 32.422 | 15.9 | 104.739 | 32.439 | 16.2 | 104.772 | 32.462 | 16.2 | 0.76 | 0.00 | 0.76 | 0.12 | 0.00 | 0.12 |
| 0449 | 104.764 | 32.422 | 15.9 | 104.731 | 32.400 | 15.9 | 104.706 | 32.416 | 16.2 | 104.739 | 32.439 | 16.2 | 1.00 | 0.00 | 1.00 | 0.00 | 0.00 | 0.00 |
| 0450 | 104.731 | 32.400 | 15.9 | 104.698 | 32.377 | 15.9 | 104.673 | 32.394 | 16.2 | 104.706 | 32.416 | 16.2 | 1.00 | 0.00 | 1.00 | 0.17 | 0.05 | 0.18 |
| 0451 | 104.675 | 32.358 | 15.9 | 104.647 | 32.333 | 15.9 | 104.626 | 32.353 | 16.2 | 104.653 | 32.378 | 16.2 | 1.00 | 0.89 | 1.34 | 0.10 | 0.12 | 0.16 |
| 0452 | 104.647 | 32.333 | 15.9 | 104.620 | 32.308 | 15.9 | 104.599 | 32.328 | 16.2 | 104.626 | 32.353 | 16.2 | 0.90 | 1.00 | 1.35 | 0.01 | 0.00 | 0.01 |
| 0453 | 104.620 | 32.308 | 15.9 | 104.593 | 32.283 | 15.9 | 104.572 | 32.303 | 16.2 | 104.599 | 32.328 | 16.2 | 0.59 | 1.00 | 1.16 | 0.00 | 0.00 | 0.00 |
| 0454 | 104.593 | 32.283 | 15.9 | 104.566 | 32.258 | 15.9 | 104.544 | 32.278 | 16.2 | 104.572 | 32.303 | 16.2 | 0.67 | 1.00 | 1.20 | 0.00 | 0.03 | 0.03 |
| 0455 | 104.566 | 32.258 | 15.9 | 104.538 | 32.233 | 15.9 | 104.517 | 32.253 | 16.2 | 104.544 | 32.278 | 16.2 | 0.98 | 0.82 | 1.28 | 0.00 | 0.11 | 0.11 |
| 0456 | 104.538 | 32.233 | 15.9 | 104.511 | 32.208 | 15.9 | 104.490 | 32.228 | 16.2 | 104.517 | 32.253 | 16.2 | 1.00 | 0.49 | 1.11 | 0.03 | 0.13 | 0.13 |
| 0457 | 104.511 | 32.208 | 15.9 | 104.484 | 32.183 | 15.9 | 104.463 | 32.203 | 16.2 | 104.490 | 32.228 | 16.2 | 1.81 | 0.33 | 1.84 | 0.00 | 0.13 | 0.13 |
| 0458 | 104.484 | 32.183 | 15.9 | 104.457 | 32.158 | 15.9 | 104.435 | 32.178 | 16.2 | 104.463 | 32.203 | 16.2 | 1.91 | 0.43 | 1.96 | 0.00 | 0.12 | 0.12 |
| 0459 | 104.457 | 32.158 | 15.9 | 104.430 | 32.133 | 15.9 | 104.408 | 32.153 | 16.2 | 104.435 | 32.178 | 16.2 | 1.56 | 0.74 | 1.73 | 0.07 | 0.11 | 0.13 |
| 0460 | 104.430 | 32.133 | 15.9 | 104.402 | 32.108 | 15.9 | 104.381 | 32.128 | 16.2 | 104.408 | 32.153 | 16.2 | 1.15 | 0.99 | 1.51 | 0.00 | 0.12 | 0.12 |
| 0461 | 104.402 | 32.108 | 15.9 | 104.375 | 32.083 | 15.9 | 104.354 | 32.103 | 16.2 | 104.381 | 32.128 | 16.2 | 0.68 | 0.83 | 1.07 | 0.05 | 0.09 | 0.10 |
| 0462 | 104.375 | 32.083 | 15.9 | 104.348 | 32.058 | 15.9 | 104.326 | 32.078 | 16.2 | 104.354 | 32.103 | 16.2 | 0.67 | 0.22 | 0.71 | 0.05 | 0.01 | 0.05 |
| 0463 | 105.668 | 33.079 | 16.2 | 105.635 | 33.056 | 16.2 | 105.611 | 33.073 | 16.5 | 105.644 | 33.096 | 16.5 | 0.82 | 0.00 | 0.82 | 0.06 | 0.00 | 0.06 |
| 0464 | 105.635 | 33.056 | 16.2 | 105.602 | 33.034 | 16.2 | 105.578 | 33.051 | 16.5 | 105.611 | 33.073 | 16.5 | 0.00 | 0.00 | 0.00 | 0.00 | 0.01 | 0.01 |
| 0465 | 105.602 | 33.034 | 16.2 | 105.569 | 33.011 | 16.2 | 105.545 | 33.028 | 16.5 | 105.578 | 33.051 | 16.5 | 0.00 | 0.00 | 0.00 | 0.00 | 0.01 | 0.01 |
| 0466 | 105.569 | 33.011 | 16.2 | 105.536 | 32.988 | 16.2 | 105.512 | 33.005 | 16.5 | 105.545 | 33.028 | 16.5 | 0.00 | 0.00 | 0.00 | 0.00 | 0.01 | 0.01 |
| 0467 | 105.536 | 32.988 | 16.2 | 105.503 | 32.965 | 16.2 | 105.479 | 32.983 | 16.5 | 105.512 | 33.005 | 16.5 | 0.00 | 0.00 | 0.00 | 0.00 | 0.01 | 0.01 |
| 0468 | 105.503 | 32.965 | 16.2 | 105.470 | 32.943 | 16.2 | 105.446 | 32.960 | 16.5 | 105.479 | 32.983 | 16.5 | 1.00 | 0.00 | 1.00 | 0.00 | 0.00 | 0.00 |
| 0469 | 105.470 | 32.943 | 16.2 | 105.437 | 32.920 | 16.2 | 105.413 | 32.937 | 16.5 | 105.446 | 32.960 | 16.5 | 0.00 | 0.00 | 0.00 | 0.06 | 0.00 | 0.06 |
| 0470 | 105.437 | 32.920 | 16.2 | 105.404 | 32.897 | 16.2 | 105.379 | 32.914 | 16.5 | 105.413 | 32.937 | 16.5 | 0.00 | 0.00 | 0.00 | 0.09 | 0.00 | 0.09 |
| 0471 | 105.404 | 32.897 | 16.2 | 105.371 | 32.875 | 16.2 | 105.347 | 32.892 | 16.5 | 105.380 | 32.914 | 16.5 | 1.00 | 0.00 | 1.00 | 0.11 | 0.00 | 0.11 |
| 0472 | 105.371 | 32.875 | 16.2 | 105.338 | 32.852 | 16.2 | 105.314 | 32.869 | 16.5 | 105.347 | 32.892 | 16.5 | 0.00 | 0.00 | 0.00 | 0.10 | 0.00 | 0.10 |
| 0473 | 105.338 | 32.852 | 16.2 | 105.305 | 32.829 | 16.2 | 105.281 | 32.846 | 16.5 | 105.314 | 32.869 | 16.5 | 1.00 | 0.00 | 1.00 | 0.03 | 0.00 | 0.03 |
| 0474 | 105.305 | 32.829 | 16.2 | 105.272 | 32.806 | 16.2 | 105.248 | 32.824 | 16.5 | 105.281 | 32.846 | 16.5 | 1.00 | 0.00 | 1.00 | 0.00 | 0.00 | 0.00 |
| 0475 | 105.272 | 32.806 | 16.2 | 105.239 | 32.784 | 16.2 | 105.214 | 32.801 | 16.5 | 105.248 | 32.824 | 16.5 | 1.00 | 0.00 | 1.00 | 0.00 | 0.00 | 0.00 |
| 0476 | 105.239 | 32.784 | 16.2 | 105.206 | 32.761 | 16.2 | 105.181 | 32.778 | 16.5 | 105.214 | 32.801 | 16.5 | 1.00 | 0.00 | 1.00 | 0.00 | 0.00 | 0.00 |
| 0477 | 105.206 | 32.761 | 16.2 | 105.173 | 32.738 | 16.2 | 105.148 | 32.755 | 16.5 | 105.181 | 32.778 | 16.5 | 1.00 | 0.00 | 1.00 | 0.03 | 0.00 | 0.03 |
| 0478 | 105.173 | 32.738 | 16.2 | 105.140 | 32.716 | 16.2 | 105.115 | 32.733 | 16.5 | 105.148 | 32.755 | 16.5 | 0.85 | 0.00 | 0.85 | 0.09 | 0.00 | 0.09 |
| 0479 | 105.140 | 32.716 | 16.2 | 105.107 | 32.693 | 16.2 | 105.082 | 32.710 | 16.5 | 105.115 | 32.733 | 16.5 | 0.55 | 0.00 | 0.55 | 0.08 | 0.00 | 0.08 |
| 0480 | 105.107 | 32.693 | 16.2 | 105.074 | 32.670 | 16.2 | 105.049 | 32.687 | 16.5 | 105.082 | 32.710 | 16.5 | 0.25 | 0.00 | 0.25 | 0.05 | 0.00 | 0.05 |
| 0481 | 105.074 | 32.670 | 16.2 | 105.041 | 32.648 | 16.2 | 105.016 | 32.664 | 16.5 | 105.049 | 32.687 | 16.5 | 0.00 | 0.00 | 0.00 | 0.00 | 0.00 | 0.00 |
| 0482 | 105.041 | 32.648 | 16.2 | 105.008 | 32.625 | 16.2 | 104.983 | 32.642 | 16.5 | 105.016 | 32.664 | 16.5 | 0.00 | 0.00 | 0.00 | 0.00 | 0.00 | 0.00 |
| 0483 | 105.008 | 32.625 | 16.2 | 104.975 | 32.602 | 16.2 | 104.950 | 32.619 | 16.5 | 104.983 | 32.642 | 16.5 | 0.00 | 0.00 | 0.00 | 0.00 | 0.00 | 0.00 |

|      |         |        |      |         |        |      |         |        |      |         |        |      |      |      |      |      |      |      |
|------|---------|--------|------|---------|--------|------|---------|--------|------|---------|--------|------|------|------|------|------|------|------|
| 0484 | 104.975 | 32.602 | 16.2 | 104.942 | 32.579 | 16.2 | 104.917 | 32.596 | 16.5 | 104.950 | 32.619 | 16.5 | 0.00 | 0.00 | 0.00 | 0.00 | 0.00 | 0.00 |
| 0485 | 104.942 | 32.579 | 16.2 | 104.909 | 32.557 | 16.2 | 104.884 | 32.574 | 16.5 | 104.917 | 32.596 | 16.5 | 0.00 | 0.00 | 0.00 | 0.00 | 0.00 | 0.00 |
| 0486 | 104.909 | 32.557 | 16.2 | 104.876 | 32.534 | 16.2 | 104.851 | 32.551 | 16.5 | 104.884 | 32.574 | 16.5 | 0.00 | 0.00 | 0.00 | 0.00 | 0.00 | 0.00 |
| 0487 | 104.876 | 32.534 | 16.2 | 104.843 | 32.511 | 16.2 | 104.818 | 32.528 | 16.5 | 104.851 | 32.551 | 16.5 | 0.00 | 0.00 | 0.00 | 0.00 | 0.00 | 0.00 |
| 0488 | 104.843 | 32.511 | 16.2 | 104.810 | 32.489 | 16.2 | 104.785 | 32.505 | 16.5 | 104.818 | 32.528 | 16.5 | 0.00 | 0.00 | 0.00 | 0.00 | 0.00 | 0.00 |
| 0489 | 104.810 | 32.489 | 16.2 | 104.777 | 32.466 | 16.2 | 104.752 | 32.483 | 16.5 | 104.785 | 32.505 | 16.5 | 0.00 | 0.00 | 0.00 | 0.00 | 0.00 | 0.00 |
| 0490 | 104.777 | 32.466 | 16.2 | 104.744 | 32.443 | 16.2 | 104.719 | 32.460 | 16.5 | 104.752 | 32.483 | 16.5 | 0.00 | 0.00 | 0.00 | 0.01 | 0.00 | 0.01 |
| 0491 | 104.744 | 32.443 | 16.2 | 104.711 | 32.420 | 16.2 | 104.686 | 32.437 | 16.5 | 104.719 | 32.460 | 16.5 | 0.39 | 0.00 | 0.39 | 0.00 | 0.00 | 0.00 |
| 0492 | 104.711 | 32.420 | 16.2 | 104.678 | 32.398 | 16.2 | 104.653 | 32.414 | 16.5 | 104.686 | 32.437 | 16.5 | 1.00 | 0.00 | 1.00 | 0.14 | 0.00 | 0.14 |
| 0493 | 104.651 | 32.377 | 16.2 | 104.624 | 32.352 | 16.2 | 104.603 | 32.371 | 16.5 | 104.630 | 32.397 | 16.5 | 1.00 | 0.00 | 1.00 | 0.12 | 0.00 | 0.12 |
| 0494 | 104.624 | 32.352 | 16.2 | 104.597 | 32.327 | 16.2 | 104.576 | 32.346 | 16.5 | 104.603 | 32.371 | 16.5 | 0.00 | 0.18 | 0.18 | 0.00 | 0.06 | 0.06 |
| 0495 | 104.597 | 32.327 | 16.2 | 104.570 | 32.302 | 16.2 | 104.548 | 32.321 | 16.5 | 104.576 | 32.346 | 16.5 | 0.00 | 0.41 | 0.41 | 0.00 | 0.13 | 0.13 |
| 0496 | 104.570 | 32.302 | 16.2 | 104.543 | 32.277 | 16.2 | 104.521 | 32.296 | 16.5 | 104.548 | 32.321 | 16.5 | 0.00 | 0.45 | 0.45 | 0.00 | 0.15 | 0.15 |
| 0497 | 104.543 | 32.277 | 16.2 | 104.515 | 32.252 | 16.2 | 104.494 | 32.271 | 16.5 | 104.521 | 32.296 | 16.5 | 0.00 | 0.26 | 0.26 | 0.00 | 0.15 | 0.15 |
| 0498 | 104.515 | 32.252 | 16.2 | 104.488 | 32.227 | 16.2 | 104.467 | 32.246 | 16.5 | 104.494 | 32.271 | 16.5 | 0.00 | 0.04 | 0.04 | 0.12 | 0.10 | 0.16 |
| 0499 | 104.488 | 32.227 | 16.2 | 104.461 | 32.202 | 16.2 | 104.439 | 32.221 | 16.5 | 104.467 | 32.246 | 16.5 | 0.27 | 0.00 | 0.27 | 0.01 | 0.08 | 0.08 |
| 0500 | 104.461 | 32.202 | 16.2 | 104.434 | 32.176 | 16.2 | 104.412 | 32.196 | 16.5 | 104.439 | 32.221 | 16.5 | 0.25 | 0.00 | 0.25 | 0.01 | 0.08 | 0.08 |
| 0501 | 104.434 | 32.176 | 16.2 | 104.406 | 32.151 | 16.2 | 104.385 | 32.171 | 16.5 | 104.412 | 32.196 | 16.5 | 0.01 | 0.14 | 0.14 | 0.08 | 0.11 | 0.14 |
| 0502 | 104.406 | 32.151 | 16.2 | 104.379 | 32.126 | 16.2 | 104.358 | 32.146 | 16.5 | 104.385 | 32.171 | 16.5 | 0.00 | 0.30 | 0.30 | 0.00 | 0.13 | 0.13 |
| 0503 | 104.379 | 32.126 | 16.2 | 104.352 | 32.101 | 16.2 | 104.330 | 32.121 | 16.5 | 104.358 | 32.146 | 16.5 | 0.00 | 0.29 | 0.29 | 0.05 | 0.09 | 0.10 |
| 0504 | 104.352 | 32.101 | 16.2 | 104.325 | 32.076 | 16.2 | 104.303 | 32.096 | 16.5 | 104.330 | 32.121 | 16.5 | 0.00 | 0.06 | 0.06 | 0.00 | 0.01 | 0.01 |
| 0505 | 105.648 | 33.100 | 16.5 | 105.615 | 33.077 | 16.5 | 105.591 | 33.094 | 16.8 | 105.624 | 33.117 | 16.8 | 0.00 | 0.00 | 0.00 | 0.00 | 0.00 | 0.00 |
| 0506 | 105.615 | 33.077 | 16.5 | 105.582 | 33.054 | 16.5 | 105.558 | 33.072 | 16.8 | 105.591 | 33.094 | 16.8 | 0.00 | 0.00 | 0.00 | 0.00 | 0.01 | 0.01 |
| 0507 | 105.582 | 33.054 | 16.5 | 105.549 | 33.032 | 16.5 | 105.525 | 33.049 | 16.8 | 105.558 | 33.072 | 16.8 | 0.00 | 0.00 | 0.00 | 0.00 | 0.01 | 0.01 |
| 0508 | 105.549 | 33.032 | 16.5 | 105.516 | 33.009 | 16.5 | 105.492 | 33.026 | 16.8 | 105.525 | 33.049 | 16.8 | 0.00 | 0.00 | 0.00 | 0.00 | 0.01 | 0.01 |
| 0509 | 105.516 | 33.009 | 16.5 | 105.483 | 32.986 | 16.5 | 105.459 | 33.003 | 16.8 | 105.492 | 33.026 | 16.8 | 0.00 | 0.00 | 0.00 | 0.00 | 0.00 | 0.00 |
| 0510 | 105.483 | 32.986 | 16.5 | 105.450 | 32.964 | 16.5 | 105.425 | 32.981 | 16.8 | 105.459 | 33.003 | 16.8 | 0.82 | 0.00 | 0.82 | 0.00 | 0.00 | 0.00 |
| 0511 | 105.450 | 32.964 | 16.5 | 105.417 | 32.941 | 16.5 | 105.392 | 32.958 | 16.8 | 105.425 | 32.981 | 16.8 | 0.00 | 0.00 | 0.00 | 0.00 | 0.00 | 0.00 |
| 0512 | 105.417 | 32.941 | 16.5 | 105.384 | 32.918 | 16.5 | 105.359 | 32.935 | 16.8 | 105.392 | 32.958 | 16.8 | 0.00 | 0.00 | 0.00 | 0.00 | 0.00 | 0.00 |
| 0513 | 105.384 | 32.918 | 16.5 | 105.351 | 32.895 | 16.5 | 105.326 | 32.913 | 16.8 | 105.359 | 32.935 | 16.8 | 1.00 | 0.00 | 1.00 | 0.06 | 0.00 | 0.06 |
| 0514 | 105.351 | 32.895 | 16.5 | 105.318 | 32.873 | 16.5 | 105.293 | 32.890 | 16.8 | 105.326 | 32.913 | 16.8 | 0.00 | 0.00 | 0.00 | 0.12 | 0.00 | 0.12 |
| 0515 | 105.318 | 32.873 | 16.5 | 105.285 | 32.850 | 16.5 | 105.260 | 32.867 | 16.8 | 105.293 | 32.890 | 16.8 | 1.00 | 0.00 | 1.00 | 0.11 | 0.00 | 0.11 |
| 0516 | 105.285 | 32.850 | 16.5 | 105.252 | 32.827 | 16.5 | 105.227 | 32.844 | 16.8 | 105.260 | 32.867 | 16.8 | 0.87 | 0.00 | 0.87 | 0.10 | 0.00 | 0.10 |
| 0517 | 105.252 | 32.827 | 16.5 | 105.219 | 32.805 | 16.5 | 105.194 | 32.822 | 16.8 | 105.227 | 32.844 | 16.8 | 0.75 | 0.00 | 0.75 | 0.10 | 0.00 | 0.10 |
| 0518 | 105.219 | 32.805 | 16.5 | 105.186 | 32.782 | 16.5 | 105.161 | 32.799 | 16.8 | 105.194 | 32.822 | 16.8 | 0.65 | 0.00 | 0.65 | 0.10 | 0.00 | 0.10 |
| 0519 | 105.186 | 32.782 | 16.5 | 105.153 | 32.759 | 16.5 | 105.128 | 32.776 | 16.8 | 105.161 | 32.799 | 16.8 | 0.48 | 0.00 | 0.48 | 0.10 | 0.00 | 0.10 |
| 0520 | 105.153 | 32.759 | 16.5 | 105.120 | 32.736 | 16.5 | 105.095 | 32.753 | 16.8 | 105.128 | 32.776 | 16.8 | 0.23 | 0.00 | 0.23 | 0.10 | 0.00 | 0.10 |
| 0521 | 105.120 | 32.736 | 16.5 | 105.087 | 32.714 | 16.5 | 105.062 | 32.731 | 16.8 | 105.095 | 32.753 | 16.8 | 0.00 | 0.00 | 0.00 | 0.02 | 0.00 | 0.02 |
| 0522 | 105.087 | 32.714 | 16.5 | 105.054 | 32.691 | 16.5 | 105.029 | 32.708 | 16.8 | 105.062 | 32.731 | 16.8 | 0.00 | 0.00 | 0.00 | 0.00 | 0.00 | 0.00 |

|      |         |        |      |         |        |      |         |        |      |         |        |      |      |       |       |      |      |      |
|------|---------|--------|------|---------|--------|------|---------|--------|------|---------|--------|------|------|-------|-------|------|------|------|
| 0523 | 105.054 | 32.691 | 16.5 | 105.021 | 32.668 | 16.5 | 104.996 | 32.685 | 16.8 | 105.029 | 32.708 | 16.8 | 0.00 | 0.00  | 0.00  | 0.00 | 0.00 | 0.00 |
| 0524 | 105.021 | 32.668 | 16.5 | 104.988 | 32.646 | 16.5 | 104.963 | 32.663 | 16.8 | 104.996 | 32.685 | 16.8 | 0.00 | 0.00  | 0.00  | 0.00 | 0.00 | 0.00 |
| 0525 | 104.988 | 32.646 | 16.5 | 104.955 | 32.623 | 16.5 | 104.930 | 32.640 | 16.8 | 104.963 | 32.663 | 16.8 | 0.00 | 0.00  | 0.00  | 0.00 | 0.00 | 0.00 |
| 0526 | 104.955 | 32.623 | 16.5 | 104.922 | 32.600 | 16.5 | 104.897 | 32.617 | 16.8 | 104.930 | 32.640 | 16.8 | 0.00 | 0.00  | 0.00  | 0.00 | 0.00 | 0.00 |
| 0527 | 104.922 | 32.600 | 16.5 | 104.889 | 32.577 | 16.5 | 104.864 | 32.594 | 16.8 | 104.897 | 32.617 | 16.8 | 0.00 | 0.00  | 0.00  | 0.00 | 0.00 | 0.00 |
| 0528 | 104.889 | 32.577 | 16.5 | 104.856 | 32.555 | 16.5 | 104.831 | 32.572 | 16.8 | 104.864 | 32.594 | 16.8 | 0.00 | 0.00  | 0.00  | 0.00 | 0.00 | 0.00 |
| 0529 | 104.856 | 32.555 | 16.5 | 104.823 | 32.532 | 16.5 | 104.798 | 32.549 | 16.8 | 104.831 | 32.572 | 16.8 | 0.00 | 0.00  | 0.00  | 0.00 | 0.00 | 0.00 |
| 0530 | 104.823 | 32.532 | 16.5 | 104.790 | 32.509 | 16.5 | 104.765 | 32.526 | 16.8 | 104.798 | 32.549 | 16.8 | 0.00 | 0.00  | 0.00  | 0.00 | 0.00 | 0.00 |
| 0531 | 104.790 | 32.509 | 16.5 | 104.757 | 32.487 | 16.5 | 104.732 | 32.504 | 16.8 | 104.765 | 32.526 | 16.8 | 0.00 | 0.00  | 0.00  | 0.00 | 0.00 | 0.00 |
| 0532 | 104.757 | 32.487 | 16.5 | 104.724 | 32.464 | 16.5 | 104.699 | 32.481 | 16.8 | 104.732 | 32.504 | 16.8 | 0.00 | 0.00  | 0.00  | 0.00 | 0.00 | 0.00 |
| 0533 | 104.724 | 32.464 | 16.5 | 104.691 | 32.441 | 16.5 | 104.666 | 32.458 | 16.8 | 104.699 | 32.481 | 16.8 | 0.00 | 0.00  | 0.00  | 0.09 | 0.00 | 0.09 |
| 0534 | 104.691 | 32.441 | 16.5 | 104.658 | 32.418 | 16.5 | 104.633 | 32.435 | 16.8 | 104.666 | 32.458 | 16.8 | 0.68 | 0.00  | 0.68  | 0.00 | 0.00 | 0.00 |
| 0535 | 104.628 | 32.395 | 16.5 | 104.601 | 32.370 | 16.5 | 104.580 | 32.390 | 16.8 | 104.607 | 32.415 | 16.8 | 0.80 | 0.00  | 0.80  | 0.00 | 0.00 | 0.00 |
| 0536 | 104.601 | 32.370 | 16.5 | 104.574 | 32.345 | 16.5 | 104.552 | 32.365 | 16.8 | 104.580 | 32.390 | 16.8 | 0.00 | 0.00  | 0.00  | 0.00 | 0.00 | 0.00 |
| 0537 | 104.574 | 32.345 | 16.5 | 104.547 | 32.320 | 16.5 | 104.525 | 32.340 | 16.8 | 104.552 | 32.365 | 16.8 | 0.00 | 0.00  | 0.00  | 0.00 | 0.00 | 0.00 |
| 0538 | 104.547 | 32.320 | 16.5 | 104.519 | 32.295 | 16.5 | 104.498 | 32.315 | 16.8 | 104.525 | 32.340 | 16.8 | 0.00 | 0.00  | 0.00  | 0.00 | 0.00 | 0.00 |
| 0539 | 104.519 | 32.295 | 16.5 | 104.492 | 32.270 | 16.5 | 104.471 | 32.289 | 16.8 | 104.498 | 32.315 | 16.8 | 0.00 | 0.00  | 0.00  | 0.00 | 0.00 | 0.00 |
| 0540 | 104.492 | 32.270 | 16.5 | 104.465 | 32.245 | 16.5 | 104.443 | 32.264 | 16.8 | 104.471 | 32.289 | 16.8 | 0.00 | 0.00  | 0.00  | 0.14 | 0.00 | 0.14 |
| 0541 | 104.465 | 32.245 | 16.5 | 104.438 | 32.220 | 16.5 | 104.416 | 32.239 | 16.8 | 104.443 | 32.264 | 16.8 | 0.00 | 0.00  | 0.00  | 0.00 | 0.00 | 0.00 |
| 0542 | 104.438 | 32.220 | 16.5 | 104.410 | 32.195 | 16.5 | 104.389 | 32.214 | 16.8 | 104.416 | 32.239 | 16.8 | 0.00 | 0.00  | 0.00  | 0.00 | 0.01 | 0.01 |
| 0543 | 104.410 | 32.195 | 16.5 | 104.383 | 32.170 | 16.5 | 104.362 | 32.189 | 16.8 | 104.389 | 32.214 | 16.8 | 0.00 | 0.00  | 0.00  | 0.06 | 0.07 | 0.09 |
| 0544 | 104.383 | 32.170 | 16.5 | 104.356 | 32.145 | 16.5 | 104.334 | 32.164 | 16.8 | 104.362 | 32.189 | 16.8 | 0.00 | 0.00  | 0.00  | 0.00 | 0.09 | 0.09 |
| 0545 | 104.356 | 32.145 | 16.5 | 104.329 | 32.120 | 16.5 | 104.307 | 32.139 | 16.8 | 104.334 | 32.164 | 16.8 | 0.00 | 0.00  | 0.00  | 0.03 | 0.07 | 0.08 |
| 0546 | 104.329 | 32.120 | 16.5 | 104.302 | 32.094 | 16.5 | 104.280 | 32.114 | 16.8 | 104.307 | 32.139 | 16.8 | 0.00 | 0.00  | 0.00  | 0.00 | 0.00 | 0.00 |
| 0547 | 104.523 | 31.920 | 0.0  | 104.494 | 31.894 | 0.0  | 104.482 | 31.905 | 2.5  | 104.510 | 31.931 | 2.5  | 7.84 | 10.00 | 12.71 | 0.01 | 0.00 | 0.01 |
| 0548 | 104.494 | 31.894 | 0.0  | 104.465 | 31.868 | 0.0  | 104.453 | 31.879 | 2.5  | 104.482 | 31.905 | 2.5  | 5.62 | 10.00 | 11.47 | 0.13 | 0.00 | 0.13 |
| 0549 | 104.465 | 31.868 | 0.0  | 104.436 | 31.842 | 0.0  | 104.424 | 31.853 | 2.5  | 104.453 | 31.879 | 2.5  | 7.95 | 8.28  | 11.48 | 0.13 | 0.04 | 0.14 |
| 0550 | 104.436 | 31.842 | 0.0  | 104.407 | 31.816 | 0.0  | 104.395 | 31.828 | 2.5  | 104.424 | 31.853 | 2.5  | 8.62 | 7.63  | 11.51 | 0.00 | 0.10 | 0.10 |
| 0551 | 104.407 | 31.816 | 0.0  | 104.379 | 31.790 | 0.0  | 104.366 | 31.802 | 2.5  | 104.395 | 31.828 | 2.5  | 9.09 | 8.20  | 12.24 | 0.00 | 0.08 | 0.08 |
| 0552 | 104.379 | 31.790 | 0.0  | 104.350 | 31.765 | 0.0  | 104.337 | 31.776 | 2.5  | 104.366 | 31.802 | 2.5  | 9.98 | 7.16  | 12.28 | 0.08 | 0.09 | 0.12 |
| 0553 | 104.350 | 31.765 | 0.0  | 104.321 | 31.739 | 0.0  | 104.308 | 31.750 | 2.5  | 104.337 | 31.776 | 2.5  | 6.26 | 4.84  | 7.91  | 0.07 | 0.12 | 0.14 |
| 0554 | 104.321 | 31.739 | 0.0  | 104.292 | 31.713 | 0.0  | 104.279 | 31.724 | 2.5  | 104.308 | 31.750 | 2.5  | 0.00 | 1.70  | 1.70  | 0.00 | 0.11 | 0.11 |
| 0555 | 104.292 | 31.713 | 0.0  | 104.263 | 31.687 | 0.0  | 104.251 | 31.698 | 2.5  | 104.279 | 31.724 | 2.5  | 0.00 | 0.00  | 0.00  | 0.00 | 0.03 | 0.03 |
| 0556 | 104.263 | 31.687 | 0.0  | 104.234 | 31.661 | 0.0  | 104.222 | 31.672 | 2.5  | 104.251 | 31.698 | 2.5  | 0.00 | 0.00  | 0.00  | 0.06 | 0.06 | 0.08 |
| 0557 | 104.234 | 31.661 | 0.0  | 104.205 | 31.635 | 0.0  | 104.193 | 31.646 | 2.5  | 104.222 | 31.672 | 2.5  | 3.64 | 2.55  | 4.44  | 0.09 | 0.09 | 0.13 |
| 0558 | 104.205 | 31.635 | 0.0  | 104.176 | 31.609 | 0.0  | 104.164 | 31.620 | 2.5  | 104.193 | 31.646 | 2.5  | 4.07 | 4.24  | 5.87  | 0.05 | 0.05 | 0.07 |
| 0559 | 104.176 | 31.609 | 0.0  | 104.147 | 31.583 | 0.0  | 104.135 | 31.595 | 2.5  | 104.164 | 31.620 | 2.5  | 3.57 | 5.42  | 6.49  | 0.07 | 0.06 | 0.09 |
| 0560 | 104.147 | 31.583 | 0.0  | 104.119 | 31.557 | 0.0  | 104.106 | 31.569 | 2.5  | 104.135 | 31.595 | 2.5  | 1.80 | 6.26  | 6.51  | 0.09 | 0.07 | 0.11 |
| 0561 | 104.119 | 31.557 | 0.0  | 104.090 | 31.532 | 0.0  | 104.077 | 31.543 | 2.5  | 104.106 | 31.569 | 2.5  | 4.46 | 9.41  | 10.41 | 0.14 | 0.05 | 0.15 |

|      |         |        |     |         |        |     |         |        |     |         |        |     |       |       |       |      |      |      |
|------|---------|--------|-----|---------|--------|-----|---------|--------|-----|---------|--------|-----|-------|-------|-------|------|------|------|
| 0562 | 104.090 | 31.532 | 0.0 | 104.061 | 31.506 | 0.0 | 104.048 | 31.517 | 2.5 | 104.077 | 31.543 | 2.5 | 7.97  | 9.49  | 12.40 | 0.14 | 0.10 | 0.17 |
| 0563 | 104.061 | 31.506 | 0.0 | 104.032 | 31.480 | 0.0 | 104.019 | 31.491 | 2.5 | 104.048 | 31.517 | 2.5 | 8.71  | 7.47  | 11.47 | 0.09 | 0.15 | 0.17 |
| 0564 | 104.032 | 31.480 | 0.0 | 104.003 | 31.454 | 0.0 | 103.990 | 31.465 | 2.5 | 104.019 | 31.491 | 2.5 | 6.66  | 4.94  | 8.29  | 0.00 | 0.14 | 0.14 |
| 0565 | 104.003 | 31.454 | 0.0 | 103.974 | 31.428 | 0.0 | 103.962 | 31.439 | 2.5 | 103.990 | 31.465 | 2.5 | 3.28  | 3.49  | 4.79  | 0.08 | 0.19 | 0.21 |
| 0566 | 103.974 | 31.428 | 0.0 | 103.945 | 31.402 | 0.0 | 103.933 | 31.413 | 2.5 | 103.962 | 31.439 | 2.5 | 0.68  | 3.13  | 3.21  | 0.12 | 0.27 | 0.30 |
| 0567 | 103.945 | 31.402 | 0.0 | 103.916 | 31.376 | 0.0 | 103.904 | 31.387 | 2.5 | 103.933 | 31.413 | 2.5 | 0.00  | 3.05  | 3.05  | 0.13 | 0.31 | 0.34 |
| 0568 | 103.916 | 31.376 | 0.0 | 103.888 | 31.350 | 0.0 | 103.875 | 31.361 | 2.5 | 103.904 | 31.387 | 2.5 | 0.00  | 2.62  | 2.62  | 0.06 | 0.27 | 0.28 |
| 0569 | 103.888 | 31.350 | 0.0 | 103.859 | 31.325 | 0.0 | 103.846 | 31.336 | 2.5 | 103.875 | 31.361 | 2.5 | 0.00  | 1.65  | 1.65  | 0.02 | 0.15 | 0.15 |
| 0570 | 103.859 | 31.325 | 0.0 | 103.830 | 31.299 | 0.0 | 103.817 | 31.310 | 2.5 | 103.846 | 31.336 | 2.5 | 0.00  | 0.50  | 0.50  | 0.10 | 0.00 | 0.10 |
| 0571 | 103.830 | 31.299 | 0.0 | 103.801 | 31.273 | 0.0 | 103.788 | 31.284 | 2.5 | 103.817 | 31.310 | 2.5 | 0.00  | 0.04  | 0.04  | 0.14 | 0.05 | 0.15 |
| 0572 | 103.801 | 31.273 | 0.0 | 103.772 | 31.247 | 0.0 | 103.760 | 31.258 | 2.5 | 103.788 | 31.284 | 2.5 | 2.19  | 1.20  | 2.50  | 0.12 | 0.09 | 0.15 |
| 0573 | 103.772 | 31.247 | 0.0 | 103.743 | 31.221 | 0.0 | 103.731 | 31.232 | 2.5 | 103.760 | 31.258 | 2.5 | 6.09  | 4.81  | 7.76  | 0.09 | 0.06 | 0.11 |
| 0574 | 103.743 | 31.221 | 0.0 | 103.714 | 31.195 | 0.0 | 103.702 | 31.206 | 2.5 | 103.731 | 31.232 | 2.5 | 9.61  | 8.77  | 13.01 | 0.05 | 0.00 | 0.05 |
| 0575 | 103.714 | 31.195 | 0.0 | 103.685 | 31.169 | 0.0 | 103.673 | 31.180 | 2.5 | 103.702 | 31.206 | 2.5 | 10.00 | 10.00 | 14.14 | 0.00 | 0.00 | 0.00 |
| 0576 | 103.685 | 31.169 | 0.0 | 103.656 | 31.143 | 0.0 | 103.644 | 31.154 | 2.5 | 103.673 | 31.180 | 2.5 | 10.00 | 10.00 | 14.14 | 0.00 | 0.00 | 0.00 |
| 0577 | 103.656 | 31.143 | 0.0 | 103.628 | 31.117 | 0.0 | 103.615 | 31.128 | 2.5 | 103.644 | 31.154 | 2.5 | 0.00  | 10.00 | 10.00 | 0.00 | 0.00 | 0.00 |
| 0578 | 103.628 | 31.117 | 0.0 | 103.599 | 31.091 | 0.0 | 103.586 | 31.103 | 2.5 | 103.615 | 31.128 | 2.5 | 0.00  | 10.00 | 10.00 | 0.00 | 0.00 | 0.00 |
| 0579 | 103.599 | 31.091 | 0.0 | 103.570 | 31.066 | 0.0 | 103.557 | 31.077 | 2.5 | 103.586 | 31.103 | 2.5 | 0.00  | 10.00 | 10.00 | 0.00 | 0.00 | 0.00 |
| 0580 | 103.570 | 31.066 | 0.0 | 103.541 | 31.040 | 0.0 | 103.528 | 31.051 | 2.5 | 103.557 | 31.077 | 2.5 | 3.40  | 10.00 | 10.56 | 0.10 | 0.00 | 0.10 |
| 0581 | 103.541 | 31.040 | 0.0 | 103.512 | 31.014 | 0.0 | 103.499 | 31.025 | 2.5 | 103.528 | 31.051 | 2.5 | 5.36  | 9.16  | 10.61 | 0.09 | 0.02 | 0.09 |
| 0582 | 103.512 | 31.014 | 0.0 | 103.483 | 30.988 | 0.0 | 103.471 | 30.999 | 2.5 | 103.499 | 31.025 | 2.5 | 0.27  | 4.88  | 4.88  | 0.06 | 0.06 | 0.08 |
| 0583 | 103.483 | 30.988 | 0.0 | 103.454 | 30.962 | 0.0 | 103.442 | 30.973 | 2.5 | 103.471 | 30.999 | 2.5 | 0.00  | 6.39  | 6.39  | 0.00 | 0.10 | 0.10 |
| 0584 | 103.454 | 30.962 | 0.0 | 103.425 | 30.936 | 0.0 | 103.413 | 30.947 | 2.5 | 103.442 | 30.973 | 2.5 | 0.00  | 7.55  | 7.55  | 0.00 | 0.16 | 0.16 |
| 0585 | 103.425 | 30.936 | 0.0 | 103.397 | 30.910 | 0.0 | 103.384 | 30.921 | 2.5 | 103.413 | 30.947 | 2.5 | 0.00  | 6.05  | 6.05  | 0.00 | 0.18 | 0.18 |
| 0586 | 103.397 | 30.910 | 0.0 | 103.368 | 30.884 | 0.0 | 103.355 | 30.895 | 2.5 | 103.384 | 30.921 | 2.5 | 0.00  | 3.44  | 3.44  | 0.00 | 0.20 | 0.20 |
| 0587 | 103.368 | 30.884 | 0.0 | 103.339 | 30.858 | 0.0 | 103.326 | 30.870 | 2.5 | 103.355 | 30.895 | 2.5 | 0.58  | 1.56  | 1.66  | 0.05 | 0.19 | 0.20 |
| 0588 | 103.339 | 30.858 | 0.0 | 103.310 | 30.833 | 0.0 | 103.297 | 30.844 | 2.5 | 103.326 | 30.870 | 2.5 | 0.00  | 0.90  | 0.90  | 0.00 | 0.19 | 0.19 |
| 0589 | 103.310 | 30.833 | 0.0 | 103.281 | 30.807 | 0.0 | 103.269 | 30.818 | 2.5 | 103.297 | 30.844 | 2.5 | 0.00  | 1.05  | 1.05  | 0.00 | 0.21 | 0.21 |
| 0590 | 103.281 | 30.807 | 0.0 | 103.252 | 30.781 | 0.0 | 103.240 | 30.792 | 2.5 | 103.269 | 30.818 | 2.5 | 0.00  | 1.26  | 1.26  | 0.00 | 0.24 | 0.24 |
| 0591 | 103.252 | 30.781 | 0.0 | 103.223 | 30.755 | 0.0 | 103.211 | 30.766 | 2.5 | 103.240 | 30.792 | 2.5 | 0.00  | 1.00  | 1.00  | 0.00 | 0.21 | 0.21 |
| 0592 | 103.223 | 30.755 | 0.0 | 103.194 | 30.729 | 0.0 | 103.182 | 30.740 | 2.5 | 103.211 | 30.766 | 2.5 | 0.00  | 0.58  | 0.58  | 0.00 | 0.26 | 0.26 |
| 0593 | 103.194 | 30.729 | 0.0 | 103.165 | 30.703 | 0.0 | 103.153 | 30.714 | 2.5 | 103.182 | 30.740 | 2.5 | 0.00  | 0.43  | 0.43  | 0.00 | 0.22 | 0.22 |
| 0594 | 103.165 | 30.703 | 0.0 | 103.137 | 30.677 | 0.0 | 103.124 | 30.688 | 2.5 | 103.153 | 30.714 | 2.5 | 1.00  | 1.00  | 1.41  | 0.00 | 0.00 | 0.00 |
| 0595 | 104.510 | 31.931 | 2.5 | 104.481 | 31.905 | 2.5 | 104.468 | 31.916 | 4.8 | 104.497 | 31.942 | 4.8 | 9.43  | 7.16  | 11.84 | 0.05 | 0.06 | 0.08 |
| 0596 | 104.481 | 31.905 | 2.5 | 104.452 | 31.879 | 2.5 | 104.439 | 31.891 | 4.8 | 104.468 | 31.916 | 4.8 | 2.32  | 4.79  | 5.32  | 0.06 | 0.10 | 0.12 |
| 0597 | 104.452 | 31.879 | 2.5 | 104.423 | 31.853 | 2.5 | 104.410 | 31.865 | 4.8 | 104.439 | 31.891 | 4.8 | 3.21  | 4.47  | 5.50  | 0.07 | 0.07 | 0.10 |
| 0598 | 104.423 | 31.853 | 2.5 | 104.394 | 31.827 | 2.5 | 104.381 | 31.839 | 4.8 | 104.410 | 31.865 | 4.8 | 4.74  | 6.58  | 8.11  | 0.06 | 0.07 | 0.09 |
| 0599 | 104.394 | 31.827 | 2.5 | 104.365 | 31.801 | 2.5 | 104.352 | 31.813 | 4.8 | 104.381 | 31.839 | 4.8 | 10.00 | 8.13  | 12.89 | 0.00 | 0.09 | 0.09 |
| 0600 | 104.365 | 31.801 | 2.5 | 104.337 | 31.775 | 2.5 | 104.323 | 31.787 | 4.8 | 104.352 | 31.813 | 4.8 | 8.98  | 7.09  | 11.44 | 0.08 | 0.11 | 0.14 |

|      |         |        |     |         |        |     |         |        |     |         |        |     |       |      |       |      |      |      |
|------|---------|--------|-----|---------|--------|-----|---------|--------|-----|---------|--------|-----|-------|------|-------|------|------|------|
| 0601 | 104.337 | 31.775 | 2.5 | 104.308 | 31.749 | 2.5 | 104.295 | 31.761 | 4.8 | 104.323 | 31.787 | 4.8 | 3.49  | 4.48 | 5.67  | 0.08 | 0.11 | 0.14 |
| 0602 | 104.308 | 31.749 | 2.5 | 104.279 | 31.724 | 2.5 | 104.266 | 31.735 | 4.8 | 104.295 | 31.761 | 4.8 | 0.00  | 1.16 | 1.16  | 0.00 | 0.12 | 0.12 |
| 0603 | 104.279 | 31.724 | 2.5 | 104.250 | 31.698 | 2.5 | 104.237 | 31.709 | 4.8 | 104.266 | 31.735 | 4.8 | 0.00  | 0.00 | 0.00  | 0.00 | 0.05 | 0.05 |
| 0604 | 104.250 | 31.698 | 2.5 | 104.221 | 31.672 | 2.5 | 104.208 | 31.683 | 4.8 | 104.237 | 31.709 | 4.8 | 0.00  | 0.00 | 0.00  | 0.00 | 0.00 | 0.00 |
| 0605 | 104.221 | 31.672 | 2.5 | 104.192 | 31.646 | 2.5 | 104.179 | 31.658 | 4.8 | 104.208 | 31.683 | 4.8 | 0.74  | 1.38 | 1.57  | 0.07 | 0.10 | 0.12 |
| 0606 | 104.192 | 31.646 | 2.5 | 104.163 | 31.620 | 2.5 | 104.150 | 31.632 | 4.8 | 104.179 | 31.658 | 4.8 | 1.27  | 4.71 | 4.88  | 0.09 | 0.15 | 0.17 |
| 0607 | 104.163 | 31.620 | 2.5 | 104.135 | 31.594 | 2.5 | 104.121 | 31.606 | 4.8 | 104.150 | 31.632 | 4.8 | 0.18  | 4.96 | 4.96  | 0.08 | 0.12 | 0.14 |
| 0608 | 104.135 | 31.594 | 2.5 | 104.106 | 31.568 | 2.5 | 104.092 | 31.580 | 4.8 | 104.121 | 31.606 | 4.8 | 0.00  | 6.40 | 6.40  | 0.06 | 0.12 | 0.13 |
| 0609 | 104.106 | 31.568 | 2.5 | 104.077 | 31.542 | 2.5 | 104.064 | 31.554 | 4.8 | 104.092 | 31.580 | 4.8 | 3.66  | 7.88 | 8.69  | 0.10 | 0.12 | 0.16 |
| 0610 | 104.077 | 31.542 | 2.5 | 104.048 | 31.516 | 2.5 | 104.035 | 31.528 | 4.8 | 104.064 | 31.554 | 4.8 | 7.46  | 7.01 | 10.23 | 0.12 | 0.12 | 0.17 |
| 0611 | 104.048 | 31.516 | 2.5 | 104.019 | 31.491 | 2.5 | 104.006 | 31.502 | 4.8 | 104.035 | 31.528 | 4.8 | 8.48  | 4.86 | 9.77  | 0.11 | 0.13 | 0.17 |
| 0612 | 104.019 | 31.491 | 2.5 | 103.990 | 31.465 | 2.5 | 103.977 | 31.476 | 4.8 | 104.006 | 31.502 | 4.8 | 6.44  | 2.82 | 7.03  | 0.09 | 0.11 | 0.14 |
| 0613 | 103.990 | 31.465 | 2.5 | 103.961 | 31.439 | 2.5 | 103.948 | 31.450 | 4.8 | 103.977 | 31.476 | 4.8 | 2.91  | 2.04 | 3.56  | 0.10 | 0.14 | 0.17 |
| 0614 | 103.961 | 31.439 | 2.5 | 103.932 | 31.413 | 2.5 | 103.919 | 31.424 | 4.8 | 103.948 | 31.450 | 4.8 | 0.29  | 2.35 | 2.36  | 0.10 | 0.20 | 0.22 |
| 0615 | 103.932 | 31.413 | 2.5 | 103.903 | 31.387 | 2.5 | 103.890 | 31.399 | 4.8 | 103.919 | 31.424 | 4.8 | 0.00  | 2.80 | 2.80  | 0.12 | 0.24 | 0.27 |
| 0616 | 103.903 | 31.387 | 2.5 | 103.874 | 31.361 | 2.5 | 103.861 | 31.373 | 4.8 | 103.890 | 31.399 | 4.8 | 0.00  | 2.67 | 2.67  | 0.08 | 0.25 | 0.26 |
| 0617 | 103.874 | 31.361 | 2.5 | 103.846 | 31.335 | 2.5 | 103.832 | 31.347 | 4.8 | 103.861 | 31.373 | 4.8 | 0.00  | 1.76 | 1.76  | 0.04 | 0.16 | 0.16 |
| 0618 | 103.846 | 31.335 | 2.5 | 103.817 | 31.309 | 2.5 | 103.804 | 31.321 | 4.8 | 103.832 | 31.347 | 4.8 | 0.00  | 0.53 | 0.53  | 0.00 | 0.00 | 0.00 |
| 0619 | 103.817 | 31.309 | 2.5 | 103.788 | 31.283 | 2.5 | 103.775 | 31.295 | 4.8 | 103.804 | 31.321 | 4.8 | 0.00  | 0.00 | 0.00  | 0.00 | 0.00 | 0.00 |
| 0620 | 103.788 | 31.283 | 2.5 | 103.759 | 31.258 | 2.5 | 103.746 | 31.269 | 4.8 | 103.775 | 31.295 | 4.8 | 1.75  | 0.63 | 1.86  | 0.00 | 0.09 | 0.09 |
| 0621 | 103.759 | 31.258 | 2.5 | 103.730 | 31.232 | 2.5 | 103.717 | 31.243 | 4.8 | 103.746 | 31.269 | 4.8 | 5.36  | 3.90 | 6.63  | 0.09 | 0.10 | 0.13 |
| 0622 | 103.730 | 31.232 | 2.5 | 103.701 | 31.206 | 2.5 | 103.688 | 31.217 | 4.8 | 103.717 | 31.243 | 4.8 | 8.93  | 7.41 | 11.61 | 0.10 | 0.09 | 0.13 |
| 0623 | 103.701 | 31.206 | 2.5 | 103.672 | 31.180 | 2.5 | 103.659 | 31.192 | 4.8 | 103.688 | 31.217 | 4.8 | 10.00 | 7.19 | 12.32 | 0.08 | 0.09 | 0.12 |
| 0624 | 103.672 | 31.180 | 2.5 | 103.644 | 31.154 | 2.5 | 103.630 | 31.166 | 4.8 | 103.659 | 31.192 | 4.8 | 9.38  | 3.29 | 9.95  | 0.00 | 0.11 | 0.11 |
| 0625 | 103.644 | 31.154 | 2.5 | 103.615 | 31.128 | 2.5 | 103.601 | 31.140 | 4.8 | 103.630 | 31.166 | 4.8 | 0.00  | 9.51 | 9.51  | 0.00 | 0.13 | 0.13 |
| 0626 | 103.615 | 31.128 | 2.5 | 103.586 | 31.102 | 2.5 | 103.573 | 31.114 | 4.8 | 103.601 | 31.140 | 4.8 | 0.00  | 7.27 | 7.27  | 0.01 | 0.11 | 0.11 |
| 0627 | 103.586 | 31.102 | 2.5 | 103.557 | 31.076 | 2.5 | 103.544 | 31.088 | 4.8 | 103.573 | 31.114 | 4.8 | 0.74  | 7.41 | 7.44  | 0.10 | 0.10 | 0.14 |
| 0628 | 103.557 | 31.076 | 2.5 | 103.528 | 31.050 | 2.5 | 103.515 | 31.062 | 4.8 | 103.544 | 31.088 | 4.8 | 4.31  | 5.99 | 7.38  | 0.08 | 0.12 | 0.14 |
| 0629 | 103.528 | 31.050 | 2.5 | 103.499 | 31.024 | 2.5 | 103.486 | 31.036 | 4.8 | 103.515 | 31.062 | 4.8 | 6.42  | 3.68 | 7.40  | 0.09 | 0.13 | 0.16 |
| 0630 | 103.499 | 31.024 | 2.5 | 103.470 | 30.999 | 2.5 | 103.457 | 31.010 | 4.8 | 103.486 | 31.036 | 4.8 | 0.00  | 1.32 | 1.32  | 0.00 | 0.12 | 0.12 |
| 0631 | 103.470 | 30.999 | 2.5 | 103.441 | 30.973 | 2.5 | 103.428 | 30.984 | 4.8 | 103.457 | 31.010 | 4.8 | 0.00  | 3.71 | 3.71  | 0.00 | 0.10 | 0.10 |
| 0632 | 103.441 | 30.973 | 2.5 | 103.412 | 30.947 | 2.5 | 103.399 | 30.959 | 4.8 | 103.428 | 30.984 | 4.8 | 0.00  | 5.55 | 5.55  | 0.00 | 0.12 | 0.12 |
| 0633 | 103.412 | 30.947 | 2.5 | 103.383 | 30.921 | 2.5 | 103.370 | 30.933 | 4.8 | 103.399 | 30.959 | 4.8 | 0.00  | 4.44 | 4.44  | 0.00 | 0.14 | 0.14 |
| 0634 | 103.383 | 30.921 | 2.5 | 103.355 | 30.895 | 2.5 | 103.341 | 30.907 | 4.8 | 103.370 | 30.933 | 4.8 | 0.00  | 2.20 | 2.20  | 0.10 | 0.17 | 0.20 |
| 0635 | 103.355 | 30.895 | 2.5 | 103.326 | 30.869 | 2.5 | 103.313 | 30.881 | 4.8 | 103.341 | 30.907 | 4.8 | 0.00  | 0.86 | 0.86  | 0.02 | 0.14 | 0.14 |
| 0636 | 103.326 | 30.869 | 2.5 | 103.297 | 30.843 | 2.5 | 103.284 | 30.855 | 4.8 | 103.313 | 30.881 | 4.8 | 1.42  | 0.77 | 1.62  | 0.00 | 0.16 | 0.16 |
| 0637 | 103.297 | 30.843 | 2.5 | 103.268 | 30.817 | 2.5 | 103.255 | 30.829 | 4.8 | 103.284 | 30.855 | 4.8 | 0.34  | 1.24 | 1.29  | 0.00 | 0.23 | 0.23 |
| 0638 | 103.268 | 30.817 | 2.5 | 103.239 | 30.791 | 2.5 | 103.226 | 30.803 | 4.8 | 103.255 | 30.829 | 4.8 | 0.00  | 1.44 | 1.44  | 0.00 | 0.28 | 0.28 |
| 0639 | 103.239 | 30.791 | 2.5 | 103.210 | 30.766 | 2.5 | 103.197 | 30.777 | 4.8 | 103.226 | 30.803 | 4.8 | 0.30  | 1.00 | 1.04  | 0.00 | 0.23 | 0.23 |

|      |         |        |     |         |        |     |         |        |     |         |        |     |      |      |       |      |      |      |
|------|---------|--------|-----|---------|--------|-----|---------|--------|-----|---------|--------|-----|------|------|-------|------|------|------|
| 0640 | 103.210 | 30.766 | 2.5 | 103.181 | 30.740 | 2.5 | 103.168 | 30.751 | 4.8 | 103.197 | 30.777 | 4.8 | 0.00 | 0.33 | 0.33  | 0.00 | 0.17 | 0.17 |
| 0641 | 103.181 | 30.740 | 2.5 | 103.153 | 30.714 | 2.5 | 103.139 | 30.726 | 4.8 | 103.168 | 30.751 | 4.8 | 0.19 | 0.00 | 0.19  | 0.00 | 0.07 | 0.07 |
| 0642 | 103.153 | 30.714 | 2.5 | 103.124 | 30.688 | 2.5 | 103.110 | 30.700 | 4.8 | 103.139 | 30.726 | 4.8 | 0.00 | 0.00 | 0.00  | 0.00 | 0.00 | 0.00 |
| 0643 | 104.496 | 31.942 | 4.9 | 104.467 | 31.916 | 4.9 | 104.454 | 31.928 | 7.2 | 104.483 | 31.954 | 7.2 | 5.25 | 2.10 | 5.65  | 0.07 | 0.08 | 0.11 |
| 0644 | 104.467 | 31.916 | 4.9 | 104.438 | 31.890 | 4.9 | 104.425 | 31.902 | 7.2 | 104.454 | 31.928 | 7.2 | 0.00 | 0.00 | 0.00  | 0.00 | 0.14 | 0.14 |
| 0645 | 104.438 | 31.890 | 4.9 | 104.410 | 31.864 | 4.9 | 104.396 | 31.876 | 7.2 | 104.425 | 31.902 | 7.2 | 0.00 | 1.08 | 1.08  | 0.00 | 0.12 | 0.12 |
| 0646 | 104.410 | 31.864 | 4.9 | 104.381 | 31.838 | 4.9 | 104.367 | 31.850 | 7.2 | 104.396 | 31.876 | 7.2 | 4.93 | 5.30 | 7.24  | 0.06 | 0.09 | 0.11 |
| 0647 | 104.381 | 31.838 | 4.9 | 104.352 | 31.812 | 4.9 | 104.338 | 31.825 | 7.2 | 104.367 | 31.850 | 7.2 | 9.60 | 7.59 | 12.24 | 0.00 | 0.15 | 0.15 |
| 0648 | 104.352 | 31.812 | 4.9 | 104.323 | 31.787 | 4.9 | 104.309 | 31.799 | 7.2 | 104.338 | 31.825 | 7.2 | 7.91 | 6.08 | 9.98  | 0.08 | 0.17 | 0.19 |
| 0649 | 104.323 | 31.787 | 4.9 | 104.294 | 31.761 | 4.9 | 104.281 | 31.773 | 7.2 | 104.309 | 31.799 | 7.2 | 2.29 | 2.71 | 3.55  | 0.10 | 0.12 | 0.16 |
| 0650 | 104.294 | 31.761 | 4.9 | 104.265 | 31.735 | 4.9 | 104.252 | 31.747 | 7.2 | 104.281 | 31.773 | 7.2 | 0.00 | 0.03 | 0.03  | 0.00 | 0.08 | 0.08 |
| 0651 | 104.265 | 31.735 | 4.9 | 104.236 | 31.709 | 4.9 | 104.223 | 31.721 | 7.2 | 104.252 | 31.747 | 7.2 | 0.00 | 0.00 | 0.00  | 0.00 | 0.00 | 0.00 |
| 0652 | 104.236 | 31.709 | 4.9 | 104.207 | 31.683 | 4.9 | 104.194 | 31.695 | 7.2 | 104.223 | 31.721 | 7.2 | 0.00 | 0.00 | 0.00  | 0.00 | 0.07 | 0.07 |
| 0653 | 104.207 | 31.683 | 4.9 | 104.178 | 31.657 | 4.9 | 104.165 | 31.669 | 7.2 | 104.194 | 31.695 | 7.2 | 0.00 | 1.30 | 1.30  | 0.05 | 0.13 | 0.14 |
| 0654 | 104.178 | 31.657 | 4.9 | 104.150 | 31.631 | 4.9 | 104.136 | 31.643 | 7.2 | 104.165 | 31.669 | 7.2 | 0.00 | 3.52 | 3.52  | 0.08 | 0.17 | 0.19 |
| 0655 | 104.150 | 31.631 | 4.9 | 104.121 | 31.605 | 4.9 | 104.107 | 31.617 | 7.2 | 104.136 | 31.643 | 7.2 | 0.00 | 4.22 | 4.22  | 0.08 | 0.15 | 0.17 |
| 0656 | 104.121 | 31.605 | 4.9 | 104.092 | 31.579 | 4.9 | 104.078 | 31.591 | 7.2 | 104.107 | 31.617 | 7.2 | 0.00 | 4.43 | 4.43  | 0.08 | 0.14 | 0.16 |
| 0657 | 104.092 | 31.579 | 4.9 | 104.063 | 31.553 | 4.9 | 104.049 | 31.566 | 7.2 | 104.078 | 31.591 | 7.2 | 2.64 | 4.05 | 4.84  | 0.08 | 0.16 | 0.18 |
| 0658 | 104.063 | 31.553 | 4.9 | 104.034 | 31.528 | 4.9 | 104.021 | 31.540 | 7.2 | 104.049 | 31.566 | 7.2 | 5.92 | 2.76 | 6.53  | 0.09 | 0.15 | 0.17 |
| 0659 | 104.034 | 31.528 | 4.9 | 104.005 | 31.502 | 4.9 | 103.992 | 31.514 | 7.2 | 104.021 | 31.540 | 7.2 | 7.18 | 1.38 | 7.31  | 0.12 | 0.11 | 0.16 |
| 0660 | 104.005 | 31.502 | 4.9 | 103.976 | 31.476 | 4.9 | 103.963 | 31.488 | 7.2 | 103.992 | 31.514 | 7.2 | 5.79 | 0.54 | 5.82  | 0.10 | 0.11 | 0.15 |
| 0661 | 103.976 | 31.476 | 4.9 | 103.948 | 31.450 | 4.9 | 103.934 | 31.462 | 7.2 | 103.963 | 31.488 | 7.2 | 2.96 | 0.60 | 3.02  | 0.07 | 0.16 | 0.17 |
| 0662 | 103.948 | 31.450 | 4.9 | 103.919 | 31.424 | 4.9 | 103.905 | 31.436 | 7.2 | 103.934 | 31.462 | 7.2 | 0.64 | 2.53 | 2.61  | 0.00 | 0.19 | 0.19 |
| 0663 | 103.919 | 31.424 | 4.9 | 103.890 | 31.398 | 4.9 | 103.876 | 31.410 | 7.2 | 103.905 | 31.436 | 7.2 | 0.00 | 2.47 | 2.47  | 0.00 | 0.22 | 0.22 |
| 0664 | 103.890 | 31.398 | 4.9 | 103.861 | 31.372 | 4.9 | 103.847 | 31.384 | 7.2 | 103.876 | 31.410 | 7.2 | 0.00 | 2.67 | 2.67  | 0.00 | 0.25 | 0.25 |
| 0665 | 103.861 | 31.372 | 4.9 | 103.832 | 31.346 | 4.9 | 103.818 | 31.358 | 7.2 | 103.847 | 31.384 | 7.2 | 0.00 | 1.91 | 1.91  | 0.00 | 0.20 | 0.20 |
| 0666 | 103.832 | 31.346 | 4.9 | 103.803 | 31.320 | 4.9 | 103.790 | 31.332 | 7.2 | 103.818 | 31.358 | 7.2 | 0.26 | 0.69 | 0.74  | 0.05 | 0.07 | 0.09 |
| 0667 | 103.803 | 31.320 | 4.9 | 103.774 | 31.295 | 4.9 | 103.761 | 31.307 | 7.2 | 103.790 | 31.332 | 7.2 | 0.76 | 0.00 | 0.76  | 0.07 | 0.00 | 0.07 |
| 0668 | 103.774 | 31.295 | 4.9 | 103.745 | 31.269 | 4.9 | 103.732 | 31.281 | 7.2 | 103.761 | 31.307 | 7.2 | 1.91 | 0.30 | 1.93  | 0.09 | 0.07 | 0.11 |
| 0669 | 103.745 | 31.269 | 4.9 | 103.716 | 31.243 | 4.9 | 103.703 | 31.255 | 7.2 | 103.732 | 31.281 | 7.2 | 3.94 | 3.05 | 4.99  | 0.13 | 0.13 | 0.18 |
| 0670 | 103.716 | 31.243 | 4.9 | 103.688 | 31.217 | 4.9 | 103.674 | 31.229 | 7.2 | 103.703 | 31.255 | 7.2 | 5.75 | 6.81 | 8.91  | 0.16 | 0.13 | 0.21 |
| 0671 | 103.688 | 31.217 | 4.9 | 103.659 | 31.191 | 4.9 | 103.645 | 31.203 | 7.2 | 103.674 | 31.229 | 7.2 | 5.70 | 8.79 | 10.48 | 0.18 | 0.09 | 0.20 |
| 0672 | 103.659 | 31.191 | 4.9 | 103.630 | 31.165 | 4.9 | 103.616 | 31.177 | 7.2 | 103.645 | 31.203 | 7.2 | 1.67 | 8.39 | 8.55  | 0.14 | 0.07 | 0.16 |
| 0673 | 103.630 | 31.165 | 4.9 | 103.601 | 31.139 | 4.9 | 103.587 | 31.151 | 7.2 | 103.616 | 31.177 | 7.2 | 0.00 | 8.51 | 8.51  | 0.12 | 0.00 | 0.12 |
| 0674 | 103.601 | 31.139 | 4.9 | 103.572 | 31.113 | 4.9 | 103.558 | 31.125 | 7.2 | 103.587 | 31.151 | 7.2 | 0.00 | 8.13 | 8.13  | 0.11 | 0.02 | 0.11 |
| 0675 | 103.572 | 31.113 | 4.9 | 103.543 | 31.087 | 4.9 | 103.530 | 31.099 | 7.2 | 103.558 | 31.125 | 7.2 | 0.00 | 5.64 | 5.64  | 0.13 | 0.10 | 0.16 |
| 0676 | 103.543 | 31.087 | 4.9 | 103.514 | 31.062 | 4.9 | 103.501 | 31.073 | 7.2 | 103.530 | 31.099 | 7.2 | 0.00 | 2.43 | 2.43  | 0.10 | 0.12 | 0.16 |
| 0677 | 103.514 | 31.062 | 4.9 | 103.485 | 31.036 | 4.9 | 103.472 | 31.048 | 7.2 | 103.501 | 31.073 | 7.2 | 0.00 | 0.00 | 0.00  | 0.08 | 0.04 | 0.09 |
| 0678 | 103.485 | 31.036 | 4.9 | 103.457 | 31.010 | 4.9 | 103.443 | 31.022 | 7.2 | 103.472 | 31.048 | 7.2 | 0.41 | 0.00 | 0.41  | 0.00 | 0.00 | 0.00 |



|      |         |        |     |         |        |     |         |        |     |         |        |     |      |      |       |      |      |      |
|------|---------|--------|-----|---------|--------|-----|---------|--------|-----|---------|--------|-----|------|------|-------|------|------|------|
| 0679 | 103.457 | 31.010 | 4.9 | 103.428 | 30.984 | 4.9 | 103.414 | 30.996 | 7.2 | 103.443 | 31.022 | 7.2 | 0.32 | 1.60 | 1.63  | 0.00 | 0.09 | 0.09 |
| 0680 | 103.428 | 30.984 | 4.9 | 103.399 | 30.958 | 4.9 | 103.385 | 30.970 | 7.2 | 103.414 | 30.996 | 7.2 | 1.10 | 2.89 | 3.09  | 0.00 | 0.08 | 0.08 |
| 0681 | 103.399 | 30.958 | 4.9 | 103.370 | 30.932 | 4.9 | 103.356 | 30.944 | 7.2 | 103.385 | 30.970 | 7.2 | 1.80 | 2.11 | 2.77  | 0.10 | 0.10 | 0.14 |
| 0682 | 103.370 | 30.932 | 4.9 | 103.341 | 30.906 | 4.9 | 103.328 | 30.918 | 7.2 | 103.356 | 30.944 | 7.2 | 0.00 | 2.68 | 2.68  | 0.19 | 0.08 | 0.21 |
| 0683 | 103.341 | 30.906 | 4.9 | 103.312 | 30.880 | 4.9 | 103.299 | 30.892 | 7.2 | 103.328 | 30.918 | 7.2 | 0.25 | 0.14 | 0.26  | 0.19 | 0.00 | 0.19 |
| 0684 | 103.312 | 30.880 | 4.9 | 103.283 | 30.855 | 4.9 | 103.270 | 30.866 | 7.2 | 103.299 | 30.892 | 7.2 | 1.49 | 0.37 | 1.54  | 0.15 | 0.09 | 0.17 |
| 0685 | 103.283 | 30.855 | 4.9 | 103.254 | 30.829 | 4.9 | 103.241 | 30.840 | 7.2 | 103.270 | 30.866 | 7.2 | 0.13 | 0.81 | 0.82  | 0.02 | 0.17 | 0.17 |
| 0686 | 103.254 | 30.829 | 4.9 | 103.225 | 30.803 | 4.9 | 103.212 | 30.815 | 7.2 | 103.241 | 30.840 | 7.2 | 0.00 | 0.90 | 0.90  | 0.00 | 0.22 | 0.22 |
| 0687 | 103.225 | 30.803 | 4.9 | 103.197 | 30.777 | 4.9 | 103.183 | 30.789 | 7.2 | 103.212 | 30.815 | 7.2 | 0.00 | 0.52 | 0.52  | 0.00 | 0.16 | 0.16 |
| 0688 | 103.197 | 30.777 | 4.9 | 103.168 | 30.751 | 4.9 | 103.154 | 30.763 | 7.2 | 103.183 | 30.789 | 7.2 | 0.00 | 0.05 | 0.05  | 0.00 | 0.04 | 0.04 |
| 0689 | 103.168 | 30.751 | 4.9 | 103.139 | 30.725 | 4.9 | 103.125 | 30.737 | 7.2 | 103.154 | 30.763 | 7.2 | 0.00 | 0.00 | 0.00  | 0.00 | 0.00 | 0.00 |
| 0690 | 103.139 | 30.725 | 4.9 | 103.110 | 30.699 | 4.9 | 103.096 | 30.711 | 7.2 | 103.125 | 30.737 | 7.2 | 0.00 | 0.00 | 0.00  | 0.06 | 0.00 | 0.06 |
| 0691 | 104.482 | 31.953 | 7.2 | 104.453 | 31.928 | 7.2 | 104.439 | 31.940 | 9.6 | 104.468 | 31.966 | 9.6 | 2.65 | 1.06 | 2.86  | 0.08 | 0.09 | 0.12 |
| 0692 | 104.453 | 31.928 | 7.2 | 104.424 | 31.902 | 7.2 | 104.411 | 31.914 | 9.6 | 104.439 | 31.940 | 9.6 | 0.00 | 0.00 | 0.00  | 0.00 | 0.14 | 0.14 |
| 0693 | 104.424 | 31.902 | 7.2 | 104.395 | 31.876 | 7.2 | 104.382 | 31.888 | 9.6 | 104.411 | 31.914 | 9.6 | 0.03 | 1.97 | 1.97  | 0.05 | 0.13 | 0.14 |
| 0694 | 104.395 | 31.876 | 7.2 | 104.367 | 31.850 | 7.2 | 104.353 | 31.862 | 9.6 | 104.382 | 31.888 | 9.6 | 3.83 | 6.09 | 7.19  | 0.08 | 0.13 | 0.15 |
| 0695 | 104.367 | 31.850 | 7.2 | 104.338 | 31.824 | 7.2 | 104.324 | 31.836 | 9.6 | 104.353 | 31.862 | 9.6 | 7.38 | 7.60 | 10.59 | 0.09 | 0.18 | 0.20 |
| 0696 | 104.338 | 31.824 | 7.2 | 104.309 | 31.798 | 7.2 | 104.295 | 31.810 | 9.6 | 104.324 | 31.836 | 9.6 | 6.24 | 5.09 | 8.06  | 0.10 | 0.18 | 0.21 |
| 0697 | 104.309 | 31.798 | 7.2 | 104.280 | 31.772 | 7.2 | 104.266 | 31.785 | 9.6 | 104.295 | 31.810 | 9.6 | 2.15 | 1.41 | 2.57  | 0.08 | 0.09 | 0.12 |
| 0698 | 104.280 | 31.772 | 7.2 | 104.251 | 31.746 | 7.2 | 104.237 | 31.759 | 9.6 | 104.266 | 31.785 | 9.6 | 0.00 | 0.00 | 0.00  | 0.00 | 0.00 | 0.00 |
| 0699 | 104.251 | 31.746 | 7.2 | 104.222 | 31.720 | 7.2 | 104.209 | 31.733 | 9.6 | 104.237 | 31.759 | 9.6 | 0.00 | 0.00 | 0.00  | 0.00 | 0.07 | 0.07 |
| 0700 | 104.222 | 31.720 | 7.2 | 104.193 | 31.695 | 7.2 | 104.180 | 31.707 | 9.6 | 104.209 | 31.733 | 9.6 | 0.00 | 1.28 | 1.28  | 0.00 | 0.14 | 0.14 |
| 0701 | 104.193 | 31.695 | 7.2 | 104.165 | 31.669 | 7.2 | 104.151 | 31.681 | 9.6 | 104.180 | 31.707 | 9.6 | 0.23 | 2.80 | 2.81  | 0.04 | 0.16 | 0.16 |
| 0702 | 104.165 | 31.669 | 7.2 | 104.136 | 31.643 | 7.2 | 104.122 | 31.655 | 9.6 | 104.151 | 31.681 | 9.6 | 0.33 | 3.62 | 3.63  | 0.00 | 0.15 | 0.15 |
| 0703 | 104.136 | 31.643 | 7.2 | 104.107 | 31.617 | 7.2 | 104.093 | 31.629 | 9.6 | 104.122 | 31.655 | 9.6 | 0.31 | 3.22 | 3.23  | 0.00 | 0.14 | 0.14 |
| 0704 | 104.107 | 31.617 | 7.2 | 104.078 | 31.591 | 7.2 | 104.064 | 31.603 | 9.6 | 104.093 | 31.629 | 9.6 | 0.69 | 2.23 | 2.34  | 0.00 | 0.16 | 0.16 |
| 0705 | 104.078 | 31.591 | 7.2 | 104.049 | 31.565 | 7.2 | 104.035 | 31.577 | 9.6 | 104.064 | 31.603 | 9.6 | 2.44 | 1.12 | 2.69  | 0.00 | 0.16 | 0.16 |
| 0706 | 104.049 | 31.565 | 7.2 | 104.020 | 31.539 | 7.2 | 104.006 | 31.551 | 9.6 | 104.035 | 31.577 | 9.6 | 4.54 | 0.30 | 4.55  | 0.00 | 0.09 | 0.09 |
| 0707 | 104.020 | 31.539 | 7.2 | 103.991 | 31.513 | 7.2 | 103.977 | 31.526 | 9.6 | 104.006 | 31.551 | 9.6 | 5.52 | 0.00 | 5.52  | 0.07 | 0.00 | 0.07 |
| 0708 | 103.991 | 31.513 | 7.2 | 103.962 | 31.487 | 7.2 | 103.948 | 31.500 | 9.6 | 103.977 | 31.526 | 9.6 | 4.95 | 0.00 | 4.95  | 0.00 | 0.00 | 0.00 |
| 0709 | 103.962 | 31.487 | 7.2 | 103.933 | 31.462 | 7.2 | 103.920 | 31.474 | 9.6 | 103.948 | 31.500 | 9.6 | 3.44 | 0.23 | 3.45  | 0.00 | 0.16 | 0.16 |
| 0710 | 103.933 | 31.462 | 7.2 | 103.904 | 31.436 | 7.2 | 103.891 | 31.448 | 9.6 | 103.920 | 31.474 | 9.6 | 2.07 | 1.21 | 2.39  | 0.00 | 0.25 | 0.25 |
| 0711 | 103.904 | 31.436 | 7.2 | 103.876 | 31.410 | 7.2 | 103.862 | 31.422 | 9.6 | 103.891 | 31.448 | 9.6 | 1.48 | 2.22 | 2.67  | 0.00 | 0.30 | 0.30 |
| 0712 | 103.876 | 31.410 | 7.2 | 103.847 | 31.384 | 7.2 | 103.833 | 31.396 | 9.6 | 103.862 | 31.422 | 9.6 | 1.44 | 2.52 | 2.90  | 0.00 | 0.32 | 0.32 |
| 0713 | 103.847 | 31.384 | 7.2 | 103.818 | 31.358 | 7.2 | 103.804 | 31.370 | 9.6 | 103.833 | 31.396 | 9.6 | 0.60 | 1.89 | 1.98  | 0.00 | 0.26 | 0.26 |
| 0714 | 103.818 | 31.358 | 7.2 | 103.789 | 31.332 | 7.2 | 103.775 | 31.344 | 9.6 | 103.804 | 31.370 | 9.6 | 0.00 | 0.77 | 0.77  | 0.00 | 0.12 | 0.12 |
| 0715 | 103.789 | 31.332 | 7.2 | 103.760 | 31.306 | 7.2 | 103.746 | 31.318 | 9.6 | 103.775 | 31.344 | 9.6 | 0.00 | 0.00 | 0.00  | 0.00 | 0.00 | 0.00 |
| 0716 | 103.760 | 31.306 | 7.2 | 103.731 | 31.280 | 7.2 | 103.718 | 31.292 | 9.6 | 103.746 | 31.318 | 9.6 | 0.00 | 0.10 | 0.10  | 0.00 | 0.02 | 0.02 |
| 0717 | 103.731 | 31.280 | 7.2 | 103.702 | 31.254 | 7.2 | 103.689 | 31.267 | 9.6 | 103.718 | 31.292 | 9.6 | 0.00 | 2.27 | 2.27  | 0.03 | 0.14 | 0.14 |

|      |         |        |     |         |        |     |         |        |      |         |        |      |      |       |       |      |      |      |
|------|---------|--------|-----|---------|--------|-----|---------|--------|------|---------|--------|------|------|-------|-------|------|------|------|
| 0718 | 103.702 | 31.254 | 7.2 | 103.674 | 31.228 | 7.2 | 103.660 | 31.241 | 9.6  | 103.689 | 31.267 | 9.6  | 0.00 | 6.05  | 6.05  | 0.05 | 0.21 | 0.22 |
| 0719 | 103.674 | 31.228 | 7.2 | 103.645 | 31.203 | 7.2 | 103.631 | 31.215 | 9.6  | 103.660 | 31.241 | 9.6  | 0.00 | 9.27  | 9.27  | 0.11 | 0.15 | 0.19 |
| 0720 | 103.645 | 31.203 | 7.2 | 103.616 | 31.177 | 7.2 | 103.602 | 31.189 | 9.6  | 103.631 | 31.215 | 9.6  | 0.00 | 10.00 | 10.00 | 0.07 | 0.00 | 0.07 |
| 0721 | 103.616 | 31.177 | 7.2 | 103.587 | 31.151 | 7.2 | 103.573 | 31.163 | 9.6  | 103.602 | 31.189 | 9.6  | 0.00 | 10.00 | 10.00 | 0.00 | 0.00 | 0.00 |
| 0722 | 103.587 | 31.151 | 7.2 | 103.558 | 31.125 | 7.2 | 103.544 | 31.137 | 9.6  | 103.573 | 31.163 | 9.6  | 0.00 | 8.88  | 8.88  | 0.00 | 0.01 | 0.01 |
| 0723 | 103.558 | 31.125 | 7.2 | 103.529 | 31.099 | 7.2 | 103.515 | 31.111 | 9.6  | 103.544 | 31.137 | 9.6  | 0.00 | 5.61  | 5.61  | 0.00 | 0.12 | 0.12 |
| 0724 | 103.529 | 31.099 | 7.2 | 103.500 | 31.073 | 7.2 | 103.486 | 31.085 | 9.6  | 103.515 | 31.111 | 9.6  | 0.00 | 2.27  | 2.27  | 0.00 | 0.13 | 0.13 |
| 0725 | 103.500 | 31.073 | 7.2 | 103.471 | 31.047 | 7.2 | 103.457 | 31.059 | 9.6  | 103.486 | 31.085 | 9.6  | 0.00 | 0.47  | 0.47  | 0.00 | 0.10 | 0.10 |
| 0726 | 103.471 | 31.047 | 7.2 | 103.442 | 31.021 | 7.2 | 103.429 | 31.034 | 9.6  | 103.457 | 31.059 | 9.6  | 0.00 | 0.75  | 0.75  | 0.00 | 0.07 | 0.07 |
| 0727 | 103.442 | 31.021 | 7.2 | 103.414 | 30.995 | 7.2 | 103.400 | 31.008 | 9.6  | 103.429 | 31.033 | 9.6  | 0.00 | 1.65  | 1.65  | 0.00 | 0.08 | 0.08 |
| 0728 | 103.414 | 30.995 | 7.2 | 103.385 | 30.970 | 7.2 | 103.371 | 30.982 | 9.6  | 103.400 | 31.008 | 9.6  | 0.00 | 1.81  | 1.81  | 0.00 | 0.09 | 0.09 |
| 0729 | 103.385 | 30.970 | 7.2 | 103.356 | 30.944 | 7.2 | 103.342 | 30.956 | 9.6  | 103.371 | 30.982 | 9.6  | 0.00 | 0.89  | 0.89  | 0.00 | 0.09 | 0.09 |
| 0730 | 103.356 | 30.944 | 7.2 | 103.327 | 30.918 | 7.2 | 103.313 | 30.930 | 9.6  | 103.342 | 30.956 | 9.6  | 0.00 | 0.02  | 0.02  | 0.00 | 0.00 | 0.00 |
| 0731 | 103.327 | 30.918 | 7.2 | 103.298 | 30.892 | 7.2 | 103.284 | 30.904 | 9.6  | 103.313 | 30.930 | 9.6  | 0.00 | 0.00  | 0.00  | 0.00 | 0.00 | 0.00 |
| 0732 | 103.298 | 30.892 | 7.2 | 103.269 | 30.866 | 7.2 | 103.255 | 30.878 | 9.6  | 103.284 | 30.904 | 9.6  | 0.00 | 0.00  | 0.00  | 0.00 | 0.00 | 0.00 |
| 0733 | 103.269 | 30.866 | 7.2 | 103.240 | 30.840 | 7.2 | 103.227 | 30.852 | 9.6  | 103.255 | 30.878 | 9.6  | 0.00 | 0.02  | 0.02  | 0.00 | 0.03 | 0.03 |
| 0734 | 103.240 | 30.840 | 7.2 | 103.211 | 30.814 | 7.2 | 103.198 | 30.826 | 9.6  | 103.227 | 30.852 | 9.6  | 0.00 | 0.00  | 0.00  | 0.00 | 0.03 | 0.03 |
| 0735 | 103.211 | 30.814 | 7.2 | 103.183 | 30.788 | 7.2 | 103.169 | 30.800 | 9.6  | 103.198 | 30.826 | 9.6  | 0.00 | 0.00  | 0.00  | 0.00 | 0.00 | 0.00 |
| 0736 | 103.183 | 30.788 | 7.2 | 103.154 | 30.762 | 7.2 | 103.140 | 30.774 | 9.6  | 103.169 | 30.800 | 9.6  | 0.00 | 0.00  | 0.00  | 0.00 | 0.00 | 0.00 |
| 0737 | 103.154 | 30.762 | 7.2 | 103.125 | 30.736 | 7.2 | 103.111 | 30.749 | 9.6  | 103.140 | 30.774 | 9.6  | 0.00 | 0.00  | 0.00  | 0.00 | 0.00 | 0.00 |
| 0738 | 103.125 | 30.736 | 7.2 | 103.096 | 30.710 | 7.2 | 103.082 | 30.723 | 9.6  | 103.111 | 30.749 | 9.6  | 0.00 | 0.00  | 0.00  | 0.00 | 0.00 | 0.00 |
| 0739 | 104.468 | 31.965 | 9.6 | 104.439 | 31.939 | 9.6 | 104.424 | 31.953 | 11.8 | 104.453 | 31.978 | 11.8 | 0.39 | 1.18  | 1.24  | 0.07 | 0.10 | 0.12 |
| 0740 | 104.439 | 31.939 | 9.6 | 104.410 | 31.913 | 9.6 | 104.395 | 31.927 | 11.8 | 104.424 | 31.953 | 11.8 | 0.00 | 1.17  | 1.17  | 0.00 | 0.14 | 0.14 |
| 0741 | 104.410 | 31.913 | 9.6 | 104.381 | 31.888 | 9.6 | 104.367 | 31.901 | 11.8 | 104.395 | 31.927 | 11.8 | 0.00 | 2.92  | 2.92  | 0.00 | 0.14 | 0.14 |
| 0742 | 104.381 | 31.888 | 9.6 | 104.352 | 31.862 | 9.6 | 104.338 | 31.875 | 11.8 | 104.367 | 31.901 | 11.8 | 0.00 | 5.69  | 5.69  | 0.01 | 0.14 | 0.14 |
| 0743 | 104.352 | 31.862 | 9.6 | 104.323 | 31.836 | 9.6 | 104.309 | 31.849 | 11.8 | 104.338 | 31.875 | 11.8 | 0.67 | 6.12  | 6.16  | 0.06 | 0.17 | 0.18 |
| 0744 | 104.323 | 31.836 | 9.6 | 104.294 | 31.810 | 9.6 | 104.280 | 31.823 | 11.8 | 104.309 | 31.849 | 11.8 | 0.40 | 3.43  | 3.45  | 0.06 | 0.14 | 0.15 |
| 0745 | 104.294 | 31.810 | 9.6 | 104.266 | 31.784 | 9.6 | 104.251 | 31.797 | 11.8 | 104.280 | 31.823 | 11.8 | 0.00 | 0.46  | 0.46  | 0.00 | 0.03 | 0.03 |
| 0746 | 104.266 | 31.784 | 9.6 | 104.237 | 31.758 | 9.6 | 104.222 | 31.771 | 11.8 | 104.251 | 31.797 | 11.8 | 0.00 | 0.00  | 0.00  | 0.00 | 0.00 | 0.00 |
| 0747 | 104.237 | 31.758 | 9.6 | 104.208 | 31.732 | 9.6 | 104.193 | 31.745 | 11.8 | 104.222 | 31.771 | 11.8 | 0.00 | 0.28  | 0.28  | 0.00 | 0.11 | 0.11 |
| 0748 | 104.208 | 31.732 | 9.6 | 104.179 | 31.706 | 9.6 | 104.164 | 31.719 | 11.8 | 104.193 | 31.745 | 11.8 | 0.00 | 2.04  | 2.04  | 0.00 | 0.20 | 0.20 |
| 0749 | 104.179 | 31.706 | 9.6 | 104.150 | 31.680 | 9.6 | 104.135 | 31.694 | 11.8 | 104.164 | 31.719 | 11.8 | 0.00 | 3.22  | 3.22  | 0.00 | 0.23 | 0.23 |
| 0750 | 104.150 | 31.680 | 9.6 | 104.121 | 31.654 | 9.6 | 104.107 | 31.668 | 11.8 | 104.135 | 31.694 | 11.8 | 0.00 | 2.96  | 2.96  | 0.00 | 0.20 | 0.20 |
| 0751 | 104.121 | 31.654 | 9.6 | 104.092 | 31.629 | 9.6 | 104.078 | 31.642 | 11.8 | 104.107 | 31.668 | 11.8 | 0.00 | 1.85  | 1.85  | 0.00 | 0.14 | 0.14 |
| 0752 | 104.092 | 31.629 | 9.6 | 104.064 | 31.603 | 9.6 | 104.049 | 31.616 | 11.8 | 104.078 | 31.642 | 11.8 | 0.00 | 0.75  | 0.75  | 0.06 | 0.13 | 0.14 |
| 0753 | 104.064 | 31.603 | 9.6 | 104.035 | 31.577 | 9.6 | 104.020 | 31.590 | 11.8 | 104.049 | 31.616 | 11.8 | 0.00 | 0.00  | 0.00  | 0.07 | 0.09 | 0.11 |
| 0754 | 104.035 | 31.577 | 9.6 | 104.006 | 31.551 | 9.6 | 103.991 | 31.564 | 11.8 | 104.020 | 31.590 | 11.8 | 0.00 | 0.00  | 0.00  | 0.11 | 0.00 | 0.11 |
| 0755 | 104.006 | 31.551 | 9.6 | 103.977 | 31.525 | 9.6 | 103.962 | 31.538 | 11.8 | 103.991 | 31.564 | 11.8 | 0.00 | 0.00  | 0.00  | 0.11 | 0.00 | 0.11 |
| 0756 | 103.977 | 31.525 | 9.6 | 103.948 | 31.499 | 9.6 | 103.933 | 31.512 | 11.8 | 103.962 | 31.538 | 11.8 | 0.00 | 0.00  | 0.00  | 0.00 | 0.02 | 0.02 |

|      |         |        |      |         |        |      |         |        |      |         |        |      |      |       |       |      |      |      |
|------|---------|--------|------|---------|--------|------|---------|--------|------|---------|--------|------|------|-------|-------|------|------|------|
| 0757 | 103.948 | 31.499 | 9.6  | 103.919 | 31.473 | 9.6  | 103.904 | 31.486 | 11.8 | 103.933 | 31.512 | 11.8 | 0.00 | 0.15  | 0.15  | 0.00 | 0.12 | 0.12 |
| 0758 | 103.919 | 31.473 | 9.6  | 103.890 | 31.447 | 9.6  | 103.876 | 31.460 | 11.8 | 103.904 | 31.486 | 11.8 | 0.00 | 0.76  | 0.76  | 0.00 | 0.20 | 0.20 |
| 0759 | 103.890 | 31.447 | 9.6  | 103.861 | 31.421 | 9.6  | 103.847 | 31.434 | 11.8 | 103.876 | 31.460 | 11.8 | 0.00 | 1.47  | 1.47  | 0.00 | 0.28 | 0.28 |
| 0760 | 103.861 | 31.421 | 9.6  | 103.832 | 31.396 | 9.6  | 103.818 | 31.409 | 11.8 | 103.847 | 31.434 | 11.8 | 0.00 | 1.72  | 1.72  | 0.00 | 0.30 | 0.30 |
| 0761 | 103.832 | 31.396 | 9.6  | 103.804 | 31.370 | 9.6  | 103.789 | 31.383 | 11.8 | 103.818 | 31.409 | 11.8 | 0.00 | 1.30  | 1.30  | 0.00 | 0.23 | 0.23 |
| 0762 | 103.804 | 31.370 | 9.6  | 103.775 | 31.344 | 9.6  | 103.760 | 31.357 | 11.8 | 103.789 | 31.383 | 11.8 | 0.00 | 0.52  | 0.52  | 0.00 | 0.10 | 0.10 |
| 0763 | 103.775 | 31.344 | 9.6  | 103.746 | 31.318 | 9.6  | 103.731 | 31.331 | 11.8 | 103.760 | 31.357 | 11.8 | 0.00 | 0.00  | 0.00  | 0.00 | 0.00 | 0.00 |
| 0764 | 103.746 | 31.318 | 9.6  | 103.717 | 31.292 | 9.6  | 103.702 | 31.305 | 11.8 | 103.731 | 31.331 | 11.8 | 1.83 | 0.00  | 1.83  | 0.00 | 0.00 | 0.00 |
| 0765 | 103.717 | 31.292 | 9.6  | 103.688 | 31.266 | 9.6  | 103.673 | 31.279 | 11.8 | 103.702 | 31.305 | 11.8 | 1.19 | 1.39  | 1.83  | 0.00 | 0.12 | 0.12 |
| 0766 | 103.688 | 31.266 | 9.6  | 103.659 | 31.240 | 9.6  | 103.644 | 31.253 | 11.8 | 103.673 | 31.279 | 11.8 | 1.42 | 4.73  | 4.94  | 0.00 | 0.23 | 0.23 |
| 0767 | 103.659 | 31.240 | 9.6  | 103.630 | 31.214 | 9.6  | 103.616 | 31.227 | 11.8 | 103.644 | 31.253 | 11.8 | 2.21 | 8.41  | 8.69  | 0.00 | 0.19 | 0.19 |
| 0768 | 103.630 | 31.214 | 9.6  | 103.601 | 31.188 | 9.6  | 103.587 | 31.201 | 11.8 | 103.616 | 31.227 | 11.8 | 0.00 | 10.00 | 10.00 | 0.00 | 0.00 | 0.00 |
| 0769 | 103.601 | 31.188 | 9.6  | 103.573 | 31.163 | 9.6  | 103.558 | 31.175 | 11.8 | 103.587 | 31.201 | 11.8 | 0.00 | 10.00 | 10.00 | 0.00 | 0.00 | 0.00 |
| 0770 | 103.573 | 31.163 | 9.6  | 103.544 | 31.137 | 9.6  | 103.529 | 31.149 | 11.8 | 103.558 | 31.175 | 11.8 | 0.00 | 8.93  | 8.93  | 0.00 | 0.04 | 0.04 |
| 0771 | 103.544 | 31.137 | 9.6  | 103.515 | 31.111 | 9.6  | 103.500 | 31.124 | 11.8 | 103.529 | 31.149 | 11.8 | 0.00 | 5.96  | 5.96  | 0.00 | 0.16 | 0.16 |
| 0772 | 103.515 | 31.111 | 9.6  | 103.486 | 31.085 | 9.6  | 103.471 | 31.098 | 11.8 | 103.500 | 31.124 | 11.8 | 0.00 | 3.28  | 3.28  | 0.00 | 0.16 | 0.16 |
| 0773 | 103.486 | 31.085 | 9.6  | 103.457 | 31.059 | 9.6  | 103.442 | 31.072 | 11.8 | 103.471 | 31.098 | 11.8 | 0.00 | 2.16  | 2.16  | 0.00 | 0.10 | 0.10 |
| 0774 | 103.457 | 31.059 | 9.6  | 103.428 | 31.033 | 9.6  | 103.413 | 31.046 | 11.8 | 103.442 | 31.072 | 11.8 | 0.00 | 2.25  | 2.25  | 0.00 | 0.07 | 0.07 |
| 0775 | 103.428 | 31.033 | 9.6  | 103.399 | 31.007 | 9.6  | 103.385 | 31.020 | 11.8 | 103.413 | 31.046 | 11.8 | 0.00 | 2.19  | 2.19  | 0.00 | 0.07 | 0.07 |
| 0776 | 103.399 | 31.007 | 9.6  | 103.370 | 30.981 | 9.6  | 103.356 | 30.994 | 11.8 | 103.385 | 31.020 | 11.8 | 0.00 | 1.44  | 1.44  | 0.00 | 0.09 | 0.09 |
| 0777 | 103.370 | 30.981 | 9.6  | 103.341 | 30.955 | 9.6  | 103.327 | 30.968 | 11.8 | 103.356 | 30.994 | 11.8 | 0.00 | 0.44  | 0.44  | 0.00 | 0.09 | 0.09 |
| 0778 | 103.341 | 30.955 | 9.6  | 103.313 | 30.929 | 9.6  | 103.298 | 30.942 | 11.8 | 103.327 | 30.968 | 11.8 | 0.00 | 0.00  | 0.00  | 0.00 | 0.00 | 0.00 |
| 0779 | 103.313 | 30.929 | 9.6  | 103.284 | 30.904 | 9.6  | 103.269 | 30.916 | 11.8 | 103.298 | 30.942 | 11.8 | 0.00 | 0.00  | 0.00  | 0.00 | 0.00 | 0.00 |
| 0780 | 103.284 | 30.904 | 9.6  | 103.255 | 30.878 | 9.6  | 103.240 | 30.890 | 11.8 | 103.269 | 30.916 | 11.8 | 0.00 | 0.05  | 0.05  | 0.00 | 0.00 | 0.00 |
| 0781 | 103.255 | 30.878 | 9.6  | 103.226 | 30.852 | 9.6  | 103.211 | 30.865 | 11.8 | 103.240 | 30.890 | 11.8 | 0.00 | 0.12  | 0.12  | 0.00 | 0.01 | 0.01 |
| 0782 | 103.226 | 30.852 | 9.6  | 103.197 | 30.826 | 9.6  | 103.182 | 30.839 | 11.8 | 103.211 | 30.865 | 11.8 | 0.00 | 0.00  | 0.00  | 0.00 | 0.00 | 0.00 |
| 0783 | 103.197 | 30.826 | 9.6  | 103.168 | 30.800 | 9.6  | 103.153 | 30.813 | 11.8 | 103.182 | 30.839 | 11.8 | 0.00 | 0.00  | 0.00  | 0.00 | 0.00 | 0.00 |
| 0784 | 103.168 | 30.800 | 9.6  | 103.139 | 30.774 | 9.6  | 103.125 | 30.787 | 11.8 | 103.153 | 30.813 | 11.8 | 0.00 | 0.00  | 0.00  | 0.00 | 0.00 | 0.00 |
| 0785 | 103.139 | 30.774 | 9.6  | 103.110 | 30.748 | 9.6  | 103.096 | 30.761 | 11.8 | 103.125 | 30.787 | 11.8 | 0.00 | 0.00  | 0.00  | 0.00 | 0.00 | 0.00 |
| 0786 | 103.110 | 30.748 | 9.6  | 103.082 | 30.722 | 9.6  | 103.067 | 30.735 | 11.8 | 103.096 | 30.761 | 11.8 | 0.00 | 0.00  | 0.00  | 0.00 | 0.00 | 0.00 |
| 0787 | 104.453 | 31.978 | 11.8 | 104.424 | 31.952 | 11.8 | 104.406 | 31.968 | 13.5 | 104.435 | 31.994 | 13.5 | 0.88 | 0.74  | 1.15  | 0.06 | 0.09 | 0.11 |
| 0788 | 104.424 | 31.952 | 11.8 | 104.395 | 31.926 | 11.8 | 104.377 | 31.942 | 13.5 | 104.406 | 31.968 | 13.5 | 0.00 | 0.61  | 0.61  | 0.00 | 0.11 | 0.11 |
| 0789 | 104.395 | 31.926 | 11.8 | 104.366 | 31.900 | 11.8 | 104.348 | 31.916 | 13.5 | 104.377 | 31.942 | 13.5 | 0.00 | 1.32  | 1.32  | 0.00 | 0.11 | 0.11 |
| 0790 | 104.366 | 31.900 | 11.8 | 104.337 | 31.874 | 11.8 | 104.319 | 31.890 | 13.5 | 104.348 | 31.916 | 13.5 | 0.00 | 2.63  | 2.63  | 0.00 | 0.11 | 0.11 |
| 0791 | 104.337 | 31.874 | 11.8 | 104.308 | 31.848 | 11.8 | 104.290 | 31.864 | 13.5 | 104.319 | 31.890 | 13.5 | 0.00 | 2.73  | 2.73  | 0.00 | 0.12 | 0.12 |
| 0792 | 104.308 | 31.848 | 11.8 | 104.279 | 31.823 | 11.8 | 104.261 | 31.838 | 13.5 | 104.290 | 31.864 | 13.5 | 0.00 | 1.21  | 1.21  | 0.00 | 0.09 | 0.09 |
| 0793 | 104.279 | 31.823 | 11.8 | 104.250 | 31.797 | 11.8 | 104.233 | 31.812 | 13.5 | 104.261 | 31.838 | 13.5 | 0.00 | 0.00  | 0.00  | 0.00 | 0.00 | 0.00 |
| 0794 | 104.250 | 31.797 | 11.8 | 104.222 | 31.771 | 11.8 | 104.204 | 31.787 | 13.5 | 104.233 | 31.812 | 13.5 | 0.00 | 0.00  | 0.00  | 0.00 | 0.00 | 0.00 |
| 0795 | 104.222 | 31.771 | 11.8 | 104.193 | 31.745 | 11.8 | 104.175 | 31.761 | 13.5 | 104.204 | 31.787 | 13.5 | 0.00 | 0.00  | 0.00  | 0.00 | 0.09 | 0.09 |

|      |         |        |      |         |        |      |         |        |      |         |        |      |      |      |      |      |      |      |
|------|---------|--------|------|---------|--------|------|---------|--------|------|---------|--------|------|------|------|------|------|------|------|
| 0796 | 104.193 | 31.745 | 11.8 | 104.164 | 31.719 | 11.8 | 104.146 | 31.735 | 13.5 | 104.175 | 31.761 | 13.5 | 0.00 | 0.75 | 0.75 | 0.00 | 0.16 | 0.16 |
| 0797 | 104.164 | 31.719 | 11.8 | 104.135 | 31.693 | 11.8 | 104.117 | 31.709 | 13.5 | 104.146 | 31.735 | 13.5 | 0.00 | 1.08 | 1.08 | 0.00 | 0.17 | 0.17 |
| 0798 | 104.135 | 31.693 | 11.8 | 104.106 | 31.667 | 11.8 | 104.088 | 31.683 | 13.5 | 104.117 | 31.709 | 13.5 | 0.00 | 0.56 | 0.56 | 0.00 | 0.12 | 0.12 |
| 0799 | 104.106 | 31.667 | 11.8 | 104.077 | 31.641 | 11.8 | 104.059 | 31.657 | 13.5 | 104.088 | 31.683 | 13.5 | 0.00 | 0.00 | 0.00 | 0.00 | 0.00 | 0.00 |
| 0800 | 104.077 | 31.641 | 11.8 | 104.048 | 31.615 | 11.8 | 104.030 | 31.631 | 13.5 | 104.059 | 31.657 | 13.5 | 0.00 | 0.00 | 0.00 | 0.00 | 0.00 | 0.00 |
| 0801 | 104.048 | 31.615 | 11.8 | 104.019 | 31.589 | 11.8 | 104.001 | 31.605 | 13.5 | 104.030 | 31.631 | 13.5 | 0.00 | 0.00 | 0.00 | 0.00 | 0.00 | 0.00 |
| 0802 | 104.019 | 31.589 | 11.8 | 103.990 | 31.563 | 11.8 | 103.972 | 31.579 | 13.5 | 104.001 | 31.605 | 13.5 | 0.00 | 0.00 | 0.00 | 0.12 | 0.00 | 0.12 |
| 0803 | 103.990 | 31.563 | 11.8 | 103.962 | 31.538 | 11.8 | 103.944 | 31.553 | 13.5 | 103.972 | 31.579 | 13.5 | 0.00 | 0.00 | 0.00 | 0.12 | 0.00 | 0.12 |
| 0804 | 103.962 | 31.538 | 11.8 | 103.933 | 31.512 | 11.8 | 103.915 | 31.528 | 13.5 | 103.944 | 31.553 | 13.5 | 0.00 | 0.00 | 0.00 | 0.00 | 0.00 | 0.00 |
| 0805 | 103.933 | 31.512 | 11.8 | 103.904 | 31.486 | 11.8 | 103.886 | 31.502 | 13.5 | 103.915 | 31.528 | 13.5 | 0.00 | 0.00 | 0.00 | 0.00 | 0.00 | 0.00 |
| 0806 | 103.904 | 31.486 | 11.8 | 103.875 | 31.460 | 11.8 | 103.857 | 31.476 | 13.5 | 103.886 | 31.502 | 13.5 | 0.00 | 0.00 | 0.00 | 0.00 | 0.04 | 0.04 |
| 0807 | 103.875 | 31.460 | 11.8 | 103.846 | 31.434 | 11.8 | 103.828 | 31.450 | 13.5 | 103.857 | 31.476 | 13.5 | 0.00 | 0.21 | 0.21 | 0.00 | 0.13 | 0.13 |
| 0808 | 103.846 | 31.434 | 11.8 | 103.817 | 31.408 | 11.8 | 103.799 | 31.424 | 13.5 | 103.828 | 31.450 | 13.5 | 0.00 | 0.38 | 0.38 | 0.00 | 0.16 | 0.16 |
| 0809 | 103.817 | 31.408 | 11.8 | 103.788 | 31.382 | 11.8 | 103.770 | 31.398 | 13.5 | 103.799 | 31.424 | 13.5 | 0.00 | 0.27 | 0.27 | 0.00 | 0.11 | 0.11 |
| 0810 | 103.788 | 31.382 | 11.8 | 103.759 | 31.356 | 11.8 | 103.742 | 31.372 | 13.5 | 103.770 | 31.398 | 13.5 | 0.00 | 0.02 | 0.02 | 0.00 | 0.01 | 0.01 |
| 0811 | 103.759 | 31.356 | 11.8 | 103.731 | 31.330 | 11.8 | 103.713 | 31.346 | 13.5 | 103.742 | 31.372 | 13.5 | 0.00 | 0.00 | 0.00 | 0.00 | 0.00 | 0.00 |
| 0812 | 103.731 | 31.330 | 11.8 | 103.702 | 31.304 | 11.8 | 103.684 | 31.320 | 13.5 | 103.713 | 31.346 | 13.5 | 1.20 | 0.00 | 1.20 | 0.00 | 0.00 | 0.00 |
| 0813 | 103.702 | 31.304 | 11.8 | 103.673 | 31.279 | 11.8 | 103.655 | 31.294 | 13.5 | 103.684 | 31.320 | 13.5 | 0.12 | 0.51 | 0.52 | 0.00 | 0.03 | 0.03 |
| 0814 | 103.673 | 31.279 | 11.8 | 103.644 | 31.253 | 11.8 | 103.626 | 31.268 | 13.5 | 103.655 | 31.294 | 13.5 | 0.70 | 3.14 | 3.21 | 0.00 | 0.18 | 0.18 |
| 0815 | 103.644 | 31.253 | 11.8 | 103.615 | 31.227 | 11.8 | 103.597 | 31.243 | 13.5 | 103.626 | 31.268 | 13.5 | 2.28 | 6.98 | 7.34 | 0.00 | 0.21 | 0.21 |
| 0816 | 103.615 | 31.227 | 11.8 | 103.586 | 31.201 | 11.8 | 103.568 | 31.217 | 13.5 | 103.597 | 31.243 | 13.5 | 0.00 | 9.62 | 9.62 | 0.00 | 0.10 | 0.10 |
| 0817 | 103.586 | 31.201 | 11.8 | 103.557 | 31.175 | 11.8 | 103.539 | 31.191 | 13.5 | 103.568 | 31.217 | 13.5 | 0.00 | 9.91 | 9.91 | 0.00 | 0.00 | 0.00 |
| 0818 | 103.557 | 31.175 | 11.8 | 103.528 | 31.149 | 11.8 | 103.510 | 31.165 | 13.5 | 103.539 | 31.191 | 13.5 | 0.00 | 8.14 | 8.14 | 0.00 | 0.12 | 0.12 |
| 0819 | 103.528 | 31.149 | 11.8 | 103.499 | 31.123 | 11.8 | 103.482 | 31.139 | 13.5 | 103.510 | 31.165 | 13.5 | 0.00 | 5.19 | 5.19 | 0.00 | 0.22 | 0.22 |
| 0820 | 103.499 | 31.123 | 11.8 | 103.471 | 31.097 | 11.8 | 103.453 | 31.113 | 13.5 | 103.482 | 31.139 | 13.5 | 0.00 | 2.96 | 2.96 | 0.00 | 0.21 | 0.21 |
| 0821 | 103.471 | 31.097 | 11.8 | 103.442 | 31.071 | 11.8 | 103.424 | 31.087 | 13.5 | 103.453 | 31.113 | 13.5 | 0.00 | 2.17 | 2.17 | 0.00 | 0.16 | 0.16 |
| 0822 | 103.442 | 31.071 | 11.8 | 103.413 | 31.045 | 11.8 | 103.395 | 31.061 | 13.5 | 103.424 | 31.087 | 13.5 | 0.00 | 2.01 | 2.01 | 0.00 | 0.14 | 0.14 |
| 0823 | 103.413 | 31.045 | 11.8 | 103.384 | 31.020 | 11.8 | 103.366 | 31.035 | 13.5 | 103.395 | 31.061 | 13.5 | 0.00 | 1.48 | 1.48 | 0.00 | 0.12 | 0.12 |
| 0824 | 103.384 | 31.020 | 11.8 | 103.355 | 30.994 | 11.8 | 103.337 | 31.009 | 13.5 | 103.366 | 31.035 | 13.5 | 0.00 | 0.58 | 0.58 | 0.00 | 0.08 | 0.08 |
| 0825 | 103.355 | 30.994 | 11.8 | 103.326 | 30.968 | 11.8 | 103.308 | 30.983 | 13.5 | 103.337 | 31.009 | 13.5 | 0.00 | 0.00 | 0.00 | 0.00 | 0.06 | 0.06 |
| 0826 | 103.326 | 30.968 | 11.8 | 103.297 | 30.942 | 11.8 | 103.279 | 30.958 | 13.5 | 103.308 | 30.983 | 13.5 | 0.00 | 0.00 | 0.00 | 0.11 | 0.00 | 0.11 |
| 0827 | 103.297 | 30.942 | 11.8 | 103.269 | 30.916 | 11.8 | 103.251 | 30.932 | 13.5 | 103.279 | 30.958 | 13.5 | 0.12 | 0.51 | 0.52 | 0.13 | 0.01 | 0.13 |
| 0828 | 103.269 | 30.916 | 11.8 | 103.240 | 30.890 | 11.8 | 103.222 | 30.906 | 13.5 | 103.251 | 30.932 | 13.5 | 0.00 | 1.80 | 1.80 | 0.05 | 0.09 | 0.10 |
| 0829 | 103.240 | 30.890 | 11.8 | 103.211 | 30.864 | 11.8 | 103.193 | 30.880 | 13.5 | 103.222 | 30.906 | 13.5 | 0.00 | 1.41 | 1.41 | 0.00 | 0.14 | 0.14 |
| 0830 | 103.211 | 30.864 | 11.8 | 103.182 | 30.838 | 11.8 | 103.164 | 30.854 | 13.5 | 103.193 | 30.880 | 13.5 | 0.00 | 1.50 | 1.50 | 0.00 | 0.15 | 0.15 |
| 0831 | 103.182 | 30.838 | 11.8 | 103.153 | 30.812 | 11.8 | 103.135 | 30.828 | 13.5 | 103.164 | 30.854 | 13.5 | 0.00 | 0.17 | 0.17 | 0.00 | 0.07 | 0.07 |
| 0832 | 103.153 | 30.812 | 11.8 | 103.124 | 30.786 | 11.8 | 103.106 | 30.802 | 13.5 | 103.135 | 30.828 | 13.5 | 0.00 | 0.00 | 0.00 | 0.00 | 0.00 | 0.00 |
| 0833 | 103.124 | 30.786 | 11.8 | 103.095 | 30.761 | 11.8 | 103.077 | 30.776 | 13.5 | 103.106 | 30.802 | 13.5 | 0.00 | 0.00 | 0.00 | 0.00 | 0.00 | 0.00 |
| 0834 | 103.095 | 30.761 | 11.8 | 103.066 | 30.735 | 11.8 | 103.048 | 30.750 | 13.5 | 103.077 | 30.776 | 13.5 | 0.00 | 0.00 | 0.00 | 0.01 | 0.00 | 0.01 |

|      |         |        |      |         |        |      |         |        |      |         |        |      |      |      |      |      |      |      |
|------|---------|--------|------|---------|--------|------|---------|--------|------|---------|--------|------|------|------|------|------|------|------|
| 0835 | 104.434 | 31.993 | 13.5 | 104.405 | 31.967 | 13.5 | 104.385 | 31.985 | 14.7 | 104.414 | 32.011 | 14.7 | 1.65 | 0.23 | 1.66 | 0.05 | 0.04 | 0.06 |
| 0836 | 104.405 | 31.967 | 13.5 | 104.376 | 31.941 | 13.5 | 104.356 | 31.959 | 14.7 | 104.385 | 31.985 | 14.7 | 0.00 | 0.00 | 0.00 | 0.00 | 0.00 | 0.00 |
| 0837 | 104.376 | 31.941 | 13.5 | 104.347 | 31.916 | 13.5 | 104.327 | 31.933 | 14.7 | 104.356 | 31.959 | 14.7 | 0.00 | 0.00 | 0.00 | 0.00 | 0.00 | 0.00 |
| 0838 | 104.347 | 31.916 | 13.5 | 104.318 | 31.890 | 13.5 | 104.298 | 31.907 | 14.7 | 104.327 | 31.933 | 14.7 | 0.00 | 0.33 | 0.33 | 0.00 | 0.01 | 0.01 |
| 0839 | 104.318 | 31.890 | 13.5 | 104.290 | 31.864 | 13.5 | 104.269 | 31.881 | 14.7 | 104.298 | 31.907 | 14.7 | 0.00 | 0.40 | 0.40 | 0.00 | 0.00 | 0.00 |
| 0840 | 104.290 | 31.864 | 13.5 | 104.261 | 31.838 | 13.5 | 104.241 | 31.856 | 14.7 | 104.269 | 31.881 | 14.7 | 0.00 | 0.00 | 0.00 | 0.00 | 0.00 | 0.00 |
| 0841 | 104.261 | 31.838 | 13.5 | 104.232 | 31.812 | 13.5 | 104.212 | 31.830 | 14.7 | 104.241 | 31.856 | 14.7 | 0.00 | 0.00 | 0.00 | 0.00 | 0.00 | 0.00 |
| 0842 | 104.232 | 31.812 | 13.5 | 104.203 | 31.786 | 13.5 | 104.183 | 31.804 | 14.7 | 104.212 | 31.830 | 14.7 | 0.00 | 0.00 | 0.00 | 0.00 | 0.00 | 0.00 |
| 0843 | 104.203 | 31.786 | 13.5 | 104.174 | 31.760 | 13.5 | 104.154 | 31.778 | 14.7 | 104.183 | 31.804 | 14.7 | 0.00 | 0.00 | 0.00 | 0.00 | 0.00 | 0.00 |
| 0844 | 104.174 | 31.760 | 13.5 | 104.145 | 31.734 | 13.5 | 104.125 | 31.752 | 14.7 | 104.154 | 31.778 | 14.7 | 0.00 | 0.00 | 0.00 | 0.00 | 0.01 | 0.01 |
| 0845 | 104.145 | 31.734 | 13.5 | 104.116 | 31.708 | 13.5 | 104.096 | 31.726 | 14.7 | 104.125 | 31.752 | 14.7 | 0.00 | 0.00 | 0.00 | 0.00 | 0.00 | 0.00 |
| 0846 | 104.116 | 31.708 | 13.5 | 104.087 | 31.682 | 13.5 | 104.067 | 31.700 | 14.7 | 104.096 | 31.726 | 14.7 | 0.00 | 0.00 | 0.00 | 0.00 | 0.00 | 0.00 |
| 0847 | 104.087 | 31.682 | 13.5 | 104.058 | 31.657 | 13.5 | 104.038 | 31.674 | 14.7 | 104.067 | 31.700 | 14.7 | 0.00 | 0.00 | 0.00 | 0.00 | 0.00 | 0.00 |
| 0848 | 104.058 | 31.657 | 13.5 | 104.030 | 31.631 | 13.5 | 104.010 | 31.648 | 14.7 | 104.038 | 31.674 | 14.7 | 0.00 | 0.00 | 0.00 | 0.00 | 0.00 | 0.00 |
| 0849 | 104.030 | 31.631 | 13.5 | 104.001 | 31.605 | 13.5 | 103.981 | 31.622 | 14.7 | 104.010 | 31.648 | 14.7 | 0.00 | 0.00 | 0.00 | 0.00 | 0.00 | 0.00 |
| 0850 | 104.001 | 31.605 | 13.5 | 103.972 | 31.579 | 13.5 | 103.952 | 31.596 | 14.7 | 103.981 | 31.622 | 14.7 | 0.39 | 0.00 | 0.39 | 0.12 | 0.00 | 0.12 |
| 0851 | 103.972 | 31.579 | 13.5 | 103.943 | 31.553 | 13.5 | 103.923 | 31.571 | 14.7 | 103.952 | 31.596 | 14.7 | 0.84 | 0.00 | 0.84 | 0.14 | 0.00 | 0.14 |
| 0852 | 103.943 | 31.553 | 13.5 | 103.914 | 31.527 | 13.5 | 103.894 | 31.545 | 14.7 | 103.923 | 31.571 | 14.7 | 0.81 | 0.00 | 0.81 | 0.08 | 0.00 | 0.08 |
| 0853 | 103.914 | 31.527 | 13.5 | 103.885 | 31.501 | 13.5 | 103.865 | 31.519 | 14.7 | 103.894 | 31.545 | 14.7 | 0.46 | 0.00 | 0.46 | 0.05 | 0.00 | 0.05 |
| 0854 | 103.885 | 31.501 | 13.5 | 103.856 | 31.475 | 13.5 | 103.836 | 31.493 | 14.7 | 103.865 | 31.519 | 14.7 | 0.16 | 0.00 | 0.16 | 0.07 | 0.00 | 0.07 |
| 0855 | 103.856 | 31.475 | 13.5 | 103.827 | 31.449 | 13.5 | 103.807 | 31.467 | 14.7 | 103.836 | 31.493 | 14.7 | 0.04 | 0.00 | 0.04 | 0.06 | 0.00 | 0.06 |
| 0856 | 103.827 | 31.449 | 13.5 | 103.799 | 31.423 | 13.5 | 103.778 | 31.441 | 14.7 | 103.807 | 31.467 | 14.7 | 0.00 | 0.00 | 0.00 | 0.00 | 0.00 | 0.00 |
| 0857 | 103.799 | 31.423 | 13.5 | 103.770 | 31.397 | 13.5 | 103.750 | 31.415 | 14.7 | 103.778 | 31.441 | 14.7 | 0.00 | 0.00 | 0.00 | 0.00 | 0.00 | 0.00 |
| 0858 | 103.770 | 31.397 | 13.5 | 103.741 | 31.372 | 13.5 | 103.721 | 31.389 | 14.7 | 103.750 | 31.415 | 14.7 | 0.00 | 0.00 | 0.00 | 0.00 | 0.00 | 0.00 |
| 0859 | 103.741 | 31.372 | 13.5 | 103.712 | 31.346 | 13.5 | 103.692 | 31.363 | 14.7 | 103.721 | 31.389 | 14.7 | 0.00 | 0.00 | 0.00 | 0.00 | 0.00 | 0.00 |
| 0860 | 103.712 | 31.346 | 13.5 | 103.683 | 31.320 | 13.5 | 103.663 | 31.337 | 14.7 | 103.692 | 31.363 | 14.7 | 0.92 | 0.00 | 0.92 | 0.00 | 0.00 | 0.00 |
| 0861 | 103.683 | 31.320 | 13.5 | 103.654 | 31.294 | 13.5 | 103.634 | 31.311 | 14.7 | 103.663 | 31.337 | 14.7 | 0.00 | 0.00 | 0.00 | 0.00 | 0.00 | 0.00 |
| 0862 | 103.654 | 31.294 | 13.5 | 103.625 | 31.268 | 13.5 | 103.605 | 31.286 | 14.7 | 103.634 | 31.311 | 14.7 | 0.81 | 1.52 | 1.73 | 0.00 | 0.12 | 0.12 |
| 0863 | 103.625 | 31.268 | 13.5 | 103.596 | 31.242 | 13.5 | 103.576 | 31.260 | 14.7 | 103.605 | 31.286 | 14.7 | 2.65 | 4.64 | 5.34 | 0.00 | 0.19 | 0.19 |
| 0864 | 103.596 | 31.242 | 13.5 | 103.567 | 31.216 | 13.5 | 103.547 | 31.234 | 14.7 | 103.576 | 31.260 | 14.7 | 0.00 | 7.23 | 7.23 | 0.00 | 0.19 | 0.19 |
| 0865 | 103.567 | 31.216 | 13.5 | 103.539 | 31.190 | 13.5 | 103.519 | 31.208 | 14.7 | 103.547 | 31.234 | 14.7 | 0.00 | 7.56 | 7.56 | 0.00 | 0.15 | 0.15 |
| 0866 | 103.539 | 31.190 | 13.5 | 103.510 | 31.164 | 13.5 | 103.490 | 31.182 | 14.7 | 103.519 | 31.208 | 14.7 | 0.00 | 5.70 | 5.70 | 0.00 | 0.19 | 0.19 |
| 0867 | 103.510 | 31.164 | 13.5 | 103.481 | 31.138 | 13.5 | 103.461 | 31.156 | 14.7 | 103.490 | 31.182 | 14.7 | 0.00 | 3.13 | 3.13 | 0.00 | 0.22 | 0.22 |
| 0868 | 103.481 | 31.138 | 13.5 | 103.452 | 31.113 | 13.5 | 103.432 | 31.130 | 14.7 | 103.461 | 31.156 | 14.7 | 0.00 | 1.46 | 1.46 | 0.00 | 0.19 | 0.19 |
| 0869 | 103.452 | 31.113 | 13.5 | 103.423 | 31.087 | 13.5 | 103.403 | 31.104 | 14.7 | 103.432 | 31.130 | 14.7 | 0.00 | 0.96 | 0.96 | 0.00 | 0.13 | 0.13 |
| 0870 | 103.423 | 31.087 | 13.5 | 103.394 | 31.061 | 13.5 | 103.374 | 31.078 | 14.7 | 103.403 | 31.104 | 14.7 | 0.00 | 0.81 | 0.81 | 0.00 | 0.12 | 0.12 |
| 0871 | 103.394 | 31.061 | 13.5 | 103.365 | 31.035 | 13.5 | 103.345 | 31.052 | 14.7 | 103.374 | 31.078 | 14.7 | 0.00 | 0.42 | 0.42 | 0.00 | 0.08 | 0.08 |
| 0872 | 103.365 | 31.035 | 13.5 | 103.336 | 31.009 | 13.5 | 103.316 | 31.026 | 14.7 | 103.345 | 31.052 | 14.7 | 0.00 | 0.00 | 0.00 | 0.00 | 0.00 | 0.00 |
| 0873 | 103.336 | 31.009 | 13.5 | 103.308 | 30.983 | 13.5 | 103.288 | 31.001 | 14.7 | 103.316 | 31.026 | 14.7 | 0.00 | 0.00 | 0.00 | 0.08 | 0.00 | 0.08 |

|      |         |        |      |         |        |      |         |        |      |         |        |      |      |      |      |      |      |      |
|------|---------|--------|------|---------|--------|------|---------|--------|------|---------|--------|------|------|------|------|------|------|------|
| 0874 | 103.308 | 30.983 | 13.5 | 103.279 | 30.957 | 13.5 | 103.259 | 30.975 | 14.7 | 103.288 | 31.001 | 14.7 | 0.83 | 0.00 | 0.83 | 0.17 | 0.00 | 0.17 |
| 0875 | 103.279 | 30.957 | 13.5 | 103.250 | 30.931 | 13.5 | 103.230 | 30.949 | 14.7 | 103.259 | 30.975 | 14.7 | 1.49 | 1.62 | 2.20 | 0.19 | 0.09 | 0.21 |
| 0876 | 103.250 | 30.931 | 13.5 | 103.221 | 30.905 | 13.5 | 103.201 | 30.923 | 14.7 | 103.230 | 30.949 | 14.7 | 0.69 | 4.48 | 4.53 | 0.13 | 0.13 | 0.18 |
| 0877 | 103.221 | 30.905 | 13.5 | 103.192 | 30.879 | 13.5 | 103.172 | 30.897 | 14.7 | 103.201 | 30.923 | 14.7 | 0.00 | 5.73 | 5.73 | 0.00 | 0.17 | 0.17 |
| 0878 | 103.192 | 30.879 | 13.5 | 103.163 | 30.853 | 13.5 | 103.143 | 30.871 | 14.7 | 103.172 | 30.897 | 14.7 | 0.00 | 3.91 | 3.91 | 0.00 | 0.21 | 0.21 |
| 0879 | 103.163 | 30.853 | 13.5 | 103.134 | 30.828 | 13.5 | 103.114 | 30.845 | 14.7 | 103.143 | 30.871 | 14.7 | 0.00 | 0.89 | 0.89 | 0.00 | 0.11 | 0.11 |
| 0880 | 103.134 | 30.828 | 13.5 | 103.105 | 30.802 | 13.5 | 103.085 | 30.819 | 14.7 | 103.114 | 30.845 | 14.7 | 0.00 | 0.00 | 0.00 | 0.00 | 0.00 | 0.00 |
| 0881 | 103.105 | 30.802 | 13.5 | 103.076 | 30.776 | 13.5 | 103.056 | 30.793 | 14.7 | 103.085 | 30.819 | 14.7 | 0.00 | 0.00 | 0.00 | 0.00 | 0.00 | 0.00 |
| 0882 | 103.076 | 30.776 | 13.5 | 103.048 | 30.750 | 13.5 | 103.028 | 30.767 | 14.7 | 103.056 | 30.793 | 14.7 | 0.19 | 0.00 | 0.19 | 0.11 | 0.00 | 0.11 |
| 0883 | 104.413 | 32.010 | 14.7 | 104.384 | 31.985 | 14.7 | 104.363 | 32.003 | 15.4 | 104.392 | 32.029 | 15.4 | 2.35 | 0.00 | 2.35 | 0.09 | 0.00 | 0.09 |
| 0884 | 104.384 | 31.985 | 14.7 | 104.355 | 31.959 | 14.7 | 104.334 | 31.977 | 15.4 | 104.363 | 32.003 | 15.4 | 0.00 | 0.00 | 0.00 | 0.00 | 0.00 | 0.00 |
| 0885 | 104.355 | 31.959 | 14.7 | 104.326 | 31.933 | 14.7 | 104.305 | 31.952 | 15.4 | 104.334 | 31.977 | 15.4 | 0.00 | 0.00 | 0.00 | 0.00 | 0.00 | 0.00 |
| 0886 | 104.326 | 31.933 | 14.7 | 104.297 | 31.907 | 14.7 | 104.276 | 31.926 | 15.4 | 104.305 | 31.952 | 15.4 | 0.00 | 0.00 | 0.00 | 0.00 | 0.00 | 0.00 |
| 0887 | 104.297 | 31.907 | 14.7 | 104.269 | 31.881 | 14.7 | 104.247 | 31.900 | 15.4 | 104.276 | 31.926 | 15.4 | 0.25 | 0.00 | 0.25 | 0.05 | 0.00 | 0.05 |
| 0888 | 104.269 | 31.881 | 14.7 | 104.240 | 31.855 | 14.7 | 104.219 | 31.874 | 15.4 | 104.247 | 31.900 | 15.4 | 0.76 | 0.00 | 0.76 | 0.06 | 0.00 | 0.06 |
| 0889 | 104.240 | 31.855 | 14.7 | 104.211 | 31.829 | 14.7 | 104.190 | 31.848 | 15.4 | 104.219 | 31.874 | 15.4 | 0.37 | 0.00 | 0.37 | 0.01 | 0.00 | 0.01 |
| 0890 | 104.211 | 31.829 | 14.7 | 104.182 | 31.803 | 14.7 | 104.161 | 31.822 | 15.4 | 104.190 | 31.848 | 15.4 | 0.00 | 0.00 | 0.00 | 0.00 | 0.00 | 0.00 |
| 0891 | 104.182 | 31.803 | 14.7 | 104.153 | 31.777 | 14.7 | 104.132 | 31.796 | 15.4 | 104.161 | 31.822 | 15.4 | 0.00 | 0.00 | 0.00 | 0.00 | 0.00 | 0.00 |
| 0892 | 104.153 | 31.777 | 14.7 | 104.124 | 31.751 | 14.7 | 104.103 | 31.770 | 15.4 | 104.132 | 31.796 | 15.4 | 0.00 | 0.00 | 0.00 | 0.00 | 0.00 | 0.00 |
| 0893 | 104.124 | 31.751 | 14.7 | 104.095 | 31.725 | 14.7 | 104.074 | 31.744 | 15.4 | 104.103 | 31.770 | 15.4 | 0.00 | 0.00 | 0.00 | 0.00 | 0.00 | 0.00 |
| 0894 | 104.095 | 31.725 | 14.7 | 104.067 | 31.700 | 14.7 | 104.045 | 31.718 | 15.4 | 104.074 | 31.744 | 15.4 | 0.00 | 0.00 | 0.00 | 0.00 | 0.00 | 0.00 |
| 0895 | 104.067 | 31.700 | 14.7 | 104.038 | 31.674 | 14.7 | 104.016 | 31.692 | 15.4 | 104.045 | 31.718 | 15.4 | 0.00 | 0.00 | 0.00 | 0.00 | 0.00 | 0.00 |
| 0896 | 104.038 | 31.674 | 14.7 | 104.009 | 31.648 | 14.7 | 103.987 | 31.666 | 15.4 | 104.016 | 31.692 | 15.4 | 0.00 | 0.00 | 0.00 | 0.05 | 0.00 | 0.05 |
| 0897 | 104.009 | 31.648 | 14.7 | 103.980 | 31.622 | 14.7 | 103.959 | 31.641 | 15.4 | 103.987 | 31.666 | 15.4 | 0.20 | 0.00 | 0.20 | 0.01 | 0.00 | 0.01 |
| 0898 | 103.980 | 31.622 | 14.7 | 103.951 | 31.596 | 14.7 | 103.930 | 31.615 | 15.4 | 103.959 | 31.641 | 15.4 | 1.28 | 0.00 | 1.28 | 0.11 | 0.00 | 0.11 |
| 0899 | 103.951 | 31.596 | 14.7 | 103.922 | 31.570 | 14.7 | 103.901 | 31.589 | 15.4 | 103.930 | 31.615 | 15.4 | 2.09 | 0.00 | 2.09 | 0.15 | 0.00 | 0.15 |
| 0900 | 103.922 | 31.570 | 14.7 | 103.893 | 31.544 | 14.7 | 103.872 | 31.563 | 15.4 | 103.901 | 31.589 | 15.4 | 2.08 | 0.00 | 2.08 | 0.12 | 0.00 | 0.12 |
| 0901 | 103.893 | 31.544 | 14.7 | 103.864 | 31.518 | 14.7 | 103.843 | 31.537 | 15.4 | 103.872 | 31.563 | 15.4 | 1.68 | 0.00 | 1.68 | 0.10 | 0.00 | 0.10 |
| 0902 | 103.864 | 31.518 | 14.7 | 103.835 | 31.492 | 14.7 | 103.814 | 31.511 | 15.4 | 103.843 | 31.537 | 15.4 | 1.46 | 0.00 | 1.46 | 0.11 | 0.00 | 0.11 |
| 0903 | 103.835 | 31.492 | 14.7 | 103.807 | 31.466 | 14.7 | 103.785 | 31.485 | 15.4 | 103.814 | 31.511 | 15.4 | 1.39 | 0.00 | 1.39 | 0.11 | 0.00 | 0.11 |
| 0904 | 103.807 | 31.466 | 14.7 | 103.778 | 31.440 | 14.7 | 103.756 | 31.459 | 15.4 | 103.785 | 31.485 | 15.4 | 0.96 | 0.00 | 0.96 | 0.07 | 0.00 | 0.07 |
| 0905 | 103.778 | 31.440 | 14.7 | 103.749 | 31.415 | 14.7 | 103.728 | 31.433 | 15.4 | 103.756 | 31.459 | 15.4 | 0.20 | 0.12 | 0.23 | 0.00 | 0.00 | 0.00 |
| 0906 | 103.749 | 31.415 | 14.7 | 103.720 | 31.389 | 14.7 | 103.699 | 31.407 | 15.4 | 103.728 | 31.433 | 15.4 | 0.00 | 0.09 | 0.09 | 0.00 | 0.00 | 0.00 |
| 0907 | 103.720 | 31.389 | 14.7 | 103.691 | 31.363 | 14.7 | 103.670 | 31.381 | 15.4 | 103.699 | 31.407 | 15.4 | 0.00 | 0.00 | 0.00 | 0.00 | 0.00 | 0.00 |
| 0908 | 103.691 | 31.363 | 14.7 | 103.662 | 31.337 | 14.7 | 103.641 | 31.356 | 15.4 | 103.670 | 31.381 | 15.4 | 0.75 | 0.00 | 0.75 | 0.00 | 0.00 | 0.00 |
| 0909 | 103.662 | 31.337 | 14.7 | 103.633 | 31.311 | 14.7 | 103.612 | 31.330 | 15.4 | 103.641 | 31.356 | 15.4 | 0.00 | 0.00 | 0.00 | 0.00 | 0.00 | 0.00 |
| 0910 | 103.633 | 31.311 | 14.7 | 103.604 | 31.285 | 14.7 | 103.583 | 31.304 | 15.4 | 103.612 | 31.330 | 15.4 | 1.43 | 0.35 | 1.47 | 0.08 | 0.02 | 0.08 |
| 0911 | 103.604 | 31.285 | 14.7 | 103.576 | 31.259 | 14.7 | 103.554 | 31.278 | 15.4 | 103.583 | 31.304 | 15.4 | 3.35 | 2.08 | 3.95 | 0.09 | 0.14 | 0.17 |
| 0912 | 103.576 | 31.259 | 14.7 | 103.547 | 31.233 | 14.7 | 103.525 | 31.252 | 15.4 | 103.554 | 31.278 | 15.4 | 0.00 | 3.82 | 3.82 | 0.04 | 0.19 | 0.19 |

|      |         |        |      |         |        |      |         |        |      |         |        |      |      |      |      |      |      |      |
|------|---------|--------|------|---------|--------|------|---------|--------|------|---------|--------|------|------|------|------|------|------|------|
| 0913 | 103.547 | 31.233 | 14.7 | 103.518 | 31.207 | 14.7 | 103.496 | 31.226 | 15.4 | 103.525 | 31.252 | 15.4 | 0.00 | 3.99 | 3.99 | 0.00 | 0.20 | 0.20 |
| 0914 | 103.518 | 31.207 | 14.7 | 103.489 | 31.181 | 14.7 | 103.468 | 31.200 | 15.4 | 103.496 | 31.226 | 15.4 | 0.00 | 2.59 | 2.59 | 0.03 | 0.19 | 0.19 |
| 0915 | 103.489 | 31.181 | 14.7 | 103.460 | 31.155 | 14.7 | 103.439 | 31.174 | 15.4 | 103.468 | 31.200 | 15.4 | 0.31 | 0.92 | 0.97 | 0.08 | 0.15 | 0.17 |
| 0916 | 103.460 | 31.155 | 14.7 | 103.431 | 31.129 | 14.7 | 103.410 | 31.148 | 15.4 | 103.439 | 31.174 | 15.4 | 0.67 | 0.07 | 0.68 | 0.09 | 0.09 | 0.13 |
| 0917 | 103.431 | 31.129 | 14.7 | 103.402 | 31.104 | 14.7 | 103.381 | 31.122 | 15.4 | 103.410 | 31.148 | 15.4 | 0.51 | 0.00 | 0.51 | 0.06 | 0.00 | 0.06 |
| 0918 | 103.402 | 31.104 | 14.7 | 103.373 | 31.078 | 14.7 | 103.352 | 31.096 | 15.4 | 103.381 | 31.122 | 15.4 | 0.08 | 0.00 | 0.08 | 0.01 | 0.00 | 0.01 |
| 0919 | 103.373 | 31.078 | 14.7 | 103.344 | 31.052 | 14.7 | 103.323 | 31.070 | 15.4 | 103.352 | 31.096 | 15.4 | 0.00 | 0.00 | 0.00 | 0.00 | 0.00 | 0.00 |
| 0920 | 103.344 | 31.052 | 14.7 | 103.316 | 31.026 | 14.7 | 103.294 | 31.045 | 15.4 | 103.323 | 31.070 | 15.4 | 0.00 | 0.00 | 0.00 | 0.00 | 0.00 | 0.00 |
| 0921 | 103.316 | 31.026 | 14.7 | 103.287 | 31.000 | 14.7 | 103.266 | 31.019 | 15.4 | 103.294 | 31.045 | 15.4 | 0.36 | 0.00 | 0.36 | 0.14 | 0.00 | 0.14 |
| 0922 | 103.287 | 31.000 | 14.7 | 103.258 | 30.974 | 14.7 | 103.237 | 30.993 | 15.4 | 103.266 | 31.019 | 15.4 | 2.18 | 0.00 | 2.18 | 0.19 | 0.00 | 0.19 |
| 0923 | 103.258 | 30.974 | 14.7 | 103.229 | 30.948 | 14.7 | 103.208 | 30.967 | 15.4 | 103.237 | 30.993 | 15.4 | 3.35 | 2.41 | 4.13 | 0.17 | 0.13 | 0.21 |
| 0924 | 103.229 | 30.948 | 14.7 | 103.200 | 30.922 | 14.7 | 103.179 | 30.941 | 15.4 | 103.208 | 30.967 | 15.4 | 1.85 | 6.27 | 6.53 | 0.14 | 0.14 | 0.20 |
| 0925 | 103.200 | 30.922 | 14.7 | 103.171 | 30.896 | 14.7 | 103.150 | 30.915 | 15.4 | 103.179 | 30.941 | 15.4 | 0.00 | 7.86 | 7.86 | 0.00 | 0.18 | 0.18 |
| 0926 | 103.171 | 30.896 | 14.7 | 103.142 | 30.870 | 14.7 | 103.121 | 30.889 | 15.4 | 103.150 | 30.915 | 15.4 | 0.00 | 5.35 | 5.35 | 0.00 | 0.19 | 0.19 |
| 0927 | 103.142 | 30.870 | 14.7 | 103.114 | 30.844 | 14.7 | 103.092 | 30.863 | 15.4 | 103.121 | 30.889 | 15.4 | 0.00 | 1.00 | 1.00 | 0.00 | 0.00 | 0.00 |
| 0928 | 103.114 | 30.844 | 14.7 | 103.085 | 30.819 | 14.7 | 103.063 | 30.837 | 15.4 | 103.092 | 30.863 | 15.4 | 0.00 | 0.00 | 0.00 | 0.00 | 0.00 | 0.00 |
| 0929 | 103.085 | 30.819 | 14.7 | 103.056 | 30.793 | 14.7 | 103.034 | 30.811 | 15.4 | 103.063 | 30.837 | 15.4 | 0.00 | 0.00 | 0.00 | 0.00 | 0.00 | 0.00 |
| 0930 | 103.056 | 30.793 | 14.7 | 103.027 | 30.767 | 14.7 | 103.006 | 30.785 | 15.4 | 103.034 | 30.811 | 15.4 | 0.67 | 0.00 | 0.67 | 0.16 | 0.00 | 0.16 |
| 0931 | 104.391 | 32.029 | 15.4 | 104.362 | 32.003 | 15.4 | 104.340 | 32.022 | 15.9 | 104.369 | 32.048 | 15.9 | 2.87 | 0.00 | 2.87 | 0.12 | 0.00 | 0.12 |
| 0932 | 104.362 | 32.003 | 15.4 | 104.333 | 31.977 | 15.4 | 104.311 | 31.996 | 15.9 | 104.340 | 32.022 | 15.9 | 0.00 | 0.00 | 0.00 | 0.00 | 0.00 | 0.00 |
| 0933 | 104.333 | 31.977 | 15.4 | 104.304 | 31.951 | 15.4 | 104.283 | 31.970 | 15.9 | 104.311 | 31.996 | 15.9 | 0.00 | 0.00 | 0.00 | 0.00 | 0.00 | 0.00 |
| 0934 | 104.304 | 31.951 | 15.4 | 104.275 | 31.925 | 15.4 | 104.254 | 31.944 | 15.9 | 104.283 | 31.970 | 15.9 | 0.00 | 0.00 | 0.00 | 0.01 | 0.00 | 0.01 |
| 0935 | 104.275 | 31.925 | 15.4 | 104.246 | 31.899 | 15.4 | 104.225 | 31.918 | 15.9 | 104.254 | 31.944 | 15.9 | 1.00 | 0.00 | 1.00 | 0.08 | 0.00 | 0.08 |
| 0936 | 104.246 | 31.899 | 15.4 | 104.218 | 31.873 | 15.4 | 104.196 | 31.892 | 15.9 | 104.225 | 31.918 | 15.9 | 2.17 | 0.00 | 2.17 | 0.10 | 0.00 | 0.10 |
| 0937 | 104.218 | 31.873 | 15.4 | 104.189 | 31.847 | 15.4 | 104.167 | 31.866 | 15.9 | 104.196 | 31.892 | 15.9 | 1.51 | 0.00 | 1.51 | 0.06 | 0.00 | 0.06 |
| 0938 | 104.189 | 31.847 | 15.4 | 104.160 | 31.821 | 15.4 | 104.138 | 31.841 | 15.9 | 104.167 | 31.866 | 15.9 | 0.00 | 0.00 | 0.00 | 0.00 | 0.00 | 0.00 |
| 0939 | 104.160 | 31.821 | 15.4 | 104.131 | 31.795 | 15.4 | 104.109 | 31.815 | 15.9 | 104.138 | 31.841 | 15.9 | 0.00 | 0.00 | 0.00 | 0.00 | 0.00 | 0.00 |
| 0940 | 104.131 | 31.795 | 15.4 | 104.102 | 31.770 | 15.4 | 104.080 | 31.789 | 15.9 | 104.109 | 31.815 | 15.9 | 0.00 | 0.00 | 0.00 | 0.00 | 0.00 | 0.00 |
| 0941 | 104.102 | 31.770 | 15.4 | 104.073 | 31.744 | 15.4 | 104.052 | 31.763 | 15.9 | 104.080 | 31.789 | 15.9 | 0.00 | 0.00 | 0.00 | 0.00 | 0.00 | 0.00 |
| 0942 | 104.073 | 31.744 | 15.4 | 104.044 | 31.718 | 15.4 | 104.023 | 31.737 | 15.9 | 104.052 | 31.763 | 15.9 | 0.00 | 0.00 | 0.00 | 0.00 | 0.00 | 0.00 |
| 0943 | 104.044 | 31.718 | 15.4 | 104.015 | 31.692 | 15.4 | 103.994 | 31.711 | 15.9 | 104.023 | 31.737 | 15.9 | 0.00 | 0.00 | 0.00 | 0.00 | 0.00 | 0.00 |
| 0944 | 104.015 | 31.692 | 15.4 | 103.987 | 31.666 | 15.4 | 103.965 | 31.685 | 15.9 | 103.994 | 31.711 | 15.9 | 0.00 | 0.00 | 0.00 | 0.08 | 0.00 | 0.08 |
| 0945 | 103.987 | 31.666 | 15.4 | 103.958 | 31.640 | 15.4 | 103.936 | 31.659 | 15.9 | 103.965 | 31.685 | 15.9 | 0.40 | 0.00 | 0.40 | 0.04 | 0.00 | 0.04 |
| 0946 | 103.958 | 31.640 | 15.4 | 103.929 | 31.614 | 15.4 | 103.907 | 31.633 | 15.9 | 103.936 | 31.659 | 15.9 | 1.60 | 0.00 | 1.60 | 0.11 | 0.00 | 0.11 |
| 0947 | 103.929 | 31.614 | 15.4 | 103.900 | 31.588 | 15.4 | 103.878 | 31.607 | 15.9 | 103.907 | 31.633 | 15.9 | 2.34 | 0.00 | 2.34 | 0.15 | 0.00 | 0.15 |
| 0948 | 103.900 | 31.588 | 15.4 | 103.871 | 31.562 | 15.4 | 103.849 | 31.581 | 15.9 | 103.878 | 31.607 | 15.9 | 2.33 | 0.00 | 2.33 | 0.12 | 0.00 | 0.12 |
| 0949 | 103.871 | 31.562 | 15.4 | 103.842 | 31.536 | 15.4 | 103.820 | 31.555 | 15.9 | 103.849 | 31.581 | 15.9 | 2.21 | 0.00 | 2.21 | 0.11 | 0.00 | 0.11 |
| 0950 | 103.842 | 31.536 | 15.4 | 103.813 | 31.510 | 15.4 | 103.792 | 31.529 | 15.9 | 103.820 | 31.555 | 15.9 | 2.58 | 0.00 | 2.58 | 0.12 | 0.00 | 0.12 |
| 0951 | 103.813 | 31.510 | 15.4 | 103.784 | 31.484 | 15.4 | 103.763 | 31.504 | 15.9 | 103.792 | 31.529 | 15.9 | 3.05 | 0.00 | 3.05 | 0.13 | 0.00 | 0.13 |



|      |         |        |      |         |        |      |         |        |      |         |        |      |      |      |      |      |      |      |
|------|---------|--------|------|---------|--------|------|---------|--------|------|---------|--------|------|------|------|------|------|------|------|
| 0952 | 103.784 | 31.484 | 15.4 | 103.755 | 31.459 | 15.4 | 103.734 | 31.478 | 15.9 | 103.763 | 31.504 | 15.9 | 2.58 | 0.51 | 2.63 | 0.12 | 0.10 | 0.16 |
| 0953 | 103.755 | 31.459 | 15.4 | 103.727 | 31.433 | 15.4 | 103.705 | 31.452 | 15.9 | 103.734 | 31.478 | 15.9 | 1.03 | 0.92 | 1.38 | 0.07 | 0.13 | 0.15 |
| 0954 | 103.727 | 31.433 | 15.4 | 103.698 | 31.407 | 15.4 | 103.676 | 31.426 | 15.9 | 103.705 | 31.452 | 15.9 | 0.00 | 0.65 | 0.65 | 0.00 | 0.09 | 0.09 |
| 0955 | 103.698 | 31.407 | 15.4 | 103.669 | 31.381 | 15.4 | 103.647 | 31.400 | 15.9 | 103.676 | 31.426 | 15.9 | 0.00 | 0.02 | 0.02 | 0.00 | 0.00 | 0.00 |
| 0956 | 103.669 | 31.381 | 15.4 | 103.640 | 31.355 | 15.4 | 103.618 | 31.374 | 15.9 | 103.647 | 31.400 | 15.9 | 0.48 | 0.00 | 0.48 | 0.00 | 0.00 | 0.00 |
| 0957 | 103.640 | 31.355 | 15.4 | 103.611 | 31.329 | 15.4 | 103.590 | 31.348 | 15.9 | 103.618 | 31.374 | 15.9 | 0.00 | 0.00 | 0.00 | 0.00 | 0.00 | 0.00 |
| 0958 | 103.611 | 31.329 | 15.4 | 103.582 | 31.303 | 15.4 | 103.561 | 31.322 | 15.9 | 103.590 | 31.348 | 15.9 | 1.99 | 0.00 | 1.99 | 0.12 | 0.00 | 0.12 |
| 0959 | 103.582 | 31.303 | 15.4 | 103.553 | 31.277 | 15.4 | 103.532 | 31.296 | 15.9 | 103.561 | 31.322 | 15.9 | 3.95 | 0.35 | 3.96 | 0.15 | 0.08 | 0.17 |
| 0960 | 103.553 | 31.277 | 15.4 | 103.525 | 31.251 | 15.4 | 103.503 | 31.270 | 15.9 | 103.532 | 31.296 | 15.9 | 0.00 | 1.04 | 1.04 | 0.12 | 0.13 | 0.18 |
| 0961 | 103.525 | 31.251 | 15.4 | 103.496 | 31.225 | 15.4 | 103.474 | 31.244 | 15.9 | 103.503 | 31.270 | 15.9 | 0.00 | 1.07 | 1.07 | 0.09 | 0.18 | 0.20 |
| 0962 | 103.496 | 31.225 | 15.4 | 103.467 | 31.199 | 15.4 | 103.445 | 31.218 | 15.9 | 103.474 | 31.244 | 15.9 | 0.23 | 0.49 | 0.54 | 0.10 | 0.18 | 0.21 |
| 0963 | 103.467 | 31.199 | 15.4 | 103.438 | 31.173 | 15.4 | 103.416 | 31.193 | 15.9 | 103.445 | 31.218 | 15.9 | 1.55 | 0.00 | 1.55 | 0.13 | 0.11 | 0.17 |
| 0964 | 103.438 | 31.173 | 15.4 | 103.409 | 31.148 | 15.4 | 103.387 | 31.167 | 15.9 | 103.416 | 31.193 | 15.9 | 2.51 | 0.00 | 2.51 | 0.14 | 0.00 | 0.14 |
| 0965 | 103.409 | 31.148 | 15.4 | 103.380 | 31.122 | 15.4 | 103.358 | 31.141 | 15.9 | 103.387 | 31.167 | 15.9 | 2.12 | 0.00 | 2.12 | 0.11 | 0.00 | 0.11 |
| 0966 | 103.380 | 31.122 | 15.4 | 103.351 | 31.096 | 15.4 | 103.330 | 31.115 | 15.9 | 103.358 | 31.141 | 15.9 | 0.89 | 0.00 | 0.89 | 0.06 | 0.00 | 0.06 |
| 0967 | 103.351 | 31.096 | 15.4 | 103.322 | 31.070 | 15.4 | 103.301 | 31.089 | 15.9 | 103.330 | 31.115 | 15.9 | 0.00 | 0.00 | 0.00 | 0.00 | 0.00 | 0.00 |
| 0968 | 103.322 | 31.070 | 15.4 | 103.293 | 31.044 | 15.4 | 103.272 | 31.063 | 15.9 | 103.301 | 31.089 | 15.9 | 0.00 | 0.00 | 0.00 | 0.00 | 0.00 | 0.00 |
| 0969 | 103.293 | 31.044 | 15.4 | 103.265 | 31.018 | 15.4 | 103.243 | 31.037 | 15.9 | 103.272 | 31.063 | 15.9 | 0.48 | 0.00 | 0.48 | 0.13 | 0.00 | 0.13 |
| 0970 | 103.265 | 31.018 | 15.4 | 103.236 | 30.992 | 15.4 | 103.214 | 31.011 | 15.9 | 103.243 | 31.037 | 15.9 | 2.63 | 0.00 | 2.63 | 0.20 | 0.00 | 0.20 |
| 0971 | 103.236 | 30.992 | 15.4 | 103.207 | 30.966 | 15.4 | 103.185 | 30.985 | 15.9 | 103.214 | 31.011 | 15.9 | 4.07 | 2.06 | 4.57 | 0.18 | 0.12 | 0.22 |
| 0972 | 103.207 | 30.966 | 15.4 | 103.178 | 30.940 | 15.4 | 103.156 | 30.959 | 15.9 | 103.185 | 30.985 | 15.9 | 2.33 | 5.55 | 6.02 | 0.15 | 0.16 | 0.22 |
| 0973 | 103.178 | 30.940 | 15.4 | 103.149 | 30.914 | 15.4 | 103.127 | 30.933 | 15.9 | 103.156 | 30.959 | 15.9 | 0.00 | 6.96 | 6.96 | 0.00 | 0.22 | 0.22 |
| 0974 | 103.149 | 30.914 | 15.4 | 103.120 | 30.888 | 15.4 | 103.099 | 30.907 | 15.9 | 103.127 | 30.933 | 15.9 | 0.00 | 4.66 | 4.66 | 0.00 | 0.22 | 0.22 |
| 0975 | 103.120 | 30.888 | 15.4 | 103.091 | 30.862 | 15.4 | 103.070 | 30.881 | 15.9 | 103.099 | 30.907 | 15.9 | 0.00 | 1.00 | 1.00 | 0.00 | 0.02 | 0.02 |
| 0976 | 103.091 | 30.862 | 15.4 | 103.062 | 30.837 | 15.4 | 103.041 | 30.856 | 15.9 | 103.070 | 30.881 | 15.9 | 0.00 | 0.00 | 0.00 | 0.00 | 0.00 | 0.00 |
| 0977 | 103.062 | 30.837 | 15.4 | 103.034 | 30.811 | 15.4 | 103.012 | 30.830 | 15.9 | 103.041 | 30.856 | 15.9 | 0.00 | 0.00 | 0.00 | 0.00 | 0.00 | 0.00 |
| 0978 | 103.034 | 30.811 | 15.4 | 103.005 | 30.785 | 15.4 | 102.983 | 30.804 | 15.9 | 103.012 | 30.830 | 15.9 | 0.79 | 0.00 | 0.79 | 0.16 | 0.00 | 0.16 |
| 0979 | 104.368 | 32.047 | 15.9 | 104.339 | 32.021 | 15.9 | 104.318 | 32.041 | 16.2 | 104.347 | 32.067 | 16.2 | 2.78 | 0.00 | 2.78 | 0.13 | 0.00 | 0.13 |
| 0980 | 104.339 | 32.021 | 15.9 | 104.311 | 31.995 | 15.9 | 104.289 | 32.015 | 16.2 | 104.318 | 32.041 | 16.2 | 0.00 | 0.00 | 0.00 | 0.00 | 0.00 | 0.00 |
| 0981 | 104.311 | 31.995 | 15.9 | 104.282 | 31.969 | 15.9 | 104.260 | 31.989 | 16.2 | 104.289 | 32.015 | 16.2 | 0.00 | 0.00 | 0.00 | 0.00 | 0.00 | 0.00 |
| 0982 | 104.282 | 31.969 | 15.9 | 104.253 | 31.944 | 15.9 | 104.231 | 31.963 | 16.2 | 104.260 | 31.989 | 16.2 | 0.00 | 0.06 | 0.06 | 0.06 | 0.00 | 0.06 |
| 0983 | 104.253 | 31.944 | 15.9 | 104.224 | 31.918 | 15.9 | 104.202 | 31.937 | 16.2 | 104.231 | 31.963 | 16.2 | 1.54 | 0.16 | 1.55 | 0.10 | 0.00 | 0.10 |
| 0984 | 104.224 | 31.918 | 15.9 | 104.195 | 31.892 | 15.9 | 104.173 | 31.911 | 16.2 | 104.202 | 31.937 | 16.2 | 3.18 | 0.02 | 3.18 | 0.12 | 0.00 | 0.12 |
| 0985 | 104.195 | 31.892 | 15.9 | 104.166 | 31.866 | 15.9 | 104.144 | 31.885 | 16.2 | 104.173 | 31.911 | 16.2 | 2.54 | 0.00 | 2.54 | 0.09 | 0.00 | 0.09 |
| 0986 | 104.166 | 31.866 | 15.9 | 104.137 | 31.840 | 15.9 | 104.115 | 31.859 | 16.2 | 104.144 | 31.885 | 16.2 | 0.44 | 0.00 | 0.44 | 0.04 | 0.00 | 0.04 |
| 0987 | 104.137 | 31.840 | 15.9 | 104.108 | 31.814 | 15.9 | 104.087 | 31.833 | 16.2 | 104.115 | 31.859 | 16.2 | 0.00 | 0.00 | 0.00 | 0.00 | 0.00 | 0.00 |
| 0988 | 104.108 | 31.814 | 15.9 | 104.079 | 31.788 | 15.9 | 104.058 | 31.807 | 16.2 | 104.087 | 31.833 | 16.2 | 0.00 | 0.36 | 0.36 | 0.00 | 0.06 | 0.06 |
| 0989 | 104.079 | 31.788 | 15.9 | 104.051 | 31.762 | 15.9 | 104.029 | 31.781 | 16.2 | 104.058 | 31.807 | 16.2 | 0.00 | 0.45 | 0.45 | 0.00 | 0.07 | 0.07 |
| 0990 | 104.051 | 31.762 | 15.9 | 104.022 | 31.736 | 15.9 | 104.000 | 31.756 | 16.2 | 104.029 | 31.781 | 16.2 | 0.00 | 0.02 | 0.02 | 0.00 | 0.01 | 0.01 |

|      |         |        |      |         |        |      |         |        |      |         |        |      |      |      |      |      |      |      |
|------|---------|--------|------|---------|--------|------|---------|--------|------|---------|--------|------|------|------|------|------|------|------|
| 0991 | 104.022 | 31.736 | 15.9 | 103.993 | 31.710 | 15.9 | 103.971 | 31.730 | 16.2 | 104.000 | 31.756 | 16.2 | 0.00 | 0.00 | 0.00 | 0.00 | 0.00 | 0.00 |
| 0992 | 103.993 | 31.710 | 15.9 | 103.964 | 31.684 | 15.9 | 103.942 | 31.704 | 16.2 | 103.971 | 31.730 | 16.2 | 0.00 | 0.00 | 0.00 | 0.08 | 0.00 | 0.08 |
| 0993 | 103.964 | 31.684 | 15.9 | 103.935 | 31.658 | 15.9 | 103.913 | 31.678 | 16.2 | 103.942 | 31.704 | 16.2 | 0.19 | 0.00 | 0.19 | 0.00 | 0.00 | 0.00 |
| 0994 | 103.935 | 31.658 | 15.9 | 103.906 | 31.633 | 15.9 | 103.884 | 31.652 | 16.2 | 103.913 | 31.678 | 16.2 | 0.88 | 0.00 | 0.88 | 0.09 | 0.00 | 0.09 |
| 0995 | 103.906 | 31.633 | 15.9 | 103.877 | 31.607 | 15.9 | 103.856 | 31.626 | 16.2 | 103.884 | 31.652 | 16.2 | 1.21 | 0.00 | 1.21 | 0.13 | 0.00 | 0.13 |
| 0996 | 103.877 | 31.607 | 15.9 | 103.848 | 31.581 | 15.9 | 103.827 | 31.600 | 16.2 | 103.856 | 31.626 | 16.2 | 1.17 | 0.00 | 1.17 | 0.05 | 0.00 | 0.05 |
| 0997 | 103.848 | 31.581 | 15.9 | 103.820 | 31.555 | 15.9 | 103.798 | 31.574 | 16.2 | 103.827 | 31.600 | 16.2 | 1.36 | 0.00 | 1.36 | 0.10 | 0.00 | 0.10 |
| 0998 | 103.820 | 31.555 | 15.9 | 103.791 | 31.529 | 15.9 | 103.769 | 31.548 | 16.2 | 103.798 | 31.574 | 16.2 | 2.46 | 0.00 | 2.46 | 0.13 | 0.00 | 0.13 |
| 0999 | 103.791 | 31.529 | 15.9 | 103.762 | 31.503 | 15.9 | 103.740 | 31.522 | 16.2 | 103.769 | 31.548 | 16.2 | 3.83 | 0.47 | 3.86 | 0.13 | 0.08 | 0.15 |
| 1000 | 103.762 | 31.503 | 15.9 | 103.733 | 31.477 | 15.9 | 103.711 | 31.496 | 16.2 | 103.740 | 31.522 | 16.2 | 3.78 | 1.28 | 3.99 | 0.13 | 0.16 | 0.21 |
| 1001 | 103.733 | 31.477 | 15.9 | 103.704 | 31.451 | 15.9 | 103.682 | 31.470 | 16.2 | 103.711 | 31.496 | 16.2 | 1.79 | 1.62 | 2.41 | 0.09 | 0.18 | 0.20 |
| 1002 | 103.704 | 31.451 | 15.9 | 103.675 | 31.425 | 15.9 | 103.653 | 31.444 | 16.2 | 103.682 | 31.470 | 16.2 | 0.00 | 1.02 | 1.02 | 0.00 | 0.12 | 0.12 |
| 1003 | 103.675 | 31.425 | 15.9 | 103.646 | 31.399 | 15.9 | 103.624 | 31.419 | 16.2 | 103.653 | 31.444 | 16.2 | 0.00 | 0.07 | 0.07 | 0.00 | 0.00 | 0.00 |
| 1004 | 103.646 | 31.399 | 15.9 | 103.617 | 31.373 | 15.9 | 103.596 | 31.393 | 16.2 | 103.624 | 31.419 | 16.2 | 0.14 | 0.00 | 0.14 | 0.00 | 0.00 | 0.00 |
| 1005 | 103.617 | 31.373 | 15.9 | 103.588 | 31.347 | 15.9 | 103.567 | 31.367 | 16.2 | 103.596 | 31.393 | 16.2 | 0.00 | 0.00 | 0.00 | 0.02 | 0.00 | 0.02 |
| 1006 | 103.588 | 31.347 | 15.9 | 103.560 | 31.321 | 15.9 | 103.538 | 31.341 | 16.2 | 103.567 | 31.367 | 16.2 | 2.17 | 0.00 | 2.17 | 0.12 | 0.00 | 0.12 |
| 1007 | 103.560 | 31.321 | 15.9 | 103.531 | 31.296 | 15.9 | 103.509 | 31.315 | 16.2 | 103.538 | 31.341 | 16.2 | 4.13 | 0.00 | 4.13 | 0.14 | 0.00 | 0.14 |
| 1008 | 103.531 | 31.296 | 15.9 | 103.502 | 31.270 | 15.9 | 103.480 | 31.289 | 16.2 | 103.509 | 31.315 | 16.2 | 0.00 | 0.00 | 0.00 | 0.13 | 0.02 | 0.13 |
| 1009 | 103.502 | 31.270 | 15.9 | 103.473 | 31.244 | 15.9 | 103.451 | 31.263 | 16.2 | 103.480 | 31.289 | 16.2 | 0.00 | 0.00 | 0.00 | 0.12 | 0.12 | 0.17 |
| 1010 | 103.473 | 31.244 | 15.9 | 103.444 | 31.218 | 15.9 | 103.422 | 31.237 | 16.2 | 103.451 | 31.263 | 16.2 | 0.69 | 0.29 | 0.74 | 0.11 | 0.17 | 0.20 |
| 1011 | 103.444 | 31.218 | 15.9 | 103.415 | 31.192 | 15.9 | 103.394 | 31.211 | 16.2 | 103.422 | 31.237 | 16.2 | 2.80 | 0.73 | 2.90 | 0.11 | 0.15 | 0.19 |
| 1012 | 103.415 | 31.192 | 15.9 | 103.386 | 31.166 | 15.9 | 103.365 | 31.185 | 16.2 | 103.394 | 31.211 | 16.2 | 4.21 | 0.99 | 4.33 | 0.11 | 0.11 | 0.16 |
| 1013 | 103.386 | 31.166 | 15.9 | 103.358 | 31.140 | 15.9 | 103.336 | 31.159 | 16.2 | 103.365 | 31.185 | 16.2 | 3.58 | 0.79 | 3.66 | 0.11 | 0.07 | 0.13 |
| 1014 | 103.358 | 31.140 | 15.9 | 103.329 | 31.114 | 15.9 | 103.307 | 31.133 | 16.2 | 103.336 | 31.159 | 16.2 | 1.64 | 0.33 | 1.67 | 0.09 | 0.00 | 0.09 |
| 1015 | 103.329 | 31.114 | 15.9 | 103.300 | 31.088 | 15.9 | 103.278 | 31.107 | 16.2 | 103.307 | 31.133 | 16.2 | 0.10 | 0.00 | 0.10 | 0.01 | 0.00 | 0.01 |
| 1016 | 103.300 | 31.088 | 15.9 | 103.271 | 31.062 | 15.9 | 103.249 | 31.081 | 16.2 | 103.278 | 31.107 | 16.2 | 0.00 | 0.00 | 0.00 | 0.00 | 0.00 | 0.00 |
| 1017 | 103.271 | 31.062 | 15.9 | 103.242 | 31.036 | 15.9 | 103.220 | 31.055 | 16.2 | 103.249 | 31.081 | 16.2 | 0.09 | 0.00 | 0.09 | 0.04 | 0.00 | 0.04 |
| 1018 | 103.242 | 31.036 | 15.9 | 103.213 | 31.010 | 15.9 | 103.191 | 31.030 | 16.2 | 103.220 | 31.055 | 16.2 | 1.69 | 0.00 | 1.69 | 0.16 | 0.00 | 0.16 |
| 1019 | 103.213 | 31.010 | 15.9 | 103.184 | 30.984 | 15.9 | 103.162 | 31.004 | 16.2 | 103.191 | 31.030 | 16.2 | 3.07 | 0.79 | 3.17 | 0.19 | 0.08 | 0.21 |
| 1020 | 103.184 | 30.984 | 15.9 | 103.155 | 30.959 | 15.9 | 103.134 | 30.978 | 16.2 | 103.162 | 31.004 | 16.2 | 1.69 | 2.58 | 3.08 | 0.17 | 0.12 | 0.21 |
| 1021 | 103.155 | 30.959 | 15.9 | 103.126 | 30.933 | 15.9 | 103.105 | 30.952 | 16.2 | 103.134 | 30.978 | 16.2 | 0.00 | 3.24 | 3.24 | 0.00 | 0.18 | 0.18 |
| 1022 | 103.126 | 30.933 | 15.9 | 103.098 | 30.907 | 15.9 | 103.076 | 30.926 | 16.2 | 103.105 | 30.952 | 16.2 | 0.00 | 1.86 | 1.86 | 0.00 | 0.20 | 0.20 |
| 1023 | 103.098 | 30.907 | 15.9 | 103.069 | 30.881 | 15.9 | 103.047 | 30.900 | 16.2 | 103.076 | 30.926 | 16.2 | 0.00 | 0.00 | 0.00 | 0.00 | 0.07 | 0.07 |
| 1024 | 103.069 | 30.881 | 15.9 | 103.040 | 30.855 | 15.9 | 103.018 | 30.874 | 16.2 | 103.047 | 30.900 | 16.2 | 0.00 | 0.00 | 0.00 | 0.00 | 0.00 | 0.00 |
| 1025 | 103.040 | 30.855 | 15.9 | 103.011 | 30.829 | 15.9 | 102.989 | 30.848 | 16.2 | 103.018 | 30.874 | 16.2 | 0.00 | 0.00 | 0.00 | 0.00 | 0.00 | 0.00 |
| 1026 | 103.011 | 30.829 | 15.9 | 102.982 | 30.803 | 15.9 | 102.960 | 30.822 | 16.2 | 102.989 | 30.848 | 16.2 | 0.39 | 0.00 | 0.39 | 0.10 | 0.00 | 0.10 |
| 1027 | 104.346 | 32.066 | 16.2 | 104.317 | 32.040 | 16.2 | 104.288 | 32.066 | 16.6 | 104.317 | 32.092 | 16.6 | 2.05 | 0.00 | 2.05 | 0.10 | 0.00 | 0.10 |
| 1028 | 104.317 | 32.040 | 16.2 | 104.288 | 32.014 | 16.2 | 104.259 | 32.040 | 16.6 | 104.288 | 32.066 | 16.6 | 0.00 | 0.00 | 0.00 | 0.00 | 0.00 | 0.00 |
| 1029 | 104.288 | 32.014 | 16.2 | 104.259 | 31.988 | 16.2 | 104.230 | 32.014 | 16.6 | 104.259 | 32.040 | 16.6 | 0.00 | 0.04 | 0.04 | 0.00 | 0.00 | 0.00 |

|      |         |        |      |         |        |      |         |        |      |         |        |      |      |      |      |      |      |      |
|------|---------|--------|------|---------|--------|------|---------|--------|------|---------|--------|------|------|------|------|------|------|------|
| 1030 | 104.259 | 31.988 | 16.2 | 104.230 | 31.962 | 16.2 | 104.201 | 31.988 | 16.6 | 104.230 | 32.014 | 16.6 | 0.00 | 0.37 | 0.37 | 0.06 | 0.00 | 0.06 |
| 1031 | 104.230 | 31.962 | 16.2 | 104.201 | 31.936 | 16.2 | 104.172 | 31.962 | 16.6 | 104.201 | 31.988 | 16.6 | 1.40 | 0.46 | 1.48 | 0.09 | 0.00 | 0.09 |
| 1032 | 104.201 | 31.936 | 16.2 | 104.172 | 31.910 | 16.2 | 104.143 | 31.936 | 16.6 | 104.172 | 31.962 | 16.6 | 3.02 | 0.09 | 3.02 | 0.10 | 0.00 | 0.10 |
| 1033 | 104.172 | 31.910 | 16.2 | 104.143 | 31.884 | 16.2 | 104.114 | 31.910 | 16.6 | 104.143 | 31.936 | 16.6 | 2.52 | 0.00 | 2.52 | 0.10 | 0.00 | 0.10 |
| 1034 | 104.143 | 31.884 | 16.2 | 104.115 | 31.858 | 16.2 | 104.085 | 31.884 | 16.6 | 104.114 | 31.910 | 16.6 | 0.50 | 0.00 | 0.50 | 0.06 | 0.00 | 0.06 |
| 1035 | 104.115 | 31.858 | 16.2 | 104.086 | 31.832 | 16.2 | 104.057 | 31.858 | 16.6 | 104.085 | 31.884 | 16.6 | 0.00 | 0.00 | 0.00 | 0.00 | 0.00 | 0.00 |
| 1036 | 104.086 | 31.832 | 16.2 | 104.057 | 31.807 | 16.2 | 104.028 | 31.832 | 16.6 | 104.057 | 31.858 | 16.6 | 0.00 | 0.78 | 0.78 | 0.00 | 0.09 | 0.09 |
| 1037 | 104.057 | 31.807 | 16.2 | 104.028 | 31.781 | 16.2 | 103.999 | 31.806 | 16.6 | 104.028 | 31.832 | 16.6 | 0.00 | 1.23 | 1.23 | 0.00 | 0.12 | 0.12 |
| 1038 | 104.028 | 31.781 | 16.2 | 103.999 | 31.755 | 16.2 | 103.970 | 31.781 | 16.6 | 103.999 | 31.806 | 16.6 | 0.00 | 0.64 | 0.64 | 0.00 | 0.08 | 0.08 |
| 1039 | 103.999 | 31.755 | 16.2 | 103.970 | 31.729 | 16.2 | 103.941 | 31.755 | 16.6 | 103.970 | 31.781 | 16.6 | 0.00 | 0.00 | 0.00 | 0.00 | 0.01 | 0.01 |
| 1040 | 103.970 | 31.729 | 16.2 | 103.941 | 31.703 | 16.2 | 103.912 | 31.729 | 16.6 | 103.941 | 31.755 | 16.6 | 0.00 | 0.00 | 0.00 | 0.08 | 0.00 | 0.08 |
| 1041 | 103.941 | 31.703 | 16.2 | 103.912 | 31.677 | 16.2 | 103.883 | 31.703 | 16.6 | 103.912 | 31.729 | 16.6 | 0.00 | 0.00 | 0.00 | 0.00 | 0.00 | 0.00 |
| 1042 | 103.912 | 31.677 | 16.2 | 103.883 | 31.651 | 16.2 | 103.854 | 31.677 | 16.6 | 103.883 | 31.703 | 16.6 | 0.02 | 0.00 | 0.02 | 0.06 | 0.00 | 0.06 |
| 1043 | 103.883 | 31.651 | 16.2 | 103.855 | 31.625 | 16.2 | 103.826 | 31.651 | 16.6 | 103.854 | 31.677 | 16.6 | 0.00 | 0.00 | 0.00 | 0.11 | 0.00 | 0.11 |
| 1044 | 103.855 | 31.625 | 16.2 | 103.826 | 31.599 | 16.2 | 103.797 | 31.625 | 16.6 | 103.826 | 31.651 | 16.6 | 0.00 | 0.00 | 0.00 | 0.00 | 0.00 | 0.00 |
| 1045 | 103.826 | 31.599 | 16.2 | 103.797 | 31.573 | 16.2 | 103.768 | 31.599 | 16.6 | 103.797 | 31.625 | 16.6 | 0.13 | 0.00 | 0.13 | 0.08 | 0.00 | 0.08 |
| 1046 | 103.797 | 31.573 | 16.2 | 103.768 | 31.547 | 16.2 | 103.739 | 31.573 | 16.6 | 103.768 | 31.599 | 16.6 | 1.40 | 0.16 | 1.41 | 0.14 | 0.06 | 0.15 |
| 1047 | 103.768 | 31.547 | 16.2 | 103.739 | 31.521 | 16.2 | 103.710 | 31.547 | 16.6 | 103.739 | 31.573 | 16.6 | 3.45 | 0.75 | 3.53 | 0.14 | 0.12 | 0.18 |
| 1048 | 103.739 | 31.521 | 16.2 | 103.710 | 31.495 | 16.2 | 103.681 | 31.521 | 16.6 | 103.710 | 31.547 | 16.6 | 4.02 | 1.31 | 4.23 | 0.11 | 0.14 | 0.18 |
| 1049 | 103.710 | 31.495 | 16.2 | 103.681 | 31.470 | 16.2 | 103.652 | 31.495 | 16.6 | 103.681 | 31.521 | 16.6 | 2.04 | 1.28 | 2.41 | 0.08 | 0.14 | 0.16 |
| 1050 | 103.681 | 31.470 | 16.2 | 103.653 | 31.444 | 16.2 | 103.623 | 31.469 | 16.6 | 103.652 | 31.495 | 16.6 | 0.00 | 0.63 | 0.63 | 0.00 | 0.09 | 0.09 |
| 1051 | 103.653 | 31.444 | 16.2 | 103.624 | 31.418 | 16.2 | 103.594 | 31.443 | 16.6 | 103.623 | 31.469 | 16.6 | 0.00 | 0.00 | 0.00 | 0.00 | 0.00 | 0.00 |
| 1052 | 103.624 | 31.418 | 16.2 | 103.595 | 31.392 | 16.2 | 103.566 | 31.418 | 16.6 | 103.594 | 31.443 | 16.6 | 0.00 | 0.00 | 0.00 | 0.00 | 0.00 | 0.00 |
| 1053 | 103.595 | 31.392 | 16.2 | 103.566 | 31.366 | 16.2 | 103.537 | 31.392 | 16.6 | 103.566 | 31.418 | 16.6 | 0.00 | 0.00 | 0.00 | 0.02 | 0.00 | 0.02 |
| 1054 | 103.566 | 31.366 | 16.2 | 103.537 | 31.340 | 16.2 | 103.508 | 31.366 | 16.6 | 103.537 | 31.392 | 16.6 | 1.90 | 0.00 | 1.90 | 0.09 | 0.00 | 0.09 |
| 1055 | 103.537 | 31.340 | 16.2 | 103.508 | 31.314 | 16.2 | 103.479 | 31.340 | 16.6 | 103.508 | 31.366 | 16.6 | 3.86 | 0.00 | 3.86 | 0.10 | 0.00 | 0.10 |
| 1056 | 103.508 | 31.314 | 16.2 | 103.479 | 31.288 | 16.2 | 103.450 | 31.314 | 16.6 | 103.479 | 31.340 | 16.6 | 0.00 | 0.00 | 0.00 | 0.10 | 0.00 | 0.10 |
| 1057 | 103.479 | 31.288 | 16.2 | 103.450 | 31.262 | 16.2 | 103.421 | 31.288 | 16.6 | 103.450 | 31.314 | 16.6 | 0.00 | 0.29 | 0.29 | 0.11 | 0.10 | 0.15 |
| 1058 | 103.450 | 31.262 | 16.2 | 103.421 | 31.236 | 16.2 | 103.392 | 31.262 | 16.6 | 103.421 | 31.288 | 16.6 | 0.78 | 1.62 | 1.80 | 0.09 | 0.15 | 0.17 |
| 1059 | 103.421 | 31.236 | 16.2 | 103.393 | 31.210 | 16.2 | 103.364 | 31.236 | 16.6 | 103.392 | 31.262 | 16.6 | 3.14 | 2.82 | 4.22 | 0.08 | 0.16 | 0.18 |
| 1060 | 103.393 | 31.210 | 16.2 | 103.364 | 31.184 | 16.2 | 103.335 | 31.210 | 16.6 | 103.364 | 31.236 | 16.6 | 4.69 | 3.11 | 5.62 | 0.08 | 0.16 | 0.18 |
| 1061 | 103.364 | 31.184 | 16.2 | 103.335 | 31.158 | 16.2 | 103.306 | 31.184 | 16.6 | 103.335 | 31.210 | 16.6 | 3.92 | 2.45 | 4.63 | 0.11 | 0.13 | 0.17 |
| 1062 | 103.335 | 31.158 | 16.2 | 103.306 | 31.133 | 16.2 | 103.277 | 31.158 | 16.6 | 103.306 | 31.184 | 16.6 | 1.71 | 1.34 | 2.17 | 0.10 | 0.07 | 0.12 |
| 1063 | 103.306 | 31.133 | 16.2 | 103.277 | 31.107 | 16.2 | 103.248 | 31.132 | 16.6 | 103.277 | 31.158 | 16.6 | 0.02 | 0.37 | 0.38 | 0.00 | 0.00 | 0.00 |
| 1064 | 103.277 | 31.107 | 16.2 | 103.248 | 31.081 | 16.2 | 103.219 | 31.106 | 16.6 | 103.248 | 31.132 | 16.6 | 0.00 | 0.00 | 0.00 | 0.00 | 0.00 | 0.00 |
| 1065 | 103.248 | 31.081 | 16.2 | 103.219 | 31.055 | 16.2 | 103.190 | 31.080 | 16.6 | 103.219 | 31.106 | 16.6 | 0.00 | 0.00 | 0.00 | 0.00 | 0.00 | 0.00 |
| 1066 | 103.219 | 31.055 | 16.2 | 103.191 | 31.029 | 16.2 | 103.161 | 31.055 | 16.6 | 103.190 | 31.080 | 16.6 | 0.42 | 0.00 | 0.42 | 0.11 | 0.00 | 0.11 |
| 1067 | 103.191 | 31.029 | 16.2 | 103.162 | 31.003 | 16.2 | 103.132 | 31.029 | 16.6 | 103.161 | 31.054 | 16.6 | 1.28 | 0.00 | 1.28 | 0.16 | 0.00 | 0.16 |
| 1068 | 103.162 | 31.003 | 16.2 | 103.133 | 30.977 | 16.2 | 103.104 | 31.003 | 16.6 | 103.132 | 31.029 | 16.6 | 0.55 | 0.00 | 0.55 | 0.13 | 0.00 | 0.13 |

|      |         |        |      |         |        |      |         |        |      |         |        |      |      |      |      |      |      |      |
|------|---------|--------|------|---------|--------|------|---------|--------|------|---------|--------|------|------|------|------|------|------|------|
| 1069 | 103.133 | 30.977 | 16.2 | 103.104 | 30.951 | 16.2 | 103.075 | 30.977 | 16.6 | 103.104 | 31.003 | 16.6 | 0.00 | 0.00 | 0.00 | 0.00 | 0.03 | 0.03 |
| 1070 | 103.104 | 30.951 | 16.2 | 103.075 | 30.925 | 16.2 | 103.046 | 30.951 | 16.6 | 103.075 | 30.977 | 16.6 | 0.00 | 0.00 | 0.00 | 0.00 | 0.00 | 0.00 |
| 1071 | 103.075 | 30.925 | 16.2 | 103.046 | 30.899 | 16.2 | 103.017 | 30.925 | 16.6 | 103.046 | 30.951 | 16.6 | 0.00 | 0.00 | 0.00 | 0.00 | 0.00 | 0.00 |
| 1072 | 103.046 | 30.899 | 16.2 | 103.017 | 30.873 | 16.2 | 102.988 | 30.899 | 16.6 | 103.017 | 30.925 | 16.6 | 0.00 | 0.00 | 0.00 | 0.00 | 0.00 | 0.00 |
| 1073 | 103.017 | 30.873 | 16.2 | 102.988 | 30.847 | 16.2 | 102.959 | 30.873 | 16.6 | 102.988 | 30.899 | 16.6 | 0.00 | 0.00 | 0.00 | 0.00 | 0.00 | 0.00 |
| 1074 | 102.988 | 30.847 | 16.2 | 102.960 | 30.821 | 16.2 | 102.930 | 30.847 | 16.6 | 102.959 | 30.873 | 16.6 | 0.00 | 0.00 | 0.00 | 0.00 | 0.00 | 0.00 |
| 1075 | 104.315 | 32.091 | 16.6 | 104.286 | 32.065 | 16.6 | 104.257 | 32.091 | 17.0 | 104.286 | 32.117 | 17.0 | 1.38 | 0.00 | 1.38 | 0.07 | 0.00 | 0.07 |
| 1076 | 104.286 | 32.065 | 16.6 | 104.257 | 32.039 | 16.6 | 104.228 | 32.065 | 17.0 | 104.257 | 32.091 | 17.0 | 0.00 | 0.14 | 0.14 | 0.00 | 0.01 | 0.01 |
| 1077 | 104.257 | 32.039 | 16.6 | 104.229 | 32.013 | 16.6 | 104.200 | 32.039 | 17.0 | 104.228 | 32.065 | 17.0 | 0.00 | 0.51 | 0.51 | 0.00 | 0.05 | 0.05 |
| 1078 | 104.229 | 32.013 | 16.6 | 104.200 | 31.987 | 16.6 | 104.171 | 32.013 | 17.0 | 104.200 | 32.039 | 17.0 | 0.00 | 0.91 | 0.91 | 0.03 | 0.08 | 0.09 |
| 1079 | 104.200 | 31.987 | 16.6 | 104.171 | 31.961 | 16.6 | 104.142 | 31.987 | 17.0 | 104.171 | 32.013 | 17.0 | 0.66 | 0.75 | 1.00 | 0.07 | 0.06 | 0.09 |
| 1080 | 104.171 | 31.961 | 16.6 | 104.142 | 31.935 | 16.6 | 104.113 | 31.961 | 17.0 | 104.142 | 31.987 | 17.0 | 1.67 | 0.13 | 1.67 | 0.09 | 0.00 | 0.09 |
| 1081 | 104.142 | 31.935 | 16.6 | 104.113 | 31.909 | 16.6 | 104.084 | 31.935 | 17.0 | 104.113 | 31.961 | 17.0 | 1.39 | 0.00 | 1.39 | 0.09 | 0.00 | 0.09 |
| 1082 | 104.113 | 31.909 | 16.6 | 104.084 | 31.883 | 16.6 | 104.055 | 31.909 | 17.0 | 104.084 | 31.935 | 17.0 | 0.17 | 0.00 | 0.17 | 0.03 | 0.00 | 0.03 |
| 1083 | 104.084 | 31.883 | 16.6 | 104.055 | 31.857 | 16.6 | 104.026 | 31.883 | 17.0 | 104.055 | 31.909 | 17.0 | 0.00 | 0.00 | 0.00 | 0.00 | 0.00 | 0.00 |
| 1084 | 104.055 | 31.857 | 16.6 | 104.026 | 31.831 | 16.6 | 103.997 | 31.857 | 17.0 | 104.026 | 31.883 | 17.0 | 0.00 | 0.66 | 0.66 | 0.00 | 0.07 | 0.07 |
| 1085 | 104.026 | 31.831 | 16.6 | 103.998 | 31.805 | 16.6 | 103.969 | 31.831 | 17.0 | 103.997 | 31.857 | 17.0 | 0.00 | 1.29 | 1.29 | 0.00 | 0.13 | 0.13 |
| 1086 | 103.998 | 31.805 | 16.6 | 103.969 | 31.779 | 16.6 | 103.940 | 31.805 | 17.0 | 103.969 | 31.831 | 17.0 | 0.00 | 0.95 | 0.95 | 0.00 | 0.13 | 0.13 |
| 1087 | 103.969 | 31.779 | 16.6 | 103.940 | 31.754 | 16.6 | 103.911 | 31.779 | 17.0 | 103.940 | 31.805 | 17.0 | 0.03 | 0.22 | 0.22 | 0.00 | 0.05 | 0.05 |
| 1088 | 103.940 | 31.754 | 16.6 | 103.911 | 31.728 | 16.6 | 103.882 | 31.753 | 17.0 | 103.911 | 31.779 | 17.0 | 0.41 | 0.00 | 0.41 | 0.08 | 0.00 | 0.08 |
| 1089 | 103.911 | 31.728 | 16.6 | 103.882 | 31.702 | 16.6 | 103.853 | 31.727 | 17.0 | 103.882 | 31.753 | 17.0 | 0.23 | 0.00 | 0.23 | 0.07 | 0.00 | 0.07 |
| 1090 | 103.882 | 31.702 | 16.6 | 103.853 | 31.676 | 16.6 | 103.824 | 31.702 | 17.0 | 103.853 | 31.727 | 17.0 | 0.00 | 0.00 | 0.00 | 0.00 | 0.00 | 0.00 |
| 1091 | 103.853 | 31.676 | 16.6 | 103.824 | 31.650 | 16.6 | 103.795 | 31.676 | 17.0 | 103.824 | 31.702 | 17.0 | 0.00 | 0.00 | 0.00 | 0.06 | 0.00 | 0.06 |
| 1092 | 103.824 | 31.650 | 16.6 | 103.795 | 31.624 | 16.6 | 103.766 | 31.650 | 17.0 | 103.795 | 31.676 | 17.0 | 0.00 | 0.00 | 0.00 | 0.00 | 0.00 | 0.00 |
| 1093 | 103.795 | 31.624 | 16.6 | 103.767 | 31.598 | 16.6 | 103.737 | 31.624 | 17.0 | 103.766 | 31.650 | 17.0 | 0.00 | 0.00 | 0.00 | 0.00 | 0.02 | 0.02 |
| 1094 | 103.767 | 31.598 | 16.6 | 103.738 | 31.572 | 16.6 | 103.709 | 31.598 | 17.0 | 103.737 | 31.624 | 17.0 | 0.38 | 0.15 | 0.41 | 0.10 | 0.07 | 0.12 |
| 1095 | 103.738 | 31.572 | 16.6 | 103.709 | 31.546 | 16.6 | 103.680 | 31.572 | 17.0 | 103.709 | 31.598 | 17.0 | 2.25 | 0.41 | 2.28 | 0.13 | 0.10 | 0.16 |
| 1096 | 103.709 | 31.546 | 16.6 | 103.680 | 31.520 | 16.6 | 103.651 | 31.546 | 17.0 | 103.680 | 31.572 | 17.0 | 3.21 | 0.44 | 3.24 | 0.10 | 0.09 | 0.13 |
| 1097 | 103.680 | 31.520 | 16.6 | 103.651 | 31.494 | 16.6 | 103.622 | 31.520 | 17.0 | 103.651 | 31.546 | 17.0 | 1.67 | 0.14 | 1.67 | 0.08 | 0.06 | 0.10 |
| 1098 | 103.651 | 31.494 | 16.6 | 103.622 | 31.468 | 16.6 | 103.593 | 31.494 | 17.0 | 103.622 | 31.520 | 17.0 | 0.00 | 0.00 | 0.00 | 0.00 | 0.00 | 0.00 |
| 1099 | 103.622 | 31.468 | 16.6 | 103.593 | 31.442 | 16.6 | 103.564 | 31.468 | 17.0 | 103.593 | 31.494 | 17.0 | 0.00 | 0.00 | 0.00 | 0.00 | 0.00 | 0.00 |
| 1100 | 103.593 | 31.442 | 16.6 | 103.564 | 31.416 | 16.6 | 103.535 | 31.442 | 17.0 | 103.564 | 31.468 | 17.0 | 0.00 | 0.00 | 0.00 | 0.00 | 0.00 | 0.00 |
| 1101 | 103.564 | 31.416 | 16.6 | 103.536 | 31.390 | 16.6 | 103.507 | 31.416 | 17.0 | 103.535 | 31.442 | 17.0 | 0.00 | 0.00 | 0.00 | 0.01 | 0.00 | 0.01 |
| 1102 | 103.536 | 31.390 | 16.6 | 103.507 | 31.365 | 16.6 | 103.478 | 31.390 | 17.0 | 103.507 | 31.416 | 17.0 | 1.40 | 0.00 | 1.40 | 0.09 | 0.00 | 0.09 |
| 1103 | 103.507 | 31.365 | 16.6 | 103.478 | 31.339 | 16.6 | 103.449 | 31.364 | 17.0 | 103.478 | 31.390 | 17.0 | 3.31 | 0.00 | 3.31 | 0.12 | 0.00 | 0.12 |
| 1104 | 103.478 | 31.339 | 16.6 | 103.449 | 31.313 | 16.6 | 103.420 | 31.338 | 17.0 | 103.449 | 31.364 | 17.0 | 0.00 | 0.00 | 0.00 | 0.10 | 0.06 | 0.12 |
| 1105 | 103.449 | 31.313 | 16.6 | 103.420 | 31.287 | 16.6 | 103.391 | 31.312 | 17.0 | 103.420 | 31.338 | 17.0 | 0.00 | 1.15 | 1.15 | 0.08 | 0.11 | 0.14 |
| 1106 | 103.420 | 31.287 | 16.6 | 103.391 | 31.261 | 16.6 | 103.362 | 31.287 | 17.0 | 103.391 | 31.312 | 17.0 | 0.42 | 3.28 | 3.31 | 0.10 | 0.11 | 0.15 |
| 1107 | 103.391 | 31.261 | 16.6 | 103.362 | 31.235 | 16.6 | 103.333 | 31.261 | 17.0 | 103.362 | 31.287 | 17.0 | 2.28 | 4.79 | 5.31 | 0.11 | 0.11 | 0.16 |

|      |         |        |      |         |        |      |         |        |      |         |        |      |      |      |      |      |      |      |
|------|---------|--------|------|---------|--------|------|---------|--------|------|---------|--------|------|------|------|------|------|------|------|
| 1108 | 103.362 | 31.235 | 16.6 | 103.333 | 31.209 | 16.6 | 103.304 | 31.235 | 17.0 | 103.333 | 31.261 | 17.0 | 3.59 | 4.90 | 6.07 | 0.11 | 0.12 | 0.16 |
| 1109 | 103.333 | 31.209 | 16.6 | 103.305 | 31.183 | 16.6 | 103.275 | 31.209 | 17.0 | 103.304 | 31.235 | 17.0 | 2.96 | 3.89 | 4.89 | 0.13 | 0.12 | 0.18 |
| 1110 | 103.305 | 31.183 | 16.6 | 103.276 | 31.157 | 16.6 | 103.247 | 31.183 | 17.0 | 103.275 | 31.209 | 17.0 | 1.14 | 2.47 | 2.72 | 0.11 | 0.10 | 0.15 |
| 1111 | 103.276 | 31.157 | 16.6 | 103.247 | 31.131 | 16.6 | 103.218 | 31.157 | 17.0 | 103.247 | 31.183 | 17.0 | 0.00 | 1.23 | 1.23 | 0.00 | 0.08 | 0.08 |
| 1112 | 103.247 | 31.131 | 16.6 | 103.218 | 31.105 | 16.6 | 103.189 | 31.131 | 17.0 | 103.218 | 31.157 | 17.0 | 0.00 | 0.48 | 0.48 | 0.00 | 0.07 | 0.07 |
| 1113 | 103.218 | 31.105 | 16.6 | 103.189 | 31.079 | 16.6 | 103.160 | 31.105 | 17.0 | 103.189 | 31.131 | 17.0 | 0.00 | 0.12 | 0.12 | 0.00 | 0.04 | 0.04 |
| 1114 | 103.189 | 31.079 | 16.6 | 103.160 | 31.053 | 16.6 | 103.131 | 31.079 | 17.0 | 103.160 | 31.105 | 17.0 | 0.00 | 0.00 | 0.00 | 0.00 | 0.00 | 0.00 |
| 1115 | 103.160 | 31.053 | 16.6 | 103.131 | 31.027 | 16.6 | 103.102 | 31.053 | 17.0 | 103.131 | 31.079 | 17.0 | 0.00 | 0.00 | 0.00 | 0.06 | 0.00 | 0.06 |
| 1116 | 103.131 | 31.027 | 16.6 | 103.102 | 31.002 | 16.6 | 103.073 | 31.027 | 17.0 | 103.102 | 31.053 | 17.0 | 0.00 | 0.00 | 0.00 | 0.00 | 0.00 | 0.00 |
| 1117 | 103.102 | 31.002 | 16.6 | 103.074 | 30.976 | 16.6 | 103.044 | 31.001 | 17.0 | 103.073 | 31.027 | 17.0 | 0.00 | 0.00 | 0.00 | 0.00 | 0.00 | 0.00 |
| 1118 | 103.074 | 30.976 | 16.6 | 103.045 | 30.950 | 16.6 | 103.016 | 30.975 | 17.0 | 103.044 | 31.001 | 17.0 | 0.00 | 0.00 | 0.00 | 0.00 | 0.00 | 0.00 |
| 1119 | 103.045 | 30.950 | 16.6 | 103.016 | 30.924 | 16.6 | 102.987 | 30.949 | 17.0 | 103.016 | 30.975 | 17.0 | 0.00 | 0.00 | 0.00 | 0.00 | 0.00 | 0.00 |
| 1120 | 103.016 | 30.924 | 16.6 | 102.987 | 30.898 | 16.6 | 102.958 | 30.923 | 17.0 | 102.987 | 30.949 | 17.0 | 0.00 | 0.00 | 0.00 | 0.00 | 0.00 | 0.00 |
| 1121 | 102.987 | 30.898 | 16.6 | 102.958 | 30.872 | 16.6 | 102.929 | 30.898 | 17.0 | 102.958 | 30.923 | 17.0 | 0.00 | 0.00 | 0.00 | 0.00 | 0.00 | 0.00 |
| 1122 | 102.958 | 30.872 | 16.6 | 102.929 | 30.846 | 16.6 | 102.900 | 30.872 | 17.0 | 102.929 | 30.898 | 17.0 | 0.00 | 0.00 | 0.00 | 0.00 | 0.00 | 0.00 |
| 1123 | 104.285 | 32.116 | 17.0 | 104.256 | 32.090 | 17.0 | 104.227 | 32.115 | 17.4 | 104.256 | 32.142 | 17.4 | 1.13 | 0.00 | 1.13 | 0.07 | 0.02 | 0.07 |
| 1124 | 104.256 | 32.090 | 17.0 | 104.227 | 32.064 | 17.0 | 104.198 | 32.090 | 17.4 | 104.227 | 32.115 | 17.4 | 0.00 | 0.40 | 0.40 | 0.00 | 0.05 | 0.05 |
| 1125 | 104.227 | 32.064 | 17.0 | 104.198 | 32.038 | 17.0 | 104.169 | 32.064 | 17.4 | 104.198 | 32.090 | 17.4 | 0.00 | 0.96 | 0.96 | 0.00 | 0.08 | 0.08 |
| 1126 | 104.198 | 32.038 | 17.0 | 104.169 | 32.012 | 17.0 | 104.140 | 32.038 | 17.4 | 104.169 | 32.064 | 17.4 | 0.00 | 1.25 | 1.25 | 0.00 | 0.10 | 0.10 |
| 1127 | 104.169 | 32.012 | 17.0 | 104.141 | 31.986 | 17.0 | 104.112 | 32.012 | 17.4 | 104.140 | 32.038 | 17.4 | 0.00 | 0.85 | 0.85 | 0.06 | 0.08 | 0.10 |
| 1128 | 104.141 | 31.986 | 17.0 | 104.112 | 31.960 | 17.0 | 104.083 | 31.986 | 17.4 | 104.112 | 32.012 | 17.4 | 0.32 | 0.10 | 0.34 | 0.07 | 0.00 | 0.07 |
| 1129 | 104.112 | 31.960 | 17.0 | 104.083 | 31.934 | 17.0 | 104.054 | 31.960 | 17.4 | 104.083 | 31.986 | 17.4 | 0.27 | 0.00 | 0.27 | 0.06 | 0.00 | 0.06 |
| 1130 | 104.083 | 31.934 | 17.0 | 104.054 | 31.908 | 17.0 | 104.025 | 31.934 | 17.4 | 104.054 | 31.960 | 17.4 | 0.00 | 0.00 | 0.00 | 0.00 | 0.00 | 0.00 |
| 1131 | 104.054 | 31.908 | 17.0 | 104.025 | 31.882 | 17.0 | 103.996 | 31.908 | 17.4 | 104.025 | 31.934 | 17.4 | 0.00 | 0.00 | 0.00 | 0.00 | 0.00 | 0.00 |
| 1132 | 104.025 | 31.882 | 17.0 | 103.996 | 31.856 | 17.0 | 103.967 | 31.882 | 17.4 | 103.996 | 31.908 | 17.4 | 0.00 | 0.15 | 0.15 | 0.00 | 0.01 | 0.01 |
| 1133 | 103.996 | 31.856 | 17.0 | 103.967 | 31.830 | 17.0 | 103.938 | 31.856 | 17.4 | 103.967 | 31.882 | 17.4 | 0.00 | 0.48 | 0.48 | 0.00 | 0.09 | 0.09 |
| 1134 | 103.967 | 31.830 | 17.0 | 103.938 | 31.804 | 17.0 | 103.909 | 31.830 | 17.4 | 103.938 | 31.856 | 17.4 | 0.38 | 0.32 | 0.50 | 0.01 | 0.09 | 0.09 |
| 1135 | 103.938 | 31.804 | 17.0 | 103.909 | 31.778 | 17.0 | 103.880 | 31.804 | 17.4 | 103.909 | 31.830 | 17.4 | 1.55 | 0.00 | 1.55 | 0.07 | 0.00 | 0.07 |
| 1136 | 103.909 | 31.778 | 17.0 | 103.881 | 31.752 | 17.0 | 103.852 | 31.778 | 17.4 | 103.880 | 31.804 | 17.4 | 2.17 | 0.00 | 2.17 | 0.09 | 0.00 | 0.09 |
| 1137 | 103.881 | 31.752 | 17.0 | 103.852 | 31.727 | 17.0 | 103.823 | 31.752 | 17.4 | 103.852 | 31.778 | 17.4 | 1.18 | 0.00 | 1.18 | 0.11 | 0.00 | 0.11 |
| 1138 | 103.852 | 31.727 | 17.0 | 103.823 | 31.701 | 17.0 | 103.794 | 31.726 | 17.4 | 103.823 | 31.752 | 17.4 | 0.00 | 0.00 | 0.00 | 0.00 | 0.00 | 0.00 |
| 1139 | 103.823 | 31.701 | 17.0 | 103.794 | 31.675 | 17.0 | 103.765 | 31.700 | 17.4 | 103.794 | 31.726 | 17.4 | 0.00 | 0.00 | 0.00 | 0.00 | 0.00 | 0.00 |
| 1140 | 103.794 | 31.675 | 17.0 | 103.765 | 31.649 | 17.0 | 103.736 | 31.674 | 17.4 | 103.765 | 31.700 | 17.4 | 0.00 | 0.00 | 0.00 | 0.00 | 0.00 | 0.00 |
| 1141 | 103.765 | 31.649 | 17.0 | 103.736 | 31.623 | 17.0 | 103.707 | 31.648 | 17.4 | 103.736 | 31.674 | 17.4 | 0.00 | 0.00 | 0.00 | 0.00 | 0.00 | 0.00 |
| 1142 | 103.736 | 31.623 | 17.0 | 103.707 | 31.597 | 17.0 | 103.678 | 31.623 | 17.4 | 103.707 | 31.648 | 17.4 | 0.00 | 0.00 | 0.00 | 0.04 | 0.00 | 0.04 |
| 1143 | 103.707 | 31.597 | 17.0 | 103.678 | 31.571 | 17.0 | 103.649 | 31.597 | 17.4 | 103.678 | 31.623 | 17.4 | 0.98 | 0.00 | 0.98 | 0.10 | 0.00 | 0.10 |
| 1144 | 103.678 | 31.571 | 17.0 | 103.650 | 31.545 | 17.0 | 103.621 | 31.571 | 17.4 | 103.649 | 31.597 | 17.4 | 1.82 | 0.00 | 1.82 | 0.13 | 0.00 | 0.13 |
| 1145 | 103.650 | 31.545 | 17.0 | 103.621 | 31.519 | 17.0 | 103.592 | 31.545 | 17.4 | 103.621 | 31.571 | 17.4 | 0.84 | 0.00 | 0.84 | 0.11 | 0.00 | 0.11 |
| 1146 | 103.621 | 31.519 | 17.0 | 103.592 | 31.493 | 17.0 | 103.563 | 31.519 | 17.4 | 103.592 | 31.545 | 17.4 | 0.00 | 0.00 | 0.00 | 0.00 | 0.00 | 0.00 |

|      |         |        |      |         |        |      |         |        |      |         |        |      |      |      |      |      |      |      |
|------|---------|--------|------|---------|--------|------|---------|--------|------|---------|--------|------|------|------|------|------|------|------|
| 1147 | 103.592 | 31.493 | 17.0 | 103.563 | 31.467 | 17.0 | 103.534 | 31.493 | 17.4 | 103.563 | 31.519 | 17.4 | 0.00 | 0.00 | 0.00 | 0.00 | 0.00 | 0.00 |
| 1148 | 103.563 | 31.467 | 17.0 | 103.534 | 31.441 | 17.0 | 103.505 | 31.467 | 17.4 | 103.534 | 31.493 | 17.4 | 0.00 | 0.00 | 0.00 | 0.00 | 0.00 | 0.00 |
| 1149 | 103.534 | 31.441 | 17.0 | 103.505 | 31.415 | 17.0 | 103.476 | 31.441 | 17.4 | 103.505 | 31.467 | 17.4 | 0.00 | 0.00 | 0.00 | 0.00 | 0.00 | 0.00 |
| 1150 | 103.505 | 31.415 | 17.0 | 103.476 | 31.389 | 17.0 | 103.447 | 31.415 | 17.4 | 103.476 | 31.441 | 17.4 | 0.78 | 0.00 | 0.78 | 0.12 | 0.00 | 0.12 |
| 1151 | 103.476 | 31.389 | 17.0 | 103.448 | 31.363 | 17.0 | 103.418 | 31.389 | 17.4 | 103.447 | 31.415 | 17.4 | 2.60 | 0.00 | 2.60 | 0.15 | 0.00 | 0.15 |
| 1152 | 103.448 | 31.363 | 17.0 | 103.419 | 31.337 | 17.0 | 103.390 | 31.363 | 17.4 | 103.418 | 31.389 | 17.4 | 0.00 | 0.16 | 0.16 | 0.08 | 0.09 | 0.12 |
| 1153 | 103.419 | 31.337 | 17.0 | 103.390 | 31.311 | 17.0 | 103.361 | 31.337 | 17.4 | 103.390 | 31.363 | 17.4 | 0.00 | 1.70 | 1.70 | 0.00 | 0.12 | 0.12 |
| 1154 | 103.390 | 31.311 | 17.0 | 103.361 | 31.285 | 17.0 | 103.332 | 31.311 | 17.4 | 103.361 | 31.337 | 17.4 | 0.00 | 3.76 | 3.76 | 0.06 | 0.10 | 0.12 |
| 1155 | 103.361 | 31.285 | 17.0 | 103.332 | 31.260 | 17.0 | 103.303 | 31.285 | 17.4 | 103.332 | 31.311 | 17.4 | 0.88 | 4.95 | 5.03 | 0.09 | 0.09 | 0.13 |
| 1156 | 103.332 | 31.260 | 17.0 | 103.303 | 31.234 | 17.0 | 103.274 | 31.259 | 17.4 | 103.303 | 31.285 | 17.4 | 1.73 | 4.82 | 5.12 | 0.11 | 0.09 | 0.14 |
| 1157 | 103.303 | 31.234 | 17.0 | 103.274 | 31.208 | 17.0 | 103.245 | 31.233 | 17.4 | 103.274 | 31.259 | 17.4 | 1.42 | 3.84 | 4.10 | 0.12 | 0.10 | 0.16 |
| 1158 | 103.274 | 31.208 | 17.0 | 103.245 | 31.182 | 17.0 | 103.216 | 31.207 | 17.4 | 103.245 | 31.233 | 17.4 | 0.40 | 2.77 | 2.79 | 0.08 | 0.12 | 0.14 |
| 1159 | 103.245 | 31.182 | 17.0 | 103.216 | 31.156 | 17.0 | 103.188 | 31.181 | 17.4 | 103.216 | 31.207 | 17.4 | 0.00 | 2.04 | 2.04 | 0.00 | 0.13 | 0.13 |
| 1160 | 103.216 | 31.156 | 17.0 | 103.188 | 31.130 | 17.0 | 103.159 | 31.155 | 17.4 | 103.188 | 31.181 | 17.4 | 0.00 | 1.68 | 1.68 | 0.00 | 0.12 | 0.12 |
| 1161 | 103.188 | 31.130 | 17.0 | 103.159 | 31.104 | 17.0 | 103.130 | 31.130 | 17.4 | 103.159 | 31.155 | 17.4 | 0.00 | 1.30 | 1.30 | 0.00 | 0.11 | 0.11 |
| 1162 | 103.159 | 31.104 | 17.0 | 103.130 | 31.078 | 17.0 | 103.101 | 31.104 | 17.4 | 103.130 | 31.130 | 17.4 | 0.00 | 0.61 | 0.61 | 0.00 | 0.09 | 0.09 |
| 1163 | 103.130 | 31.078 | 17.0 | 103.101 | 31.052 | 17.0 | 103.072 | 31.078 | 17.4 | 103.101 | 31.104 | 17.4 | 0.00 | 0.00 | 0.00 | 0.00 | 0.00 | 0.00 |
| 1164 | 103.101 | 31.052 | 17.0 | 103.072 | 31.026 | 17.0 | 103.043 | 31.052 | 17.4 | 103.072 | 31.078 | 17.4 | 0.00 | 0.00 | 0.00 | 0.00 | 0.00 | 0.00 |
| 1165 | 103.072 | 31.026 | 17.0 | 103.043 | 31.000 | 17.0 | 103.014 | 31.026 | 17.4 | 103.043 | 31.052 | 17.4 | 0.00 | 0.00 | 0.00 | 0.00 | 0.00 | 0.00 |
| 1166 | 103.043 | 31.000 | 17.0 | 103.014 | 30.974 | 17.0 | 102.985 | 31.000 | 17.4 | 103.014 | 31.026 | 17.4 | 0.00 | 0.00 | 0.00 | 0.00 | 0.00 | 0.00 |
| 1167 | 103.014 | 30.974 | 17.0 | 102.986 | 30.948 | 17.0 | 102.957 | 30.974 | 17.4 | 102.985 | 31.000 | 17.4 | 0.00 | 0.00 | 0.00 | 0.00 | 0.00 | 0.00 |
| 1168 | 102.986 | 30.948 | 17.0 | 102.957 | 30.922 | 17.0 | 102.928 | 30.948 | 17.4 | 102.957 | 30.974 | 17.4 | 0.00 | 0.00 | 0.00 | 0.00 | 0.00 | 0.00 |
| 1169 | 102.957 | 30.922 | 17.0 | 102.928 | 30.896 | 17.0 | 102.899 | 30.922 | 17.4 | 102.928 | 30.948 | 17.4 | 0.00 | 0.00 | 0.00 | 0.00 | 0.00 | 0.00 |
| 1170 | 102.928 | 30.896 | 17.0 | 102.899 | 30.870 | 17.0 | 102.870 | 30.896 | 17.4 | 102.899 | 30.922 | 17.4 | 0.00 | 0.00 | 0.00 | 0.00 | 0.00 | 0.00 |
| 1171 | 104.254 | 32.140 | 17.4 | 104.226 | 32.114 | 17.4 | 104.197 | 32.140 | 17.9 | 104.225 | 32.166 | 17.9 | 1.13 | 0.00 | 1.13 | 0.08 | 0.04 | 0.09 |
| 1172 | 104.226 | 32.114 | 17.4 | 104.197 | 32.089 | 17.4 | 104.168 | 32.114 | 17.9 | 104.197 | 32.140 | 17.9 | 0.00 | 0.47 | 0.47 | 0.00 | 0.07 | 0.07 |
| 1173 | 104.197 | 32.089 | 17.4 | 104.168 | 32.063 | 17.4 | 104.139 | 32.089 | 17.9 | 104.168 | 32.114 | 17.9 | 0.00 | 1.00 | 1.00 | 0.00 | 0.08 | 0.08 |
| 1174 | 104.168 | 32.063 | 17.4 | 104.139 | 32.037 | 17.4 | 104.110 | 32.062 | 17.9 | 104.139 | 32.089 | 17.9 | 0.00 | 1.15 | 1.15 | 0.00 | 0.09 | 0.09 |
| 1175 | 104.139 | 32.037 | 17.4 | 104.110 | 32.011 | 17.4 | 104.081 | 32.037 | 17.9 | 104.110 | 32.062 | 17.9 | 0.00 | 0.67 | 0.67 | 0.00 | 0.07 | 0.07 |
| 1176 | 104.110 | 32.011 | 17.4 | 104.081 | 31.985 | 17.4 | 104.052 | 32.011 | 17.9 | 104.081 | 32.037 | 17.9 | 0.00 | 0.04 | 0.04 | 0.00 | 0.00 | 0.00 |
| 1177 | 104.081 | 31.985 | 17.4 | 104.052 | 31.959 | 17.4 | 104.023 | 31.985 | 17.9 | 104.052 | 32.011 | 17.9 | 0.00 | 0.00 | 0.00 | 0.00 | 0.00 | 0.00 |
| 1178 | 104.052 | 31.959 | 17.4 | 104.023 | 31.933 | 17.4 | 103.995 | 31.959 | 17.9 | 104.023 | 31.985 | 17.9 | 0.00 | 0.00 | 0.00 | 0.00 | 0.00 | 0.00 |
| 1179 | 104.023 | 31.933 | 17.4 | 103.995 | 31.907 | 17.4 | 103.966 | 31.933 | 17.9 | 103.995 | 31.959 | 17.9 | 0.00 | 0.00 | 0.00 | 0.00 | 0.00 | 0.00 |
| 1180 | 103.995 | 31.907 | 17.4 | 103.966 | 31.881 | 17.4 | 103.937 | 31.907 | 17.9 | 103.966 | 31.933 | 17.9 | 0.00 | 0.00 | 0.00 | 0.01 | 0.00 | 0.01 |
| 1181 | 103.966 | 31.881 | 17.4 | 103.937 | 31.855 | 17.4 | 103.908 | 31.881 | 17.9 | 103.937 | 31.907 | 17.9 | 0.00 | 0.00 | 0.00 | 0.10 | 0.00 | 0.10 |
| 1182 | 103.937 | 31.855 | 17.4 | 103.908 | 31.829 | 17.4 | 103.879 | 31.855 | 17.9 | 103.908 | 31.881 | 17.9 | 1.19 | 0.00 | 1.19 | 0.14 | 0.00 | 0.14 |
| 1183 | 103.908 | 31.829 | 17.4 | 103.879 | 31.803 | 17.4 | 103.850 | 31.829 | 17.9 | 103.879 | 31.855 | 17.9 | 3.00 | 0.00 | 3.00 | 0.11 | 0.00 | 0.11 |
| 1184 | 103.879 | 31.803 | 17.4 | 103.850 | 31.777 | 17.4 | 103.821 | 31.803 | 17.9 | 103.850 | 31.829 | 17.9 | 3.52 | 0.00 | 3.52 | 0.11 | 0.00 | 0.11 |
| 1185 | 103.850 | 31.777 | 17.4 | 103.821 | 31.751 | 17.4 | 103.792 | 31.777 | 17.9 | 103.821 | 31.803 | 17.9 | 1.89 | 0.00 | 1.89 | 0.14 | 0.00 | 0.14 |

|      |         |        |      |         |        |      |         |        |      |         |        |      |      |      |      |      |      |      |
|------|---------|--------|------|---------|--------|------|---------|--------|------|---------|--------|------|------|------|------|------|------|------|
| 1186 | 103.821 | 31.751 | 17.4 | 103.793 | 31.725 | 17.4 | 103.763 | 31.751 | 17.9 | 103.792 | 31.777 | 17.9 | 0.00 | 0.00 | 0.00 | 0.00 | 0.00 | 0.00 |
| 1187 | 103.793 | 31.725 | 17.4 | 103.764 | 31.699 | 17.4 | 103.735 | 31.725 | 17.9 | 103.763 | 31.751 | 17.9 | 0.00 | 0.00 | 0.00 | 0.00 | 0.00 | 0.00 |
| 1188 | 103.764 | 31.699 | 17.4 | 103.735 | 31.673 | 17.4 | 103.706 | 31.699 | 17.9 | 103.735 | 31.725 | 17.9 | 0.00 | 0.00 | 0.00 | 0.00 | 0.00 | 0.00 |
| 1189 | 103.735 | 31.673 | 17.4 | 103.706 | 31.648 | 17.4 | 103.677 | 31.673 | 17.9 | 103.706 | 31.699 | 17.9 | 0.00 | 0.00 | 0.00 | 0.00 | 0.00 | 0.00 |
| 1190 | 103.706 | 31.648 | 17.4 | 103.677 | 31.622 | 17.4 | 103.648 | 31.647 | 17.9 | 103.677 | 31.673 | 17.9 | 0.00 | 0.00 | 0.00 | 0.00 | 0.00 | 0.00 |
| 1191 | 103.677 | 31.622 | 17.4 | 103.648 | 31.596 | 17.4 | 103.619 | 31.621 | 17.9 | 103.648 | 31.647 | 17.9 | 0.18 | 0.00 | 0.18 | 0.10 | 0.00 | 0.10 |
| 1192 | 103.648 | 31.596 | 17.4 | 103.619 | 31.570 | 17.4 | 103.590 | 31.595 | 17.9 | 103.619 | 31.621 | 17.9 | 0.65 | 0.00 | 0.65 | 0.15 | 0.00 | 0.15 |
| 1193 | 103.619 | 31.570 | 17.4 | 103.590 | 31.544 | 17.4 | 103.561 | 31.569 | 17.9 | 103.590 | 31.595 | 17.9 | 0.14 | 0.00 | 0.14 | 0.10 | 0.00 | 0.10 |
| 1194 | 103.590 | 31.544 | 17.4 | 103.562 | 31.518 | 17.4 | 103.532 | 31.544 | 17.9 | 103.561 | 31.569 | 17.9 | 0.00 | 0.00 | 0.00 | 0.00 | 0.00 | 0.00 |
| 1195 | 103.562 | 31.518 | 17.4 | 103.533 | 31.492 | 17.4 | 103.504 | 31.517 | 17.9 | 103.532 | 31.544 | 17.9 | 0.00 | 0.00 | 0.00 | 0.00 | 0.00 | 0.00 |
| 1196 | 103.533 | 31.492 | 17.4 | 103.504 | 31.466 | 17.4 | 103.475 | 31.492 | 17.9 | 103.504 | 31.517 | 17.9 | 0.00 | 0.00 | 0.00 | 0.00 | 0.00 | 0.00 |
| 1197 | 103.504 | 31.466 | 17.4 | 103.475 | 31.440 | 17.4 | 103.446 | 31.466 | 17.9 | 103.475 | 31.492 | 17.9 | 0.00 | 0.00 | 0.00 | 0.00 | 0.00 | 0.00 |
| 1198 | 103.475 | 31.440 | 17.4 | 103.446 | 31.414 | 17.4 | 103.417 | 31.440 | 17.9 | 103.446 | 31.466 | 17.9 | 0.21 | 0.00 | 0.21 | 0.10 | 0.00 | 0.10 |
| 1199 | 103.446 | 31.414 | 17.4 | 103.417 | 31.388 | 17.4 | 103.388 | 31.414 | 17.9 | 103.417 | 31.440 | 17.9 | 1.86 | 0.00 | 1.86 | 0.10 | 0.00 | 0.10 |
| 1200 | 103.417 | 31.388 | 17.4 | 103.388 | 31.362 | 17.4 | 103.359 | 31.388 | 17.9 | 103.388 | 31.414 | 17.9 | 0.00 | 0.36 | 0.36 | 0.00 | 0.09 | 0.09 |
| 1201 | 103.388 | 31.362 | 17.4 | 103.359 | 31.336 | 17.4 | 103.330 | 31.362 | 17.9 | 103.359 | 31.388 | 17.9 | 0.00 | 1.46 | 1.46 | 0.00 | 0.11 | 0.11 |
| 1202 | 103.359 | 31.336 | 17.4 | 103.331 | 31.310 | 17.4 | 103.302 | 31.336 | 17.9 | 103.330 | 31.362 | 17.9 | 0.00 | 2.69 | 2.69 | 0.00 | 0.10 | 0.10 |
| 1203 | 103.331 | 31.310 | 17.4 | 103.302 | 31.284 | 17.4 | 103.273 | 31.310 | 17.9 | 103.302 | 31.336 | 17.9 | 0.00 | 3.23 | 3.23 | 0.01 | 0.10 | 0.10 |
| 1204 | 103.302 | 31.284 | 17.4 | 103.273 | 31.258 | 17.4 | 103.244 | 31.284 | 17.9 | 103.273 | 31.310 | 17.9 | 0.33 | 2.96 | 2.98 | 0.05 | 0.10 | 0.11 |
| 1205 | 103.273 | 31.258 | 17.4 | 103.244 | 31.232 | 17.4 | 103.215 | 31.258 | 17.9 | 103.244 | 31.284 | 17.9 | 0.29 | 2.37 | 2.38 | 0.06 | 0.11 | 0.13 |
| 1206 | 103.244 | 31.232 | 17.4 | 103.215 | 31.206 | 17.4 | 103.186 | 31.232 | 17.9 | 103.215 | 31.258 | 17.9 | 0.00 | 2.05 | 2.05 | 0.00 | 0.14 | 0.14 |
| 1207 | 103.215 | 31.206 | 17.4 | 103.186 | 31.180 | 17.4 | 103.157 | 31.206 | 17.9 | 103.186 | 31.232 | 17.9 | 0.00 | 2.29 | 2.29 | 0.00 | 0.16 | 0.16 |
| 1208 | 103.186 | 31.180 | 17.4 | 103.157 | 31.154 | 17.4 | 103.128 | 31.180 | 17.9 | 103.157 | 31.206 | 17.9 | 0.00 | 2.75 | 2.75 | 0.00 | 0.13 | 0.13 |
| 1209 | 103.157 | 31.154 | 17.4 | 103.129 | 31.128 | 17.4 | 103.099 | 31.154 | 17.9 | 103.128 | 31.180 | 17.9 | 0.00 | 2.69 | 2.69 | 0.00 | 0.13 | 0.13 |
| 1210 | 103.129 | 31.128 | 17.4 | 103.100 | 31.103 | 17.4 | 103.070 | 31.128 | 17.9 | 103.099 | 31.154 | 17.9 | 0.00 | 1.60 | 1.60 | 0.00 | 0.16 | 0.16 |
| 1211 | 103.100 | 31.103 | 17.4 | 103.071 | 31.077 | 17.4 | 103.042 | 31.102 | 17.9 | 103.070 | 31.128 | 17.9 | 0.00 | 0.14 | 0.14 | 0.00 | 0.10 | 0.10 |
| 1212 | 103.071 | 31.077 | 17.4 | 103.042 | 31.051 | 17.4 | 103.013 | 31.076 | 17.9 | 103.042 | 31.102 | 17.9 | 0.00 | 0.00 | 0.00 | 0.00 | 0.00 | 0.00 |
| 1213 | 103.042 | 31.051 | 17.4 | 103.013 | 31.025 | 17.4 | 102.984 | 31.050 | 17.9 | 103.013 | 31.076 | 17.9 | 0.00 | 0.00 | 0.00 | 0.00 | 0.00 | 0.00 |
| 1214 | 103.013 | 31.025 | 17.4 | 102.984 | 30.999 | 17.4 | 102.955 | 31.024 | 17.9 | 102.984 | 31.050 | 17.9 | 0.00 | 0.00 | 0.00 | 0.00 | 0.00 | 0.00 |
| 1215 | 102.984 | 30.999 | 17.4 | 102.955 | 30.973 | 17.4 | 102.926 | 30.998 | 17.9 | 102.955 | 31.024 | 17.9 | 0.00 | 0.00 | 0.00 | 0.00 | 0.00 | 0.00 |
| 1216 | 102.955 | 30.973 | 17.4 | 102.926 | 30.947 | 17.4 | 102.897 | 30.973 | 17.9 | 102.926 | 30.998 | 17.9 | 0.00 | 0.00 | 0.00 | 0.00 | 0.00 | 0.00 |
| 1217 | 102.926 | 30.947 | 17.4 | 102.897 | 30.921 | 17.4 | 102.868 | 30.947 | 17.9 | 102.897 | 30.973 | 17.9 | 0.00 | 0.00 | 0.00 | 0.00 | 0.00 | 0.00 |
| 1218 | 102.897 | 30.921 | 17.4 | 102.869 | 30.895 | 17.4 | 102.840 | 30.921 | 17.9 | 102.868 | 30.947 | 17.9 | 0.46 | 0.00 | 0.46 | 0.13 | 0.00 | 0.13 |
| 1219 | 104.224 | 32.165 | 17.9 | 104.195 | 32.139 | 17.9 | 104.166 | 32.165 | 18.3 | 104.195 | 32.191 | 18.3 | 1.45 | 0.00 | 1.45 | 0.13 | 0.05 | 0.14 |
| 1220 | 104.195 | 32.139 | 17.9 | 104.166 | 32.113 | 17.9 | 104.137 | 32.139 | 18.3 | 104.166 | 32.165 | 18.3 | 0.00 | 0.34 | 0.34 | 0.00 | 0.08 | 0.08 |
| 1221 | 104.166 | 32.113 | 17.9 | 104.138 | 32.087 | 17.9 | 104.109 | 32.113 | 18.3 | 104.137 | 32.139 | 18.3 | 0.00 | 0.68 | 0.68 | 0.00 | 0.08 | 0.08 |
| 1222 | 104.138 | 32.087 | 17.9 | 104.109 | 32.062 | 17.9 | 104.080 | 32.087 | 18.3 | 104.109 | 32.113 | 18.3 | 0.00 | 0.67 | 0.67 | 0.00 | 0.08 | 0.08 |
| 1223 | 104.109 | 32.062 | 17.9 | 104.080 | 32.035 | 17.9 | 104.051 | 32.061 | 18.3 | 104.080 | 32.087 | 18.3 | 0.00 | 0.31 | 0.31 | 0.00 | 0.05 | 0.05 |
| 1224 | 104.080 | 32.035 | 17.9 | 104.051 | 32.010 | 17.9 | 104.022 | 32.035 | 18.3 | 104.051 | 32.061 | 18.3 | 0.00 | 0.00 | 0.00 | 0.00 | 0.00 | 0.00 |



|      |         |        |      |         |        |      |         |        |      |         |        |      |      |      |      |      |      |      |
|------|---------|--------|------|---------|--------|------|---------|--------|------|---------|--------|------|------|------|------|------|------|------|
| 1225 | 104.051 | 32.010 | 17.9 | 104.022 | 31.984 | 17.9 | 103.993 | 32.010 | 18.3 | 104.022 | 32.035 | 18.3 | 0.00 | 0.00 | 0.00 | 0.00 | 0.00 | 0.00 |
| 1226 | 104.022 | 31.984 | 17.9 | 103.993 | 31.958 | 17.9 | 103.964 | 31.983 | 18.3 | 103.993 | 32.010 | 18.3 | 0.00 | 0.00 | 0.00 | 0.00 | 0.00 | 0.00 |
| 1227 | 103.993 | 31.958 | 17.9 | 103.964 | 31.932 | 17.9 | 103.935 | 31.958 | 18.3 | 103.964 | 31.983 | 18.3 | 0.00 | 0.00 | 0.00 | 0.00 | 0.00 | 0.00 |
| 1228 | 103.964 | 31.932 | 17.9 | 103.935 | 31.906 | 17.9 | 103.906 | 31.932 | 18.3 | 103.935 | 31.958 | 18.3 | 0.00 | 0.00 | 0.00 | 0.07 | 0.00 | 0.07 |
| 1229 | 103.935 | 31.906 | 17.9 | 103.907 | 31.880 | 17.9 | 103.877 | 31.906 | 18.3 | 103.906 | 31.932 | 18.3 | 0.06 | 0.00 | 0.06 | 0.14 | 0.00 | 0.14 |
| 1230 | 103.907 | 31.880 | 17.9 | 103.878 | 31.854 | 17.9 | 103.849 | 31.880 | 18.3 | 103.877 | 31.906 | 18.3 | 1.35 | 0.00 | 1.35 | 0.15 | 0.00 | 0.15 |
| 1231 | 103.878 | 31.854 | 17.9 | 103.849 | 31.828 | 17.9 | 103.820 | 31.854 | 18.3 | 103.849 | 31.880 | 18.3 | 2.99 | 0.00 | 2.99 | 0.10 | 0.00 | 0.10 |
| 1232 | 103.849 | 31.828 | 17.9 | 103.820 | 31.802 | 17.9 | 103.791 | 31.828 | 18.3 | 103.820 | 31.854 | 18.3 | 3.31 | 0.00 | 3.31 | 0.14 | 0.00 | 0.14 |
| 1233 | 103.820 | 31.802 | 17.9 | 103.791 | 31.776 | 17.9 | 103.762 | 31.802 | 18.3 | 103.791 | 31.828 | 18.3 | 1.78 | 0.00 | 1.78 | 0.14 | 0.00 | 0.14 |
| 1234 | 103.791 | 31.776 | 17.9 | 103.762 | 31.750 | 17.9 | 103.733 | 31.776 | 18.3 | 103.762 | 31.802 | 18.3 | 0.02 | 0.00 | 0.02 | 0.00 | 0.00 | 0.00 |
| 1235 | 103.762 | 31.750 | 17.9 | 103.733 | 31.724 | 17.9 | 103.704 | 31.750 | 18.3 | 103.733 | 31.776 | 18.3 | 0.00 | 0.00 | 0.00 | 0.01 | 0.00 | 0.01 |
| 1236 | 103.733 | 31.724 | 17.9 | 103.704 | 31.698 | 17.9 | 103.675 | 31.724 | 18.3 | 103.704 | 31.750 | 18.3 | 0.00 | 0.00 | 0.00 | 0.00 | 0.00 | 0.00 |
| 1237 | 103.704 | 31.698 | 17.9 | 103.676 | 31.672 | 17.9 | 103.647 | 31.698 | 18.3 | 103.675 | 31.724 | 18.3 | 0.00 | 0.00 | 0.00 | 0.00 | 0.00 | 0.00 |
| 1238 | 103.676 | 31.672 | 17.9 | 103.647 | 31.646 | 17.9 | 103.618 | 31.672 | 18.3 | 103.647 | 31.698 | 18.3 | 0.00 | 0.00 | 0.00 | 0.00 | 0.00 | 0.00 |
| 1239 | 103.647 | 31.646 | 17.9 | 103.618 | 31.620 | 17.9 | 103.589 | 31.646 | 18.3 | 103.618 | 31.672 | 18.3 | 0.00 | 0.00 | 0.00 | 0.07 | 0.00 | 0.07 |
| 1240 | 103.618 | 31.620 | 17.9 | 103.589 | 31.594 | 17.9 | 103.560 | 31.620 | 18.3 | 103.589 | 31.646 | 18.3 | 0.20 | 0.00 | 0.20 | 0.11 | 0.00 | 0.11 |
| 1241 | 103.589 | 31.594 | 17.9 | 103.560 | 31.568 | 17.9 | 103.531 | 31.594 | 18.3 | 103.560 | 31.620 | 18.3 | 0.00 | 0.00 | 0.00 | 0.00 | 0.00 | 0.00 |
| 1242 | 103.560 | 31.568 | 17.9 | 103.531 | 31.542 | 17.9 | 103.502 | 31.568 | 18.3 | 103.531 | 31.594 | 18.3 | 0.00 | 0.00 | 0.00 | 0.00 | 0.00 | 0.00 |
| 1243 | 103.531 | 31.542 | 17.9 | 103.502 | 31.516 | 17.9 | 103.473 | 31.542 | 18.3 | 103.502 | 31.568 | 18.3 | 0.00 | 0.00 | 0.00 | 0.00 | 0.00 | 0.00 |
| 1244 | 103.502 | 31.516 | 17.9 | 103.474 | 31.491 | 17.9 | 103.444 | 31.516 | 18.3 | 103.473 | 31.542 | 18.3 | 0.00 | 0.00 | 0.00 | 0.00 | 0.00 | 0.00 |
| 1245 | 103.474 | 31.491 | 17.9 | 103.445 | 31.465 | 17.9 | 103.415 | 31.490 | 18.3 | 103.444 | 31.516 | 18.3 | 0.00 | 0.00 | 0.00 | 0.00 | 0.00 | 0.00 |
| 1246 | 103.445 | 31.465 | 17.9 | 103.416 | 31.439 | 17.9 | 103.387 | 31.464 | 18.3 | 103.415 | 31.490 | 18.3 | 0.00 | 0.01 | 0.01 | 0.00 | 0.01 | 0.01 |
| 1247 | 103.416 | 31.439 | 17.9 | 103.387 | 31.413 | 17.9 | 103.358 | 31.438 | 18.3 | 103.387 | 31.464 | 18.3 | 1.28 | 0.20 | 1.29 | 0.00 | 0.05 | 0.05 |
| 1248 | 103.387 | 31.413 | 17.9 | 103.358 | 31.387 | 17.9 | 103.329 | 31.412 | 18.3 | 103.358 | 31.438 | 18.3 | 0.00 | 0.38 | 0.38 | 0.00 | 0.09 | 0.09 |
| 1249 | 103.358 | 31.387 | 17.9 | 103.329 | 31.361 | 17.9 | 103.300 | 31.386 | 18.3 | 103.329 | 31.412 | 18.3 | 0.00 | 0.65 | 0.65 | 0.00 | 0.08 | 0.08 |
| 1250 | 103.329 | 31.361 | 17.9 | 103.300 | 31.335 | 17.9 | 103.271 | 31.360 | 18.3 | 103.300 | 31.386 | 18.3 | 0.00 | 0.97 | 0.97 | 0.00 | 0.07 | 0.07 |
| 1251 | 103.300 | 31.335 | 17.9 | 103.271 | 31.309 | 17.9 | 103.242 | 31.334 | 18.3 | 103.271 | 31.360 | 18.3 | 0.00 | 1.03 | 1.03 | 0.00 | 0.08 | 0.08 |
| 1252 | 103.271 | 31.309 | 17.9 | 103.243 | 31.283 | 17.9 | 103.213 | 31.309 | 18.3 | 103.242 | 31.334 | 18.3 | 0.00 | 0.83 | 0.83 | 0.00 | 0.08 | 0.08 |
| 1253 | 103.243 | 31.283 | 17.9 | 103.214 | 31.257 | 17.9 | 103.185 | 31.283 | 18.3 | 103.213 | 31.309 | 18.3 | 0.00 | 0.67 | 0.67 | 0.01 | 0.09 | 0.09 |
| 1254 | 103.214 | 31.257 | 17.9 | 103.185 | 31.231 | 17.9 | 103.156 | 31.257 | 18.3 | 103.185 | 31.283 | 18.3 | 0.00 | 0.95 | 0.95 | 0.00 | 0.14 | 0.14 |
| 1255 | 103.185 | 31.231 | 17.9 | 103.156 | 31.205 | 17.9 | 103.127 | 31.231 | 18.3 | 103.156 | 31.257 | 18.3 | 0.00 | 1.92 | 1.92 | 0.00 | 0.16 | 0.16 |
| 1256 | 103.156 | 31.205 | 17.9 | 103.127 | 31.179 | 17.9 | 103.098 | 31.205 | 18.3 | 103.127 | 31.231 | 18.3 | 0.00 | 2.99 | 2.99 | 0.00 | 0.13 | 0.13 |
| 1257 | 103.127 | 31.179 | 17.9 | 103.098 | 31.153 | 17.9 | 103.069 | 31.179 | 18.3 | 103.098 | 31.205 | 18.3 | 0.00 | 3.22 | 3.22 | 0.00 | 0.12 | 0.12 |
| 1258 | 103.098 | 31.153 | 17.9 | 103.069 | 31.127 | 17.9 | 103.040 | 31.153 | 18.3 | 103.069 | 31.179 | 18.3 | 0.00 | 2.08 | 2.08 | 0.00 | 0.18 | 0.18 |
| 1259 | 103.069 | 31.127 | 17.9 | 103.040 | 31.101 | 17.9 | 103.011 | 31.127 | 18.3 | 103.040 | 31.153 | 18.3 | 0.00 | 0.38 | 0.38 | 0.00 | 0.15 | 0.15 |
| 1260 | 103.040 | 31.101 | 17.9 | 103.011 | 31.075 | 17.9 | 102.983 | 31.101 | 18.3 | 103.011 | 31.127 | 18.3 | 0.00 | 0.00 | 0.00 | 0.00 | 0.00 | 0.00 |
| 1261 | 103.011 | 31.075 | 17.9 | 102.983 | 31.049 | 17.9 | 102.954 | 31.075 | 18.3 | 102.983 | 31.101 | 18.3 | 0.00 | 0.00 | 0.00 | 0.00 | 0.00 | 0.00 |
| 1262 | 102.983 | 31.049 | 17.9 | 102.954 | 31.023 | 17.9 | 102.925 | 31.049 | 18.3 | 102.954 | 31.075 | 18.3 | 0.00 | 0.00 | 0.00 | 0.00 | 0.00 | 0.00 |
| 1263 | 102.954 | 31.023 | 17.9 | 102.925 | 30.997 | 17.9 | 102.896 | 31.023 | 18.3 | 102.925 | 31.049 | 18.3 | 0.00 | 0.00 | 0.00 | 0.00 | 0.00 | 0.00 |

|      |         |        |      |         |        |      |         |        |      |         |        |      |      |      |      |      |      |      |
|------|---------|--------|------|---------|--------|------|---------|--------|------|---------|--------|------|------|------|------|------|------|------|
| 1264 | 102.925 | 30.997 | 17.9 | 102.896 | 30.971 | 17.9 | 102.867 | 30.997 | 18.3 | 102.896 | 31.023 | 18.3 | 0.00 | 0.00 | 0.00 | 0.00 | 0.00 | 0.00 |
| 1265 | 102.896 | 30.971 | 17.9 | 102.867 | 30.945 | 17.9 | 102.838 | 30.971 | 18.3 | 102.867 | 30.997 | 18.3 | 0.00 | 0.00 | 0.00 | 0.00 | 0.00 | 0.00 |
| 1266 | 102.867 | 30.945 | 17.9 | 102.838 | 30.919 | 17.9 | 102.809 | 30.945 | 18.3 | 102.838 | 30.971 | 18.3 | 0.98 | 0.00 | 0.98 | 0.14 | 0.00 | 0.14 |
| 1267 | 104.194 | 32.190 | 18.3 | 104.165 | 32.164 | 18.3 | 104.136 | 32.190 | 18.7 | 104.165 | 32.216 | 18.7 | 1.73 | 0.00 | 1.73 | 0.14 | 0.07 | 0.16 |
| 1268 | 104.165 | 32.164 | 18.3 | 104.136 | 32.138 | 18.3 | 104.107 | 32.164 | 18.7 | 104.136 | 32.190 | 18.7 | 0.00 | 0.28 | 0.28 | 0.00 | 0.09 | 0.09 |
| 1269 | 104.136 | 32.138 | 18.3 | 104.107 | 32.112 | 18.3 | 104.078 | 32.138 | 18.7 | 104.107 | 32.164 | 18.7 | 0.00 | 0.39 | 0.39 | 0.00 | 0.09 | 0.09 |
| 1270 | 104.107 | 32.112 | 18.3 | 104.078 | 32.086 | 18.3 | 104.049 | 32.112 | 18.7 | 104.078 | 32.138 | 18.7 | 0.00 | 0.23 | 0.23 | 0.00 | 0.06 | 0.06 |
| 1271 | 104.078 | 32.086 | 18.3 | 104.049 | 32.060 | 18.3 | 104.020 | 32.086 | 18.7 | 104.049 | 32.112 | 18.7 | 0.00 | 0.01 | 0.01 | 0.00 | 0.00 | 0.00 |
| 1272 | 104.049 | 32.060 | 18.3 | 104.021 | 32.034 | 18.3 | 103.992 | 32.060 | 18.7 | 104.020 | 32.086 | 18.7 | 0.00 | 0.00 | 0.00 | 0.00 | 0.00 | 0.00 |
| 1273 | 104.021 | 32.034 | 18.3 | 103.992 | 32.008 | 18.3 | 103.963 | 32.034 | 18.7 | 103.992 | 32.060 | 18.7 | 0.00 | 0.00 | 0.00 | 0.00 | 0.00 | 0.00 |
| 1274 | 103.992 | 32.008 | 18.3 | 103.963 | 31.982 | 18.3 | 103.934 | 32.008 | 18.7 | 103.963 | 32.034 | 18.7 | 0.00 | 0.00 | 0.00 | 0.00 | 0.00 | 0.00 |
| 1275 | 103.963 | 31.982 | 18.3 | 103.934 | 31.956 | 18.3 | 103.905 | 31.982 | 18.7 | 103.934 | 32.008 | 18.7 | 0.00 | 0.00 | 0.00 | 0.01 | 0.00 | 0.01 |
| 1276 | 103.934 | 31.956 | 18.3 | 103.905 | 31.930 | 18.3 | 103.876 | 31.956 | 18.7 | 103.905 | 31.982 | 18.7 | 0.00 | 0.00 | 0.00 | 0.07 | 0.00 | 0.07 |
| 1277 | 103.905 | 31.930 | 18.3 | 103.876 | 31.905 | 18.3 | 103.847 | 31.930 | 18.7 | 103.876 | 31.956 | 18.7 | 0.00 | 0.00 | 0.00 | 0.10 | 0.00 | 0.10 |
| 1278 | 103.876 | 31.905 | 18.3 | 103.847 | 31.879 | 18.3 | 103.818 | 31.904 | 18.7 | 103.847 | 31.930 | 18.7 | 0.78 | 0.00 | 0.78 | 0.09 | 0.00 | 0.09 |
| 1279 | 103.847 | 31.879 | 18.3 | 103.819 | 31.853 | 18.3 | 103.789 | 31.878 | 18.7 | 103.818 | 31.904 | 18.7 | 1.79 | 0.00 | 1.79 | 0.07 | 0.00 | 0.07 |
| 1280 | 103.819 | 31.853 | 18.3 | 103.790 | 31.827 | 18.3 | 103.760 | 31.852 | 18.7 | 103.789 | 31.878 | 18.7 | 2.00 | 0.00 | 2.00 | 0.13 | 0.00 | 0.13 |
| 1281 | 103.790 | 31.827 | 18.3 | 103.761 | 31.801 | 18.3 | 103.732 | 31.826 | 18.7 | 103.760 | 31.852 | 18.7 | 1.11 | 0.00 | 1.11 | 0.12 | 0.00 | 0.12 |
| 1282 | 103.761 | 31.801 | 18.3 | 103.732 | 31.775 | 18.3 | 103.703 | 31.801 | 18.7 | 103.732 | 31.826 | 18.7 | 0.08 | 0.00 | 0.08 | 0.00 | 0.00 | 0.00 |
| 1283 | 103.732 | 31.775 | 18.3 | 103.703 | 31.749 | 18.3 | 103.674 | 31.775 | 18.7 | 103.703 | 31.801 | 18.7 | 0.00 | 0.00 | 0.00 | 0.06 | 0.00 | 0.06 |
| 1284 | 103.703 | 31.749 | 18.3 | 103.674 | 31.723 | 18.3 | 103.645 | 31.749 | 18.7 | 103.674 | 31.775 | 18.7 | 0.00 | 0.00 | 0.00 | 0.00 | 0.00 | 0.00 |
| 1285 | 103.674 | 31.723 | 18.3 | 103.645 | 31.697 | 18.3 | 103.616 | 31.723 | 18.7 | 103.645 | 31.749 | 18.7 | 0.00 | 0.00 | 0.00 | 0.00 | 0.00 | 0.00 |
| 1286 | 103.645 | 31.697 | 18.3 | 103.616 | 31.671 | 18.3 | 103.587 | 31.697 | 18.7 | 103.616 | 31.723 | 18.7 | 0.00 | 0.00 | 0.00 | 0.00 | 0.00 | 0.00 |
| 1287 | 103.616 | 31.671 | 18.3 | 103.588 | 31.645 | 18.3 | 103.558 | 31.671 | 18.7 | 103.587 | 31.697 | 18.7 | 0.09 | 0.00 | 0.09 | 0.03 | 0.00 | 0.03 |
| 1288 | 103.588 | 31.645 | 18.3 | 103.559 | 31.619 | 18.3 | 103.529 | 31.645 | 18.7 | 103.558 | 31.671 | 18.7 | 0.20 | 0.00 | 0.20 | 0.07 | 0.00 | 0.07 |
| 1289 | 103.559 | 31.619 | 18.3 | 103.530 | 31.593 | 18.3 | 103.501 | 31.619 | 18.7 | 103.529 | 31.645 | 18.7 | 0.00 | 0.00 | 0.00 | 0.00 | 0.00 | 0.00 |
| 1290 | 103.530 | 31.593 | 18.3 | 103.501 | 31.567 | 18.3 | 103.472 | 31.593 | 18.7 | 103.501 | 31.619 | 18.7 | 0.00 | 0.00 | 0.00 | 0.00 | 0.00 | 0.00 |
| 1291 | 103.501 | 31.567 | 18.3 | 103.472 | 31.541 | 18.3 | 103.443 | 31.567 | 18.7 | 103.472 | 31.593 | 18.7 | 0.00 | 0.00 | 0.00 | 0.00 | 0.00 | 0.00 |
| 1292 | 103.472 | 31.541 | 18.3 | 103.443 | 31.515 | 18.3 | 103.414 | 31.541 | 18.7 | 103.443 | 31.567 | 18.7 | 0.15 | 0.00 | 0.15 | 0.00 | 0.00 | 0.00 |
| 1293 | 103.443 | 31.515 | 18.3 | 103.414 | 31.489 | 18.3 | 103.385 | 31.515 | 18.7 | 103.414 | 31.541 | 18.7 | 0.00 | 0.00 | 0.00 | 0.00 | 0.01 | 0.01 |
| 1294 | 103.414 | 31.489 | 18.3 | 103.385 | 31.463 | 18.3 | 103.356 | 31.489 | 18.7 | 103.385 | 31.515 | 18.7 | 0.00 | 0.27 | 0.27 | 0.00 | 0.08 | 0.08 |
| 1295 | 103.385 | 31.463 | 18.3 | 103.356 | 31.437 | 18.3 | 103.327 | 31.463 | 18.7 | 103.356 | 31.489 | 18.7 | 0.80 | 0.55 | 0.98 | 0.00 | 0.11 | 0.11 |
| 1296 | 103.356 | 31.437 | 18.3 | 103.328 | 31.411 | 18.3 | 103.299 | 31.437 | 18.7 | 103.327 | 31.463 | 18.7 | 0.00 | 0.39 | 0.39 | 0.00 | 0.08 | 0.08 |
| 1297 | 103.328 | 31.411 | 18.3 | 103.299 | 31.385 | 18.3 | 103.270 | 31.411 | 18.7 | 103.299 | 31.437 | 18.7 | 0.00 | 0.04 | 0.04 | 0.00 | 0.01 | 0.01 |
| 1298 | 103.299 | 31.385 | 18.3 | 103.270 | 31.359 | 18.3 | 103.241 | 31.385 | 18.7 | 103.270 | 31.411 | 18.7 | 0.00 | 0.00 | 0.00 | 0.00 | 0.00 | 0.00 |
| 1299 | 103.270 | 31.359 | 18.3 | 103.241 | 31.333 | 18.3 | 103.212 | 31.359 | 18.7 | 103.241 | 31.385 | 18.7 | 0.00 | 0.00 | 0.00 | 0.00 | 0.00 | 0.00 |
| 1300 | 103.241 | 31.333 | 18.3 | 103.212 | 31.308 | 18.3 | 103.183 | 31.333 | 18.7 | 103.212 | 31.359 | 18.7 | 0.00 | 0.00 | 0.00 | 0.00 | 0.00 | 0.00 |
| 1301 | 103.212 | 31.308 | 18.3 | 103.183 | 31.282 | 18.3 | 103.154 | 31.307 | 18.7 | 103.183 | 31.333 | 18.7 | 0.00 | 0.00 | 0.00 | 0.06 | 0.00 | 0.06 |
| 1302 | 103.183 | 31.282 | 18.3 | 103.154 | 31.256 | 18.3 | 103.125 | 31.281 | 18.7 | 103.154 | 31.307 | 18.7 | 0.00 | 0.23 | 0.23 | 0.09 | 0.08 | 0.12 |

|      |         |        |      |         |        |      |         |        |      |         |        |      |      |      |      |      |      |      |
|------|---------|--------|------|---------|--------|------|---------|--------|------|---------|--------|------|------|------|------|------|------|------|
| 1303 | 103.154 | 31.256 | 18.3 | 103.126 | 31.230 | 18.3 | 103.097 | 31.255 | 18.7 | 103.125 | 31.281 | 18.7 | 0.00 | 1.23 | 1.23 | 0.07 | 0.14 | 0.16 |
| 1304 | 103.126 | 31.230 | 18.3 | 103.097 | 31.204 | 18.3 | 103.068 | 31.229 | 18.7 | 103.097 | 31.255 | 18.7 | 0.00 | 2.35 | 2.35 | 0.00 | 0.13 | 0.13 |
| 1305 | 103.097 | 31.204 | 18.3 | 103.068 | 31.178 | 18.3 | 103.039 | 31.203 | 18.7 | 103.068 | 31.229 | 18.7 | 0.00 | 2.62 | 2.62 | 0.00 | 0.12 | 0.12 |
| 1306 | 103.068 | 31.178 | 18.3 | 103.039 | 31.152 | 18.3 | 103.010 | 31.177 | 18.7 | 103.039 | 31.203 | 18.7 | 0.00 | 1.66 | 1.66 | 0.00 | 0.15 | 0.15 |
| 1307 | 103.039 | 31.152 | 18.3 | 103.010 | 31.126 | 18.3 | 102.981 | 31.151 | 18.7 | 103.010 | 31.177 | 18.7 | 0.00 | 0.27 | 0.27 | 0.00 | 0.11 | 0.11 |
| 1308 | 103.010 | 31.126 | 18.3 | 102.981 | 31.100 | 18.3 | 102.952 | 31.125 | 18.7 | 102.981 | 31.151 | 18.7 | 0.00 | 0.00 | 0.00 | 0.00 | 0.00 | 0.00 |
| 1309 | 102.981 | 31.100 | 18.3 | 102.952 | 31.074 | 18.3 | 102.923 | 31.099 | 18.7 | 102.952 | 31.125 | 18.7 | 0.00 | 0.00 | 0.00 | 0.00 | 0.00 | 0.00 |
| 1310 | 102.952 | 31.074 | 18.3 | 102.924 | 31.048 | 18.3 | 102.894 | 31.073 | 18.7 | 102.923 | 31.099 | 18.7 | 0.00 | 0.00 | 0.00 | 0.00 | 0.00 | 0.00 |
| 1311 | 102.924 | 31.048 | 18.3 | 102.895 | 31.022 | 18.3 | 102.865 | 31.047 | 18.7 | 102.894 | 31.073 | 18.7 | 0.00 | 0.00 | 0.00 | 0.00 | 0.00 | 0.00 |
| 1312 | 102.895 | 31.022 | 18.3 | 102.866 | 30.996 | 18.3 | 102.837 | 31.022 | 18.7 | 102.865 | 31.047 | 18.7 | 0.00 | 0.00 | 0.00 | 0.00 | 0.00 | 0.00 |
| 1313 | 102.866 | 30.996 | 18.3 | 102.837 | 30.970 | 18.3 | 102.808 | 30.996 | 18.7 | 102.837 | 31.021 | 18.7 | 0.00 | 0.00 | 0.00 | 0.00 | 0.00 | 0.00 |
| 1314 | 102.837 | 30.970 | 18.3 | 102.808 | 30.944 | 18.3 | 102.779 | 30.970 | 18.7 | 102.808 | 30.996 | 18.7 | 1.00 | 0.00 | 1.00 | 0.03 | 0.00 | 0.03 |
| 1315 | 104.163 | 32.215 | 18.7 | 104.135 | 32.189 | 18.7 | 104.106 | 32.215 | 19.1 | 104.134 | 32.241 | 19.1 | 1.54 | 0.12 | 1.55 | 0.07 | 0.08 | 0.11 |
| 1316 | 104.135 | 32.189 | 18.7 | 104.106 | 32.163 | 18.7 | 104.077 | 32.189 | 19.1 | 104.106 | 32.215 | 19.1 | 0.00 | 0.49 | 0.49 | 0.00 | 0.09 | 0.09 |
| 1317 | 104.106 | 32.163 | 18.7 | 104.077 | 32.137 | 18.7 | 104.048 | 32.163 | 19.1 | 104.077 | 32.189 | 19.1 | 0.00 | 0.48 | 0.48 | 0.00 | 0.09 | 0.09 |
| 1318 | 104.077 | 32.137 | 18.7 | 104.048 | 32.111 | 18.7 | 104.019 | 32.137 | 19.1 | 104.048 | 32.163 | 19.1 | 0.00 | 0.16 | 0.16 | 0.00 | 0.03 | 0.03 |
| 1319 | 104.048 | 32.111 | 18.7 | 104.019 | 32.085 | 18.7 | 103.990 | 32.111 | 19.1 | 104.019 | 32.137 | 19.1 | 0.00 | 0.00 | 0.00 | 0.00 | 0.00 | 0.00 |
| 1320 | 104.019 | 32.085 | 18.7 | 103.990 | 32.059 | 18.7 | 103.961 | 32.085 | 19.1 | 103.990 | 32.111 | 19.1 | 0.00 | 0.00 | 0.00 | 0.00 | 0.00 | 0.00 |
| 1321 | 103.990 | 32.059 | 18.7 | 103.961 | 32.033 | 18.7 | 103.932 | 32.059 | 19.1 | 103.961 | 32.085 | 19.1 | 0.00 | 0.00 | 0.00 | 0.00 | 0.00 | 0.00 |
| 1322 | 103.961 | 32.033 | 18.7 | 103.932 | 32.007 | 18.7 | 103.903 | 32.033 | 19.1 | 103.932 | 32.059 | 19.1 | 0.00 | 0.00 | 0.00 | 0.01 | 0.00 | 0.01 |
| 1323 | 103.932 | 32.007 | 18.7 | 103.904 | 31.981 | 18.7 | 103.874 | 32.007 | 19.1 | 103.903 | 32.033 | 19.1 | 0.00 | 0.00 | 0.00 | 0.04 | 0.00 | 0.04 |
| 1324 | 103.904 | 31.981 | 18.7 | 103.875 | 31.955 | 18.7 | 103.846 | 31.981 | 19.1 | 103.874 | 32.007 | 19.1 | 0.00 | 0.00 | 0.00 | 0.07 | 0.00 | 0.07 |
| 1325 | 103.875 | 31.955 | 18.7 | 103.846 | 31.929 | 18.7 | 103.817 | 31.955 | 19.1 | 103.846 | 31.981 | 19.1 | 0.00 | 0.00 | 0.00 | 0.06 | 0.00 | 0.06 |
| 1326 | 103.846 | 31.929 | 18.7 | 103.817 | 31.903 | 18.7 | 103.788 | 31.929 | 19.1 | 103.817 | 31.955 | 19.1 | 0.18 | 0.00 | 0.18 | 0.02 | 0.00 | 0.02 |
| 1327 | 103.817 | 31.903 | 18.7 | 103.788 | 31.877 | 18.7 | 103.759 | 31.903 | 19.1 | 103.788 | 31.929 | 19.1 | 0.57 | 0.00 | 0.57 | 0.00 | 0.00 | 0.00 |
| 1328 | 103.788 | 31.877 | 18.7 | 103.759 | 31.851 | 18.7 | 103.730 | 31.877 | 19.1 | 103.759 | 31.903 | 19.1 | 0.74 | 0.00 | 0.74 | 0.07 | 0.00 | 0.07 |
| 1329 | 103.759 | 31.851 | 18.7 | 103.730 | 31.826 | 18.7 | 103.701 | 31.851 | 19.1 | 103.730 | 31.877 | 19.1 | 0.53 | 0.00 | 0.53 | 0.08 | 0.00 | 0.08 |
| 1330 | 103.730 | 31.826 | 18.7 | 103.701 | 31.799 | 18.7 | 103.672 | 31.825 | 19.1 | 103.701 | 31.851 | 19.1 | 0.21 | 0.00 | 0.21 | 0.01 | 0.00 | 0.01 |
| 1331 | 103.701 | 31.799 | 18.7 | 103.673 | 31.773 | 18.7 | 103.644 | 31.799 | 19.1 | 103.672 | 31.825 | 19.1 | 0.10 | 0.00 | 0.10 | 0.05 | 0.00 | 0.05 |
| 1332 | 103.673 | 31.773 | 18.7 | 103.644 | 31.747 | 18.7 | 103.615 | 31.773 | 19.1 | 103.644 | 31.799 | 19.1 | 0.00 | 0.00 | 0.00 | 0.00 | 0.00 | 0.00 |
| 1333 | 103.644 | 31.747 | 18.7 | 103.615 | 31.722 | 18.7 | 103.586 | 31.747 | 19.1 | 103.615 | 31.773 | 19.1 | 0.00 | 0.00 | 0.00 | 0.00 | 0.00 | 0.00 |
| 1334 | 103.615 | 31.722 | 18.7 | 103.586 | 31.696 | 18.7 | 103.557 | 31.721 | 19.1 | 103.586 | 31.747 | 19.1 | 0.07 | 0.00 | 0.07 | 0.00 | 0.00 | 0.00 |
| 1335 | 103.586 | 31.696 | 18.7 | 103.557 | 31.670 | 18.7 | 103.528 | 31.695 | 19.1 | 103.557 | 31.721 | 19.1 | 0.30 | 0.00 | 0.30 | 0.03 | 0.00 | 0.03 |
| 1336 | 103.557 | 31.670 | 18.7 | 103.528 | 31.644 | 18.7 | 103.499 | 31.669 | 19.1 | 103.528 | 31.695 | 19.1 | 0.32 | 0.00 | 0.32 | 0.05 | 0.00 | 0.05 |
| 1337 | 103.528 | 31.644 | 18.7 | 103.499 | 31.618 | 18.7 | 103.470 | 31.643 | 19.1 | 103.499 | 31.669 | 19.1 | 0.00 | 0.00 | 0.00 | 0.00 | 0.00 | 0.00 |
| 1338 | 103.499 | 31.618 | 18.7 | 103.471 | 31.592 | 18.7 | 103.441 | 31.617 | 19.1 | 103.470 | 31.643 | 19.1 | 0.00 | 0.00 | 0.00 | 0.00 | 0.00 | 0.00 |
| 1339 | 103.471 | 31.592 | 18.7 | 103.442 | 31.566 | 18.7 | 103.412 | 31.591 | 19.1 | 103.441 | 31.617 | 19.1 | 0.00 | 0.00 | 0.00 | 0.00 | 0.00 | 0.00 |
| 1340 | 103.442 | 31.566 | 18.7 | 103.413 | 31.540 | 18.7 | 103.384 | 31.566 | 19.1 | 103.412 | 31.591 | 19.1 | 0.30 | 0.00 | 0.30 | 0.00 | 0.00 | 0.00 |
| 1341 | 103.413 | 31.540 | 18.7 | 103.384 | 31.514 | 18.7 | 103.355 | 31.540 | 19.1 | 103.384 | 31.566 | 19.1 | 0.00 | 0.00 | 0.00 | 0.00 | 0.05 | 0.05 |

|      |         |        |      |         |        |      |         |        |      |         |        |      |      |      |      |      |      |      |
|------|---------|--------|------|---------|--------|------|---------|--------|------|---------|--------|------|------|------|------|------|------|------|
| 1342 | 103.384 | 31.514 | 18.7 | 103.355 | 31.488 | 18.7 | 103.326 | 31.514 | 19.1 | 103.355 | 31.540 | 19.1 | 0.00 | 0.51 | 0.51 | 0.00 | 0.13 | 0.13 |
| 1343 | 103.355 | 31.488 | 18.7 | 103.326 | 31.462 | 18.7 | 103.297 | 31.488 | 19.1 | 103.326 | 31.514 | 19.1 | 0.38 | 0.89 | 0.97 | 0.00 | 0.14 | 0.14 |
| 1344 | 103.326 | 31.462 | 18.7 | 103.297 | 31.436 | 18.7 | 103.268 | 31.462 | 19.1 | 103.297 | 31.488 | 19.1 | 0.00 | 0.65 | 0.65 | 0.00 | 0.11 | 0.11 |
| 1345 | 103.297 | 31.436 | 18.7 | 103.268 | 31.410 | 18.7 | 103.239 | 31.436 | 19.1 | 103.268 | 31.462 | 19.1 | 0.00 | 0.09 | 0.09 | 0.00 | 0.05 | 0.05 |
| 1346 | 103.268 | 31.410 | 18.7 | 103.240 | 31.384 | 18.7 | 103.210 | 31.410 | 19.1 | 103.239 | 31.436 | 19.1 | 0.00 | 0.00 | 0.00 | 0.00 | 0.00 | 0.00 |
| 1347 | 103.240 | 31.384 | 18.7 | 103.211 | 31.358 | 18.7 | 103.182 | 31.384 | 19.1 | 103.210 | 31.410 | 19.1 | 0.00 | 0.00 | 0.00 | 0.00 | 0.00 | 0.00 |
| 1348 | 103.211 | 31.358 | 18.7 | 103.182 | 31.332 | 18.7 | 103.153 | 31.358 | 19.1 | 103.182 | 31.384 | 19.1 | 0.00 | 0.00 | 0.00 | 0.01 | 0.00 | 0.01 |
| 1349 | 103.182 | 31.332 | 18.7 | 103.153 | 31.306 | 18.7 | 103.124 | 31.332 | 19.1 | 103.153 | 31.358 | 19.1 | 0.06 | 0.00 | 0.06 | 0.09 | 0.00 | 0.09 |
| 1350 | 103.153 | 31.306 | 18.7 | 103.124 | 31.280 | 18.7 | 103.095 | 31.306 | 19.1 | 103.124 | 31.332 | 19.1 | 0.05 | 0.00 | 0.05 | 0.15 | 0.01 | 0.15 |
| 1351 | 103.124 | 31.280 | 18.7 | 103.095 | 31.254 | 18.7 | 103.066 | 31.280 | 19.1 | 103.095 | 31.306 | 19.1 | 0.00 | 0.60 | 0.60 | 0.14 | 0.10 | 0.17 |
| 1352 | 103.095 | 31.254 | 18.7 | 103.066 | 31.228 | 18.7 | 103.037 | 31.254 | 19.1 | 103.066 | 31.280 | 19.1 | 0.00 | 1.33 | 1.33 | 0.04 | 0.13 | 0.14 |
| 1353 | 103.066 | 31.228 | 18.7 | 103.037 | 31.202 | 18.7 | 103.008 | 31.228 | 19.1 | 103.037 | 31.254 | 19.1 | 0.00 | 1.46 | 1.46 | 0.00 | 0.13 | 0.13 |
| 1354 | 103.037 | 31.202 | 18.7 | 103.009 | 31.176 | 18.7 | 102.980 | 31.202 | 19.1 | 103.008 | 31.228 | 19.1 | 0.00 | 0.80 | 0.80 | 0.00 | 0.11 | 0.11 |
| 1355 | 103.009 | 31.176 | 18.7 | 102.980 | 31.150 | 18.7 | 102.951 | 31.176 | 19.1 | 102.980 | 31.202 | 19.1 | 0.00 | 0.00 | 0.00 | 0.00 | 0.02 | 0.02 |
| 1356 | 102.980 | 31.150 | 18.7 | 102.951 | 31.124 | 18.7 | 102.922 | 31.150 | 19.1 | 102.951 | 31.176 | 19.1 | 0.00 | 0.00 | 0.00 | 0.00 | 0.00 | 0.00 |
| 1357 | 102.951 | 31.124 | 18.7 | 102.922 | 31.098 | 18.7 | 102.893 | 31.124 | 19.1 | 102.922 | 31.150 | 19.1 | 0.00 | 0.00 | 0.00 | 0.00 | 0.00 | 0.00 |
| 1358 | 102.922 | 31.098 | 18.7 | 102.893 | 31.072 | 18.7 | 102.864 | 31.098 | 19.1 | 102.893 | 31.124 | 19.1 | 0.00 | 0.00 | 0.00 | 0.00 | 0.00 | 0.00 |
| 1359 | 102.893 | 31.072 | 18.7 | 102.864 | 31.046 | 18.7 | 102.835 | 31.072 | 19.1 | 102.864 | 31.098 | 19.1 | 0.00 | 0.00 | 0.00 | 0.00 | 0.00 | 0.00 |
| 1360 | 102.864 | 31.046 | 18.7 | 102.835 | 31.020 | 18.7 | 102.806 | 31.046 | 19.1 | 102.835 | 31.072 | 19.1 | 0.00 | 0.00 | 0.00 | 0.00 | 0.00 | 0.00 |
| 1361 | 102.835 | 31.020 | 18.7 | 102.806 | 30.994 | 18.7 | 102.777 | 31.020 | 19.1 | 102.806 | 31.046 | 19.1 | 0.00 | 0.00 | 0.00 | 0.00 | 0.00 | 0.00 |
| 1362 | 102.806 | 30.994 | 18.7 | 102.778 | 30.968 | 18.7 | 102.749 | 30.994 | 19.1 | 102.777 | 31.020 | 19.1 | 1.00 | 0.00 | 1.00 | 0.01 | 0.00 | 0.01 |
| 1363 | 104.133 | 32.240 | 19.1 | 104.104 | 32.214 | 19.1 | 104.075 | 32.240 | 19.5 | 104.104 | 32.266 | 19.5 | 1.00 | 0.35 | 1.06 | 0.00 | 0.08 | 0.08 |
| 1364 | 104.104 | 32.214 | 19.1 | 104.075 | 32.188 | 19.1 | 104.046 | 32.214 | 19.5 | 104.075 | 32.240 | 19.5 | 0.00 | 0.83 | 0.83 | 0.00 | 0.07 | 0.07 |
| 1365 | 104.075 | 32.188 | 19.1 | 104.046 | 32.162 | 19.1 | 104.017 | 32.188 | 19.5 | 104.046 | 32.214 | 19.5 | 0.00 | 0.81 | 0.81 | 0.00 | 0.10 | 0.10 |
| 1366 | 104.046 | 32.162 | 19.1 | 104.017 | 32.136 | 19.1 | 103.988 | 32.162 | 19.5 | 104.017 | 32.188 | 19.5 | 0.00 | 0.34 | 0.34 | 0.00 | 0.08 | 0.08 |
| 1367 | 104.017 | 32.136 | 19.1 | 103.989 | 32.110 | 19.1 | 103.960 | 32.136 | 19.5 | 103.988 | 32.162 | 19.5 | 0.00 | 0.00 | 0.00 | 0.05 | 0.00 | 0.05 |
| 1368 | 103.989 | 32.110 | 19.1 | 103.960 | 32.084 | 19.1 | 103.931 | 32.110 | 19.5 | 103.960 | 32.136 | 19.5 | 0.00 | 0.00 | 0.00 | 0.08 | 0.00 | 0.08 |
| 1369 | 103.960 | 32.084 | 19.1 | 103.931 | 32.058 | 19.1 | 103.902 | 32.084 | 19.5 | 103.931 | 32.110 | 19.5 | 0.00 | 0.00 | 0.00 | 0.08 | 0.00 | 0.08 |
| 1370 | 103.931 | 32.058 | 19.1 | 103.902 | 32.032 | 19.1 | 103.873 | 32.058 | 19.5 | 103.902 | 32.084 | 19.5 | 0.00 | 0.00 | 0.00 | 0.07 | 0.00 | 0.07 |
| 1371 | 103.902 | 32.032 | 19.1 | 103.873 | 32.006 | 19.1 | 103.844 | 32.032 | 19.5 | 103.873 | 32.058 | 19.5 | 0.00 | 0.00 | 0.00 | 0.08 | 0.00 | 0.08 |
| 1372 | 103.873 | 32.006 | 19.1 | 103.844 | 31.980 | 19.1 | 103.815 | 32.006 | 19.5 | 103.844 | 32.032 | 19.5 | 0.00 | 0.00 | 0.00 | 0.10 | 0.00 | 0.10 |
| 1373 | 103.844 | 31.980 | 19.1 | 103.815 | 31.954 | 19.1 | 103.786 | 31.980 | 19.5 | 103.815 | 32.006 | 19.5 | 0.00 | 0.00 | 0.00 | 0.08 | 0.00 | 0.08 |
| 1374 | 103.815 | 31.954 | 19.1 | 103.787 | 31.928 | 19.1 | 103.757 | 31.954 | 19.5 | 103.786 | 31.980 | 19.5 | 0.00 | 0.00 | 0.00 | 0.02 | 0.00 | 0.02 |
| 1375 | 103.787 | 31.928 | 19.1 | 103.758 | 31.902 | 19.1 | 103.729 | 31.928 | 19.5 | 103.757 | 31.954 | 19.5 | 0.07 | 0.00 | 0.07 | 0.00 | 0.00 | 0.00 |
| 1376 | 103.758 | 31.902 | 19.1 | 103.729 | 31.876 | 19.1 | 103.700 | 31.902 | 19.5 | 103.729 | 31.928 | 19.5 | 0.22 | 0.00 | 0.22 | 0.00 | 0.00 | 0.00 |
| 1377 | 103.729 | 31.876 | 19.1 | 103.700 | 31.850 | 19.1 | 103.671 | 31.876 | 19.5 | 103.700 | 31.902 | 19.5 | 0.37 | 0.00 | 0.37 | 0.04 | 0.00 | 0.04 |
| 1378 | 103.700 | 31.850 | 19.1 | 103.671 | 31.824 | 19.1 | 103.642 | 31.850 | 19.5 | 103.671 | 31.876 | 19.5 | 0.43 | 0.00 | 0.43 | 0.02 | 0.00 | 0.02 |
| 1379 | 103.671 | 31.824 | 19.1 | 103.642 | 31.798 | 19.1 | 103.613 | 31.824 | 19.5 | 103.642 | 31.850 | 19.5 | 0.33 | 0.00 | 0.33 | 0.00 | 0.00 | 0.00 |
| 1380 | 103.642 | 31.798 | 19.1 | 103.613 | 31.772 | 19.1 | 103.584 | 31.798 | 19.5 | 103.613 | 31.824 | 19.5 | 0.12 | 0.00 | 0.12 | 0.00 | 0.00 | 0.00 |

|      |         |        |      |         |        |      |         |        |      |         |        |      |      |      |      |      |      |      |
|------|---------|--------|------|---------|--------|------|---------|--------|------|---------|--------|------|------|------|------|------|------|------|
| 1381 | 103.613 | 31.772 | 19.1 | 103.584 | 31.746 | 19.1 | 103.555 | 31.772 | 19.5 | 103.584 | 31.798 | 19.5 | 0.03 | 0.00 | 0.03 | 0.00 | 0.00 | 0.00 |
| 1382 | 103.584 | 31.746 | 19.1 | 103.556 | 31.720 | 19.1 | 103.526 | 31.746 | 19.5 | 103.555 | 31.772 | 19.5 | 0.13 | 0.00 | 0.13 | 0.00 | 0.00 | 0.00 |
| 1383 | 103.556 | 31.720 | 19.1 | 103.527 | 31.694 | 19.1 | 103.498 | 31.720 | 19.5 | 103.526 | 31.746 | 19.5 | 0.33 | 0.00 | 0.33 | 0.02 | 0.00 | 0.02 |
| 1384 | 103.527 | 31.694 | 19.1 | 103.498 | 31.668 | 19.1 | 103.469 | 31.694 | 19.5 | 103.498 | 31.720 | 19.5 | 0.29 | 0.00 | 0.29 | 0.03 | 0.00 | 0.03 |
| 1385 | 103.498 | 31.668 | 19.1 | 103.469 | 31.642 | 19.1 | 103.440 | 31.668 | 19.5 | 103.469 | 31.694 | 19.5 | 0.00 | 0.00 | 0.00 | 0.00 | 0.00 | 0.00 |
| 1386 | 103.469 | 31.642 | 19.1 | 103.440 | 31.616 | 19.1 | 103.411 | 31.642 | 19.5 | 103.440 | 31.668 | 19.5 | 0.00 | 0.00 | 0.00 | 0.00 | 0.00 | 0.00 |
| 1387 | 103.440 | 31.616 | 19.1 | 103.411 | 31.590 | 19.1 | 103.382 | 31.616 | 19.5 | 103.411 | 31.642 | 19.5 | 0.00 | 0.00 | 0.00 | 0.00 | 0.00 | 0.00 |
| 1388 | 103.411 | 31.590 | 19.1 | 103.382 | 31.564 | 19.1 | 103.353 | 31.590 | 19.5 | 103.382 | 31.616 | 19.5 | 0.39 | 0.00 | 0.39 | 0.00 | 0.00 | 0.00 |
| 1389 | 103.382 | 31.564 | 19.1 | 103.353 | 31.538 | 19.1 | 103.324 | 31.564 | 19.5 | 103.353 | 31.590 | 19.5 | 0.00 | 0.00 | 0.00 | 0.00 | 0.05 | 0.05 |
| 1390 | 103.353 | 31.538 | 19.1 | 103.325 | 31.512 | 19.1 | 103.296 | 31.538 | 19.5 | 103.324 | 31.564 | 19.5 | 0.00 | 0.54 | 0.54 | 0.00 | 0.14 | 0.14 |
| 1391 | 103.325 | 31.512 | 19.1 | 103.296 | 31.486 | 19.1 | 103.267 | 31.512 | 19.5 | 103.296 | 31.538 | 19.5 | 0.08 | 1.10 | 1.11 | 0.00 | 0.15 | 0.15 |
| 1392 | 103.296 | 31.486 | 19.1 | 103.267 | 31.461 | 19.1 | 103.238 | 31.486 | 19.5 | 103.267 | 31.512 | 19.5 | 0.00 | 1.13 | 1.13 | 0.00 | 0.12 | 0.12 |
| 1393 | 103.267 | 31.461 | 19.1 | 103.238 | 31.435 | 19.1 | 103.209 | 31.460 | 19.5 | 103.238 | 31.486 | 19.5 | 0.00 | 0.72 | 0.72 | 0.00 | 0.11 | 0.11 |
| 1394 | 103.238 | 31.435 | 19.1 | 103.209 | 31.409 | 19.1 | 103.180 | 31.434 | 19.5 | 103.209 | 31.460 | 19.5 | 0.00 | 0.37 | 0.37 | 0.00 | 0.09 | 0.09 |
| 1395 | 103.209 | 31.409 | 19.1 | 103.180 | 31.383 | 19.1 | 103.151 | 31.408 | 19.5 | 103.180 | 31.434 | 19.5 | 0.00 | 0.15 | 0.15 | 0.00 | 0.07 | 0.07 |
| 1396 | 103.180 | 31.383 | 19.1 | 103.151 | 31.357 | 19.1 | 103.122 | 31.382 | 19.5 | 103.151 | 31.408 | 19.5 | 0.00 | 0.04 | 0.04 | 0.01 | 0.03 | 0.03 |
| 1397 | 103.151 | 31.357 | 19.1 | 103.123 | 31.331 | 19.1 | 103.094 | 31.356 | 19.5 | 103.122 | 31.382 | 19.5 | 0.08 | 0.00 | 0.08 | 0.09 | 0.01 | 0.09 |
| 1398 | 103.123 | 31.331 | 19.1 | 103.094 | 31.305 | 19.1 | 103.065 | 31.330 | 19.5 | 103.094 | 31.356 | 19.5 | 0.06 | 0.00 | 0.06 | 0.15 | 0.00 | 0.15 |
| 1399 | 103.094 | 31.305 | 19.1 | 103.065 | 31.279 | 19.1 | 103.036 | 31.304 | 19.5 | 103.065 | 31.330 | 19.5 | 0.00 | 0.21 | 0.21 | 0.15 | 0.08 | 0.17 |
| 1400 | 103.065 | 31.279 | 19.1 | 103.036 | 31.253 | 19.1 | 103.007 | 31.278 | 19.5 | 103.036 | 31.304 | 19.5 | 0.00 | 0.48 | 0.48 | 0.07 | 0.10 | 0.12 |
| 1401 | 103.036 | 31.253 | 19.1 | 103.007 | 31.227 | 19.1 | 102.978 | 31.253 | 19.5 | 103.007 | 31.278 | 19.5 | 0.00 | 0.47 | 0.47 | 0.00 | 0.11 | 0.11 |
| 1402 | 103.007 | 31.227 | 19.1 | 102.978 | 31.201 | 19.1 | 102.949 | 31.227 | 19.5 | 102.978 | 31.252 | 19.5 | 0.00 | 0.18 | 0.18 | 0.00 | 0.08 | 0.08 |
| 1403 | 102.978 | 31.201 | 19.1 | 102.949 | 31.175 | 19.1 | 102.920 | 31.201 | 19.5 | 102.949 | 31.227 | 19.5 | 0.00 | 0.00 | 0.00 | 0.00 | 0.00 | 0.00 |
| 1404 | 102.949 | 31.175 | 19.1 | 102.921 | 31.149 | 19.1 | 102.891 | 31.174 | 19.5 | 102.920 | 31.201 | 19.5 | 0.00 | 0.00 | 0.00 | 0.00 | 0.00 | 0.00 |
| 1405 | 102.921 | 31.149 | 19.1 | 102.892 | 31.123 | 19.1 | 102.862 | 31.148 | 19.5 | 102.891 | 31.174 | 19.5 | 0.00 | 0.00 | 0.00 | 0.00 | 0.00 | 0.00 |
| 1406 | 102.892 | 31.123 | 19.1 | 102.863 | 31.097 | 19.1 | 102.834 | 31.122 | 19.5 | 102.862 | 31.148 | 19.5 | 0.00 | 0.00 | 0.00 | 0.00 | 0.00 | 0.00 |
| 1407 | 102.863 | 31.097 | 19.1 | 102.834 | 31.071 | 19.1 | 102.805 | 31.097 | 19.5 | 102.834 | 31.122 | 19.5 | 0.00 | 0.00 | 0.00 | 0.00 | 0.00 | 0.00 |
| 1408 | 102.834 | 31.071 | 19.1 | 102.805 | 31.045 | 19.1 | 102.776 | 31.071 | 19.5 | 102.805 | 31.097 | 19.5 | 0.00 | 0.00 | 0.00 | 0.00 | 0.01 | 0.01 |
| 1409 | 102.805 | 31.045 | 19.1 | 102.776 | 31.019 | 19.1 | 102.747 | 31.045 | 19.5 | 102.776 | 31.071 | 19.5 | 0.00 | 0.31 | 0.31 | 0.00 | 0.08 | 0.08 |
| 1410 | 102.776 | 31.019 | 19.1 | 102.747 | 30.993 | 19.1 | 102.718 | 31.019 | 19.5 | 102.747 | 31.045 | 19.5 | 1.00 | 0.65 | 1.19 | 0.00 | 0.12 | 0.12 |
| 1411 | 104.103 | 32.265 | 19.5 | 104.074 | 32.239 | 19.5 | 104.045 | 32.264 | 19.9 | 104.073 | 32.291 | 19.9 | 1.00 | 0.82 | 1.29 | 0.00 | 0.08 | 0.08 |
| 1412 | 104.074 | 32.239 | 19.5 | 104.045 | 32.213 | 19.5 | 104.016 | 32.239 | 19.9 | 104.045 | 32.264 | 19.9 | 0.00 | 1.00 | 1.00 | 0.00 | 0.01 | 0.01 |
| 1413 | 104.045 | 32.213 | 19.5 | 104.016 | 32.187 | 19.5 | 103.987 | 32.213 | 19.9 | 104.016 | 32.239 | 19.9 | 0.00 | 0.97 | 0.97 | 0.00 | 0.10 | 0.10 |
| 1414 | 104.016 | 32.187 | 19.5 | 103.987 | 32.161 | 19.5 | 103.958 | 32.187 | 19.9 | 103.987 | 32.213 | 19.9 | 0.00 | 0.47 | 0.47 | 0.03 | 0.11 | 0.11 |
| 1415 | 103.987 | 32.161 | 19.5 | 103.958 | 32.135 | 19.5 | 103.929 | 32.161 | 19.9 | 103.958 | 32.187 | 19.9 | 0.01 | 0.01 | 0.02 | 0.11 | 0.01 | 0.11 |
| 1416 | 103.958 | 32.135 | 19.5 | 103.929 | 32.109 | 19.5 | 103.900 | 32.135 | 19.9 | 103.929 | 32.161 | 19.9 | 0.15 | 0.00 | 0.15 | 0.13 | 0.00 | 0.13 |
| 1417 | 103.929 | 32.109 | 19.5 | 103.900 | 32.083 | 19.5 | 103.871 | 32.109 | 19.9 | 103.900 | 32.135 | 19.9 | 0.24 | 0.00 | 0.24 | 0.13 | 0.00 | 0.13 |
| 1418 | 103.900 | 32.083 | 19.5 | 103.872 | 32.057 | 19.5 | 103.843 | 32.083 | 19.9 | 103.871 | 32.109 | 19.9 | 0.24 | 0.00 | 0.24 | 0.11 | 0.00 | 0.11 |
| 1419 | 103.872 | 32.057 | 19.5 | 103.843 | 32.031 | 19.5 | 103.814 | 32.057 | 19.9 | 103.843 | 32.083 | 19.9 | 0.22 | 0.00 | 0.22 | 0.11 | 0.00 | 0.11 |

|      |         |        |      |         |        |      |         |        |      |         |        |      |      |      |      |      |      |      |
|------|---------|--------|------|---------|--------|------|---------|--------|------|---------|--------|------|------|------|------|------|------|------|
| 1420 | 103.843 | 32.031 | 19.5 | 103.814 | 32.005 | 19.5 | 103.785 | 32.031 | 19.9 | 103.814 | 32.057 | 19.9 | 0.22 | 0.00 | 0.22 | 0.11 | 0.00 | 0.11 |
| 1421 | 103.814 | 32.005 | 19.5 | 103.785 | 31.979 | 19.5 | 103.756 | 32.005 | 19.9 | 103.785 | 32.031 | 19.9 | 0.22 | 0.00 | 0.22 | 0.09 | 0.00 | 0.09 |
| 1422 | 103.785 | 31.979 | 19.5 | 103.756 | 31.953 | 19.5 | 103.727 | 31.979 | 19.9 | 103.756 | 32.005 | 19.9 | 0.18 | 0.00 | 0.18 | 0.02 | 0.00 | 0.02 |
| 1423 | 103.756 | 31.953 | 19.5 | 103.727 | 31.927 | 19.5 | 103.698 | 31.953 | 19.9 | 103.727 | 31.979 | 19.9 | 0.14 | 0.00 | 0.14 | 0.00 | 0.00 | 0.00 |
| 1424 | 103.727 | 31.927 | 19.5 | 103.698 | 31.901 | 19.5 | 103.669 | 31.927 | 19.9 | 103.698 | 31.953 | 19.9 | 0.21 | 0.00 | 0.21 | 0.00 | 0.00 | 0.00 |
| 1425 | 103.698 | 31.901 | 19.5 | 103.669 | 31.875 | 19.5 | 103.640 | 31.901 | 19.9 | 103.669 | 31.927 | 19.9 | 0.36 | 0.00 | 0.36 | 0.07 | 0.00 | 0.07 |
| 1426 | 103.669 | 31.875 | 19.5 | 103.641 | 31.849 | 19.5 | 103.612 | 31.875 | 19.9 | 103.640 | 31.901 | 19.9 | 0.43 | 0.00 | 0.43 | 0.06 | 0.00 | 0.06 |
| 1427 | 103.641 | 31.849 | 19.5 | 103.612 | 31.823 | 19.5 | 103.583 | 31.849 | 19.9 | 103.612 | 31.875 | 19.9 | 0.30 | 0.00 | 0.30 | 0.00 | 0.00 | 0.00 |
| 1428 | 103.612 | 31.823 | 19.5 | 103.583 | 31.797 | 19.5 | 103.554 | 31.823 | 19.9 | 103.583 | 31.849 | 19.9 | 0.10 | 0.00 | 0.10 | 0.00 | 0.00 | 0.00 |
| 1429 | 103.583 | 31.797 | 19.5 | 103.554 | 31.771 | 19.5 | 103.525 | 31.797 | 19.9 | 103.554 | 31.823 | 19.9 | 0.00 | 0.00 | 0.00 | 0.00 | 0.00 | 0.00 |
| 1430 | 103.554 | 31.771 | 19.5 | 103.525 | 31.745 | 19.5 | 103.496 | 31.771 | 19.9 | 103.525 | 31.797 | 19.9 | 0.03 | 0.00 | 0.03 | 0.00 | 0.00 | 0.00 |
| 1431 | 103.525 | 31.745 | 19.5 | 103.496 | 31.719 | 19.5 | 103.467 | 31.745 | 19.9 | 103.496 | 31.771 | 19.9 | 0.12 | 0.00 | 0.12 | 0.00 | 0.00 | 0.00 |
| 1432 | 103.496 | 31.719 | 19.5 | 103.467 | 31.693 | 19.5 | 103.438 | 31.719 | 19.9 | 103.467 | 31.745 | 19.9 | 0.10 | 0.00 | 0.10 | 0.00 | 0.00 | 0.00 |
| 1433 | 103.467 | 31.693 | 19.5 | 103.439 | 31.667 | 19.5 | 103.409 | 31.693 | 19.9 | 103.438 | 31.719 | 19.9 | 0.00 | 0.00 | 0.00 | 0.00 | 0.00 | 0.00 |
| 1434 | 103.439 | 31.667 | 19.5 | 103.410 | 31.641 | 19.5 | 103.381 | 31.667 | 19.9 | 103.409 | 31.693 | 19.9 | 0.00 | 0.00 | 0.00 | 0.00 | 0.00 | 0.00 |
| 1435 | 103.410 | 31.641 | 19.5 | 103.381 | 31.615 | 19.5 | 103.352 | 31.641 | 19.9 | 103.381 | 31.667 | 19.9 | 0.00 | 0.00 | 0.00 | 0.00 | 0.00 | 0.00 |
| 1436 | 103.381 | 31.615 | 19.5 | 103.352 | 31.589 | 19.5 | 103.323 | 31.615 | 19.9 | 103.352 | 31.641 | 19.9 | 0.43 | 0.00 | 0.43 | 0.00 | 0.00 | 0.00 |
| 1437 | 103.352 | 31.589 | 19.5 | 103.323 | 31.563 | 19.5 | 103.294 | 31.589 | 19.9 | 103.323 | 31.615 | 19.9 | 0.00 | 0.00 | 0.00 | 0.00 | 0.00 | 0.00 |
| 1438 | 103.323 | 31.563 | 19.5 | 103.294 | 31.537 | 19.5 | 103.265 | 31.563 | 19.9 | 103.294 | 31.589 | 19.9 | 0.00 | 0.33 | 0.33 | 0.00 | 0.10 | 0.10 |
| 1439 | 103.294 | 31.537 | 19.5 | 103.265 | 31.511 | 19.5 | 103.236 | 31.537 | 19.9 | 103.265 | 31.563 | 19.9 | 0.00 | 1.00 | 1.00 | 0.00 | 0.13 | 0.13 |
| 1440 | 103.265 | 31.511 | 19.5 | 103.237 | 31.485 | 19.5 | 103.207 | 31.511 | 19.9 | 103.236 | 31.537 | 19.9 | 0.00 | 1.52 | 1.52 | 0.00 | 0.12 | 0.12 |
| 1441 | 103.237 | 31.485 | 19.5 | 103.208 | 31.459 | 19.5 | 103.178 | 31.485 | 19.9 | 103.207 | 31.511 | 19.9 | 0.00 | 1.73 | 1.73 | 0.00 | 0.12 | 0.12 |
| 1442 | 103.208 | 31.459 | 19.5 | 103.179 | 31.433 | 19.5 | 103.150 | 31.459 | 19.9 | 103.178 | 31.485 | 19.9 | 0.00 | 1.75 | 1.75 | 0.00 | 0.13 | 0.13 |
| 1443 | 103.179 | 31.433 | 19.5 | 103.150 | 31.407 | 19.5 | 103.121 | 31.433 | 19.9 | 103.150 | 31.459 | 19.9 | 0.00 | 1.63 | 1.63 | 0.00 | 0.12 | 0.12 |
| 1444 | 103.150 | 31.407 | 19.5 | 103.121 | 31.381 | 19.5 | 103.092 | 31.407 | 19.9 | 103.121 | 31.433 | 19.9 | 0.00 | 1.35 | 1.35 | 0.00 | 0.10 | 0.10 |
| 1445 | 103.121 | 31.381 | 19.5 | 103.092 | 31.355 | 19.5 | 103.063 | 31.381 | 19.9 | 103.092 | 31.407 | 19.9 | 0.00 | 0.93 | 0.93 | 0.06 | 0.10 | 0.12 |
| 1446 | 103.092 | 31.355 | 19.5 | 103.063 | 31.329 | 19.5 | 103.034 | 31.355 | 19.9 | 103.063 | 31.381 | 19.9 | 0.00 | 0.48 | 0.48 | 0.08 | 0.10 | 0.13 |
| 1447 | 103.063 | 31.329 | 19.5 | 103.034 | 31.303 | 19.5 | 103.005 | 31.329 | 19.9 | 103.034 | 31.355 | 19.9 | 0.00 | 0.18 | 0.18 | 0.07 | 0.08 | 0.11 |
| 1448 | 103.034 | 31.303 | 19.5 | 103.006 | 31.277 | 19.5 | 102.977 | 31.303 | 19.9 | 103.005 | 31.329 | 19.9 | 0.00 | 0.07 | 0.07 | 0.01 | 0.04 | 0.04 |
| 1449 | 103.006 | 31.277 | 19.5 | 102.977 | 31.251 | 19.5 | 102.948 | 31.277 | 19.9 | 102.977 | 31.303 | 19.9 | 0.00 | 0.02 | 0.02 | 0.00 | 0.02 | 0.02 |
| 1450 | 102.977 | 31.251 | 19.5 | 102.948 | 31.225 | 19.5 | 102.919 | 31.251 | 19.9 | 102.948 | 31.277 | 19.9 | 0.00 | 0.00 | 0.00 | 0.00 | 0.00 | 0.00 |
| 1451 | 102.948 | 31.225 | 19.5 | 102.919 | 31.199 | 19.5 | 102.890 | 31.225 | 19.9 | 102.919 | 31.251 | 19.9 | 0.00 | 0.00 | 0.00 | 0.00 | 0.00 | 0.00 |
| 1452 | 102.919 | 31.199 | 19.5 | 102.890 | 31.173 | 19.5 | 102.861 | 31.199 | 19.9 | 102.890 | 31.225 | 19.9 | 0.00 | 0.00 | 0.00 | 0.00 | 0.00 | 0.00 |
| 1453 | 102.890 | 31.173 | 19.5 | 102.861 | 31.147 | 19.5 | 102.832 | 31.173 | 19.9 | 102.861 | 31.199 | 19.9 | 0.00 | 0.00 | 0.00 | 0.00 | 0.00 | 0.00 |
| 1454 | 102.861 | 31.147 | 19.5 | 102.832 | 31.121 | 19.5 | 102.803 | 31.147 | 19.9 | 102.832 | 31.173 | 19.9 | 0.00 | 0.00 | 0.00 | 0.00 | 0.01 | 0.01 |
| 1455 | 102.832 | 31.121 | 19.5 | 102.803 | 31.095 | 19.5 | 102.774 | 31.121 | 19.9 | 102.803 | 31.147 | 19.9 | 0.00 | 0.00 | 0.00 | 0.00 | 0.08 | 0.08 |
| 1456 | 102.803 | 31.095 | 19.5 | 102.775 | 31.069 | 19.5 | 102.746 | 31.095 | 19.9 | 102.774 | 31.121 | 19.9 | 0.00 | 0.58 | 0.58 | 0.00 | 0.17 | 0.17 |
| 1457 | 102.775 | 31.069 | 19.5 | 102.746 | 31.044 | 19.5 | 102.717 | 31.069 | 19.9 | 102.746 | 31.095 | 19.9 | 0.00 | 1.00 | 1.00 | 0.00 | 0.02 | 0.02 |
| 1458 | 102.746 | 31.044 | 19.5 | 102.717 | 31.017 | 19.5 | 102.688 | 31.043 | 19.9 | 102.717 | 31.069 | 19.9 | 0.91 | 1.00 | 1.35 | 0.00 | 0.00 | 0.00 |

|      |         |        |      |         |        |      |         |        |      |         |        |      |      |      |      |      |      |      |
|------|---------|--------|------|---------|--------|------|---------|--------|------|---------|--------|------|------|------|------|------|------|------|
| 1459 | 104.072 | 32.289 | 19.9 | 104.043 | 32.263 | 19.9 | 104.014 | 32.289 | 20.4 | 104.043 | 32.315 | 20.4 | 1.00 | 1.00 | 1.41 | 0.00 | 0.03 | 0.03 |
| 1460 | 104.043 | 32.263 | 19.9 | 104.014 | 32.237 | 19.9 | 103.985 | 32.263 | 20.4 | 104.014 | 32.289 | 20.4 | 0.00 | 0.92 | 0.92 | 0.00 | 0.06 | 0.06 |
| 1461 | 104.014 | 32.237 | 19.9 | 103.986 | 32.211 | 19.9 | 103.956 | 32.237 | 20.4 | 103.985 | 32.263 | 20.4 | 0.00 | 0.77 | 0.77 | 0.00 | 0.13 | 0.13 |
| 1462 | 103.986 | 32.211 | 19.9 | 103.957 | 32.185 | 19.9 | 103.928 | 32.211 | 20.4 | 103.956 | 32.237 | 20.4 | 0.00 | 0.36 | 0.36 | 0.02 | 0.12 | 0.12 |
| 1463 | 103.957 | 32.185 | 19.9 | 103.928 | 32.160 | 19.9 | 103.899 | 32.185 | 20.4 | 103.928 | 32.211 | 20.4 | 0.02 | 0.01 | 0.03 | 0.08 | 0.03 | 0.09 |
| 1464 | 103.928 | 32.160 | 19.9 | 103.899 | 32.133 | 19.9 | 103.870 | 32.159 | 20.4 | 103.899 | 32.185 | 20.4 | 0.16 | 0.00 | 0.16 | 0.10 | 0.00 | 0.10 |
| 1465 | 103.899 | 32.133 | 19.9 | 103.870 | 32.108 | 19.9 | 103.841 | 32.133 | 20.4 | 103.870 | 32.159 | 20.4 | 0.24 | 0.00 | 0.24 | 0.09 | 0.00 | 0.09 |
| 1466 | 103.870 | 32.108 | 19.9 | 103.841 | 32.081 | 19.9 | 103.812 | 32.107 | 20.4 | 103.841 | 32.133 | 20.4 | 0.24 | 0.00 | 0.24 | 0.08 | 0.00 | 0.08 |
| 1467 | 103.841 | 32.081 | 19.9 | 103.812 | 32.056 | 19.9 | 103.783 | 32.081 | 20.4 | 103.812 | 32.107 | 20.4 | 0.22 | 0.00 | 0.22 | 0.07 | 0.00 | 0.07 |
| 1468 | 103.812 | 32.056 | 19.9 | 103.783 | 32.029 | 19.9 | 103.754 | 32.055 | 20.4 | 103.783 | 32.081 | 20.4 | 0.23 | 0.00 | 0.23 | 0.07 | 0.00 | 0.07 |
| 1469 | 103.783 | 32.029 | 19.9 | 103.755 | 32.004 | 19.9 | 103.725 | 32.029 | 20.4 | 103.754 | 32.055 | 20.4 | 0.25 | 0.00 | 0.25 | 0.06 | 0.00 | 0.06 |
| 1470 | 103.755 | 32.004 | 19.9 | 103.726 | 31.978 | 19.9 | 103.697 | 32.003 | 20.4 | 103.725 | 32.029 | 20.4 | 0.22 | 0.00 | 0.22 | 0.01 | 0.00 | 0.01 |
| 1471 | 103.726 | 31.978 | 19.9 | 103.697 | 31.952 | 19.9 | 103.668 | 31.977 | 20.4 | 103.697 | 32.003 | 20.4 | 0.15 | 0.00 | 0.15 | 0.00 | 0.00 | 0.00 |
| 1472 | 103.697 | 31.952 | 19.9 | 103.668 | 31.926 | 19.9 | 103.639 | 31.951 | 20.4 | 103.668 | 31.977 | 20.4 | 0.13 | 0.00 | 0.13 | 0.00 | 0.00 | 0.00 |
| 1473 | 103.668 | 31.926 | 19.9 | 103.639 | 31.900 | 19.9 | 103.610 | 31.925 | 20.4 | 103.639 | 31.951 | 20.4 | 0.16 | 0.00 | 0.16 | 0.08 | 0.00 | 0.08 |
| 1474 | 103.639 | 31.900 | 19.9 | 103.610 | 31.874 | 19.9 | 103.581 | 31.899 | 20.4 | 103.610 | 31.925 | 20.4 | 0.14 | 0.00 | 0.14 | 0.08 | 0.00 | 0.08 |
| 1475 | 103.610 | 31.874 | 19.9 | 103.581 | 31.848 | 19.9 | 103.552 | 31.873 | 20.4 | 103.581 | 31.899 | 20.4 | 0.05 | 0.00 | 0.05 | 0.00 | 0.00 | 0.00 |
| 1476 | 103.581 | 31.848 | 19.9 | 103.552 | 31.822 | 19.9 | 103.523 | 31.847 | 20.4 | 103.552 | 31.873 | 20.4 | 0.00 | 0.00 | 0.00 | 0.00 | 0.00 | 0.00 |
| 1477 | 103.552 | 31.822 | 19.9 | 103.524 | 31.796 | 19.9 | 103.495 | 31.822 | 20.4 | 103.523 | 31.847 | 20.4 | 0.00 | 0.00 | 0.00 | 0.00 | 0.00 | 0.00 |
| 1478 | 103.524 | 31.796 | 19.9 | 103.495 | 31.770 | 19.9 | 103.466 | 31.796 | 20.4 | 103.495 | 31.821 | 20.4 | 0.00 | 0.00 | 0.00 | 0.00 | 0.00 | 0.00 |
| 1479 | 103.495 | 31.770 | 19.9 | 103.466 | 31.744 | 19.9 | 103.437 | 31.770 | 20.4 | 103.466 | 31.796 | 20.4 | 0.00 | 0.00 | 0.00 | 0.00 | 0.00 | 0.00 |
| 1480 | 103.466 | 31.744 | 19.9 | 103.437 | 31.718 | 19.9 | 103.408 | 31.744 | 20.4 | 103.437 | 31.770 | 20.4 | 0.00 | 0.00 | 0.00 | 0.00 | 0.00 | 0.00 |
| 1481 | 103.437 | 31.718 | 19.9 | 103.408 | 31.692 | 19.9 | 103.379 | 31.718 | 20.4 | 103.408 | 31.744 | 20.4 | 0.00 | 0.00 | 0.00 | 0.00 | 0.00 | 0.00 |
| 1482 | 103.408 | 31.692 | 19.9 | 103.379 | 31.666 | 19.9 | 103.350 | 31.692 | 20.4 | 103.379 | 31.718 | 20.4 | 0.00 | 0.00 | 0.00 | 0.00 | 0.00 | 0.00 |
| 1483 | 103.379 | 31.666 | 19.9 | 103.350 | 31.640 | 19.9 | 103.321 | 31.666 | 20.4 | 103.350 | 31.692 | 20.4 | 0.00 | 0.00 | 0.00 | 0.00 | 0.00 | 0.00 |
| 1484 | 103.350 | 31.640 | 19.9 | 103.322 | 31.614 | 19.9 | 103.293 | 31.640 | 20.4 | 103.321 | 31.666 | 20.4 | 0.42 | 0.00 | 0.42 | 0.00 | 0.00 | 0.00 |
| 1485 | 103.322 | 31.614 | 19.9 | 103.293 | 31.588 | 19.9 | 103.264 | 31.613 | 20.4 | 103.293 | 31.640 | 20.4 | 0.00 | 0.00 | 0.00 | 0.00 | 0.00 | 0.00 |
| 1486 | 103.293 | 31.588 | 19.9 | 103.264 | 31.562 | 19.9 | 103.235 | 31.587 | 20.4 | 103.264 | 31.613 | 20.4 | 0.00 | 0.03 | 0.03 | 0.00 | 0.06 | 0.06 |
| 1487 | 103.264 | 31.562 | 19.9 | 103.235 | 31.536 | 19.9 | 103.206 | 31.561 | 20.4 | 103.235 | 31.587 | 20.4 | 0.00 | 0.54 | 0.54 | 0.00 | 0.10 | 0.10 |
| 1488 | 103.235 | 31.536 | 19.9 | 103.206 | 31.510 | 19.9 | 103.177 | 31.535 | 20.4 | 103.206 | 31.561 | 20.4 | 0.00 | 1.28 | 1.28 | 0.00 | 0.11 | 0.11 |
| 1489 | 103.206 | 31.510 | 19.9 | 103.177 | 31.484 | 19.9 | 103.148 | 31.509 | 20.4 | 103.177 | 31.535 | 20.4 | 0.00 | 2.00 | 2.00 | 0.00 | 0.11 | 0.11 |
| 1490 | 103.177 | 31.484 | 19.9 | 103.148 | 31.458 | 19.9 | 103.119 | 31.483 | 20.4 | 103.148 | 31.509 | 20.4 | 0.00 | 2.54 | 2.54 | 0.00 | 0.12 | 0.12 |
| 1491 | 103.148 | 31.458 | 19.9 | 103.120 | 31.432 | 19.9 | 103.090 | 31.457 | 20.4 | 103.119 | 31.483 | 20.4 | 0.00 | 2.72 | 2.72 | 0.00 | 0.10 | 0.10 |
| 1492 | 103.120 | 31.432 | 19.9 | 103.091 | 31.406 | 19.9 | 103.061 | 31.431 | 20.4 | 103.090 | 31.457 | 20.4 | 0.00 | 2.41 | 2.41 | 0.00 | 0.09 | 0.09 |
| 1493 | 103.091 | 31.406 | 19.9 | 103.062 | 31.380 | 19.9 | 103.033 | 31.405 | 20.4 | 103.061 | 31.431 | 20.4 | 0.00 | 1.68 | 1.68 | 0.00 | 0.13 | 0.13 |
| 1494 | 103.062 | 31.380 | 19.9 | 103.033 | 31.354 | 19.9 | 103.004 | 31.380 | 20.4 | 103.033 | 31.405 | 20.4 | 0.00 | 0.87 | 0.87 | 0.00 | 0.14 | 0.14 |
| 1495 | 103.033 | 31.354 | 19.9 | 103.004 | 31.328 | 19.9 | 102.975 | 31.354 | 20.4 | 103.004 | 31.380 | 20.4 | 1.00 | 1.01 | 1.41 | 0.00 | 0.09 | 0.09 |
| 1496 | 103.004 | 31.328 | 19.9 | 102.975 | 31.302 | 19.9 | 102.946 | 31.328 | 20.4 | 102.975 | 31.354 | 20.4 | 1.58 | 0.00 | 1.87 | 0.00 | 0.01 | 0.01 |
| 1497 | 102.975 | 31.302 | 19.9 | 102.946 | 31.276 | 19.9 | 102.917 | 31.302 | 20.4 | 102.946 | 31.328 | 20.4 | 2.02 | 0.00 | 2.02 | 0.00 | 0.00 | 0.00 |

|      |         |        |      |         |        |      |         |        |      |         |        |      |      |      |      |      |      |      |
|------|---------|--------|------|---------|--------|------|---------|--------|------|---------|--------|------|------|------|------|------|------|------|
| 1498 | 102.946 | 31.276 | 19.9 | 102.917 | 31.250 | 19.9 | 102.888 | 31.276 | 20.4 | 102.917 | 31.302 | 20.4 | 2.27 | 0.00 | 2.27 | 0.00 | 0.00 | 0.00 |
| 1499 | 102.917 | 31.250 | 19.9 | 102.889 | 31.224 | 19.9 | 102.859 | 31.250 | 20.4 | 102.888 | 31.276 | 20.4 | 1.00 | 0.00 | 1.00 | 0.00 | 0.00 | 0.00 |
| 1500 | 102.889 | 31.224 | 19.9 | 102.860 | 31.198 | 19.9 | 102.831 | 31.224 | 20.4 | 102.859 | 31.250 | 20.4 | 0.00 | 0.00 | 0.00 | 0.00 | 0.00 | 0.00 |
| 1501 | 102.860 | 31.198 | 19.9 | 102.831 | 31.172 | 19.9 | 102.802 | 31.198 | 20.4 | 102.831 | 31.224 | 20.4 | 0.00 | 0.00 | 0.00 | 0.00 | 0.00 | 0.00 |
| 1502 | 102.831 | 31.172 | 19.9 | 102.802 | 31.146 | 19.9 | 102.773 | 31.172 | 20.4 | 102.802 | 31.198 | 20.4 | 0.00 | 0.00 | 0.00 | 0.00 | 0.01 | 0.01 |
| 1503 | 102.802 | 31.146 | 19.9 | 102.773 | 31.120 | 19.9 | 102.744 | 31.146 | 20.4 | 102.773 | 31.172 | 20.4 | 0.00 | 0.00 | 0.00 | 0.00 | 0.09 | 0.09 |
| 1504 | 102.773 | 31.120 | 19.9 | 102.744 | 31.094 | 19.9 | 102.715 | 31.120 | 20.4 | 102.744 | 31.146 | 20.4 | 0.00 | 0.60 | 0.60 | 0.00 | 0.20 | 0.20 |
| 1505 | 102.744 | 31.094 | 19.9 | 102.715 | 31.068 | 19.9 | 102.686 | 31.094 | 20.4 | 102.715 | 31.120 | 20.4 | 0.00 | 1.00 | 1.00 | 0.00 | 0.01 | 0.01 |
| 1506 | 102.715 | 31.068 | 19.9 | 102.686 | 31.042 | 19.9 | 102.657 | 31.068 | 20.4 | 102.686 | 31.094 | 20.4 | 0.00 | 1.00 | 1.00 | 0.05 | 0.01 | 0.05 |
| 1507 | 104.042 | 32.314 | 20.4 | 104.013 | 32.288 | 20.4 | 103.984 | 32.314 | 20.8 | 104.013 | 32.340 | 20.8 | 0.40 | 0.80 | 0.90 | 0.05 | 0.10 | 0.11 |
| 1508 | 104.013 | 32.288 | 20.4 | 103.984 | 32.262 | 20.4 | 103.955 | 32.288 | 20.8 | 103.984 | 32.314 | 20.8 | 0.00 | 0.47 | 0.47 | 0.00 | 0.13 | 0.13 |
| 1509 | 103.984 | 32.262 | 20.4 | 103.955 | 32.236 | 20.4 | 103.926 | 32.262 | 20.8 | 103.955 | 32.288 | 20.8 | 0.00 | 0.29 | 0.29 | 0.00 | 0.13 | 0.13 |
| 1510 | 103.955 | 32.236 | 20.4 | 103.926 | 32.210 | 20.4 | 103.897 | 32.236 | 20.8 | 103.926 | 32.262 | 20.8 | 0.00 | 0.10 | 0.10 | 0.00 | 0.09 | 0.09 |
| 1511 | 103.926 | 32.210 | 20.4 | 103.897 | 32.184 | 20.4 | 103.868 | 32.210 | 20.8 | 103.897 | 32.236 | 20.8 | 0.00 | 0.00 | 0.00 | 0.00 | 0.01 | 0.01 |
| 1512 | 103.897 | 32.184 | 20.4 | 103.868 | 32.158 | 20.4 | 103.839 | 32.184 | 20.8 | 103.868 | 32.210 | 20.8 | 0.00 | 0.00 | 0.00 | 0.00 | 0.00 | 0.00 |
| 1513 | 103.868 | 32.158 | 20.4 | 103.840 | 32.132 | 20.4 | 103.811 | 32.158 | 20.8 | 103.839 | 32.184 | 20.8 | 0.00 | 0.00 | 0.00 | 0.00 | 0.00 | 0.00 |
| 1514 | 103.840 | 32.132 | 20.4 | 103.811 | 32.106 | 20.4 | 103.782 | 32.132 | 20.8 | 103.811 | 32.158 | 20.8 | 0.00 | 0.00 | 0.00 | 0.00 | 0.00 | 0.00 |
| 1515 | 103.811 | 32.106 | 20.4 | 103.782 | 32.080 | 20.4 | 103.753 | 32.106 | 20.8 | 103.782 | 32.132 | 20.8 | 0.00 | 0.00 | 0.00 | 0.00 | 0.00 | 0.00 |
| 1516 | 103.782 | 32.080 | 20.4 | 103.753 | 32.054 | 20.4 | 103.724 | 32.080 | 20.8 | 103.753 | 32.106 | 20.8 | 0.00 | 0.00 | 0.00 | 0.00 | 0.00 | 0.00 |
| 1517 | 103.753 | 32.054 | 20.4 | 103.724 | 32.028 | 20.4 | 103.695 | 32.054 | 20.8 | 103.724 | 32.080 | 20.8 | 0.00 | 0.00 | 0.00 | 0.00 | 0.00 | 0.00 |
| 1518 | 103.724 | 32.028 | 20.4 | 103.695 | 32.002 | 20.4 | 103.666 | 32.028 | 20.8 | 103.695 | 32.054 | 20.8 | 0.00 | 0.00 | 0.00 | 0.00 | 0.00 | 0.00 |
| 1519 | 103.695 | 32.002 | 20.4 | 103.666 | 31.976 | 20.4 | 103.637 | 32.002 | 20.8 | 103.666 | 32.028 | 20.8 | 0.00 | 0.00 | 0.00 | 0.00 | 0.00 | 0.00 |
| 1520 | 103.666 | 31.976 | 20.4 | 103.638 | 31.950 | 20.4 | 103.608 | 31.976 | 20.8 | 103.637 | 32.002 | 20.8 | 0.00 | 0.00 | 0.00 | 0.00 | 0.00 | 0.00 |
| 1521 | 103.638 | 31.950 | 20.4 | 103.609 | 31.924 | 20.4 | 103.579 | 31.950 | 20.8 | 103.608 | 31.976 | 20.8 | 0.00 | 0.00 | 0.00 | 0.07 | 0.00 | 0.07 |
| 1522 | 103.609 | 31.924 | 20.4 | 103.580 | 31.898 | 20.4 | 103.551 | 31.924 | 20.8 | 103.580 | 31.950 | 20.8 | 0.00 | 0.00 | 0.00 | 0.06 | 0.00 | 0.06 |
| 1523 | 103.580 | 31.898 | 20.4 | 103.551 | 31.872 | 20.4 | 103.522 | 31.898 | 20.8 | 103.551 | 31.924 | 20.8 | 0.00 | 0.00 | 0.00 | 0.04 | 0.00 | 0.04 |
| 1524 | 103.551 | 31.872 | 20.4 | 103.522 | 31.846 | 20.4 | 103.493 | 31.872 | 20.8 | 103.522 | 31.898 | 20.8 | 0.00 | 0.00 | 0.00 | 0.00 | 0.00 | 0.00 |
| 1525 | 103.522 | 31.846 | 20.4 | 103.493 | 31.820 | 20.4 | 103.464 | 31.846 | 20.8 | 103.493 | 31.872 | 20.8 | 0.00 | 0.00 | 0.00 | 0.00 | 0.00 | 0.00 |
| 1526 | 103.493 | 31.820 | 20.4 | 103.464 | 31.794 | 20.4 | 103.435 | 31.820 | 20.8 | 103.464 | 31.846 | 20.8 | 0.00 | 0.00 | 0.00 | 0.08 | 0.00 | 0.08 |
| 1527 | 103.464 | 31.794 | 20.4 | 103.435 | 31.768 | 20.4 | 103.406 | 31.794 | 20.8 | 103.435 | 31.820 | 20.8 | 0.00 | 0.00 | 0.00 | 0.12 | 0.00 | 0.12 |
| 1528 | 103.435 | 31.768 | 20.4 | 103.407 | 31.742 | 20.4 | 103.377 | 31.768 | 20.8 | 103.406 | 31.794 | 20.8 | 0.00 | 0.00 | 0.00 | 0.11 | 0.00 | 0.11 |
| 1529 | 103.407 | 31.742 | 20.4 | 103.378 | 31.716 | 20.4 | 103.349 | 31.742 | 20.8 | 103.377 | 31.768 | 20.8 | 0.00 | 0.00 | 0.00 | 0.10 | 0.00 | 0.10 |
| 1530 | 103.378 | 31.716 | 20.4 | 103.349 | 31.690 | 20.4 | 103.320 | 31.716 | 20.8 | 103.349 | 31.742 | 20.8 | 0.00 | 0.00 | 0.00 | 0.12 | 0.00 | 0.12 |
| 1531 | 103.349 | 31.690 | 20.4 | 103.320 | 31.664 | 20.4 | 103.291 | 31.690 | 20.8 | 103.320 | 31.716 | 20.8 | 0.00 | 0.00 | 0.00 | 0.12 | 0.00 | 0.12 |
| 1532 | 103.320 | 31.664 | 20.4 | 103.291 | 31.638 | 20.4 | 103.262 | 31.664 | 20.8 | 103.291 | 31.690 | 20.8 | 0.31 | 0.00 | 0.31 | 0.06 | 0.00 | 0.06 |
| 1533 | 103.291 | 31.638 | 20.4 | 103.262 | 31.612 | 20.4 | 103.233 | 31.638 | 20.8 | 103.262 | 31.664 | 20.8 | 0.00 | 0.00 | 0.00 | 0.01 | 0.00 | 0.01 |
| 1534 | 103.262 | 31.612 | 20.4 | 103.233 | 31.586 | 20.4 | 103.204 | 31.612 | 20.8 | 103.233 | 31.638 | 20.8 | 0.00 | 0.00 | 0.00 | 0.00 | 0.00 | 0.00 |
| 1535 | 103.233 | 31.586 | 20.4 | 103.204 | 31.560 | 20.4 | 103.175 | 31.586 | 20.8 | 103.204 | 31.612 | 20.8 | 0.00 | 0.08 | 0.08 | 0.00 | 0.05 | 0.05 |
| 1536 | 103.204 | 31.560 | 20.4 | 103.176 | 31.534 | 20.4 | 103.147 | 31.560 | 20.8 | 103.175 | 31.586 | 20.8 | 0.00 | 0.51 | 0.51 | 0.00 | 0.08 | 0.08 |



|      |         |        |      |         |        |      |         |        |      |         |        |      |      |      |      |      |      |      |
|------|---------|--------|------|---------|--------|------|---------|--------|------|---------|--------|------|------|------|------|------|------|------|
| 1537 | 103.176 | 31.534 | 20.4 | 103.147 | 31.508 | 20.4 | 103.118 | 31.534 | 20.8 | 103.147 | 31.560 | 20.8 | 0.00 | 1.16 | 1.16 | 0.00 | 0.11 | 0.11 |
| 1538 | 103.147 | 31.508 | 20.4 | 103.118 | 31.482 | 20.4 | 103.089 | 31.508 | 20.8 | 103.118 | 31.534 | 20.8 | 0.07 | 1.83 | 1.83 | 0.00 | 0.13 | 0.13 |
| 1539 | 103.118 | 31.482 | 20.4 | 103.089 | 31.456 | 20.4 | 103.060 | 31.482 | 20.8 | 103.089 | 31.508 | 20.8 | 0.39 | 2.22 | 2.25 | 0.04 | 0.12 | 0.13 |
| 1540 | 103.089 | 31.456 | 20.4 | 103.060 | 31.430 | 20.4 | 103.031 | 31.456 | 20.8 | 103.060 | 31.482 | 20.8 | 0.85 | 2.06 | 2.23 | 0.08 | 0.11 | 0.14 |
| 1541 | 103.060 | 31.430 | 20.4 | 103.031 | 31.404 | 20.4 | 103.002 | 31.430 | 20.8 | 103.031 | 31.456 | 20.8 | 1.32 | 1.40 | 1.92 | 0.10 | 0.13 | 0.16 |
| 1542 | 103.031 | 31.404 | 20.4 | 103.002 | 31.378 | 20.4 | 102.973 | 31.404 | 20.8 | 103.002 | 31.430 | 20.8 | 1.68 | 0.60 | 1.78 | 0.11 | 0.13 | 0.17 |
| 1543 | 103.002 | 31.378 | 20.4 | 102.974 | 31.352 | 20.4 | 102.945 | 31.378 | 20.8 | 102.973 | 31.404 | 20.8 | 1.93 | 0.10 | 1.93 | 0.07 | 0.06 | 0.09 |
| 1544 | 102.974 | 31.352 | 20.4 | 102.945 | 31.326 | 20.4 | 102.916 | 31.352 | 20.8 | 102.945 | 31.378 | 20.8 | 2.11 | 0.00 | 2.11 | 0.07 | 0.00 | 0.07 |
| 1545 | 102.945 | 31.326 | 20.4 | 102.916 | 31.300 | 20.4 | 102.887 | 31.326 | 20.8 | 102.916 | 31.352 | 20.8 | 2.23 | 0.00 | 2.23 | 0.09 | 0.00 | 0.09 |
| 1546 | 102.916 | 31.300 | 20.4 | 102.887 | 31.274 | 20.4 | 102.858 | 31.300 | 20.8 | 102.887 | 31.326 | 20.8 | 2.30 | 0.00 | 2.30 | 0.12 | 0.00 | 0.12 |
| 1547 | 102.887 | 31.274 | 20.4 | 102.858 | 31.248 | 20.4 | 102.829 | 31.274 | 20.8 | 102.858 | 31.300 | 20.8 | 2.34 | 0.00 | 2.34 | 0.16 | 0.00 | 0.16 |
| 1548 | 102.858 | 31.248 | 20.4 | 102.829 | 31.222 | 20.4 | 102.800 | 31.248 | 20.8 | 102.829 | 31.274 | 20.8 | 0.00 | 0.00 | 0.00 | 0.21 | 0.00 | 0.21 |
| 1549 | 102.829 | 31.222 | 20.4 | 102.800 | 31.196 | 20.4 | 102.771 | 31.222 | 20.8 | 102.800 | 31.248 | 20.8 | 0.00 | 0.00 | 0.00 | 0.22 | 0.00 | 0.22 |
| 1550 | 102.800 | 31.196 | 20.4 | 102.772 | 31.170 | 20.4 | 102.743 | 31.196 | 20.8 | 102.771 | 31.222 | 20.8 | 0.00 | 0.00 | 0.00 | 0.18 | 0.00 | 0.18 |
| 1551 | 102.772 | 31.170 | 20.4 | 102.743 | 31.144 | 20.4 | 102.714 | 31.170 | 20.8 | 102.743 | 31.196 | 20.8 | 0.00 | 0.00 | 0.00 | 0.11 | 0.01 | 0.11 |
| 1552 | 102.743 | 31.144 | 20.4 | 102.714 | 31.118 | 20.4 | 102.685 | 31.144 | 20.8 | 102.714 | 31.170 | 20.8 | 0.77 | 0.25 | 0.81 | 0.06 | 0.13 | 0.14 |
| 1553 | 102.714 | 31.118 | 20.4 | 102.685 | 31.092 | 20.4 | 102.656 | 31.118 | 20.8 | 102.685 | 31.144 | 20.8 | 0.59 | 0.75 | 0.96 | 0.00 | 0.15 | 0.15 |
| 1554 | 102.685 | 31.092 | 20.4 | 102.656 | 31.066 | 20.4 | 102.627 | 31.092 | 20.8 | 102.656 | 31.118 | 20.8 | 1.00 | 1.00 | 1.41 | 0.00 | 0.19 | 0.19 |
| 1555 | 104.011 | 32.339 | 20.8 | 103.982 | 32.313 | 20.8 | 103.953 | 32.339 | 21.2 | 103.982 | 32.365 | 21.2 | 1.00 | 0.52 | 1.13 | 0.00 | 0.18 | 0.18 |
| 1556 | 103.982 | 32.313 | 20.8 | 103.954 | 32.287 | 20.8 | 103.924 | 32.313 | 21.2 | 103.953 | 32.339 | 21.2 | 0.47 | 0.07 | 0.48 | 0.06 | 0.11 | 0.13 |
| 1557 | 103.954 | 32.287 | 20.8 | 103.925 | 32.261 | 20.8 | 103.895 | 32.287 | 21.2 | 103.924 | 32.313 | 21.2 | 1.00 | 0.00 | 1.00 | 0.08 | 0.05 | 0.09 |
| 1558 | 103.925 | 32.261 | 20.8 | 103.896 | 32.235 | 20.8 | 103.867 | 32.261 | 21.2 | 103.895 | 32.287 | 21.2 | 1.00 | 0.00 | 1.00 | 0.00 | 0.01 | 0.01 |
| 1559 | 103.896 | 32.235 | 20.8 | 103.867 | 32.209 | 20.8 | 103.838 | 32.235 | 21.2 | 103.867 | 32.261 | 21.2 | 1.00 | 0.00 | 1.00 | 0.00 | 0.01 | 0.01 |
| 1560 | 103.867 | 32.209 | 20.8 | 103.838 | 32.183 | 20.8 | 103.809 | 32.209 | 21.2 | 103.838 | 32.235 | 21.2 | 1.00 | 0.00 | 1.00 | 0.00 | 0.05 | 0.05 |
| 1561 | 103.838 | 32.183 | 20.8 | 103.809 | 32.157 | 20.8 | 103.780 | 32.183 | 21.2 | 103.809 | 32.209 | 21.2 | 1.00 | 0.00 | 1.00 | 0.00 | 0.07 | 0.07 |
| 1562 | 103.809 | 32.157 | 20.8 | 103.780 | 32.131 | 20.8 | 103.751 | 32.157 | 21.2 | 103.780 | 32.183 | 21.2 | 1.00 | 0.00 | 1.00 | 0.00 | 0.06 | 0.06 |
| 1563 | 103.780 | 32.131 | 20.8 | 103.751 | 32.105 | 20.8 | 103.722 | 32.131 | 21.2 | 103.751 | 32.157 | 21.2 | 1.00 | 0.00 | 1.00 | 0.00 | 0.03 | 0.03 |
| 1564 | 103.751 | 32.105 | 20.8 | 103.722 | 32.079 | 20.8 | 103.693 | 32.105 | 21.2 | 103.722 | 32.131 | 21.2 | 1.00 | 0.00 | 1.00 | 0.00 | 0.01 | 0.01 |
| 1565 | 103.722 | 32.079 | 20.8 | 103.694 | 32.053 | 20.8 | 103.665 | 32.079 | 21.2 | 103.693 | 32.105 | 21.2 | 1.00 | 0.00 | 1.00 | 0.00 | 0.00 | 0.00 |
| 1566 | 103.694 | 32.053 | 20.8 | 103.665 | 32.027 | 20.8 | 103.636 | 32.053 | 21.2 | 103.665 | 32.079 | 21.2 | 1.00 | 0.00 | 1.00 | 0.00 | 0.00 | 0.00 |
| 1567 | 103.665 | 32.027 | 20.8 | 103.636 | 32.001 | 20.8 | 103.607 | 32.027 | 21.2 | 103.636 | 32.053 | 21.2 | 1.00 | 0.00 | 1.00 | 0.03 | 0.00 | 0.03 |
| 1568 | 103.636 | 32.001 | 20.8 | 103.607 | 31.975 | 20.8 | 103.578 | 32.001 | 21.2 | 103.607 | 32.027 | 21.2 | 1.00 | 0.00 | 1.00 | 0.00 | 0.00 | 0.00 |
| 1569 | 103.607 | 31.975 | 20.8 | 103.578 | 31.949 | 20.8 | 103.549 | 31.975 | 21.2 | 103.578 | 32.001 | 21.2 | 1.00 | 0.00 | 1.00 | 0.04 | 0.00 | 0.04 |
| 1570 | 103.578 | 31.949 | 20.8 | 103.549 | 31.923 | 20.8 | 103.520 | 31.949 | 21.2 | 103.549 | 31.975 | 21.2 | 1.00 | 0.00 | 1.00 | 0.00 | 0.00 | 0.00 |
| 1571 | 103.549 | 31.923 | 20.8 | 103.520 | 31.897 | 20.8 | 103.491 | 31.923 | 21.2 | 103.520 | 31.949 | 21.2 | 1.00 | 0.00 | 1.00 | 0.05 | 0.00 | 0.05 |
| 1572 | 103.520 | 31.897 | 20.8 | 103.492 | 31.871 | 20.8 | 103.463 | 31.897 | 21.2 | 103.491 | 31.923 | 21.2 | 1.00 | 0.00 | 1.00 | 0.07 | 0.00 | 0.07 |
| 1573 | 103.492 | 31.871 | 20.8 | 103.463 | 31.845 | 20.8 | 103.434 | 31.871 | 21.2 | 103.463 | 31.897 | 21.2 | 1.00 | 0.00 | 1.00 | 0.05 | 0.00 | 0.05 |
| 1574 | 103.463 | 31.845 | 20.8 | 103.434 | 31.819 | 20.8 | 103.405 | 31.845 | 21.2 | 103.434 | 31.871 | 21.2 | 1.33 | 0.00 | 1.33 | 0.09 | 0.00 | 0.09 |
| 1575 | 103.434 | 31.819 | 20.8 | 103.405 | 31.793 | 20.8 | 103.376 | 31.819 | 21.2 | 103.405 | 31.845 | 21.2 | 1.25 | 0.00 | 1.25 | 0.11 | 0.00 | 0.11 |

|      |         |        |      |         |        |      |         |        |      |         |        |      |      |      |      |      |      |      |
|------|---------|--------|------|---------|--------|------|---------|--------|------|---------|--------|------|------|------|------|------|------|------|
| 1576 | 103.405 | 31.793 | 20.8 | 103.376 | 31.767 | 20.8 | 103.347 | 31.793 | 21.2 | 103.376 | 31.819 | 21.2 | 1.01 | 0.00 | 1.01 | 0.07 | 0.00 | 0.07 |
| 1577 | 103.376 | 31.767 | 20.8 | 103.347 | 31.741 | 20.8 | 103.318 | 31.767 | 21.2 | 103.347 | 31.793 | 21.2 | 0.74 | 0.00 | 0.74 | 0.00 | 0.00 | 0.00 |
| 1578 | 103.347 | 31.741 | 20.8 | 103.318 | 31.715 | 20.8 | 103.289 | 31.741 | 21.2 | 103.318 | 31.767 | 21.2 | 0.38 | 0.00 | 0.38 | 0.00 | 0.00 | 0.00 |
| 1579 | 103.318 | 31.715 | 20.8 | 103.290 | 31.689 | 20.8 | 103.260 | 31.715 | 21.2 | 103.289 | 31.741 | 21.2 | 0.00 | 0.00 | 0.00 | 0.00 | 0.00 | 0.00 |
| 1580 | 103.290 | 31.689 | 20.8 | 103.261 | 31.663 | 20.8 | 103.232 | 31.689 | 21.2 | 103.260 | 31.715 | 21.2 | 0.00 | 0.00 | 0.00 | 0.00 | 0.00 | 0.00 |
| 1581 | 103.261 | 31.663 | 20.8 | 103.232 | 31.637 | 20.8 | 103.203 | 31.663 | 21.2 | 103.232 | 31.689 | 21.2 | 0.00 | 0.00 | 0.00 | 0.00 | 0.00 | 0.00 |
| 1582 | 103.232 | 31.637 | 20.8 | 103.203 | 31.611 | 20.8 | 103.174 | 31.637 | 21.2 | 103.203 | 31.663 | 21.2 | 0.00 | 0.00 | 0.00 | 0.00 | 0.00 | 0.00 |
| 1583 | 103.203 | 31.611 | 20.8 | 103.174 | 31.585 | 20.8 | 103.145 | 31.611 | 21.2 | 103.174 | 31.637 | 21.2 | 0.00 | 0.00 | 0.00 | 0.00 | 0.00 | 0.00 |
| 1584 | 103.174 | 31.585 | 20.8 | 103.145 | 31.559 | 20.8 | 103.116 | 31.585 | 21.2 | 103.145 | 31.611 | 21.2 | 0.00 | 0.00 | 0.00 | 0.00 | 0.00 | 0.00 |
| 1585 | 103.145 | 31.559 | 20.8 | 103.116 | 31.533 | 20.8 | 103.087 | 31.559 | 21.2 | 103.116 | 31.585 | 21.2 | 0.00 | 0.16 | 0.16 | 0.00 | 0.08 | 0.08 |
| 1586 | 103.116 | 31.533 | 20.8 | 103.088 | 31.507 | 20.8 | 103.058 | 31.533 | 21.2 | 103.087 | 31.559 | 21.2 | 0.00 | 0.51 | 0.51 | 0.00 | 0.12 | 0.12 |
| 1587 | 103.088 | 31.507 | 20.8 | 103.059 | 31.481 | 20.8 | 103.029 | 31.507 | 21.2 | 103.058 | 31.533 | 21.2 | 0.00 | 0.87 | 0.87 | 0.00 | 0.16 | 0.16 |
| 1588 | 103.059 | 31.481 | 20.8 | 103.030 | 31.455 | 20.8 | 103.001 | 31.481 | 21.2 | 103.029 | 31.507 | 21.2 | 0.00 | 0.91 | 0.91 | 0.00 | 0.15 | 0.15 |
| 1589 | 103.030 | 31.455 | 20.8 | 103.001 | 31.429 | 20.8 | 102.972 | 31.455 | 21.2 | 103.001 | 31.481 | 21.2 | 0.00 | 0.57 | 0.57 | 0.00 | 0.13 | 0.13 |
| 1590 | 103.001 | 31.429 | 20.8 | 102.972 | 31.403 | 20.8 | 102.943 | 31.429 | 21.2 | 102.972 | 31.455 | 21.2 | 0.00 | 0.13 | 0.13 | 0.06 | 0.09 | 0.11 |
| 1591 | 102.972 | 31.403 | 20.8 | 102.943 | 31.377 | 20.8 | 102.914 | 31.403 | 21.2 | 102.943 | 31.429 | 21.2 | 0.07 | 0.00 | 0.07 | 0.00 | 0.00 | 0.00 |
| 1592 | 102.943 | 31.377 | 20.8 | 102.914 | 31.351 | 20.8 | 102.885 | 31.377 | 21.2 | 102.914 | 31.403 | 21.2 | 0.26 | 0.00 | 0.26 | 0.06 | 0.00 | 0.06 |
| 1593 | 102.914 | 31.351 | 20.8 | 102.885 | 31.325 | 20.8 | 102.856 | 31.351 | 21.2 | 102.885 | 31.377 | 21.2 | 0.42 | 0.00 | 0.42 | 0.08 | 0.00 | 0.08 |
| 1594 | 102.885 | 31.325 | 20.8 | 102.857 | 31.299 | 20.8 | 102.828 | 31.325 | 21.2 | 102.856 | 31.351 | 21.2 | 0.53 | 0.00 | 0.53 | 0.11 | 0.00 | 0.11 |
| 1595 | 102.857 | 31.299 | 20.8 | 102.828 | 31.273 | 20.8 | 102.799 | 31.299 | 21.2 | 102.828 | 31.325 | 21.2 | 0.60 | 0.00 | 0.60 | 0.15 | 0.00 | 0.15 |
| 1596 | 102.828 | 31.273 | 20.8 | 102.799 | 31.247 | 20.8 | 102.770 | 31.273 | 21.2 | 102.799 | 31.299 | 21.2 | 0.59 | 0.00 | 0.59 | 0.19 | 0.00 | 0.19 |
| 1597 | 102.799 | 31.247 | 20.8 | 102.770 | 31.221 | 20.8 | 102.741 | 31.247 | 21.2 | 102.770 | 31.273 | 21.2 | 0.44 | 0.00 | 0.44 | 0.20 | 0.00 | 0.20 |
| 1598 | 102.770 | 31.221 | 20.8 | 102.741 | 31.195 | 20.8 | 102.712 | 31.221 | 21.2 | 102.741 | 31.247 | 21.2 | 0.17 | 0.00 | 0.17 | 0.15 | 0.00 | 0.15 |
| 1599 | 102.741 | 31.195 | 20.8 | 102.712 | 31.169 | 20.8 | 102.683 | 31.195 | 21.2 | 102.712 | 31.221 | 21.2 | 0.00 | 0.00 | 0.00 | 0.05 | 0.00 | 0.05 |
| 1600 | 102.712 | 31.169 | 20.8 | 102.683 | 31.143 | 20.8 | 102.654 | 31.169 | 21.2 | 102.683 | 31.195 | 21.2 | 0.00 | 0.00 | 0.00 | 0.00 | 0.01 | 0.01 |
| 1601 | 102.683 | 31.143 | 20.8 | 102.655 | 31.117 | 20.8 | 102.626 | 31.142 | 21.2 | 102.654 | 31.169 | 21.2 | 0.00 | 0.20 | 0.20 | 0.00 | 0.11 | 0.11 |
| 1602 | 102.655 | 31.117 | 20.8 | 102.626 | 31.091 | 20.8 | 102.597 | 31.116 | 21.2 | 102.626 | 31.142 | 21.2 | 0.44 | 0.50 | 0.67 | 0.19 | 0.25 | 0.31 |
| 1603 | 103.981 | 32.364 | 21.2 | 103.952 | 32.338 | 21.2 | 103.923 | 32.364 | 21.6 | 103.952 | 32.390 | 21.6 | 0.12 | 0.14 | 0.18 | 0.16 | 0.17 | 0.23 |
| 1604 | 103.952 | 32.338 | 21.2 | 103.923 | 32.312 | 21.2 | 103.894 | 32.338 | 21.6 | 103.923 | 32.364 | 21.6 | 0.00 | 0.00 | 0.00 | 0.00 | 0.03 | 0.03 |
| 1605 | 103.923 | 32.312 | 21.2 | 103.894 | 32.286 | 21.2 | 103.865 | 32.312 | 21.6 | 103.894 | 32.338 | 21.6 | 0.32 | 0.00 | 0.32 | 0.09 | 0.00 | 0.09 |
| 1606 | 103.894 | 32.286 | 21.2 | 103.865 | 32.260 | 21.2 | 103.836 | 32.286 | 21.6 | 103.865 | 32.312 | 21.6 | 0.71 | 0.00 | 0.71 | 0.11 | 0.00 | 0.11 |
| 1607 | 103.865 | 32.260 | 21.2 | 103.836 | 32.234 | 21.2 | 103.807 | 32.260 | 21.6 | 103.836 | 32.286 | 21.6 | 1.00 | 0.03 | 1.00 | 0.09 | 0.07 | 0.11 |
| 1608 | 103.836 | 32.234 | 21.2 | 103.808 | 32.208 | 21.2 | 103.778 | 32.234 | 21.6 | 103.807 | 32.260 | 21.6 | 1.00 | 0.28 | 1.04 | 0.09 | 0.16 | 0.18 |
| 1609 | 103.808 | 32.208 | 21.2 | 103.779 | 32.182 | 21.2 | 103.749 | 32.208 | 21.6 | 103.778 | 32.234 | 21.6 | 0.92 | 0.45 | 1.02 | 0.12 | 0.19 | 0.22 |
| 1610 | 103.779 | 32.182 | 21.2 | 103.750 | 32.156 | 21.2 | 103.721 | 32.182 | 21.6 | 103.749 | 32.208 | 21.6 | 0.75 | 0.44 | 0.87 | 0.12 | 0.17 | 0.21 |
| 1611 | 103.750 | 32.156 | 21.2 | 103.721 | 32.130 | 21.2 | 103.692 | 32.156 | 21.6 | 103.721 | 32.182 | 21.6 | 0.71 | 0.28 | 0.76 | 0.12 | 0.15 | 0.19 |
| 1612 | 103.721 | 32.130 | 21.2 | 103.692 | 32.104 | 21.2 | 103.663 | 32.130 | 21.6 | 103.692 | 32.156 | 21.6 | 0.85 | 0.05 | 0.85 | 0.13 | 0.11 | 0.17 |
| 1613 | 103.692 | 32.104 | 21.2 | 103.663 | 32.078 | 21.2 | 103.634 | 32.104 | 21.6 | 103.663 | 32.130 | 21.6 | 1.00 | 0.00 | 1.00 | 0.12 | 0.03 | 0.12 |
| 1614 | 103.663 | 32.078 | 21.2 | 103.634 | 32.052 | 21.2 | 103.605 | 32.078 | 21.6 | 103.634 | 32.104 | 21.6 | 1.00 | 0.00 | 1.00 | 0.11 | 0.00 | 0.11 |

|      |         |        |      |         |        |      |         |        |      |         |        |      |      |      |      |      |      |      |
|------|---------|--------|------|---------|--------|------|---------|--------|------|---------|--------|------|------|------|------|------|------|------|
| 1615 | 103.634 | 32.052 | 21.2 | 103.605 | 32.026 | 21.2 | 103.576 | 32.051 | 21.6 | 103.605 | 32.078 | 21.6 | 0.96 | 0.00 | 0.96 | 0.08 | 0.00 | 0.08 |
| 1616 | 103.605 | 32.026 | 21.2 | 103.577 | 32.000 | 21.2 | 103.547 | 32.026 | 21.6 | 103.576 | 32.051 | 21.6 | 0.76 | 0.00 | 0.76 | 0.09 | 0.00 | 0.09 |
| 1617 | 103.577 | 32.000 | 21.2 | 103.548 | 31.974 | 21.2 | 103.519 | 32.000 | 21.6 | 103.547 | 32.026 | 21.6 | 0.59 | 0.00 | 0.59 | 0.08 | 0.00 | 0.08 |
| 1618 | 103.548 | 31.974 | 21.2 | 103.519 | 31.948 | 21.2 | 103.490 | 31.974 | 21.6 | 103.519 | 32.000 | 21.6 | 0.60 | 0.00 | 0.60 | 0.00 | 0.00 | 0.00 |
| 1619 | 103.519 | 31.948 | 21.2 | 103.490 | 31.922 | 21.2 | 103.461 | 31.948 | 21.6 | 103.490 | 31.974 | 21.6 | 0.69 | 0.00 | 0.69 | 0.03 | 0.00 | 0.03 |
| 1620 | 103.490 | 31.922 | 21.2 | 103.461 | 31.896 | 21.2 | 103.432 | 31.922 | 21.6 | 103.461 | 31.948 | 21.6 | 0.70 | 0.00 | 0.70 | 0.06 | 0.00 | 0.06 |
| 1621 | 103.461 | 31.896 | 21.2 | 103.432 | 31.870 | 21.2 | 103.403 | 31.895 | 21.6 | 103.432 | 31.922 | 21.6 | 0.53 | 0.00 | 0.53 | 0.02 | 0.00 | 0.02 |
| 1622 | 103.432 | 31.870 | 21.2 | 103.403 | 31.844 | 21.2 | 103.374 | 31.869 | 21.6 | 103.403 | 31.895 | 21.6 | 0.39 | 0.00 | 0.39 | 0.00 | 0.00 | 0.00 |
| 1623 | 103.403 | 31.844 | 21.2 | 103.374 | 31.818 | 21.2 | 103.345 | 31.843 | 21.6 | 103.374 | 31.869 | 21.6 | 0.16 | 0.00 | 0.16 | 0.00 | 0.00 | 0.00 |
| 1624 | 103.374 | 31.818 | 21.2 | 103.346 | 31.792 | 21.2 | 103.317 | 31.817 | 21.6 | 103.345 | 31.843 | 21.6 | 0.00 | 0.00 | 0.00 | 0.00 | 0.00 | 0.00 |
| 1625 | 103.346 | 31.792 | 21.2 | 103.317 | 31.766 | 21.2 | 103.288 | 31.791 | 21.6 | 103.317 | 31.817 | 21.6 | 0.00 | 0.00 | 0.00 | 0.00 | 0.00 | 0.00 |
| 1626 | 103.317 | 31.766 | 21.2 | 103.288 | 31.740 | 21.2 | 103.259 | 31.765 | 21.6 | 103.288 | 31.791 | 21.6 | 0.00 | 0.00 | 0.00 | 0.00 | 0.00 | 0.00 |
| 1627 | 103.288 | 31.740 | 21.2 | 103.259 | 31.714 | 21.2 | 103.230 | 31.739 | 21.6 | 103.259 | 31.765 | 21.6 | 0.00 | 0.00 | 0.00 | 0.00 | 0.00 | 0.00 |
| 1628 | 103.259 | 31.714 | 21.2 | 103.230 | 31.688 | 21.2 | 103.201 | 31.713 | 21.6 | 103.230 | 31.739 | 21.6 | 0.00 | 0.00 | 0.00 | 0.00 | 0.00 | 0.00 |
| 1629 | 103.230 | 31.688 | 21.2 | 103.201 | 31.662 | 21.2 | 103.172 | 31.687 | 21.6 | 103.201 | 31.713 | 21.6 | 0.00 | 0.00 | 0.00 | 0.00 | 0.00 | 0.00 |
| 1630 | 103.201 | 31.662 | 21.2 | 103.172 | 31.636 | 21.2 | 103.143 | 31.661 | 21.6 | 103.172 | 31.687 | 21.6 | 0.00 | 0.00 | 0.00 | 0.00 | 0.00 | 0.00 |
| 1631 | 103.172 | 31.636 | 21.2 | 103.144 | 31.610 | 21.2 | 103.115 | 31.635 | 21.6 | 103.143 | 31.661 | 21.6 | 0.00 | 0.00 | 0.00 | 0.00 | 0.00 | 0.00 |
| 1632 | 103.144 | 31.610 | 21.2 | 103.115 | 31.584 | 21.2 | 103.086 | 31.609 | 21.6 | 103.115 | 31.635 | 21.6 | 0.00 | 0.00 | 0.00 | 0.00 | 0.00 | 0.00 |
| 1633 | 103.115 | 31.584 | 21.2 | 103.086 | 31.558 | 21.2 | 103.057 | 31.583 | 21.6 | 103.086 | 31.609 | 21.6 | 0.00 | 0.00 | 0.00 | 0.00 | 0.00 | 0.00 |
| 1634 | 103.086 | 31.558 | 21.2 | 103.057 | 31.532 | 21.2 | 103.028 | 31.557 | 21.6 | 103.057 | 31.583 | 21.6 | 0.00 | 0.00 | 0.00 | 0.00 | 0.02 | 0.02 |
| 1635 | 103.057 | 31.532 | 21.2 | 103.028 | 31.506 | 21.2 | 102.999 | 31.531 | 21.6 | 103.028 | 31.557 | 21.6 | 0.00 | 0.20 | 0.20 | 0.00 | 0.10 | 0.10 |
| 1636 | 103.028 | 31.506 | 21.2 | 102.999 | 31.480 | 21.2 | 102.970 | 31.505 | 21.6 | 102.999 | 31.531 | 21.6 | 0.00 | 0.34 | 0.34 | 0.00 | 0.13 | 0.13 |
| 1637 | 102.999 | 31.480 | 21.2 | 102.970 | 31.453 | 21.2 | 102.941 | 31.479 | 21.6 | 102.970 | 31.505 | 21.6 | 0.00 | 0.27 | 0.27 | 0.00 | 0.11 | 0.11 |
| 1638 | 102.970 | 31.453 | 21.2 | 102.942 | 31.427 | 21.2 | 102.912 | 31.453 | 21.6 | 102.941 | 31.479 | 21.6 | 0.00 | 0.11 | 0.11 | 0.00 | 0.09 | 0.09 |
| 1639 | 102.942 | 31.427 | 21.2 | 102.913 | 31.401 | 21.2 | 102.884 | 31.427 | 21.6 | 102.912 | 31.453 | 21.6 | 0.00 | 0.08 | 0.08 | 0.00 | 0.08 | 0.08 |
| 1640 | 102.913 | 31.401 | 21.2 | 102.884 | 31.375 | 21.2 | 102.855 | 31.401 | 21.6 | 102.884 | 31.427 | 21.6 | 0.00 | 0.12 | 0.12 | 0.00 | 0.09 | 0.09 |
| 1641 | 102.884 | 31.375 | 21.2 | 102.855 | 31.349 | 21.2 | 102.826 | 31.375 | 21.6 | 102.855 | 31.401 | 21.6 | 0.00 | 0.15 | 0.15 | 0.01 | 0.09 | 0.09 |
| 1642 | 102.855 | 31.349 | 21.2 | 102.826 | 31.323 | 21.2 | 102.797 | 31.349 | 21.6 | 102.826 | 31.375 | 21.6 | 0.00 | 0.14 | 0.14 | 0.06 | 0.10 | 0.12 |
| 1643 | 102.826 | 31.323 | 21.2 | 102.797 | 31.297 | 21.2 | 102.768 | 31.323 | 21.6 | 102.797 | 31.349 | 21.6 | 0.00 | 0.07 | 0.07 | 0.10 | 0.09 | 0.13 |
| 1644 | 102.797 | 31.297 | 21.2 | 102.768 | 31.271 | 21.2 | 102.739 | 31.297 | 21.6 | 102.768 | 31.323 | 21.6 | 0.00 | 0.00 | 0.00 | 0.13 | 0.05 | 0.14 |
| 1645 | 102.768 | 31.271 | 21.2 | 102.740 | 31.245 | 21.2 | 102.710 | 31.271 | 21.6 | 102.739 | 31.297 | 21.6 | 0.00 | 0.00 | 0.00 | 0.12 | 0.01 | 0.12 |
| 1646 | 102.740 | 31.245 | 21.2 | 102.711 | 31.219 | 21.2 | 102.682 | 31.245 | 21.6 | 102.710 | 31.271 | 21.6 | 0.00 | 0.00 | 0.00 | 0.06 | 0.00 | 0.06 |
| 1647 | 102.711 | 31.219 | 21.2 | 102.682 | 31.193 | 21.2 | 102.653 | 31.219 | 21.6 | 102.682 | 31.245 | 21.6 | 0.00 | 0.00 | 0.00 | 0.01 | 0.00 | 0.01 |
| 1648 | 102.682 | 31.193 | 21.2 | 102.653 | 31.167 | 21.2 | 102.624 | 31.193 | 21.6 | 102.653 | 31.219 | 21.6 | 0.00 | 0.00 | 0.00 | 0.00 | 0.00 | 0.00 |
| 1649 | 102.653 | 31.167 | 21.2 | 102.624 | 31.141 | 21.2 | 102.595 | 31.167 | 21.6 | 102.624 | 31.193 | 21.6 | 0.00 | 0.00 | 0.00 | 0.00 | 0.01 | 0.01 |
| 1650 | 102.624 | 31.141 | 21.2 | 102.595 | 31.115 | 21.2 | 102.566 | 31.141 | 21.6 | 102.595 | 31.167 | 21.6 | 0.24 | 0.09 | 0.26 | 0.26 | 0.14 | 0.30 |
| 1651 | 103.950 | 32.389 | 21.6 | 103.921 | 32.362 | 21.6 | 103.892 | 32.389 | 22.0 | 103.921 | 32.414 | 22.0 | 0.00 | 0.00 | 0.00 | 0.19 | 0.12 | 0.22 |
| 1652 | 103.921 | 32.362 | 21.6 | 103.892 | 32.337 | 21.6 | 103.863 | 32.362 | 22.0 | 103.892 | 32.389 | 22.0 | 0.00 | 0.00 | 0.00 | 0.00 | 0.05 | 0.05 |
| 1653 | 103.892 | 32.337 | 21.6 | 103.864 | 32.310 | 21.6 | 103.835 | 32.337 | 22.0 | 103.863 | 32.362 | 22.0 | 0.00 | 0.00 | 0.00 | 0.02 | 0.02 | 0.03 |

|      |         |        |      |         |        |      |         |        |      |         |        |      |      |      |      |      |      |      |
|------|---------|--------|------|---------|--------|------|---------|--------|------|---------|--------|------|------|------|------|------|------|------|
| 1654 | 103.864 | 32.310 | 21.6 | 103.835 | 32.285 | 21.6 | 103.806 | 32.310 | 22.0 | 103.835 | 32.336 | 22.0 | 0.26 | 0.00 | 0.26 | 0.10 | 0.05 | 0.11 |
| 1655 | 103.835 | 32.285 | 21.6 | 103.806 | 32.258 | 21.6 | 103.777 | 32.284 | 22.0 | 103.806 | 32.310 | 22.0 | 0.52 | 0.26 | 0.59 | 0.10 | 0.12 | 0.16 |
| 1656 | 103.806 | 32.258 | 21.6 | 103.777 | 32.233 | 21.6 | 103.748 | 32.258 | 22.0 | 103.777 | 32.284 | 22.0 | 0.53 | 0.73 | 0.90 | 0.10 | 0.15 | 0.18 |
| 1657 | 103.777 | 32.233 | 21.6 | 103.748 | 32.206 | 21.6 | 103.719 | 32.232 | 22.0 | 103.748 | 32.258 | 22.0 | 0.35 | 1.00 | 1.06 | 0.11 | 0.10 | 0.15 |
| 1658 | 103.748 | 32.206 | 21.6 | 103.719 | 32.180 | 21.6 | 103.690 | 32.206 | 22.0 | 103.719 | 32.232 | 22.0 | 0.13 | 1.00 | 1.01 | 0.08 | 0.10 | 0.13 |
| 1659 | 103.719 | 32.180 | 21.6 | 103.690 | 32.154 | 21.6 | 103.661 | 32.180 | 22.0 | 103.690 | 32.206 | 22.0 | 0.07 | 0.80 | 0.80 | 0.08 | 0.17 | 0.19 |
| 1660 | 103.690 | 32.154 | 21.6 | 103.662 | 32.128 | 21.6 | 103.632 | 32.154 | 22.0 | 103.661 | 32.180 | 22.0 | 0.22 | 0.35 | 0.41 | 0.12 | 0.20 | 0.23 |
| 1661 | 103.662 | 32.128 | 21.6 | 103.633 | 32.102 | 21.6 | 103.604 | 32.128 | 22.0 | 103.632 | 32.154 | 22.0 | 0.41 | 0.00 | 0.41 | 0.14 | 0.13 | 0.19 |
| 1662 | 103.633 | 32.102 | 21.6 | 103.604 | 32.076 | 21.6 | 103.575 | 32.102 | 22.0 | 103.604 | 32.128 | 22.0 | 0.48 | 0.00 | 0.48 | 0.11 | 0.03 | 0.11 |
| 1663 | 103.604 | 32.076 | 21.6 | 103.575 | 32.050 | 21.6 | 103.546 | 32.076 | 22.0 | 103.575 | 32.102 | 22.0 | 0.40 | 0.00 | 0.40 | 0.05 | 0.00 | 0.05 |
| 1664 | 103.575 | 32.050 | 21.6 | 103.546 | 32.024 | 21.6 | 103.517 | 32.050 | 22.0 | 103.546 | 32.076 | 22.0 | 0.20 | 0.00 | 0.20 | 0.13 | 0.00 | 0.13 |
| 1665 | 103.546 | 32.024 | 21.6 | 103.517 | 31.998 | 21.6 | 103.488 | 32.024 | 22.0 | 103.517 | 32.050 | 22.0 | 0.06 | 0.00 | 0.06 | 0.11 | 0.00 | 0.11 |
| 1666 | 103.517 | 31.998 | 21.6 | 103.488 | 31.972 | 21.6 | 103.459 | 31.998 | 22.0 | 103.488 | 32.024 | 22.0 | 0.10 | 0.00 | 0.10 | 0.03 | 0.00 | 0.03 |
| 1667 | 103.488 | 31.972 | 21.6 | 103.460 | 31.946 | 21.6 | 103.430 | 31.972 | 22.0 | 103.459 | 31.998 | 22.0 | 0.24 | 0.00 | 0.24 | 0.07 | 0.00 | 0.07 |
| 1668 | 103.460 | 31.946 | 21.6 | 103.431 | 31.920 | 21.6 | 103.401 | 31.946 | 22.0 | 103.430 | 31.972 | 22.0 | 0.29 | 0.00 | 0.29 | 0.12 | 0.00 | 0.12 |
| 1669 | 103.431 | 31.920 | 21.6 | 103.402 | 31.894 | 21.6 | 103.373 | 31.920 | 22.0 | 103.401 | 31.946 | 22.0 | 0.16 | 0.00 | 0.16 | 0.06 | 0.00 | 0.06 |
| 1670 | 103.402 | 31.894 | 21.6 | 103.373 | 31.868 | 21.6 | 103.344 | 31.894 | 22.0 | 103.373 | 31.920 | 22.0 | 0.00 | 0.00 | 0.00 | 0.00 | 0.00 | 0.00 |
| 1671 | 103.373 | 31.868 | 21.6 | 103.344 | 31.842 | 21.6 | 103.315 | 31.868 | 22.0 | 103.344 | 31.894 | 22.0 | 0.00 | 0.00 | 0.00 | 0.00 | 0.00 | 0.00 |
| 1672 | 103.344 | 31.842 | 21.6 | 103.315 | 31.816 | 21.6 | 103.286 | 31.842 | 22.0 | 103.315 | 31.868 | 22.0 | 0.00 | 0.00 | 0.00 | 0.00 | 0.00 | 0.00 |
| 1673 | 103.315 | 31.816 | 21.6 | 103.286 | 31.790 | 21.6 | 103.257 | 31.816 | 22.0 | 103.286 | 31.842 | 22.0 | 0.00 | 0.00 | 0.00 | 0.00 | 0.01 | 0.01 |
| 1674 | 103.286 | 31.790 | 21.6 | 103.257 | 31.764 | 21.6 | 103.228 | 31.790 | 22.0 | 103.257 | 31.816 | 22.0 | 0.00 | 0.00 | 0.00 | 0.00 | 0.01 | 0.01 |
| 1675 | 103.257 | 31.764 | 21.6 | 103.229 | 31.738 | 21.6 | 103.200 | 31.764 | 22.0 | 103.228 | 31.790 | 22.0 | 0.00 | 0.00 | 0.00 | 0.00 | 0.02 | 0.02 |
| 1676 | 103.229 | 31.738 | 21.6 | 103.200 | 31.712 | 21.6 | 103.171 | 31.738 | 22.0 | 103.200 | 31.764 | 22.0 | 0.00 | 0.00 | 0.00 | 0.00 | 0.05 | 0.05 |
| 1677 | 103.200 | 31.712 | 21.6 | 103.171 | 31.686 | 21.6 | 103.142 | 31.712 | 22.0 | 103.171 | 31.738 | 22.0 | 0.00 | 0.09 | 0.09 | 0.00 | 0.12 | 0.12 |
| 1678 | 103.171 | 31.686 | 21.6 | 103.142 | 31.660 | 21.6 | 103.113 | 31.686 | 22.0 | 103.142 | 31.712 | 22.0 | 0.00 | 0.26 | 0.26 | 0.00 | 0.15 | 0.15 |
| 1679 | 103.142 | 31.660 | 21.6 | 103.113 | 31.634 | 21.6 | 103.084 | 31.660 | 22.0 | 103.113 | 31.686 | 22.0 | 0.00 | 0.40 | 0.40 | 0.00 | 0.14 | 0.14 |
| 1680 | 103.113 | 31.634 | 21.6 | 103.084 | 31.608 | 21.6 | 103.055 | 31.634 | 22.0 | 103.084 | 31.660 | 22.0 | 0.00 | 0.46 | 0.46 | 0.00 | 0.13 | 0.13 |
| 1681 | 103.084 | 31.608 | 21.6 | 103.055 | 31.582 | 21.6 | 103.026 | 31.608 | 22.0 | 103.055 | 31.634 | 22.0 | 0.00 | 0.45 | 0.45 | 0.00 | 0.13 | 0.13 |
| 1682 | 103.055 | 31.582 | 21.6 | 103.026 | 31.556 | 21.6 | 102.998 | 31.582 | 22.0 | 103.026 | 31.608 | 22.0 | 0.00 | 0.46 | 0.46 | 0.00 | 0.14 | 0.14 |
| 1683 | 103.026 | 31.556 | 21.6 | 102.998 | 31.530 | 21.6 | 102.969 | 31.556 | 22.0 | 102.998 | 31.582 | 22.0 | 0.00 | 0.61 | 0.61 | 0.00 | 0.15 | 0.15 |
| 1684 | 102.998 | 31.530 | 21.6 | 102.969 | 31.504 | 21.6 | 102.940 | 31.530 | 22.0 | 102.969 | 31.556 | 22.0 | 0.00 | 0.75 | 0.75 | 0.00 | 0.14 | 0.14 |
| 1685 | 102.969 | 31.504 | 21.6 | 102.940 | 31.478 | 21.6 | 102.911 | 31.504 | 22.0 | 102.940 | 31.530 | 22.0 | 0.00 | 0.79 | 0.79 | 0.00 | 0.12 | 0.12 |
| 1686 | 102.940 | 31.478 | 21.6 | 102.911 | 31.452 | 21.6 | 102.882 | 31.478 | 22.0 | 102.911 | 31.504 | 22.0 | 0.00 | 0.77 | 0.77 | 0.00 | 0.10 | 0.10 |
| 1687 | 102.911 | 31.452 | 21.6 | 102.882 | 31.426 | 21.6 | 102.853 | 31.452 | 22.0 | 102.882 | 31.478 | 22.0 | 0.00 | 0.78 | 0.78 | 0.00 | 0.10 | 0.10 |
| 1688 | 102.882 | 31.426 | 21.6 | 102.853 | 31.400 | 21.6 | 102.824 | 31.426 | 22.0 | 102.853 | 31.452 | 22.0 | 0.00 | 0.81 | 0.81 | 0.00 | 0.10 | 0.10 |
| 1689 | 102.853 | 31.400 | 21.6 | 102.825 | 31.374 | 21.6 | 102.795 | 31.400 | 22.0 | 102.824 | 31.426 | 22.0 | 0.00 | 0.84 | 0.84 | 0.00 | 0.10 | 0.10 |
| 1690 | 102.825 | 31.374 | 21.6 | 102.796 | 31.348 | 21.6 | 102.767 | 31.374 | 22.0 | 102.795 | 31.400 | 22.0 | 0.00 | 0.81 | 0.81 | 0.01 | 0.13 | 0.13 |
| 1691 | 102.796 | 31.348 | 21.6 | 102.767 | 31.322 | 21.6 | 102.738 | 31.348 | 22.0 | 102.767 | 31.374 | 22.0 | 0.00 | 0.70 | 0.70 | 0.04 | 0.18 | 0.18 |
| 1692 | 102.767 | 31.322 | 21.6 | 102.738 | 31.296 | 21.6 | 102.709 | 31.322 | 22.0 | 102.738 | 31.348 | 22.0 | 0.00 | 0.46 | 0.46 | 0.06 | 0.21 | 0.22 |

|      |         |        |      |         |        |      |         |        |      |         |        |      |      |      |      |      |      |      |
|------|---------|--------|------|---------|--------|------|---------|--------|------|---------|--------|------|------|------|------|------|------|------|
| 1693 | 102.738 | 31.296 | 21.6 | 102.709 | 31.270 | 21.6 | 102.680 | 31.296 | 22.0 | 102.709 | 31.322 | 22.0 | 0.00 | 0.18 | 0.18 | 0.07 | 0.18 | 0.19 |
| 1694 | 102.709 | 31.270 | 21.6 | 102.680 | 31.244 | 21.6 | 102.651 | 31.270 | 22.0 | 102.680 | 31.296 | 22.0 | 0.00 | 0.00 | 0.00 | 0.04 | 0.09 | 0.10 |
| 1695 | 102.680 | 31.244 | 21.6 | 102.651 | 31.218 | 21.6 | 102.622 | 31.244 | 22.0 | 102.651 | 31.270 | 22.0 | 0.00 | 0.00 | 0.00 | 0.02 | 0.02 | 0.03 |
| 1696 | 102.651 | 31.218 | 21.6 | 102.623 | 31.192 | 21.6 | 102.593 | 31.218 | 22.0 | 102.622 | 31.244 | 22.0 | 0.00 | 0.00 | 0.00 | 0.00 | 0.00 | 0.00 |
| 1697 | 102.623 | 31.192 | 21.6 | 102.594 | 31.166 | 21.6 | 102.565 | 31.191 | 22.0 | 102.593 | 31.218 | 22.0 | 0.00 | 0.00 | 0.00 | 0.00 | 0.01 | 0.01 |
| 1698 | 102.594 | 31.166 | 21.6 | 102.565 | 31.140 | 21.6 | 102.536 | 31.165 | 22.0 | 102.565 | 31.191 | 22.0 | 0.17 | 0.00 | 0.17 | 0.16 | 0.09 | 0.18 |
| 1699 | 103.920 | 32.413 | 22.0 | 103.891 | 32.387 | 22.0 | 103.862 | 32.413 | 22.4 | 103.891 | 32.439 | 22.4 | 0.00 | 0.00 | 0.00 | 0.00 | 0.12 | 0.12 |
| 1700 | 103.891 | 32.387 | 22.0 | 103.862 | 32.361 | 22.0 | 103.833 | 32.387 | 22.4 | 103.862 | 32.413 | 22.4 | 0.00 | 0.00 | 0.00 | 0.00 | 0.10 | 0.10 |
| 1701 | 103.862 | 32.361 | 22.0 | 103.833 | 32.335 | 22.0 | 103.804 | 32.361 | 22.4 | 103.833 | 32.387 | 22.4 | 0.00 | 0.00 | 0.00 | 0.00 | 0.09 | 0.09 |
| 1702 | 103.833 | 32.335 | 22.0 | 103.804 | 32.309 | 22.0 | 103.775 | 32.335 | 22.4 | 103.804 | 32.361 | 22.4 | 0.00 | 0.06 | 0.06 | 0.00 | 0.12 | 0.12 |
| 1703 | 103.804 | 32.309 | 22.0 | 103.775 | 32.283 | 22.0 | 103.746 | 32.309 | 22.4 | 103.775 | 32.335 | 22.4 | 0.00 | 0.38 | 0.38 | 0.00 | 0.16 | 0.16 |
| 1704 | 103.775 | 32.283 | 22.0 | 103.746 | 32.257 | 22.0 | 103.717 | 32.283 | 22.4 | 103.746 | 32.309 | 22.4 | 0.00 | 0.80 | 0.80 | 0.00 | 0.13 | 0.13 |
| 1705 | 103.746 | 32.257 | 22.0 | 103.718 | 32.231 | 22.0 | 103.689 | 32.257 | 22.4 | 103.717 | 32.283 | 22.4 | 0.00 | 1.00 | 1.00 | 0.00 | 0.06 | 0.06 |
| 1706 | 103.718 | 32.231 | 22.0 | 103.689 | 32.205 | 22.0 | 103.660 | 32.231 | 22.4 | 103.689 | 32.257 | 22.4 | 0.00 | 1.00 | 1.00 | 0.00 | 0.06 | 0.06 |
| 1707 | 103.689 | 32.205 | 22.0 | 103.660 | 32.179 | 22.0 | 103.631 | 32.205 | 22.4 | 103.660 | 32.231 | 22.4 | 0.00 | 0.86 | 0.86 | 0.00 | 0.13 | 0.13 |
| 1708 | 103.660 | 32.179 | 22.0 | 103.631 | 32.153 | 22.0 | 103.602 | 32.179 | 22.4 | 103.631 | 32.205 | 22.4 | 0.00 | 0.47 | 0.47 | 0.00 | 0.20 | 0.20 |
| 1709 | 103.631 | 32.153 | 22.0 | 103.602 | 32.127 | 22.0 | 103.573 | 32.153 | 22.4 | 103.602 | 32.179 | 22.4 | 0.00 | 0.09 | 0.09 | 0.00 | 0.17 | 0.17 |
| 1710 | 103.602 | 32.127 | 22.0 | 103.573 | 32.101 | 22.0 | 103.544 | 32.127 | 22.4 | 103.573 | 32.153 | 22.4 | 0.00 | 0.00 | 0.00 | 0.00 | 0.07 | 0.07 |
| 1711 | 103.573 | 32.101 | 22.0 | 103.544 | 32.075 | 22.0 | 103.515 | 32.101 | 22.4 | 103.544 | 32.127 | 22.4 | 0.00 | 0.00 | 0.00 | 0.00 | 0.02 | 0.02 |
| 1712 | 103.544 | 32.075 | 22.0 | 103.516 | 32.049 | 22.0 | 103.486 | 32.075 | 22.4 | 103.515 | 32.101 | 22.4 | 0.00 | 0.00 | 0.00 | 0.11 | 0.01 | 0.11 |
| 1713 | 103.516 | 32.049 | 22.0 | 103.487 | 32.023 | 22.0 | 103.458 | 32.049 | 22.4 | 103.486 | 32.075 | 22.4 | 0.00 | 0.00 | 0.00 | 0.08 | 0.00 | 0.08 |
| 1714 | 103.487 | 32.023 | 22.0 | 103.458 | 31.997 | 22.0 | 103.429 | 32.023 | 22.4 | 103.458 | 32.049 | 22.4 | 0.00 | 0.00 | 0.00 | 0.03 | 0.00 | 0.03 |
| 1715 | 103.458 | 31.997 | 22.0 | 103.429 | 31.971 | 22.0 | 103.400 | 31.997 | 22.4 | 103.429 | 32.023 | 22.4 | 0.00 | 0.00 | 0.00 | 0.07 | 0.02 | 0.07 |
| 1716 | 103.429 | 31.971 | 22.0 | 103.400 | 31.945 | 22.0 | 103.371 | 31.971 | 22.4 | 103.400 | 31.997 | 22.4 | 0.00 | 0.00 | 0.00 | 0.11 | 0.05 | 0.12 |
| 1717 | 103.400 | 31.945 | 22.0 | 103.371 | 31.919 | 22.0 | 103.342 | 31.945 | 22.4 | 103.371 | 31.971 | 22.4 | 0.00 | 0.00 | 0.00 | 0.07 | 0.09 | 0.11 |
| 1718 | 103.371 | 31.919 | 22.0 | 103.342 | 31.893 | 22.0 | 103.313 | 31.919 | 22.4 | 103.342 | 31.945 | 22.4 | 0.00 | 0.00 | 0.00 | 0.00 | 0.11 | 0.11 |
| 1719 | 103.342 | 31.893 | 22.0 | 103.314 | 31.867 | 22.0 | 103.284 | 31.893 | 22.4 | 103.313 | 31.919 | 22.4 | 0.00 | 0.00 | 0.00 | 0.00 | 0.12 | 0.12 |
| 1720 | 103.314 | 31.867 | 22.0 | 103.285 | 31.841 | 22.0 | 103.256 | 31.867 | 22.4 | 103.284 | 31.893 | 22.4 | 0.00 | 0.00 | 0.00 | 0.00 | 0.12 | 0.12 |
| 1721 | 103.285 | 31.841 | 22.0 | 103.256 | 31.815 | 22.0 | 103.227 | 31.841 | 22.4 | 103.256 | 31.867 | 22.4 | 0.00 | 0.00 | 0.00 | 0.00 | 0.11 | 0.11 |
| 1722 | 103.256 | 31.815 | 22.0 | 103.227 | 31.789 | 22.0 | 103.198 | 31.815 | 22.4 | 103.227 | 31.841 | 22.4 | 0.00 | 0.00 | 0.00 | 0.00 | 0.11 | 0.11 |
| 1723 | 103.227 | 31.789 | 22.0 | 103.198 | 31.763 | 22.0 | 103.169 | 31.789 | 22.4 | 103.198 | 31.815 | 22.4 | 0.00 | 0.05 | 0.05 | 0.00 | 0.12 | 0.12 |
| 1724 | 103.198 | 31.763 | 22.0 | 103.169 | 31.737 | 22.0 | 103.140 | 31.762 | 22.4 | 103.169 | 31.789 | 22.4 | 0.00 | 0.16 | 0.16 | 0.00 | 0.17 | 0.17 |
| 1725 | 103.169 | 31.737 | 22.0 | 103.140 | 31.711 | 22.0 | 103.111 | 31.736 | 22.4 | 103.140 | 31.762 | 22.4 | 0.00 | 0.35 | 0.35 | 0.00 | 0.21 | 0.21 |
| 1726 | 103.140 | 31.711 | 22.0 | 103.112 | 31.685 | 22.0 | 103.082 | 31.710 | 22.4 | 103.111 | 31.736 | 22.4 | 0.00 | 0.58 | 0.58 | 0.00 | 0.22 | 0.22 |
| 1727 | 103.112 | 31.685 | 22.0 | 103.083 | 31.659 | 22.0 | 103.053 | 31.684 | 22.4 | 103.082 | 31.710 | 22.4 | 0.00 | 0.76 | 0.76 | 0.00 | 0.19 | 0.19 |
| 1728 | 103.083 | 31.659 | 22.0 | 103.054 | 31.633 | 22.0 | 103.025 | 31.658 | 22.4 | 103.053 | 31.684 | 22.4 | 0.00 | 0.84 | 0.84 | 0.00 | 0.18 | 0.18 |
| 1729 | 103.054 | 31.633 | 22.0 | 103.025 | 31.607 | 22.0 | 102.996 | 31.632 | 22.4 | 103.025 | 31.658 | 22.4 | 0.00 | 0.87 | 0.87 | 0.00 | 0.18 | 0.18 |
| 1730 | 103.025 | 31.607 | 22.0 | 102.996 | 31.581 | 22.0 | 102.967 | 31.606 | 22.4 | 102.996 | 31.632 | 22.4 | 0.00 | 0.90 | 0.90 | 0.00 | 0.19 | 0.19 |
| 1731 | 102.996 | 31.581 | 22.0 | 102.967 | 31.555 | 22.0 | 102.938 | 31.580 | 22.4 | 102.967 | 31.606 | 22.4 | 0.00 | 0.98 | 0.98 | 0.00 | 0.17 | 0.17 |

|      |         |        |      |         |        |      |         |        |      |         |        |      |      |      |      |      |      |      |
|------|---------|--------|------|---------|--------|------|---------|--------|------|---------|--------|------|------|------|------|------|------|------|
| 1732 | 102.967 | 31.555 | 22.0 | 102.938 | 31.529 | 22.0 | 102.909 | 31.554 | 22.4 | 102.938 | 31.580 | 22.4 | 0.00 | 1.00 | 1.00 | 0.00 | 0.13 | 0.13 |
| 1733 | 102.938 | 31.529 | 22.0 | 102.909 | 31.503 | 22.0 | 102.880 | 31.528 | 22.4 | 102.909 | 31.554 | 22.4 | 0.00 | 1.00 | 1.00 | 0.00 | 0.07 | 0.07 |
| 1734 | 102.909 | 31.503 | 22.0 | 102.881 | 31.477 | 22.0 | 102.852 | 31.502 | 22.4 | 102.880 | 31.528 | 22.4 | 0.00 | 1.00 | 1.00 | 0.00 | 0.03 | 0.03 |
| 1735 | 102.881 | 31.477 | 22.0 | 102.852 | 31.451 | 22.0 | 102.823 | 31.476 | 22.4 | 102.852 | 31.502 | 22.4 | 0.00 | 1.00 | 1.00 | 0.00 | 0.02 | 0.02 |
| 1736 | 102.852 | 31.451 | 22.0 | 102.823 | 31.424 | 22.0 | 102.794 | 31.450 | 22.4 | 102.823 | 31.476 | 22.4 | 0.00 | 1.00 | 1.00 | 0.00 | 0.01 | 0.01 |
| 1737 | 102.823 | 31.424 | 22.0 | 102.794 | 31.398 | 22.0 | 102.765 | 31.424 | 22.4 | 102.794 | 31.450 | 22.4 | 0.00 | 1.00 | 1.00 | 0.00 | 0.02 | 0.02 |
| 1738 | 102.794 | 31.398 | 22.0 | 102.765 | 31.372 | 22.0 | 102.736 | 31.398 | 22.4 | 102.765 | 31.424 | 22.4 | 0.00 | 1.00 | 1.00 | 0.00 | 0.05 | 0.05 |
| 1739 | 102.765 | 31.372 | 22.0 | 102.736 | 31.346 | 22.0 | 102.707 | 31.372 | 22.4 | 102.736 | 31.398 | 22.4 | 0.00 | 1.00 | 1.00 | 0.00 | 0.13 | 0.13 |
| 1740 | 102.736 | 31.346 | 22.0 | 102.707 | 31.320 | 22.0 | 102.678 | 31.346 | 22.4 | 102.707 | 31.372 | 22.4 | 0.00 | 0.79 | 0.79 | 0.00 | 0.22 | 0.22 |
| 1741 | 102.707 | 31.320 | 22.0 | 102.679 | 31.294 | 22.0 | 102.650 | 31.320 | 22.4 | 102.678 | 31.346 | 22.4 | 0.00 | 0.49 | 0.49 | 0.00 | 0.25 | 0.25 |
| 1742 | 102.679 | 31.294 | 22.0 | 102.650 | 31.268 | 22.0 | 102.621 | 31.294 | 22.4 | 102.650 | 31.320 | 22.4 | 0.00 | 0.22 | 0.22 | 0.00 | 0.20 | 0.20 |
| 1743 | 102.650 | 31.268 | 22.0 | 102.621 | 31.242 | 22.0 | 102.592 | 31.268 | 22.4 | 102.621 | 31.294 | 22.4 | 0.00 | 0.08 | 0.08 | 0.00 | 0.12 | 0.12 |
| 1744 | 102.621 | 31.242 | 22.0 | 102.592 | 31.216 | 22.0 | 102.563 | 31.242 | 22.4 | 102.592 | 31.268 | 22.4 | 0.00 | 0.00 | 0.00 | 0.00 | 0.07 | 0.07 |
| 1745 | 102.592 | 31.216 | 22.0 | 102.563 | 31.190 | 22.0 | 102.534 | 31.216 | 22.4 | 102.563 | 31.242 | 22.4 | 0.00 | 0.00 | 0.00 | 0.00 | 0.05 | 0.05 |
| 1746 | 102.563 | 31.190 | 22.0 | 102.534 | 31.164 | 22.0 | 102.505 | 31.190 | 22.4 | 102.534 | 31.216 | 22.4 | 0.00 | 0.00 | 0.00 | 0.00 | 0.06 | 0.06 |

#

# Pengguan Fault

#

| Sub-Fault No | Upper-left corner |          |            | Upper-right corner |          |            | Lower-right corner |          |            | Lower-left corner |          |            | Slip Estimate |         |          | Uncertainty |         |          |
|--------------|-------------------|----------|------------|--------------------|----------|------------|--------------------|----------|------------|-------------------|----------|------------|---------------|---------|----------|-------------|---------|----------|
|              | Long. deg         | Lat. deg | Depth (km) | Long. deg          | Lat. deg | Depth (km) | Long. deg          | Lat. deg | Depth (km) | Long. deg         | Lat. deg | Depth (km) | Str. (m)      | Dip (m) | Amp. (m) | Str. (m)    | Dip (m) | Amp. (m) |

#

|      |         |        |     |         |        |     |         |        |     |         |        |     |      |      |      |      |      |      |
|------|---------|--------|-----|---------|--------|-----|---------|--------|-----|---------|--------|-----|------|------|------|------|------|------|
| 1747 | 104.588 | 31.860 | 0.0 | 104.560 | 31.833 | 0.0 | 104.542 | 31.850 | 1.6 | 104.570 | 31.877 | 1.6 | 0.00 | 0.11 | 0.11 | 0.00 | 0.10 | 0.10 |
| 1748 | 104.560 | 31.833 | 0.0 | 104.532 | 31.806 | 0.0 | 104.514 | 31.823 | 1.6 | 104.542 | 31.850 | 1.6 | 0.00 | 0.00 | 0.00 | 0.00 | 0.08 | 0.08 |
| 1749 | 104.532 | 31.806 | 0.0 | 104.504 | 31.780 | 0.0 | 104.486 | 31.797 | 1.6 | 104.514 | 31.823 | 1.6 | 0.00 | 0.00 | 0.00 | 0.00 | 0.00 | 0.00 |
| 1750 | 104.504 | 31.780 | 0.0 | 104.476 | 31.753 | 0.0 | 104.458 | 31.770 | 1.6 | 104.486 | 31.797 | 1.6 | 0.00 | 0.76 | 0.76 | 0.00 | 0.14 | 0.14 |
| 1751 | 104.476 | 31.753 | 0.0 | 104.448 | 31.727 | 0.0 | 104.430 | 31.743 | 1.6 | 104.458 | 31.770 | 1.6 | 0.00 | 0.03 | 0.03 | 0.00 | 0.11 | 0.11 |
| 1752 | 104.448 | 31.727 | 0.0 | 104.420 | 31.700 | 0.0 | 104.402 | 31.717 | 1.6 | 104.430 | 31.743 | 1.6 | 0.26 | 0.81 | 0.85 | 0.04 | 0.03 | 0.05 |
| 1753 | 104.420 | 31.700 | 0.0 | 104.392 | 31.673 | 0.0 | 104.374 | 31.690 | 1.6 | 104.402 | 31.717 | 1.6 | 0.00 | 4.30 | 4.30 | 0.00 | 0.17 | 0.17 |
| 1754 | 104.392 | 31.673 | 0.0 | 104.364 | 31.646 | 0.0 | 104.346 | 31.663 | 1.6 | 104.374 | 31.690 | 1.6 | 0.00 | 4.54 | 4.54 | 0.00 | 0.13 | 0.13 |
| 1755 | 104.364 | 31.646 | 0.0 | 104.336 | 31.620 | 0.0 | 104.318 | 31.637 | 1.6 | 104.346 | 31.663 | 1.6 | 0.00 | 1.76 | 1.76 | 0.00 | 0.09 | 0.09 |
| 1756 | 104.336 | 31.620 | 0.0 | 104.308 | 31.593 | 0.0 | 104.290 | 31.610 | 1.6 | 104.318 | 31.637 | 1.6 | 0.06 | 0.90 | 0.90 | 0.04 | 0.11 | 0.12 |
| 1757 | 104.308 | 31.593 | 0.0 | 104.280 | 31.567 | 0.0 | 104.262 | 31.583 | 1.6 | 104.290 | 31.610 | 1.6 | 0.20 | 0.59 | 0.62 | 0.05 | 0.02 | 0.05 |
| 1758 | 104.280 | 31.567 | 0.0 | 104.252 | 31.540 | 0.0 | 104.234 | 31.557 | 1.6 | 104.262 | 31.583 | 1.6 | 0.00 | 1.64 | 1.64 | 0.00 | 0.15 | 0.15 |
| 1759 | 104.252 | 31.540 | 0.0 | 104.224 | 31.513 | 0.0 | 104.206 | 31.530 | 1.6 | 104.234 | 31.557 | 1.6 | 0.00 | 0.00 | 0.00 | 0.00 | 0.00 | 0.00 |
| 1760 | 104.224 | 31.513 | 0.0 | 104.195 | 31.486 | 0.0 | 104.178 | 31.503 | 1.6 | 104.206 | 31.530 | 1.6 | 0.00 | 0.00 | 0.00 | 0.00 | 0.00 | 0.00 |

|      |         |        |     |         |        |     |         |        |     |         |        |     |      |      |      |      |      |      |
|------|---------|--------|-----|---------|--------|-----|---------|--------|-----|---------|--------|-----|------|------|------|------|------|------|
| 1761 | 104.195 | 31.486 | 0.0 | 104.168 | 31.460 | 0.0 | 104.150 | 31.477 | 1.6 | 104.178 | 31.503 | 1.6 | 0.00 | 0.00 | 0.00 | 0.00 | 0.01 | 0.01 |
| 1762 | 104.168 | 31.460 | 0.0 | 104.139 | 31.433 | 0.0 | 104.122 | 31.450 | 1.6 | 104.150 | 31.477 | 1.6 | 0.00 | 0.07 | 0.07 | 0.00 | 0.16 | 0.16 |
| 1763 | 104.139 | 31.433 | 0.0 | 104.111 | 31.407 | 0.0 | 104.094 | 31.423 | 1.6 | 104.122 | 31.450 | 1.6 | 2.77 | 2.32 | 3.62 | 0.20 | 0.16 | 0.26 |
| 1764 | 104.111 | 31.407 | 0.0 | 104.083 | 31.380 | 0.0 | 104.066 | 31.397 | 1.6 | 104.094 | 31.423 | 1.6 | 3.25 | 5.65 | 6.52 | 0.21 | 0.16 | 0.26 |
| 1765 | 104.083 | 31.380 | 0.0 | 104.055 | 31.353 | 0.0 | 104.038 | 31.370 | 1.6 | 104.066 | 31.397 | 1.6 | 0.16 | 6.00 | 6.00 | 0.09 | 0.01 | 0.09 |
| 1766 | 104.055 | 31.353 | 0.0 | 104.027 | 31.326 | 0.0 | 104.010 | 31.343 | 1.6 | 104.038 | 31.370 | 1.6 | 0.10 | 4.97 | 4.97 | 0.08 | 0.16 | 0.18 |
| 1767 | 104.027 | 31.326 | 0.0 | 103.999 | 31.300 | 0.0 | 103.981 | 31.317 | 1.6 | 104.010 | 31.343 | 1.6 | 0.20 | 2.98 | 2.99 | 0.07 | 0.15 | 0.17 |
| 1768 | 103.999 | 31.300 | 0.0 | 103.971 | 31.273 | 0.0 | 103.954 | 31.290 | 1.6 | 103.981 | 31.317 | 1.6 | 0.40 | 2.70 | 2.72 | 0.06 | 0.10 | 0.12 |
| 1769 | 103.971 | 31.273 | 0.0 | 103.943 | 31.247 | 0.0 | 103.925 | 31.263 | 1.6 | 103.954 | 31.290 | 1.6 | 0.00 | 3.91 | 3.91 | 0.00 | 0.14 | 0.14 |
| 1770 | 103.943 | 31.247 | 0.0 | 103.915 | 31.220 | 0.0 | 103.897 | 31.237 | 1.6 | 103.925 | 31.263 | 1.6 | 0.00 | 3.46 | 3.46 | 0.00 | 0.21 | 0.21 |
| 1771 | 103.915 | 31.220 | 0.0 | 103.887 | 31.193 | 0.0 | 103.869 | 31.210 | 1.6 | 103.897 | 31.237 | 1.6 | 0.00 | 2.37 | 2.37 | 0.00 | 0.09 | 0.09 |
| 1772 | 103.887 | 31.193 | 0.0 | 103.859 | 31.166 | 0.0 | 103.841 | 31.183 | 1.6 | 103.869 | 31.210 | 1.6 | 0.00 | 1.18 | 1.18 | 0.00 | 0.08 | 0.08 |
| 1773 | 103.859 | 31.166 | 0.0 | 103.831 | 31.140 | 0.0 | 103.813 | 31.157 | 1.6 | 103.841 | 31.183 | 1.6 | 0.00 | 0.00 | 0.00 | 0.00 | 0.00 | 0.00 |
| 1774 | 103.831 | 31.140 | 0.0 | 103.803 | 31.113 | 0.0 | 103.785 | 31.130 | 1.6 | 103.813 | 31.157 | 1.6 | 0.00 | 0.00 | 0.00 | 0.04 | 0.03 | 0.05 |
| 1775 | 103.803 | 31.113 | 0.0 | 103.775 | 31.087 | 0.0 | 103.757 | 31.103 | 1.6 | 103.785 | 31.130 | 1.6 | 0.00 | 0.50 | 0.50 | 0.00 | 0.06 | 0.06 |
| 1776 | 103.775 | 31.087 | 0.0 | 103.747 | 31.060 | 0.0 | 103.729 | 31.076 | 1.6 | 103.757 | 31.103 | 1.6 | 0.00 | 0.98 | 0.98 | 0.00 | 0.21 | 0.21 |
| 1777 | 103.747 | 31.060 | 0.0 | 103.719 | 31.033 | 0.0 | 103.701 | 31.050 | 1.6 | 103.729 | 31.076 | 1.6 | 0.00 | 0.00 | 0.00 | 0.00 | 0.00 | 0.00 |
| 1778 | 103.719 | 31.033 | 0.0 | 103.691 | 31.006 | 0.0 | 103.673 | 31.023 | 1.6 | 103.701 | 31.050 | 1.6 | 0.00 | 0.00 | 0.00 | 0.09 | 0.02 | 0.09 |
| 1779 | 103.691 | 31.006 | 0.0 | 103.663 | 30.980 | 0.0 | 103.645 | 30.997 | 1.6 | 103.673 | 31.023 | 1.6 | 0.38 | 0.48 | 0.61 | 0.00 | 0.03 | 0.03 |
| 1780 | 103.663 | 30.980 | 0.0 | 103.635 | 30.953 | 0.0 | 103.617 | 30.970 | 1.6 | 103.645 | 30.997 | 1.6 | 0.00 | 0.00 | 0.00 | 0.01 | 0.03 | 0.03 |
| 1781 | 103.635 | 30.953 | 0.0 | 103.607 | 30.927 | 0.0 | 103.589 | 30.943 | 1.6 | 103.617 | 30.970 | 1.6 | 0.00 | 1.26 | 1.26 | 0.00 | 0.16 | 0.16 |
| 1782 | 103.607 | 30.927 | 0.0 | 103.579 | 30.900 | 0.0 | 103.561 | 30.916 | 1.6 | 103.589 | 30.943 | 1.6 | 0.00 | 1.43 | 1.43 | 0.00 | 0.13 | 0.13 |
| 1783 | 103.579 | 30.900 | 0.0 | 103.551 | 30.873 | 0.0 | 103.533 | 30.890 | 1.6 | 103.561 | 30.916 | 1.6 | 0.07 | 0.00 | 0.07 | 0.01 | 0.00 | 0.01 |
| 1784 | 103.551 | 30.873 | 0.0 | 103.523 | 30.846 | 0.0 | 103.505 | 30.863 | 1.6 | 103.533 | 30.890 | 1.6 | 0.18 | 0.49 | 0.53 | 0.05 | 0.08 | 0.09 |
| 1785 | 103.523 | 30.846 | 0.0 | 103.495 | 30.820 | 0.0 | 103.477 | 30.837 | 1.6 | 103.505 | 30.863 | 1.6 | 0.07 | 0.00 | 0.07 | 0.03 | 0.02 | 0.04 |
| 1786 | 103.495 | 30.820 | 0.0 | 103.467 | 30.793 | 0.0 | 103.449 | 30.810 | 1.6 | 103.477 | 30.837 | 1.6 | 0.00 | 0.00 | 0.00 | 0.07 | 0.00 | 0.07 |
| 1787 | 103.467 | 30.793 | 0.0 | 103.439 | 30.767 | 0.0 | 103.421 | 30.783 | 1.6 | 103.449 | 30.810 | 1.6 | 0.00 | 0.00 | 0.00 | 0.00 | 0.00 | 0.00 |
| 1788 | 103.439 | 30.767 | 0.0 | 103.411 | 30.740 | 0.0 | 103.393 | 30.756 | 1.6 | 103.421 | 30.783 | 1.6 | 0.03 | 0.00 | 0.03 | 0.00 | 0.03 | 0.03 |
| 1789 | 103.411 | 30.740 | 0.0 | 103.383 | 30.713 | 0.0 | 103.365 | 30.730 | 1.6 | 103.393 | 30.756 | 1.6 | 0.00 | 0.47 | 0.47 | 0.00 | 0.09 | 0.09 |
| 1790 | 103.383 | 30.713 | 0.0 | 103.355 | 30.686 | 0.0 | 103.337 | 30.703 | 1.6 | 103.365 | 30.730 | 1.6 | 0.00 | 0.64 | 0.64 | 0.00 | 0.09 | 0.09 |
| 1791 | 103.355 | 30.686 | 0.0 | 103.326 | 30.660 | 0.0 | 103.309 | 30.677 | 1.6 | 103.337 | 30.703 | 1.6 | 0.00 | 0.24 | 0.24 | 0.00 | 0.09 | 0.09 |
| 1792 | 104.568 | 31.875 | 1.6 | 104.540 | 31.848 | 1.6 | 104.523 | 31.865 | 3.3 | 104.551 | 31.892 | 3.3 | 0.00 | 0.00 | 0.00 | 0.00 | 0.00 | 0.00 |
| 1793 | 104.540 | 31.848 | 1.6 | 104.512 | 31.822 | 1.6 | 104.495 | 31.839 | 3.3 | 104.523 | 31.865 | 3.3 | 0.00 | 0.73 | 0.73 | 0.00 | 0.12 | 0.12 |
| 1794 | 104.512 | 31.822 | 1.6 | 104.484 | 31.795 | 1.6 | 104.466 | 31.812 | 3.3 | 104.495 | 31.839 | 3.3 | 0.24 | 0.00 | 0.24 | 0.00 | 0.00 | 0.00 |
| 1795 | 104.484 | 31.795 | 1.6 | 104.456 | 31.768 | 1.6 | 104.439 | 31.785 | 3.3 | 104.466 | 31.812 | 3.3 | 0.00 | 0.00 | 0.00 | 0.00 | 0.00 | 0.00 |
| 1796 | 104.456 | 31.768 | 1.6 | 104.428 | 31.742 | 1.6 | 104.410 | 31.759 | 3.3 | 104.439 | 31.785 | 3.3 | 0.00 | 0.00 | 0.00 | 0.00 | 0.00 | 0.00 |
| 1797 | 104.428 | 31.742 | 1.6 | 104.400 | 31.715 | 1.6 | 104.382 | 31.732 | 3.3 | 104.410 | 31.759 | 3.3 | 0.00 | 0.46 | 0.46 | 0.00 | 0.03 | 0.03 |
| 1798 | 104.400 | 31.715 | 1.6 | 104.372 | 31.688 | 1.6 | 104.354 | 31.705 | 3.3 | 104.382 | 31.732 | 3.3 | 0.00 | 3.33 | 3.33 | 0.00 | 0.18 | 0.18 |
| 1799 | 104.372 | 31.688 | 1.6 | 104.344 | 31.662 | 1.6 | 104.326 | 31.678 | 3.3 | 104.354 | 31.705 | 3.3 | 0.00 | 3.79 | 3.79 | 0.00 | 0.15 | 0.15 |

|      |         |        |     |         |        |     |         |        |     |         |        |     |      |      |      |      |      |      |
|------|---------|--------|-----|---------|--------|-----|---------|--------|-----|---------|--------|-----|------|------|------|------|------|------|
| 1800 | 104.344 | 31.662 | 1.6 | 104.316 | 31.635 | 1.6 | 104.298 | 31.652 | 3.3 | 104.326 | 31.678 | 3.3 | 0.00 | 1.83 | 1.83 | 0.00 | 0.09 | 0.09 |
| 1801 | 104.316 | 31.635 | 1.6 | 104.288 | 31.608 | 1.6 | 104.270 | 31.625 | 3.3 | 104.298 | 31.652 | 3.3 | 0.00 | 1.38 | 1.38 | 0.00 | 0.07 | 0.07 |
| 1802 | 104.288 | 31.608 | 1.6 | 104.260 | 31.582 | 1.6 | 104.242 | 31.599 | 3.3 | 104.270 | 31.625 | 3.3 | 0.00 | 0.89 | 0.89 | 0.00 | 0.06 | 0.06 |
| 1803 | 104.260 | 31.582 | 1.6 | 104.232 | 31.555 | 1.6 | 104.214 | 31.572 | 3.3 | 104.242 | 31.599 | 3.3 | 0.77 | 1.82 | 1.98 | 0.11 | 0.14 | 0.18 |
| 1804 | 104.232 | 31.555 | 1.6 | 104.204 | 31.528 | 1.6 | 104.186 | 31.545 | 3.3 | 104.214 | 31.572 | 3.3 | 1.08 | 0.00 | 1.08 | 0.16 | 0.00 | 0.16 |
| 1805 | 104.204 | 31.528 | 1.6 | 104.176 | 31.502 | 1.6 | 104.158 | 31.518 | 3.3 | 104.186 | 31.545 | 3.3 | 0.00 | 0.00 | 0.00 | 0.00 | 0.00 | 0.00 |
| 1806 | 104.176 | 31.502 | 1.6 | 104.148 | 31.475 | 1.6 | 104.130 | 31.492 | 3.3 | 104.158 | 31.518 | 3.3 | 0.00 | 0.09 | 0.09 | 0.00 | 0.06 | 0.06 |
| 1807 | 104.148 | 31.475 | 1.6 | 104.120 | 31.448 | 1.6 | 104.102 | 31.465 | 3.3 | 104.130 | 31.492 | 3.3 | 0.00 | 0.96 | 0.96 | 0.00 | 0.09 | 0.09 |
| 1808 | 104.120 | 31.448 | 1.6 | 104.092 | 31.422 | 1.6 | 104.074 | 31.439 | 3.3 | 104.102 | 31.465 | 3.3 | 3.17 | 2.57 | 4.08 | 0.10 | 0.08 | 0.13 |
| 1809 | 104.092 | 31.422 | 1.6 | 104.064 | 31.395 | 1.6 | 104.046 | 31.412 | 3.3 | 104.074 | 31.439 | 3.3 | 3.90 | 4.56 | 6.00 | 0.12 | 0.17 | 0.21 |
| 1810 | 104.064 | 31.395 | 1.6 | 104.036 | 31.368 | 1.6 | 104.018 | 31.385 | 3.3 | 104.046 | 31.412 | 3.3 | 0.89 | 6.00 | 6.07 | 0.06 | 0.01 | 0.06 |
| 1811 | 104.036 | 31.368 | 1.6 | 104.008 | 31.342 | 1.6 | 103.990 | 31.358 | 3.3 | 104.018 | 31.385 | 3.3 | 0.62 | 4.84 | 4.88 | 0.01 | 0.15 | 0.15 |
| 1812 | 104.008 | 31.342 | 1.6 | 103.980 | 31.315 | 1.6 | 103.962 | 31.332 | 3.3 | 103.990 | 31.358 | 3.3 | 0.15 | 2.28 | 2.28 | 0.00 | 0.19 | 0.19 |
| 1813 | 103.980 | 31.315 | 1.6 | 103.952 | 31.288 | 1.6 | 103.934 | 31.305 | 3.3 | 103.962 | 31.332 | 3.3 | 0.00 | 1.65 | 1.65 | 0.00 | 0.15 | 0.15 |
| 1814 | 103.952 | 31.288 | 1.6 | 103.924 | 31.262 | 1.6 | 103.906 | 31.278 | 3.3 | 103.934 | 31.305 | 3.3 | 0.00 | 2.48 | 2.48 | 0.00 | 0.18 | 0.18 |
| 1815 | 103.924 | 31.262 | 1.6 | 103.896 | 31.235 | 1.6 | 103.878 | 31.252 | 3.3 | 103.906 | 31.278 | 3.3 | 0.00 | 2.35 | 2.35 | 0.00 | 0.15 | 0.15 |
| 1816 | 103.896 | 31.235 | 1.6 | 103.868 | 31.208 | 1.6 | 103.850 | 31.225 | 3.3 | 103.878 | 31.252 | 3.3 | 0.00 | 1.41 | 1.41 | 0.00 | 0.07 | 0.07 |
| 1817 | 103.868 | 31.208 | 1.6 | 103.840 | 31.182 | 1.6 | 103.822 | 31.198 | 3.3 | 103.850 | 31.225 | 3.3 | 0.00 | 1.74 | 1.74 | 0.00 | 0.20 | 0.20 |
| 1818 | 103.840 | 31.182 | 1.6 | 103.811 | 31.155 | 1.6 | 103.794 | 31.172 | 3.3 | 103.822 | 31.198 | 3.3 | 0.00 | 0.13 | 0.13 | 0.00 | 0.18 | 0.18 |
| 1819 | 103.811 | 31.155 | 1.6 | 103.784 | 31.128 | 1.6 | 103.766 | 31.145 | 3.3 | 103.794 | 31.172 | 3.3 | 0.00 | 0.31 | 0.31 | 0.00 | 0.16 | 0.16 |
| 1820 | 103.784 | 31.128 | 1.6 | 103.755 | 31.102 | 1.6 | 103.738 | 31.118 | 3.3 | 103.766 | 31.145 | 3.3 | 0.15 | 0.68 | 0.70 | 0.08 | 0.10 | 0.13 |
| 1821 | 103.755 | 31.102 | 1.6 | 103.727 | 31.075 | 1.6 | 103.710 | 31.092 | 3.3 | 103.738 | 31.118 | 3.3 | 0.00 | 1.06 | 1.06 | 0.00 | 0.15 | 0.15 |
| 1822 | 103.727 | 31.075 | 1.6 | 103.699 | 31.048 | 1.6 | 103.682 | 31.065 | 3.3 | 103.710 | 31.092 | 3.3 | 0.00 | 0.10 | 0.10 | 0.00 | 0.03 | 0.03 |
| 1823 | 103.699 | 31.048 | 1.6 | 103.671 | 31.022 | 1.6 | 103.653 | 31.038 | 3.3 | 103.682 | 31.065 | 3.3 | 0.26 | 0.73 | 0.77 | 0.07 | 0.24 | 0.25 |
| 1824 | 103.671 | 31.022 | 1.6 | 103.643 | 30.995 | 1.6 | 103.626 | 31.012 | 3.3 | 103.653 | 31.038 | 3.3 | 0.00 | 0.02 | 0.02 | 0.00 | 0.07 | 0.07 |
| 1825 | 103.643 | 30.995 | 1.6 | 103.615 | 30.968 | 1.6 | 103.597 | 30.985 | 3.3 | 103.626 | 31.012 | 3.3 | 0.00 | 0.00 | 0.00 | 0.00 | 0.00 | 0.00 |
| 1826 | 103.615 | 30.968 | 1.6 | 103.587 | 30.942 | 1.6 | 103.569 | 30.958 | 3.3 | 103.597 | 30.985 | 3.3 | 0.00 | 0.34 | 0.34 | 0.00 | 0.11 | 0.11 |
| 1827 | 103.587 | 30.942 | 1.6 | 103.559 | 30.915 | 1.6 | 103.541 | 30.932 | 3.3 | 103.569 | 30.958 | 3.3 | 0.00 | 0.28 | 0.28 | 0.01 | 0.12 | 0.12 |
| 1828 | 103.559 | 30.915 | 1.6 | 103.531 | 30.888 | 1.6 | 103.513 | 30.905 | 3.3 | 103.541 | 30.932 | 3.3 | 0.61 | 0.00 | 0.61 | 0.10 | 0.00 | 0.10 |
| 1829 | 103.531 | 30.888 | 1.6 | 103.503 | 30.862 | 1.6 | 103.485 | 30.878 | 3.3 | 103.513 | 30.905 | 3.3 | 0.00 | 0.00 | 0.00 | 0.00 | 0.00 | 0.00 |
| 1830 | 103.503 | 30.862 | 1.6 | 103.475 | 30.835 | 1.6 | 103.457 | 30.852 | 3.3 | 103.485 | 30.878 | 3.3 | 0.00 | 0.01 | 0.01 | 0.00 | 0.04 | 0.04 |
| 1831 | 103.475 | 30.835 | 1.6 | 103.447 | 30.808 | 1.6 | 103.429 | 30.825 | 3.3 | 103.457 | 30.852 | 3.3 | 0.00 | 0.00 | 0.00 | 0.00 | 0.01 | 0.01 |
| 1832 | 103.447 | 30.808 | 1.6 | 103.419 | 30.782 | 1.6 | 103.401 | 30.798 | 3.3 | 103.429 | 30.825 | 3.3 | 0.00 | 0.46 | 0.46 | 0.00 | 0.06 | 0.06 |
| 1833 | 103.419 | 30.782 | 1.6 | 103.391 | 30.755 | 1.6 | 103.373 | 30.772 | 3.3 | 103.401 | 30.798 | 3.3 | 0.00 | 0.07 | 0.07 | 0.00 | 0.11 | 0.11 |
| 1834 | 103.391 | 30.755 | 1.6 | 103.363 | 30.728 | 1.6 | 103.345 | 30.745 | 3.3 | 103.373 | 30.772 | 3.3 | 0.00 | 0.29 | 0.29 | 0.00 | 0.11 | 0.11 |
| 1835 | 103.363 | 30.728 | 1.6 | 103.335 | 30.702 | 1.6 | 103.317 | 30.718 | 3.3 | 103.345 | 30.745 | 3.3 | 0.00 | 0.08 | 0.08 | 0.01 | 0.04 | 0.04 |
| 1836 | 103.335 | 30.702 | 1.6 | 103.307 | 30.675 | 1.6 | 103.289 | 30.692 | 3.3 | 103.317 | 30.718 | 3.3 | 0.00 | 0.00 | 0.00 | 0.00 | 0.00 | 0.00 |
| 1837 | 104.549 | 31.890 | 3.3 | 104.521 | 31.864 | 3.3 | 104.503 | 31.881 | 4.9 | 104.531 | 31.907 | 4.9 | 0.00 | 0.00 | 0.00 | 0.00 | 0.00 | 0.00 |
| 1838 | 104.521 | 31.864 | 3.3 | 104.493 | 31.837 | 3.3 | 104.475 | 31.854 | 4.9 | 104.503 | 31.881 | 4.9 | 0.00 | 0.38 | 0.38 | 0.00 | 0.08 | 0.08 |



|      |         |        |     |         |        |     |         |        |     |         |        |     |      |      |      |      |      |      |
|------|---------|--------|-----|---------|--------|-----|---------|--------|-----|---------|--------|-----|------|------|------|------|------|------|
| 1839 | 104.493 | 31.837 | 3.3 | 104.465 | 31.810 | 3.3 | 104.447 | 31.827 | 4.9 | 104.475 | 31.854 | 4.9 | 0.74 | 0.00 | 0.74 | 0.12 | 0.00 | 0.12 |
| 1840 | 104.465 | 31.810 | 3.3 | 104.437 | 31.784 | 3.3 | 104.419 | 31.800 | 4.9 | 104.447 | 31.827 | 4.9 | 0.00 | 0.00 | 0.00 | 0.00 | 0.00 | 0.00 |
| 1841 | 104.437 | 31.784 | 3.3 | 104.409 | 31.757 | 3.3 | 104.391 | 31.774 | 4.9 | 104.419 | 31.800 | 4.9 | 0.00 | 0.00 | 0.00 | 0.00 | 0.00 | 0.00 |
| 1842 | 104.409 | 31.757 | 3.3 | 104.380 | 31.730 | 3.3 | 104.363 | 31.747 | 4.9 | 104.391 | 31.774 | 4.9 | 0.00 | 0.00 | 0.00 | 0.00 | 0.00 | 0.00 |
| 1843 | 104.380 | 31.730 | 3.3 | 104.353 | 31.704 | 3.3 | 104.335 | 31.720 | 4.9 | 104.363 | 31.747 | 4.9 | 0.00 | 1.20 | 1.20 | 0.00 | 0.11 | 0.11 |
| 1844 | 104.353 | 31.704 | 3.3 | 104.325 | 31.677 | 3.3 | 104.307 | 31.694 | 4.9 | 104.335 | 31.720 | 4.9 | 0.00 | 1.34 | 1.34 | 0.00 | 0.11 | 0.11 |
| 1845 | 104.325 | 31.677 | 3.3 | 104.296 | 31.650 | 3.3 | 104.279 | 31.667 | 4.9 | 104.307 | 31.694 | 4.9 | 0.00 | 0.26 | 0.26 | 0.00 | 0.07 | 0.07 |
| 1846 | 104.296 | 31.650 | 3.3 | 104.268 | 31.624 | 3.3 | 104.251 | 31.640 | 4.9 | 104.279 | 31.667 | 4.9 | 0.00 | 0.00 | 0.00 | 0.00 | 0.07 | 0.07 |
| 1847 | 104.268 | 31.624 | 3.3 | 104.240 | 31.597 | 3.3 | 104.223 | 31.614 | 4.9 | 104.251 | 31.640 | 4.9 | 0.00 | 0.00 | 0.00 | 0.00 | 0.08 | 0.08 |
| 1848 | 104.240 | 31.597 | 3.3 | 104.212 | 31.570 | 3.3 | 104.195 | 31.587 | 4.9 | 104.223 | 31.614 | 4.9 | 0.28 | 0.00 | 0.28 | 0.09 | 0.10 | 0.13 |
| 1849 | 104.212 | 31.570 | 3.3 | 104.184 | 31.544 | 3.3 | 104.166 | 31.560 | 4.9 | 104.195 | 31.587 | 4.9 | 0.04 | 0.00 | 0.04 | 0.14 | 0.00 | 0.14 |
| 1850 | 104.184 | 31.544 | 3.3 | 104.156 | 31.517 | 3.3 | 104.138 | 31.534 | 4.9 | 104.166 | 31.560 | 4.9 | 0.00 | 0.00 | 0.00 | 0.00 | 0.00 | 0.00 |
| 1851 | 104.156 | 31.517 | 3.3 | 104.128 | 31.490 | 3.3 | 104.111 | 31.507 | 4.9 | 104.138 | 31.534 | 4.9 | 0.00 | 0.00 | 0.00 | 0.00 | 0.00 | 0.00 |
| 1852 | 104.128 | 31.490 | 3.3 | 104.100 | 31.464 | 3.3 | 104.082 | 31.480 | 4.9 | 104.111 | 31.507 | 4.9 | 0.00 | 0.00 | 0.00 | 0.00 | 0.00 | 0.00 |
| 1853 | 104.100 | 31.464 | 3.3 | 104.072 | 31.437 | 3.3 | 104.054 | 31.454 | 4.9 | 104.082 | 31.480 | 4.9 | 1.37 | 0.23 | 1.39 | 0.09 | 0.08 | 0.12 |
| 1854 | 104.072 | 31.437 | 3.3 | 104.044 | 31.410 | 3.3 | 104.026 | 31.427 | 4.9 | 104.054 | 31.454 | 4.9 | 2.15 | 1.45 | 2.59 | 0.14 | 0.19 | 0.24 |
| 1855 | 104.044 | 31.410 | 3.3 | 104.016 | 31.384 | 3.3 | 103.998 | 31.400 | 4.9 | 104.026 | 31.427 | 4.9 | 0.55 | 2.35 | 2.42 | 0.14 | 0.14 | 0.20 |
| 1856 | 104.016 | 31.384 | 3.3 | 103.988 | 31.357 | 3.3 | 103.970 | 31.374 | 4.9 | 103.998 | 31.400 | 4.9 | 0.00 | 1.76 | 1.76 | 0.08 | 0.14 | 0.16 |
| 1857 | 103.988 | 31.357 | 3.3 | 103.960 | 31.330 | 3.3 | 103.942 | 31.347 | 4.9 | 103.970 | 31.374 | 4.9 | 0.00 | 0.53 | 0.53 | 0.00 | 0.16 | 0.16 |
| 1858 | 103.960 | 31.330 | 3.3 | 103.932 | 31.303 | 3.3 | 103.914 | 31.320 | 4.9 | 103.942 | 31.347 | 4.9 | 0.00 | 0.31 | 0.31 | 0.00 | 0.15 | 0.15 |
| 1859 | 103.932 | 31.303 | 3.3 | 103.904 | 31.277 | 3.3 | 103.886 | 31.294 | 4.9 | 103.914 | 31.320 | 4.9 | 0.00 | 1.13 | 1.13 | 0.00 | 0.15 | 0.15 |
| 1860 | 103.904 | 31.277 | 3.3 | 103.876 | 31.250 | 3.3 | 103.858 | 31.267 | 4.9 | 103.886 | 31.294 | 4.9 | 0.00 | 2.23 | 2.23 | 0.00 | 0.11 | 0.11 |
| 1861 | 103.876 | 31.250 | 3.3 | 103.848 | 31.224 | 3.3 | 103.830 | 31.240 | 4.9 | 103.858 | 31.267 | 4.9 | 0.00 | 2.96 | 2.96 | 0.00 | 0.10 | 0.10 |
| 1862 | 103.848 | 31.224 | 3.3 | 103.820 | 31.197 | 3.3 | 103.802 | 31.213 | 4.9 | 103.830 | 31.240 | 4.9 | 0.00 | 3.28 | 3.28 | 0.00 | 0.13 | 0.13 |
| 1863 | 103.820 | 31.197 | 3.3 | 103.792 | 31.170 | 3.3 | 103.774 | 31.187 | 4.9 | 103.802 | 31.213 | 4.9 | 0.00 | 0.06 | 0.06 | 0.02 | 0.05 | 0.05 |
| 1864 | 103.792 | 31.170 | 3.3 | 103.764 | 31.143 | 3.3 | 103.746 | 31.160 | 4.9 | 103.774 | 31.187 | 4.9 | 0.00 | 0.00 | 0.00 | 0.00 | 0.00 | 0.00 |
| 1865 | 103.764 | 31.143 | 3.3 | 103.736 | 31.117 | 3.3 | 103.718 | 31.134 | 4.9 | 103.746 | 31.160 | 4.9 | 0.31 | 1.85 | 1.87 | 0.00 | 0.06 | 0.06 |
| 1866 | 103.736 | 31.117 | 3.3 | 103.708 | 31.090 | 3.3 | 103.690 | 31.107 | 4.9 | 103.718 | 31.134 | 4.9 | 0.38 | 2.61 | 2.64 | 0.03 | 0.10 | 0.10 |
| 1867 | 103.708 | 31.090 | 3.3 | 103.680 | 31.063 | 3.3 | 103.662 | 31.080 | 4.9 | 103.690 | 31.107 | 4.9 | 0.00 | 0.70 | 0.70 | 0.00 | 0.09 | 0.09 |
| 1868 | 103.680 | 31.063 | 3.3 | 103.652 | 31.037 | 3.3 | 103.634 | 31.053 | 4.9 | 103.662 | 31.080 | 4.9 | 0.00 | 1.91 | 1.91 | 0.00 | 0.09 | 0.09 |
| 1869 | 103.652 | 31.037 | 3.3 | 103.624 | 31.010 | 3.3 | 103.606 | 31.027 | 4.9 | 103.634 | 31.053 | 4.9 | 0.00 | 0.48 | 0.48 | 0.00 | 0.06 | 0.06 |
| 1870 | 103.624 | 31.010 | 3.3 | 103.596 | 30.983 | 3.3 | 103.578 | 31.000 | 4.9 | 103.606 | 31.027 | 4.9 | 0.00 | 0.38 | 0.38 | 0.00 | 0.00 | 0.00 |
| 1871 | 103.596 | 30.983 | 3.3 | 103.568 | 30.957 | 3.3 | 103.550 | 30.973 | 4.9 | 103.578 | 31.000 | 4.9 | 0.00 | 1.55 | 1.55 | 0.00 | 0.11 | 0.11 |
| 1872 | 103.568 | 30.957 | 3.3 | 103.540 | 30.930 | 3.3 | 103.522 | 30.947 | 4.9 | 103.550 | 30.973 | 4.9 | 0.00 | 1.91 | 1.91 | 0.00 | 0.17 | 0.17 |
| 1873 | 103.540 | 30.930 | 3.3 | 103.512 | 30.903 | 3.3 | 103.494 | 30.920 | 4.9 | 103.522 | 30.947 | 4.9 | 0.00 | 1.32 | 1.32 | 0.00 | 0.15 | 0.15 |
| 1874 | 103.512 | 30.903 | 3.3 | 103.484 | 30.877 | 3.3 | 103.466 | 30.893 | 4.9 | 103.494 | 30.920 | 4.9 | 0.00 | 0.46 | 0.46 | 0.00 | 0.08 | 0.08 |
| 1875 | 103.484 | 30.877 | 3.3 | 103.456 | 30.850 | 3.3 | 103.438 | 30.867 | 4.9 | 103.466 | 30.893 | 4.9 | 0.00 | 0.35 | 0.35 | 0.00 | 0.08 | 0.08 |
| 1876 | 103.456 | 30.850 | 3.3 | 103.427 | 30.823 | 3.3 | 103.410 | 30.840 | 4.9 | 103.438 | 30.867 | 4.9 | 0.00 | 0.11 | 0.11 | 0.00 | 0.09 | 0.09 |
| 1877 | 103.427 | 30.823 | 3.3 | 103.399 | 30.797 | 3.3 | 103.382 | 30.813 | 4.9 | 103.410 | 30.840 | 4.9 | 0.00 | 0.08 | 0.08 | 0.08 | 0.08 | 0.11 |

|      |         |        |     |         |        |     |         |        |     |         |        |     |      |      |      |      |      |      |
|------|---------|--------|-----|---------|--------|-----|---------|--------|-----|---------|--------|-----|------|------|------|------|------|------|
| 1878 | 103.399 | 30.797 | 3.3 | 103.371 | 30.770 | 3.3 | 103.354 | 30.787 | 4.9 | 103.382 | 30.813 | 4.9 | 0.00 | 0.00 | 0.00 | 0.09 | 0.03 | 0.09 |
| 1879 | 103.371 | 30.770 | 3.3 | 103.343 | 30.743 | 3.3 | 103.326 | 30.760 | 4.9 | 103.354 | 30.787 | 4.9 | 0.00 | 0.00 | 0.00 | 0.09 | 0.00 | 0.09 |
| 1880 | 103.343 | 30.743 | 3.3 | 103.315 | 30.717 | 3.3 | 103.298 | 30.733 | 4.9 | 103.326 | 30.760 | 4.9 | 0.00 | 0.00 | 0.00 | 0.00 | 0.00 | 0.00 |
| 1881 | 103.315 | 30.717 | 3.3 | 103.287 | 30.690 | 3.3 | 103.269 | 30.707 | 4.9 | 103.298 | 30.733 | 4.9 | 0.00 | 0.26 | 0.26 | 0.00 | 0.08 | 0.08 |
| 1882 | 104.529 | 31.906 | 4.9 | 104.501 | 31.879 | 4.9 | 104.483 | 31.896 | 6.5 | 104.511 | 31.922 | 6.5 | 0.00 | 0.00 | 0.00 | 0.00 | 0.00 | 0.00 |
| 1883 | 104.501 | 31.879 | 4.9 | 104.473 | 31.852 | 4.9 | 104.455 | 31.869 | 6.5 | 104.483 | 31.896 | 6.5 | 0.00 | 0.00 | 0.00 | 0.00 | 0.00 | 0.00 |
| 1884 | 104.473 | 31.852 | 4.9 | 104.445 | 31.826 | 4.9 | 104.427 | 31.842 | 6.5 | 104.455 | 31.869 | 6.5 | 0.00 | 0.00 | 0.00 | 0.00 | 0.00 | 0.00 |
| 1885 | 104.445 | 31.826 | 4.9 | 104.417 | 31.799 | 4.9 | 104.399 | 31.816 | 6.5 | 104.427 | 31.842 | 6.5 | 0.00 | 0.00 | 0.00 | 0.00 | 0.00 | 0.00 |
| 1886 | 104.417 | 31.799 | 4.9 | 104.389 | 31.772 | 4.9 | 104.371 | 31.789 | 6.5 | 104.399 | 31.816 | 6.5 | 0.00 | 0.00 | 0.00 | 0.00 | 0.00 | 0.00 |
| 1887 | 104.389 | 31.772 | 4.9 | 104.361 | 31.746 | 4.9 | 104.343 | 31.762 | 6.5 | 104.371 | 31.789 | 6.5 | 0.00 | 0.00 | 0.00 | 0.00 | 0.00 | 0.00 |
| 1888 | 104.361 | 31.746 | 4.9 | 104.333 | 31.719 | 4.9 | 104.315 | 31.736 | 6.5 | 104.343 | 31.762 | 6.5 | 0.00 | 0.00 | 0.00 | 0.00 | 0.04 | 0.04 |
| 1889 | 104.333 | 31.719 | 4.9 | 104.305 | 31.692 | 4.9 | 104.287 | 31.709 | 6.5 | 104.315 | 31.736 | 6.5 | 0.00 | 0.00 | 0.00 | 0.00 | 0.07 | 0.07 |
| 1890 | 104.305 | 31.692 | 4.9 | 104.277 | 31.666 | 4.9 | 104.259 | 31.682 | 6.5 | 104.287 | 31.709 | 6.5 | 0.00 | 0.00 | 0.00 | 0.00 | 0.06 | 0.06 |
| 1891 | 104.277 | 31.666 | 4.9 | 104.249 | 31.639 | 4.9 | 104.231 | 31.656 | 6.5 | 104.259 | 31.682 | 6.5 | 0.00 | 0.00 | 0.00 | 0.00 | 0.07 | 0.07 |
| 1892 | 104.249 | 31.639 | 4.9 | 104.221 | 31.612 | 4.9 | 104.203 | 31.629 | 6.5 | 104.231 | 31.656 | 6.5 | 0.00 | 0.00 | 0.00 | 0.00 | 0.08 | 0.08 |
| 1893 | 104.221 | 31.612 | 4.9 | 104.193 | 31.585 | 4.9 | 104.175 | 31.602 | 6.5 | 104.203 | 31.629 | 6.5 | 0.00 | 0.00 | 0.00 | 0.07 | 0.00 | 0.07 |
| 1894 | 104.193 | 31.585 | 4.9 | 104.165 | 31.559 | 4.9 | 104.147 | 31.576 | 6.5 | 104.175 | 31.602 | 6.5 | 0.00 | 0.00 | 0.00 | 0.08 | 0.00 | 0.08 |
| 1895 | 104.165 | 31.559 | 4.9 | 104.137 | 31.532 | 4.9 | 104.119 | 31.549 | 6.5 | 104.147 | 31.576 | 6.5 | 0.00 | 0.00 | 0.00 | 0.01 | 0.00 | 0.01 |
| 1896 | 104.137 | 31.532 | 4.9 | 104.109 | 31.505 | 4.9 | 104.091 | 31.522 | 6.5 | 104.119 | 31.549 | 6.5 | 0.00 | 0.00 | 0.00 | 0.03 | 0.00 | 0.03 |
| 1897 | 104.109 | 31.505 | 4.9 | 104.081 | 31.479 | 4.9 | 104.063 | 31.495 | 6.5 | 104.091 | 31.522 | 6.5 | 0.11 | 0.00 | 0.11 | 0.01 | 0.00 | 0.01 |
| 1898 | 104.081 | 31.479 | 4.9 | 104.053 | 31.452 | 4.9 | 104.035 | 31.469 | 6.5 | 104.063 | 31.495 | 6.5 | 0.62 | 0.00 | 0.62 | 0.07 | 0.00 | 0.07 |
| 1899 | 104.053 | 31.452 | 4.9 | 104.025 | 31.425 | 4.9 | 104.007 | 31.442 | 6.5 | 104.035 | 31.469 | 6.5 | 1.09 | 0.00 | 1.09 | 0.12 | 0.11 | 0.16 |
| 1900 | 104.025 | 31.425 | 4.9 | 103.996 | 31.399 | 4.9 | 103.979 | 31.416 | 6.5 | 104.007 | 31.442 | 6.5 | 0.56 | 0.00 | 0.56 | 0.13 | 0.10 | 0.16 |
| 1901 | 103.996 | 31.399 | 4.9 | 103.969 | 31.372 | 4.9 | 103.951 | 31.389 | 6.5 | 103.979 | 31.416 | 6.5 | 0.12 | 0.00 | 0.12 | 0.09 | 0.04 | 0.10 |
| 1902 | 103.969 | 31.372 | 4.9 | 103.940 | 31.345 | 4.9 | 103.923 | 31.362 | 6.5 | 103.951 | 31.389 | 6.5 | 0.00 | 0.00 | 0.00 | 0.03 | 0.00 | 0.03 |
| 1903 | 103.940 | 31.345 | 4.9 | 103.912 | 31.319 | 4.9 | 103.895 | 31.335 | 6.5 | 103.923 | 31.362 | 6.5 | 0.00 | 0.00 | 0.00 | 0.00 | 0.01 | 0.01 |
| 1904 | 103.912 | 31.319 | 4.9 | 103.884 | 31.292 | 4.9 | 103.867 | 31.309 | 6.5 | 103.895 | 31.335 | 6.5 | 0.00 | 0.28 | 0.28 | 0.00 | 0.07 | 0.07 |
| 1905 | 103.884 | 31.292 | 4.9 | 103.856 | 31.265 | 4.9 | 103.839 | 31.282 | 6.5 | 103.867 | 31.309 | 6.5 | 0.00 | 1.32 | 1.32 | 0.00 | 0.09 | 0.09 |
| 1906 | 103.856 | 31.265 | 4.9 | 103.828 | 31.239 | 4.9 | 103.811 | 31.255 | 6.5 | 103.839 | 31.282 | 6.5 | 0.00 | 2.45 | 2.45 | 0.00 | 0.10 | 0.10 |
| 1907 | 103.828 | 31.239 | 4.9 | 103.800 | 31.212 | 4.9 | 103.782 | 31.229 | 6.5 | 103.811 | 31.255 | 6.5 | 0.00 | 2.48 | 2.48 | 0.04 | 0.08 | 0.09 |
| 1908 | 103.800 | 31.212 | 4.9 | 103.772 | 31.185 | 4.9 | 103.754 | 31.202 | 6.5 | 103.782 | 31.229 | 6.5 | 0.83 | 0.00 | 0.83 | 0.10 | 0.00 | 0.10 |
| 1909 | 103.772 | 31.185 | 4.9 | 103.744 | 31.159 | 4.9 | 103.726 | 31.175 | 6.5 | 103.754 | 31.202 | 6.5 | 1.54 | 0.00 | 1.54 | 0.13 | 0.00 | 0.13 |
| 1910 | 103.744 | 31.159 | 4.9 | 103.716 | 31.132 | 4.9 | 103.698 | 31.149 | 6.5 | 103.726 | 31.175 | 6.5 | 2.44 | 0.50 | 2.50 | 0.12 | 0.01 | 0.12 |
| 1911 | 103.716 | 31.132 | 4.9 | 103.688 | 31.105 | 4.9 | 103.670 | 31.122 | 6.5 | 103.698 | 31.149 | 6.5 | 1.30 | 1.39 | 1.90 | 0.00 | 0.09 | 0.09 |
| 1912 | 103.688 | 31.105 | 4.9 | 103.660 | 31.079 | 4.9 | 103.642 | 31.095 | 6.5 | 103.670 | 31.122 | 6.5 | 0.00 | 0.00 | 0.00 | 0.00 | 0.00 | 0.00 |
| 1913 | 103.660 | 31.079 | 4.9 | 103.632 | 31.052 | 4.9 | 103.614 | 31.069 | 6.5 | 103.642 | 31.095 | 6.5 | 0.00 | 0.65 | 0.65 | 0.00 | 0.09 | 0.09 |
| 1914 | 103.632 | 31.052 | 4.9 | 103.604 | 31.025 | 4.9 | 103.586 | 31.042 | 6.5 | 103.614 | 31.069 | 6.5 | 0.00 | 0.59 | 0.59 | 0.00 | 0.12 | 0.12 |
| 1915 | 103.604 | 31.025 | 4.9 | 103.576 | 30.998 | 4.9 | 103.558 | 31.015 | 6.5 | 103.586 | 31.042 | 6.5 | 0.05 | 0.59 | 0.59 | 0.00 | 0.01 | 0.01 |
| 1916 | 103.576 | 30.998 | 4.9 | 103.548 | 30.972 | 4.9 | 103.530 | 30.988 | 6.5 | 103.558 | 31.015 | 6.5 | 0.10 | 1.22 | 1.23 | 0.00 | 0.12 | 0.12 |

|      |         |        |     |         |        |     |         |        |     |         |        |     |      |      |      |      |      |      |
|------|---------|--------|-----|---------|--------|-----|---------|--------|-----|---------|--------|-----|------|------|------|------|------|------|
| 1917 | 103.548 | 30.972 | 4.9 | 103.520 | 30.945 | 4.9 | 103.502 | 30.962 | 6.5 | 103.530 | 30.988 | 6.5 | 0.00 | 0.85 | 0.85 | 0.00 | 0.12 | 0.12 |
| 1918 | 103.520 | 30.945 | 4.9 | 103.492 | 30.919 | 4.9 | 103.474 | 30.935 | 6.5 | 103.502 | 30.962 | 6.5 | 0.00 | 0.96 | 0.96 | 0.00 | 0.12 | 0.12 |
| 1919 | 103.492 | 30.919 | 4.9 | 103.464 | 30.892 | 4.9 | 103.446 | 30.909 | 6.5 | 103.474 | 30.935 | 6.5 | 0.00 | 0.26 | 0.26 | 0.00 | 0.08 | 0.08 |
| 1920 | 103.464 | 30.892 | 4.9 | 103.436 | 30.865 | 4.9 | 103.418 | 30.882 | 6.5 | 103.446 | 30.909 | 6.5 | 0.00 | 0.10 | 0.10 | 0.00 | 0.08 | 0.08 |
| 1921 | 103.436 | 30.865 | 4.9 | 103.408 | 30.838 | 4.9 | 103.390 | 30.855 | 6.5 | 103.418 | 30.882 | 6.5 | 0.00 | 0.00 | 0.00 | 0.00 | 0.06 | 0.06 |
| 1922 | 103.408 | 30.838 | 4.9 | 103.380 | 30.812 | 4.9 | 103.362 | 30.828 | 6.5 | 103.390 | 30.855 | 6.5 | 0.00 | 0.00 | 0.00 | 0.00 | 0.00 | 0.00 |
| 1923 | 103.380 | 30.812 | 4.9 | 103.352 | 30.785 | 4.9 | 103.334 | 30.802 | 6.5 | 103.362 | 30.828 | 6.5 | 0.00 | 0.00 | 0.00 | 0.00 | 0.00 | 0.00 |
| 1924 | 103.352 | 30.785 | 4.9 | 103.324 | 30.758 | 4.9 | 103.306 | 30.775 | 6.5 | 103.334 | 30.802 | 6.5 | 0.00 | 0.00 | 0.00 | 0.00 | 0.00 | 0.00 |
| 1925 | 103.324 | 30.758 | 4.9 | 103.296 | 30.732 | 4.9 | 103.278 | 30.748 | 6.5 | 103.306 | 30.775 | 6.5 | 0.00 | 0.00 | 0.00 | 0.00 | 0.03 | 0.03 |
| 1926 | 103.296 | 30.732 | 4.9 | 103.268 | 30.705 | 4.9 | 103.250 | 30.722 | 6.5 | 103.278 | 30.748 | 6.5 | 0.00 | 0.36 | 0.36 | 0.00 | 0.09 | 0.09 |
| 1927 | 104.509 | 31.921 | 6.5 | 104.481 | 31.894 | 6.5 | 104.464 | 31.911 | 8.2 | 104.492 | 31.938 | 8.2 | 0.00 | 0.00 | 0.00 | 0.00 | 0.00 | 0.00 |
| 1928 | 104.481 | 31.894 | 6.5 | 104.453 | 31.867 | 6.5 | 104.436 | 31.884 | 8.2 | 104.464 | 31.911 | 8.2 | 0.00 | 0.00 | 0.00 | 0.00 | 0.00 | 0.00 |
| 1929 | 104.453 | 31.867 | 6.5 | 104.425 | 31.841 | 6.5 | 104.408 | 31.858 | 8.2 | 104.436 | 31.884 | 8.2 | 0.00 | 0.00 | 0.00 | 0.00 | 0.00 | 0.00 |
| 1930 | 104.425 | 31.841 | 6.5 | 104.397 | 31.814 | 6.5 | 104.379 | 31.831 | 8.2 | 104.408 | 31.858 | 8.2 | 0.00 | 0.00 | 0.00 | 0.00 | 0.00 | 0.00 |
| 1931 | 104.397 | 31.814 | 6.5 | 104.369 | 31.788 | 6.5 | 104.352 | 31.804 | 8.2 | 104.379 | 31.831 | 8.2 | 0.00 | 0.00 | 0.00 | 0.00 | 0.00 | 0.00 |
| 1932 | 104.369 | 31.788 | 6.5 | 104.341 | 31.761 | 6.5 | 104.323 | 31.778 | 8.2 | 104.352 | 31.804 | 8.2 | 0.00 | 0.00 | 0.00 | 0.00 | 0.00 | 0.00 |
| 1933 | 104.341 | 31.761 | 6.5 | 104.313 | 31.734 | 6.5 | 104.295 | 31.751 | 8.2 | 104.323 | 31.778 | 8.2 | 0.00 | 0.00 | 0.00 | 0.00 | 0.00 | 0.00 |
| 1934 | 104.313 | 31.734 | 6.5 | 104.285 | 31.707 | 6.5 | 104.267 | 31.724 | 8.2 | 104.295 | 31.751 | 8.2 | 0.00 | 0.00 | 0.00 | 0.00 | 0.00 | 0.00 |
| 1935 | 104.285 | 31.707 | 6.5 | 104.257 | 31.681 | 6.5 | 104.239 | 31.698 | 8.2 | 104.267 | 31.724 | 8.2 | 0.00 | 0.00 | 0.00 | 0.00 | 0.00 | 0.00 |
| 1936 | 104.257 | 31.681 | 6.5 | 104.229 | 31.654 | 6.5 | 104.211 | 31.671 | 8.2 | 104.239 | 31.698 | 8.2 | 0.00 | 0.00 | 0.00 | 0.00 | 0.00 | 0.00 |
| 1937 | 104.229 | 31.654 | 6.5 | 104.201 | 31.627 | 6.5 | 104.183 | 31.644 | 8.2 | 104.211 | 31.671 | 8.2 | 0.00 | 0.00 | 0.00 | 0.00 | 0.00 | 0.00 |
| 1938 | 104.201 | 31.627 | 6.5 | 104.173 | 31.601 | 6.5 | 104.155 | 31.617 | 8.2 | 104.183 | 31.644 | 8.2 | 0.00 | 0.00 | 0.00 | 0.00 | 0.00 | 0.00 |
| 1939 | 104.173 | 31.601 | 6.5 | 104.145 | 31.574 | 6.5 | 104.127 | 31.591 | 8.2 | 104.155 | 31.617 | 8.2 | 0.00 | 0.00 | 0.00 | 0.00 | 0.00 | 0.00 |
| 1940 | 104.145 | 31.574 | 6.5 | 104.117 | 31.547 | 6.5 | 104.099 | 31.564 | 8.2 | 104.127 | 31.591 | 8.2 | 0.00 | 0.00 | 0.00 | 0.00 | 0.00 | 0.00 |
| 1941 | 104.117 | 31.547 | 6.5 | 104.089 | 31.521 | 6.5 | 104.071 | 31.537 | 8.2 | 104.099 | 31.564 | 8.2 | 0.00 | 0.00 | 0.00 | 0.00 | 0.00 | 0.00 |
| 1942 | 104.089 | 31.521 | 6.5 | 104.061 | 31.494 | 6.5 | 104.043 | 31.511 | 8.2 | 104.071 | 31.537 | 8.2 | 0.00 | 0.00 | 0.00 | 0.00 | 0.00 | 0.00 |
| 1943 | 104.061 | 31.494 | 6.5 | 104.033 | 31.467 | 6.5 | 104.015 | 31.484 | 8.2 | 104.043 | 31.511 | 8.2 | 0.00 | 0.00 | 0.00 | 0.00 | 0.00 | 0.00 |
| 1944 | 104.033 | 31.467 | 6.5 | 104.005 | 31.441 | 6.5 | 103.987 | 31.457 | 8.2 | 104.015 | 31.484 | 8.2 | 0.00 | 0.00 | 0.00 | 0.00 | 0.00 | 0.00 |
| 1945 | 104.005 | 31.441 | 6.5 | 103.977 | 31.414 | 6.5 | 103.959 | 31.431 | 8.2 | 103.987 | 31.457 | 8.2 | 0.00 | 0.00 | 0.00 | 0.00 | 0.00 | 0.00 |
| 1946 | 103.977 | 31.414 | 6.5 | 103.949 | 31.387 | 6.5 | 103.931 | 31.404 | 8.2 | 103.959 | 31.431 | 8.2 | 0.00 | 0.00 | 0.00 | 0.00 | 0.00 | 0.00 |
| 1947 | 103.949 | 31.387 | 6.5 | 103.921 | 31.360 | 6.5 | 103.903 | 31.377 | 8.2 | 103.931 | 31.404 | 8.2 | 0.00 | 0.00 | 0.00 | 0.00 | 0.00 | 0.00 |
| 1948 | 103.921 | 31.360 | 6.5 | 103.893 | 31.334 | 6.5 | 103.875 | 31.351 | 8.2 | 103.903 | 31.377 | 8.2 | 0.00 | 0.00 | 0.00 | 0.00 | 0.00 | 0.00 |
| 1949 | 103.893 | 31.334 | 6.5 | 103.865 | 31.307 | 6.5 | 103.847 | 31.324 | 8.2 | 103.875 | 31.351 | 8.2 | 0.00 | 0.00 | 0.00 | 0.00 | 0.00 | 0.00 |
| 1950 | 103.865 | 31.307 | 6.5 | 103.837 | 31.280 | 6.5 | 103.819 | 31.297 | 8.2 | 103.847 | 31.324 | 8.2 | 0.00 | 0.30 | 0.30 | 0.00 | 0.06 | 0.06 |
| 1951 | 103.837 | 31.280 | 6.5 | 103.809 | 31.254 | 6.5 | 103.791 | 31.270 | 8.2 | 103.819 | 31.297 | 8.2 | 0.00 | 0.87 | 0.87 | 0.00 | 0.09 | 0.09 |
| 1952 | 103.809 | 31.254 | 6.5 | 103.781 | 31.227 | 6.5 | 103.763 | 31.244 | 8.2 | 103.791 | 31.270 | 8.2 | 0.00 | 0.87 | 0.87 | 0.00 | 0.07 | 0.07 |
| 1953 | 103.781 | 31.227 | 6.5 | 103.753 | 31.200 | 6.5 | 103.735 | 31.217 | 8.2 | 103.763 | 31.244 | 8.2 | 0.00 | 0.00 | 0.00 | 0.12 | 0.00 | 0.12 |
| 1954 | 103.753 | 31.200 | 6.5 | 103.725 | 31.174 | 6.5 | 103.707 | 31.191 | 8.2 | 103.735 | 31.217 | 8.2 | 0.51 | 0.00 | 0.51 | 0.17 | 0.00 | 0.17 |
| 1955 | 103.725 | 31.174 | 6.5 | 103.697 | 31.147 | 6.5 | 103.679 | 31.164 | 8.2 | 103.707 | 31.191 | 8.2 | 0.17 | 0.00 | 0.17 | 0.17 | 0.00 | 0.17 |

|      |         |        |     |         |        |     |         |        |     |         |        |     |      |      |      |      |      |      |
|------|---------|--------|-----|---------|--------|-----|---------|--------|-----|---------|--------|-----|------|------|------|------|------|------|
| 1956 | 103.697 | 31.147 | 6.5 | 103.668 | 31.120 | 6.5 | 103.651 | 31.137 | 8.2 | 103.679 | 31.164 | 8.2 | 0.00 | 0.00 | 0.00 | 0.09 | 0.00 | 0.09 |
| 1957 | 103.668 | 31.120 | 6.5 | 103.641 | 31.094 | 6.5 | 103.623 | 31.110 | 8.2 | 103.651 | 31.137 | 8.2 | 0.00 | 0.00 | 0.00 | 0.00 | 0.00 | 0.00 |
| 1958 | 103.641 | 31.094 | 6.5 | 103.612 | 31.067 | 6.5 | 103.595 | 31.084 | 8.2 | 103.623 | 31.110 | 8.2 | 0.00 | 0.00 | 0.00 | 0.00 | 0.00 | 0.00 |
| 1959 | 103.612 | 31.067 | 6.5 | 103.585 | 31.040 | 6.5 | 103.567 | 31.057 | 8.2 | 103.595 | 31.084 | 8.2 | 0.00 | 0.00 | 0.00 | 0.00 | 0.00 | 0.00 |
| 1960 | 103.585 | 31.040 | 6.5 | 103.556 | 31.014 | 6.5 | 103.539 | 31.030 | 8.2 | 103.567 | 31.057 | 8.2 | 0.00 | 0.00 | 0.00 | 0.00 | 0.00 | 0.00 |
| 1961 | 103.556 | 31.014 | 6.5 | 103.528 | 30.987 | 6.5 | 103.511 | 31.004 | 8.2 | 103.539 | 31.030 | 8.2 | 0.00 | 0.06 | 0.06 | 0.00 | 0.00 | 0.00 |
| 1962 | 103.528 | 30.987 | 6.5 | 103.500 | 30.960 | 6.5 | 103.483 | 30.977 | 8.2 | 103.511 | 31.004 | 8.2 | 0.00 | 0.19 | 0.19 | 0.00 | 0.00 | 0.00 |
| 1963 | 103.500 | 30.960 | 6.5 | 103.472 | 30.934 | 6.5 | 103.455 | 30.950 | 8.2 | 103.483 | 30.977 | 8.2 | 0.00 | 0.00 | 0.00 | 0.00 | 0.00 | 0.00 |
| 1964 | 103.472 | 30.934 | 6.5 | 103.444 | 30.907 | 6.5 | 103.427 | 30.924 | 8.2 | 103.455 | 30.950 | 8.2 | 0.00 | 0.00 | 0.00 | 0.00 | 0.00 | 0.00 |
| 1965 | 103.444 | 30.907 | 6.5 | 103.416 | 30.880 | 6.5 | 103.398 | 30.897 | 8.2 | 103.427 | 30.924 | 8.2 | 0.00 | 0.00 | 0.00 | 0.00 | 0.00 | 0.00 |
| 1966 | 103.416 | 30.880 | 6.5 | 103.388 | 30.854 | 6.5 | 103.371 | 30.870 | 8.2 | 103.398 | 30.897 | 8.2 | 0.00 | 0.00 | 0.00 | 0.00 | 0.00 | 0.00 |
| 1967 | 103.388 | 30.854 | 6.5 | 103.360 | 30.827 | 6.5 | 103.343 | 30.843 | 8.2 | 103.371 | 30.870 | 8.2 | 0.00 | 0.00 | 0.00 | 0.00 | 0.00 | 0.00 |
| 1968 | 103.360 | 30.827 | 6.5 | 103.332 | 30.800 | 6.5 | 103.314 | 30.817 | 8.2 | 103.343 | 30.843 | 8.2 | 0.00 | 0.00 | 0.00 | 0.00 | 0.02 | 0.02 |
| 1969 | 103.332 | 30.800 | 6.5 | 103.304 | 30.773 | 6.5 | 103.286 | 30.790 | 8.2 | 103.314 | 30.817 | 8.2 | 0.00 | 0.12 | 0.12 | 0.00 | 0.14 | 0.14 |
| 1970 | 103.304 | 30.773 | 6.5 | 103.276 | 30.747 | 6.5 | 103.258 | 30.763 | 8.2 | 103.286 | 30.790 | 8.2 | 0.00 | 0.37 | 0.37 | 0.00 | 0.18 | 0.18 |
| 1971 | 103.276 | 30.747 | 6.5 | 103.248 | 30.720 | 6.5 | 103.230 | 30.737 | 8.2 | 103.258 | 30.763 | 8.2 | 0.00 | 0.45 | 0.45 | 0.00 | 0.12 | 0.12 |
| 1972 | 104.490 | 31.936 | 8.2 | 104.462 | 31.910 | 8.2 | 104.444 | 31.926 | 9.8 | 104.472 | 31.953 | 9.8 | 0.00 | 0.00 | 0.00 | 0.00 | 0.00 | 0.00 |
| 1973 | 104.462 | 31.910 | 8.2 | 104.434 | 31.883 | 8.2 | 104.416 | 31.900 | 9.8 | 104.444 | 31.926 | 9.8 | 0.00 | 0.00 | 0.00 | 0.00 | 0.00 | 0.00 |
| 1974 | 104.434 | 31.883 | 8.2 | 104.406 | 31.856 | 8.2 | 104.388 | 31.873 | 9.8 | 104.416 | 31.900 | 9.8 | 0.00 | 0.00 | 0.00 | 0.00 | 0.00 | 0.00 |
| 1975 | 104.406 | 31.856 | 8.2 | 104.378 | 31.829 | 8.2 | 104.360 | 31.846 | 9.8 | 104.388 | 31.873 | 9.8 | 0.00 | 0.00 | 0.00 | 0.00 | 0.00 | 0.00 |
| 1976 | 104.378 | 31.829 | 8.2 | 104.350 | 31.803 | 8.2 | 104.332 | 31.820 | 9.8 | 104.360 | 31.846 | 9.8 | 0.00 | 0.00 | 0.00 | 0.00 | 0.00 | 0.00 |
| 1977 | 104.350 | 31.803 | 8.2 | 104.322 | 31.776 | 8.2 | 104.304 | 31.793 | 9.8 | 104.332 | 31.820 | 9.8 | 0.00 | 0.00 | 0.00 | 0.00 | 0.00 | 0.00 |
| 1978 | 104.322 | 31.776 | 8.2 | 104.294 | 31.749 | 8.2 | 104.276 | 31.766 | 9.8 | 104.304 | 31.793 | 9.8 | 0.00 | 0.00 | 0.00 | 0.00 | 0.00 | 0.00 |
| 1979 | 104.294 | 31.749 | 8.2 | 104.266 | 31.723 | 8.2 | 104.248 | 31.739 | 9.8 | 104.276 | 31.766 | 9.8 | 0.00 | 0.00 | 0.00 | 0.00 | 0.00 | 0.00 |
| 1980 | 104.266 | 31.723 | 8.2 | 104.237 | 31.696 | 8.2 | 104.220 | 31.713 | 9.8 | 104.248 | 31.739 | 9.8 | 0.00 | 0.00 | 0.00 | 0.00 | 0.00 | 0.00 |
| 1981 | 104.237 | 31.696 | 8.2 | 104.210 | 31.669 | 8.2 | 104.192 | 31.686 | 9.8 | 104.220 | 31.713 | 9.8 | 0.00 | 0.00 | 0.00 | 0.00 | 0.00 | 0.00 |
| 1982 | 104.210 | 31.669 | 8.2 | 104.181 | 31.643 | 8.2 | 104.164 | 31.659 | 9.8 | 104.192 | 31.686 | 9.8 | 0.00 | 0.00 | 0.00 | 0.00 | 0.00 | 0.00 |
| 1983 | 104.181 | 31.643 | 8.2 | 104.153 | 31.616 | 8.2 | 104.136 | 31.633 | 9.8 | 104.164 | 31.659 | 9.8 | 0.00 | 0.00 | 0.00 | 0.00 | 0.00 | 0.00 |
| 1984 | 104.153 | 31.616 | 8.2 | 104.125 | 31.589 | 8.2 | 104.108 | 31.606 | 9.8 | 104.136 | 31.633 | 9.8 | 0.00 | 0.00 | 0.00 | 0.00 | 0.00 | 0.00 |
| 1985 | 104.125 | 31.589 | 8.2 | 104.097 | 31.562 | 8.2 | 104.080 | 31.579 | 9.8 | 104.108 | 31.606 | 9.8 | 0.00 | 0.00 | 0.00 | 0.00 | 0.00 | 0.00 |
| 1986 | 104.097 | 31.562 | 8.2 | 104.069 | 31.536 | 8.2 | 104.052 | 31.553 | 9.8 | 104.080 | 31.579 | 9.8 | 0.00 | 0.00 | 0.00 | 0.00 | 0.00 | 0.00 |
| 1987 | 104.069 | 31.536 | 8.2 | 104.041 | 31.509 | 8.2 | 104.023 | 31.526 | 9.8 | 104.052 | 31.553 | 9.8 | 0.00 | 0.00 | 0.00 | 0.00 | 0.00 | 0.00 |
| 1988 | 104.041 | 31.509 | 8.2 | 104.013 | 31.482 | 8.2 | 103.996 | 31.499 | 9.8 | 104.023 | 31.526 | 9.8 | 0.00 | 0.00 | 0.00 | 0.00 | 0.00 | 0.00 |
| 1989 | 104.013 | 31.482 | 8.2 | 103.985 | 31.456 | 8.2 | 103.968 | 31.473 | 9.8 | 103.996 | 31.499 | 9.8 | 0.00 | 0.00 | 0.00 | 0.00 | 0.00 | 0.00 |
| 1990 | 103.985 | 31.456 | 8.2 | 103.957 | 31.429 | 8.2 | 103.939 | 31.446 | 9.8 | 103.968 | 31.473 | 9.8 | 0.00 | 0.00 | 0.00 | 0.00 | 0.00 | 0.00 |
| 1991 | 103.957 | 31.429 | 8.2 | 103.929 | 31.402 | 8.2 | 103.911 | 31.419 | 9.8 | 103.939 | 31.446 | 9.8 | 0.00 | 0.00 | 0.00 | 0.00 | 0.00 | 0.00 |
| 1992 | 103.929 | 31.402 | 8.2 | 103.901 | 31.376 | 8.2 | 103.883 | 31.392 | 9.8 | 103.911 | 31.419 | 9.8 | 0.00 | 0.00 | 0.00 | 0.00 | 0.00 | 0.00 |
| 1993 | 103.901 | 31.376 | 8.2 | 103.873 | 31.349 | 8.2 | 103.855 | 31.366 | 9.8 | 103.883 | 31.392 | 9.8 | 0.00 | 0.00 | 0.00 | 0.00 | 0.00 | 0.00 |
| 1994 | 103.873 | 31.349 | 8.2 | 103.845 | 31.322 | 8.2 | 103.827 | 31.339 | 9.8 | 103.855 | 31.366 | 9.8 | 0.00 | 0.00 | 0.00 | 0.00 | 0.00 | 0.00 |

|      |         |        |     |         |        |     |         |        |      |         |        |      |      |      |      |      |      |      |
|------|---------|--------|-----|---------|--------|-----|---------|--------|------|---------|--------|------|------|------|------|------|------|------|
| 1995 | 103.845 | 31.322 | 8.2 | 103.817 | 31.296 | 8.2 | 103.799 | 31.312 | 9.8  | 103.827 | 31.339 | 9.8  | 0.00 | 0.00 | 0.00 | 0.00 | 0.00 | 0.00 |
| 1996 | 103.817 | 31.296 | 8.2 | 103.789 | 31.269 | 8.2 | 103.771 | 31.286 | 9.8  | 103.799 | 31.312 | 9.8  | 0.00 | 0.00 | 0.00 | 0.00 | 0.01 | 0.01 |
| 1997 | 103.789 | 31.269 | 8.2 | 103.761 | 31.242 | 8.2 | 103.743 | 31.259 | 9.8  | 103.771 | 31.286 | 9.8  | 0.00 | 0.00 | 0.00 | 0.00 | 0.01 | 0.01 |
| 1998 | 103.761 | 31.242 | 8.2 | 103.733 | 31.216 | 8.2 | 103.715 | 31.232 | 9.8  | 103.743 | 31.259 | 9.8  | 0.00 | 0.00 | 0.00 | 0.09 | 0.00 | 0.09 |
| 1999 | 103.733 | 31.216 | 8.2 | 103.705 | 31.189 | 8.2 | 103.687 | 31.206 | 9.8  | 103.715 | 31.232 | 9.8  | 0.16 | 0.00 | 0.16 | 0.12 | 0.00 | 0.12 |
| 2000 | 103.705 | 31.189 | 8.2 | 103.677 | 31.162 | 8.2 | 103.659 | 31.179 | 9.8  | 103.687 | 31.206 | 9.8  | 0.44 | 0.00 | 0.44 | 0.11 | 0.00 | 0.11 |
| 2001 | 103.677 | 31.162 | 8.2 | 103.649 | 31.136 | 8.2 | 103.631 | 31.152 | 9.8  | 103.659 | 31.179 | 9.8  | 0.00 | 0.00 | 0.00 | 0.05 | 0.00 | 0.05 |
| 2002 | 103.649 | 31.136 | 8.2 | 103.621 | 31.109 | 8.2 | 103.603 | 31.125 | 9.8  | 103.631 | 31.152 | 9.8  | 0.00 | 0.00 | 0.00 | 0.00 | 0.00 | 0.00 |
| 2003 | 103.621 | 31.109 | 8.2 | 103.593 | 31.082 | 8.2 | 103.575 | 31.099 | 9.8  | 103.603 | 31.125 | 9.8  | 0.00 | 0.00 | 0.00 | 0.00 | 0.00 | 0.00 |
| 2004 | 103.593 | 31.082 | 8.2 | 103.565 | 31.055 | 8.2 | 103.547 | 31.072 | 9.8  | 103.575 | 31.099 | 9.8  | 0.00 | 0.00 | 0.00 | 0.00 | 0.00 | 0.00 |
| 2005 | 103.565 | 31.055 | 8.2 | 103.537 | 31.029 | 8.2 | 103.519 | 31.045 | 9.8  | 103.547 | 31.072 | 9.8  | 0.00 | 0.00 | 0.00 | 0.00 | 0.00 | 0.00 |
| 2006 | 103.537 | 31.029 | 8.2 | 103.509 | 31.002 | 8.2 | 103.491 | 31.019 | 9.8  | 103.519 | 31.045 | 9.8  | 0.00 | 0.00 | 0.00 | 0.00 | 0.00 | 0.00 |
| 2007 | 103.509 | 31.002 | 8.2 | 103.481 | 30.975 | 8.2 | 103.463 | 30.992 | 9.8  | 103.491 | 31.019 | 9.8  | 0.00 | 0.00 | 0.00 | 0.00 | 0.00 | 0.00 |
| 2008 | 103.481 | 30.975 | 8.2 | 103.453 | 30.949 | 8.2 | 103.435 | 30.965 | 9.8  | 103.463 | 30.992 | 9.8  | 0.00 | 0.00 | 0.00 | 0.00 | 0.00 | 0.00 |
| 2009 | 103.453 | 30.949 | 8.2 | 103.425 | 30.922 | 8.2 | 103.407 | 30.939 | 9.8  | 103.435 | 30.965 | 9.8  | 0.00 | 0.00 | 0.00 | 0.00 | 0.00 | 0.00 |
| 2010 | 103.425 | 30.922 | 8.2 | 103.397 | 30.895 | 8.2 | 103.379 | 30.912 | 9.8  | 103.407 | 30.939 | 9.8  | 0.00 | 0.00 | 0.00 | 0.00 | 0.00 | 0.00 |
| 2011 | 103.397 | 30.895 | 8.2 | 103.369 | 30.869 | 8.2 | 103.351 | 30.885 | 9.8  | 103.379 | 30.912 | 9.8  | 0.00 | 0.00 | 0.00 | 0.00 | 0.00 | 0.00 |
| 2012 | 103.369 | 30.869 | 8.2 | 103.341 | 30.842 | 8.2 | 103.323 | 30.859 | 9.8  | 103.351 | 30.885 | 9.8  | 0.00 | 0.00 | 0.00 | 0.00 | 0.01 | 0.01 |
| 2013 | 103.341 | 30.842 | 8.2 | 103.313 | 30.815 | 8.2 | 103.295 | 30.832 | 9.8  | 103.323 | 30.859 | 9.8  | 0.00 | 0.19 | 0.19 | 0.00 | 0.15 | 0.15 |
| 2014 | 103.313 | 30.815 | 8.2 | 103.285 | 30.788 | 8.2 | 103.267 | 30.805 | 9.8  | 103.295 | 30.832 | 9.8  | 0.00 | 0.65 | 0.65 | 0.00 | 0.29 | 0.29 |
| 2015 | 103.285 | 30.788 | 8.2 | 103.257 | 30.762 | 8.2 | 103.239 | 30.779 | 9.8  | 103.267 | 30.805 | 9.8  | 0.00 | 0.86 | 0.86 | 0.00 | 0.28 | 0.28 |
| 2016 | 103.257 | 30.762 | 8.2 | 103.228 | 30.735 | 8.2 | 103.211 | 30.752 | 9.8  | 103.239 | 30.779 | 9.8  | 0.00 | 0.51 | 0.51 | 0.00 | 0.15 | 0.15 |
| 2017 | 104.470 | 31.951 | 9.8 | 104.442 | 31.925 | 9.8 | 104.424 | 31.942 | 11.4 | 104.452 | 31.968 | 11.4 | 0.00 | 0.00 | 0.00 | 0.00 | 0.00 | 0.00 |
| 2018 | 104.442 | 31.925 | 9.8 | 104.414 | 31.898 | 9.8 | 104.396 | 31.915 | 11.4 | 104.424 | 31.942 | 11.4 | 0.00 | 0.00 | 0.00 | 0.00 | 0.00 | 0.00 |
| 2019 | 104.414 | 31.898 | 9.8 | 104.386 | 31.871 | 9.8 | 104.368 | 31.888 | 11.4 | 104.396 | 31.915 | 11.4 | 0.00 | 0.00 | 0.00 | 0.00 | 0.00 | 0.00 |
| 2020 | 104.386 | 31.871 | 9.8 | 104.358 | 31.845 | 9.8 | 104.340 | 31.861 | 11.4 | 104.368 | 31.888 | 11.4 | 0.00 | 0.00 | 0.00 | 0.00 | 0.00 | 0.00 |
| 2021 | 104.358 | 31.845 | 9.8 | 104.330 | 31.818 | 9.8 | 104.312 | 31.835 | 11.4 | 104.340 | 31.861 | 11.4 | 0.00 | 0.00 | 0.00 | 0.00 | 0.00 | 0.00 |
| 2022 | 104.330 | 31.818 | 9.8 | 104.302 | 31.791 | 9.8 | 104.284 | 31.808 | 11.4 | 104.312 | 31.835 | 11.4 | 0.00 | 0.00 | 0.00 | 0.00 | 0.00 | 0.00 |
| 2023 | 104.302 | 31.791 | 9.8 | 104.274 | 31.765 | 9.8 | 104.256 | 31.781 | 11.4 | 104.284 | 31.808 | 11.4 | 0.00 | 0.00 | 0.00 | 0.00 | 0.00 | 0.00 |
| 2024 | 104.274 | 31.765 | 9.8 | 104.246 | 31.738 | 9.8 | 104.228 | 31.755 | 11.4 | 104.256 | 31.781 | 11.4 | 0.00 | 0.00 | 0.00 | 0.00 | 0.00 | 0.00 |
| 2025 | 104.246 | 31.738 | 9.8 | 104.218 | 31.711 | 9.8 | 104.200 | 31.728 | 11.4 | 104.228 | 31.755 | 11.4 | 0.00 | 0.00 | 0.00 | 0.00 | 0.00 | 0.00 |
| 2026 | 104.218 | 31.711 | 9.8 | 104.190 | 31.684 | 9.8 | 104.172 | 31.701 | 11.4 | 104.200 | 31.728 | 11.4 | 0.00 | 0.00 | 0.00 | 0.00 | 0.00 | 0.00 |
| 2027 | 104.190 | 31.684 | 9.8 | 104.162 | 31.658 | 9.8 | 104.144 | 31.675 | 11.4 | 104.172 | 31.701 | 11.4 | 0.00 | 0.00 | 0.00 | 0.00 | 0.00 | 0.00 |
| 2028 | 104.162 | 31.658 | 9.8 | 104.134 | 31.631 | 9.8 | 104.116 | 31.648 | 11.4 | 104.144 | 31.675 | 11.4 | 0.00 | 0.00 | 0.00 | 0.00 | 0.00 | 0.00 |
| 2029 | 104.134 | 31.631 | 9.8 | 104.106 | 31.604 | 9.8 | 104.088 | 31.621 | 11.4 | 104.116 | 31.648 | 11.4 | 0.00 | 0.00 | 0.00 | 0.00 | 0.00 | 0.00 |
| 2030 | 104.106 | 31.604 | 9.8 | 104.078 | 31.578 | 9.8 | 104.060 | 31.595 | 11.4 | 104.088 | 31.621 | 11.4 | 0.00 | 0.00 | 0.00 | 0.00 | 0.00 | 0.00 |
| 2031 | 104.078 | 31.578 | 9.8 | 104.050 | 31.551 | 9.8 | 104.032 | 31.568 | 11.4 | 104.060 | 31.595 | 11.4 | 0.00 | 0.00 | 0.00 | 0.00 | 0.00 | 0.00 |
| 2032 | 104.050 | 31.551 | 9.8 | 104.022 | 31.524 | 9.8 | 104.004 | 31.541 | 11.4 | 104.032 | 31.568 | 11.4 | 0.00 | 0.00 | 0.00 | 0.00 | 0.00 | 0.00 |
| 2033 | 104.022 | 31.524 | 9.8 | 103.994 | 31.498 | 9.8 | 103.976 | 31.514 | 11.4 | 104.004 | 31.541 | 11.4 | 0.00 | 0.00 | 0.00 | 0.00 | 0.00 | 0.00 |

|      |         |        |     |         |        |     |         |        |      |         |        |      |      |      |      |      |      |      |
|------|---------|--------|-----|---------|--------|-----|---------|--------|------|---------|--------|------|------|------|------|------|------|------|
| 2034 | 103.994 | 31.498 | 9.8 | 103.966 | 31.471 | 9.8 | 103.948 | 31.488 | 11.4 | 103.976 | 31.514 | 11.4 | 0.00 | 0.00 | 0.00 | 0.00 | 0.00 | 0.00 |
| 2035 | 103.966 | 31.471 | 9.8 | 103.938 | 31.444 | 9.8 | 103.920 | 31.461 | 11.4 | 103.948 | 31.488 | 11.4 | 0.00 | 0.00 | 0.00 | 0.00 | 0.00 | 0.00 |
| 2036 | 103.938 | 31.444 | 9.8 | 103.909 | 31.418 | 9.8 | 103.892 | 31.434 | 11.4 | 103.920 | 31.461 | 11.4 | 0.00 | 0.00 | 0.00 | 0.00 | 0.00 | 0.00 |
| 2037 | 103.909 | 31.418 | 9.8 | 103.882 | 31.391 | 9.8 | 103.864 | 31.408 | 11.4 | 103.892 | 31.434 | 11.4 | 0.00 | 0.00 | 0.00 | 0.00 | 0.00 | 0.00 |
| 2038 | 103.882 | 31.391 | 9.8 | 103.853 | 31.364 | 9.8 | 103.836 | 31.381 | 11.4 | 103.864 | 31.408 | 11.4 | 0.00 | 0.00 | 0.00 | 0.00 | 0.00 | 0.00 |
| 2039 | 103.853 | 31.364 | 9.8 | 103.826 | 31.337 | 9.8 | 103.808 | 31.354 | 11.4 | 103.836 | 31.381 | 11.4 | 0.00 | 0.00 | 0.00 | 0.00 | 0.00 | 0.00 |
| 2040 | 103.826 | 31.337 | 9.8 | 103.797 | 31.311 | 9.8 | 103.780 | 31.328 | 11.4 | 103.808 | 31.354 | 11.4 | 0.00 | 0.00 | 0.00 | 0.00 | 0.00 | 0.00 |
| 2041 | 103.797 | 31.311 | 9.8 | 103.769 | 31.284 | 9.8 | 103.752 | 31.301 | 11.4 | 103.780 | 31.328 | 11.4 | 0.00 | 0.00 | 0.00 | 0.00 | 0.00 | 0.00 |
| 2042 | 103.769 | 31.284 | 9.8 | 103.741 | 31.257 | 9.8 | 103.724 | 31.274 | 11.4 | 103.752 | 31.301 | 11.4 | 0.00 | 0.00 | 0.00 | 0.00 | 0.00 | 0.00 |
| 2043 | 103.741 | 31.257 | 9.8 | 103.713 | 31.231 | 9.8 | 103.696 | 31.247 | 11.4 | 103.724 | 31.274 | 11.4 | 0.00 | 0.00 | 0.00 | 0.00 | 0.00 | 0.00 |
| 2044 | 103.713 | 31.231 | 9.8 | 103.685 | 31.204 | 9.8 | 103.668 | 31.221 | 11.4 | 103.696 | 31.247 | 11.4 | 0.00 | 0.00 | 0.00 | 0.00 | 0.00 | 0.00 |
| 2045 | 103.685 | 31.204 | 9.8 | 103.657 | 31.177 | 9.8 | 103.639 | 31.194 | 11.4 | 103.668 | 31.221 | 11.4 | 0.00 | 0.00 | 0.00 | 0.00 | 0.00 | 0.00 |
| 2046 | 103.657 | 31.177 | 9.8 | 103.629 | 31.151 | 9.8 | 103.612 | 31.167 | 11.4 | 103.639 | 31.194 | 11.4 | 0.00 | 0.00 | 0.00 | 0.00 | 0.00 | 0.00 |
| 2047 | 103.629 | 31.151 | 9.8 | 103.601 | 31.124 | 9.8 | 103.584 | 31.141 | 11.4 | 103.612 | 31.167 | 11.4 | 0.00 | 0.00 | 0.00 | 0.00 | 0.00 | 0.00 |
| 2048 | 103.601 | 31.124 | 9.8 | 103.573 | 31.097 | 9.8 | 103.555 | 31.114 | 11.4 | 103.584 | 31.141 | 11.4 | 0.00 | 0.00 | 0.00 | 0.00 | 0.00 | 0.00 |
| 2049 | 103.573 | 31.097 | 9.8 | 103.545 | 31.070 | 9.8 | 103.527 | 31.087 | 11.4 | 103.555 | 31.114 | 11.4 | 0.00 | 0.00 | 0.00 | 0.00 | 0.00 | 0.00 |
| 2050 | 103.545 | 31.070 | 9.8 | 103.517 | 31.044 | 9.8 | 103.499 | 31.061 | 11.4 | 103.527 | 31.087 | 11.4 | 0.00 | 0.00 | 0.00 | 0.00 | 0.00 | 0.00 |
| 2051 | 103.517 | 31.044 | 9.8 | 103.489 | 31.017 | 9.8 | 103.471 | 31.034 | 11.4 | 103.499 | 31.061 | 11.4 | 0.00 | 0.00 | 0.00 | 0.00 | 0.00 | 0.00 |
| 2052 | 103.489 | 31.017 | 9.8 | 103.461 | 30.991 | 9.8 | 103.443 | 31.007 | 11.4 | 103.471 | 31.034 | 11.4 | 0.00 | 0.00 | 0.00 | 0.00 | 0.00 | 0.00 |
| 2053 | 103.461 | 30.991 | 9.8 | 103.433 | 30.964 | 9.8 | 103.415 | 30.980 | 11.4 | 103.443 | 31.007 | 11.4 | 0.00 | 0.00 | 0.00 | 0.00 | 0.00 | 0.00 |
| 2054 | 103.433 | 30.964 | 9.8 | 103.405 | 30.937 | 9.8 | 103.387 | 30.954 | 11.4 | 103.415 | 30.980 | 11.4 | 0.00 | 0.00 | 0.00 | 0.00 | 0.00 | 0.00 |
| 2055 | 103.405 | 30.937 | 9.8 | 103.377 | 30.910 | 9.8 | 103.359 | 30.927 | 11.4 | 103.387 | 30.954 | 11.4 | 0.00 | 0.00 | 0.00 | 0.00 | 0.00 | 0.00 |
| 2056 | 103.377 | 30.910 | 9.8 | 103.349 | 30.884 | 9.8 | 103.331 | 30.900 | 11.4 | 103.359 | 30.927 | 11.4 | 0.00 | 0.00 | 0.00 | 0.00 | 0.00 | 0.00 |
| 2057 | 103.349 | 30.884 | 9.8 | 103.321 | 30.857 | 9.8 | 103.303 | 30.874 | 11.4 | 103.331 | 30.900 | 11.4 | 0.00 | 0.00 | 0.00 | 0.00 | 0.01 | 0.01 |
| 2058 | 103.321 | 30.857 | 9.8 | 103.293 | 30.830 | 9.8 | 103.275 | 30.847 | 11.4 | 103.303 | 30.874 | 11.4 | 0.00 | 0.32 | 0.32 | 0.00 | 0.15 | 0.15 |
| 2059 | 103.293 | 30.830 | 9.8 | 103.265 | 30.804 | 9.8 | 103.247 | 30.820 | 11.4 | 103.275 | 30.847 | 11.4 | 0.00 | 0.77 | 0.77 | 0.00 | 0.25 | 0.25 |
| 2060 | 103.265 | 30.804 | 9.8 | 103.237 | 30.777 | 9.8 | 103.219 | 30.794 | 11.4 | 103.247 | 30.820 | 11.4 | 0.00 | 0.83 | 0.83 | 0.00 | 0.23 | 0.23 |
| 2061 | 103.237 | 30.777 | 9.8 | 103.209 | 30.750 | 9.8 | 103.191 | 30.767 | 11.4 | 103.219 | 30.794 | 11.4 | 0.00 | 0.39 | 0.39 | 0.00 | 0.13 | 0.13 |

#

**Model B: (with 128 km<sup>2</sup>/m smoothing weight imposed)**

#

# Beichuan Fault

#

| Sub-Fault | Upper-left corner | Upper-right corner | Lower-right corner | Lower-left corner | Slip | Estimate |
|-----------|-------------------|--------------------|--------------------|-------------------|------|----------|
|-----------|-------------------|--------------------|--------------------|-------------------|------|----------|

| No   | Long.<br>deg | Lat.<br>deg | Depth<br>(km) | Long.<br>deg | Lat.<br>deg | Depth<br>(km) | Long.<br>deg | Lat.<br>deg | Depth<br>(km) | Long.<br>deg | Lat.<br>deg | Depth<br>(km) | Strike<br>(m) | Dip<br>(m) | Amp.<br>(m) |
|------|--------------|-------------|---------------|--------------|-------------|---------------|--------------|-------------|---------------|--------------|-------------|---------------|---------------|------------|-------------|
| 0001 | 105.840      | 32.900      | 0.0           | 105.807      | 32.877      | 0.0           | 105.799      | 32.883      | 2.8           | 105.832      | 32.906      | 2.8           | 0.29          | 0.26       | 0.39        |
| 0002 | 105.807      | 32.877      | 0.0           | 105.774      | 32.855      | 0.0           | 105.766      | 32.860      | 2.8           | 105.799      | 32.883      | 2.8           | 0.12          | 0.45       | 0.47        |
| 0003 | 105.774      | 32.855      | 0.0           | 105.741      | 32.832      | 0.0           | 105.733      | 32.838      | 2.8           | 105.766      | 32.860      | 2.8           | 0.07          | 0.35       | 0.36        |
| 0004 | 105.741      | 32.832      | 0.0           | 105.708      | 32.809      | 0.0           | 105.700      | 32.815      | 2.8           | 105.733      | 32.838      | 2.8           | 0.14          | 0.10       | 0.17        |
| 0005 | 105.708      | 32.809      | 0.0           | 105.675      | 32.786      | 0.0           | 105.666      | 32.792      | 2.8           | 105.700      | 32.815      | 2.8           | 0.08          | 0.00       | 0.08        |
| 0006 | 105.675      | 32.786      | 0.0           | 105.642      | 32.764      | 0.0           | 105.633      | 32.770      | 2.8           | 105.666      | 32.792      | 2.8           | 0.04          | 0.00       | 0.04        |
| 0007 | 105.642      | 32.764      | 0.0           | 105.609      | 32.741      | 0.0           | 105.600      | 32.747      | 2.8           | 105.633      | 32.770      | 2.8           | 0.06          | 0.00       | 0.06        |
| 0008 | 105.609      | 32.741      | 0.0           | 105.576      | 32.718      | 0.0           | 105.567      | 32.724      | 2.8           | 105.600      | 32.747      | 2.8           | 0.03          | 0.00       | 0.03        |
| 0009 | 105.576      | 32.718      | 0.0           | 105.543      | 32.696      | 0.0           | 105.534      | 32.702      | 2.8           | 105.567      | 32.724      | 2.8           | 0.00          | 0.30       | 0.30        |
| 0010 | 105.543      | 32.696      | 0.0           | 105.510      | 32.673      | 0.0           | 105.501      | 32.679      | 2.8           | 105.534      | 32.702      | 2.8           | 0.00          | 0.54       | 0.54        |
| 0011 | 105.510      | 32.673      | 0.0           | 105.477      | 32.651      | 0.0           | 105.469      | 32.656      | 2.8           | 105.501      | 32.679      | 2.8           | 0.00          | 0.49       | 0.49        |
| 0012 | 105.477      | 32.651      | 0.0           | 105.444      | 32.628      | 0.0           | 105.436      | 32.634      | 2.8           | 105.469      | 32.656      | 2.8           | 0.14          | 0.00       | 0.14        |
| 0013 | 105.444      | 32.628      | 0.0           | 105.411      | 32.605      | 0.0           | 105.403      | 32.611      | 2.8           | 105.436      | 32.634      | 2.8           | 0.88          | 0.36       | 0.95        |
| 0014 | 105.411      | 32.605      | 0.0           | 105.378      | 32.583      | 0.0           | 105.370      | 32.588      | 2.8           | 105.403      | 32.611      | 2.8           | 1.04          | 0.72       | 1.26        |
| 0015 | 105.378      | 32.583      | 0.0           | 105.345      | 32.560      | 0.0           | 105.337      | 32.566      | 2.8           | 105.370      | 32.588      | 2.8           | 0.79          | 0.68       | 1.04        |
| 0016 | 105.345      | 32.560      | 0.0           | 105.312      | 32.537      | 0.0           | 105.303      | 32.543      | 2.8           | 105.337      | 32.566      | 2.8           | 0.21          | 0.53       | 0.57        |
| 0017 | 105.312      | 32.537      | 0.0           | 105.279      | 32.514      | 0.0           | 105.270      | 32.520      | 2.8           | 105.303      | 32.543      | 2.8           | 0.00          | 0.78       | 0.78        |
| 0018 | 105.279      | 32.514      | 0.0           | 105.246      | 32.492      | 0.0           | 105.237      | 32.498      | 2.8           | 105.270      | 32.520      | 2.8           | 0.99          | 1.36       | 1.68        |
| 0019 | 105.246      | 32.492      | 0.0           | 105.213      | 32.469      | 0.0           | 105.204      | 32.475      | 2.8           | 105.237      | 32.498      | 2.8           | 2.18          | 1.57       | 2.69        |
| 0020 | 105.213      | 32.469      | 0.0           | 105.180      | 32.447      | 0.0           | 105.171      | 32.452      | 2.8           | 105.204      | 32.475      | 2.8           | 2.66          | 1.76       | 3.19        |
| 0021 | 105.180      | 32.447      | 0.0           | 105.147      | 32.424      | 0.0           | 105.138      | 32.430      | 2.8           | 105.171      | 32.452      | 2.8           | 3.16          | 2.10       | 3.79        |
| 0022 | 105.147      | 32.424      | 0.0           | 105.114      | 32.401      | 0.0           | 105.106      | 32.407      | 2.8           | 105.138      | 32.430      | 2.8           | 3.64          | 2.50       | 4.41        |
| 0023 | 105.114      | 32.401      | 0.0           | 105.081      | 32.379      | 0.0           | 105.073      | 32.384      | 2.8           | 105.106      | 32.407      | 2.8           | 2.97          | 3.16       | 4.34        |
| 0024 | 105.081      | 32.379      | 0.0           | 105.048      | 32.356      | 0.0           | 105.040      | 32.362      | 2.8           | 105.073      | 32.384      | 2.8           | 2.70          | 3.41       | 4.35        |
| 0025 | 105.048      | 32.356      | 0.0           | 105.015      | 32.333      | 0.0           | 105.007      | 32.339      | 2.8           | 105.040      | 32.362      | 2.8           | 4.39          | 1.52       | 4.65        |
| 0026 | 105.015      | 32.333      | 0.0           | 104.982      | 32.310      | 0.0           | 104.974      | 32.316      | 2.8           | 105.007      | 32.339      | 2.8           | 6.44          | 0.19       | 6.44        |
| 0027 | 104.982      | 32.310      | 0.0           | 104.949      | 32.288      | 0.0           | 104.941      | 32.294      | 2.8           | 104.974      | 32.316      | 2.8           | 7.67          | 0.09       | 7.67        |
| 0028 | 104.949      | 32.288      | 0.0           | 104.916      | 32.265      | 0.0           | 104.907      | 32.271      | 2.8           | 104.941      | 32.294      | 2.8           | 7.57          | 1.20       | 7.67        |
| 0029 | 104.916      | 32.265      | 0.0           | 104.883      | 32.242      | 0.0           | 104.874      | 32.248      | 2.8           | 104.907      | 32.271      | 2.8           | 6.39          | 3.15       | 7.13        |
| 0030 | 104.883      | 32.242      | 0.0           | 104.850      | 32.220      | 0.0           | 104.841      | 32.226      | 2.8           | 104.874      | 32.248      | 2.8           | 4.85          | 4.72       | 6.77        |
| 0031 | 104.850      | 32.220      | 0.0           | 104.823      | 32.195      | 0.0           | 104.815      | 32.202      | 2.8           | 104.843      | 32.227      | 2.8           | 3.65          | 4.62       | 5.88        |
| 0032 | 104.823      | 32.195      | 0.0           | 104.796      | 32.170      | 0.0           | 104.788      | 32.177      | 2.8           | 104.815      | 32.202      | 2.8           | 3.41          | 3.93       | 5.20        |
| 0033 | 104.796      | 32.170      | 0.0           | 104.768      | 32.145      | 0.0           | 104.761      | 32.152      | 2.8           | 104.788      | 32.177      | 2.8           | 4.12          | 3.57       | 5.45        |
| 0034 | 104.768      | 32.145      | 0.0           | 104.741      | 32.120      | 0.0           | 104.734      | 32.127      | 2.8           | 104.761      | 32.152      | 2.8           | 4.03          | 3.58       | 5.39        |
| 0035 | 104.741      | 32.120      | 0.0           | 104.714      | 32.095      | 0.0           | 104.706      | 32.102      | 2.8           | 104.734      | 32.127      | 2.8           | 2.63          | 3.72       | 4.56        |
| 0036 | 104.714      | 32.095      | 0.0           | 104.686      | 32.070      | 0.0           | 104.679      | 32.077      | 2.8           | 104.706      | 32.102      | 2.8           | 3.31          | 4.61       | 5.67        |
| 0037 | 104.686      | 32.070      | 0.0           | 104.659      | 32.045      | 0.0           | 104.652      | 32.052      | 2.8           | 104.679      | 32.077      | 2.8           | 4.69          | 5.20       | 7.01        |
| 0038 | 104.659      | 32.045      | 0.0           | 104.632      | 32.020      | 0.0           | 104.625      | 32.027      | 2.8           | 104.652      | 32.052      | 2.8           | 5.52          | 5.75       | 7.97        |
| 0039 | 104.632      | 32.020      | 0.0           | 104.605      | 31.995      | 0.0           | 104.597      | 32.002      | 2.8           | 104.625      | 32.027      | 2.8           | 5.91          | 6.55       | 8.83        |
| 0040 | 104.605      | 31.995      | 0.0           | 104.578      | 31.970      | 0.0           | 104.570      | 31.977      | 2.8           | 104.597      | 32.002      | 2.8           | 5.69          | 6.97       | 9.00        |
| 0041 | 104.578      | 31.970      | 0.0           | 104.550      | 31.945      | 0.0           | 104.543      | 31.952      | 2.8           | 104.570      | 31.977      | 2.8           | 4.58          | 6.37       | 7.84        |

|      |         |        |     |         |        |     |         |        |     |         |        |     |      |      |      |
|------|---------|--------|-----|---------|--------|-----|---------|--------|-----|---------|--------|-----|------|------|------|
| 0042 | 104.550 | 31.945 | 0.0 | 104.523 | 31.920 | 0.0 | 104.516 | 31.927 | 2.8 | 104.543 | 31.952 | 2.8 | 2.77 | 4.08 | 4.93 |
| 0043 | 105.833 | 32.907 | 2.8 | 105.800 | 32.884 | 2.8 | 105.788 | 32.892 | 5.5 | 105.822 | 32.915 | 5.5 | 1.00 | 1.00 | 1.41 |
| 0044 | 105.800 | 32.884 | 2.8 | 105.767 | 32.862 | 2.8 | 105.755 | 32.870 | 5.5 | 105.788 | 32.892 | 5.5 | 0.23 | 0.47 | 0.52 |
| 0045 | 105.767 | 32.862 | 2.8 | 105.734 | 32.839 | 2.8 | 105.722 | 32.847 | 5.5 | 105.755 | 32.870 | 5.5 | 0.00 | 0.22 | 0.22 |
| 0046 | 105.734 | 32.839 | 2.8 | 105.701 | 32.816 | 2.8 | 105.689 | 32.824 | 5.5 | 105.722 | 32.847 | 5.5 | 0.02 | 0.03 | 0.04 |
| 0047 | 105.701 | 32.816 | 2.8 | 105.668 | 32.794 | 2.8 | 105.656 | 32.802 | 5.5 | 105.689 | 32.824 | 5.5 | 0.00 | 0.00 | 0.00 |
| 0048 | 105.668 | 32.794 | 2.8 | 105.635 | 32.771 | 2.8 | 105.624 | 32.779 | 5.5 | 105.656 | 32.802 | 5.5 | 0.00 | 0.00 | 0.00 |
| 0049 | 105.635 | 32.771 | 2.8 | 105.602 | 32.748 | 2.8 | 105.591 | 32.756 | 5.5 | 105.624 | 32.779 | 5.5 | 0.00 | 0.00 | 0.00 |
| 0050 | 105.602 | 32.748 | 2.8 | 105.569 | 32.726 | 2.8 | 105.558 | 32.734 | 5.5 | 105.591 | 32.756 | 5.5 | 0.00 | 0.05 | 0.05 |
| 0051 | 105.569 | 32.726 | 2.8 | 105.536 | 32.703 | 2.8 | 105.525 | 32.711 | 5.5 | 105.558 | 32.734 | 5.5 | 0.04 | 0.26 | 0.27 |
| 0052 | 105.536 | 32.703 | 2.8 | 105.503 | 32.680 | 2.8 | 105.492 | 32.688 | 5.5 | 105.525 | 32.711 | 5.5 | 0.10 | 0.45 | 0.46 |
| 0053 | 105.503 | 32.680 | 2.8 | 105.470 | 32.658 | 2.8 | 105.459 | 32.666 | 5.5 | 105.492 | 32.688 | 5.5 | 0.22 | 0.43 | 0.48 |
| 0054 | 105.470 | 32.658 | 2.8 | 105.437 | 32.635 | 2.8 | 105.425 | 32.643 | 5.5 | 105.459 | 32.666 | 5.5 | 0.32 | 0.07 | 0.33 |
| 0055 | 105.437 | 32.635 | 2.8 | 105.404 | 32.612 | 2.8 | 105.392 | 32.620 | 5.5 | 105.425 | 32.643 | 5.5 | 0.64 | 0.42 | 0.77 |
| 0056 | 105.404 | 32.612 | 2.8 | 105.371 | 32.590 | 2.8 | 105.359 | 32.598 | 5.5 | 105.392 | 32.620 | 5.5 | 0.77 | 0.80 | 1.11 |
| 0057 | 105.371 | 32.590 | 2.8 | 105.338 | 32.567 | 2.8 | 105.326 | 32.575 | 5.5 | 105.359 | 32.598 | 5.5 | 0.77 | 0.70 | 1.04 |
| 0058 | 105.338 | 32.567 | 2.8 | 105.305 | 32.544 | 2.8 | 105.293 | 32.552 | 5.5 | 105.326 | 32.575 | 5.5 | 0.32 | 0.44 | 0.54 |
| 0059 | 105.305 | 32.544 | 2.8 | 105.272 | 32.522 | 2.8 | 105.260 | 32.530 | 5.5 | 105.293 | 32.552 | 5.5 | 0.04 | 0.86 | 0.87 |
| 0060 | 105.272 | 32.522 | 2.8 | 105.239 | 32.499 | 2.8 | 105.228 | 32.507 | 5.5 | 105.260 | 32.530 | 5.5 | 1.19 | 1.82 | 2.17 |
| 0061 | 105.239 | 32.499 | 2.8 | 105.206 | 32.476 | 2.8 | 105.195 | 32.484 | 5.5 | 105.228 | 32.507 | 5.5 | 2.58 | 2.19 | 3.38 |
| 0062 | 105.206 | 32.476 | 2.8 | 105.173 | 32.454 | 2.8 | 105.162 | 32.462 | 5.5 | 105.195 | 32.484 | 5.5 | 3.09 | 2.35 | 3.88 |
| 0063 | 105.173 | 32.454 | 2.8 | 105.140 | 32.431 | 2.8 | 105.129 | 32.439 | 5.5 | 105.162 | 32.462 | 5.5 | 3.61 | 2.46 | 4.37 |
| 0064 | 105.140 | 32.431 | 2.8 | 105.107 | 32.408 | 2.8 | 105.096 | 32.416 | 5.5 | 105.129 | 32.439 | 5.5 | 3.93 | 2.43 | 4.63 |
| 0065 | 105.107 | 32.408 | 2.8 | 105.074 | 32.386 | 2.8 | 105.062 | 32.394 | 5.5 | 105.096 | 32.416 | 5.5 | 3.21 | 2.56 | 4.10 |
| 0066 | 105.074 | 32.386 | 2.8 | 105.041 | 32.363 | 2.8 | 105.029 | 32.371 | 5.5 | 105.062 | 32.394 | 5.5 | 3.04 | 2.36 | 3.85 |
| 0067 | 105.041 | 32.363 | 2.8 | 105.008 | 32.340 | 2.8 | 104.996 | 32.348 | 5.5 | 105.029 | 32.371 | 5.5 | 4.49 | 0.89 | 4.57 |
| 0068 | 105.008 | 32.340 | 2.8 | 104.975 | 32.318 | 2.8 | 104.963 | 32.326 | 5.5 | 104.996 | 32.348 | 5.5 | 6.44 | 0.00 | 6.44 |
| 0069 | 104.975 | 32.318 | 2.8 | 104.942 | 32.295 | 2.8 | 104.930 | 32.303 | 5.5 | 104.963 | 32.326 | 5.5 | 7.63 | 0.00 | 7.63 |
| 0070 | 104.942 | 32.295 | 2.8 | 104.909 | 32.272 | 2.8 | 104.897 | 32.280 | 5.5 | 104.930 | 32.303 | 5.5 | 7.41 | 0.89 | 7.46 |
| 0071 | 104.909 | 32.272 | 2.8 | 104.876 | 32.250 | 2.8 | 104.865 | 32.258 | 5.5 | 104.897 | 32.280 | 5.5 | 6.13 | 2.72 | 6.70 |
| 0072 | 104.876 | 32.250 | 2.8 | 104.843 | 32.227 | 2.8 | 104.832 | 32.235 | 5.5 | 104.865 | 32.258 | 5.5 | 4.78 | 4.30 | 6.43 |
| 0073 | 104.843 | 32.226 | 2.8 | 104.815 | 32.201 | 2.8 | 104.805 | 32.210 | 5.5 | 104.832 | 32.235 | 5.5 | 4.08 | 4.14 | 5.81 |
| 0074 | 104.815 | 32.201 | 2.8 | 104.787 | 32.176 | 2.8 | 104.777 | 32.185 | 5.5 | 104.805 | 32.210 | 5.5 | 4.05 | 3.06 | 5.08 |
| 0075 | 104.787 | 32.176 | 2.8 | 104.760 | 32.151 | 2.8 | 104.750 | 32.160 | 5.5 | 104.777 | 32.185 | 5.5 | 4.53 | 2.12 | 5.00 |
| 0076 | 104.760 | 32.151 | 2.8 | 104.733 | 32.126 | 2.8 | 104.723 | 32.135 | 5.5 | 104.750 | 32.160 | 5.5 | 4.09 | 1.30 | 4.29 |
| 0077 | 104.733 | 32.126 | 2.8 | 104.706 | 32.101 | 2.8 | 104.696 | 32.110 | 5.5 | 104.723 | 32.135 | 5.5 | 2.24 | 1.27 | 2.57 |
| 0078 | 104.706 | 32.101 | 2.8 | 104.678 | 32.076 | 2.8 | 104.668 | 32.085 | 5.5 | 104.696 | 32.110 | 5.5 | 2.32 | 2.26 | 3.24 |
| 0079 | 104.678 | 32.076 | 2.8 | 104.651 | 32.051 | 2.8 | 104.641 | 32.060 | 5.5 | 104.668 | 32.085 | 5.5 | 3.48 | 3.01 | 4.60 |
| 0080 | 104.651 | 32.051 | 2.8 | 104.624 | 32.026 | 2.8 | 104.614 | 32.035 | 5.5 | 104.641 | 32.060 | 5.5 | 4.29 | 3.53 | 5.56 |
| 0081 | 104.624 | 32.026 | 2.8 | 104.597 | 32.001 | 2.8 | 104.587 | 32.010 | 5.5 | 104.614 | 32.035 | 5.5 | 4.47 | 4.53 | 6.37 |
| 0082 | 104.597 | 32.001 | 2.8 | 104.570 | 31.976 | 2.8 | 104.559 | 31.985 | 5.5 | 104.587 | 32.010 | 5.5 | 4.29 | 5.64 | 7.09 |
| 0083 | 104.570 | 31.976 | 2.8 | 104.542 | 31.951 | 2.8 | 104.532 | 31.960 | 5.5 | 104.559 | 31.985 | 5.5 | 3.66 | 5.74 | 6.80 |
| 0084 | 104.542 | 31.951 | 2.8 | 104.515 | 31.926 | 2.8 | 104.505 | 31.935 | 5.5 | 104.532 | 31.960 | 5.5 | 2.71 | 3.96 | 4.80 |
| 0085 | 105.824 | 32.917 | 5.5 | 105.791 | 32.894 | 5.5 | 105.778 | 32.903 | 8.1 | 105.811 | 32.925 | 8.1 | 1.00 | 1.00 | 1.41 |
| 0086 | 105.791 | 32.894 | 5.5 | 105.758 | 32.872 | 5.5 | 105.745 | 32.880 | 8.1 | 105.778 | 32.903 | 8.1 | 0.23 | 0.21 | 0.31 |



|      |         |        |     |         |        |     |         |        |      |         |        |      |      |      |      |
|------|---------|--------|-----|---------|--------|-----|---------|--------|------|---------|--------|------|------|------|------|
| 0087 | 105.758 | 32.872 | 5.5 | 105.725 | 32.849 | 5.5 | 105.712 | 32.857 | 8.1  | 105.745 | 32.880 | 8.1  | 0.00 | 0.00 | 0.00 |
| 0088 | 105.725 | 32.849 | 5.5 | 105.692 | 32.826 | 5.5 | 105.679 | 32.835 | 8.1  | 105.712 | 32.857 | 8.1  | 0.00 | 0.00 | 0.00 |
| 0089 | 105.692 | 32.826 | 5.5 | 105.659 | 32.803 | 5.5 | 105.646 | 32.812 | 8.1  | 105.679 | 32.835 | 8.1  | 0.00 | 0.00 | 0.00 |
| 0090 | 105.659 | 32.803 | 5.5 | 105.626 | 32.781 | 5.5 | 105.613 | 32.789 | 8.1  | 105.646 | 32.812 | 8.1  | 0.00 | 0.00 | 0.00 |
| 0091 | 105.626 | 32.781 | 5.5 | 105.593 | 32.758 | 5.5 | 105.580 | 32.767 | 8.1  | 105.613 | 32.789 | 8.1  | 0.00 | 0.00 | 0.00 |
| 0092 | 105.593 | 32.758 | 5.5 | 105.560 | 32.736 | 5.5 | 105.547 | 32.744 | 8.1  | 105.580 | 32.767 | 8.1  | 0.10 | 0.00 | 0.10 |
| 0093 | 105.560 | 32.736 | 5.5 | 105.527 | 32.713 | 5.5 | 105.514 | 32.721 | 8.1  | 105.547 | 32.744 | 8.1  | 0.38 | 0.00 | 0.38 |
| 0094 | 105.527 | 32.713 | 5.5 | 105.494 | 32.690 | 5.5 | 105.481 | 32.699 | 8.1  | 105.514 | 32.721 | 8.1  | 0.58 | 0.00 | 0.58 |
| 0095 | 105.494 | 32.690 | 5.5 | 105.461 | 32.667 | 5.5 | 105.448 | 32.676 | 8.1  | 105.481 | 32.699 | 8.1  | 0.45 | 0.00 | 0.45 |
| 0096 | 105.461 | 32.667 | 5.5 | 105.428 | 32.645 | 5.5 | 105.415 | 32.653 | 8.1  | 105.448 | 32.676 | 8.1  | 0.16 | 0.00 | 0.16 |
| 0097 | 105.428 | 32.645 | 5.5 | 105.395 | 32.622 | 5.5 | 105.382 | 32.631 | 8.1  | 105.415 | 32.653 | 8.1  | 0.19 | 0.22 | 0.29 |
| 0098 | 105.395 | 32.622 | 5.5 | 105.362 | 32.599 | 5.5 | 105.349 | 32.608 | 8.1  | 105.382 | 32.631 | 8.1  | 0.38 | 0.52 | 0.64 |
| 0099 | 105.362 | 32.599 | 5.5 | 105.329 | 32.577 | 5.5 | 105.316 | 32.585 | 8.1  | 105.349 | 32.608 | 8.1  | 0.73 | 0.41 | 0.84 |
| 0100 | 105.329 | 32.577 | 5.5 | 105.296 | 32.554 | 5.5 | 105.283 | 32.563 | 8.1  | 105.316 | 32.585 | 8.1  | 0.66 | 0.16 | 0.68 |
| 0101 | 105.296 | 32.554 | 5.5 | 105.263 | 32.532 | 5.5 | 105.250 | 32.540 | 8.1  | 105.283 | 32.563 | 8.1  | 0.48 | 0.63 | 0.79 |
| 0102 | 105.263 | 32.532 | 5.5 | 105.230 | 32.509 | 5.5 | 105.217 | 32.517 | 8.1  | 105.250 | 32.540 | 8.1  | 1.42 | 1.80 | 2.29 |
| 0103 | 105.230 | 32.509 | 5.5 | 105.197 | 32.486 | 5.5 | 105.184 | 32.495 | 8.1  | 105.217 | 32.517 | 8.1  | 2.71 | 2.49 | 3.68 |
| 0104 | 105.197 | 32.486 | 5.5 | 105.164 | 32.464 | 5.5 | 105.151 | 32.472 | 8.1  | 105.184 | 32.495 | 8.1  | 3.29 | 2.65 | 4.23 |
| 0105 | 105.164 | 32.464 | 5.5 | 105.131 | 32.441 | 5.5 | 105.118 | 32.449 | 8.1  | 105.151 | 32.472 | 8.1  | 3.59 | 2.41 | 4.33 |
| 0106 | 105.131 | 32.441 | 5.5 | 105.098 | 32.418 | 5.5 | 105.085 | 32.427 | 8.1  | 105.118 | 32.449 | 8.1  | 3.53 | 1.81 | 3.97 |
| 0107 | 105.098 | 32.418 | 5.5 | 105.065 | 32.395 | 5.5 | 105.052 | 32.404 | 8.1  | 105.085 | 32.427 | 8.1  | 2.91 | 1.31 | 3.19 |
| 0108 | 105.065 | 32.395 | 5.5 | 105.032 | 32.373 | 5.5 | 105.019 | 32.381 | 8.1  | 105.052 | 32.404 | 8.1  | 2.88 | 0.88 | 3.01 |
| 0109 | 105.032 | 32.373 | 5.5 | 104.999 | 32.350 | 5.5 | 104.986 | 32.359 | 8.1  | 105.019 | 32.381 | 8.1  | 4.09 | 0.25 | 4.09 |
| 0110 | 104.999 | 32.350 | 5.5 | 104.966 | 32.328 | 5.5 | 104.953 | 32.336 | 8.1  | 104.986 | 32.359 | 8.1  | 5.80 | 0.00 | 5.80 |
| 0111 | 104.966 | 32.328 | 5.5 | 104.933 | 32.305 | 5.5 | 104.920 | 32.313 | 8.1  | 104.953 | 32.336 | 8.1  | 6.86 | 0.00 | 6.86 |
| 0112 | 104.933 | 32.305 | 5.5 | 104.900 | 32.282 | 5.5 | 104.887 | 32.291 | 8.1  | 104.920 | 32.313 | 8.1  | 6.65 | 0.36 | 6.66 |
| 0113 | 104.900 | 32.282 | 5.5 | 104.867 | 32.259 | 5.5 | 104.854 | 32.268 | 8.1  | 104.887 | 32.291 | 8.1  | 5.56 | 1.27 | 5.70 |
| 0114 | 104.867 | 32.259 | 5.5 | 104.834 | 32.237 | 5.5 | 104.821 | 32.245 | 8.1  | 104.854 | 32.268 | 8.1  | 4.53 | 2.06 | 4.98 |
| 0115 | 104.834 | 32.237 | 5.5 | 104.804 | 32.210 | 5.5 | 104.793 | 32.220 | 8.1  | 104.820 | 32.245 | 8.1  | 4.17 | 2.00 | 4.63 |
| 0116 | 104.804 | 32.210 | 5.5 | 104.777 | 32.185 | 5.5 | 104.766 | 32.195 | 8.1  | 104.793 | 32.220 | 8.1  | 4.25 | 1.34 | 4.46 |
| 0117 | 104.777 | 32.185 | 5.5 | 104.749 | 32.160 | 5.5 | 104.739 | 32.170 | 8.1  | 104.766 | 32.195 | 8.1  | 4.43 | 0.64 | 4.47 |
| 0118 | 104.749 | 32.160 | 5.5 | 104.722 | 32.135 | 5.5 | 104.711 | 32.145 | 8.1  | 104.739 | 32.170 | 8.1  | 3.81 | 0.00 | 3.81 |
| 0119 | 104.722 | 32.135 | 5.5 | 104.695 | 32.110 | 5.5 | 104.684 | 32.120 | 8.1  | 104.711 | 32.145 | 8.1  | 2.19 | 0.00 | 2.19 |
| 0120 | 104.695 | 32.110 | 5.5 | 104.668 | 32.085 | 5.5 | 104.657 | 32.095 | 8.1  | 104.684 | 32.120 | 8.1  | 1.49 | 0.07 | 1.49 |
| 0121 | 104.668 | 32.085 | 5.5 | 104.640 | 32.060 | 5.5 | 104.630 | 32.070 | 8.1  | 104.657 | 32.095 | 8.1  | 1.80 | 0.40 | 1.84 |
| 0122 | 104.640 | 32.060 | 5.5 | 104.613 | 32.035 | 5.5 | 104.602 | 32.045 | 8.1  | 104.630 | 32.070 | 8.1  | 2.19 | 0.89 | 2.37 |
| 0123 | 104.613 | 32.035 | 5.5 | 104.586 | 32.010 | 5.5 | 104.575 | 32.020 | 8.1  | 104.602 | 32.045 | 8.1  | 2.18 | 2.08 | 3.02 |
| 0124 | 104.586 | 32.010 | 5.5 | 104.559 | 31.985 | 5.5 | 104.548 | 31.995 | 8.1  | 104.575 | 32.020 | 8.1  | 2.07 | 3.69 | 4.23 |
| 0125 | 104.559 | 31.985 | 5.5 | 104.531 | 31.960 | 5.5 | 104.521 | 31.970 | 8.1  | 104.548 | 31.995 | 8.1  | 1.96 | 4.22 | 4.65 |
| 0126 | 104.531 | 31.960 | 5.5 | 104.504 | 31.935 | 5.5 | 104.493 | 31.945 | 8.1  | 104.521 | 31.970 | 8.1  | 1.78 | 2.34 | 2.94 |
| 0127 | 105.814 | 32.927 | 8.1 | 105.781 | 32.905 | 8.1 | 105.764 | 32.916 | 10.3 | 105.797 | 32.939 | 10.3 | 0.83 | 0.53 | 0.98 |
| 0128 | 105.781 | 32.905 | 8.1 | 105.748 | 32.882 | 8.1 | 105.731 | 32.894 | 10.3 | 105.764 | 32.916 | 10.3 | 0.15 | 0.04 | 0.16 |
| 0129 | 105.748 | 32.882 | 8.1 | 105.715 | 32.859 | 8.1 | 105.698 | 32.871 | 10.3 | 105.731 | 32.894 | 10.3 | 0.00 | 0.00 | 0.00 |
| 0130 | 105.715 | 32.859 | 8.1 | 105.682 | 32.837 | 8.1 | 105.665 | 32.848 | 10.3 | 105.698 | 32.871 | 10.3 | 0.00 | 0.00 | 0.00 |
| 0131 | 105.682 | 32.837 | 8.1 | 105.649 | 32.814 | 8.1 | 105.632 | 32.825 | 10.3 | 105.665 | 32.848 | 10.3 | 0.00 | 0.00 | 0.00 |

|      |         |        |      |         |        |      |         |        |      |         |        |      |      |      |      |
|------|---------|--------|------|---------|--------|------|---------|--------|------|---------|--------|------|------|------|------|
| 0132 | 105.649 | 32.814 | 8.1  | 105.616 | 32.791 | 8.1  | 105.599 | 32.803 | 10.3 | 105.632 | 32.825 | 10.3 | 0.00 | 0.00 | 0.00 |
| 0133 | 105.616 | 32.791 | 8.1  | 105.583 | 32.769 | 8.1  | 105.566 | 32.780 | 10.3 | 105.599 | 32.803 | 10.3 | 0.00 | 0.00 | 0.00 |
| 0134 | 105.583 | 32.769 | 8.1  | 105.550 | 32.746 | 8.1  | 105.533 | 32.758 | 10.3 | 105.566 | 32.780 | 10.3 | 0.20 | 0.00 | 0.20 |
| 0135 | 105.550 | 32.746 | 8.1  | 105.517 | 32.723 | 8.1  | 105.500 | 32.735 | 10.3 | 105.533 | 32.758 | 10.3 | 0.60 | 0.00 | 0.60 |
| 0136 | 105.517 | 32.723 | 8.1  | 105.484 | 32.701 | 8.1  | 105.467 | 32.712 | 10.3 | 105.500 | 32.735 | 10.3 | 0.80 | 0.00 | 0.80 |
| 0137 | 105.484 | 32.701 | 8.1  | 105.451 | 32.678 | 8.1  | 105.434 | 32.689 | 10.3 | 105.467 | 32.712 | 10.3 | 0.48 | 0.00 | 0.48 |
| 0138 | 105.451 | 32.678 | 8.1  | 105.418 | 32.655 | 8.1  | 105.401 | 32.667 | 10.3 | 105.434 | 32.689 | 10.3 | 0.03 | 0.00 | 0.03 |
| 0139 | 105.418 | 32.655 | 8.1  | 105.385 | 32.633 | 8.1  | 105.368 | 32.644 | 10.3 | 105.401 | 32.667 | 10.3 | 0.00 | 0.00 | 0.00 |
| 0140 | 105.385 | 32.633 | 8.1  | 105.352 | 32.610 | 8.1  | 105.335 | 32.621 | 10.3 | 105.368 | 32.644 | 10.3 | 0.16 | 0.12 | 0.20 |
| 0141 | 105.352 | 32.610 | 8.1  | 105.319 | 32.587 | 8.1  | 105.302 | 32.599 | 10.3 | 105.335 | 32.621 | 10.3 | 0.65 | 0.07 | 0.66 |
| 0142 | 105.319 | 32.587 | 8.1  | 105.286 | 32.565 | 8.1  | 105.269 | 32.576 | 10.3 | 105.302 | 32.599 | 10.3 | 0.80 | 0.00 | 0.80 |
| 0143 | 105.286 | 32.565 | 8.1  | 105.253 | 32.542 | 8.1  | 105.236 | 32.553 | 10.3 | 105.269 | 32.576 | 10.3 | 0.66 | 0.31 | 0.73 |
| 0144 | 105.253 | 32.542 | 8.1  | 105.220 | 32.519 | 8.1  | 105.203 | 32.531 | 10.3 | 105.236 | 32.553 | 10.3 | 1.25 | 1.38 | 1.86 |
| 0145 | 105.220 | 32.519 | 8.1  | 105.187 | 32.497 | 8.1  | 105.170 | 32.508 | 10.3 | 105.203 | 32.531 | 10.3 | 2.23 | 2.17 | 3.11 |
| 0146 | 105.187 | 32.497 | 8.1  | 105.154 | 32.474 | 8.1  | 105.137 | 32.485 | 10.3 | 105.170 | 32.508 | 10.3 | 2.77 | 2.27 | 3.58 |
| 0147 | 105.154 | 32.474 | 8.1  | 105.121 | 32.451 | 8.1  | 105.104 | 32.463 | 10.3 | 105.137 | 32.485 | 10.3 | 2.83 | 1.78 | 3.34 |
| 0148 | 105.121 | 32.451 | 8.1  | 105.088 | 32.429 | 8.1  | 105.071 | 32.440 | 10.3 | 105.104 | 32.463 | 10.3 | 2.48 | 0.95 | 2.65 |
| 0149 | 105.088 | 32.429 | 8.1  | 105.055 | 32.406 | 8.1  | 105.038 | 32.417 | 10.3 | 105.071 | 32.440 | 10.3 | 1.94 | 0.28 | 1.96 |
| 0150 | 105.055 | 32.406 | 8.1  | 105.022 | 32.383 | 8.1  | 105.005 | 32.395 | 10.3 | 105.038 | 32.417 | 10.3 | 2.01 | 0.00 | 2.01 |
| 0151 | 105.022 | 32.383 | 8.1  | 104.989 | 32.361 | 8.1  | 104.972 | 32.372 | 10.3 | 105.005 | 32.395 | 10.3 | 3.07 | 0.00 | 3.07 |
| 0152 | 104.989 | 32.361 | 8.1  | 104.956 | 32.338 | 8.1  | 104.939 | 32.349 | 10.3 | 104.972 | 32.372 | 10.3 | 4.58 | 0.00 | 4.58 |
| 0153 | 104.956 | 32.338 | 8.1  | 104.922 | 32.315 | 8.1  | 104.906 | 32.327 | 10.3 | 104.939 | 32.349 | 10.3 | 5.55 | 0.00 | 5.55 |
| 0154 | 104.922 | 32.315 | 8.1  | 104.889 | 32.293 | 8.1  | 104.873 | 32.304 | 10.3 | 104.906 | 32.327 | 10.3 | 5.42 | 0.00 | 5.42 |
| 0155 | 104.889 | 32.293 | 8.1  | 104.856 | 32.270 | 8.1  | 104.840 | 32.281 | 10.3 | 104.873 | 32.304 | 10.3 | 4.53 | 0.00 | 4.53 |
| 0156 | 104.856 | 32.270 | 8.1  | 104.823 | 32.247 | 8.1  | 104.807 | 32.259 | 10.3 | 104.840 | 32.281 | 10.3 | 3.68 | 0.00 | 3.68 |
| 0157 | 104.820 | 32.244 | 8.1  | 104.792 | 32.219 | 8.1  | 104.778 | 32.232 | 10.3 | 104.805 | 32.257 | 10.3 | 3.41 | 0.12 | 3.41 |
| 0158 | 104.792 | 32.219 | 8.1  | 104.765 | 32.194 | 8.1  | 104.751 | 32.207 | 10.3 | 104.778 | 32.232 | 10.3 | 3.49 | 0.06 | 3.49 |
| 0159 | 104.765 | 32.194 | 8.1  | 104.738 | 32.169 | 8.1  | 104.723 | 32.182 | 10.3 | 104.751 | 32.207 | 10.3 | 3.59 | 0.00 | 3.59 |
| 0160 | 104.738 | 32.169 | 8.1  | 104.710 | 32.144 | 8.1  | 104.696 | 32.157 | 10.3 | 104.723 | 32.182 | 10.3 | 3.08 | 0.00 | 3.08 |
| 0161 | 104.710 | 32.144 | 8.1  | 104.683 | 32.119 | 8.1  | 104.669 | 32.132 | 10.3 | 104.696 | 32.157 | 10.3 | 1.81 | 0.61 | 1.91 |
| 0162 | 104.683 | 32.119 | 8.1  | 104.656 | 32.094 | 8.1  | 104.641 | 32.107 | 10.3 | 104.669 | 32.132 | 10.3 | 0.79 | 0.37 | 0.87 |
| 0163 | 104.656 | 32.094 | 8.1  | 104.629 | 32.069 | 8.1  | 104.614 | 32.082 | 10.3 | 104.641 | 32.107 | 10.3 | 0.49 | 0.35 | 0.61 |
| 0164 | 104.629 | 32.069 | 8.1  | 104.602 | 32.044 | 8.1  | 104.587 | 32.057 | 10.3 | 104.614 | 32.082 | 10.3 | 0.54 | 0.77 | 0.94 |
| 0165 | 104.602 | 32.044 | 8.1  | 104.574 | 32.019 | 8.1  | 104.560 | 32.032 | 10.3 | 104.587 | 32.057 | 10.3 | 0.48 | 2.02 | 2.07 |
| 0166 | 104.574 | 32.019 | 8.1  | 104.547 | 31.994 | 8.1  | 104.532 | 32.007 | 10.3 | 104.560 | 32.032 | 10.3 | 0.46 | 3.69 | 3.72 |
| 0167 | 104.547 | 31.994 | 8.1  | 104.520 | 31.969 | 8.1  | 104.505 | 31.982 | 10.3 | 104.532 | 32.007 | 10.3 | 0.58 | 4.19 | 4.23 |
| 0168 | 104.520 | 31.969 | 8.1  | 104.493 | 31.944 | 8.1  | 104.478 | 31.957 | 10.3 | 104.505 | 31.982 | 10.3 | 0.73 | 1.52 | 1.68 |
| 0169 | 105.800 | 32.941 | 10.3 | 105.767 | 32.919 | 10.3 | 105.748 | 32.932 | 12.2 | 105.781 | 32.955 | 12.2 | 0.31 | 0.58 | 0.66 |
| 0170 | 105.767 | 32.919 | 10.3 | 105.734 | 32.896 | 10.3 | 105.715 | 32.909 | 12.2 | 105.748 | 32.932 | 12.2 | 0.02 | 1.00 | 1.00 |
| 0171 | 105.734 | 32.896 | 10.3 | 105.701 | 32.873 | 10.3 | 105.682 | 32.887 | 12.2 | 105.715 | 32.909 | 12.2 | 0.00 | 1.00 | 1.00 |
| 0172 | 105.701 | 32.873 | 10.3 | 105.668 | 32.851 | 10.3 | 105.649 | 32.864 | 12.2 | 105.682 | 32.887 | 12.2 | 0.00 | 1.00 | 1.00 |
| 0173 | 105.668 | 32.851 | 10.3 | 105.635 | 32.828 | 10.3 | 105.616 | 32.841 | 12.2 | 105.649 | 32.864 | 12.2 | 0.00 | 1.07 | 1.07 |
| 0174 | 105.635 | 32.828 | 10.3 | 105.602 | 32.805 | 10.3 | 105.583 | 32.819 | 12.2 | 105.616 | 32.841 | 12.2 | 0.00 | 1.16 | 1.16 |
| 0175 | 105.602 | 32.805 | 10.3 | 105.569 | 32.783 | 10.3 | 105.550 | 32.796 | 12.2 | 105.583 | 32.819 | 12.2 | 0.00 | 1.19 | 1.19 |
| 0176 | 105.569 | 32.783 | 10.3 | 105.536 | 32.760 | 10.3 | 105.517 | 32.773 | 12.2 | 105.550 | 32.796 | 12.2 | 0.25 | 1.12 | 1.15 |

|      |         |        |      |         |        |      |         |        |      |         |        |      |      |      |      |
|------|---------|--------|------|---------|--------|------|---------|--------|------|---------|--------|------|------|------|------|
| 0177 | 105.536 | 32.760 | 10.3 | 105.503 | 32.737 | 10.3 | 105.484 | 32.751 | 12.2 | 105.517 | 32.773 | 12.2 | 0.67 | 0.92 | 1.14 |
| 0178 | 105.503 | 32.737 | 10.3 | 105.470 | 32.715 | 10.3 | 105.451 | 32.728 | 12.2 | 105.484 | 32.751 | 12.2 | 0.81 | 0.65 | 1.04 |
| 0179 | 105.470 | 32.715 | 10.3 | 105.437 | 32.692 | 10.3 | 105.418 | 32.705 | 12.2 | 105.451 | 32.728 | 12.2 | 0.45 | 0.47 | 0.65 |
| 0180 | 105.437 | 32.692 | 10.3 | 105.404 | 32.669 | 10.3 | 105.385 | 32.682 | 12.2 | 105.418 | 32.705 | 12.2 | 0.00 | 0.52 | 0.52 |
| 0181 | 105.404 | 32.669 | 10.3 | 105.371 | 32.647 | 10.3 | 105.352 | 32.660 | 12.2 | 105.385 | 32.682 | 12.2 | 0.00 | 0.75 | 0.75 |
| 0182 | 105.371 | 32.647 | 10.3 | 105.338 | 32.624 | 10.3 | 105.319 | 32.637 | 12.2 | 105.352 | 32.660 | 12.2 | 0.10 | 0.99 | 0.99 |
| 0183 | 105.338 | 32.624 | 10.3 | 105.305 | 32.601 | 10.3 | 105.286 | 32.614 | 12.2 | 105.319 | 32.637 | 12.2 | 0.56 | 0.99 | 1.14 |
| 0184 | 105.305 | 32.601 | 10.3 | 105.272 | 32.579 | 10.3 | 105.253 | 32.592 | 12.2 | 105.286 | 32.614 | 12.2 | 0.74 | 0.91 | 1.17 |
| 0185 | 105.272 | 32.579 | 10.3 | 105.239 | 32.556 | 10.3 | 105.220 | 32.569 | 12.2 | 105.253 | 32.592 | 12.2 | 0.55 | 1.22 | 1.34 |
| 0186 | 105.239 | 32.556 | 10.3 | 105.206 | 32.533 | 10.3 | 105.187 | 32.546 | 12.2 | 105.220 | 32.569 | 12.2 | 0.77 | 2.12 | 2.26 |
| 0187 | 105.206 | 32.533 | 10.3 | 105.173 | 32.511 | 10.3 | 105.154 | 32.524 | 12.2 | 105.187 | 32.546 | 12.2 | 1.38 | 2.85 | 3.17 |
| 0188 | 105.173 | 32.511 | 10.3 | 105.140 | 32.488 | 10.3 | 105.121 | 32.501 | 12.2 | 105.154 | 32.524 | 12.2 | 1.76 | 2.91 | 3.40 |
| 0189 | 105.140 | 32.488 | 10.3 | 105.107 | 32.465 | 10.3 | 105.088 | 32.478 | 12.2 | 105.121 | 32.501 | 12.2 | 1.68 | 2.37 | 2.91 |
| 0190 | 105.107 | 32.465 | 10.3 | 105.074 | 32.443 | 10.3 | 105.055 | 32.456 | 12.2 | 105.088 | 32.478 | 12.2 | 1.24 | 1.59 | 2.02 |
| 0191 | 105.074 | 32.443 | 10.3 | 105.041 | 32.420 | 10.3 | 105.022 | 32.433 | 12.2 | 105.055 | 32.456 | 12.2 | 0.81 | 0.98 | 1.27 |
| 0192 | 105.041 | 32.420 | 10.3 | 105.008 | 32.397 | 10.3 | 104.989 | 32.410 | 12.2 | 105.022 | 32.433 | 12.2 | 0.91 | 0.69 | 1.14 |
| 0193 | 105.008 | 32.397 | 10.3 | 104.975 | 32.375 | 10.3 | 104.956 | 32.388 | 12.2 | 104.989 | 32.410 | 12.2 | 1.79 | 0.60 | 1.89 |
| 0194 | 104.975 | 32.375 | 10.3 | 104.942 | 32.352 | 10.3 | 104.923 | 32.365 | 12.2 | 104.956 | 32.388 | 12.2 | 3.04 | 0.52 | 3.09 |
| 0195 | 104.942 | 32.352 | 10.3 | 104.909 | 32.329 | 10.3 | 104.890 | 32.342 | 12.2 | 104.923 | 32.365 | 12.2 | 3.86 | 0.41 | 3.88 |
| 0196 | 104.909 | 32.329 | 10.3 | 104.876 | 32.306 | 10.3 | 104.857 | 32.319 | 12.2 | 104.890 | 32.342 | 12.2 | 3.76 | 0.29 | 3.77 |
| 0197 | 104.876 | 32.306 | 10.3 | 104.843 | 32.284 | 10.3 | 104.824 | 32.297 | 12.2 | 104.857 | 32.319 | 12.2 | 3.02 | 0.18 | 3.03 |
| 0198 | 104.843 | 32.284 | 10.3 | 104.810 | 32.261 | 10.3 | 104.791 | 32.274 | 12.2 | 104.824 | 32.297 | 12.2 | 2.33 | 0.25 | 2.34 |
| 0199 | 104.810 | 32.261 | 10.3 | 104.777 | 32.231 | 10.3 | 104.760 | 32.246 | 12.2 | 104.791 | 32.274 | 12.2 | 2.15 | 0.00 | 2.15 |
| 0200 | 104.777 | 32.231 | 10.3 | 104.749 | 32.206 | 10.3 | 104.733 | 32.221 | 12.2 | 104.760 | 32.246 | 12.2 | 2.30 | 0.00 | 2.30 |
| 0201 | 104.749 | 32.206 | 10.3 | 104.722 | 32.181 | 10.3 | 104.706 | 32.197 | 12.2 | 104.733 | 32.221 | 12.2 | 2.46 | 0.00 | 2.46 |
| 0202 | 104.722 | 32.181 | 10.3 | 104.695 | 32.156 | 10.3 | 104.678 | 32.172 | 12.2 | 104.706 | 32.197 | 12.2 | 2.19 | 0.00 | 2.19 |
| 0203 | 104.695 | 32.156 | 10.3 | 104.668 | 32.131 | 10.3 | 104.651 | 32.146 | 12.2 | 104.678 | 32.172 | 12.2 | 1.34 | 0.69 | 1.50 |
| 0204 | 104.668 | 32.131 | 10.3 | 104.640 | 32.106 | 10.3 | 104.624 | 32.121 | 12.2 | 104.651 | 32.146 | 12.2 | 0.43 | 0.26 | 0.50 |
| 0205 | 104.640 | 32.106 | 10.3 | 104.613 | 32.081 | 10.3 | 104.597 | 32.096 | 12.2 | 104.624 | 32.121 | 12.2 | 0.00 | 0.00 | 0.00 |
| 0206 | 104.613 | 32.081 | 10.3 | 104.586 | 32.056 | 10.3 | 104.569 | 32.071 | 12.2 | 104.597 | 32.096 | 12.2 | 0.00 | 0.22 | 0.22 |
| 0207 | 104.586 | 32.056 | 10.3 | 104.559 | 32.031 | 10.3 | 104.542 | 32.046 | 12.2 | 104.569 | 32.071 | 12.2 | 0.00 | 1.31 | 1.31 |
| 0208 | 104.559 | 32.031 | 10.3 | 104.531 | 32.006 | 10.3 | 104.515 | 32.021 | 12.2 | 104.542 | 32.046 | 12.2 | 0.00 | 2.83 | 2.83 |
| 0209 | 104.531 | 32.006 | 10.3 | 104.504 | 31.981 | 10.3 | 104.488 | 31.996 | 12.2 | 104.515 | 32.021 | 12.2 | 0.01 | 3.24 | 3.24 |
| 0210 | 104.504 | 31.981 | 10.3 | 104.477 | 31.956 | 10.3 | 104.460 | 31.971 | 12.2 | 104.488 | 31.996 | 12.2 | 0.12 | 0.36 | 0.38 |
| 0211 | 105.785 | 32.958 | 12.2 | 105.752 | 32.935 | 12.2 | 105.730 | 32.950 | 13.7 | 105.763 | 32.972 | 13.7 | 0.00 | 0.00 | 0.00 |
| 0212 | 105.752 | 32.935 | 12.2 | 105.719 | 32.912 | 12.2 | 105.697 | 32.927 | 13.7 | 105.730 | 32.950 | 13.7 | 0.00 | 1.00 | 1.00 |
| 0213 | 105.719 | 32.912 | 12.2 | 105.686 | 32.890 | 12.2 | 105.664 | 32.904 | 13.7 | 105.697 | 32.927 | 13.7 | 0.00 | 0.88 | 0.88 |
| 0214 | 105.686 | 32.890 | 12.2 | 105.653 | 32.867 | 12.2 | 105.631 | 32.882 | 13.7 | 105.664 | 32.904 | 13.7 | 0.00 | 0.66 | 0.66 |
| 0215 | 105.653 | 32.867 | 12.2 | 105.620 | 32.844 | 12.2 | 105.598 | 32.859 | 13.7 | 105.631 | 32.882 | 13.7 | 0.00 | 0.61 | 0.61 |
| 0216 | 105.620 | 32.844 | 12.2 | 105.587 | 32.822 | 12.2 | 105.565 | 32.836 | 13.7 | 105.598 | 32.859 | 13.7 | 0.00 | 0.66 | 0.66 |
| 0217 | 105.587 | 32.822 | 12.2 | 105.554 | 32.799 | 12.2 | 105.532 | 32.814 | 13.7 | 105.565 | 32.836 | 13.7 | 0.01 | 0.69 | 0.69 |
| 0218 | 105.554 | 32.799 | 12.2 | 105.521 | 32.776 | 12.2 | 105.499 | 32.791 | 13.7 | 105.532 | 32.814 | 13.7 | 0.31 | 0.60 | 0.68 |
| 0219 | 105.521 | 32.776 | 12.2 | 105.488 | 32.754 | 12.2 | 105.466 | 32.768 | 13.7 | 105.499 | 32.791 | 13.7 | 0.69 | 0.39 | 0.80 |
| 0220 | 105.488 | 32.754 | 12.2 | 105.455 | 32.731 | 12.2 | 105.433 | 32.746 | 13.7 | 105.466 | 32.768 | 13.7 | 0.78 | 0.14 | 0.79 |
| 0221 | 105.455 | 32.731 | 12.2 | 105.422 | 32.708 | 12.2 | 105.400 | 32.723 | 13.7 | 105.433 | 32.746 | 13.7 | 0.42 | 0.00 | 0.42 |

|      |         |        |      |         |        |      |         |        |      |         |        |      |      |      |      |
|------|---------|--------|------|---------|--------|------|---------|--------|------|---------|--------|------|------|------|------|
| 0222 | 105.422 | 32.708 | 12.2 | 105.389 | 32.685 | 12.2 | 105.367 | 32.700 | 13.7 | 105.400 | 32.723 | 13.7 | 0.01 | 0.03 | 0.03 |
| 0223 | 105.389 | 32.685 | 12.2 | 105.356 | 32.663 | 12.2 | 105.334 | 32.678 | 13.7 | 105.367 | 32.700 | 13.7 | 0.00 | 0.23 | 0.23 |
| 0224 | 105.356 | 32.663 | 12.2 | 105.323 | 32.640 | 12.2 | 105.301 | 32.655 | 13.7 | 105.334 | 32.678 | 13.7 | 0.09 | 0.42 | 0.43 |
| 0225 | 105.323 | 32.640 | 12.2 | 105.290 | 32.617 | 12.2 | 105.268 | 32.632 | 13.7 | 105.301 | 32.655 | 13.7 | 0.46 | 0.43 | 0.63 |
| 0226 | 105.290 | 32.617 | 12.2 | 105.257 | 32.595 | 12.2 | 105.235 | 32.609 | 13.7 | 105.268 | 32.632 | 13.7 | 0.58 | 0.37 | 0.69 |
| 0227 | 105.257 | 32.595 | 12.2 | 105.224 | 32.572 | 12.2 | 105.202 | 32.587 | 13.7 | 105.235 | 32.609 | 13.7 | 0.32 | 0.56 | 0.65 |
| 0228 | 105.224 | 32.572 | 12.2 | 105.191 | 32.549 | 12.2 | 105.169 | 32.564 | 13.7 | 105.202 | 32.587 | 13.7 | 0.26 | 1.17 | 1.20 |
| 0229 | 105.191 | 32.549 | 12.2 | 105.158 | 32.527 | 12.2 | 105.136 | 32.541 | 13.7 | 105.169 | 32.564 | 13.7 | 0.55 | 1.69 | 1.78 |
| 0230 | 105.158 | 32.527 | 12.2 | 105.125 | 32.504 | 12.2 | 105.103 | 32.519 | 13.7 | 105.136 | 32.541 | 13.7 | 0.77 | 1.73 | 1.89 |
| 0231 | 105.125 | 32.504 | 12.2 | 105.092 | 32.481 | 12.2 | 105.070 | 32.496 | 13.7 | 105.103 | 32.519 | 13.7 | 0.66 | 1.32 | 1.48 |
| 0232 | 105.092 | 32.481 | 12.2 | 105.059 | 32.459 | 12.2 | 105.037 | 32.473 | 13.7 | 105.070 | 32.496 | 13.7 | 0.33 | 0.79 | 0.86 |
| 0233 | 105.059 | 32.459 | 12.2 | 105.026 | 32.436 | 12.2 | 105.004 | 32.451 | 13.7 | 105.037 | 32.473 | 13.7 | 0.09 | 0.42 | 0.42 |
| 0234 | 105.026 | 32.436 | 12.2 | 104.993 | 32.413 | 12.2 | 104.971 | 32.428 | 13.7 | 105.004 | 32.451 | 13.7 | 0.16 | 0.23 | 0.28 |
| 0235 | 104.993 | 32.413 | 12.2 | 104.960 | 32.391 | 12.2 | 104.938 | 32.405 | 13.7 | 104.971 | 32.428 | 13.7 | 0.72 | 0.13 | 0.73 |
| 0236 | 104.960 | 32.391 | 12.2 | 104.927 | 32.368 | 12.2 | 104.905 | 32.383 | 13.7 | 104.938 | 32.405 | 13.7 | 1.59 | 0.05 | 1.59 |
| 0237 | 104.927 | 32.368 | 12.2 | 104.894 | 32.345 | 12.2 | 104.872 | 32.360 | 13.7 | 104.905 | 32.383 | 13.7 | 2.15 | 0.00 | 2.15 |
| 0238 | 104.894 | 32.345 | 12.2 | 104.861 | 32.322 | 12.2 | 104.839 | 32.337 | 13.7 | 104.872 | 32.360 | 13.7 | 2.04 | 0.00 | 2.04 |
| 0239 | 104.861 | 32.322 | 12.2 | 104.828 | 32.300 | 12.2 | 104.806 | 32.315 | 13.7 | 104.839 | 32.337 | 13.7 | 1.47 | 0.00 | 1.47 |
| 0240 | 104.828 | 32.300 | 12.2 | 104.795 | 32.277 | 12.2 | 104.773 | 32.292 | 13.7 | 104.806 | 32.315 | 13.7 | 0.97 | 0.17 | 0.98 |
| 0241 | 104.786 | 32.270 | 12.2 | 104.759 | 32.245 | 12.2 | 104.740 | 32.263 | 13.7 | 104.767 | 32.288 | 13.7 | 0.92 | 0.00 | 0.92 |
| 0242 | 104.759 | 32.245 | 12.2 | 104.732 | 32.220 | 12.2 | 104.713 | 32.238 | 13.7 | 104.740 | 32.263 | 13.7 | 1.14 | 0.00 | 1.14 |
| 0243 | 104.732 | 32.220 | 12.2 | 104.704 | 32.195 | 12.2 | 104.686 | 32.213 | 13.7 | 104.713 | 32.238 | 13.7 | 1.40 | 0.00 | 1.40 |
| 0244 | 104.704 | 32.195 | 12.2 | 104.677 | 32.170 | 12.2 | 104.658 | 32.188 | 13.7 | 104.686 | 32.213 | 13.7 | 1.37 | 0.00 | 1.37 |
| 0245 | 104.677 | 32.170 | 12.2 | 104.650 | 32.145 | 12.2 | 104.631 | 32.163 | 13.7 | 104.658 | 32.188 | 13.7 | 0.91 | 0.79 | 1.20 |
| 0246 | 104.650 | 32.145 | 12.2 | 104.623 | 32.120 | 12.2 | 104.604 | 32.138 | 13.7 | 104.631 | 32.163 | 13.7 | 0.30 | 0.35 | 0.46 |
| 0247 | 104.623 | 32.120 | 12.2 | 104.595 | 32.095 | 12.2 | 104.577 | 32.112 | 13.7 | 104.604 | 32.138 | 13.7 | 0.00 | 0.00 | 0.00 |
| 0248 | 104.595 | 32.095 | 12.2 | 104.568 | 32.070 | 12.2 | 104.549 | 32.087 | 13.7 | 104.577 | 32.112 | 13.7 | 0.00 | 0.04 | 0.04 |
| 0249 | 104.568 | 32.070 | 12.2 | 104.541 | 32.045 | 12.2 | 104.522 | 32.062 | 13.7 | 104.549 | 32.087 | 13.7 | 0.00 | 0.93 | 0.93 |
| 0250 | 104.541 | 32.045 | 12.2 | 104.514 | 32.020 | 12.2 | 104.495 | 32.037 | 13.7 | 104.522 | 32.062 | 13.7 | 0.00 | 2.22 | 2.22 |
| 0251 | 104.514 | 32.020 | 12.2 | 104.486 | 31.995 | 12.2 | 104.468 | 32.012 | 13.7 | 104.495 | 32.037 | 13.7 | 0.00 | 2.57 | 2.57 |
| 0252 | 104.486 | 31.995 | 12.2 | 104.459 | 31.970 | 12.2 | 104.440 | 31.987 | 13.7 | 104.468 | 32.012 | 13.7 | 0.00 | 0.00 | 0.00 |
| 0253 | 105.767 | 32.976 | 13.7 | 105.734 | 32.953 | 13.7 | 105.711 | 32.969 | 14.8 | 105.744 | 32.992 | 14.8 | 0.00 | 0.00 | 0.00 |
| 0254 | 105.734 | 32.953 | 13.7 | 105.701 | 32.931 | 13.7 | 105.678 | 32.947 | 14.8 | 105.711 | 32.969 | 14.8 | 0.00 | 1.00 | 1.00 |
| 0255 | 105.701 | 32.931 | 13.7 | 105.668 | 32.908 | 13.7 | 105.645 | 32.924 | 14.8 | 105.678 | 32.947 | 14.8 | 0.00 | 0.67 | 0.67 |
| 0256 | 105.668 | 32.908 | 13.7 | 105.635 | 32.885 | 13.7 | 105.612 | 32.901 | 14.8 | 105.645 | 32.924 | 14.8 | 0.00 | 0.23 | 0.23 |
| 0257 | 105.635 | 32.885 | 13.7 | 105.602 | 32.862 | 13.7 | 105.579 | 32.879 | 14.8 | 105.612 | 32.901 | 14.8 | 0.00 | 0.04 | 0.04 |
| 0258 | 105.602 | 32.862 | 13.7 | 105.569 | 32.840 | 13.7 | 105.546 | 32.856 | 14.8 | 105.579 | 32.879 | 14.8 | 0.00 | 0.04 | 0.04 |
| 0259 | 105.569 | 32.840 | 13.7 | 105.536 | 32.817 | 13.7 | 105.513 | 32.833 | 14.8 | 105.546 | 32.856 | 14.8 | 0.09 | 0.06 | 0.11 |
| 0260 | 105.536 | 32.817 | 13.7 | 105.503 | 32.794 | 13.7 | 105.480 | 32.810 | 14.8 | 105.513 | 32.833 | 14.8 | 0.41 | 0.04 | 0.41 |
| 0261 | 105.503 | 32.794 | 13.7 | 105.470 | 32.772 | 13.7 | 105.447 | 32.788 | 14.8 | 105.480 | 32.810 | 14.8 | 0.75 | 0.00 | 0.75 |
| 0262 | 105.470 | 32.772 | 13.7 | 105.437 | 32.749 | 13.7 | 105.414 | 32.765 | 14.8 | 105.447 | 32.788 | 14.8 | 0.80 | 0.00 | 0.80 |
| 0263 | 105.437 | 32.749 | 13.7 | 105.404 | 32.726 | 13.7 | 105.381 | 32.742 | 14.8 | 105.414 | 32.765 | 14.8 | 0.47 | 0.00 | 0.47 |
| 0264 | 105.404 | 32.726 | 13.7 | 105.371 | 32.704 | 13.7 | 105.348 | 32.720 | 14.8 | 105.381 | 32.742 | 14.8 | 0.08 | 0.00 | 0.08 |
| 0265 | 105.371 | 32.704 | 13.7 | 105.338 | 32.681 | 13.7 | 105.315 | 32.697 | 14.8 | 105.348 | 32.720 | 14.8 | 0.00 | 0.00 | 0.00 |
| 0266 | 105.338 | 32.681 | 13.7 | 105.305 | 32.658 | 13.7 | 105.282 | 32.674 | 14.8 | 105.315 | 32.697 | 14.8 | 0.14 | 0.00 | 0.14 |

|      |         |        |      |         |        |      |         |        |      |         |        |      |      |      |      |
|------|---------|--------|------|---------|--------|------|---------|--------|------|---------|--------|------|------|------|------|
| 0267 | 105.305 | 32.658 | 13.7 | 105.272 | 32.636 | 13.7 | 105.249 | 32.652 | 14.8 | 105.282 | 32.674 | 14.8 | 0.44 | 0.00 | 0.44 |
| 0268 | 105.272 | 32.636 | 13.7 | 105.239 | 32.613 | 13.7 | 105.216 | 32.629 | 14.8 | 105.249 | 32.652 | 14.8 | 0.49 | 0.00 | 0.49 |
| 0269 | 105.239 | 32.613 | 13.7 | 105.206 | 32.590 | 13.7 | 105.183 | 32.606 | 14.8 | 105.216 | 32.629 | 14.8 | 0.19 | 0.00 | 0.19 |
| 0270 | 105.206 | 32.590 | 13.7 | 105.173 | 32.568 | 13.7 | 105.150 | 32.584 | 14.8 | 105.183 | 32.606 | 14.8 | 0.00 | 0.23 | 0.23 |
| 0271 | 105.173 | 32.568 | 13.7 | 105.140 | 32.545 | 13.7 | 105.117 | 32.561 | 14.8 | 105.150 | 32.584 | 14.8 | 0.08 | 0.47 | 0.48 |
| 0272 | 105.140 | 32.545 | 13.7 | 105.107 | 32.522 | 13.7 | 105.084 | 32.538 | 14.8 | 105.117 | 32.561 | 14.8 | 0.16 | 0.48 | 0.51 |
| 0273 | 105.107 | 32.522 | 13.7 | 105.074 | 32.499 | 13.7 | 105.051 | 32.515 | 14.8 | 105.084 | 32.538 | 14.8 | 0.12 | 0.29 | 0.31 |
| 0274 | 105.074 | 32.499 | 13.7 | 105.041 | 32.477 | 13.7 | 105.018 | 32.493 | 14.8 | 105.051 | 32.515 | 14.8 | 0.00 | 0.08 | 0.08 |
| 0275 | 105.041 | 32.477 | 13.7 | 105.008 | 32.454 | 13.7 | 104.985 | 32.470 | 14.8 | 105.018 | 32.493 | 14.8 | 0.00 | 0.00 | 0.00 |
| 0276 | 105.008 | 32.454 | 13.7 | 104.975 | 32.431 | 13.7 | 104.952 | 32.447 | 14.8 | 104.985 | 32.470 | 14.8 | 0.00 | 0.00 | 0.00 |
| 0277 | 104.975 | 32.431 | 13.7 | 104.942 | 32.409 | 13.7 | 104.919 | 32.425 | 14.8 | 104.952 | 32.447 | 14.8 | 0.16 | 0.00 | 0.16 |
| 0278 | 104.942 | 32.409 | 13.7 | 104.909 | 32.386 | 13.7 | 104.886 | 32.402 | 14.8 | 104.919 | 32.425 | 14.8 | 0.56 | 0.00 | 0.56 |
| 0279 | 104.909 | 32.386 | 13.7 | 104.876 | 32.363 | 13.7 | 104.853 | 32.379 | 14.8 | 104.886 | 32.402 | 14.8 | 0.84 | 0.00 | 0.84 |
| 0280 | 104.876 | 32.363 | 13.7 | 104.843 | 32.341 | 13.7 | 104.820 | 32.357 | 14.8 | 104.853 | 32.379 | 14.8 | 0.73 | 0.00 | 0.73 |
| 0281 | 104.843 | 32.341 | 13.7 | 104.810 | 32.318 | 13.7 | 104.787 | 32.334 | 14.8 | 104.820 | 32.357 | 14.8 | 0.38 | 0.00 | 0.38 |
| 0282 | 104.810 | 32.318 | 13.7 | 104.777 | 32.295 | 13.7 | 104.754 | 32.311 | 14.8 | 104.787 | 32.334 | 14.8 | 0.13 | 0.22 | 0.25 |
| 0283 | 104.766 | 32.286 | 13.7 | 104.739 | 32.261 | 13.7 | 104.718 | 32.280 | 14.8 | 104.746 | 32.305 | 14.8 | 0.16 | 0.00 | 0.16 |
| 0284 | 104.739 | 32.261 | 13.7 | 104.711 | 32.236 | 13.7 | 104.691 | 32.255 | 14.8 | 104.718 | 32.280 | 14.8 | 0.36 | 0.00 | 0.36 |
| 0285 | 104.711 | 32.236 | 13.7 | 104.684 | 32.211 | 13.7 | 104.664 | 32.230 | 14.8 | 104.691 | 32.255 | 14.8 | 0.63 | 0.00 | 0.63 |
| 0286 | 104.684 | 32.211 | 13.7 | 104.657 | 32.186 | 13.7 | 104.637 | 32.205 | 14.8 | 104.664 | 32.230 | 14.8 | 0.75 | 0.00 | 0.75 |
| 0287 | 104.657 | 32.186 | 13.7 | 104.630 | 32.161 | 13.7 | 104.609 | 32.180 | 14.8 | 104.637 | 32.205 | 14.8 | 0.58 | 0.93 | 1.09 |
| 0288 | 104.630 | 32.161 | 13.7 | 104.603 | 32.136 | 13.7 | 104.582 | 32.155 | 14.8 | 104.609 | 32.180 | 14.8 | 0.23 | 0.64 | 0.68 |
| 0289 | 104.603 | 32.136 | 13.7 | 104.575 | 32.111 | 13.7 | 104.555 | 32.130 | 14.8 | 104.582 | 32.155 | 14.8 | 0.00 | 0.32 | 0.32 |
| 0290 | 104.575 | 32.111 | 13.7 | 104.548 | 32.086 | 13.7 | 104.528 | 32.105 | 14.8 | 104.555 | 32.130 | 14.8 | 0.00 | 0.38 | 0.38 |
| 0291 | 104.548 | 32.086 | 13.7 | 104.521 | 32.061 | 13.7 | 104.500 | 32.080 | 14.8 | 104.528 | 32.105 | 14.8 | 0.00 | 1.11 | 1.11 |
| 0292 | 104.521 | 32.061 | 13.7 | 104.493 | 32.036 | 13.7 | 104.473 | 32.055 | 14.8 | 104.500 | 32.080 | 14.8 | 0.00 | 2.16 | 2.16 |
| 0293 | 104.493 | 32.036 | 13.7 | 104.466 | 32.011 | 13.7 | 104.446 | 32.030 | 14.8 | 104.473 | 32.055 | 14.8 | 0.00 | 2.39 | 2.39 |
| 0294 | 104.466 | 32.011 | 13.7 | 104.439 | 31.986 | 13.7 | 104.419 | 32.005 | 14.8 | 104.446 | 32.030 | 14.8 | 0.00 | 0.00 | 0.00 |
| 0295 | 105.748 | 32.996 | 14.7 | 105.715 | 32.973 | 14.7 | 105.691 | 32.990 | 15.3 | 105.724 | 33.013 | 15.3 | 0.00 | 0.00 | 0.00 |
| 0296 | 105.715 | 32.973 | 14.7 | 105.682 | 32.950 | 14.7 | 105.658 | 32.967 | 15.3 | 105.691 | 32.990 | 15.3 | 0.00 | 1.00 | 1.00 |
| 0297 | 105.682 | 32.950 | 14.7 | 105.649 | 32.928 | 14.7 | 105.625 | 32.944 | 15.3 | 105.658 | 32.967 | 15.3 | 0.00 | 0.66 | 0.66 |
| 0298 | 105.649 | 32.928 | 14.7 | 105.616 | 32.905 | 14.7 | 105.592 | 32.922 | 15.3 | 105.625 | 32.944 | 15.3 | 0.00 | 0.20 | 0.20 |
| 0299 | 105.616 | 32.905 | 14.7 | 105.583 | 32.882 | 14.7 | 105.559 | 32.899 | 15.3 | 105.592 | 32.922 | 15.3 | 0.00 | 0.00 | 0.00 |
| 0300 | 105.583 | 32.882 | 14.7 | 105.550 | 32.859 | 14.7 | 105.526 | 32.876 | 15.3 | 105.559 | 32.899 | 15.3 | 0.02 | 0.00 | 0.02 |
| 0301 | 105.550 | 32.859 | 14.7 | 105.517 | 32.837 | 14.7 | 105.493 | 32.854 | 15.3 | 105.526 | 32.876 | 15.3 | 0.21 | 0.00 | 0.21 |
| 0302 | 105.517 | 32.837 | 14.7 | 105.484 | 32.814 | 14.7 | 105.460 | 32.831 | 15.3 | 105.493 | 32.854 | 15.3 | 0.55 | 0.00 | 0.55 |
| 0303 | 105.484 | 32.814 | 14.7 | 105.451 | 32.791 | 14.7 | 105.427 | 32.808 | 15.3 | 105.460 | 32.831 | 15.3 | 0.86 | 0.00 | 0.86 |
| 0304 | 105.451 | 32.791 | 14.7 | 105.418 | 32.769 | 14.7 | 105.394 | 32.785 | 15.3 | 105.427 | 32.808 | 15.3 | 0.90 | 0.00 | 0.90 |
| 0305 | 105.418 | 32.769 | 14.7 | 105.385 | 32.746 | 14.7 | 105.361 | 32.763 | 15.3 | 105.394 | 32.785 | 15.3 | 0.64 | 0.00 | 0.64 |
| 0306 | 105.385 | 32.746 | 14.7 | 105.352 | 32.723 | 14.7 | 105.328 | 32.740 | 15.3 | 105.361 | 32.763 | 15.3 | 0.32 | 0.00 | 0.32 |
| 0307 | 105.352 | 32.723 | 14.7 | 105.319 | 32.701 | 14.7 | 105.295 | 32.717 | 15.3 | 105.328 | 32.740 | 15.3 | 0.21 | 0.00 | 0.21 |
| 0308 | 105.319 | 32.701 | 14.7 | 105.286 | 32.678 | 14.7 | 105.262 | 32.695 | 15.3 | 105.295 | 32.717 | 15.3 | 0.35 | 0.00 | 0.35 |
| 0309 | 105.286 | 32.678 | 14.7 | 105.253 | 32.655 | 14.7 | 105.229 | 32.672 | 15.3 | 105.262 | 32.695 | 15.3 | 0.57 | 0.00 | 0.57 |
| 0310 | 105.253 | 32.655 | 14.7 | 105.220 | 32.633 | 14.7 | 105.196 | 32.649 | 15.3 | 105.229 | 32.672 | 15.3 | 0.54 | 0.00 | 0.54 |
| 0311 | 105.220 | 32.633 | 14.7 | 105.187 | 32.610 | 14.7 | 105.163 | 32.627 | 15.3 | 105.196 | 32.649 | 15.3 | 0.22 | 0.00 | 0.22 |

|      |         |        |      |         |        |      |         |        |      |         |        |      |      |      |      |
|------|---------|--------|------|---------|--------|------|---------|--------|------|---------|--------|------|------|------|------|
| 0312 | 105.187 | 32.610 | 14.7 | 105.154 | 32.587 | 14.7 | 105.130 | 32.604 | 15.3 | 105.163 | 32.627 | 15.3 | 0.00 | 0.00 | 0.00 |
| 0313 | 105.154 | 32.587 | 14.7 | 105.121 | 32.565 | 14.7 | 105.097 | 32.581 | 15.3 | 105.130 | 32.604 | 15.3 | 0.00 | 0.00 | 0.00 |
| 0314 | 105.121 | 32.565 | 14.7 | 105.088 | 32.542 | 14.7 | 105.064 | 32.559 | 15.3 | 105.097 | 32.581 | 15.3 | 0.00 | 0.00 | 0.00 |
| 0315 | 105.088 | 32.542 | 14.7 | 105.055 | 32.519 | 14.7 | 105.031 | 32.536 | 15.3 | 105.064 | 32.559 | 15.3 | 0.00 | 0.00 | 0.00 |
| 0316 | 105.055 | 32.519 | 14.7 | 105.022 | 32.496 | 14.7 | 104.998 | 32.513 | 15.3 | 105.031 | 32.536 | 15.3 | 0.00 | 0.00 | 0.00 |
| 0317 | 105.022 | 32.496 | 14.7 | 104.989 | 32.474 | 14.7 | 104.965 | 32.490 | 15.3 | 104.998 | 32.513 | 15.3 | 0.00 | 0.00 | 0.00 |
| 0318 | 104.989 | 32.474 | 14.7 | 104.956 | 32.451 | 14.7 | 104.932 | 32.468 | 15.3 | 104.965 | 32.490 | 15.3 | 0.00 | 0.00 | 0.00 |
| 0319 | 104.956 | 32.451 | 14.7 | 104.923 | 32.428 | 14.7 | 104.899 | 32.445 | 15.3 | 104.932 | 32.468 | 15.3 | 0.00 | 0.00 | 0.00 |
| 0320 | 104.923 | 32.428 | 14.7 | 104.890 | 32.406 | 14.7 | 104.866 | 32.422 | 15.3 | 104.899 | 32.445 | 15.3 | 0.07 | 0.00 | 0.07 |
| 0321 | 104.890 | 32.406 | 14.7 | 104.857 | 32.383 | 14.7 | 104.833 | 32.400 | 15.3 | 104.866 | 32.422 | 15.3 | 0.14 | 0.00 | 0.14 |
| 0322 | 104.857 | 32.383 | 14.7 | 104.824 | 32.360 | 14.7 | 104.800 | 32.377 | 15.3 | 104.833 | 32.400 | 15.3 | 0.09 | 0.00 | 0.09 |
| 0323 | 104.824 | 32.360 | 14.7 | 104.791 | 32.338 | 14.7 | 104.767 | 32.354 | 15.3 | 104.800 | 32.377 | 15.3 | 0.00 | 0.00 | 0.00 |
| 0324 | 104.791 | 32.338 | 14.7 | 104.758 | 32.315 | 14.7 | 104.734 | 32.332 | 15.3 | 104.767 | 32.354 | 15.3 | 0.00 | 0.36 | 0.36 |
| 0325 | 104.744 | 32.304 | 14.7 | 104.717 | 32.279 | 14.7 | 104.695 | 32.298 | 15.3 | 104.723 | 32.323 | 15.3 | 0.00 | 0.00 | 0.00 |
| 0326 | 104.717 | 32.279 | 14.7 | 104.690 | 32.254 | 14.7 | 104.668 | 32.273 | 15.3 | 104.695 | 32.298 | 15.3 | 0.05 | 0.00 | 0.05 |
| 0327 | 104.690 | 32.254 | 14.7 | 104.662 | 32.229 | 14.7 | 104.641 | 32.248 | 15.3 | 104.668 | 32.273 | 15.3 | 0.21 | 0.00 | 0.21 |
| 0328 | 104.662 | 32.229 | 14.7 | 104.635 | 32.204 | 14.7 | 104.614 | 32.223 | 15.3 | 104.641 | 32.248 | 15.3 | 0.36 | 0.00 | 0.36 |
| 0329 | 104.635 | 32.204 | 14.7 | 104.608 | 32.179 | 14.7 | 104.587 | 32.198 | 15.3 | 104.614 | 32.223 | 15.3 | 0.36 | 1.00 | 1.06 |
| 0330 | 104.608 | 32.179 | 14.7 | 104.581 | 32.154 | 14.7 | 104.559 | 32.173 | 15.3 | 104.587 | 32.198 | 15.3 | 0.21 | 0.98 | 1.00 |
| 0331 | 104.581 | 32.154 | 14.7 | 104.553 | 32.129 | 14.7 | 104.532 | 32.148 | 15.3 | 104.559 | 32.173 | 15.3 | 0.05 | 0.89 | 0.89 |
| 0332 | 104.553 | 32.129 | 14.7 | 104.526 | 32.103 | 14.7 | 104.505 | 32.123 | 15.3 | 104.532 | 32.148 | 15.3 | 0.00 | 1.03 | 1.03 |
| 0333 | 104.526 | 32.103 | 14.7 | 104.499 | 32.078 | 14.7 | 104.478 | 32.098 | 15.3 | 104.505 | 32.123 | 15.3 | 0.00 | 1.61 | 1.61 |
| 0334 | 104.499 | 32.078 | 14.7 | 104.472 | 32.053 | 14.7 | 104.450 | 32.073 | 15.3 | 104.478 | 32.098 | 15.3 | 0.00 | 2.39 | 2.39 |
| 0335 | 104.472 | 32.053 | 14.7 | 104.444 | 32.029 | 14.7 | 104.423 | 32.048 | 15.3 | 104.450 | 32.073 | 15.3 | 0.00 | 2.43 | 2.43 |
| 0336 | 104.444 | 32.029 | 14.7 | 104.417 | 32.003 | 14.7 | 104.396 | 32.023 | 15.3 | 104.423 | 32.048 | 15.3 | 0.00 | 0.00 | 0.00 |
| 0337 | 105.729 | 33.016 | 15.3 | 105.696 | 32.994 | 15.3 | 105.671 | 33.011 | 15.6 | 105.704 | 33.033 | 15.6 | 0.00 | 0.00 | 0.00 |
| 0338 | 105.696 | 32.994 | 15.3 | 105.662 | 32.971 | 15.3 | 105.638 | 32.988 | 15.6 | 105.671 | 33.011 | 15.6 | 0.00 | 1.00 | 1.00 |
| 0339 | 105.662 | 32.971 | 15.3 | 105.629 | 32.948 | 15.3 | 105.605 | 32.965 | 15.6 | 105.638 | 32.988 | 15.6 | 0.00 | 0.87 | 0.87 |
| 0340 | 105.629 | 32.948 | 15.3 | 105.597 | 32.925 | 15.3 | 105.572 | 32.943 | 15.6 | 105.605 | 32.965 | 15.6 | 0.00 | 0.56 | 0.56 |
| 0341 | 105.597 | 32.925 | 15.3 | 105.564 | 32.903 | 15.3 | 105.539 | 32.920 | 15.6 | 105.572 | 32.943 | 15.6 | 0.00 | 0.38 | 0.38 |
| 0342 | 105.564 | 32.903 | 15.3 | 105.531 | 32.880 | 15.3 | 105.506 | 32.897 | 15.6 | 105.539 | 32.920 | 15.6 | 0.08 | 0.32 | 0.33 |
| 0343 | 105.531 | 32.880 | 15.3 | 105.498 | 32.857 | 15.3 | 105.473 | 32.874 | 15.6 | 105.506 | 32.897 | 15.6 | 0.32 | 0.28 | 0.42 |
| 0344 | 105.498 | 32.857 | 15.3 | 105.465 | 32.835 | 15.3 | 105.440 | 32.852 | 15.6 | 105.473 | 32.874 | 15.6 | 0.66 | 0.21 | 0.70 |
| 0345 | 105.465 | 32.835 | 15.3 | 105.431 | 32.812 | 15.3 | 105.407 | 32.829 | 15.6 | 105.440 | 32.852 | 15.6 | 0.94 | 0.13 | 0.95 |
| 0346 | 105.431 | 32.812 | 15.3 | 105.398 | 32.789 | 15.3 | 105.374 | 32.806 | 15.6 | 105.407 | 32.829 | 15.6 | 0.99 | 0.05 | 1.00 |
| 0347 | 105.398 | 32.789 | 15.3 | 105.365 | 32.767 | 15.3 | 105.341 | 32.784 | 15.6 | 105.374 | 32.806 | 15.6 | 0.85 | 0.00 | 0.85 |
| 0348 | 105.365 | 32.767 | 15.3 | 105.332 | 32.744 | 15.3 | 105.308 | 32.761 | 15.6 | 105.341 | 32.784 | 15.6 | 0.65 | 0.00 | 0.65 |
| 0349 | 105.332 | 32.744 | 15.3 | 105.299 | 32.721 | 15.3 | 105.275 | 32.738 | 15.6 | 105.308 | 32.761 | 15.6 | 0.57 | 0.01 | 0.57 |
| 0350 | 105.299 | 32.721 | 15.3 | 105.266 | 32.699 | 15.3 | 105.242 | 32.715 | 15.6 | 105.275 | 32.738 | 15.6 | 0.67 | 0.03 | 0.67 |
| 0351 | 105.266 | 32.699 | 15.3 | 105.233 | 32.676 | 15.3 | 105.209 | 32.693 | 15.6 | 105.242 | 32.715 | 15.6 | 0.77 | 0.02 | 0.77 |
| 0352 | 105.233 | 32.676 | 15.3 | 105.200 | 32.653 | 15.3 | 105.176 | 32.670 | 15.6 | 105.209 | 32.693 | 15.6 | 0.64 | 0.00 | 0.64 |
| 0353 | 105.200 | 32.653 | 15.3 | 105.167 | 32.630 | 15.3 | 105.143 | 32.647 | 15.6 | 105.176 | 32.670 | 15.6 | 0.29 | 0.00 | 0.29 |
| 0354 | 105.167 | 32.630 | 15.3 | 105.134 | 32.608 | 15.3 | 105.110 | 32.625 | 15.6 | 105.143 | 32.647 | 15.6 | 0.02 | 0.00 | 0.02 |
| 0355 | 105.134 | 32.608 | 15.3 | 105.101 | 32.585 | 15.3 | 105.077 | 32.602 | 15.6 | 105.110 | 32.625 | 15.6 | 0.00 | 0.02 | 0.02 |
| 0356 | 105.101 | 32.585 | 15.3 | 105.068 | 32.562 | 15.3 | 105.044 | 32.579 | 15.6 | 105.077 | 32.602 | 15.6 | 0.00 | 0.06 | 0.06 |

|      |         |        |      |         |        |      |         |        |      |         |        |      |      |      |      |
|------|---------|--------|------|---------|--------|------|---------|--------|------|---------|--------|------|------|------|------|
| 0357 | 105.068 | 32.562 | 15.3 | 105.035 | 32.540 | 15.3 | 105.011 | 32.557 | 15.6 | 105.044 | 32.579 | 15.6 | 0.00 | 0.09 | 0.09 |
| 0358 | 105.035 | 32.540 | 15.3 | 105.002 | 32.517 | 15.3 | 104.978 | 32.534 | 15.6 | 105.011 | 32.557 | 15.6 | 0.00 | 0.14 | 0.14 |
| 0359 | 105.002 | 32.517 | 15.3 | 104.969 | 32.494 | 15.3 | 104.945 | 32.511 | 15.6 | 104.978 | 32.534 | 15.6 | 0.00 | 0.16 | 0.16 |
| 0360 | 104.969 | 32.494 | 15.3 | 104.936 | 32.472 | 15.3 | 104.912 | 32.489 | 15.6 | 104.945 | 32.511 | 15.6 | 0.00 | 0.11 | 0.11 |
| 0361 | 104.936 | 32.472 | 15.3 | 104.903 | 32.449 | 15.3 | 104.879 | 32.466 | 15.6 | 104.912 | 32.489 | 15.6 | 0.00 | 0.01 | 0.01 |
| 0362 | 104.903 | 32.449 | 15.3 | 104.870 | 32.426 | 15.3 | 104.846 | 32.443 | 15.6 | 104.879 | 32.466 | 15.6 | 0.00 | 0.00 | 0.00 |
| 0363 | 104.870 | 32.426 | 15.3 | 104.837 | 32.404 | 15.3 | 104.812 | 32.420 | 15.6 | 104.846 | 32.443 | 15.6 | 0.00 | 0.00 | 0.00 |
| 0364 | 104.837 | 32.404 | 15.3 | 104.804 | 32.381 | 15.3 | 104.779 | 32.398 | 15.6 | 104.812 | 32.420 | 15.6 | 0.00 | 0.00 | 0.00 |
| 0365 | 104.804 | 32.381 | 15.3 | 104.771 | 32.358 | 15.3 | 104.746 | 32.375 | 15.6 | 104.779 | 32.398 | 15.6 | 0.00 | 0.15 | 0.15 |
| 0366 | 104.771 | 32.358 | 15.3 | 104.738 | 32.335 | 15.3 | 104.713 | 32.352 | 15.6 | 104.746 | 32.375 | 15.6 | 0.00 | 0.59 | 0.59 |
| 0367 | 104.721 | 32.322 | 15.3 | 104.694 | 32.297 | 15.3 | 104.672 | 32.316 | 15.6 | 104.700 | 32.342 | 15.6 | 0.00 | 0.00 | 0.00 |
| 0368 | 104.694 | 32.297 | 15.3 | 104.667 | 32.272 | 15.3 | 104.645 | 32.291 | 15.6 | 104.672 | 32.316 | 15.6 | 0.00 | 0.00 | 0.00 |
| 0369 | 104.667 | 32.272 | 15.3 | 104.639 | 32.247 | 15.3 | 104.618 | 32.267 | 15.6 | 104.645 | 32.291 | 15.6 | 0.05 | 0.00 | 0.05 |
| 0370 | 104.639 | 32.247 | 15.3 | 104.612 | 32.222 | 15.3 | 104.591 | 32.241 | 15.6 | 104.618 | 32.267 | 15.6 | 0.15 | 0.00 | 0.15 |
| 0371 | 104.612 | 32.222 | 15.3 | 104.585 | 32.197 | 15.3 | 104.563 | 32.216 | 15.6 | 104.591 | 32.241 | 15.6 | 0.24 | 1.00 | 1.03 |
| 0372 | 104.585 | 32.197 | 15.3 | 104.558 | 32.172 | 15.3 | 104.536 | 32.191 | 15.6 | 104.563 | 32.216 | 15.6 | 0.24 | 1.00 | 1.03 |
| 0373 | 104.558 | 32.172 | 15.3 | 104.530 | 32.147 | 15.3 | 104.509 | 32.166 | 15.6 | 104.536 | 32.191 | 15.6 | 0.16 | 1.13 | 1.14 |
| 0374 | 104.530 | 32.147 | 15.3 | 104.503 | 32.122 | 15.3 | 104.482 | 32.141 | 15.6 | 104.509 | 32.166 | 15.6 | 0.06 | 1.29 | 1.29 |
| 0375 | 104.503 | 32.122 | 15.3 | 104.476 | 32.097 | 15.3 | 104.454 | 32.116 | 15.6 | 104.482 | 32.141 | 15.6 | 0.00 | 1.67 | 1.67 |
| 0376 | 104.476 | 32.097 | 15.3 | 104.449 | 32.072 | 15.3 | 104.427 | 32.091 | 15.6 | 104.454 | 32.116 | 15.6 | 0.00 | 2.19 | 2.19 |
| 0377 | 104.449 | 32.072 | 15.3 | 104.421 | 32.047 | 15.3 | 104.400 | 32.066 | 15.6 | 104.427 | 32.091 | 15.6 | 0.00 | 2.19 | 2.19 |
| 0378 | 104.421 | 32.047 | 15.3 | 104.394 | 32.022 | 15.3 | 104.373 | 32.041 | 15.6 | 104.400 | 32.066 | 15.6 | 0.02 | 0.30 | 0.30 |
| 0379 | 105.709 | 33.037 | 15.6 | 105.675 | 33.014 | 15.6 | 105.651 | 33.032 | 15.9 | 105.684 | 33.054 | 15.9 | 0.00 | 0.23 | 0.23 |
| 0380 | 105.675 | 33.014 | 15.6 | 105.642 | 32.992 | 15.6 | 105.618 | 33.009 | 15.9 | 105.651 | 33.032 | 15.9 | 0.00 | 1.00 | 1.00 |
| 0381 | 105.642 | 32.992 | 15.6 | 105.609 | 32.969 | 15.6 | 105.585 | 32.986 | 15.9 | 105.618 | 33.009 | 15.9 | 0.00 | 1.00 | 1.00 |
| 0382 | 105.609 | 32.969 | 15.6 | 105.576 | 32.946 | 15.6 | 105.552 | 32.963 | 15.9 | 105.585 | 32.986 | 15.9 | 0.00 | 0.90 | 0.90 |
| 0383 | 105.576 | 32.946 | 15.6 | 105.543 | 32.924 | 15.6 | 105.519 | 32.941 | 15.9 | 105.552 | 32.963 | 15.9 | 0.00 | 0.82 | 0.82 |
| 0384 | 105.543 | 32.924 | 15.6 | 105.510 | 32.901 | 15.6 | 105.486 | 32.918 | 15.9 | 105.519 | 32.941 | 15.9 | 0.11 | 0.77 | 0.78 |
| 0385 | 105.510 | 32.901 | 15.6 | 105.477 | 32.878 | 15.6 | 105.453 | 32.895 | 15.9 | 105.486 | 32.918 | 15.9 | 0.36 | 0.72 | 0.81 |
| 0386 | 105.477 | 32.878 | 15.6 | 105.444 | 32.856 | 15.6 | 105.420 | 32.873 | 15.9 | 105.453 | 32.895 | 15.9 | 0.68 | 0.66 | 0.95 |
| 0387 | 105.444 | 32.856 | 15.6 | 105.411 | 32.833 | 15.6 | 105.387 | 32.850 | 15.9 | 105.420 | 32.873 | 15.9 | 0.93 | 0.58 | 1.10 |
| 0388 | 105.411 | 32.833 | 15.6 | 105.378 | 32.810 | 15.6 | 105.354 | 32.827 | 15.9 | 105.387 | 32.850 | 15.9 | 1.00 | 0.50 | 1.12 |
| 0389 | 105.378 | 32.810 | 15.6 | 105.345 | 32.788 | 15.6 | 105.321 | 32.804 | 15.9 | 105.354 | 32.827 | 15.9 | 0.99 | 0.45 | 1.09 |
| 0390 | 105.345 | 32.788 | 15.6 | 105.312 | 32.765 | 15.6 | 105.288 | 32.782 | 15.9 | 105.321 | 32.804 | 15.9 | 0.91 | 0.44 | 1.01 |
| 0391 | 105.312 | 32.765 | 15.6 | 105.279 | 32.742 | 15.6 | 105.255 | 32.759 | 15.9 | 105.288 | 32.782 | 15.9 | 0.88 | 0.46 | 0.99 |
| 0392 | 105.279 | 32.742 | 15.6 | 105.246 | 32.719 | 15.6 | 105.222 | 32.736 | 15.9 | 105.255 | 32.759 | 15.9 | 0.92 | 0.47 | 1.04 |
| 0393 | 105.246 | 32.719 | 15.6 | 105.213 | 32.697 | 15.6 | 105.189 | 32.714 | 15.9 | 105.222 | 32.736 | 15.9 | 0.91 | 0.46 | 1.02 |
| 0394 | 105.213 | 32.697 | 15.6 | 105.180 | 32.674 | 15.6 | 105.156 | 32.691 | 15.9 | 105.189 | 32.714 | 15.9 | 0.70 | 0.43 | 0.83 |
| 0395 | 105.180 | 32.674 | 15.6 | 105.147 | 32.651 | 15.6 | 105.123 | 32.668 | 15.9 | 105.156 | 32.691 | 15.9 | 0.33 | 0.43 | 0.54 |
| 0396 | 105.147 | 32.651 | 15.6 | 105.114 | 32.629 | 15.6 | 105.090 | 32.645 | 15.9 | 105.123 | 32.668 | 15.9 | 0.05 | 0.45 | 0.45 |
| 0397 | 105.114 | 32.629 | 15.6 | 105.081 | 32.606 | 15.6 | 105.056 | 32.623 | 15.9 | 105.090 | 32.645 | 15.9 | 0.00 | 0.49 | 0.49 |
| 0398 | 105.081 | 32.606 | 15.6 | 105.048 | 32.583 | 15.6 | 105.023 | 32.600 | 15.9 | 105.056 | 32.623 | 15.9 | 0.00 | 0.52 | 0.52 |
| 0399 | 105.048 | 32.583 | 15.6 | 105.015 | 32.560 | 15.6 | 104.990 | 32.577 | 15.9 | 105.023 | 32.600 | 15.9 | 0.00 | 0.55 | 0.55 |
| 0400 | 105.015 | 32.560 | 15.6 | 104.982 | 32.538 | 15.6 | 104.957 | 32.555 | 15.9 | 104.990 | 32.577 | 15.9 | 0.00 | 0.57 | 0.57 |
| 0401 | 104.982 | 32.538 | 15.6 | 104.949 | 32.515 | 15.6 | 104.924 | 32.532 | 15.9 | 104.957 | 32.555 | 15.9 | 0.00 | 0.55 | 0.55 |

|      |         |        |      |         |        |      |         |        |      |         |        |      |      |      |      |
|------|---------|--------|------|---------|--------|------|---------|--------|------|---------|--------|------|------|------|------|
| 0402 | 104.949 | 32.515 | 15.6 | 104.916 | 32.492 | 15.6 | 104.891 | 32.509 | 15.9 | 104.924 | 32.532 | 15.9 | 0.00 | 0.42 | 0.42 |
| 0403 | 104.916 | 32.492 | 15.6 | 104.883 | 32.470 | 15.6 | 104.859 | 32.487 | 15.9 | 104.891 | 32.509 | 15.9 | 0.00 | 0.19 | 0.19 |
| 0404 | 104.883 | 32.470 | 15.6 | 104.850 | 32.447 | 15.6 | 104.825 | 32.464 | 15.9 | 104.859 | 32.487 | 15.9 | 0.00 | 0.00 | 0.00 |
| 0405 | 104.850 | 32.447 | 15.6 | 104.817 | 32.424 | 15.6 | 104.792 | 32.441 | 15.9 | 104.825 | 32.464 | 15.9 | 0.00 | 0.00 | 0.00 |
| 0406 | 104.817 | 32.424 | 15.6 | 104.784 | 32.402 | 15.6 | 104.759 | 32.419 | 15.9 | 104.792 | 32.441 | 15.9 | 0.00 | 0.00 | 0.00 |
| 0407 | 104.784 | 32.402 | 15.6 | 104.751 | 32.379 | 15.6 | 104.726 | 32.396 | 15.9 | 104.759 | 32.419 | 15.9 | 0.00 | 0.34 | 0.34 |
| 0408 | 104.751 | 32.379 | 15.6 | 104.718 | 32.356 | 15.6 | 104.693 | 32.373 | 15.9 | 104.726 | 32.396 | 15.9 | 0.00 | 0.81 | 0.81 |
| 0409 | 104.698 | 32.340 | 15.6 | 104.671 | 32.315 | 15.6 | 104.649 | 32.335 | 15.9 | 104.676 | 32.360 | 15.9 | 0.00 | 0.00 | 0.00 |
| 0410 | 104.671 | 32.315 | 15.6 | 104.643 | 32.290 | 15.6 | 104.622 | 32.310 | 15.9 | 104.649 | 32.335 | 15.9 | 0.00 | 0.00 | 0.00 |
| 0411 | 104.643 | 32.290 | 15.6 | 104.616 | 32.265 | 15.6 | 104.595 | 32.285 | 15.9 | 104.622 | 32.310 | 15.9 | 0.00 | 0.00 | 0.00 |
| 0412 | 104.616 | 32.265 | 15.6 | 104.589 | 32.240 | 15.6 | 104.567 | 32.260 | 15.9 | 104.595 | 32.285 | 15.9 | 0.04 | 0.00 | 0.04 |
| 0413 | 104.589 | 32.240 | 15.6 | 104.562 | 32.215 | 15.6 | 104.540 | 32.235 | 15.9 | 104.567 | 32.260 | 15.9 | 0.15 | 1.00 | 1.01 |
| 0414 | 104.562 | 32.215 | 15.6 | 104.534 | 32.190 | 15.6 | 104.513 | 32.210 | 15.9 | 104.540 | 32.235 | 15.9 | 0.26 | 0.00 | 0.26 |
| 0415 | 104.534 | 32.190 | 15.6 | 104.507 | 32.165 | 15.6 | 104.486 | 32.185 | 15.9 | 104.513 | 32.210 | 15.9 | 0.28 | 0.00 | 0.28 |
| 0416 | 104.507 | 32.165 | 15.6 | 104.480 | 32.140 | 15.6 | 104.459 | 32.160 | 15.9 | 104.486 | 32.185 | 15.9 | 0.21 | 0.00 | 0.21 |
| 0417 | 104.480 | 32.140 | 15.6 | 104.453 | 32.115 | 15.6 | 104.431 | 32.135 | 15.9 | 104.459 | 32.160 | 15.9 | 0.10 | 0.11 | 0.15 |
| 0418 | 104.453 | 32.115 | 15.6 | 104.425 | 32.090 | 15.6 | 104.404 | 32.109 | 15.9 | 104.431 | 32.135 | 15.9 | 0.04 | 0.36 | 0.36 |
| 0419 | 104.425 | 32.090 | 15.6 | 104.398 | 32.065 | 15.6 | 104.377 | 32.084 | 15.9 | 104.404 | 32.109 | 15.9 | 0.03 | 0.49 | 0.49 |
| 0420 | 104.398 | 32.065 | 15.6 | 104.371 | 32.040 | 15.6 | 104.350 | 32.059 | 15.9 | 104.377 | 32.084 | 15.9 | 0.05 | 0.00 | 0.05 |
| 0421 | 105.689 | 33.058 | 15.9 | 105.656 | 33.035 | 15.9 | 105.631 | 33.052 | 16.2 | 105.664 | 33.075 | 16.2 | 0.00 | 0.00 | 0.00 |
| 0422 | 105.656 | 33.035 | 15.9 | 105.622 | 33.013 | 15.9 | 105.598 | 33.030 | 16.2 | 105.631 | 33.052 | 16.2 | 0.00 | 0.00 | 0.00 |
| 0423 | 105.622 | 33.013 | 15.9 | 105.589 | 32.990 | 15.9 | 105.565 | 33.007 | 16.2 | 105.598 | 33.030 | 16.2 | 0.00 | 0.00 | 0.00 |
| 0424 | 105.589 | 32.990 | 15.9 | 105.556 | 32.967 | 15.9 | 105.532 | 32.984 | 16.2 | 105.565 | 33.007 | 16.2 | 0.00 | 0.00 | 0.00 |
| 0425 | 105.556 | 32.967 | 15.9 | 105.523 | 32.945 | 15.9 | 105.499 | 32.962 | 16.2 | 105.532 | 32.984 | 16.2 | 0.00 | 0.00 | 0.00 |
| 0426 | 105.523 | 32.945 | 15.9 | 105.490 | 32.922 | 15.9 | 105.466 | 32.939 | 16.2 | 105.499 | 32.962 | 16.2 | 0.10 | 0.00 | 0.10 |
| 0427 | 105.490 | 32.922 | 15.9 | 105.457 | 32.899 | 15.9 | 105.433 | 32.916 | 16.2 | 105.466 | 32.939 | 16.2 | 0.33 | 0.00 | 0.33 |
| 0428 | 105.457 | 32.899 | 15.9 | 105.424 | 32.877 | 15.9 | 105.400 | 32.894 | 16.2 | 105.433 | 32.916 | 16.2 | 0.61 | 0.00 | 0.61 |
| 0429 | 105.424 | 32.877 | 15.9 | 105.391 | 32.854 | 15.9 | 105.367 | 32.871 | 16.2 | 105.400 | 32.894 | 16.2 | 0.85 | 0.00 | 0.85 |
| 0430 | 105.391 | 32.854 | 15.9 | 105.358 | 32.831 | 15.9 | 105.334 | 32.848 | 16.2 | 105.367 | 32.871 | 16.2 | 0.96 | 0.00 | 0.96 |
| 0431 | 105.358 | 32.831 | 15.9 | 105.325 | 32.808 | 15.9 | 105.301 | 32.825 | 16.2 | 105.334 | 32.848 | 16.2 | 1.00 | 0.00 | 1.00 |
| 0432 | 105.325 | 32.808 | 15.9 | 105.292 | 32.786 | 15.9 | 105.268 | 32.803 | 16.2 | 105.301 | 32.825 | 16.2 | 1.00 | 0.00 | 1.00 |
| 0433 | 105.292 | 32.786 | 15.9 | 105.259 | 32.763 | 15.9 | 105.234 | 32.780 | 16.2 | 105.268 | 32.803 | 16.2 | 1.00 | 0.00 | 1.00 |
| 0434 | 105.259 | 32.763 | 15.9 | 105.226 | 32.740 | 15.9 | 105.201 | 32.757 | 16.2 | 105.234 | 32.780 | 16.2 | 1.00 | 0.00 | 1.00 |
| 0435 | 105.226 | 32.740 | 15.9 | 105.193 | 32.718 | 15.9 | 105.168 | 32.734 | 16.2 | 105.201 | 32.757 | 16.2 | 0.92 | 0.00 | 0.92 |
| 0436 | 105.193 | 32.718 | 15.9 | 105.160 | 32.695 | 15.9 | 105.135 | 32.712 | 16.2 | 105.168 | 32.734 | 16.2 | 0.66 | 0.00 | 0.66 |
| 0437 | 105.160 | 32.695 | 15.9 | 105.127 | 32.672 | 15.9 | 105.103 | 32.689 | 16.2 | 105.135 | 32.712 | 16.2 | 0.31 | 0.00 | 0.31 |
| 0438 | 105.127 | 32.672 | 15.9 | 105.094 | 32.649 | 15.9 | 105.070 | 32.666 | 16.2 | 105.103 | 32.689 | 16.2 | 0.05 | 0.00 | 0.05 |
| 0439 | 105.094 | 32.649 | 15.9 | 105.061 | 32.627 | 15.9 | 105.036 | 32.644 | 16.2 | 105.070 | 32.666 | 16.2 | 0.00 | 0.00 | 0.00 |
| 0440 | 105.061 | 32.627 | 15.9 | 105.028 | 32.604 | 15.9 | 105.003 | 32.621 | 16.2 | 105.036 | 32.644 | 16.2 | 0.00 | 0.00 | 0.00 |
| 0441 | 105.028 | 32.604 | 15.9 | 104.995 | 32.581 | 15.9 | 104.970 | 32.598 | 16.2 | 105.003 | 32.621 | 16.2 | 0.00 | 0.00 | 0.00 |
| 0442 | 104.995 | 32.581 | 15.9 | 104.962 | 32.559 | 15.9 | 104.937 | 32.575 | 16.2 | 104.970 | 32.598 | 16.2 | 0.00 | 0.00 | 0.00 |
| 0443 | 104.962 | 32.559 | 15.9 | 104.929 | 32.536 | 15.9 | 104.904 | 32.553 | 16.2 | 104.937 | 32.575 | 16.2 | 0.00 | 0.00 | 0.00 |
| 0444 | 104.929 | 32.536 | 15.9 | 104.896 | 32.513 | 15.9 | 104.871 | 32.530 | 16.2 | 104.904 | 32.553 | 16.2 | 0.00 | 0.00 | 0.00 |
| 0445 | 104.896 | 32.513 | 15.9 | 104.863 | 32.490 | 15.9 | 104.838 | 32.507 | 16.2 | 104.871 | 32.530 | 16.2 | 0.00 | 0.37 | 0.37 |
| 0446 | 104.863 | 32.490 | 15.9 | 104.830 | 32.468 | 15.9 | 104.805 | 32.485 | 16.2 | 104.838 | 32.507 | 16.2 | 0.00 | 0.06 | 0.06 |



|      |         |        |      |         |        |      |         |        |      |         |        |      |      |      |      |
|------|---------|--------|------|---------|--------|------|---------|--------|------|---------|--------|------|------|------|------|
| 0447 | 104.830 | 32.468 | 15.9 | 104.797 | 32.445 | 15.9 | 104.772 | 32.462 | 16.2 | 104.805 | 32.485 | 16.2 | 0.00 | 0.00 | 0.00 |
| 0448 | 104.797 | 32.445 | 15.9 | 104.764 | 32.422 | 15.9 | 104.739 | 32.439 | 16.2 | 104.772 | 32.462 | 16.2 | 0.00 | 0.06 | 0.06 |
| 0449 | 104.764 | 32.422 | 15.9 | 104.731 | 32.400 | 15.9 | 104.706 | 32.416 | 16.2 | 104.739 | 32.439 | 16.2 | 0.02 | 0.50 | 0.50 |
| 0450 | 104.731 | 32.400 | 15.9 | 104.698 | 32.377 | 15.9 | 104.673 | 32.394 | 16.2 | 104.706 | 32.416 | 16.2 | 0.07 | 0.92 | 0.92 |
| 0451 | 104.675 | 32.358 | 15.9 | 104.647 | 32.333 | 15.9 | 104.626 | 32.353 | 16.2 | 104.653 | 32.378 | 16.2 | 0.02 | 0.00 | 0.02 |
| 0452 | 104.647 | 32.333 | 15.9 | 104.620 | 32.308 | 15.9 | 104.599 | 32.328 | 16.2 | 104.626 | 32.353 | 16.2 | 0.00 | 0.00 | 0.00 |
| 0453 | 104.620 | 32.308 | 15.9 | 104.593 | 32.283 | 15.9 | 104.572 | 32.303 | 16.2 | 104.599 | 32.328 | 16.2 | 0.00 | 0.00 | 0.00 |
| 0454 | 104.593 | 32.283 | 15.9 | 104.566 | 32.258 | 15.9 | 104.544 | 32.278 | 16.2 | 104.572 | 32.303 | 16.2 | 0.00 | 0.01 | 0.01 |
| 0455 | 104.566 | 32.258 | 15.9 | 104.538 | 32.233 | 15.9 | 104.517 | 32.253 | 16.2 | 104.544 | 32.278 | 16.2 | 0.06 | 1.00 | 1.00 |
| 0456 | 104.538 | 32.233 | 15.9 | 104.511 | 32.208 | 15.9 | 104.490 | 32.228 | 16.2 | 104.517 | 32.253 | 16.2 | 0.22 | 0.00 | 0.22 |
| 0457 | 104.511 | 32.208 | 15.9 | 104.484 | 32.183 | 15.9 | 104.463 | 32.203 | 16.2 | 104.490 | 32.228 | 16.2 | 0.33 | 0.00 | 0.33 |
| 0458 | 104.484 | 32.183 | 15.9 | 104.457 | 32.158 | 15.9 | 104.435 | 32.178 | 16.2 | 104.463 | 32.203 | 16.2 | 0.33 | 0.00 | 0.33 |
| 0459 | 104.457 | 32.158 | 15.9 | 104.430 | 32.133 | 15.9 | 104.408 | 32.153 | 16.2 | 104.435 | 32.178 | 16.2 | 0.24 | 0.00 | 0.24 |
| 0460 | 104.430 | 32.133 | 15.9 | 104.402 | 32.108 | 15.9 | 104.381 | 32.128 | 16.2 | 104.408 | 32.153 | 16.2 | 0.15 | 0.00 | 0.15 |
| 0461 | 104.402 | 32.108 | 15.9 | 104.375 | 32.083 | 15.9 | 104.354 | 32.103 | 16.2 | 104.381 | 32.128 | 16.2 | 0.10 | 0.06 | 0.12 |
| 0462 | 104.375 | 32.083 | 15.9 | 104.348 | 32.058 | 15.9 | 104.326 | 32.078 | 16.2 | 104.354 | 32.103 | 16.2 | 0.08 | 0.00 | 0.08 |
| 0463 | 105.668 | 33.079 | 16.2 | 105.635 | 33.056 | 16.2 | 105.611 | 33.073 | 16.5 | 105.644 | 33.096 | 16.5 | 0.00 | 0.00 | 0.00 |
| 0464 | 105.635 | 33.056 | 16.2 | 105.602 | 33.034 | 16.2 | 105.578 | 33.051 | 16.5 | 105.611 | 33.073 | 16.5 | 0.00 | 0.00 | 0.00 |
| 0465 | 105.602 | 33.034 | 16.2 | 105.569 | 33.011 | 16.2 | 105.545 | 33.028 | 16.5 | 105.578 | 33.051 | 16.5 | 0.00 | 0.00 | 0.00 |
| 0466 | 105.569 | 33.011 | 16.2 | 105.536 | 32.988 | 16.2 | 105.512 | 33.005 | 16.5 | 105.545 | 33.028 | 16.5 | 0.00 | 0.00 | 0.00 |
| 0467 | 105.536 | 32.988 | 16.2 | 105.503 | 32.965 | 16.2 | 105.479 | 32.983 | 16.5 | 105.512 | 33.005 | 16.5 | 0.00 | 0.00 | 0.00 |
| 0468 | 105.503 | 32.965 | 16.2 | 105.470 | 32.943 | 16.2 | 105.446 | 32.960 | 16.5 | 105.479 | 32.983 | 16.5 | 0.07 | 0.00 | 0.07 |
| 0469 | 105.470 | 32.943 | 16.2 | 105.437 | 32.920 | 16.2 | 105.413 | 32.937 | 16.5 | 105.446 | 32.960 | 16.5 | 0.24 | 0.00 | 0.24 |
| 0470 | 105.437 | 32.920 | 16.2 | 105.404 | 32.897 | 16.2 | 105.379 | 32.914 | 16.5 | 105.413 | 32.937 | 16.5 | 0.46 | 0.00 | 0.46 |
| 0471 | 105.404 | 32.897 | 16.2 | 105.371 | 32.875 | 16.2 | 105.347 | 32.892 | 16.5 | 105.380 | 32.914 | 16.5 | 0.65 | 0.00 | 0.65 |
| 0472 | 105.371 | 32.875 | 16.2 | 105.338 | 32.852 | 16.2 | 105.314 | 32.869 | 16.5 | 105.347 | 32.892 | 16.5 | 0.78 | 0.00 | 0.78 |
| 0473 | 105.338 | 32.852 | 16.2 | 105.305 | 32.829 | 16.2 | 105.281 | 32.846 | 16.5 | 105.314 | 32.869 | 16.5 | 0.86 | 0.00 | 0.86 |
| 0474 | 105.305 | 32.829 | 16.2 | 105.272 | 32.806 | 16.2 | 105.248 | 32.824 | 16.5 | 105.281 | 32.846 | 16.5 | 0.90 | 0.00 | 0.90 |
| 0475 | 105.272 | 32.806 | 16.2 | 105.239 | 32.784 | 16.2 | 105.214 | 32.801 | 16.5 | 105.248 | 32.824 | 16.5 | 0.91 | 0.00 | 0.91 |
| 0476 | 105.239 | 32.784 | 16.2 | 105.206 | 32.761 | 16.2 | 105.181 | 32.778 | 16.5 | 105.214 | 32.801 | 16.5 | 0.88 | 0.00 | 0.88 |
| 0477 | 105.206 | 32.761 | 16.2 | 105.173 | 32.738 | 16.2 | 105.148 | 32.755 | 16.5 | 105.181 | 32.778 | 16.5 | 0.75 | 0.00 | 0.75 |
| 0478 | 105.173 | 32.738 | 16.2 | 105.140 | 32.716 | 16.2 | 105.115 | 32.733 | 16.5 | 105.148 | 32.755 | 16.5 | 0.51 | 0.00 | 0.51 |
| 0479 | 105.140 | 32.716 | 16.2 | 105.107 | 32.693 | 16.2 | 105.082 | 32.710 | 16.5 | 105.115 | 32.733 | 16.5 | 0.22 | 0.00 | 0.22 |
| 0480 | 105.107 | 32.693 | 16.2 | 105.074 | 32.670 | 16.2 | 105.049 | 32.687 | 16.5 | 105.082 | 32.710 | 16.5 | 0.02 | 0.00 | 0.02 |
| 0481 | 105.074 | 32.670 | 16.2 | 105.041 | 32.648 | 16.2 | 105.016 | 32.664 | 16.5 | 105.049 | 32.687 | 16.5 | 0.00 | 0.00 | 0.00 |
| 0482 | 105.041 | 32.648 | 16.2 | 105.008 | 32.625 | 16.2 | 104.983 | 32.642 | 16.5 | 105.016 | 32.664 | 16.5 | 0.00 | 0.00 | 0.00 |
| 0483 | 105.008 | 32.625 | 16.2 | 104.975 | 32.602 | 16.2 | 104.950 | 32.619 | 16.5 | 104.983 | 32.642 | 16.5 | 0.00 | 0.00 | 0.00 |
| 0484 | 104.975 | 32.602 | 16.2 | 104.942 | 32.579 | 16.2 | 104.917 | 32.596 | 16.5 | 104.950 | 32.619 | 16.5 | 0.00 | 0.00 | 0.00 |
| 0485 | 104.942 | 32.579 | 16.2 | 104.909 | 32.557 | 16.2 | 104.884 | 32.574 | 16.5 | 104.917 | 32.596 | 16.5 | 0.00 | 0.00 | 0.00 |
| 0486 | 104.909 | 32.557 | 16.2 | 104.876 | 32.534 | 16.2 | 104.851 | 32.551 | 16.5 | 104.884 | 32.574 | 16.5 | 0.00 | 0.00 | 0.00 |
| 0487 | 104.876 | 32.534 | 16.2 | 104.843 | 32.511 | 16.2 | 104.818 | 32.528 | 16.5 | 104.851 | 32.551 | 16.5 | 0.00 | 0.65 | 0.65 |
| 0488 | 104.843 | 32.511 | 16.2 | 104.810 | 32.489 | 16.2 | 104.785 | 32.505 | 16.5 | 104.818 | 32.528 | 16.5 | 0.00 | 0.39 | 0.39 |
| 0489 | 104.810 | 32.489 | 16.2 | 104.777 | 32.466 | 16.2 | 104.752 | 32.483 | 16.5 | 104.785 | 32.505 | 16.5 | 0.00 | 0.26 | 0.26 |
| 0490 | 104.777 | 32.466 | 16.2 | 104.744 | 32.443 | 16.2 | 104.719 | 32.460 | 16.5 | 104.752 | 32.483 | 16.5 | 0.00 | 0.37 | 0.37 |
| 0491 | 104.744 | 32.443 | 16.2 | 104.711 | 32.420 | 16.2 | 104.686 | 32.437 | 16.5 | 104.719 | 32.460 | 16.5 | 0.08 | 0.75 | 0.76 |

|      |         |        |      |         |        |      |         |        |      |         |        |      |      |      |      |
|------|---------|--------|------|---------|--------|------|---------|--------|------|---------|--------|------|------|------|------|
| 0492 | 104.711 | 32.420 | 16.2 | 104.678 | 32.398 | 16.2 | 104.653 | 32.414 | 16.5 | 104.686 | 32.437 | 16.5 | 0.16 | 1.00 | 1.01 |
| 0493 | 104.651 | 32.377 | 16.2 | 104.624 | 32.352 | 16.2 | 104.603 | 32.371 | 16.5 | 104.630 | 32.397 | 16.5 | 0.07 | 0.00 | 0.07 |
| 0494 | 104.624 | 32.352 | 16.2 | 104.597 | 32.327 | 16.2 | 104.576 | 32.346 | 16.5 | 104.603 | 32.371 | 16.5 | 0.00 | 0.00 | 0.00 |
| 0495 | 104.597 | 32.327 | 16.2 | 104.570 | 32.302 | 16.2 | 104.548 | 32.321 | 16.5 | 104.576 | 32.346 | 16.5 | 0.00 | 0.00 | 0.00 |
| 0496 | 104.570 | 32.302 | 16.2 | 104.543 | 32.277 | 16.2 | 104.521 | 32.296 | 16.5 | 104.548 | 32.321 | 16.5 | 0.00 | 0.02 | 0.02 |
| 0497 | 104.543 | 32.277 | 16.2 | 104.515 | 32.252 | 16.2 | 104.494 | 32.271 | 16.5 | 104.521 | 32.296 | 16.5 | 0.00 | 1.00 | 1.00 |
| 0498 | 104.515 | 32.252 | 16.2 | 104.488 | 32.227 | 16.2 | 104.467 | 32.246 | 16.5 | 104.494 | 32.271 | 16.5 | 0.13 | 0.00 | 0.13 |
| 0499 | 104.488 | 32.227 | 16.2 | 104.461 | 32.202 | 16.2 | 104.439 | 32.221 | 16.5 | 104.467 | 32.246 | 16.5 | 0.28 | 0.00 | 0.28 |
| 0500 | 104.461 | 32.202 | 16.2 | 104.434 | 32.176 | 16.2 | 104.412 | 32.196 | 16.5 | 104.439 | 32.221 | 16.5 | 0.33 | 0.00 | 0.33 |
| 0501 | 104.434 | 32.176 | 16.2 | 104.406 | 32.151 | 16.2 | 104.385 | 32.171 | 16.5 | 104.412 | 32.196 | 16.5 | 0.28 | 0.00 | 0.28 |
| 0502 | 104.406 | 32.151 | 16.2 | 104.379 | 32.126 | 16.2 | 104.358 | 32.146 | 16.5 | 104.385 | 32.171 | 16.5 | 0.21 | 0.00 | 0.21 |
| 0503 | 104.379 | 32.126 | 16.2 | 104.352 | 32.101 | 16.2 | 104.330 | 32.121 | 16.5 | 104.358 | 32.146 | 16.5 | 0.15 | 0.00 | 0.15 |
| 0504 | 104.352 | 32.101 | 16.2 | 104.325 | 32.076 | 16.2 | 104.303 | 32.096 | 16.5 | 104.330 | 32.121 | 16.5 | 0.09 | 0.00 | 0.09 |
| 0505 | 105.648 | 33.100 | 16.5 | 105.615 | 33.077 | 16.5 | 105.591 | 33.094 | 16.8 | 105.624 | 33.117 | 16.8 | 0.00 | 0.00 | 0.00 |
| 0506 | 105.615 | 33.077 | 16.5 | 105.582 | 33.054 | 16.5 | 105.558 | 33.072 | 16.8 | 105.591 | 33.094 | 16.8 | 0.00 | 0.01 | 0.01 |
| 0507 | 105.582 | 33.054 | 16.5 | 105.549 | 33.032 | 16.5 | 105.525 | 33.049 | 16.8 | 105.558 | 33.072 | 16.8 | 0.00 | 0.00 | 0.00 |
| 0508 | 105.549 | 33.032 | 16.5 | 105.516 | 33.009 | 16.5 | 105.492 | 33.026 | 16.8 | 105.525 | 33.049 | 16.8 | 0.00 | 0.00 | 0.00 |
| 0509 | 105.516 | 33.009 | 16.5 | 105.483 | 32.986 | 16.5 | 105.459 | 33.003 | 16.8 | 105.492 | 33.026 | 16.8 | 0.00 | 0.00 | 0.00 |
| 0510 | 105.483 | 32.986 | 16.5 | 105.450 | 32.964 | 16.5 | 105.425 | 32.981 | 16.8 | 105.459 | 33.003 | 16.8 | 0.03 | 0.00 | 0.03 |
| 0511 | 105.450 | 32.964 | 16.5 | 105.417 | 32.941 | 16.5 | 105.392 | 32.958 | 16.8 | 105.425 | 32.981 | 16.8 | 0.12 | 0.00 | 0.12 |
| 0512 | 105.417 | 32.941 | 16.5 | 105.384 | 32.918 | 16.5 | 105.359 | 32.935 | 16.8 | 105.392 | 32.958 | 16.8 | 0.24 | 0.00 | 0.24 |
| 0513 | 105.384 | 32.918 | 16.5 | 105.351 | 32.895 | 16.5 | 105.326 | 32.913 | 16.8 | 105.359 | 32.935 | 16.8 | 0.35 | 0.00 | 0.35 |
| 0514 | 105.351 | 32.895 | 16.5 | 105.318 | 32.873 | 16.5 | 105.293 | 32.890 | 16.8 | 105.326 | 32.913 | 16.8 | 0.44 | 0.00 | 0.44 |
| 0515 | 105.318 | 32.873 | 16.5 | 105.285 | 32.850 | 16.5 | 105.260 | 32.867 | 16.8 | 105.293 | 32.890 | 16.8 | 0.50 | 0.00 | 0.50 |
| 0516 | 105.285 | 32.850 | 16.5 | 105.252 | 32.827 | 16.5 | 105.227 | 32.844 | 16.8 | 105.260 | 32.867 | 16.8 | 0.54 | 0.00 | 0.54 |
| 0517 | 105.252 | 32.827 | 16.5 | 105.219 | 32.805 | 16.5 | 105.194 | 32.822 | 16.8 | 105.227 | 32.844 | 16.8 | 0.55 | 0.00 | 0.55 |
| 0518 | 105.219 | 32.805 | 16.5 | 105.186 | 32.782 | 16.5 | 105.161 | 32.799 | 16.8 | 105.194 | 32.822 | 16.8 | 0.52 | 0.00 | 0.52 |
| 0519 | 105.186 | 32.782 | 16.5 | 105.153 | 32.759 | 16.5 | 105.128 | 32.776 | 16.8 | 105.161 | 32.799 | 16.8 | 0.43 | 0.00 | 0.43 |
| 0520 | 105.153 | 32.759 | 16.5 | 105.120 | 32.736 | 16.5 | 105.095 | 32.753 | 16.8 | 105.128 | 32.776 | 16.8 | 0.28 | 0.00 | 0.28 |
| 0521 | 105.120 | 32.736 | 16.5 | 105.087 | 32.714 | 16.5 | 105.062 | 32.731 | 16.8 | 105.095 | 32.753 | 16.8 | 0.11 | 0.00 | 0.11 |
| 0522 | 105.087 | 32.714 | 16.5 | 105.054 | 32.691 | 16.5 | 105.029 | 32.708 | 16.8 | 105.062 | 32.731 | 16.8 | 0.00 | 0.00 | 0.00 |
| 0523 | 105.054 | 32.691 | 16.5 | 105.021 | 32.668 | 16.5 | 104.996 | 32.685 | 16.8 | 105.029 | 32.708 | 16.8 | 0.00 | 0.00 | 0.00 |
| 0524 | 105.021 | 32.668 | 16.5 | 104.988 | 32.646 | 16.5 | 104.963 | 32.663 | 16.8 | 104.996 | 32.685 | 16.8 | 0.00 | 0.00 | 0.00 |
| 0525 | 104.988 | 32.646 | 16.5 | 104.955 | 32.623 | 16.5 | 104.930 | 32.640 | 16.8 | 104.963 | 32.663 | 16.8 | 0.00 | 0.00 | 0.00 |
| 0526 | 104.955 | 32.623 | 16.5 | 104.922 | 32.600 | 16.5 | 104.897 | 32.617 | 16.8 | 104.930 | 32.640 | 16.8 | 0.00 | 0.00 | 0.00 |
| 0527 | 104.922 | 32.600 | 16.5 | 104.889 | 32.577 | 16.5 | 104.864 | 32.594 | 16.8 | 104.897 | 32.617 | 16.8 | 0.00 | 0.00 | 0.00 |
| 0528 | 104.889 | 32.577 | 16.5 | 104.856 | 32.555 | 16.5 | 104.831 | 32.572 | 16.8 | 104.864 | 32.594 | 16.8 | 0.00 | 0.00 | 0.00 |
| 0529 | 104.856 | 32.555 | 16.5 | 104.823 | 32.532 | 16.5 | 104.798 | 32.549 | 16.8 | 104.831 | 32.572 | 16.8 | 0.00 | 0.89 | 0.89 |
| 0530 | 104.823 | 32.532 | 16.5 | 104.790 | 32.509 | 16.5 | 104.765 | 32.526 | 16.8 | 104.798 | 32.549 | 16.8 | 0.00 | 0.85 | 0.85 |
| 0531 | 104.790 | 32.509 | 16.5 | 104.757 | 32.487 | 16.5 | 104.732 | 32.504 | 16.8 | 104.765 | 32.526 | 16.8 | 0.00 | 0.77 | 0.77 |
| 0532 | 104.757 | 32.487 | 16.5 | 104.724 | 32.464 | 16.5 | 104.699 | 32.481 | 16.8 | 104.732 | 32.504 | 16.8 | 0.00 | 0.84 | 0.84 |
| 0533 | 104.724 | 32.464 | 16.5 | 104.691 | 32.441 | 16.5 | 104.666 | 32.458 | 16.8 | 104.699 | 32.481 | 16.8 | 0.08 | 1.00 | 1.00 |
| 0534 | 104.691 | 32.441 | 16.5 | 104.658 | 32.418 | 16.5 | 104.633 | 32.435 | 16.8 | 104.666 | 32.458 | 16.8 | 0.14 | 1.00 | 1.01 |
| 0535 | 104.628 | 32.395 | 16.5 | 104.601 | 32.370 | 16.5 | 104.580 | 32.390 | 16.8 | 104.607 | 32.415 | 16.8 | 0.07 | 0.00 | 0.07 |
| 0536 | 104.601 | 32.370 | 16.5 | 104.574 | 32.345 | 16.5 | 104.552 | 32.365 | 16.8 | 104.580 | 32.390 | 16.8 | 0.00 | 0.00 | 0.00 |

|      |         |        |      |         |        |      |         |        |      |         |        |      |       |       |       |
|------|---------|--------|------|---------|--------|------|---------|--------|------|---------|--------|------|-------|-------|-------|
| 0537 | 104.574 | 32.345 | 16.5 | 104.547 | 32.320 | 16.5 | 104.525 | 32.340 | 16.8 | 104.552 | 32.365 | 16.8 | 0.00  | 0.00  | 0.00  |
| 0538 | 104.547 | 32.320 | 16.5 | 104.519 | 32.295 | 16.5 | 104.498 | 32.315 | 16.8 | 104.525 | 32.340 | 16.8 | 0.00  | 0.09  | 0.09  |
| 0539 | 104.519 | 32.295 | 16.5 | 104.492 | 32.270 | 16.5 | 104.471 | 32.289 | 16.8 | 104.498 | 32.315 | 16.8 | 0.00  | 1.00  | 1.00  |
| 0540 | 104.492 | 32.270 | 16.5 | 104.465 | 32.245 | 16.5 | 104.443 | 32.264 | 16.8 | 104.471 | 32.289 | 16.8 | 0.05  | 0.09  | 0.10  |
| 0541 | 104.465 | 32.245 | 16.5 | 104.438 | 32.220 | 16.5 | 104.416 | 32.239 | 16.8 | 104.443 | 32.264 | 16.8 | 0.15  | 0.00  | 0.15  |
| 0542 | 104.438 | 32.220 | 16.5 | 104.410 | 32.195 | 16.5 | 104.389 | 32.214 | 16.8 | 104.416 | 32.239 | 16.8 | 0.20  | 0.00  | 0.20  |
| 0543 | 104.410 | 32.195 | 16.5 | 104.383 | 32.170 | 16.5 | 104.362 | 32.189 | 16.8 | 104.389 | 32.214 | 16.8 | 0.19  | 0.00  | 0.19  |
| 0544 | 104.383 | 32.170 | 16.5 | 104.356 | 32.145 | 16.5 | 104.334 | 32.164 | 16.8 | 104.362 | 32.189 | 16.8 | 0.16  | 0.00  | 0.16  |
| 0545 | 104.356 | 32.145 | 16.5 | 104.329 | 32.120 | 16.5 | 104.307 | 32.139 | 16.8 | 104.334 | 32.164 | 16.8 | 0.12  | 0.01  | 0.12  |
| 0546 | 104.329 | 32.120 | 16.5 | 104.302 | 32.094 | 16.5 | 104.280 | 32.114 | 16.8 | 104.307 | 32.139 | 16.8 | 0.07  | 0.01  | 0.07  |
| 0547 | 104.523 | 31.920 | 0.0  | 104.494 | 31.894 | 0.0  | 104.482 | 31.905 | 2.5  | 104.510 | 31.931 | 2.5  | 4.50  | 6.70  | 8.07  |
| 0548 | 104.494 | 31.894 | 0.0  | 104.465 | 31.868 | 0.0  | 104.453 | 31.879 | 2.5  | 104.482 | 31.905 | 2.5  | 6.14  | 8.98  | 10.88 |
| 0549 | 104.465 | 31.868 | 0.0  | 104.436 | 31.842 | 0.0  | 104.424 | 31.853 | 2.5  | 104.453 | 31.879 | 2.5  | 7.89  | 8.61  | 11.68 |
| 0550 | 104.436 | 31.842 | 0.0  | 104.407 | 31.816 | 0.0  | 104.395 | 31.828 | 2.5  | 104.424 | 31.853 | 2.5  | 9.56  | 9.04  | 13.15 |
| 0551 | 104.407 | 31.816 | 0.0  | 104.379 | 31.790 | 0.0  | 104.366 | 31.802 | 2.5  | 104.395 | 31.828 | 2.5  | 10.00 | 8.83  | 13.34 |
| 0552 | 104.379 | 31.790 | 0.0  | 104.350 | 31.765 | 0.0  | 104.337 | 31.776 | 2.5  | 104.366 | 31.802 | 2.5  | 8.57  | 7.29  | 11.25 |
| 0553 | 104.350 | 31.765 | 0.0  | 104.321 | 31.739 | 0.0  | 104.308 | 31.750 | 2.5  | 104.337 | 31.776 | 2.5  | 4.99  | 4.92  | 7.00  |
| 0554 | 104.321 | 31.739 | 0.0  | 104.292 | 31.713 | 0.0  | 104.279 | 31.724 | 2.5  | 104.308 | 31.750 | 2.5  | 0.05  | 2.20  | 2.20  |
| 0555 | 104.292 | 31.713 | 0.0  | 104.263 | 31.687 | 0.0  | 104.251 | 31.698 | 2.5  | 104.279 | 31.724 | 2.5  | 0.00  | 0.52  | 0.52  |
| 0556 | 104.263 | 31.687 | 0.0  | 104.234 | 31.661 | 0.0  | 104.222 | 31.672 | 2.5  | 104.251 | 31.698 | 2.5  | 0.53  | 0.63  | 0.82  |
| 0557 | 104.234 | 31.661 | 0.0  | 104.205 | 31.635 | 0.0  | 104.193 | 31.646 | 2.5  | 104.222 | 31.672 | 2.5  | 2.13  | 2.46  | 3.25  |
| 0558 | 104.205 | 31.635 | 0.0  | 104.176 | 31.609 | 0.0  | 104.164 | 31.620 | 2.5  | 104.193 | 31.646 | 2.5  | 3.49  | 4.67  | 5.83  |
| 0559 | 104.176 | 31.609 | 0.0  | 104.147 | 31.583 | 0.0  | 104.135 | 31.595 | 2.5  | 104.164 | 31.620 | 2.5  | 3.41  | 5.02  | 6.07  |
| 0560 | 104.147 | 31.583 | 0.0  | 104.119 | 31.557 | 0.0  | 104.106 | 31.569 | 2.5  | 104.135 | 31.595 | 2.5  | 3.29  | 5.16  | 6.11  |
| 0561 | 104.119 | 31.557 | 0.0  | 104.090 | 31.532 | 0.0  | 104.077 | 31.543 | 2.5  | 104.106 | 31.569 | 2.5  | 4.12  | 5.43  | 6.82  |
| 0562 | 104.090 | 31.532 | 0.0  | 104.061 | 31.506 | 0.0  | 104.048 | 31.517 | 2.5  | 104.077 | 31.543 | 2.5  | 5.13  | 5.42  | 7.46  |
| 0563 | 104.061 | 31.506 | 0.0  | 104.032 | 31.480 | 0.0  | 104.019 | 31.491 | 2.5  | 104.048 | 31.517 | 2.5  | 5.79  | 5.05  | 7.68  |
| 0564 | 104.032 | 31.480 | 0.0  | 104.003 | 31.454 | 0.0  | 103.990 | 31.465 | 2.5  | 104.019 | 31.491 | 2.5  | 5.75  | 4.36  | 7.22  |
| 0565 | 104.003 | 31.454 | 0.0  | 103.974 | 31.428 | 0.0  | 103.962 | 31.439 | 2.5  | 103.990 | 31.465 | 2.5  | 4.85  | 3.78  | 6.15  |
| 0566 | 103.974 | 31.428 | 0.0  | 103.945 | 31.402 | 0.0  | 103.933 | 31.413 | 2.5  | 103.962 | 31.439 | 2.5  | 3.37  | 3.03  | 4.53  |
| 0567 | 103.945 | 31.402 | 0.0  | 103.916 | 31.376 | 0.0  | 103.904 | 31.387 | 2.5  | 103.933 | 31.413 | 2.5  | 1.79  | 2.25  | 2.88  |
| 0568 | 103.916 | 31.376 | 0.0  | 103.888 | 31.350 | 0.0  | 103.875 | 31.361 | 2.5  | 103.904 | 31.387 | 2.5  | 0.60  | 1.61  | 1.72  |
| 0569 | 103.888 | 31.350 | 0.0  | 103.859 | 31.325 | 0.0  | 103.846 | 31.336 | 2.5  | 103.875 | 31.361 | 2.5  | 0.20  | 1.26  | 1.28  |
| 0570 | 103.859 | 31.325 | 0.0  | 103.830 | 31.299 | 0.0  | 103.817 | 31.310 | 2.5  | 103.846 | 31.336 | 2.5  | 0.72  | 1.36  | 1.54  |
| 0571 | 103.830 | 31.299 | 0.0  | 103.801 | 31.273 | 0.0  | 103.788 | 31.284 | 2.5  | 103.817 | 31.310 | 2.5  | 2.35  | 2.77  | 3.63  |
| 0572 | 103.801 | 31.273 | 0.0  | 103.772 | 31.247 | 0.0  | 103.760 | 31.258 | 2.5  | 103.788 | 31.284 | 2.5  | 4.87  | 4.31  | 6.51  |
| 0573 | 103.772 | 31.247 | 0.0  | 103.743 | 31.221 | 0.0  | 103.731 | 31.232 | 2.5  | 103.760 | 31.258 | 2.5  | 7.66  | 6.43  | 10.00 |
| 0574 | 103.743 | 31.221 | 0.0  | 103.714 | 31.195 | 0.0  | 103.702 | 31.206 | 2.5  | 103.731 | 31.232 | 2.5  | 9.76  | 8.61  | 13.02 |
| 0575 | 103.714 | 31.195 | 0.0  | 103.685 | 31.169 | 0.0  | 103.673 | 31.180 | 2.5  | 103.702 | 31.206 | 2.5  | 10.00 | 10.00 | 14.14 |
| 0576 | 103.685 | 31.169 | 0.0  | 103.656 | 31.143 | 0.0  | 103.644 | 31.154 | 2.5  | 103.673 | 31.180 | 2.5  | 7.78  | 10.00 | 12.67 |
| 0577 | 103.656 | 31.143 | 0.0  | 103.628 | 31.117 | 0.0  | 103.615 | 31.128 | 2.5  | 103.644 | 31.154 | 2.5  | 0.00  | 9.65  | 9.65  |
| 0578 | 103.628 | 31.117 | 0.0  | 103.599 | 31.091 | 0.0  | 103.586 | 31.103 | 2.5  | 103.615 | 31.128 | 2.5  | 0.00  | 9.46  | 9.46  |
| 0579 | 103.599 | 31.091 | 0.0  | 103.570 | 31.066 | 0.0  | 103.557 | 31.077 | 2.5  | 103.586 | 31.103 | 2.5  | 1.47  | 9.12  | 9.23  |
| 0580 | 103.570 | 31.066 | 0.0  | 103.541 | 31.040 | 0.0  | 103.528 | 31.051 | 2.5  | 103.557 | 31.077 | 2.5  | 3.73  | 8.72  | 9.49  |
| 0581 | 103.541 | 31.040 | 0.0  | 103.512 | 31.014 | 0.0  | 103.499 | 31.025 | 2.5  | 103.528 | 31.051 | 2.5  | 4.28  | 8.32  | 9.36  |

|      |         |        |     |         |        |     |         |        |     |         |        |     |      |      |       |
|------|---------|--------|-----|---------|--------|-----|---------|--------|-----|---------|--------|-----|------|------|-------|
| 0582 | 103.512 | 31.014 | 0.0 | 103.483 | 30.988 | 0.0 | 103.471 | 30.999 | 2.5 | 103.499 | 31.025 | 2.5 | 1.64 | 5.50 | 5.74  |
| 0583 | 103.483 | 30.988 | 0.0 | 103.454 | 30.962 | 0.0 | 103.442 | 30.973 | 2.5 | 103.471 | 30.999 | 2.5 | 0.00 | 5.30 | 5.30  |
| 0584 | 103.454 | 30.962 | 0.0 | 103.425 | 30.936 | 0.0 | 103.413 | 30.947 | 2.5 | 103.442 | 30.973 | 2.5 | 0.00 | 5.42 | 5.42  |
| 0585 | 103.425 | 30.936 | 0.0 | 103.397 | 30.910 | 0.0 | 103.384 | 30.921 | 2.5 | 103.413 | 30.947 | 2.5 | 0.00 | 4.72 | 4.72  |
| 0586 | 103.397 | 30.910 | 0.0 | 103.368 | 30.884 | 0.0 | 103.355 | 30.895 | 2.5 | 103.384 | 30.921 | 2.5 | 0.00 | 3.31 | 3.31  |
| 0587 | 103.368 | 30.884 | 0.0 | 103.339 | 30.858 | 0.0 | 103.326 | 30.870 | 2.5 | 103.355 | 30.895 | 2.5 | 0.00 | 1.78 | 1.78  |
| 0588 | 103.339 | 30.858 | 0.0 | 103.310 | 30.833 | 0.0 | 103.297 | 30.844 | 2.5 | 103.326 | 30.870 | 2.5 | 0.00 | 0.64 | 0.64  |
| 0589 | 103.310 | 30.833 | 0.0 | 103.281 | 30.807 | 0.0 | 103.269 | 30.818 | 2.5 | 103.297 | 30.844 | 2.5 | 0.00 | 0.11 | 0.11  |
| 0590 | 103.281 | 30.807 | 0.0 | 103.252 | 30.781 | 0.0 | 103.240 | 30.792 | 2.5 | 103.269 | 30.818 | 2.5 | 0.00 | 0.00 | 0.00  |
| 0591 | 103.252 | 30.781 | 0.0 | 103.223 | 30.755 | 0.0 | 103.211 | 30.766 | 2.5 | 103.240 | 30.792 | 2.5 | 0.00 | 0.00 | 0.00  |
| 0592 | 103.223 | 30.755 | 0.0 | 103.194 | 30.729 | 0.0 | 103.182 | 30.740 | 2.5 | 103.211 | 30.766 | 2.5 | 0.00 | 0.01 | 0.01  |
| 0593 | 103.194 | 30.729 | 0.0 | 103.165 | 30.703 | 0.0 | 103.153 | 30.714 | 2.5 | 103.182 | 30.740 | 2.5 | 0.16 | 0.26 | 0.30  |
| 0594 | 103.165 | 30.703 | 0.0 | 103.137 | 30.677 | 0.0 | 103.124 | 30.688 | 2.5 | 103.153 | 30.714 | 2.5 | 1.00 | 1.00 | 1.41  |
| 0595 | 104.510 | 31.931 | 2.5 | 104.481 | 31.905 | 2.5 | 104.468 | 31.916 | 4.8 | 104.497 | 31.942 | 4.8 | 4.13 | 5.15 | 6.60  |
| 0596 | 104.481 | 31.905 | 2.5 | 104.452 | 31.879 | 2.5 | 104.439 | 31.891 | 4.8 | 104.468 | 31.916 | 4.8 | 3.18 | 6.23 | 6.99  |
| 0597 | 104.452 | 31.879 | 2.5 | 104.423 | 31.853 | 2.5 | 104.410 | 31.865 | 4.8 | 104.439 | 31.891 | 4.8 | 4.45 | 6.51 | 7.88  |
| 0598 | 104.423 | 31.853 | 2.5 | 104.394 | 31.827 | 2.5 | 104.381 | 31.839 | 4.8 | 104.410 | 31.865 | 4.8 | 7.42 | 7.59 | 10.61 |
| 0599 | 104.394 | 31.827 | 2.5 | 104.365 | 31.801 | 2.5 | 104.352 | 31.813 | 4.8 | 104.381 | 31.839 | 4.8 | 9.20 | 7.80 | 12.06 |
| 0600 | 104.365 | 31.801 | 2.5 | 104.337 | 31.775 | 2.5 | 104.323 | 31.787 | 4.8 | 104.352 | 31.813 | 4.8 | 8.10 | 6.53 | 10.40 |
| 0601 | 104.337 | 31.775 | 2.5 | 104.308 | 31.749 | 2.5 | 104.295 | 31.761 | 4.8 | 104.323 | 31.787 | 4.8 | 4.44 | 4.37 | 6.23  |
| 0602 | 104.308 | 31.749 | 2.5 | 104.279 | 31.724 | 2.5 | 104.266 | 31.735 | 4.8 | 104.295 | 31.761 | 4.8 | 0.42 | 1.71 | 1.76  |
| 0603 | 104.279 | 31.724 | 2.5 | 104.250 | 31.698 | 2.5 | 104.237 | 31.709 | 4.8 | 104.266 | 31.735 | 4.8 | 0.00 | 0.00 | 0.00  |
| 0604 | 104.250 | 31.698 | 2.5 | 104.221 | 31.672 | 2.5 | 104.208 | 31.683 | 4.8 | 104.237 | 31.709 | 4.8 | 0.11 | 0.00 | 0.11  |
| 0605 | 104.221 | 31.672 | 2.5 | 104.192 | 31.646 | 2.5 | 104.179 | 31.658 | 4.8 | 104.208 | 31.683 | 4.8 | 1.18 | 1.72 | 2.08  |
| 0606 | 104.192 | 31.646 | 2.5 | 104.163 | 31.620 | 2.5 | 104.150 | 31.632 | 4.8 | 104.179 | 31.658 | 4.8 | 2.20 | 3.89 | 4.47  |
| 0607 | 104.163 | 31.620 | 2.5 | 104.135 | 31.594 | 2.5 | 104.121 | 31.606 | 4.8 | 104.150 | 31.632 | 4.8 | 2.40 | 4.91 | 5.47  |
| 0608 | 104.135 | 31.594 | 2.5 | 104.106 | 31.568 | 2.5 | 104.092 | 31.580 | 4.8 | 104.121 | 31.606 | 4.8 | 2.64 | 5.17 | 5.81  |
| 0609 | 104.106 | 31.568 | 2.5 | 104.077 | 31.542 | 2.5 | 104.064 | 31.554 | 4.8 | 104.092 | 31.580 | 4.8 | 3.64 | 5.23 | 6.37  |
| 0610 | 104.077 | 31.542 | 2.5 | 104.048 | 31.516 | 2.5 | 104.035 | 31.528 | 4.8 | 104.064 | 31.554 | 4.8 | 4.80 | 5.02 | 6.95  |
| 0611 | 104.048 | 31.516 | 2.5 | 104.019 | 31.491 | 2.5 | 104.006 | 31.502 | 4.8 | 104.035 | 31.528 | 4.8 | 5.55 | 4.56 | 7.18  |
| 0612 | 104.019 | 31.491 | 2.5 | 103.990 | 31.465 | 2.5 | 103.977 | 31.476 | 4.8 | 104.006 | 31.502 | 4.8 | 5.50 | 3.96 | 6.78  |
| 0613 | 103.990 | 31.465 | 2.5 | 103.961 | 31.439 | 2.5 | 103.948 | 31.450 | 4.8 | 103.977 | 31.476 | 4.8 | 4.55 | 4.11 | 6.13  |
| 0614 | 103.961 | 31.439 | 2.5 | 103.932 | 31.413 | 2.5 | 103.919 | 31.424 | 4.8 | 103.948 | 31.450 | 4.8 | 3.02 | 3.52 | 4.64  |
| 0615 | 103.932 | 31.413 | 2.5 | 103.903 | 31.387 | 2.5 | 103.890 | 31.399 | 4.8 | 103.919 | 31.424 | 4.8 | 1.44 | 2.85 | 3.19  |
| 0616 | 103.903 | 31.387 | 2.5 | 103.874 | 31.361 | 2.5 | 103.861 | 31.373 | 4.8 | 103.890 | 31.399 | 4.8 | 0.33 | 2.33 | 2.35  |
| 0617 | 103.874 | 31.361 | 2.5 | 103.846 | 31.335 | 2.5 | 103.832 | 31.347 | 4.8 | 103.861 | 31.373 | 4.8 | 0.00 | 2.05 | 2.05  |
| 0618 | 103.846 | 31.335 | 2.5 | 103.817 | 31.309 | 2.5 | 103.804 | 31.321 | 4.8 | 103.832 | 31.347 | 4.8 | 0.33 | 1.46 | 1.50  |
| 0619 | 103.817 | 31.309 | 2.5 | 103.788 | 31.283 | 2.5 | 103.775 | 31.295 | 4.8 | 103.804 | 31.321 | 4.8 | 1.70 | 0.76 | 1.87  |
| 0620 | 103.788 | 31.283 | 2.5 | 103.759 | 31.258 | 2.5 | 103.746 | 31.269 | 4.8 | 103.775 | 31.295 | 4.8 | 3.98 | 1.72 | 4.34  |
| 0621 | 103.759 | 31.258 | 2.5 | 103.730 | 31.232 | 2.5 | 103.717 | 31.243 | 4.8 | 103.746 | 31.269 | 4.8 | 6.55 | 3.79 | 7.56  |
| 0622 | 103.730 | 31.232 | 2.5 | 103.701 | 31.206 | 2.5 | 103.688 | 31.217 | 4.8 | 103.717 | 31.243 | 4.8 | 8.43 | 6.29 | 10.52 |
| 0623 | 103.701 | 31.206 | 2.5 | 103.672 | 31.180 | 2.5 | 103.659 | 31.192 | 4.8 | 103.688 | 31.217 | 4.8 | 8.52 | 8.64 | 12.13 |
| 0624 | 103.672 | 31.180 | 2.5 | 103.644 | 31.154 | 2.5 | 103.630 | 31.166 | 4.8 | 103.659 | 31.192 | 4.8 | 5.97 | 7.65 | 9.70  |
| 0625 | 103.644 | 31.154 | 2.5 | 103.615 | 31.128 | 2.5 | 103.601 | 31.140 | 4.8 | 103.630 | 31.166 | 4.8 | 0.00 | 7.43 | 7.43  |
| 0626 | 103.615 | 31.128 | 2.5 | 103.586 | 31.102 | 2.5 | 103.573 | 31.114 | 4.8 | 103.601 | 31.140 | 4.8 | 0.00 | 7.73 | 7.73  |

|      |         |        |     |         |        |     |         |        |     |         |        |     |      |      |      |
|------|---------|--------|-----|---------|--------|-----|---------|--------|-----|---------|--------|-----|------|------|------|
| 0627 | 103.586 | 31.102 | 2.5 | 103.557 | 31.076 | 2.5 | 103.544 | 31.088 | 4.8 | 103.573 | 31.114 | 4.8 | 1.34 | 7.26 | 7.39 |
| 0628 | 103.557 | 31.076 | 2.5 | 103.528 | 31.050 | 2.5 | 103.515 | 31.062 | 4.8 | 103.544 | 31.088 | 4.8 | 3.60 | 6.09 | 7.07 |
| 0629 | 103.528 | 31.050 | 2.5 | 103.499 | 31.024 | 2.5 | 103.486 | 31.036 | 4.8 | 103.515 | 31.062 | 4.8 | 4.08 | 4.33 | 5.95 |
| 0630 | 103.499 | 31.024 | 2.5 | 103.470 | 30.999 | 2.5 | 103.457 | 31.010 | 4.8 | 103.486 | 31.036 | 4.8 | 1.11 | 2.57 | 2.80 |
| 0631 | 103.470 | 30.999 | 2.5 | 103.441 | 30.973 | 2.5 | 103.428 | 30.984 | 4.8 | 103.457 | 31.010 | 4.8 | 0.00 | 3.12 | 3.12 |
| 0632 | 103.441 | 30.973 | 2.5 | 103.412 | 30.947 | 2.5 | 103.399 | 30.959 | 4.8 | 103.428 | 30.984 | 4.8 | 0.00 | 3.91 | 3.91 |
| 0633 | 103.412 | 30.947 | 2.5 | 103.383 | 30.921 | 2.5 | 103.370 | 30.933 | 4.8 | 103.399 | 30.959 | 4.8 | 0.00 | 3.65 | 3.65 |
| 0634 | 103.383 | 30.921 | 2.5 | 103.355 | 30.895 | 2.5 | 103.341 | 30.907 | 4.8 | 103.370 | 30.933 | 4.8 | 0.00 | 2.52 | 2.52 |
| 0635 | 103.355 | 30.895 | 2.5 | 103.326 | 30.869 | 2.5 | 103.313 | 30.881 | 4.8 | 103.341 | 30.907 | 4.8 | 0.00 | 1.21 | 1.21 |
| 0636 | 103.326 | 30.869 | 2.5 | 103.297 | 30.843 | 2.5 | 103.284 | 30.855 | 4.8 | 103.313 | 30.881 | 4.8 | 0.00 | 0.29 | 0.29 |
| 0637 | 103.297 | 30.843 | 2.5 | 103.268 | 30.817 | 2.5 | 103.255 | 30.829 | 4.8 | 103.284 | 30.855 | 4.8 | 0.00 | 0.00 | 0.00 |
| 0638 | 103.268 | 30.817 | 2.5 | 103.239 | 30.791 | 2.5 | 103.226 | 30.803 | 4.8 | 103.255 | 30.829 | 4.8 | 0.00 | 0.00 | 0.00 |
| 0639 | 103.239 | 30.791 | 2.5 | 103.210 | 30.766 | 2.5 | 103.197 | 30.777 | 4.8 | 103.226 | 30.803 | 4.8 | 0.00 | 0.00 | 0.00 |
| 0640 | 103.210 | 30.766 | 2.5 | 103.181 | 30.740 | 2.5 | 103.168 | 30.751 | 4.8 | 103.197 | 30.777 | 4.8 | 0.00 | 0.00 | 0.00 |
| 0641 | 103.181 | 30.740 | 2.5 | 103.153 | 30.714 | 2.5 | 103.139 | 30.726 | 4.8 | 103.168 | 30.751 | 4.8 | 0.00 | 0.00 | 0.00 |
| 0642 | 103.153 | 30.714 | 2.5 | 103.124 | 30.688 | 2.5 | 103.110 | 30.700 | 4.8 | 103.139 | 30.726 | 4.8 | 0.30 | 0.00 | 0.30 |
| 0643 | 104.496 | 31.942 | 4.9 | 104.467 | 31.916 | 4.9 | 104.454 | 31.928 | 7.2 | 104.483 | 31.954 | 7.2 | 2.20 | 1.69 | 2.77 |
| 0644 | 104.467 | 31.916 | 4.9 | 104.438 | 31.890 | 4.9 | 104.425 | 31.902 | 7.2 | 104.454 | 31.928 | 7.2 | 0.81 | 2.19 | 2.34 |
| 0645 | 104.438 | 31.890 | 4.9 | 104.410 | 31.864 | 4.9 | 104.396 | 31.876 | 7.2 | 104.425 | 31.902 | 7.2 | 1.54 | 3.09 | 3.45 |
| 0646 | 104.410 | 31.864 | 4.9 | 104.381 | 31.838 | 4.9 | 104.367 | 31.850 | 7.2 | 104.396 | 31.876 | 7.2 | 4.64 | 4.65 | 6.57 |
| 0647 | 104.381 | 31.838 | 4.9 | 104.352 | 31.812 | 4.9 | 104.338 | 31.825 | 7.2 | 104.367 | 31.850 | 7.2 | 7.06 | 5.36 | 8.86 |
| 0648 | 104.352 | 31.812 | 4.9 | 104.323 | 31.787 | 4.9 | 104.309 | 31.799 | 7.2 | 104.338 | 31.825 | 7.2 | 6.59 | 4.72 | 8.10 |
| 0649 | 104.323 | 31.787 | 4.9 | 104.294 | 31.761 | 4.9 | 104.281 | 31.773 | 7.2 | 104.309 | 31.799 | 7.2 | 3.66 | 3.30 | 4.93 |
| 0650 | 104.294 | 31.761 | 4.9 | 104.265 | 31.735 | 4.9 | 104.252 | 31.747 | 7.2 | 104.281 | 31.773 | 7.2 | 0.66 | 1.32 | 1.48 |
| 0651 | 104.265 | 31.735 | 4.9 | 104.236 | 31.709 | 4.9 | 104.223 | 31.721 | 7.2 | 104.252 | 31.747 | 7.2 | 0.00 | 0.00 | 0.00 |
| 0652 | 104.236 | 31.709 | 4.9 | 104.207 | 31.683 | 4.9 | 104.194 | 31.695 | 7.2 | 104.223 | 31.721 | 7.2 | 0.00 | 0.10 | 0.10 |
| 0653 | 104.207 | 31.683 | 4.9 | 104.178 | 31.657 | 4.9 | 104.165 | 31.669 | 7.2 | 104.194 | 31.695 | 7.2 | 0.33 | 1.45 | 1.48 |
| 0654 | 104.178 | 31.657 | 4.9 | 104.150 | 31.631 | 4.9 | 104.136 | 31.643 | 7.2 | 104.165 | 31.669 | 7.2 | 0.76 | 3.31 | 3.40 |
| 0655 | 104.150 | 31.631 | 4.9 | 104.121 | 31.605 | 4.9 | 104.107 | 31.617 | 7.2 | 104.136 | 31.643 | 7.2 | 1.03 | 5.46 | 5.55 |
| 0656 | 104.121 | 31.605 | 4.9 | 104.092 | 31.579 | 4.9 | 104.078 | 31.591 | 7.2 | 104.107 | 31.617 | 7.2 | 1.53 | 5.89 | 6.08 |
| 0657 | 104.092 | 31.579 | 4.9 | 104.063 | 31.553 | 4.9 | 104.049 | 31.566 | 7.2 | 104.078 | 31.591 | 7.2 | 2.60 | 5.71 | 6.27 |
| 0658 | 104.063 | 31.553 | 4.9 | 104.034 | 31.528 | 4.9 | 104.021 | 31.540 | 7.2 | 104.049 | 31.566 | 7.2 | 3.82 | 5.28 | 6.52 |
| 0659 | 104.034 | 31.528 | 4.9 | 104.005 | 31.502 | 4.9 | 103.992 | 31.514 | 7.2 | 104.021 | 31.540 | 7.2 | 4.62 | 4.69 | 6.58 |
| 0660 | 104.005 | 31.502 | 4.9 | 103.976 | 31.476 | 4.9 | 103.963 | 31.488 | 7.2 | 103.992 | 31.514 | 7.2 | 4.59 | 3.81 | 5.97 |
| 0661 | 103.976 | 31.476 | 4.9 | 103.948 | 31.450 | 4.9 | 103.934 | 31.462 | 7.2 | 103.963 | 31.488 | 7.2 | 3.72 | 2.12 | 4.28 |
| 0662 | 103.948 | 31.450 | 4.9 | 103.919 | 31.424 | 4.9 | 103.905 | 31.436 | 7.2 | 103.934 | 31.462 | 7.2 | 2.34 | 1.31 | 2.68 |
| 0663 | 103.919 | 31.424 | 4.9 | 103.890 | 31.398 | 4.9 | 103.876 | 31.410 | 7.2 | 103.905 | 31.436 | 7.2 | 0.99 | 0.81 | 1.28 |
| 0664 | 103.890 | 31.398 | 4.9 | 103.861 | 31.372 | 4.9 | 103.847 | 31.384 | 7.2 | 103.876 | 31.410 | 7.2 | 0.14 | 0.64 | 0.66 |
| 0665 | 103.861 | 31.372 | 4.9 | 103.832 | 31.346 | 4.9 | 103.818 | 31.358 | 7.2 | 103.847 | 31.384 | 7.2 | 0.00 | 1.29 | 1.29 |
| 0666 | 103.832 | 31.346 | 4.9 | 103.803 | 31.320 | 4.9 | 103.790 | 31.332 | 7.2 | 103.818 | 31.358 | 7.2 | 0.07 | 0.08 | 0.10 |
| 0667 | 103.803 | 31.320 | 4.9 | 103.774 | 31.295 | 4.9 | 103.761 | 31.307 | 7.2 | 103.790 | 31.332 | 7.2 | 0.87 | 0.00 | 0.87 |
| 0668 | 103.774 | 31.295 | 4.9 | 103.745 | 31.269 | 4.9 | 103.732 | 31.281 | 7.2 | 103.761 | 31.307 | 7.2 | 2.42 | 0.82 | 2.55 |
| 0669 | 103.745 | 31.269 | 4.9 | 103.716 | 31.243 | 4.9 | 103.703 | 31.255 | 7.2 | 103.732 | 31.281 | 7.2 | 4.19 | 2.80 | 5.04 |
| 0670 | 103.716 | 31.243 | 4.9 | 103.688 | 31.217 | 4.9 | 103.674 | 31.229 | 7.2 | 103.703 | 31.255 | 7.2 | 5.36 | 5.37 | 7.59 |
| 0671 | 103.688 | 31.217 | 4.9 | 103.659 | 31.191 | 4.9 | 103.645 | 31.203 | 7.2 | 103.674 | 31.229 | 7.2 | 5.14 | 7.58 | 9.16 |

|      |         |        |     |         |        |     |         |        |     |         |        |     |      |      |      |
|------|---------|--------|-----|---------|--------|-----|---------|--------|-----|---------|--------|-----|------|------|------|
| 0672 | 103.659 | 31.191 | 4.9 | 103.630 | 31.165 | 4.9 | 103.616 | 31.177 | 7.2 | 103.645 | 31.203 | 7.2 | 3.24 | 8.19 | 8.81 |
| 0673 | 103.630 | 31.165 | 4.9 | 103.601 | 31.139 | 4.9 | 103.587 | 31.151 | 7.2 | 103.616 | 31.177 | 7.2 | 0.28 | 8.00 | 8.01 |
| 0674 | 103.601 | 31.139 | 4.9 | 103.572 | 31.113 | 4.9 | 103.558 | 31.125 | 7.2 | 103.587 | 31.151 | 7.2 | 0.00 | 7.23 | 7.23 |
| 0675 | 103.572 | 31.113 | 4.9 | 103.543 | 31.087 | 4.9 | 103.530 | 31.099 | 7.2 | 103.558 | 31.125 | 7.2 | 0.82 | 5.72 | 5.78 |
| 0676 | 103.543 | 31.087 | 4.9 | 103.514 | 31.062 | 4.9 | 103.501 | 31.073 | 7.2 | 103.530 | 31.099 | 7.2 | 2.20 | 3.58 | 4.20 |
| 0677 | 103.514 | 31.062 | 4.9 | 103.485 | 31.036 | 4.9 | 103.472 | 31.048 | 7.2 | 103.501 | 31.073 | 7.2 | 2.35 | 1.22 | 2.65 |
| 0678 | 103.485 | 31.036 | 4.9 | 103.457 | 31.010 | 4.9 | 103.443 | 31.022 | 7.2 | 103.472 | 31.048 | 7.2 | 0.51 | 0.00 | 0.51 |
| 0679 | 103.457 | 31.010 | 4.9 | 103.428 | 30.984 | 4.9 | 103.414 | 30.996 | 7.2 | 103.443 | 31.022 | 7.2 | 0.00 | 0.84 | 0.84 |
| 0680 | 103.428 | 30.984 | 4.9 | 103.399 | 30.958 | 4.9 | 103.385 | 30.970 | 7.2 | 103.414 | 30.996 | 7.2 | 0.00 | 1.97 | 1.97 |
| 0681 | 103.399 | 30.958 | 4.9 | 103.370 | 30.932 | 4.9 | 103.356 | 30.944 | 7.2 | 103.385 | 30.970 | 7.2 | 0.00 | 2.21 | 2.21 |
| 0682 | 103.370 | 30.932 | 4.9 | 103.341 | 30.906 | 4.9 | 103.328 | 30.918 | 7.2 | 103.356 | 30.944 | 7.2 | 0.00 | 1.62 | 1.62 |
| 0683 | 103.341 | 30.906 | 4.9 | 103.312 | 30.880 | 4.9 | 103.299 | 30.892 | 7.2 | 103.328 | 30.918 | 7.2 | 0.00 | 0.79 | 0.79 |
| 0684 | 103.312 | 30.880 | 4.9 | 103.283 | 30.855 | 4.9 | 103.270 | 30.866 | 7.2 | 103.299 | 30.892 | 7.2 | 0.00 | 0.19 | 0.19 |
| 0685 | 103.283 | 30.855 | 4.9 | 103.254 | 30.829 | 4.9 | 103.241 | 30.840 | 7.2 | 103.270 | 30.866 | 7.2 | 0.00 | 0.00 | 0.00 |
| 0686 | 103.254 | 30.829 | 4.9 | 103.225 | 30.803 | 4.9 | 103.212 | 30.815 | 7.2 | 103.241 | 30.840 | 7.2 | 0.00 | 0.00 | 0.00 |
| 0687 | 103.225 | 30.803 | 4.9 | 103.197 | 30.777 | 4.9 | 103.183 | 30.789 | 7.2 | 103.212 | 30.815 | 7.2 | 0.00 | 0.00 | 0.00 |
| 0688 | 103.197 | 30.777 | 4.9 | 103.168 | 30.751 | 4.9 | 103.154 | 30.763 | 7.2 | 103.183 | 30.789 | 7.2 | 0.00 | 0.00 | 0.00 |
| 0689 | 103.168 | 30.751 | 4.9 | 103.139 | 30.725 | 4.9 | 103.125 | 30.737 | 7.2 | 103.154 | 30.763 | 7.2 | 0.00 | 0.00 | 0.00 |
| 0690 | 103.139 | 30.725 | 4.9 | 103.110 | 30.699 | 4.9 | 103.096 | 30.711 | 7.2 | 103.125 | 30.737 | 7.2 | 0.00 | 0.00 | 0.00 |
| 0691 | 104.482 | 31.953 | 7.2 | 104.453 | 31.928 | 7.2 | 104.439 | 31.940 | 9.6 | 104.468 | 31.966 | 9.6 | 0.87 | 0.21 | 0.90 |
| 0692 | 104.453 | 31.928 | 7.2 | 104.424 | 31.902 | 7.2 | 104.411 | 31.914 | 9.6 | 104.439 | 31.940 | 9.6 | 0.06 | 0.75 | 0.75 |
| 0693 | 104.424 | 31.902 | 7.2 | 104.395 | 31.876 | 7.2 | 104.382 | 31.888 | 9.6 | 104.411 | 31.914 | 9.6 | 0.46 | 1.42 | 1.49 |
| 0694 | 104.395 | 31.876 | 7.2 | 104.367 | 31.850 | 7.2 | 104.353 | 31.862 | 9.6 | 104.382 | 31.888 | 9.6 | 2.77 | 2.63 | 3.82 |
| 0695 | 104.367 | 31.850 | 7.2 | 104.338 | 31.824 | 7.2 | 104.324 | 31.836 | 9.6 | 104.353 | 31.862 | 9.6 | 4.85 | 3.35 | 5.90 |
| 0696 | 104.338 | 31.824 | 7.2 | 104.309 | 31.798 | 7.2 | 104.295 | 31.810 | 9.6 | 104.324 | 31.836 | 9.6 | 4.73 | 3.25 | 5.74 |
| 0697 | 104.309 | 31.798 | 7.2 | 104.280 | 31.772 | 7.2 | 104.266 | 31.785 | 9.6 | 104.295 | 31.810 | 9.6 | 2.62 | 3.43 | 4.31 |
| 0698 | 104.280 | 31.772 | 7.2 | 104.251 | 31.746 | 7.2 | 104.237 | 31.759 | 9.6 | 104.266 | 31.785 | 9.6 | 0.49 | 2.37 | 2.42 |
| 0699 | 104.251 | 31.746 | 7.2 | 104.222 | 31.720 | 7.2 | 104.209 | 31.733 | 9.6 | 104.237 | 31.759 | 9.6 | 0.00 | 1.44 | 1.44 |
| 0700 | 104.222 | 31.720 | 7.2 | 104.193 | 31.695 | 7.2 | 104.180 | 31.707 | 9.6 | 104.209 | 31.733 | 9.6 | 0.00 | 1.59 | 1.59 |
| 0701 | 104.193 | 31.695 | 7.2 | 104.165 | 31.669 | 7.2 | 104.151 | 31.681 | 9.6 | 104.180 | 31.707 | 9.6 | 0.00 | 2.43 | 2.43 |
| 0702 | 104.165 | 31.669 | 7.2 | 104.136 | 31.643 | 7.2 | 104.122 | 31.655 | 9.6 | 104.151 | 31.681 | 9.6 | 0.04 | 3.47 | 3.47 |
| 0703 | 104.136 | 31.643 | 7.2 | 104.107 | 31.617 | 7.2 | 104.093 | 31.629 | 9.6 | 104.122 | 31.655 | 9.6 | 0.15 | 4.46 | 4.47 |
| 0704 | 104.107 | 31.617 | 7.2 | 104.078 | 31.591 | 7.2 | 104.064 | 31.603 | 9.6 | 104.093 | 31.629 | 9.6 | 0.55 | 4.50 | 4.53 |
| 0705 | 104.078 | 31.591 | 7.2 | 104.049 | 31.565 | 7.2 | 104.035 | 31.577 | 9.6 | 104.064 | 31.603 | 9.6 | 1.51 | 4.07 | 4.35 |
| 0706 | 104.049 | 31.565 | 7.2 | 104.020 | 31.539 | 7.2 | 104.006 | 31.551 | 9.6 | 104.035 | 31.577 | 9.6 | 2.68 | 3.57 | 4.47 |
| 0707 | 104.020 | 31.539 | 7.2 | 103.991 | 31.513 | 7.2 | 103.977 | 31.526 | 9.6 | 104.006 | 31.551 | 9.6 | 3.48 | 3.11 | 4.66 |
| 0708 | 103.991 | 31.513 | 7.2 | 103.962 | 31.487 | 7.2 | 103.948 | 31.500 | 9.6 | 103.977 | 31.526 | 9.6 | 3.51 | 2.59 | 4.36 |
| 0709 | 103.962 | 31.487 | 7.2 | 103.933 | 31.462 | 7.2 | 103.920 | 31.474 | 9.6 | 103.948 | 31.500 | 9.6 | 2.79 | 1.94 | 3.40 |
| 0710 | 103.933 | 31.462 | 7.2 | 103.904 | 31.436 | 7.2 | 103.891 | 31.448 | 9.6 | 103.920 | 31.474 | 9.6 | 1.66 | 1.53 | 2.25 |
| 0711 | 103.904 | 31.436 | 7.2 | 103.876 | 31.410 | 7.2 | 103.862 | 31.422 | 9.6 | 103.891 | 31.448 | 9.6 | 0.60 | 1.26 | 1.40 |
| 0712 | 103.876 | 31.410 | 7.2 | 103.847 | 31.384 | 7.2 | 103.833 | 31.396 | 9.6 | 103.862 | 31.422 | 9.6 | 0.02 | 1.11 | 1.11 |
| 0713 | 103.847 | 31.384 | 7.2 | 103.818 | 31.358 | 7.2 | 103.804 | 31.370 | 9.6 | 103.833 | 31.396 | 9.6 | 0.00 | 1.09 | 1.09 |
| 0714 | 103.818 | 31.358 | 7.2 | 103.789 | 31.332 | 7.2 | 103.775 | 31.344 | 9.6 | 103.804 | 31.370 | 9.6 | 0.00 | 0.78 | 0.78 |
| 0715 | 103.789 | 31.332 | 7.2 | 103.760 | 31.306 | 7.2 | 103.746 | 31.318 | 9.6 | 103.775 | 31.344 | 9.6 | 0.25 | 0.98 | 1.01 |
| 0716 | 103.760 | 31.306 | 7.2 | 103.731 | 31.280 | 7.2 | 103.718 | 31.292 | 9.6 | 103.746 | 31.318 | 9.6 | 1.00 | 1.94 | 2.18 |

|      |         |        |     |         |        |     |         |        |      |         |        |      |      |       |       |
|------|---------|--------|-----|---------|--------|-----|---------|--------|------|---------|--------|------|------|-------|-------|
| 0717 | 103.731 | 31.280 | 7.2 | 103.702 | 31.254 | 7.2 | 103.689 | 31.267 | 9.6  | 103.718 | 31.292 | 9.6  | 1.95 | 3.91  | 4.37  |
| 0718 | 103.702 | 31.254 | 7.2 | 103.674 | 31.228 | 7.2 | 103.660 | 31.241 | 9.6  | 103.689 | 31.267 | 9.6  | 2.54 | 6.51  | 6.99  |
| 0719 | 103.674 | 31.228 | 7.2 | 103.645 | 31.203 | 7.2 | 103.631 | 31.215 | 9.6  | 103.660 | 31.241 | 9.6  | 2.32 | 8.87  | 9.17  |
| 0720 | 103.645 | 31.203 | 7.2 | 103.616 | 31.177 | 7.2 | 103.602 | 31.189 | 9.6  | 103.631 | 31.215 | 9.6  | 1.31 | 10.00 | 10.09 |
| 0721 | 103.616 | 31.177 | 7.2 | 103.587 | 31.151 | 7.2 | 103.573 | 31.163 | 9.6  | 103.602 | 31.189 | 9.6  | 0.13 | 10.00 | 10.00 |
| 0722 | 103.587 | 31.151 | 7.2 | 103.558 | 31.125 | 7.2 | 103.544 | 31.137 | 9.6  | 103.573 | 31.163 | 9.6  | 0.00 | 8.69  | 8.69  |
| 0723 | 103.558 | 31.125 | 7.2 | 103.529 | 31.099 | 7.2 | 103.515 | 31.111 | 9.6  | 103.544 | 31.137 | 9.6  | 0.25 | 6.55  | 6.55  |
| 0724 | 103.529 | 31.099 | 7.2 | 103.500 | 31.073 | 7.2 | 103.486 | 31.085 | 9.6  | 103.515 | 31.111 | 9.6  | 0.76 | 4.08  | 4.15  |
| 0725 | 103.500 | 31.073 | 7.2 | 103.471 | 31.047 | 7.2 | 103.457 | 31.059 | 9.6  | 103.486 | 31.085 | 9.6  | 0.75 | 1.87  | 2.02  |
| 0726 | 103.471 | 31.047 | 7.2 | 103.442 | 31.021 | 7.2 | 103.429 | 31.034 | 9.6  | 103.457 | 31.059 | 9.6  | 0.06 | 0.88  | 0.88  |
| 0727 | 103.442 | 31.021 | 7.2 | 103.414 | 30.995 | 7.2 | 103.400 | 31.008 | 9.6  | 103.429 | 31.033 | 9.6  | 0.00 | 1.36  | 1.36  |
| 0728 | 103.414 | 30.995 | 7.2 | 103.385 | 30.970 | 7.2 | 103.371 | 30.982 | 9.6  | 103.400 | 31.008 | 9.6  | 0.00 | 2.19  | 2.19  |
| 0729 | 103.385 | 30.970 | 7.2 | 103.356 | 30.944 | 7.2 | 103.342 | 30.956 | 9.6  | 103.371 | 30.982 | 9.6  | 0.00 | 2.52  | 2.52  |
| 0730 | 103.356 | 30.944 | 7.2 | 103.327 | 30.918 | 7.2 | 103.313 | 30.930 | 9.6  | 103.342 | 30.956 | 9.6  | 0.06 | 2.34  | 2.34  |
| 0731 | 103.327 | 30.918 | 7.2 | 103.298 | 30.892 | 7.2 | 103.284 | 30.904 | 9.6  | 103.313 | 30.930 | 9.6  | 0.08 | 1.96  | 1.96  |
| 0732 | 103.298 | 30.892 | 7.2 | 103.269 | 30.866 | 7.2 | 103.255 | 30.878 | 9.6  | 103.284 | 30.904 | 9.6  | 0.01 | 1.64  | 1.64  |
| 0733 | 103.269 | 30.866 | 7.2 | 103.240 | 30.840 | 7.2 | 103.227 | 30.852 | 9.6  | 103.255 | 30.878 | 9.6  | 0.00 | 1.41  | 1.41  |
| 0734 | 103.240 | 30.840 | 7.2 | 103.211 | 30.814 | 7.2 | 103.198 | 30.826 | 9.6  | 103.227 | 30.852 | 9.6  | 0.00 | 1.19  | 1.19  |
| 0735 | 103.211 | 30.814 | 7.2 | 103.183 | 30.788 | 7.2 | 103.169 | 30.800 | 9.6  | 103.198 | 30.826 | 9.6  | 0.00 | 1.00  | 1.00  |
| 0736 | 103.183 | 30.788 | 7.2 | 103.154 | 30.762 | 7.2 | 103.140 | 30.774 | 9.6  | 103.169 | 30.800 | 9.6  | 0.00 | 1.00  | 1.00  |
| 0737 | 103.154 | 30.762 | 7.2 | 103.125 | 30.736 | 7.2 | 103.111 | 30.749 | 9.6  | 103.140 | 30.774 | 9.6  | 0.00 | 1.00  | 1.00  |
| 0738 | 103.125 | 30.736 | 7.2 | 103.096 | 30.710 | 7.2 | 103.082 | 30.723 | 9.6  | 103.111 | 30.749 | 9.6  | 0.00 | 0.16  | 0.16  |
| 0739 | 104.468 | 31.965 | 9.6 | 104.439 | 31.939 | 9.6 | 104.424 | 31.953 | 11.8 | 104.453 | 31.978 | 11.8 | 0.35 | 0.31  | 0.47  |
| 0740 | 104.439 | 31.939 | 9.6 | 104.410 | 31.913 | 9.6 | 104.395 | 31.927 | 11.8 | 104.424 | 31.953 | 11.8 | 0.00 | 1.77  | 1.77  |
| 0741 | 104.410 | 31.913 | 9.6 | 104.381 | 31.888 | 9.6 | 104.367 | 31.901 | 11.8 | 104.395 | 31.927 | 11.8 | 0.16 | 2.07  | 2.08  |
| 0742 | 104.381 | 31.888 | 9.6 | 104.352 | 31.862 | 9.6 | 104.338 | 31.875 | 11.8 | 104.367 | 31.901 | 11.8 | 1.48 | 2.58  | 2.97  |
| 0743 | 104.352 | 31.862 | 9.6 | 104.323 | 31.836 | 9.6 | 104.309 | 31.849 | 11.8 | 104.338 | 31.875 | 11.8 | 2.84 | 2.92  | 4.08  |
| 0744 | 104.323 | 31.836 | 9.6 | 104.294 | 31.810 | 9.6 | 104.280 | 31.823 | 11.8 | 104.309 | 31.849 | 11.8 | 2.82 | 2.82  | 3.99  |
| 0745 | 104.294 | 31.810 | 9.6 | 104.266 | 31.784 | 9.6 | 104.251 | 31.797 | 11.8 | 104.280 | 31.823 | 11.8 | 1.46 | 2.54  | 2.93  |
| 0746 | 104.266 | 31.784 | 9.6 | 104.237 | 31.758 | 9.6 | 104.222 | 31.771 | 11.8 | 104.251 | 31.797 | 11.8 | 0.17 | 1.81  | 1.82  |
| 0747 | 104.237 | 31.758 | 9.6 | 104.208 | 31.732 | 9.6 | 104.193 | 31.745 | 11.8 | 104.222 | 31.771 | 11.8 | 0.00 | 0.23  | 0.23  |
| 0748 | 104.208 | 31.732 | 9.6 | 104.179 | 31.706 | 9.6 | 104.164 | 31.719 | 11.8 | 104.193 | 31.745 | 11.8 | 0.00 | 0.20  | 0.20  |
| 0749 | 104.179 | 31.706 | 9.6 | 104.150 | 31.680 | 9.6 | 104.135 | 31.694 | 11.8 | 104.164 | 31.719 | 11.8 | 0.00 | 0.56  | 0.56  |
| 0750 | 104.150 | 31.680 | 9.6 | 104.121 | 31.654 | 9.6 | 104.107 | 31.668 | 11.8 | 104.135 | 31.694 | 11.8 | 0.00 | 1.07  | 1.07  |
| 0751 | 104.121 | 31.654 | 9.6 | 104.092 | 31.629 | 9.6 | 104.078 | 31.642 | 11.8 | 104.107 | 31.668 | 11.8 | 0.00 | 2.43  | 2.43  |
| 0752 | 104.092 | 31.629 | 9.6 | 104.064 | 31.603 | 9.6 | 104.049 | 31.616 | 11.8 | 104.078 | 31.642 | 11.8 | 0.09 | 2.31  | 2.31  |
| 0753 | 104.064 | 31.603 | 9.6 | 104.035 | 31.577 | 9.6 | 104.020 | 31.590 | 11.8 | 104.049 | 31.616 | 11.8 | 0.77 | 1.84  | 1.99  |
| 0754 | 104.035 | 31.577 | 9.6 | 104.006 | 31.551 | 9.6 | 103.991 | 31.564 | 11.8 | 104.020 | 31.590 | 11.8 | 1.77 | 1.44  | 2.28  |
| 0755 | 104.006 | 31.551 | 9.6 | 103.977 | 31.525 | 9.6 | 103.962 | 31.538 | 11.8 | 103.991 | 31.564 | 11.8 | 2.52 | 1.20  | 2.79  |
| 0756 | 103.977 | 31.525 | 9.6 | 103.948 | 31.499 | 9.6 | 103.933 | 31.512 | 11.8 | 103.962 | 31.538 | 11.8 | 2.63 | 1.03  | 2.83  |
| 0757 | 103.948 | 31.499 | 9.6 | 103.919 | 31.473 | 9.6 | 103.904 | 31.486 | 11.8 | 103.933 | 31.512 | 11.8 | 2.10 | 0.88  | 2.28  |
| 0758 | 103.919 | 31.473 | 9.6 | 103.890 | 31.447 | 9.6 | 103.876 | 31.460 | 11.8 | 103.904 | 31.486 | 11.8 | 1.23 | 0.80  | 1.47  |
| 0759 | 103.890 | 31.447 | 9.6 | 103.861 | 31.421 | 9.6 | 103.847 | 31.434 | 11.8 | 103.876 | 31.460 | 11.8 | 0.42 | 0.74  | 0.85  |
| 0760 | 103.861 | 31.421 | 9.6 | 103.832 | 31.396 | 9.6 | 103.818 | 31.409 | 11.8 | 103.847 | 31.434 | 11.8 | 0.00 | 0.65  | 0.65  |
| 0761 | 103.832 | 31.396 | 9.6 | 103.804 | 31.370 | 9.6 | 103.789 | 31.383 | 11.8 | 103.818 | 31.409 | 11.8 | 0.00 | 0.56  | 0.56  |

|      |         |        |      |         |        |      |         |        |      |         |        |      |      |      |      |
|------|---------|--------|------|---------|--------|------|---------|--------|------|---------|--------|------|------|------|------|
| 0762 | 103.804 | 31.370 | 9.6  | 103.775 | 31.344 | 9.6  | 103.760 | 31.357 | 11.8 | 103.789 | 31.383 | 11.8 | 0.00 | 0.46 | 0.46 |
| 0763 | 103.775 | 31.344 | 9.6  | 103.746 | 31.318 | 9.6  | 103.731 | 31.331 | 11.8 | 103.760 | 31.357 | 11.8 | 0.00 | 0.70 | 0.70 |
| 0764 | 103.746 | 31.318 | 9.6  | 103.717 | 31.292 | 9.6  | 103.702 | 31.305 | 11.8 | 103.731 | 31.331 | 11.8 | 0.19 | 1.58 | 1.59 |
| 0765 | 103.717 | 31.292 | 9.6  | 103.688 | 31.266 | 9.6  | 103.673 | 31.279 | 11.8 | 103.702 | 31.305 | 11.8 | 0.53 | 3.36 | 3.40 |
| 0766 | 103.688 | 31.266 | 9.6  | 103.659 | 31.240 | 9.6  | 103.644 | 31.253 | 11.8 | 103.673 | 31.279 | 11.8 | 0.76 | 5.82 | 5.87 |
| 0767 | 103.659 | 31.240 | 9.6  | 103.630 | 31.214 | 9.6  | 103.616 | 31.227 | 11.8 | 103.644 | 31.253 | 11.8 | 0.65 | 8.22 | 8.25 |
| 0768 | 103.630 | 31.214 | 9.6  | 103.601 | 31.188 | 9.6  | 103.587 | 31.201 | 11.8 | 103.616 | 31.227 | 11.8 | 0.30 | 9.63 | 9.63 |
| 0769 | 103.601 | 31.188 | 9.6  | 103.573 | 31.163 | 9.6  | 103.558 | 31.175 | 11.8 | 103.587 | 31.201 | 11.8 | 0.00 | 9.64 | 9.64 |
| 0770 | 103.573 | 31.163 | 9.6  | 103.544 | 31.137 | 9.6  | 103.529 | 31.149 | 11.8 | 103.558 | 31.175 | 11.8 | 0.00 | 8.23 | 8.23 |
| 0771 | 103.544 | 31.137 | 9.6  | 103.515 | 31.111 | 9.6  | 103.500 | 31.124 | 11.8 | 103.529 | 31.149 | 11.8 | 0.00 | 6.04 | 6.04 |
| 0772 | 103.515 | 31.111 | 9.6  | 103.486 | 31.085 | 9.6  | 103.471 | 31.098 | 11.8 | 103.500 | 31.124 | 11.8 | 0.04 | 3.74 | 3.75 |
| 0773 | 103.486 | 31.085 | 9.6  | 103.457 | 31.059 | 9.6  | 103.442 | 31.072 | 11.8 | 103.471 | 31.098 | 11.8 | 0.04 | 1.92 | 1.92 |
| 0774 | 103.457 | 31.059 | 9.6  | 103.428 | 31.033 | 9.6  | 103.413 | 31.046 | 11.8 | 103.442 | 31.072 | 11.8 | 0.00 | 1.03 | 1.03 |
| 0775 | 103.428 | 31.033 | 9.6  | 103.399 | 31.007 | 9.6  | 103.385 | 31.020 | 11.8 | 103.413 | 31.046 | 11.8 | 0.00 | 1.07 | 1.07 |
| 0776 | 103.399 | 31.007 | 9.6  | 103.370 | 30.981 | 9.6  | 103.356 | 30.994 | 11.8 | 103.385 | 31.020 | 11.8 | 0.00 | 1.44 | 1.44 |
| 0777 | 103.370 | 30.981 | 9.6  | 103.341 | 30.955 | 9.6  | 103.327 | 30.968 | 11.8 | 103.356 | 30.994 | 11.8 | 0.12 | 1.67 | 1.67 |
| 0778 | 103.341 | 30.955 | 9.6  | 103.313 | 30.929 | 9.6  | 103.298 | 30.942 | 11.8 | 103.327 | 30.968 | 11.8 | 0.34 | 1.75 | 1.79 |
| 0779 | 103.313 | 30.929 | 9.6  | 103.284 | 30.904 | 9.6  | 103.269 | 30.916 | 11.8 | 103.298 | 30.942 | 11.8 | 0.38 | 1.82 | 1.86 |
| 0780 | 103.284 | 30.904 | 9.6  | 103.255 | 30.878 | 9.6  | 103.240 | 30.890 | 11.8 | 103.269 | 30.916 | 11.8 | 0.15 | 1.84 | 1.84 |
| 0781 | 103.255 | 30.878 | 9.6  | 103.226 | 30.852 | 9.6  | 103.211 | 30.865 | 11.8 | 103.240 | 30.890 | 11.8 | 0.00 | 1.66 | 1.66 |
| 0782 | 103.226 | 30.852 | 9.6  | 103.197 | 30.826 | 9.6  | 103.182 | 30.839 | 11.8 | 103.211 | 30.865 | 11.8 | 0.00 | 1.27 | 1.27 |
| 0783 | 103.197 | 30.826 | 9.6  | 103.168 | 30.800 | 9.6  | 103.153 | 30.813 | 11.8 | 103.182 | 30.839 | 11.8 | 0.00 | 0.92 | 0.92 |
| 0784 | 103.168 | 30.800 | 9.6  | 103.139 | 30.774 | 9.6  | 103.125 | 30.787 | 11.8 | 103.153 | 30.813 | 11.8 | 0.00 | 0.91 | 0.91 |
| 0785 | 103.139 | 30.774 | 9.6  | 103.110 | 30.748 | 9.6  | 103.096 | 30.761 | 11.8 | 103.125 | 30.787 | 11.8 | 0.00 | 1.00 | 1.00 |
| 0786 | 103.110 | 30.748 | 9.6  | 103.082 | 30.722 | 9.6  | 103.067 | 30.735 | 11.8 | 103.096 | 30.761 | 11.8 | 0.00 | 0.00 | 0.00 |
| 0787 | 104.453 | 31.978 | 11.8 | 104.424 | 31.952 | 11.8 | 104.406 | 31.968 | 13.5 | 104.435 | 31.994 | 13.5 | 0.16 | 0.00 | 0.16 |
| 0788 | 104.424 | 31.952 | 11.8 | 104.395 | 31.926 | 11.8 | 104.377 | 31.942 | 13.5 | 104.406 | 31.968 | 13.5 | 0.00 | 1.49 | 1.49 |
| 0789 | 104.395 | 31.926 | 11.8 | 104.366 | 31.900 | 11.8 | 104.348 | 31.916 | 13.5 | 104.377 | 31.942 | 13.5 | 0.00 | 1.27 | 1.27 |
| 0790 | 104.366 | 31.900 | 11.8 | 104.337 | 31.874 | 11.8 | 104.319 | 31.890 | 13.5 | 104.348 | 31.916 | 13.5 | 0.52 | 1.13 | 1.24 |
| 0791 | 104.337 | 31.874 | 11.8 | 104.308 | 31.848 | 11.8 | 104.290 | 31.864 | 13.5 | 104.319 | 31.890 | 13.5 | 1.20 | 1.20 | 1.69 |
| 0792 | 104.308 | 31.848 | 11.8 | 104.279 | 31.823 | 11.8 | 104.261 | 31.838 | 13.5 | 104.290 | 31.864 | 13.5 | 1.21 | 1.23 | 1.73 |
| 0793 | 104.279 | 31.823 | 11.8 | 104.250 | 31.797 | 11.8 | 104.233 | 31.812 | 13.5 | 104.261 | 31.838 | 13.5 | 0.53 | 1.27 | 1.37 |
| 0794 | 104.250 | 31.797 | 11.8 | 104.222 | 31.771 | 11.8 | 104.204 | 31.787 | 13.5 | 104.233 | 31.812 | 13.5 | 0.00 | 1.16 | 1.16 |
| 0795 | 104.222 | 31.771 | 11.8 | 104.193 | 31.745 | 11.8 | 104.175 | 31.761 | 13.5 | 104.204 | 31.787 | 13.5 | 0.00 | 0.00 | 0.00 |
| 0796 | 104.193 | 31.745 | 11.8 | 104.164 | 31.719 | 11.8 | 104.146 | 31.735 | 13.5 | 104.175 | 31.761 | 13.5 | 0.00 | 0.00 | 0.00 |
| 0797 | 104.164 | 31.719 | 11.8 | 104.135 | 31.693 | 11.8 | 104.117 | 31.709 | 13.5 | 104.146 | 31.735 | 13.5 | 0.00 | 0.00 | 0.00 |
| 0798 | 104.135 | 31.693 | 11.8 | 104.106 | 31.667 | 11.8 | 104.088 | 31.683 | 13.5 | 104.117 | 31.709 | 13.5 | 0.00 | 0.00 | 0.00 |
| 0799 | 104.106 | 31.667 | 11.8 | 104.077 | 31.641 | 11.8 | 104.059 | 31.657 | 13.5 | 104.088 | 31.683 | 13.5 | 0.00 | 0.86 | 0.86 |
| 0800 | 104.077 | 31.641 | 11.8 | 104.048 | 31.615 | 11.8 | 104.030 | 31.631 | 13.5 | 104.059 | 31.657 | 13.5 | 0.00 | 0.54 | 0.54 |
| 0801 | 104.048 | 31.615 | 11.8 | 104.019 | 31.589 | 11.8 | 104.001 | 31.605 | 13.5 | 104.030 | 31.631 | 13.5 | 0.45 | 0.21 | 0.49 |
| 0802 | 104.019 | 31.589 | 11.8 | 103.990 | 31.563 | 11.8 | 103.972 | 31.579 | 13.5 | 104.001 | 31.605 | 13.5 | 1.27 | 0.03 | 1.27 |
| 0803 | 103.990 | 31.563 | 11.8 | 103.962 | 31.538 | 11.8 | 103.944 | 31.553 | 13.5 | 103.972 | 31.579 | 13.5 | 1.95 | 0.00 | 1.95 |
| 0804 | 103.962 | 31.538 | 11.8 | 103.933 | 31.512 | 11.8 | 103.915 | 31.528 | 13.5 | 103.944 | 31.553 | 13.5 | 2.13 | 0.00 | 2.13 |
| 0805 | 103.933 | 31.512 | 11.8 | 103.904 | 31.486 | 11.8 | 103.886 | 31.502 | 13.5 | 103.915 | 31.528 | 13.5 | 1.78 | 0.04 | 1.78 |
| 0806 | 103.904 | 31.486 | 11.8 | 103.875 | 31.460 | 11.8 | 103.857 | 31.476 | 13.5 | 103.886 | 31.502 | 13.5 | 1.14 | 0.09 | 1.14 |



|      |         |        |      |         |        |      |         |        |      |         |        |      |      |      |      |
|------|---------|--------|------|---------|--------|------|---------|--------|------|---------|--------|------|------|------|------|
| 0807 | 103.875 | 31.460 | 11.8 | 103.846 | 31.434 | 11.8 | 103.828 | 31.450 | 13.5 | 103.857 | 31.476 | 13.5 | 0.50 | 0.12 | 0.52 |
| 0808 | 103.846 | 31.434 | 11.8 | 103.817 | 31.408 | 11.8 | 103.799 | 31.424 | 13.5 | 103.828 | 31.450 | 13.5 | 0.09 | 0.10 | 0.14 |
| 0809 | 103.817 | 31.408 | 11.8 | 103.788 | 31.382 | 11.8 | 103.770 | 31.398 | 13.5 | 103.799 | 31.424 | 13.5 | 0.00 | 0.05 | 0.05 |
| 0810 | 103.788 | 31.382 | 11.8 | 103.759 | 31.356 | 11.8 | 103.742 | 31.372 | 13.5 | 103.770 | 31.398 | 13.5 | 0.00 | 0.01 | 0.01 |
| 0811 | 103.759 | 31.356 | 11.8 | 103.731 | 31.330 | 11.8 | 103.713 | 31.346 | 13.5 | 103.742 | 31.372 | 13.5 | 0.00 | 0.14 | 0.14 |
| 0812 | 103.731 | 31.330 | 11.8 | 103.702 | 31.304 | 11.8 | 103.684 | 31.320 | 13.5 | 103.713 | 31.346 | 13.5 | 0.00 | 0.69 | 0.69 |
| 0813 | 103.702 | 31.304 | 11.8 | 103.673 | 31.279 | 11.8 | 103.655 | 31.294 | 13.5 | 103.684 | 31.320 | 13.5 | 0.00 | 2.04 | 2.04 |
| 0814 | 103.673 | 31.279 | 11.8 | 103.644 | 31.253 | 11.8 | 103.626 | 31.268 | 13.5 | 103.655 | 31.294 | 13.5 | 0.02 | 4.11 | 4.11 |
| 0815 | 103.644 | 31.253 | 11.8 | 103.615 | 31.227 | 11.8 | 103.597 | 31.243 | 13.5 | 103.626 | 31.268 | 13.5 | 0.00 | 6.29 | 6.29 |
| 0816 | 103.615 | 31.227 | 11.8 | 103.586 | 31.201 | 11.8 | 103.568 | 31.217 | 13.5 | 103.597 | 31.243 | 13.5 | 0.00 | 7.72 | 7.72 |
| 0817 | 103.586 | 31.201 | 11.8 | 103.557 | 31.175 | 11.8 | 103.539 | 31.191 | 13.5 | 103.568 | 31.217 | 13.5 | 0.00 | 7.80 | 7.80 |
| 0818 | 103.557 | 31.175 | 11.8 | 103.528 | 31.149 | 11.8 | 103.510 | 31.165 | 13.5 | 103.539 | 31.191 | 13.5 | 0.01 | 6.59 | 6.59 |
| 0819 | 103.528 | 31.149 | 11.8 | 103.499 | 31.123 | 11.8 | 103.482 | 31.139 | 13.5 | 103.510 | 31.165 | 13.5 | 0.00 | 4.70 | 4.70 |
| 0820 | 103.499 | 31.123 | 11.8 | 103.471 | 31.097 | 11.8 | 103.453 | 31.113 | 13.5 | 103.482 | 31.139 | 13.5 | 0.00 | 2.81 | 2.81 |
| 0821 | 103.471 | 31.097 | 11.8 | 103.442 | 31.071 | 11.8 | 103.424 | 31.087 | 13.5 | 103.453 | 31.113 | 13.5 | 0.00 | 1.38 | 1.38 |
| 0822 | 103.442 | 31.071 | 11.8 | 103.413 | 31.045 | 11.8 | 103.395 | 31.061 | 13.5 | 103.424 | 31.087 | 13.5 | 0.00 | 0.61 | 0.61 |
| 0823 | 103.413 | 31.045 | 11.8 | 103.384 | 31.020 | 11.8 | 103.366 | 31.035 | 13.5 | 103.395 | 31.061 | 13.5 | 0.00 | 0.42 | 0.42 |
| 0824 | 103.384 | 31.020 | 11.8 | 103.355 | 30.994 | 11.8 | 103.337 | 31.009 | 13.5 | 103.366 | 31.035 | 13.5 | 0.16 | 0.49 | 0.52 |
| 0825 | 103.355 | 30.994 | 11.8 | 103.326 | 30.968 | 11.8 | 103.308 | 30.983 | 13.5 | 103.337 | 31.009 | 13.5 | 0.52 | 0.64 | 0.82 |
| 0826 | 103.326 | 30.968 | 11.8 | 103.297 | 30.942 | 11.8 | 103.279 | 30.958 | 13.5 | 103.308 | 30.983 | 13.5 | 0.88 | 1.00 | 1.34 |
| 0827 | 103.297 | 30.942 | 11.8 | 103.269 | 30.916 | 11.8 | 103.251 | 30.932 | 13.5 | 103.279 | 30.958 | 13.5 | 0.87 | 1.56 | 1.79 |
| 0828 | 103.269 | 30.916 | 11.8 | 103.240 | 30.890 | 11.8 | 103.222 | 30.906 | 13.5 | 103.251 | 30.932 | 13.5 | 0.41 | 2.03 | 2.07 |
| 0829 | 103.240 | 30.890 | 11.8 | 103.211 | 30.864 | 11.8 | 103.193 | 30.880 | 13.5 | 103.222 | 30.906 | 13.5 | 0.00 | 2.03 | 2.03 |
| 0830 | 103.211 | 30.864 | 11.8 | 103.182 | 30.838 | 11.8 | 103.164 | 30.854 | 13.5 | 103.193 | 30.880 | 13.5 | 0.00 | 1.51 | 1.51 |
| 0831 | 103.182 | 30.838 | 11.8 | 103.153 | 30.812 | 11.8 | 103.135 | 30.828 | 13.5 | 103.164 | 30.854 | 13.5 | 0.00 | 0.92 | 0.92 |
| 0832 | 103.153 | 30.812 | 11.8 | 103.124 | 30.786 | 11.8 | 103.106 | 30.802 | 13.5 | 103.135 | 30.828 | 13.5 | 0.00 | 0.86 | 0.86 |
| 0833 | 103.124 | 30.786 | 11.8 | 103.095 | 30.761 | 11.8 | 103.077 | 30.776 | 13.5 | 103.106 | 30.802 | 13.5 | 0.00 | 1.00 | 1.00 |
| 0834 | 103.095 | 30.761 | 11.8 | 103.066 | 30.735 | 11.8 | 103.048 | 30.750 | 13.5 | 103.077 | 30.776 | 13.5 | 0.00 | 0.00 | 0.00 |
| 0835 | 104.434 | 31.993 | 13.5 | 104.405 | 31.967 | 13.5 | 104.385 | 31.985 | 14.7 | 104.414 | 32.011 | 14.7 | 0.12 | 0.00 | 0.12 |
| 0836 | 104.405 | 31.967 | 13.5 | 104.376 | 31.941 | 13.5 | 104.356 | 31.959 | 14.7 | 104.385 | 31.985 | 14.7 | 0.06 | 1.12 | 1.12 |
| 0837 | 104.376 | 31.941 | 13.5 | 104.347 | 31.916 | 13.5 | 104.327 | 31.933 | 14.7 | 104.356 | 31.959 | 14.7 | 0.00 | 0.51 | 0.51 |
| 0838 | 104.347 | 31.916 | 13.5 | 104.318 | 31.890 | 13.5 | 104.298 | 31.907 | 14.7 | 104.327 | 31.933 | 14.7 | 0.04 | 0.07 | 0.08 |
| 0839 | 104.318 | 31.890 | 13.5 | 104.290 | 31.864 | 13.5 | 104.269 | 31.881 | 14.7 | 104.298 | 31.907 | 14.7 | 0.26 | 0.03 | 0.26 |
| 0840 | 104.290 | 31.864 | 13.5 | 104.261 | 31.838 | 13.5 | 104.241 | 31.856 | 14.7 | 104.269 | 31.881 | 14.7 | 0.30 | 0.13 | 0.32 |
| 0841 | 104.261 | 31.838 | 13.5 | 104.232 | 31.812 | 13.5 | 104.212 | 31.830 | 14.7 | 104.241 | 31.856 | 14.7 | 0.06 | 0.42 | 0.42 |
| 0842 | 104.232 | 31.812 | 13.5 | 104.203 | 31.786 | 13.5 | 104.183 | 31.804 | 14.7 | 104.212 | 31.830 | 14.7 | 0.00 | 0.76 | 0.76 |
| 0843 | 104.203 | 31.786 | 13.5 | 104.174 | 31.760 | 13.5 | 104.154 | 31.778 | 14.7 | 104.183 | 31.804 | 14.7 | 0.00 | 0.00 | 0.00 |
| 0844 | 104.174 | 31.760 | 13.5 | 104.145 | 31.734 | 13.5 | 104.125 | 31.752 | 14.7 | 104.154 | 31.778 | 14.7 | 0.00 | 0.00 | 0.00 |
| 0845 | 104.145 | 31.734 | 13.5 | 104.116 | 31.708 | 13.5 | 104.096 | 31.726 | 14.7 | 104.125 | 31.752 | 14.7 | 0.00 | 0.00 | 0.00 |
| 0846 | 104.116 | 31.708 | 13.5 | 104.087 | 31.682 | 13.5 | 104.067 | 31.700 | 14.7 | 104.096 | 31.726 | 14.7 | 0.00 | 0.00 | 0.00 |
| 0847 | 104.087 | 31.682 | 13.5 | 104.058 | 31.657 | 13.5 | 104.038 | 31.674 | 14.7 | 104.067 | 31.700 | 14.7 | 0.00 | 0.35 | 0.35 |
| 0848 | 104.058 | 31.657 | 13.5 | 104.030 | 31.631 | 13.5 | 104.010 | 31.648 | 14.7 | 104.038 | 31.674 | 14.7 | 0.00 | 0.00 | 0.00 |
| 0849 | 104.030 | 31.631 | 13.5 | 104.001 | 31.605 | 13.5 | 103.981 | 31.622 | 14.7 | 104.010 | 31.648 | 14.7 | 0.36 | 0.00 | 0.36 |
| 0850 | 104.001 | 31.605 | 13.5 | 103.972 | 31.579 | 13.5 | 103.952 | 31.596 | 14.7 | 103.981 | 31.622 | 14.7 | 1.08 | 0.00 | 1.08 |
| 0851 | 103.972 | 31.579 | 13.5 | 103.943 | 31.553 | 13.5 | 103.923 | 31.571 | 14.7 | 103.952 | 31.596 | 14.7 | 1.70 | 0.00 | 1.70 |

|      |         |        |      |         |        |      |         |        |      |         |        |      |      |      |      |
|------|---------|--------|------|---------|--------|------|---------|--------|------|---------|--------|------|------|------|------|
| 0852 | 103.943 | 31.553 | 13.5 | 103.914 | 31.527 | 13.5 | 103.894 | 31.545 | 14.7 | 103.923 | 31.571 | 14.7 | 1.93 | 0.00 | 1.93 |
| 0853 | 103.914 | 31.527 | 13.5 | 103.885 | 31.501 | 13.5 | 103.865 | 31.519 | 14.7 | 103.894 | 31.545 | 14.7 | 1.76 | 0.00 | 1.76 |
| 0854 | 103.885 | 31.501 | 13.5 | 103.856 | 31.475 | 13.5 | 103.836 | 31.493 | 14.7 | 103.865 | 31.519 | 14.7 | 1.33 | 0.00 | 1.33 |
| 0855 | 103.856 | 31.475 | 13.5 | 103.827 | 31.449 | 13.5 | 103.807 | 31.467 | 14.7 | 103.836 | 31.493 | 14.7 | 0.82 | 0.00 | 0.82 |
| 0856 | 103.827 | 31.449 | 13.5 | 103.799 | 31.423 | 13.5 | 103.778 | 31.441 | 14.7 | 103.807 | 31.467 | 14.7 | 0.36 | 0.00 | 0.36 |
| 0857 | 103.799 | 31.423 | 13.5 | 103.770 | 31.397 | 13.5 | 103.750 | 31.415 | 14.7 | 103.778 | 31.441 | 14.7 | 0.06 | 0.00 | 0.06 |
| 0858 | 103.770 | 31.397 | 13.5 | 103.741 | 31.372 | 13.5 | 103.721 | 31.389 | 14.7 | 103.750 | 31.415 | 14.7 | 0.00 | 0.00 | 0.00 |
| 0859 | 103.741 | 31.372 | 13.5 | 103.712 | 31.346 | 13.5 | 103.692 | 31.363 | 14.7 | 103.721 | 31.389 | 14.7 | 0.00 | 0.00 | 0.00 |
| 0860 | 103.712 | 31.346 | 13.5 | 103.683 | 31.320 | 13.5 | 103.663 | 31.337 | 14.7 | 103.692 | 31.363 | 14.7 | 0.00 | 0.10 | 0.10 |
| 0861 | 103.683 | 31.320 | 13.5 | 103.654 | 31.294 | 13.5 | 103.634 | 31.311 | 14.7 | 103.663 | 31.337 | 14.7 | 0.00 | 0.81 | 0.81 |
| 0862 | 103.654 | 31.294 | 13.5 | 103.625 | 31.268 | 13.5 | 103.605 | 31.286 | 14.7 | 103.634 | 31.311 | 14.7 | 0.00 | 2.25 | 2.25 |
| 0863 | 103.625 | 31.268 | 13.5 | 103.596 | 31.242 | 13.5 | 103.576 | 31.260 | 14.7 | 103.605 | 31.286 | 14.7 | 0.00 | 3.99 | 3.99 |
| 0864 | 103.596 | 31.242 | 13.5 | 103.567 | 31.216 | 13.5 | 103.547 | 31.234 | 14.7 | 103.576 | 31.260 | 14.7 | 0.08 | 5.24 | 5.25 |
| 0865 | 103.567 | 31.216 | 13.5 | 103.539 | 31.190 | 13.5 | 103.519 | 31.208 | 14.7 | 103.547 | 31.234 | 14.7 | 0.20 | 5.45 | 5.46 |
| 0866 | 103.539 | 31.190 | 13.5 | 103.510 | 31.164 | 13.5 | 103.490 | 31.182 | 14.7 | 103.519 | 31.208 | 14.7 | 0.32 | 4.61 | 4.62 |
| 0867 | 103.510 | 31.164 | 13.5 | 103.481 | 31.138 | 13.5 | 103.461 | 31.156 | 14.7 | 103.490 | 31.182 | 14.7 | 0.38 | 3.21 | 3.23 |
| 0868 | 103.481 | 31.138 | 13.5 | 103.452 | 31.113 | 13.5 | 103.432 | 31.130 | 14.7 | 103.461 | 31.156 | 14.7 | 0.35 | 1.82 | 1.86 |
| 0869 | 103.452 | 31.113 | 13.5 | 103.423 | 31.087 | 13.5 | 103.403 | 31.104 | 14.7 | 103.432 | 31.130 | 14.7 | 0.27 | 0.79 | 0.84 |
| 0870 | 103.423 | 31.087 | 13.5 | 103.394 | 31.061 | 13.5 | 103.374 | 31.078 | 14.7 | 103.403 | 31.104 | 14.7 | 0.21 | 0.20 | 0.30 |
| 0871 | 103.394 | 31.061 | 13.5 | 103.365 | 31.035 | 13.5 | 103.345 | 31.052 | 14.7 | 103.374 | 31.078 | 14.7 | 0.26 | 0.00 | 0.26 |
| 0872 | 103.365 | 31.035 | 13.5 | 103.336 | 31.009 | 13.5 | 103.316 | 31.026 | 14.7 | 103.345 | 31.052 | 14.7 | 0.55 | 0.00 | 0.55 |
| 0873 | 103.336 | 31.009 | 13.5 | 103.308 | 30.983 | 13.5 | 103.288 | 31.001 | 14.7 | 103.316 | 31.026 | 14.7 | 1.07 | 0.09 | 1.07 |
| 0874 | 103.308 | 30.983 | 13.5 | 103.279 | 30.957 | 13.5 | 103.259 | 30.975 | 14.7 | 103.288 | 31.001 | 14.7 | 1.52 | 0.64 | 1.65 |
| 0875 | 103.279 | 30.957 | 13.5 | 103.250 | 30.931 | 13.5 | 103.230 | 30.949 | 14.7 | 103.259 | 30.975 | 14.7 | 1.43 | 1.62 | 2.16 |
| 0876 | 103.250 | 30.931 | 13.5 | 103.221 | 30.905 | 13.5 | 103.201 | 30.923 | 14.7 | 103.230 | 30.949 | 14.7 | 0.70 | 2.50 | 2.59 |
| 0877 | 103.221 | 30.905 | 13.5 | 103.192 | 30.879 | 13.5 | 103.172 | 30.897 | 14.7 | 103.201 | 30.923 | 14.7 | 0.00 | 2.66 | 2.66 |
| 0878 | 103.192 | 30.879 | 13.5 | 103.163 | 30.853 | 13.5 | 103.143 | 30.871 | 14.7 | 103.172 | 30.897 | 14.7 | 0.00 | 1.96 | 1.96 |
| 0879 | 103.163 | 30.853 | 13.5 | 103.134 | 30.828 | 13.5 | 103.114 | 30.845 | 14.7 | 103.143 | 30.871 | 14.7 | 0.00 | 1.00 | 1.00 |
| 0880 | 103.134 | 30.828 | 13.5 | 103.105 | 30.802 | 13.5 | 103.085 | 30.819 | 14.7 | 103.114 | 30.845 | 14.7 | 0.00 | 0.89 | 0.89 |
| 0881 | 103.105 | 30.802 | 13.5 | 103.076 | 30.776 | 13.5 | 103.056 | 30.793 | 14.7 | 103.085 | 30.819 | 14.7 | 0.00 | 1.00 | 1.00 |
| 0882 | 103.076 | 30.776 | 13.5 | 103.048 | 30.750 | 13.5 | 103.028 | 30.767 | 14.7 | 103.056 | 30.793 | 14.7 | 0.00 | 0.00 | 0.00 |
| 0883 | 104.413 | 32.010 | 14.7 | 104.384 | 31.985 | 14.7 | 104.363 | 32.003 | 15.4 | 104.392 | 32.029 | 15.4 | 0.15 | 0.00 | 0.15 |
| 0884 | 104.384 | 31.985 | 14.7 | 104.355 | 31.959 | 14.7 | 104.334 | 31.977 | 15.4 | 104.363 | 32.003 | 15.4 | 0.16 | 1.03 | 1.04 |
| 0885 | 104.355 | 31.959 | 14.7 | 104.326 | 31.933 | 14.7 | 104.305 | 31.952 | 15.4 | 104.334 | 31.977 | 15.4 | 0.04 | 0.37 | 0.37 |
| 0886 | 104.326 | 31.933 | 14.7 | 104.297 | 31.907 | 14.7 | 104.276 | 31.926 | 15.4 | 104.305 | 31.952 | 15.4 | 0.00 | 0.00 | 0.00 |
| 0887 | 104.297 | 31.907 | 14.7 | 104.269 | 31.881 | 14.7 | 104.247 | 31.900 | 15.4 | 104.276 | 31.926 | 15.4 | 0.01 | 0.00 | 0.01 |
| 0888 | 104.269 | 31.881 | 14.7 | 104.240 | 31.855 | 14.7 | 104.219 | 31.874 | 15.4 | 104.247 | 31.900 | 15.4 | 0.05 | 0.00 | 0.05 |
| 0889 | 104.240 | 31.855 | 14.7 | 104.211 | 31.829 | 14.7 | 104.190 | 31.848 | 15.4 | 104.219 | 31.874 | 15.4 | 0.00 | 0.20 | 0.20 |
| 0890 | 104.211 | 31.829 | 14.7 | 104.182 | 31.803 | 14.7 | 104.161 | 31.822 | 15.4 | 104.190 | 31.848 | 15.4 | 0.00 | 0.64 | 0.64 |
| 0891 | 104.182 | 31.803 | 14.7 | 104.153 | 31.777 | 14.7 | 104.132 | 31.796 | 15.4 | 104.161 | 31.822 | 15.4 | 0.00 | 0.00 | 0.00 |
| 0892 | 104.153 | 31.777 | 14.7 | 104.124 | 31.751 | 14.7 | 104.103 | 31.770 | 15.4 | 104.132 | 31.796 | 15.4 | 0.00 | 0.00 | 0.00 |
| 0893 | 104.124 | 31.751 | 14.7 | 104.095 | 31.725 | 14.7 | 104.074 | 31.744 | 15.4 | 104.103 | 31.770 | 15.4 | 0.00 | 0.00 | 0.00 |
| 0894 | 104.095 | 31.725 | 14.7 | 104.067 | 31.700 | 14.7 | 104.045 | 31.718 | 15.4 | 104.074 | 31.744 | 15.4 | 0.00 | 0.00 | 0.00 |
| 0895 | 104.067 | 31.700 | 14.7 | 104.038 | 31.674 | 14.7 | 104.016 | 31.692 | 15.4 | 104.045 | 31.718 | 15.4 | 0.00 | 0.29 | 0.29 |
| 0896 | 104.038 | 31.674 | 14.7 | 104.009 | 31.648 | 14.7 | 103.987 | 31.666 | 15.4 | 104.016 | 31.692 | 15.4 | 0.00 | 0.00 | 0.00 |

|      |         |        |      |         |        |      |         |        |      |         |        |      |      |      |      |
|------|---------|--------|------|---------|--------|------|---------|--------|------|---------|--------|------|------|------|------|
| 0897 | 104.009 | 31.648 | 14.7 | 103.980 | 31.622 | 14.7 | 103.959 | 31.641 | 15.4 | 103.987 | 31.666 | 15.4 | 0.35 | 0.00 | 0.35 |
| 0898 | 103.980 | 31.622 | 14.7 | 103.951 | 31.596 | 14.7 | 103.930 | 31.615 | 15.4 | 103.959 | 31.641 | 15.4 | 0.98 | 0.00 | 0.98 |
| 0899 | 103.951 | 31.596 | 14.7 | 103.922 | 31.570 | 14.7 | 103.901 | 31.589 | 15.4 | 103.930 | 31.615 | 15.4 | 1.53 | 0.00 | 1.53 |
| 0900 | 103.922 | 31.570 | 14.7 | 103.893 | 31.544 | 14.7 | 103.872 | 31.563 | 15.4 | 103.901 | 31.589 | 15.4 | 1.81 | 0.00 | 1.81 |
| 0901 | 103.893 | 31.544 | 14.7 | 103.864 | 31.518 | 14.7 | 103.843 | 31.537 | 15.4 | 103.872 | 31.563 | 15.4 | 1.82 | 0.00 | 1.82 |
| 0902 | 103.864 | 31.518 | 14.7 | 103.835 | 31.492 | 14.7 | 103.814 | 31.511 | 15.4 | 103.843 | 31.537 | 15.4 | 1.63 | 0.00 | 1.63 |
| 0903 | 103.835 | 31.492 | 14.7 | 103.807 | 31.466 | 14.7 | 103.785 | 31.485 | 15.4 | 103.814 | 31.511 | 15.4 | 1.27 | 0.00 | 1.27 |
| 0904 | 103.807 | 31.466 | 14.7 | 103.778 | 31.440 | 14.7 | 103.756 | 31.459 | 15.4 | 103.785 | 31.485 | 15.4 | 0.76 | 0.00 | 0.76 |
| 0905 | 103.778 | 31.440 | 14.7 | 103.749 | 31.415 | 14.7 | 103.728 | 31.433 | 15.4 | 103.756 | 31.459 | 15.4 | 0.25 | 0.00 | 0.25 |
| 0906 | 103.749 | 31.415 | 14.7 | 103.720 | 31.389 | 14.7 | 103.699 | 31.407 | 15.4 | 103.728 | 31.433 | 15.4 | 0.00 | 0.00 | 0.00 |
| 0907 | 103.720 | 31.389 | 14.7 | 103.691 | 31.363 | 14.7 | 103.670 | 31.381 | 15.4 | 103.699 | 31.407 | 15.4 | 0.00 | 0.00 | 0.00 |
| 0908 | 103.691 | 31.363 | 14.7 | 103.662 | 31.337 | 14.7 | 103.641 | 31.356 | 15.4 | 103.670 | 31.381 | 15.4 | 0.00 | 0.00 | 0.00 |
| 0909 | 103.662 | 31.337 | 14.7 | 103.633 | 31.311 | 14.7 | 103.612 | 31.330 | 15.4 | 103.641 | 31.356 | 15.4 | 0.04 | 0.14 | 0.14 |
| 0910 | 103.633 | 31.311 | 14.7 | 103.604 | 31.285 | 14.7 | 103.583 | 31.304 | 15.4 | 103.612 | 31.330 | 15.4 | 0.20 | 0.87 | 0.89 |
| 0911 | 103.604 | 31.285 | 14.7 | 103.576 | 31.259 | 14.7 | 103.554 | 31.278 | 15.4 | 103.583 | 31.304 | 15.4 | 0.36 | 2.02 | 2.05 |
| 0912 | 103.576 | 31.259 | 14.7 | 103.547 | 31.233 | 14.7 | 103.525 | 31.252 | 15.4 | 103.554 | 31.278 | 15.4 | 0.50 | 3.02 | 3.06 |
| 0913 | 103.547 | 31.233 | 14.7 | 103.518 | 31.207 | 14.7 | 103.496 | 31.226 | 15.4 | 103.525 | 31.252 | 15.4 | 0.67 | 3.36 | 3.43 |
| 0914 | 103.518 | 31.207 | 14.7 | 103.489 | 31.181 | 14.7 | 103.468 | 31.200 | 15.4 | 103.496 | 31.226 | 15.4 | 0.87 | 2.96 | 3.09 |
| 0915 | 103.489 | 31.181 | 14.7 | 103.460 | 31.155 | 14.7 | 103.439 | 31.174 | 15.4 | 103.468 | 31.200 | 15.4 | 1.01 | 2.13 | 2.36 |
| 0916 | 103.460 | 31.155 | 14.7 | 103.431 | 31.129 | 14.7 | 103.410 | 31.148 | 15.4 | 103.439 | 31.174 | 15.4 | 0.98 | 1.26 | 1.60 |
| 0917 | 103.431 | 31.129 | 14.7 | 103.402 | 31.104 | 14.7 | 103.381 | 31.122 | 15.4 | 103.410 | 31.148 | 15.4 | 0.81 | 0.59 | 1.00 |
| 0918 | 103.402 | 31.104 | 14.7 | 103.373 | 31.078 | 14.7 | 103.352 | 31.096 | 15.4 | 103.381 | 31.122 | 15.4 | 0.63 | 0.17 | 0.65 |
| 0919 | 103.373 | 31.078 | 14.7 | 103.344 | 31.052 | 14.7 | 103.323 | 31.070 | 15.4 | 103.352 | 31.096 | 15.4 | 0.61 | 0.00 | 0.61 |
| 0920 | 103.344 | 31.052 | 14.7 | 103.316 | 31.026 | 14.7 | 103.294 | 31.045 | 15.4 | 103.323 | 31.070 | 15.4 | 0.90 | 0.00 | 0.90 |
| 0921 | 103.316 | 31.026 | 14.7 | 103.287 | 31.000 | 14.7 | 103.266 | 31.019 | 15.4 | 103.294 | 31.045 | 15.4 | 1.48 | 0.00 | 1.48 |
| 0922 | 103.287 | 31.000 | 14.7 | 103.258 | 30.974 | 14.7 | 103.237 | 30.993 | 15.4 | 103.266 | 31.019 | 15.4 | 1.97 | 0.59 | 2.06 |
| 0923 | 103.258 | 30.974 | 14.7 | 103.229 | 30.948 | 14.7 | 103.208 | 30.967 | 15.4 | 103.237 | 30.993 | 15.4 | 1.83 | 1.78 | 2.56 |
| 0924 | 103.229 | 30.948 | 14.7 | 103.200 | 30.922 | 14.7 | 103.179 | 30.941 | 15.4 | 103.208 | 30.967 | 15.4 | 0.93 | 2.90 | 3.05 |
| 0925 | 103.200 | 30.922 | 14.7 | 103.171 | 30.896 | 14.7 | 103.150 | 30.915 | 15.4 | 103.179 | 30.941 | 15.4 | 0.03 | 3.15 | 3.15 |
| 0926 | 103.171 | 30.896 | 14.7 | 103.142 | 30.870 | 14.7 | 103.121 | 30.889 | 15.4 | 103.150 | 30.915 | 15.4 | 0.00 | 2.29 | 2.29 |
| 0927 | 103.142 | 30.870 | 14.7 | 103.114 | 30.844 | 14.7 | 103.092 | 30.863 | 15.4 | 103.121 | 30.889 | 15.4 | 0.00 | 1.00 | 1.00 |
| 0928 | 103.114 | 30.844 | 14.7 | 103.085 | 30.819 | 14.7 | 103.063 | 30.837 | 15.4 | 103.092 | 30.863 | 15.4 | 0.00 | 0.91 | 0.91 |
| 0929 | 103.085 | 30.819 | 14.7 | 103.056 | 30.793 | 14.7 | 103.034 | 30.811 | 15.4 | 103.063 | 30.837 | 15.4 | 0.00 | 1.00 | 1.00 |
| 0930 | 103.056 | 30.793 | 14.7 | 103.027 | 30.767 | 14.7 | 103.006 | 30.785 | 15.4 | 103.034 | 30.811 | 15.4 | 0.00 | 0.00 | 0.00 |
| 0931 | 104.391 | 32.029 | 15.4 | 104.362 | 32.003 | 15.4 | 104.340 | 32.022 | 15.9 | 104.369 | 32.048 | 15.9 | 0.20 | 0.00 | 0.20 |
| 0932 | 104.362 | 32.003 | 15.4 | 104.333 | 31.977 | 15.4 | 104.311 | 31.996 | 15.9 | 104.340 | 32.022 | 15.9 | 0.31 | 1.10 | 1.15 |
| 0933 | 104.333 | 31.977 | 15.4 | 104.304 | 31.951 | 15.4 | 104.283 | 31.970 | 15.9 | 104.311 | 31.996 | 15.9 | 0.22 | 0.44 | 0.49 |
| 0934 | 104.304 | 31.951 | 15.4 | 104.275 | 31.925 | 15.4 | 104.254 | 31.944 | 15.9 | 104.283 | 31.970 | 15.9 | 0.12 | 0.00 | 0.12 |
| 0935 | 104.275 | 31.925 | 15.4 | 104.246 | 31.899 | 15.4 | 104.225 | 31.918 | 15.9 | 104.254 | 31.944 | 15.9 | 0.14 | 0.00 | 0.14 |
| 0936 | 104.246 | 31.899 | 15.4 | 104.218 | 31.873 | 15.4 | 104.196 | 31.892 | 15.9 | 104.225 | 31.918 | 15.9 | 0.21 | 0.00 | 0.21 |
| 0937 | 104.218 | 31.873 | 15.4 | 104.189 | 31.847 | 15.4 | 104.167 | 31.866 | 15.9 | 104.196 | 31.892 | 15.9 | 0.13 | 0.18 | 0.23 |
| 0938 | 104.189 | 31.847 | 15.4 | 104.160 | 31.821 | 15.4 | 104.138 | 31.841 | 15.9 | 104.167 | 31.866 | 15.9 | 0.00 | 0.63 | 0.63 |
| 0939 | 104.160 | 31.821 | 15.4 | 104.131 | 31.795 | 15.4 | 104.109 | 31.815 | 15.9 | 104.138 | 31.841 | 15.9 | 0.00 | 0.00 | 0.00 |
| 0940 | 104.131 | 31.795 | 15.4 | 104.102 | 31.770 | 15.4 | 104.080 | 31.789 | 15.9 | 104.109 | 31.815 | 15.9 | 0.00 | 0.00 | 0.00 |
| 0941 | 104.102 | 31.770 | 15.4 | 104.073 | 31.744 | 15.4 | 104.052 | 31.763 | 15.9 | 104.080 | 31.789 | 15.9 | 0.00 | 0.00 | 0.00 |

|      |         |        |      |         |        |      |         |        |      |         |        |      |      |      |      |
|------|---------|--------|------|---------|--------|------|---------|--------|------|---------|--------|------|------|------|------|
| 0942 | 104.073 | 31.744 | 15.4 | 104.044 | 31.718 | 15.4 | 104.023 | 31.737 | 15.9 | 104.052 | 31.763 | 15.9 | 0.00 | 0.00 | 0.00 |
| 0943 | 104.044 | 31.718 | 15.4 | 104.015 | 31.692 | 15.4 | 103.994 | 31.711 | 15.9 | 104.023 | 31.737 | 15.9 | 0.00 | 0.35 | 0.35 |
| 0944 | 104.015 | 31.692 | 15.4 | 103.987 | 31.666 | 15.4 | 103.965 | 31.685 | 15.9 | 103.994 | 31.711 | 15.9 | 0.00 | 0.00 | 0.00 |
| 0945 | 103.987 | 31.666 | 15.4 | 103.958 | 31.640 | 15.4 | 103.936 | 31.659 | 15.9 | 103.965 | 31.685 | 15.9 | 0.30 | 0.00 | 0.30 |
| 0946 | 103.958 | 31.640 | 15.4 | 103.929 | 31.614 | 15.4 | 103.907 | 31.633 | 15.9 | 103.936 | 31.659 | 15.9 | 0.79 | 0.00 | 0.79 |
| 0947 | 103.929 | 31.614 | 15.4 | 103.900 | 31.588 | 15.4 | 103.878 | 31.607 | 15.9 | 103.907 | 31.633 | 15.9 | 1.24 | 0.00 | 1.24 |
| 0948 | 103.900 | 31.588 | 15.4 | 103.871 | 31.562 | 15.4 | 103.849 | 31.581 | 15.9 | 103.878 | 31.607 | 15.9 | 1.53 | 0.00 | 1.53 |
| 0949 | 103.871 | 31.562 | 15.4 | 103.842 | 31.536 | 15.4 | 103.820 | 31.555 | 15.9 | 103.849 | 31.581 | 15.9 | 1.73 | 0.00 | 1.73 |
| 0950 | 103.842 | 31.536 | 15.4 | 103.813 | 31.510 | 15.4 | 103.792 | 31.529 | 15.9 | 103.820 | 31.555 | 15.9 | 1.83 | 0.00 | 1.83 |
| 0951 | 103.813 | 31.510 | 15.4 | 103.784 | 31.484 | 15.4 | 103.763 | 31.504 | 15.9 | 103.792 | 31.529 | 15.9 | 1.69 | 0.00 | 1.69 |
| 0952 | 103.784 | 31.484 | 15.4 | 103.755 | 31.459 | 15.4 | 103.734 | 31.478 | 15.9 | 103.763 | 31.504 | 15.9 | 1.20 | 0.00 | 1.20 |
| 0953 | 103.755 | 31.459 | 15.4 | 103.727 | 31.433 | 15.4 | 103.705 | 31.452 | 15.9 | 103.734 | 31.478 | 15.9 | 0.50 | 0.00 | 0.50 |
| 0954 | 103.727 | 31.433 | 15.4 | 103.698 | 31.407 | 15.4 | 103.676 | 31.426 | 15.9 | 103.705 | 31.452 | 15.9 | 0.02 | 0.00 | 0.02 |
| 0955 | 103.698 | 31.407 | 15.4 | 103.669 | 31.381 | 15.4 | 103.647 | 31.400 | 15.9 | 103.676 | 31.426 | 15.9 | 0.00 | 0.00 | 0.00 |
| 0956 | 103.669 | 31.381 | 15.4 | 103.640 | 31.355 | 15.4 | 103.618 | 31.374 | 15.9 | 103.647 | 31.400 | 15.9 | 0.00 | 0.00 | 0.00 |
| 0957 | 103.640 | 31.355 | 15.4 | 103.611 | 31.329 | 15.4 | 103.590 | 31.348 | 15.9 | 103.618 | 31.374 | 15.9 | 0.20 | 0.00 | 0.20 |
| 0958 | 103.611 | 31.329 | 15.4 | 103.582 | 31.303 | 15.4 | 103.561 | 31.322 | 15.9 | 103.590 | 31.348 | 15.9 | 0.59 | 0.17 | 0.61 |
| 0959 | 103.582 | 31.303 | 15.4 | 103.553 | 31.277 | 15.4 | 103.532 | 31.296 | 15.9 | 103.561 | 31.322 | 15.9 | 0.91 | 0.74 | 1.17 |
| 0960 | 103.553 | 31.277 | 15.4 | 103.525 | 31.251 | 15.4 | 103.503 | 31.270 | 15.9 | 103.532 | 31.296 | 15.9 | 1.08 | 1.48 | 1.83 |
| 0961 | 103.525 | 31.251 | 15.4 | 103.496 | 31.225 | 15.4 | 103.474 | 31.244 | 15.9 | 103.503 | 31.270 | 15.9 | 1.23 | 1.96 | 2.32 |
| 0962 | 103.496 | 31.225 | 15.4 | 103.467 | 31.199 | 15.4 | 103.445 | 31.218 | 15.9 | 103.474 | 31.244 | 15.9 | 1.45 | 2.01 | 2.48 |
| 0963 | 103.467 | 31.199 | 15.4 | 103.438 | 31.173 | 15.4 | 103.416 | 31.193 | 15.9 | 103.445 | 31.218 | 15.9 | 1.63 | 1.74 | 2.38 |
| 0964 | 103.438 | 31.173 | 15.4 | 103.409 | 31.148 | 15.4 | 103.387 | 31.167 | 15.9 | 103.416 | 31.193 | 15.9 | 1.59 | 1.33 | 2.08 |
| 0965 | 103.409 | 31.148 | 15.4 | 103.380 | 31.122 | 15.4 | 103.358 | 31.141 | 15.9 | 103.387 | 31.167 | 15.9 | 1.30 | 0.93 | 1.60 |
| 0966 | 103.380 | 31.122 | 15.4 | 103.351 | 31.096 | 15.4 | 103.330 | 31.115 | 15.9 | 103.358 | 31.141 | 15.9 | 0.94 | 0.54 | 1.09 |
| 0967 | 103.351 | 31.096 | 15.4 | 103.322 | 31.070 | 15.4 | 103.301 | 31.089 | 15.9 | 103.330 | 31.115 | 15.9 | 0.75 | 0.21 | 0.78 |
| 0968 | 103.322 | 31.070 | 15.4 | 103.293 | 31.044 | 15.4 | 103.272 | 31.063 | 15.9 | 103.301 | 31.089 | 15.9 | 0.93 | 0.00 | 0.93 |
| 0969 | 103.293 | 31.044 | 15.4 | 103.265 | 31.018 | 15.4 | 103.243 | 31.037 | 15.9 | 103.272 | 31.063 | 15.9 | 1.47 | 0.00 | 1.47 |
| 0970 | 103.265 | 31.018 | 15.4 | 103.236 | 30.992 | 15.4 | 103.214 | 31.011 | 15.9 | 103.243 | 31.037 | 15.9 | 1.99 | 0.50 | 2.06 |
| 0971 | 103.236 | 30.992 | 15.4 | 103.207 | 30.966 | 15.4 | 103.185 | 30.985 | 15.9 | 103.214 | 31.011 | 15.9 | 1.89 | 1.62 | 2.49 |
| 0972 | 103.207 | 30.966 | 15.4 | 103.178 | 30.940 | 15.4 | 103.156 | 30.959 | 15.9 | 103.185 | 30.985 | 15.9 | 0.96 | 2.72 | 2.88 |
| 0973 | 103.178 | 30.940 | 15.4 | 103.149 | 30.914 | 15.4 | 103.127 | 30.933 | 15.9 | 103.156 | 30.959 | 15.9 | 0.02 | 2.98 | 2.98 |
| 0974 | 103.149 | 30.914 | 15.4 | 103.120 | 30.888 | 15.4 | 103.099 | 30.907 | 15.9 | 103.127 | 30.933 | 15.9 | 0.00 | 2.19 | 2.19 |
| 0975 | 103.120 | 30.888 | 15.4 | 103.091 | 30.862 | 15.4 | 103.070 | 30.881 | 15.9 | 103.099 | 30.907 | 15.9 | 0.00 | 1.00 | 1.00 |
| 0976 | 103.091 | 30.862 | 15.4 | 103.062 | 30.837 | 15.4 | 103.041 | 30.856 | 15.9 | 103.070 | 30.881 | 15.9 | 0.00 | 0.86 | 0.86 |
| 0977 | 103.062 | 30.837 | 15.4 | 103.034 | 30.811 | 15.4 | 103.012 | 30.830 | 15.9 | 103.041 | 30.856 | 15.9 | 0.00 | 1.00 | 1.00 |
| 0978 | 103.034 | 30.811 | 15.4 | 103.005 | 30.785 | 15.4 | 102.983 | 30.804 | 15.9 | 103.012 | 30.830 | 15.9 | 0.00 | 0.00 | 0.00 |
| 0979 | 104.368 | 32.047 | 15.9 | 104.339 | 32.021 | 15.9 | 104.318 | 32.041 | 16.2 | 104.347 | 32.067 | 16.2 | 0.23 | 0.00 | 0.23 |
| 0980 | 104.339 | 32.021 | 15.9 | 104.311 | 31.995 | 15.9 | 104.289 | 32.015 | 16.2 | 104.318 | 32.041 | 16.2 | 0.50 | 1.18 | 1.28 |
| 0981 | 104.311 | 31.995 | 15.9 | 104.282 | 31.969 | 15.9 | 104.260 | 31.989 | 16.2 | 104.289 | 32.015 | 16.2 | 0.49 | 0.53 | 0.73 |
| 0982 | 104.282 | 31.969 | 15.9 | 104.253 | 31.944 | 15.9 | 104.231 | 31.963 | 16.2 | 104.260 | 31.989 | 16.2 | 0.43 | 0.00 | 0.43 |
| 0983 | 104.253 | 31.944 | 15.9 | 104.224 | 31.918 | 15.9 | 104.202 | 31.937 | 16.2 | 104.231 | 31.963 | 16.2 | 0.49 | 0.00 | 0.49 |
| 0984 | 104.224 | 31.918 | 15.9 | 104.195 | 31.892 | 15.9 | 104.173 | 31.911 | 16.2 | 104.202 | 31.937 | 16.2 | 0.55 | 0.00 | 0.55 |
| 0985 | 104.195 | 31.892 | 15.9 | 104.166 | 31.866 | 15.9 | 104.144 | 31.885 | 16.2 | 104.173 | 31.911 | 16.2 | 0.40 | 0.16 | 0.43 |
| 0986 | 104.166 | 31.866 | 15.9 | 104.137 | 31.840 | 15.9 | 104.115 | 31.859 | 16.2 | 104.144 | 31.885 | 16.2 | 0.11 | 0.61 | 0.62 |

|      |         |        |      |         |        |      |         |        |      |         |        |      |      |      |      |
|------|---------|--------|------|---------|--------|------|---------|--------|------|---------|--------|------|------|------|------|
| 0987 | 104.137 | 31.840 | 15.9 | 104.108 | 31.814 | 15.9 | 104.087 | 31.833 | 16.2 | 104.115 | 31.859 | 16.2 | 0.00 | 0.00 | 0.00 |
| 0988 | 104.108 | 31.814 | 15.9 | 104.079 | 31.788 | 15.9 | 104.058 | 31.807 | 16.2 | 104.087 | 31.833 | 16.2 | 0.00 | 0.00 | 0.00 |
| 0989 | 104.079 | 31.788 | 15.9 | 104.051 | 31.762 | 15.9 | 104.029 | 31.781 | 16.2 | 104.058 | 31.807 | 16.2 | 0.00 | 0.00 | 0.00 |
| 0990 | 104.051 | 31.762 | 15.9 | 104.022 | 31.736 | 15.9 | 104.000 | 31.756 | 16.2 | 104.029 | 31.781 | 16.2 | 0.00 | 0.00 | 0.00 |
| 0991 | 104.022 | 31.736 | 15.9 | 103.993 | 31.710 | 15.9 | 103.971 | 31.730 | 16.2 | 104.000 | 31.756 | 16.2 | 0.00 | 0.46 | 0.46 |
| 0992 | 103.993 | 31.710 | 15.9 | 103.964 | 31.684 | 15.9 | 103.942 | 31.704 | 16.2 | 103.971 | 31.730 | 16.2 | 0.00 | 0.02 | 0.02 |
| 0993 | 103.964 | 31.684 | 15.9 | 103.935 | 31.658 | 15.9 | 103.913 | 31.678 | 16.2 | 103.942 | 31.704 | 16.2 | 0.19 | 0.00 | 0.19 |
| 0994 | 103.935 | 31.658 | 15.9 | 103.906 | 31.633 | 15.9 | 103.884 | 31.652 | 16.2 | 103.913 | 31.678 | 16.2 | 0.48 | 0.00 | 0.48 |
| 0995 | 103.906 | 31.633 | 15.9 | 103.877 | 31.607 | 15.9 | 103.856 | 31.626 | 16.2 | 103.884 | 31.652 | 16.2 | 0.75 | 0.00 | 0.75 |
| 0996 | 103.877 | 31.607 | 15.9 | 103.848 | 31.581 | 15.9 | 103.827 | 31.600 | 16.2 | 103.856 | 31.626 | 16.2 | 1.02 | 0.00 | 1.02 |
| 0997 | 103.848 | 31.581 | 15.9 | 103.820 | 31.555 | 15.9 | 103.798 | 31.574 | 16.2 | 103.827 | 31.600 | 16.2 | 1.40 | 0.00 | 1.40 |
| 0998 | 103.820 | 31.555 | 15.9 | 103.791 | 31.529 | 15.9 | 103.769 | 31.548 | 16.2 | 103.798 | 31.574 | 16.2 | 1.82 | 0.00 | 1.82 |
| 0999 | 103.791 | 31.529 | 15.9 | 103.762 | 31.503 | 15.9 | 103.740 | 31.522 | 16.2 | 103.769 | 31.548 | 16.2 | 1.98 | 0.00 | 1.98 |
| 1000 | 103.762 | 31.503 | 15.9 | 103.733 | 31.477 | 15.9 | 103.711 | 31.496 | 16.2 | 103.740 | 31.522 | 16.2 | 1.59 | 0.00 | 1.59 |
| 1001 | 103.733 | 31.477 | 15.9 | 103.704 | 31.451 | 15.9 | 103.682 | 31.470 | 16.2 | 103.711 | 31.496 | 16.2 | 0.77 | 0.00 | 0.77 |
| 1002 | 103.704 | 31.451 | 15.9 | 103.675 | 31.425 | 15.9 | 103.653 | 31.444 | 16.2 | 103.682 | 31.470 | 16.2 | 0.08 | 0.00 | 0.08 |
| 1003 | 103.675 | 31.425 | 15.9 | 103.646 | 31.399 | 15.9 | 103.624 | 31.419 | 16.2 | 103.653 | 31.444 | 16.2 | 0.00 | 0.00 | 0.00 |
| 1004 | 103.646 | 31.399 | 15.9 | 103.617 | 31.373 | 15.9 | 103.596 | 31.393 | 16.2 | 103.624 | 31.419 | 16.2 | 0.00 | 0.00 | 0.00 |
| 1005 | 103.617 | 31.373 | 15.9 | 103.588 | 31.347 | 15.9 | 103.567 | 31.367 | 16.2 | 103.596 | 31.393 | 16.2 | 0.40 | 0.00 | 0.40 |
| 1006 | 103.588 | 31.347 | 15.9 | 103.560 | 31.321 | 15.9 | 103.538 | 31.341 | 16.2 | 103.567 | 31.367 | 16.2 | 1.01 | 0.00 | 1.01 |
| 1007 | 103.560 | 31.321 | 15.9 | 103.531 | 31.296 | 15.9 | 103.509 | 31.315 | 16.2 | 103.538 | 31.341 | 16.2 | 1.43 | 0.15 | 1.44 |
| 1008 | 103.531 | 31.296 | 15.9 | 103.502 | 31.270 | 15.9 | 103.480 | 31.289 | 16.2 | 103.509 | 31.315 | 16.2 | 1.57 | 0.68 | 1.71 |
| 1009 | 103.502 | 31.270 | 15.9 | 103.473 | 31.244 | 15.9 | 103.451 | 31.263 | 16.2 | 103.480 | 31.289 | 16.2 | 1.65 | 1.32 | 2.11 |
| 1010 | 103.473 | 31.244 | 15.9 | 103.444 | 31.218 | 15.9 | 103.422 | 31.237 | 16.2 | 103.451 | 31.263 | 16.2 | 1.83 | 1.78 | 2.55 |
| 1011 | 103.444 | 31.218 | 15.9 | 103.415 | 31.192 | 15.9 | 103.394 | 31.211 | 16.2 | 103.422 | 31.237 | 16.2 | 2.00 | 1.98 | 2.82 |
| 1012 | 103.415 | 31.192 | 15.9 | 103.386 | 31.166 | 15.9 | 103.365 | 31.185 | 16.2 | 103.394 | 31.211 | 16.2 | 1.92 | 1.95 | 2.74 |
| 1013 | 103.386 | 31.166 | 15.9 | 103.358 | 31.140 | 15.9 | 103.336 | 31.159 | 16.2 | 103.365 | 31.185 | 16.2 | 1.52 | 1.72 | 2.29 |
| 1014 | 103.358 | 31.140 | 15.9 | 103.329 | 31.114 | 15.9 | 103.307 | 31.133 | 16.2 | 103.336 | 31.159 | 16.2 | 0.98 | 1.30 | 1.63 |
| 1015 | 103.329 | 31.114 | 15.9 | 103.300 | 31.088 | 15.9 | 103.278 | 31.107 | 16.2 | 103.307 | 31.133 | 16.2 | 0.59 | 0.77 | 0.97 |
| 1016 | 103.300 | 31.088 | 15.9 | 103.271 | 31.062 | 15.9 | 103.249 | 31.081 | 16.2 | 103.278 | 31.107 | 16.2 | 0.61 | 0.27 | 0.66 |
| 1017 | 103.271 | 31.062 | 15.9 | 103.242 | 31.036 | 15.9 | 103.220 | 31.055 | 16.2 | 103.249 | 31.081 | 16.2 | 1.03 | 0.00 | 1.03 |
| 1018 | 103.242 | 31.036 | 15.9 | 103.213 | 31.010 | 15.9 | 103.191 | 31.030 | 16.2 | 103.220 | 31.055 | 16.2 | 1.56 | 0.22 | 1.57 |
| 1019 | 103.213 | 31.010 | 15.9 | 103.184 | 30.984 | 15.9 | 103.162 | 31.004 | 16.2 | 103.191 | 31.030 | 16.2 | 1.56 | 0.99 | 1.85 |
| 1020 | 103.184 | 30.984 | 15.9 | 103.155 | 30.959 | 15.9 | 103.134 | 30.978 | 16.2 | 103.162 | 31.004 | 16.2 | 0.79 | 1.80 | 1.96 |
| 1021 | 103.155 | 30.959 | 15.9 | 103.126 | 30.933 | 15.9 | 103.105 | 30.952 | 16.2 | 103.134 | 30.978 | 16.2 | 0.00 | 1.99 | 1.99 |
| 1022 | 103.126 | 30.933 | 15.9 | 103.098 | 30.907 | 15.9 | 103.076 | 30.926 | 16.2 | 103.105 | 30.952 | 16.2 | 0.00 | 1.42 | 1.42 |
| 1023 | 103.098 | 30.907 | 15.9 | 103.069 | 30.881 | 15.9 | 103.047 | 30.900 | 16.2 | 103.076 | 30.926 | 16.2 | 0.00 | 0.64 | 0.64 |
| 1024 | 103.069 | 30.881 | 15.9 | 103.040 | 30.855 | 15.9 | 103.018 | 30.874 | 16.2 | 103.047 | 30.900 | 16.2 | 0.00 | 0.50 | 0.50 |
| 1025 | 103.040 | 30.855 | 15.9 | 103.011 | 30.829 | 15.9 | 102.989 | 30.848 | 16.2 | 103.018 | 30.874 | 16.2 | 0.00 | 0.78 | 0.78 |
| 1026 | 103.011 | 30.829 | 15.9 | 102.982 | 30.803 | 15.9 | 102.960 | 30.822 | 16.2 | 102.989 | 30.848 | 16.2 | 0.00 | 0.00 | 0.00 |
| 1027 | 104.346 | 32.066 | 16.2 | 104.317 | 32.040 | 16.2 | 104.288 | 32.066 | 16.6 | 104.317 | 32.092 | 16.6 | 0.26 | 0.00 | 0.26 |
| 1028 | 104.317 | 32.040 | 16.2 | 104.288 | 32.014 | 16.2 | 104.259 | 32.040 | 16.6 | 104.288 | 32.066 | 16.6 | 0.65 | 1.21 | 1.38 |
| 1029 | 104.288 | 32.014 | 16.2 | 104.259 | 31.988 | 16.2 | 104.230 | 32.014 | 16.6 | 104.259 | 32.040 | 16.6 | 0.75 | 0.57 | 0.95 |
| 1030 | 104.259 | 31.988 | 16.2 | 104.230 | 31.962 | 16.2 | 104.201 | 31.988 | 16.6 | 104.230 | 32.014 | 16.6 | 0.75 | 0.00 | 0.75 |
| 1031 | 104.230 | 31.962 | 16.2 | 104.201 | 31.936 | 16.2 | 104.172 | 31.962 | 16.6 | 104.201 | 31.988 | 16.6 | 0.81 | 0.00 | 0.81 |

|      |         |        |      |         |        |      |         |        |      |         |        |      |      |      |      |
|------|---------|--------|------|---------|--------|------|---------|--------|------|---------|--------|------|------|------|------|
| 1032 | 104.201 | 31.936 | 16.2 | 104.172 | 31.910 | 16.2 | 104.143 | 31.936 | 16.6 | 104.172 | 31.962 | 16.6 | 0.84 | 0.00 | 0.84 |
| 1033 | 104.172 | 31.910 | 16.2 | 104.143 | 31.884 | 16.2 | 104.114 | 31.910 | 16.6 | 104.143 | 31.936 | 16.6 | 0.62 | 0.09 | 0.62 |
| 1034 | 104.143 | 31.884 | 16.2 | 104.115 | 31.858 | 16.2 | 104.085 | 31.884 | 16.6 | 104.114 | 31.910 | 16.6 | 0.22 | 0.53 | 0.57 |
| 1035 | 104.115 | 31.858 | 16.2 | 104.086 | 31.832 | 16.2 | 104.057 | 31.858 | 16.6 | 104.085 | 31.884 | 16.6 | 0.00 | 0.00 | 0.00 |
| 1036 | 104.086 | 31.832 | 16.2 | 104.057 | 31.807 | 16.2 | 104.028 | 31.832 | 16.6 | 104.057 | 31.858 | 16.6 | 0.00 | 0.00 | 0.00 |
| 1037 | 104.057 | 31.807 | 16.2 | 104.028 | 31.781 | 16.2 | 103.999 | 31.806 | 16.6 | 104.028 | 31.832 | 16.6 | 0.00 | 0.00 | 0.00 |
| 1038 | 104.028 | 31.781 | 16.2 | 103.999 | 31.755 | 16.2 | 103.970 | 31.781 | 16.6 | 103.999 | 31.806 | 16.6 | 0.00 | 0.00 | 0.00 |
| 1039 | 103.999 | 31.755 | 16.2 | 103.970 | 31.729 | 16.2 | 103.941 | 31.755 | 16.6 | 103.970 | 31.781 | 16.6 | 0.00 | 0.58 | 0.58 |
| 1040 | 103.970 | 31.729 | 16.2 | 103.941 | 31.703 | 16.2 | 103.912 | 31.729 | 16.6 | 103.941 | 31.755 | 16.6 | 0.07 | 0.11 | 0.13 |
| 1041 | 103.941 | 31.703 | 16.2 | 103.912 | 31.677 | 16.2 | 103.883 | 31.703 | 16.6 | 103.912 | 31.729 | 16.6 | 0.17 | 0.00 | 0.17 |
| 1042 | 103.912 | 31.677 | 16.2 | 103.883 | 31.651 | 16.2 | 103.854 | 31.677 | 16.6 | 103.883 | 31.703 | 16.6 | 0.19 | 0.00 | 0.19 |
| 1043 | 103.883 | 31.651 | 16.2 | 103.855 | 31.625 | 16.2 | 103.826 | 31.651 | 16.6 | 103.854 | 31.677 | 16.6 | 0.24 | 0.00 | 0.24 |
| 1044 | 103.855 | 31.625 | 16.2 | 103.826 | 31.599 | 16.2 | 103.797 | 31.625 | 16.6 | 103.826 | 31.651 | 16.6 | 0.41 | 0.00 | 0.41 |
| 1045 | 103.826 | 31.599 | 16.2 | 103.797 | 31.573 | 16.2 | 103.768 | 31.599 | 16.6 | 103.797 | 31.625 | 16.6 | 0.89 | 0.00 | 0.89 |
| 1046 | 103.797 | 31.573 | 16.2 | 103.768 | 31.547 | 16.2 | 103.739 | 31.573 | 16.6 | 103.768 | 31.599 | 16.6 | 1.60 | 0.00 | 1.60 |
| 1047 | 103.768 | 31.547 | 16.2 | 103.739 | 31.521 | 16.2 | 103.710 | 31.547 | 16.6 | 103.739 | 31.573 | 16.6 | 2.08 | 0.00 | 2.08 |
| 1048 | 103.739 | 31.521 | 16.2 | 103.710 | 31.495 | 16.2 | 103.681 | 31.521 | 16.6 | 103.710 | 31.547 | 16.6 | 1.85 | 0.00 | 1.85 |
| 1049 | 103.710 | 31.495 | 16.2 | 103.681 | 31.470 | 16.2 | 103.652 | 31.495 | 16.6 | 103.681 | 31.521 | 16.6 | 0.97 | 0.00 | 0.97 |
| 1050 | 103.681 | 31.470 | 16.2 | 103.653 | 31.444 | 16.2 | 103.623 | 31.469 | 16.6 | 103.652 | 31.495 | 16.6 | 0.12 | 0.00 | 0.12 |
| 1051 | 103.653 | 31.444 | 16.2 | 103.624 | 31.418 | 16.2 | 103.594 | 31.443 | 16.6 | 103.623 | 31.469 | 16.6 | 0.00 | 0.00 | 0.00 |
| 1052 | 103.624 | 31.418 | 16.2 | 103.595 | 31.392 | 16.2 | 103.566 | 31.418 | 16.6 | 103.594 | 31.443 | 16.6 | 0.00 | 0.00 | 0.00 |
| 1053 | 103.595 | 31.392 | 16.2 | 103.566 | 31.366 | 16.2 | 103.537 | 31.392 | 16.6 | 103.566 | 31.418 | 16.6 | 0.53 | 0.00 | 0.53 |
| 1054 | 103.566 | 31.366 | 16.2 | 103.537 | 31.340 | 16.2 | 103.508 | 31.366 | 16.6 | 103.537 | 31.392 | 16.6 | 1.27 | 0.00 | 1.27 |
| 1055 | 103.537 | 31.340 | 16.2 | 103.508 | 31.314 | 16.2 | 103.479 | 31.340 | 16.6 | 103.508 | 31.366 | 16.6 | 1.72 | 0.00 | 1.72 |
| 1056 | 103.508 | 31.314 | 16.2 | 103.479 | 31.288 | 16.2 | 103.450 | 31.314 | 16.6 | 103.479 | 31.340 | 16.6 | 1.77 | 0.45 | 1.83 |
| 1057 | 103.479 | 31.288 | 16.2 | 103.450 | 31.262 | 16.2 | 103.421 | 31.288 | 16.6 | 103.450 | 31.314 | 16.6 | 1.74 | 1.24 | 2.14 |
| 1058 | 103.450 | 31.262 | 16.2 | 103.421 | 31.236 | 16.2 | 103.392 | 31.262 | 16.6 | 103.421 | 31.288 | 16.6 | 1.85 | 2.02 | 2.73 |
| 1059 | 103.421 | 31.236 | 16.2 | 103.393 | 31.210 | 16.2 | 103.364 | 31.236 | 16.6 | 103.392 | 31.262 | 16.6 | 1.99 | 2.55 | 3.23 |
| 1060 | 103.393 | 31.210 | 16.2 | 103.364 | 31.184 | 16.2 | 103.335 | 31.210 | 16.6 | 103.364 | 31.236 | 16.6 | 1.88 | 2.76 | 3.34 |
| 1061 | 103.364 | 31.184 | 16.2 | 103.335 | 31.158 | 16.2 | 103.306 | 31.184 | 16.6 | 103.335 | 31.210 | 16.6 | 1.41 | 2.66 | 3.01 |
| 1062 | 103.335 | 31.158 | 16.2 | 103.306 | 31.133 | 16.2 | 103.277 | 31.158 | 16.6 | 103.306 | 31.184 | 16.6 | 0.77 | 2.25 | 2.38 |
| 1063 | 103.306 | 31.133 | 16.2 | 103.277 | 31.107 | 16.2 | 103.248 | 31.132 | 16.6 | 103.277 | 31.158 | 16.6 | 0.27 | 1.60 | 1.62 |
| 1064 | 103.277 | 31.107 | 16.2 | 103.248 | 31.081 | 16.2 | 103.219 | 31.106 | 16.6 | 103.248 | 31.132 | 16.6 | 0.17 | 0.86 | 0.88 |
| 1065 | 103.248 | 31.081 | 16.2 | 103.219 | 31.055 | 16.2 | 103.190 | 31.080 | 16.6 | 103.219 | 31.106 | 16.6 | 0.42 | 0.26 | 0.49 |
| 1066 | 103.219 | 31.055 | 16.2 | 103.191 | 31.029 | 16.2 | 103.161 | 31.055 | 16.6 | 103.190 | 31.080 | 16.6 | 0.88 | 0.04 | 0.88 |
| 1067 | 103.191 | 31.029 | 16.2 | 103.162 | 31.003 | 16.2 | 103.132 | 31.029 | 16.6 | 103.161 | 31.054 | 16.6 | 1.01 | 0.28 | 1.04 |
| 1068 | 103.162 | 31.003 | 16.2 | 103.133 | 30.977 | 16.2 | 103.104 | 31.003 | 16.6 | 103.132 | 31.029 | 16.6 | 0.49 | 0.64 | 0.81 |
| 1069 | 103.133 | 30.977 | 16.2 | 103.104 | 30.951 | 16.2 | 103.075 | 30.977 | 16.6 | 103.104 | 31.003 | 16.6 | 0.00 | 0.71 | 0.71 |
| 1070 | 103.104 | 30.951 | 16.2 | 103.075 | 30.925 | 16.2 | 103.046 | 30.951 | 16.6 | 103.075 | 30.977 | 16.6 | 0.00 | 0.41 | 0.41 |
| 1071 | 103.075 | 30.925 | 16.2 | 103.046 | 30.899 | 16.2 | 103.017 | 30.925 | 16.6 | 103.046 | 30.951 | 16.6 | 0.00 | 0.03 | 0.03 |
| 1072 | 103.046 | 30.899 | 16.2 | 103.017 | 30.873 | 16.2 | 102.988 | 30.899 | 16.6 | 103.017 | 30.925 | 16.6 | 0.00 | 0.00 | 0.00 |
| 1073 | 103.017 | 30.873 | 16.2 | 102.988 | 30.847 | 16.2 | 102.959 | 30.873 | 16.6 | 102.988 | 30.899 | 16.6 | 0.00 | 0.36 | 0.36 |
| 1074 | 102.988 | 30.847 | 16.2 | 102.960 | 30.821 | 16.2 | 102.930 | 30.847 | 16.6 | 102.959 | 30.873 | 16.6 | 0.00 | 0.00 | 0.00 |
| 1075 | 104.315 | 32.091 | 16.6 | 104.286 | 32.065 | 16.6 | 104.257 | 32.091 | 17.0 | 104.286 | 32.117 | 17.0 | 0.25 | 0.00 | 0.25 |
| 1076 | 104.286 | 32.065 | 16.6 | 104.257 | 32.039 | 16.6 | 104.228 | 32.065 | 17.0 | 104.257 | 32.091 | 17.0 | 0.71 | 1.27 | 1.45 |

|      |         |        |      |         |        |      |         |        |      |         |        |      |      |      |      |
|------|---------|--------|------|---------|--------|------|---------|--------|------|---------|--------|------|------|------|------|
| 1077 | 104.257 | 32.039 | 16.6 | 104.229 | 32.013 | 16.6 | 104.200 | 32.039 | 17.0 | 104.228 | 32.065 | 17.0 | 0.89 | 0.65 | 1.10 |
| 1078 | 104.229 | 32.013 | 16.6 | 104.200 | 31.987 | 16.6 | 104.171 | 32.013 | 17.0 | 104.200 | 32.039 | 17.0 | 0.91 | 0.04 | 0.91 |
| 1079 | 104.200 | 31.987 | 16.6 | 104.171 | 31.961 | 16.6 | 104.142 | 31.987 | 17.0 | 104.171 | 32.013 | 17.0 | 0.93 | 0.00 | 0.93 |
| 1080 | 104.171 | 31.961 | 16.6 | 104.142 | 31.935 | 16.6 | 104.113 | 31.961 | 17.0 | 104.142 | 31.987 | 17.0 | 0.89 | 0.00 | 0.89 |
| 1081 | 104.142 | 31.935 | 16.6 | 104.113 | 31.909 | 16.6 | 104.084 | 31.935 | 17.0 | 104.113 | 31.961 | 17.0 | 0.64 | 0.06 | 0.64 |
| 1082 | 104.113 | 31.909 | 16.6 | 104.084 | 31.883 | 16.6 | 104.055 | 31.909 | 17.0 | 104.084 | 31.935 | 17.0 | 0.24 | 0.49 | 0.55 |
| 1083 | 104.084 | 31.883 | 16.6 | 104.055 | 31.857 | 16.6 | 104.026 | 31.883 | 17.0 | 104.055 | 31.909 | 17.0 | 0.00 | 0.00 | 0.00 |
| 1084 | 104.055 | 31.857 | 16.6 | 104.026 | 31.831 | 16.6 | 103.997 | 31.857 | 17.0 | 104.026 | 31.883 | 17.0 | 0.00 | 0.00 | 0.00 |
| 1085 | 104.026 | 31.831 | 16.6 | 103.998 | 31.805 | 16.6 | 103.969 | 31.831 | 17.0 | 103.997 | 31.857 | 17.0 | 0.00 | 0.00 | 0.00 |
| 1086 | 103.998 | 31.805 | 16.6 | 103.969 | 31.779 | 16.6 | 103.940 | 31.805 | 17.0 | 103.969 | 31.831 | 17.0 | 0.14 | 0.00 | 0.14 |
| 1087 | 103.969 | 31.779 | 16.6 | 103.940 | 31.754 | 16.6 | 103.911 | 31.779 | 17.0 | 103.940 | 31.805 | 17.0 | 0.38 | 0.64 | 0.74 |
| 1088 | 103.940 | 31.754 | 16.6 | 103.911 | 31.728 | 16.6 | 103.882 | 31.753 | 17.0 | 103.911 | 31.779 | 17.0 | 0.54 | 0.16 | 0.57 |
| 1089 | 103.911 | 31.728 | 16.6 | 103.882 | 31.702 | 16.6 | 103.853 | 31.727 | 17.0 | 103.882 | 31.753 | 17.0 | 0.43 | 0.00 | 0.43 |
| 1090 | 103.882 | 31.702 | 16.6 | 103.853 | 31.676 | 16.6 | 103.824 | 31.702 | 17.0 | 103.853 | 31.727 | 17.0 | 0.13 | 0.00 | 0.13 |
| 1091 | 103.853 | 31.676 | 16.6 | 103.824 | 31.650 | 16.6 | 103.795 | 31.676 | 17.0 | 103.824 | 31.702 | 17.0 | 0.00 | 0.00 | 0.00 |
| 1092 | 103.824 | 31.650 | 16.6 | 103.795 | 31.624 | 16.6 | 103.766 | 31.650 | 17.0 | 103.795 | 31.676 | 17.0 | 0.00 | 0.00 | 0.00 |
| 1093 | 103.795 | 31.624 | 16.6 | 103.767 | 31.598 | 16.6 | 103.737 | 31.624 | 17.0 | 103.766 | 31.650 | 17.0 | 0.41 | 0.00 | 0.41 |
| 1094 | 103.767 | 31.598 | 16.6 | 103.738 | 31.572 | 16.6 | 103.709 | 31.598 | 17.0 | 103.737 | 31.624 | 17.0 | 1.25 | 0.00 | 1.25 |
| 1095 | 103.738 | 31.572 | 16.6 | 103.709 | 31.546 | 16.6 | 103.680 | 31.572 | 17.0 | 103.709 | 31.598 | 17.0 | 1.96 | 0.00 | 1.96 |
| 1096 | 103.709 | 31.546 | 16.6 | 103.680 | 31.520 | 16.6 | 103.651 | 31.546 | 17.0 | 103.680 | 31.572 | 17.0 | 1.92 | 0.00 | 1.92 |
| 1097 | 103.680 | 31.520 | 16.6 | 103.651 | 31.494 | 16.6 | 103.622 | 31.520 | 17.0 | 103.651 | 31.546 | 17.0 | 1.07 | 0.00 | 1.07 |
| 1098 | 103.651 | 31.494 | 16.6 | 103.622 | 31.468 | 16.6 | 103.593 | 31.494 | 17.0 | 103.622 | 31.520 | 17.0 | 0.15 | 0.00 | 0.15 |
| 1099 | 103.622 | 31.468 | 16.6 | 103.593 | 31.442 | 16.6 | 103.564 | 31.468 | 17.0 | 103.593 | 31.494 | 17.0 | 0.00 | 0.00 | 0.00 |
| 1100 | 103.593 | 31.442 | 16.6 | 103.564 | 31.416 | 16.6 | 103.535 | 31.442 | 17.0 | 103.564 | 31.468 | 17.0 | 0.00 | 0.00 | 0.00 |
| 1101 | 103.564 | 31.416 | 16.6 | 103.536 | 31.390 | 16.6 | 103.507 | 31.416 | 17.0 | 103.535 | 31.442 | 17.0 | 0.53 | 0.00 | 0.53 |
| 1102 | 103.536 | 31.390 | 16.6 | 103.507 | 31.365 | 16.6 | 103.478 | 31.390 | 17.0 | 103.507 | 31.416 | 17.0 | 1.25 | 0.00 | 1.25 |
| 1103 | 103.507 | 31.365 | 16.6 | 103.478 | 31.339 | 16.6 | 103.449 | 31.364 | 17.0 | 103.478 | 31.390 | 17.0 | 1.62 | 0.02 | 1.62 |
| 1104 | 103.478 | 31.339 | 16.6 | 103.449 | 31.313 | 16.6 | 103.420 | 31.338 | 17.0 | 103.449 | 31.364 | 17.0 | 1.58 | 0.54 | 1.67 |
| 1105 | 103.449 | 31.313 | 16.6 | 103.420 | 31.287 | 16.6 | 103.391 | 31.312 | 17.0 | 103.420 | 31.338 | 17.0 | 1.45 | 1.41 | 2.03 |
| 1106 | 103.420 | 31.287 | 16.6 | 103.391 | 31.261 | 16.6 | 103.362 | 31.287 | 17.0 | 103.391 | 31.312 | 17.0 | 1.48 | 2.32 | 2.75 |
| 1107 | 103.391 | 31.261 | 16.6 | 103.362 | 31.235 | 16.6 | 103.333 | 31.261 | 17.0 | 103.362 | 31.287 | 17.0 | 1.57 | 2.99 | 3.38 |
| 1108 | 103.362 | 31.235 | 16.6 | 103.333 | 31.209 | 16.6 | 103.304 | 31.235 | 17.0 | 103.333 | 31.261 | 17.0 | 1.47 | 3.34 | 3.65 |
| 1109 | 103.333 | 31.209 | 16.6 | 103.305 | 31.183 | 16.6 | 103.275 | 31.209 | 17.0 | 103.304 | 31.235 | 17.0 | 1.05 | 3.34 | 3.50 |
| 1110 | 103.305 | 31.183 | 16.6 | 103.276 | 31.157 | 16.6 | 103.247 | 31.183 | 17.0 | 103.275 | 31.209 | 17.0 | 0.46 | 3.03 | 3.06 |
| 1111 | 103.276 | 31.157 | 16.6 | 103.247 | 31.131 | 16.6 | 103.218 | 31.157 | 17.0 | 103.247 | 31.183 | 17.0 | 0.05 | 2.43 | 2.44 |
| 1112 | 103.247 | 31.131 | 16.6 | 103.218 | 31.105 | 16.6 | 103.189 | 31.131 | 17.0 | 103.218 | 31.157 | 17.0 | 0.00 | 1.65 | 1.65 |
| 1113 | 103.218 | 31.105 | 16.6 | 103.189 | 31.079 | 16.6 | 103.160 | 31.105 | 17.0 | 103.189 | 31.131 | 17.0 | 0.02 | 0.85 | 0.85 |
| 1114 | 103.189 | 31.079 | 16.6 | 103.160 | 31.053 | 16.6 | 103.131 | 31.079 | 17.0 | 103.160 | 31.105 | 17.0 | 0.26 | 0.23 | 0.34 |
| 1115 | 103.160 | 31.053 | 16.6 | 103.131 | 31.027 | 16.6 | 103.102 | 31.053 | 17.0 | 103.131 | 31.079 | 17.0 | 0.41 | 0.00 | 0.41 |
| 1116 | 103.131 | 31.027 | 16.6 | 103.102 | 31.002 | 16.6 | 103.073 | 31.027 | 17.0 | 103.102 | 31.053 | 17.0 | 0.17 | 0.00 | 0.17 |
| 1117 | 103.102 | 31.002 | 16.6 | 103.074 | 30.976 | 16.6 | 103.044 | 31.001 | 17.0 | 103.073 | 31.027 | 17.0 | 0.00 | 0.00 | 0.00 |
| 1118 | 103.074 | 30.976 | 16.6 | 103.045 | 30.950 | 16.6 | 103.016 | 30.975 | 17.0 | 103.044 | 31.001 | 17.0 | 0.00 | 0.00 | 0.00 |
| 1119 | 103.045 | 30.950 | 16.6 | 103.016 | 30.924 | 16.6 | 102.987 | 30.949 | 17.0 | 103.016 | 30.975 | 17.0 | 0.00 | 0.00 | 0.00 |
| 1120 | 103.016 | 30.924 | 16.6 | 102.987 | 30.898 | 16.6 | 102.958 | 30.923 | 17.0 | 102.987 | 30.949 | 17.0 | 0.00 | 0.00 | 0.00 |
| 1121 | 102.987 | 30.898 | 16.6 | 102.958 | 30.872 | 16.6 | 102.929 | 30.898 | 17.0 | 102.958 | 30.923 | 17.0 | 0.00 | 0.11 | 0.11 |

|      |         |        |      |         |        |      |         |        |      |         |        |      |      |      |      |
|------|---------|--------|------|---------|--------|------|---------|--------|------|---------|--------|------|------|------|------|
| 1122 | 102.958 | 30.872 | 16.6 | 102.929 | 30.846 | 16.6 | 102.900 | 30.872 | 17.0 | 102.929 | 30.898 | 17.0 | 0.00 | 0.00 | 0.00 |
| 1123 | 104.285 | 32.116 | 17.0 | 104.256 | 32.090 | 17.0 | 104.227 | 32.115 | 17.4 | 104.256 | 32.142 | 17.4 | 0.21 | 0.00 | 0.21 |
| 1124 | 104.256 | 32.090 | 17.0 | 104.227 | 32.064 | 17.0 | 104.198 | 32.090 | 17.4 | 104.227 | 32.115 | 17.4 | 0.67 | 1.34 | 1.50 |
| 1125 | 104.227 | 32.064 | 17.0 | 104.198 | 32.038 | 17.0 | 104.169 | 32.064 | 17.4 | 104.198 | 32.090 | 17.4 | 0.86 | 0.76 | 1.15 |
| 1126 | 104.198 | 32.038 | 17.0 | 104.169 | 32.012 | 17.0 | 104.140 | 32.038 | 17.4 | 104.169 | 32.064 | 17.4 | 0.87 | 0.10 | 0.87 |
| 1127 | 104.169 | 32.012 | 17.0 | 104.141 | 31.986 | 17.0 | 104.112 | 32.012 | 17.4 | 104.140 | 32.038 | 17.4 | 0.82 | 0.00 | 0.82 |
| 1128 | 104.141 | 31.986 | 17.0 | 104.112 | 31.960 | 17.0 | 104.083 | 31.986 | 17.4 | 104.112 | 32.012 | 17.4 | 0.71 | 0.00 | 0.71 |
| 1129 | 104.112 | 31.960 | 17.0 | 104.083 | 31.934 | 17.0 | 104.054 | 31.960 | 17.4 | 104.083 | 31.986 | 17.4 | 0.47 | 0.07 | 0.48 |
| 1130 | 104.083 | 31.934 | 17.0 | 104.054 | 31.908 | 17.0 | 104.025 | 31.934 | 17.4 | 104.054 | 31.960 | 17.4 | 0.17 | 0.51 | 0.53 |
| 1131 | 104.054 | 31.908 | 17.0 | 104.025 | 31.882 | 17.0 | 103.996 | 31.908 | 17.4 | 104.025 | 31.934 | 17.4 | 0.00 | 0.00 | 0.00 |
| 1132 | 104.025 | 31.882 | 17.0 | 103.996 | 31.856 | 17.0 | 103.967 | 31.882 | 17.4 | 103.996 | 31.908 | 17.4 | 0.00 | 0.00 | 0.00 |
| 1133 | 103.996 | 31.856 | 17.0 | 103.967 | 31.830 | 17.0 | 103.938 | 31.856 | 17.4 | 103.967 | 31.882 | 17.4 | 0.19 | 0.00 | 0.19 |
| 1134 | 103.967 | 31.830 | 17.0 | 103.938 | 31.804 | 17.0 | 103.909 | 31.830 | 17.4 | 103.938 | 31.856 | 17.4 | 0.64 | 0.00 | 0.64 |
| 1135 | 103.938 | 31.804 | 17.0 | 103.909 | 31.778 | 17.0 | 103.880 | 31.804 | 17.4 | 103.909 | 31.830 | 17.4 | 1.14 | 0.53 | 1.25 |
| 1136 | 103.909 | 31.778 | 17.0 | 103.881 | 31.752 | 17.0 | 103.852 | 31.778 | 17.4 | 103.880 | 31.804 | 17.4 | 1.31 | 0.07 | 1.31 |
| 1137 | 103.881 | 31.752 | 17.0 | 103.852 | 31.727 | 17.0 | 103.823 | 31.752 | 17.4 | 103.852 | 31.778 | 17.4 | 0.94 | 0.00 | 0.94 |
| 1138 | 103.852 | 31.727 | 17.0 | 103.823 | 31.701 | 17.0 | 103.794 | 31.726 | 17.4 | 103.823 | 31.752 | 17.4 | 0.31 | 0.00 | 0.31 |
| 1139 | 103.823 | 31.701 | 17.0 | 103.794 | 31.675 | 17.0 | 103.765 | 31.700 | 17.4 | 103.794 | 31.726 | 17.4 | 0.00 | 0.00 | 0.00 |
| 1140 | 103.794 | 31.675 | 17.0 | 103.765 | 31.649 | 17.0 | 103.736 | 31.674 | 17.4 | 103.765 | 31.700 | 17.4 | 0.00 | 0.00 | 0.00 |
| 1141 | 103.765 | 31.649 | 17.0 | 103.736 | 31.623 | 17.0 | 103.707 | 31.648 | 17.4 | 103.736 | 31.674 | 17.4 | 0.15 | 0.00 | 0.15 |
| 1142 | 103.736 | 31.623 | 17.0 | 103.707 | 31.597 | 17.0 | 103.678 | 31.623 | 17.4 | 103.707 | 31.648 | 17.4 | 0.90 | 0.00 | 0.90 |
| 1143 | 103.707 | 31.597 | 17.0 | 103.678 | 31.571 | 17.0 | 103.649 | 31.597 | 17.4 | 103.678 | 31.623 | 17.4 | 1.67 | 0.00 | 1.67 |
| 1144 | 103.678 | 31.571 | 17.0 | 103.650 | 31.545 | 17.0 | 103.621 | 31.571 | 17.4 | 103.649 | 31.597 | 17.4 | 1.75 | 0.00 | 1.75 |
| 1145 | 103.650 | 31.545 | 17.0 | 103.621 | 31.519 | 17.0 | 103.592 | 31.545 | 17.4 | 103.621 | 31.571 | 17.4 | 1.00 | 0.00 | 1.00 |
| 1146 | 103.621 | 31.519 | 17.0 | 103.592 | 31.493 | 17.0 | 103.563 | 31.519 | 17.4 | 103.592 | 31.545 | 17.4 | 0.14 | 0.00 | 0.14 |
| 1147 | 103.592 | 31.493 | 17.0 | 103.563 | 31.467 | 17.0 | 103.534 | 31.493 | 17.4 | 103.563 | 31.519 | 17.4 | 0.00 | 0.00 | 0.00 |
| 1148 | 103.563 | 31.467 | 17.0 | 103.534 | 31.441 | 17.0 | 103.505 | 31.467 | 17.4 | 103.534 | 31.493 | 17.4 | 0.00 | 0.00 | 0.00 |
| 1149 | 103.534 | 31.441 | 17.0 | 103.505 | 31.415 | 17.0 | 103.476 | 31.441 | 17.4 | 103.505 | 31.467 | 17.4 | 0.37 | 0.00 | 0.37 |
| 1150 | 103.505 | 31.415 | 17.0 | 103.476 | 31.389 | 17.0 | 103.447 | 31.415 | 17.4 | 103.476 | 31.441 | 17.4 | 0.91 | 0.00 | 0.91 |
| 1151 | 103.476 | 31.389 | 17.0 | 103.448 | 31.363 | 17.0 | 103.418 | 31.389 | 17.4 | 103.447 | 31.415 | 17.4 | 1.15 | 0.16 | 1.17 |
| 1152 | 103.448 | 31.363 | 17.0 | 103.419 | 31.337 | 17.0 | 103.390 | 31.363 | 17.4 | 103.418 | 31.389 | 17.4 | 1.05 | 0.69 | 1.26 |
| 1153 | 103.419 | 31.337 | 17.0 | 103.390 | 31.311 | 17.0 | 103.361 | 31.337 | 17.4 | 103.390 | 31.363 | 17.4 | 0.89 | 1.49 | 1.73 |
| 1154 | 103.390 | 31.311 | 17.0 | 103.361 | 31.285 | 17.0 | 103.332 | 31.311 | 17.4 | 103.361 | 31.337 | 17.4 | 0.87 | 2.30 | 2.46 |
| 1155 | 103.361 | 31.285 | 17.0 | 103.332 | 31.260 | 17.0 | 103.303 | 31.285 | 17.4 | 103.332 | 31.311 | 17.4 | 0.94 | 2.92 | 3.07 |
| 1156 | 103.332 | 31.260 | 17.0 | 103.303 | 31.234 | 17.0 | 103.274 | 31.259 | 17.4 | 103.303 | 31.285 | 17.4 | 0.89 | 3.29 | 3.41 |
| 1157 | 103.303 | 31.234 | 17.0 | 103.274 | 31.208 | 17.0 | 103.245 | 31.233 | 17.4 | 103.274 | 31.259 | 17.4 | 0.60 | 3.41 | 3.46 |
| 1158 | 103.274 | 31.208 | 17.0 | 103.245 | 31.182 | 17.0 | 103.216 | 31.207 | 17.4 | 103.245 | 31.233 | 17.4 | 0.21 | 3.29 | 3.30 |
| 1159 | 103.245 | 31.182 | 17.0 | 103.216 | 31.156 | 17.0 | 103.188 | 31.181 | 17.4 | 103.216 | 31.207 | 17.4 | 0.00 | 2.92 | 2.92 |
| 1160 | 103.216 | 31.156 | 17.0 | 103.188 | 31.130 | 17.0 | 103.159 | 31.155 | 17.4 | 103.188 | 31.181 | 17.4 | 0.00 | 2.30 | 2.30 |
| 1161 | 103.188 | 31.130 | 17.0 | 103.159 | 31.104 | 17.0 | 103.130 | 31.130 | 17.4 | 103.159 | 31.155 | 17.4 | 0.00 | 1.48 | 1.48 |
| 1162 | 103.159 | 31.104 | 17.0 | 103.130 | 31.078 | 17.0 | 103.101 | 31.104 | 17.4 | 103.130 | 31.130 | 17.4 | 0.00 | 0.63 | 0.63 |
| 1163 | 103.130 | 31.078 | 17.0 | 103.101 | 31.052 | 17.0 | 103.072 | 31.078 | 17.4 | 103.101 | 31.104 | 17.4 | 0.06 | 0.05 | 0.08 |
| 1164 | 103.101 | 31.052 | 17.0 | 103.072 | 31.026 | 17.0 | 103.043 | 31.052 | 17.4 | 103.072 | 31.078 | 17.4 | 0.00 | 0.00 | 0.00 |
| 1165 | 103.072 | 31.026 | 17.0 | 103.043 | 31.000 | 17.0 | 103.014 | 31.026 | 17.4 | 103.043 | 31.052 | 17.4 | 0.00 | 0.00 | 0.00 |
| 1166 | 103.043 | 31.000 | 17.0 | 103.014 | 30.974 | 17.0 | 102.985 | 31.000 | 17.4 | 103.014 | 31.026 | 17.4 | 0.00 | 0.00 | 0.00 |



|      |         |        |      |         |        |      |         |        |      |         |        |      |      |      |      |
|------|---------|--------|------|---------|--------|------|---------|--------|------|---------|--------|------|------|------|------|
| 1167 | 103.014 | 30.974 | 17.0 | 102.986 | 30.948 | 17.0 | 102.957 | 30.974 | 17.4 | 102.985 | 31.000 | 17.4 | 0.00 | 0.00 | 0.00 |
| 1168 | 102.986 | 30.948 | 17.0 | 102.957 | 30.922 | 17.0 | 102.928 | 30.948 | 17.4 | 102.957 | 30.974 | 17.4 | 0.00 | 0.00 | 0.00 |
| 1169 | 102.957 | 30.922 | 17.0 | 102.928 | 30.896 | 17.0 | 102.899 | 30.922 | 17.4 | 102.928 | 30.948 | 17.4 | 0.00 | 0.00 | 0.00 |
| 1170 | 102.928 | 30.896 | 17.0 | 102.899 | 30.870 | 17.0 | 102.870 | 30.896 | 17.4 | 102.899 | 30.922 | 17.4 | 0.00 | 0.00 | 0.00 |
| 1171 | 104.254 | 32.140 | 17.4 | 104.226 | 32.114 | 17.4 | 104.197 | 32.140 | 17.9 | 104.225 | 32.166 | 17.9 | 0.16 | 0.00 | 0.16 |
| 1172 | 104.226 | 32.114 | 17.4 | 104.197 | 32.089 | 17.4 | 104.168 | 32.114 | 17.9 | 104.197 | 32.140 | 17.9 | 0.55 | 1.40 | 1.51 |
| 1173 | 104.197 | 32.089 | 17.4 | 104.168 | 32.063 | 17.4 | 104.139 | 32.089 | 17.9 | 104.168 | 32.114 | 17.9 | 0.70 | 0.84 | 1.10 |
| 1174 | 104.168 | 32.063 | 17.4 | 104.139 | 32.037 | 17.4 | 104.110 | 32.062 | 17.9 | 104.139 | 32.089 | 17.9 | 0.66 | 0.15 | 0.68 |
| 1175 | 104.139 | 32.037 | 17.4 | 104.110 | 32.011 | 17.4 | 104.081 | 32.037 | 17.9 | 104.110 | 32.062 | 17.9 | 0.55 | 0.00 | 0.55 |
| 1176 | 104.110 | 32.011 | 17.4 | 104.081 | 31.985 | 17.4 | 104.052 | 32.011 | 17.9 | 104.081 | 32.037 | 17.9 | 0.41 | 0.00 | 0.41 |
| 1177 | 104.081 | 31.985 | 17.4 | 104.052 | 31.959 | 17.4 | 104.023 | 31.985 | 17.9 | 104.052 | 32.011 | 17.9 | 0.24 | 0.11 | 0.26 |
| 1178 | 104.052 | 31.959 | 17.4 | 104.023 | 31.933 | 17.4 | 103.995 | 31.959 | 17.9 | 104.023 | 31.985 | 17.9 | 0.06 | 0.55 | 0.55 |
| 1179 | 104.023 | 31.933 | 17.4 | 103.995 | 31.907 | 17.4 | 103.966 | 31.933 | 17.9 | 103.995 | 31.959 | 17.9 | 0.00 | 0.00 | 0.00 |
| 1180 | 103.995 | 31.907 | 17.4 | 103.966 | 31.881 | 17.4 | 103.937 | 31.907 | 17.9 | 103.966 | 31.933 | 17.9 | 0.11 | 0.00 | 0.11 |
| 1181 | 103.966 | 31.881 | 17.4 | 103.937 | 31.855 | 17.4 | 103.908 | 31.881 | 17.9 | 103.937 | 31.907 | 17.9 | 0.54 | 0.00 | 0.54 |
| 1182 | 103.937 | 31.855 | 17.4 | 103.908 | 31.829 | 17.4 | 103.879 | 31.855 | 17.9 | 103.908 | 31.881 | 17.9 | 1.23 | 0.00 | 1.23 |
| 1183 | 103.908 | 31.829 | 17.4 | 103.879 | 31.803 | 17.4 | 103.850 | 31.829 | 17.9 | 103.879 | 31.855 | 17.9 | 1.85 | 0.36 | 1.89 |
| 1184 | 103.879 | 31.803 | 17.4 | 103.850 | 31.777 | 17.4 | 103.821 | 31.803 | 17.9 | 103.850 | 31.829 | 17.9 | 1.97 | 0.00 | 1.97 |
| 1185 | 103.850 | 31.777 | 17.4 | 103.821 | 31.751 | 17.4 | 103.792 | 31.777 | 17.9 | 103.821 | 31.803 | 17.9 | 1.42 | 0.00 | 1.42 |
| 1186 | 103.821 | 31.751 | 17.4 | 103.793 | 31.725 | 17.4 | 103.763 | 31.751 | 17.9 | 103.792 | 31.777 | 17.9 | 0.55 | 0.00 | 0.55 |
| 1187 | 103.793 | 31.725 | 17.4 | 103.764 | 31.699 | 17.4 | 103.735 | 31.725 | 17.9 | 103.763 | 31.751 | 17.9 | 0.00 | 0.00 | 0.00 |
| 1188 | 103.764 | 31.699 | 17.4 | 103.735 | 31.673 | 17.4 | 103.706 | 31.699 | 17.9 | 103.735 | 31.725 | 17.9 | 0.00 | 0.00 | 0.00 |
| 1189 | 103.735 | 31.673 | 17.4 | 103.706 | 31.648 | 17.4 | 103.677 | 31.673 | 17.9 | 103.706 | 31.699 | 17.9 | 0.02 | 0.00 | 0.02 |
| 1190 | 103.706 | 31.648 | 17.4 | 103.677 | 31.622 | 17.4 | 103.648 | 31.647 | 17.9 | 103.677 | 31.673 | 17.9 | 0.61 | 0.00 | 0.61 |
| 1191 | 103.677 | 31.622 | 17.4 | 103.648 | 31.596 | 17.4 | 103.619 | 31.621 | 17.9 | 103.648 | 31.647 | 17.9 | 1.29 | 0.00 | 1.29 |
| 1192 | 103.648 | 31.596 | 17.4 | 103.619 | 31.570 | 17.4 | 103.590 | 31.595 | 17.9 | 103.619 | 31.621 | 17.9 | 1.40 | 0.00 | 1.40 |
| 1193 | 103.619 | 31.570 | 17.4 | 103.590 | 31.544 | 17.4 | 103.561 | 31.569 | 17.9 | 103.590 | 31.595 | 17.9 | 0.79 | 0.00 | 0.79 |
| 1194 | 103.590 | 31.544 | 17.4 | 103.562 | 31.518 | 17.4 | 103.532 | 31.544 | 17.9 | 103.561 | 31.569 | 17.9 | 0.08 | 0.00 | 0.08 |
| 1195 | 103.562 | 31.518 | 17.4 | 103.533 | 31.492 | 17.4 | 103.504 | 31.517 | 17.9 | 103.532 | 31.544 | 17.9 | 0.00 | 0.00 | 0.00 |
| 1196 | 103.533 | 31.492 | 17.4 | 103.504 | 31.466 | 17.4 | 103.475 | 31.492 | 17.9 | 103.504 | 31.517 | 17.9 | 0.00 | 0.00 | 0.00 |
| 1197 | 103.504 | 31.466 | 17.4 | 103.475 | 31.440 | 17.4 | 103.446 | 31.466 | 17.9 | 103.475 | 31.492 | 17.9 | 0.14 | 0.00 | 0.14 |
| 1198 | 103.475 | 31.440 | 17.4 | 103.446 | 31.414 | 17.4 | 103.417 | 31.440 | 17.9 | 103.446 | 31.466 | 17.9 | 0.42 | 0.06 | 0.43 |
| 1199 | 103.446 | 31.414 | 17.4 | 103.417 | 31.388 | 17.4 | 103.388 | 31.414 | 17.9 | 103.417 | 31.440 | 17.9 | 0.54 | 0.29 | 0.61 |
| 1200 | 103.417 | 31.388 | 17.4 | 103.388 | 31.362 | 17.4 | 103.359 | 31.388 | 17.9 | 103.388 | 31.414 | 17.9 | 0.43 | 0.72 | 0.84 |
| 1201 | 103.388 | 31.362 | 17.4 | 103.359 | 31.336 | 17.4 | 103.330 | 31.362 | 17.9 | 103.359 | 31.388 | 17.9 | 0.30 | 1.27 | 1.31 |
| 1202 | 103.359 | 31.336 | 17.4 | 103.331 | 31.310 | 17.4 | 103.302 | 31.336 | 17.9 | 103.330 | 31.362 | 17.9 | 0.29 | 1.80 | 1.82 |
| 1203 | 103.331 | 31.310 | 17.4 | 103.302 | 31.284 | 17.4 | 103.273 | 31.310 | 17.9 | 103.302 | 31.336 | 17.9 | 0.35 | 2.23 | 2.26 |
| 1204 | 103.302 | 31.284 | 17.4 | 103.273 | 31.258 | 17.4 | 103.244 | 31.284 | 17.9 | 103.273 | 31.310 | 17.9 | 0.37 | 2.55 | 2.57 |
| 1205 | 103.273 | 31.258 | 17.4 | 103.244 | 31.232 | 17.4 | 103.215 | 31.258 | 17.9 | 103.244 | 31.284 | 17.9 | 0.25 | 2.78 | 2.79 |
| 1206 | 103.244 | 31.232 | 17.4 | 103.215 | 31.206 | 17.4 | 103.186 | 31.232 | 17.9 | 103.215 | 31.258 | 17.9 | 0.06 | 2.92 | 2.92 |
| 1207 | 103.215 | 31.206 | 17.4 | 103.186 | 31.180 | 17.4 | 103.157 | 31.206 | 17.9 | 103.186 | 31.232 | 17.9 | 0.00 | 2.87 | 2.87 |
| 1208 | 103.186 | 31.180 | 17.4 | 103.157 | 31.154 | 17.4 | 103.128 | 31.180 | 17.9 | 103.157 | 31.206 | 17.9 | 0.00 | 2.53 | 2.53 |
| 1209 | 103.157 | 31.154 | 17.4 | 103.129 | 31.128 | 17.4 | 103.099 | 31.154 | 17.9 | 103.128 | 31.180 | 17.9 | 0.00 | 1.85 | 1.85 |
| 1210 | 103.129 | 31.128 | 17.4 | 103.100 | 31.103 | 17.4 | 103.070 | 31.128 | 17.9 | 103.099 | 31.154 | 17.9 | 0.00 | 0.96 | 0.96 |
| 1211 | 103.100 | 31.103 | 17.4 | 103.071 | 31.077 | 17.4 | 103.042 | 31.102 | 17.9 | 103.070 | 31.128 | 17.9 | 0.00 | 0.21 | 0.21 |

|      |         |        |      |         |        |      |         |        |      |         |        |      |      |      |      |
|------|---------|--------|------|---------|--------|------|---------|--------|------|---------|--------|------|------|------|------|
| 1212 | 103.071 | 31.077 | 17.4 | 103.042 | 31.051 | 17.4 | 103.013 | 31.076 | 17.9 | 103.042 | 31.102 | 17.9 | 0.00 | 0.00 | 0.00 |
| 1213 | 103.042 | 31.051 | 17.4 | 103.013 | 31.025 | 17.4 | 102.984 | 31.050 | 17.9 | 103.013 | 31.076 | 17.9 | 0.00 | 0.00 | 0.00 |
| 1214 | 103.013 | 31.025 | 17.4 | 102.984 | 30.999 | 17.4 | 102.955 | 31.024 | 17.9 | 102.984 | 31.050 | 17.9 | 0.00 | 0.00 | 0.00 |
| 1215 | 102.984 | 30.999 | 17.4 | 102.955 | 30.973 | 17.4 | 102.926 | 30.998 | 17.9 | 102.955 | 31.024 | 17.9 | 0.00 | 0.00 | 0.00 |
| 1216 | 102.955 | 30.973 | 17.4 | 102.926 | 30.947 | 17.4 | 102.897 | 30.973 | 17.9 | 102.926 | 30.998 | 17.9 | 0.00 | 0.00 | 0.00 |
| 1217 | 102.926 | 30.947 | 17.4 | 102.897 | 30.921 | 17.4 | 102.868 | 30.947 | 17.9 | 102.897 | 30.973 | 17.9 | 0.00 | 0.00 | 0.00 |
| 1218 | 102.897 | 30.921 | 17.4 | 102.869 | 30.895 | 17.4 | 102.840 | 30.921 | 17.9 | 102.868 | 30.947 | 17.9 | 0.00 | 0.00 | 0.00 |
| 1219 | 104.224 | 32.165 | 17.9 | 104.195 | 32.139 | 17.9 | 104.166 | 32.165 | 18.3 | 104.195 | 32.191 | 18.3 | 0.12 | 0.00 | 0.12 |
| 1220 | 104.195 | 32.139 | 17.9 | 104.166 | 32.113 | 17.9 | 104.137 | 32.139 | 18.3 | 104.166 | 32.165 | 18.3 | 0.40 | 1.42 | 1.47 |
| 1221 | 104.166 | 32.113 | 17.9 | 104.138 | 32.087 | 17.9 | 104.109 | 32.113 | 18.3 | 104.137 | 32.139 | 18.3 | 0.50 | 0.86 | 1.00 |
| 1222 | 104.138 | 32.087 | 17.9 | 104.109 | 32.062 | 17.9 | 104.080 | 32.087 | 18.3 | 104.109 | 32.113 | 18.3 | 0.42 | 0.16 | 0.45 |
| 1223 | 104.109 | 32.062 | 17.9 | 104.080 | 32.035 | 17.9 | 104.051 | 32.061 | 18.3 | 104.080 | 32.087 | 18.3 | 0.28 | 0.00 | 0.28 |
| 1224 | 104.080 | 32.035 | 17.9 | 104.051 | 32.010 | 17.9 | 104.022 | 32.035 | 18.3 | 104.051 | 32.061 | 18.3 | 0.15 | 0.00 | 0.15 |
| 1225 | 104.051 | 32.010 | 17.9 | 104.022 | 31.984 | 17.9 | 103.993 | 32.010 | 18.3 | 104.022 | 32.035 | 18.3 | 0.06 | 0.15 | 0.16 |
| 1226 | 104.022 | 31.984 | 17.9 | 103.993 | 31.958 | 17.9 | 103.964 | 31.983 | 18.3 | 103.993 | 32.010 | 18.3 | 0.00 | 0.59 | 0.59 |
| 1227 | 103.993 | 31.958 | 17.9 | 103.964 | 31.932 | 17.9 | 103.935 | 31.958 | 18.3 | 103.964 | 31.983 | 18.3 | 0.00 | 0.00 | 0.00 |
| 1228 | 103.964 | 31.932 | 17.9 | 103.935 | 31.906 | 17.9 | 103.906 | 31.932 | 18.3 | 103.935 | 31.958 | 18.3 | 0.23 | 0.00 | 0.23 |
| 1229 | 103.935 | 31.906 | 17.9 | 103.907 | 31.880 | 17.9 | 103.877 | 31.906 | 18.3 | 103.906 | 31.932 | 18.3 | 0.79 | 0.00 | 0.79 |
| 1230 | 103.907 | 31.880 | 17.9 | 103.878 | 31.854 | 17.9 | 103.849 | 31.880 | 18.3 | 103.877 | 31.906 | 18.3 | 1.54 | 0.00 | 1.54 |
| 1231 | 103.878 | 31.854 | 17.9 | 103.849 | 31.828 | 17.9 | 103.820 | 31.854 | 18.3 | 103.849 | 31.880 | 18.3 | 2.15 | 0.26 | 2.17 |
| 1232 | 103.849 | 31.828 | 17.9 | 103.820 | 31.802 | 17.9 | 103.791 | 31.828 | 18.3 | 103.820 | 31.854 | 18.3 | 2.24 | 0.00 | 2.24 |
| 1233 | 103.820 | 31.802 | 17.9 | 103.791 | 31.776 | 17.9 | 103.762 | 31.802 | 18.3 | 103.791 | 31.828 | 18.3 | 1.67 | 0.00 | 1.67 |
| 1234 | 103.791 | 31.776 | 17.9 | 103.762 | 31.750 | 17.9 | 103.733 | 31.776 | 18.3 | 103.762 | 31.802 | 18.3 | 0.77 | 0.00 | 0.77 |
| 1235 | 103.762 | 31.750 | 17.9 | 103.733 | 31.724 | 17.9 | 103.704 | 31.750 | 18.3 | 103.733 | 31.776 | 18.3 | 0.11 | 0.00 | 0.11 |
| 1236 | 103.733 | 31.724 | 17.9 | 103.704 | 31.698 | 17.9 | 103.675 | 31.724 | 18.3 | 103.704 | 31.750 | 18.3 | 0.00 | 0.00 | 0.00 |
| 1237 | 103.704 | 31.698 | 17.9 | 103.676 | 31.672 | 17.9 | 103.647 | 31.698 | 18.3 | 103.675 | 31.724 | 18.3 | 0.00 | 0.00 | 0.00 |
| 1238 | 103.676 | 31.672 | 17.9 | 103.647 | 31.646 | 17.9 | 103.618 | 31.672 | 18.3 | 103.647 | 31.698 | 18.3 | 0.40 | 0.00 | 0.40 |
| 1239 | 103.647 | 31.646 | 17.9 | 103.618 | 31.620 | 17.9 | 103.589 | 31.646 | 18.3 | 103.618 | 31.672 | 18.3 | 0.91 | 0.00 | 0.91 |
| 1240 | 103.618 | 31.620 | 17.9 | 103.589 | 31.594 | 17.9 | 103.560 | 31.620 | 18.3 | 103.589 | 31.646 | 18.3 | 0.99 | 0.00 | 0.99 |
| 1241 | 103.589 | 31.594 | 17.9 | 103.560 | 31.568 | 17.9 | 103.531 | 31.594 | 18.3 | 103.560 | 31.620 | 18.3 | 0.53 | 0.00 | 0.53 |
| 1242 | 103.560 | 31.568 | 17.9 | 103.531 | 31.542 | 17.9 | 103.502 | 31.568 | 18.3 | 103.531 | 31.594 | 18.3 | 0.02 | 0.00 | 0.02 |
| 1243 | 103.531 | 31.542 | 17.9 | 103.502 | 31.516 | 17.9 | 103.473 | 31.542 | 18.3 | 103.502 | 31.568 | 18.3 | 0.00 | 0.00 | 0.00 |
| 1244 | 103.502 | 31.516 | 17.9 | 103.474 | 31.491 | 17.9 | 103.444 | 31.516 | 18.3 | 103.473 | 31.542 | 18.3 | 0.00 | 0.00 | 0.00 |
| 1245 | 103.474 | 31.491 | 17.9 | 103.445 | 31.465 | 17.9 | 103.415 | 31.490 | 18.3 | 103.444 | 31.516 | 18.3 | 0.00 | 0.00 | 0.00 |
| 1246 | 103.445 | 31.465 | 17.9 | 103.416 | 31.439 | 17.9 | 103.387 | 31.464 | 18.3 | 103.415 | 31.490 | 18.3 | 0.07 | 0.10 | 0.13 |
| 1247 | 103.416 | 31.439 | 17.9 | 103.387 | 31.413 | 17.9 | 103.358 | 31.438 | 18.3 | 103.387 | 31.464 | 18.3 | 0.09 | 0.32 | 0.33 |
| 1248 | 103.387 | 31.413 | 17.9 | 103.358 | 31.387 | 17.9 | 103.329 | 31.412 | 18.3 | 103.358 | 31.438 | 18.3 | 0.04 | 0.57 | 0.57 |
| 1249 | 103.358 | 31.387 | 17.9 | 103.329 | 31.361 | 17.9 | 103.300 | 31.386 | 18.3 | 103.329 | 31.412 | 18.3 | 0.00 | 0.80 | 0.80 |
| 1250 | 103.329 | 31.361 | 17.9 | 103.300 | 31.335 | 17.9 | 103.271 | 31.360 | 18.3 | 103.300 | 31.386 | 18.3 | 0.00 | 0.99 | 0.99 |
| 1251 | 103.300 | 31.335 | 17.9 | 103.271 | 31.309 | 17.9 | 103.242 | 31.334 | 18.3 | 103.271 | 31.360 | 18.3 | 0.03 | 1.18 | 1.18 |
| 1252 | 103.271 | 31.309 | 17.9 | 103.243 | 31.283 | 17.9 | 103.213 | 31.309 | 18.3 | 103.242 | 31.334 | 18.3 | 0.09 | 1.41 | 1.41 |
| 1253 | 103.243 | 31.283 | 17.9 | 103.214 | 31.257 | 17.9 | 103.185 | 31.283 | 18.3 | 103.213 | 31.309 | 18.3 | 0.09 | 1.73 | 1.74 |
| 1254 | 103.214 | 31.257 | 17.9 | 103.185 | 31.231 | 17.9 | 103.156 | 31.257 | 18.3 | 103.185 | 31.283 | 18.3 | 0.03 | 2.09 | 2.09 |
| 1255 | 103.185 | 31.231 | 17.9 | 103.156 | 31.205 | 17.9 | 103.127 | 31.231 | 18.3 | 103.156 | 31.257 | 18.3 | 0.00 | 2.33 | 2.33 |
| 1256 | 103.156 | 31.205 | 17.9 | 103.127 | 31.179 | 17.9 | 103.098 | 31.205 | 18.3 | 103.127 | 31.231 | 18.3 | 0.00 | 2.28 | 2.28 |

|      |         |        |      |         |        |      |         |        |      |         |        |      |      |      |      |
|------|---------|--------|------|---------|--------|------|---------|--------|------|---------|--------|------|------|------|------|
| 1257 | 103.127 | 31.179 | 17.9 | 103.098 | 31.153 | 17.9 | 103.069 | 31.179 | 18.3 | 103.098 | 31.205 | 18.3 | 0.00 | 1.82 | 1.82 |
| 1258 | 103.098 | 31.153 | 17.9 | 103.069 | 31.127 | 17.9 | 103.040 | 31.153 | 18.3 | 103.069 | 31.179 | 18.3 | 0.00 | 1.03 | 1.03 |
| 1259 | 103.069 | 31.127 | 17.9 | 103.040 | 31.101 | 17.9 | 103.011 | 31.127 | 18.3 | 103.040 | 31.153 | 18.3 | 0.00 | 0.28 | 0.28 |
| 1260 | 103.040 | 31.101 | 17.9 | 103.011 | 31.075 | 17.9 | 102.983 | 31.101 | 18.3 | 103.011 | 31.127 | 18.3 | 0.00 | 0.00 | 0.00 |
| 1261 | 103.011 | 31.075 | 17.9 | 102.983 | 31.049 | 17.9 | 102.954 | 31.075 | 18.3 | 102.983 | 31.101 | 18.3 | 0.00 | 0.00 | 0.00 |
| 1262 | 102.983 | 31.049 | 17.9 | 102.954 | 31.023 | 17.9 | 102.925 | 31.049 | 18.3 | 102.954 | 31.075 | 18.3 | 0.00 | 0.00 | 0.00 |
| 1263 | 102.954 | 31.023 | 17.9 | 102.925 | 30.997 | 17.9 | 102.896 | 31.023 | 18.3 | 102.925 | 31.049 | 18.3 | 0.00 | 0.00 | 0.00 |
| 1264 | 102.925 | 30.997 | 17.9 | 102.896 | 30.971 | 17.9 | 102.867 | 30.997 | 18.3 | 102.896 | 31.023 | 18.3 | 0.00 | 0.00 | 0.00 |
| 1265 | 102.896 | 30.971 | 17.9 | 102.867 | 30.945 | 17.9 | 102.838 | 30.971 | 18.3 | 102.867 | 30.997 | 18.3 | 0.00 | 0.00 | 0.00 |
| 1266 | 102.867 | 30.945 | 17.9 | 102.838 | 30.919 | 17.9 | 102.809 | 30.945 | 18.3 | 102.838 | 30.971 | 18.3 | 0.00 | 0.00 | 0.00 |
| 1267 | 104.194 | 32.190 | 18.3 | 104.165 | 32.164 | 18.3 | 104.136 | 32.190 | 18.7 | 104.165 | 32.216 | 18.7 | 0.07 | 0.00 | 0.07 |
| 1268 | 104.165 | 32.164 | 18.3 | 104.136 | 32.138 | 18.3 | 104.107 | 32.164 | 18.7 | 104.136 | 32.190 | 18.7 | 0.27 | 1.36 | 1.39 |
| 1269 | 104.136 | 32.138 | 18.3 | 104.107 | 32.112 | 18.3 | 104.078 | 32.138 | 18.7 | 104.107 | 32.164 | 18.7 | 0.33 | 0.81 | 0.88 |
| 1270 | 104.107 | 32.112 | 18.3 | 104.078 | 32.086 | 18.3 | 104.049 | 32.112 | 18.7 | 104.078 | 32.138 | 18.7 | 0.25 | 0.13 | 0.28 |
| 1271 | 104.078 | 32.086 | 18.3 | 104.049 | 32.060 | 18.3 | 104.020 | 32.086 | 18.7 | 104.049 | 32.112 | 18.7 | 0.11 | 0.00 | 0.11 |
| 1272 | 104.049 | 32.060 | 18.3 | 104.021 | 32.034 | 18.3 | 103.992 | 32.060 | 18.7 | 104.020 | 32.086 | 18.7 | 0.02 | 0.00 | 0.02 |
| 1273 | 104.021 | 32.034 | 18.3 | 103.992 | 32.008 | 18.3 | 103.963 | 32.034 | 18.7 | 103.992 | 32.060 | 18.7 | 0.00 | 0.17 | 0.17 |
| 1274 | 103.992 | 32.008 | 18.3 | 103.963 | 31.982 | 18.3 | 103.934 | 32.008 | 18.7 | 103.963 | 32.034 | 18.7 | 0.00 | 0.61 | 0.61 |
| 1275 | 103.963 | 31.982 | 18.3 | 103.934 | 31.956 | 18.3 | 103.905 | 31.982 | 18.7 | 103.934 | 32.008 | 18.7 | 0.02 | 0.00 | 0.02 |
| 1276 | 103.934 | 31.956 | 18.3 | 103.905 | 31.930 | 18.3 | 103.876 | 31.956 | 18.7 | 103.905 | 31.982 | 18.7 | 0.26 | 0.00 | 0.26 |
| 1277 | 103.905 | 31.930 | 18.3 | 103.876 | 31.905 | 18.3 | 103.847 | 31.930 | 18.7 | 103.876 | 31.956 | 18.7 | 0.79 | 0.00 | 0.79 |
| 1278 | 103.876 | 31.905 | 18.3 | 103.847 | 31.879 | 18.3 | 103.818 | 31.904 | 18.7 | 103.847 | 31.930 | 18.7 | 1.46 | 0.00 | 1.46 |
| 1279 | 103.847 | 31.879 | 18.3 | 103.819 | 31.853 | 18.3 | 103.789 | 31.878 | 18.7 | 103.818 | 31.904 | 18.7 | 1.97 | 0.23 | 1.98 |
| 1280 | 103.819 | 31.853 | 18.3 | 103.790 | 31.827 | 18.3 | 103.760 | 31.852 | 18.7 | 103.789 | 31.878 | 18.7 | 2.05 | 0.00 | 2.05 |
| 1281 | 103.790 | 31.827 | 18.3 | 103.761 | 31.801 | 18.3 | 103.732 | 31.826 | 18.7 | 103.760 | 31.852 | 18.7 | 1.61 | 0.00 | 1.61 |
| 1282 | 103.761 | 31.801 | 18.3 | 103.732 | 31.775 | 18.3 | 103.703 | 31.801 | 18.7 | 103.732 | 31.826 | 18.7 | 0.87 | 0.00 | 0.87 |
| 1283 | 103.732 | 31.775 | 18.3 | 103.703 | 31.749 | 18.3 | 103.674 | 31.775 | 18.7 | 103.703 | 31.801 | 18.7 | 0.24 | 0.00 | 0.24 |
| 1284 | 103.703 | 31.749 | 18.3 | 103.674 | 31.723 | 18.3 | 103.645 | 31.749 | 18.7 | 103.674 | 31.775 | 18.7 | 0.00 | 0.00 | 0.00 |
| 1285 | 103.674 | 31.723 | 18.3 | 103.645 | 31.697 | 18.3 | 103.616 | 31.723 | 18.7 | 103.645 | 31.749 | 18.7 | 0.00 | 0.00 | 0.00 |
| 1286 | 103.645 | 31.697 | 18.3 | 103.616 | 31.671 | 18.3 | 103.587 | 31.697 | 18.7 | 103.616 | 31.723 | 18.7 | 0.27 | 0.00 | 0.27 |
| 1287 | 103.616 | 31.671 | 18.3 | 103.588 | 31.645 | 18.3 | 103.558 | 31.671 | 18.7 | 103.587 | 31.697 | 18.7 | 0.61 | 0.00 | 0.61 |
| 1288 | 103.588 | 31.645 | 18.3 | 103.559 | 31.619 | 18.3 | 103.529 | 31.645 | 18.7 | 103.558 | 31.671 | 18.7 | 0.65 | 0.00 | 0.65 |
| 1289 | 103.559 | 31.619 | 18.3 | 103.530 | 31.593 | 18.3 | 103.501 | 31.619 | 18.7 | 103.529 | 31.645 | 18.7 | 0.32 | 0.00 | 0.32 |
| 1290 | 103.530 | 31.593 | 18.3 | 103.501 | 31.567 | 18.3 | 103.472 | 31.593 | 18.7 | 103.501 | 31.619 | 18.7 | 0.00 | 0.00 | 0.00 |
| 1291 | 103.501 | 31.567 | 18.3 | 103.472 | 31.541 | 18.3 | 103.443 | 31.567 | 18.7 | 103.472 | 31.593 | 18.7 | 0.00 | 0.00 | 0.00 |
| 1292 | 103.472 | 31.541 | 18.3 | 103.443 | 31.515 | 18.3 | 103.414 | 31.541 | 18.7 | 103.443 | 31.567 | 18.7 | 0.00 | 0.00 | 0.00 |
| 1293 | 103.443 | 31.515 | 18.3 | 103.414 | 31.489 | 18.3 | 103.385 | 31.515 | 18.7 | 103.414 | 31.541 | 18.7 | 0.00 | 0.00 | 0.00 |
| 1294 | 103.414 | 31.489 | 18.3 | 103.385 | 31.463 | 18.3 | 103.356 | 31.489 | 18.7 | 103.385 | 31.515 | 18.7 | 0.00 | 0.12 | 0.12 |
| 1295 | 103.385 | 31.463 | 18.3 | 103.356 | 31.437 | 18.3 | 103.327 | 31.463 | 18.7 | 103.356 | 31.489 | 18.7 | 0.00 | 0.31 | 0.31 |
| 1296 | 103.356 | 31.437 | 18.3 | 103.328 | 31.411 | 18.3 | 103.299 | 31.437 | 18.7 | 103.327 | 31.463 | 18.7 | 0.00 | 0.41 | 0.41 |
| 1297 | 103.328 | 31.411 | 18.3 | 103.299 | 31.385 | 18.3 | 103.270 | 31.411 | 18.7 | 103.299 | 31.437 | 18.7 | 0.00 | 0.38 | 0.38 |
| 1298 | 103.299 | 31.385 | 18.3 | 103.270 | 31.359 | 18.3 | 103.241 | 31.385 | 18.7 | 103.270 | 31.411 | 18.7 | 0.00 | 0.30 | 0.30 |
| 1299 | 103.270 | 31.359 | 18.3 | 103.241 | 31.333 | 18.3 | 103.212 | 31.359 | 18.7 | 103.241 | 31.385 | 18.7 | 0.00 | 0.27 | 0.27 |
| 1300 | 103.241 | 31.333 | 18.3 | 103.212 | 31.308 | 18.3 | 103.183 | 31.333 | 18.7 | 103.212 | 31.359 | 18.7 | 0.06 | 0.40 | 0.41 |
| 1301 | 103.212 | 31.308 | 18.3 | 103.183 | 31.282 | 18.3 | 103.154 | 31.307 | 18.7 | 103.183 | 31.333 | 18.7 | 0.16 | 0.75 | 0.76 |

|      |         |        |      |         |        |      |         |        |      |         |        |      |      |      |      |
|------|---------|--------|------|---------|--------|------|---------|--------|------|---------|--------|------|------|------|------|
| 1302 | 103.183 | 31.282 | 18.3 | 103.154 | 31.256 | 18.3 | 103.125 | 31.281 | 18.7 | 103.154 | 31.307 | 18.7 | 0.19 | 1.22 | 1.23 |
| 1303 | 103.154 | 31.256 | 18.3 | 103.126 | 31.230 | 18.3 | 103.097 | 31.255 | 18.7 | 103.125 | 31.281 | 18.7 | 0.16 | 1.62 | 1.63 |
| 1304 | 103.126 | 31.230 | 18.3 | 103.097 | 31.204 | 18.3 | 103.068 | 31.229 | 18.7 | 103.097 | 31.255 | 18.7 | 0.09 | 1.75 | 1.76 |
| 1305 | 103.097 | 31.204 | 18.3 | 103.068 | 31.178 | 18.3 | 103.039 | 31.203 | 18.7 | 103.068 | 31.229 | 18.7 | 0.03 | 1.48 | 1.48 |
| 1306 | 103.068 | 31.178 | 18.3 | 103.039 | 31.152 | 18.3 | 103.010 | 31.177 | 18.7 | 103.039 | 31.203 | 18.7 | 0.00 | 0.86 | 0.86 |
| 1307 | 103.039 | 31.152 | 18.3 | 103.010 | 31.126 | 18.3 | 102.981 | 31.151 | 18.7 | 103.010 | 31.177 | 18.7 | 0.00 | 0.24 | 0.24 |
| 1308 | 103.010 | 31.126 | 18.3 | 102.981 | 31.100 | 18.3 | 102.952 | 31.125 | 18.7 | 102.981 | 31.151 | 18.7 | 0.00 | 0.00 | 0.00 |
| 1309 | 102.981 | 31.100 | 18.3 | 102.952 | 31.074 | 18.3 | 102.923 | 31.099 | 18.7 | 102.952 | 31.125 | 18.7 | 0.00 | 0.00 | 0.00 |
| 1310 | 102.952 | 31.074 | 18.3 | 102.924 | 31.048 | 18.3 | 102.894 | 31.073 | 18.7 | 102.923 | 31.099 | 18.7 | 0.00 | 0.00 | 0.00 |
| 1311 | 102.924 | 31.048 | 18.3 | 102.895 | 31.022 | 18.3 | 102.865 | 31.047 | 18.7 | 102.894 | 31.073 | 18.7 | 0.00 | 0.00 | 0.00 |
| 1312 | 102.895 | 31.022 | 18.3 | 102.866 | 30.996 | 18.3 | 102.837 | 31.022 | 18.7 | 102.865 | 31.047 | 18.7 | 0.00 | 0.00 | 0.00 |
| 1313 | 102.866 | 30.996 | 18.3 | 102.837 | 30.970 | 18.3 | 102.808 | 30.996 | 18.7 | 102.837 | 31.021 | 18.7 | 0.00 | 0.08 | 0.08 |
| 1314 | 102.837 | 30.970 | 18.3 | 102.808 | 30.944 | 18.3 | 102.779 | 30.970 | 18.7 | 102.808 | 30.996 | 18.7 | 0.00 | 0.00 | 0.00 |
| 1315 | 104.163 | 32.215 | 18.7 | 104.135 | 32.189 | 18.7 | 104.106 | 32.215 | 19.1 | 104.134 | 32.241 | 19.1 | 0.04 | 0.00 | 0.04 |
| 1316 | 104.135 | 32.189 | 18.7 | 104.106 | 32.163 | 18.7 | 104.077 | 32.189 | 19.1 | 104.106 | 32.215 | 19.1 | 0.19 | 1.22 | 1.24 |
| 1317 | 104.106 | 32.163 | 18.7 | 104.077 | 32.137 | 18.7 | 104.048 | 32.163 | 19.1 | 104.077 | 32.189 | 19.1 | 0.24 | 0.70 | 0.74 |
| 1318 | 104.077 | 32.137 | 18.7 | 104.048 | 32.111 | 18.7 | 104.019 | 32.137 | 19.1 | 104.048 | 32.163 | 19.1 | 0.19 | 0.09 | 0.20 |
| 1319 | 104.048 | 32.111 | 18.7 | 104.019 | 32.085 | 18.7 | 103.990 | 32.111 | 19.1 | 104.019 | 32.137 | 19.1 | 0.08 | 0.00 | 0.08 |
| 1320 | 104.019 | 32.085 | 18.7 | 103.990 | 32.059 | 18.7 | 103.961 | 32.085 | 19.1 | 103.990 | 32.111 | 19.1 | 0.01 | 0.00 | 0.01 |
| 1321 | 103.990 | 32.059 | 18.7 | 103.961 | 32.033 | 18.7 | 103.932 | 32.059 | 19.1 | 103.961 | 32.085 | 19.1 | 0.00 | 0.19 | 0.19 |
| 1322 | 103.961 | 32.033 | 18.7 | 103.932 | 32.007 | 18.7 | 103.903 | 32.033 | 19.1 | 103.932 | 32.059 | 19.1 | 0.00 | 0.63 | 0.63 |
| 1323 | 103.932 | 32.007 | 18.7 | 103.904 | 31.981 | 18.7 | 103.874 | 32.007 | 19.1 | 103.903 | 32.033 | 19.1 | 0.01 | 0.00 | 0.01 |
| 1324 | 103.904 | 31.981 | 18.7 | 103.875 | 31.955 | 18.7 | 103.846 | 31.981 | 19.1 | 103.874 | 32.007 | 19.1 | 0.21 | 0.00 | 0.21 |
| 1325 | 103.875 | 31.955 | 18.7 | 103.846 | 31.929 | 18.7 | 103.817 | 31.955 | 19.1 | 103.846 | 31.981 | 19.1 | 0.61 | 0.00 | 0.61 |
| 1326 | 103.846 | 31.929 | 18.7 | 103.817 | 31.903 | 18.7 | 103.788 | 31.929 | 19.1 | 103.817 | 31.955 | 19.1 | 1.09 | 0.00 | 1.09 |
| 1327 | 103.817 | 31.903 | 18.7 | 103.788 | 31.877 | 18.7 | 103.759 | 31.903 | 19.1 | 103.788 | 31.929 | 19.1 | 1.47 | 0.27 | 1.50 |
| 1328 | 103.788 | 31.877 | 18.7 | 103.759 | 31.851 | 18.7 | 103.730 | 31.877 | 19.1 | 103.759 | 31.903 | 19.1 | 1.56 | 0.00 | 1.56 |
| 1329 | 103.759 | 31.851 | 18.7 | 103.730 | 31.826 | 18.7 | 103.701 | 31.851 | 19.1 | 103.730 | 31.877 | 19.1 | 1.32 | 0.00 | 1.32 |
| 1330 | 103.730 | 31.826 | 18.7 | 103.701 | 31.799 | 18.7 | 103.672 | 31.825 | 19.1 | 103.701 | 31.851 | 19.1 | 0.83 | 0.00 | 0.83 |
| 1331 | 103.701 | 31.799 | 18.7 | 103.673 | 31.773 | 18.7 | 103.644 | 31.799 | 19.1 | 103.672 | 31.825 | 19.1 | 0.33 | 0.00 | 0.33 |
| 1332 | 103.673 | 31.773 | 18.7 | 103.644 | 31.747 | 18.7 | 103.615 | 31.773 | 19.1 | 103.644 | 31.799 | 19.1 | 0.05 | 0.00 | 0.05 |
| 1333 | 103.644 | 31.747 | 18.7 | 103.615 | 31.722 | 18.7 | 103.586 | 31.747 | 19.1 | 103.615 | 31.773 | 19.1 | 0.01 | 0.00 | 0.01 |
| 1334 | 103.615 | 31.722 | 18.7 | 103.586 | 31.696 | 18.7 | 103.557 | 31.721 | 19.1 | 103.586 | 31.747 | 19.1 | 0.19 | 0.00 | 0.19 |
| 1335 | 103.586 | 31.696 | 18.7 | 103.557 | 31.670 | 18.7 | 103.528 | 31.695 | 19.1 | 103.557 | 31.721 | 19.1 | 0.40 | 0.00 | 0.40 |
| 1336 | 103.557 | 31.670 | 18.7 | 103.528 | 31.644 | 18.7 | 103.499 | 31.669 | 19.1 | 103.528 | 31.695 | 19.1 | 0.40 | 0.00 | 0.40 |
| 1337 | 103.528 | 31.644 | 18.7 | 103.499 | 31.618 | 18.7 | 103.470 | 31.643 | 19.1 | 103.499 | 31.669 | 19.1 | 0.18 | 0.00 | 0.18 |
| 1338 | 103.499 | 31.618 | 18.7 | 103.471 | 31.592 | 18.7 | 103.441 | 31.617 | 19.1 | 103.470 | 31.643 | 19.1 | 0.00 | 0.00 | 0.00 |
| 1339 | 103.471 | 31.592 | 18.7 | 103.442 | 31.566 | 18.7 | 103.412 | 31.591 | 19.1 | 103.441 | 31.617 | 19.1 | 0.00 | 0.00 | 0.00 |
| 1340 | 103.442 | 31.566 | 18.7 | 103.413 | 31.540 | 18.7 | 103.384 | 31.566 | 19.1 | 103.412 | 31.591 | 19.1 | 0.00 | 0.00 | 0.00 |
| 1341 | 103.413 | 31.540 | 18.7 | 103.384 | 31.514 | 18.7 | 103.355 | 31.540 | 19.1 | 103.384 | 31.566 | 19.1 | 0.00 | 0.00 | 0.00 |
| 1342 | 103.384 | 31.514 | 18.7 | 103.355 | 31.488 | 18.7 | 103.326 | 31.514 | 19.1 | 103.355 | 31.540 | 19.1 | 0.00 | 0.21 | 0.21 |
| 1343 | 103.355 | 31.488 | 18.7 | 103.326 | 31.462 | 18.7 | 103.297 | 31.488 | 19.1 | 103.326 | 31.514 | 19.1 | 0.00 | 0.44 | 0.44 |
| 1344 | 103.326 | 31.462 | 18.7 | 103.297 | 31.436 | 18.7 | 103.268 | 31.462 | 19.1 | 103.297 | 31.488 | 19.1 | 0.00 | 0.51 | 0.51 |
| 1345 | 103.297 | 31.436 | 18.7 | 103.268 | 31.410 | 18.7 | 103.239 | 31.436 | 19.1 | 103.268 | 31.462 | 19.1 | 0.00 | 0.38 | 0.38 |
| 1346 | 103.268 | 31.410 | 18.7 | 103.240 | 31.384 | 18.7 | 103.210 | 31.410 | 19.1 | 103.239 | 31.436 | 19.1 | 0.00 | 0.15 | 0.15 |

|      |         |        |      |         |        |      |         |        |      |         |        |      |      |      |      |
|------|---------|--------|------|---------|--------|------|---------|--------|------|---------|--------|------|------|------|------|
| 1347 | 103.240 | 31.384 | 18.7 | 103.211 | 31.358 | 18.7 | 103.182 | 31.384 | 19.1 | 103.210 | 31.410 | 19.1 | 0.00 | 0.00 | 0.00 |
| 1348 | 103.211 | 31.358 | 18.7 | 103.182 | 31.332 | 18.7 | 103.153 | 31.358 | 19.1 | 103.182 | 31.384 | 19.1 | 0.12 | 0.01 | 0.12 |
| 1349 | 103.182 | 31.332 | 18.7 | 103.153 | 31.306 | 18.7 | 103.124 | 31.332 | 19.1 | 103.153 | 31.358 | 19.1 | 0.33 | 0.28 | 0.43 |
| 1350 | 103.153 | 31.306 | 18.7 | 103.124 | 31.280 | 18.7 | 103.095 | 31.306 | 19.1 | 103.124 | 31.332 | 19.1 | 0.47 | 0.71 | 0.85 |
| 1351 | 103.124 | 31.280 | 18.7 | 103.095 | 31.254 | 18.7 | 103.066 | 31.280 | 19.1 | 103.095 | 31.306 | 19.1 | 0.47 | 1.12 | 1.21 |
| 1352 | 103.095 | 31.254 | 18.7 | 103.066 | 31.228 | 18.7 | 103.037 | 31.254 | 19.1 | 103.066 | 31.280 | 19.1 | 0.38 | 1.29 | 1.35 |
| 1353 | 103.066 | 31.228 | 18.7 | 103.037 | 31.202 | 18.7 | 103.008 | 31.228 | 19.1 | 103.037 | 31.254 | 19.1 | 0.26 | 1.11 | 1.14 |
| 1354 | 103.037 | 31.202 | 18.7 | 103.009 | 31.176 | 18.7 | 102.980 | 31.202 | 19.1 | 103.008 | 31.228 | 19.1 | 0.15 | 0.64 | 0.65 |
| 1355 | 103.009 | 31.176 | 18.7 | 102.980 | 31.150 | 18.7 | 102.951 | 31.176 | 19.1 | 102.980 | 31.202 | 19.1 | 0.06 | 0.16 | 0.17 |
| 1356 | 102.980 | 31.150 | 18.7 | 102.951 | 31.124 | 18.7 | 102.922 | 31.150 | 19.1 | 102.951 | 31.176 | 19.1 | 0.00 | 0.00 | 0.00 |
| 1357 | 102.951 | 31.124 | 18.7 | 102.922 | 31.098 | 18.7 | 102.893 | 31.124 | 19.1 | 102.922 | 31.150 | 19.1 | 0.00 | 0.00 | 0.00 |
| 1358 | 102.922 | 31.098 | 18.7 | 102.893 | 31.072 | 18.7 | 102.864 | 31.098 | 19.1 | 102.893 | 31.124 | 19.1 | 0.00 | 0.00 | 0.00 |
| 1359 | 102.893 | 31.072 | 18.7 | 102.864 | 31.046 | 18.7 | 102.835 | 31.072 | 19.1 | 102.864 | 31.098 | 19.1 | 0.00 | 0.00 | 0.00 |
| 1360 | 102.864 | 31.046 | 18.7 | 102.835 | 31.020 | 18.7 | 102.806 | 31.046 | 19.1 | 102.835 | 31.072 | 19.1 | 0.00 | 0.04 | 0.04 |
| 1361 | 102.835 | 31.020 | 18.7 | 102.806 | 30.994 | 18.7 | 102.777 | 31.020 | 19.1 | 102.806 | 31.046 | 19.1 | 0.00 | 0.41 | 0.41 |
| 1362 | 102.806 | 30.994 | 18.7 | 102.778 | 30.968 | 18.7 | 102.749 | 30.994 | 19.1 | 102.777 | 31.020 | 19.1 | 0.00 | 0.00 | 0.00 |
| 1363 | 104.133 | 32.240 | 19.1 | 104.104 | 32.214 | 19.1 | 104.075 | 32.240 | 19.5 | 104.104 | 32.266 | 19.5 | 0.02 | 0.00 | 0.02 |
| 1364 | 104.104 | 32.214 | 19.1 | 104.075 | 32.188 | 19.1 | 104.046 | 32.214 | 19.5 | 104.075 | 32.240 | 19.5 | 0.16 | 1.00 | 1.01 |
| 1365 | 104.075 | 32.188 | 19.1 | 104.046 | 32.162 | 19.1 | 104.017 | 32.188 | 19.5 | 104.046 | 32.214 | 19.5 | 0.23 | 0.58 | 0.63 |
| 1366 | 104.046 | 32.162 | 19.1 | 104.017 | 32.136 | 19.1 | 103.988 | 32.162 | 19.5 | 104.017 | 32.188 | 19.5 | 0.23 | 0.06 | 0.24 |
| 1367 | 104.017 | 32.136 | 19.1 | 103.989 | 32.110 | 19.1 | 103.960 | 32.136 | 19.5 | 103.988 | 32.162 | 19.5 | 0.17 | 0.00 | 0.17 |
| 1368 | 103.989 | 32.110 | 19.1 | 103.960 | 32.084 | 19.1 | 103.931 | 32.110 | 19.5 | 103.960 | 32.136 | 19.5 | 0.11 | 0.00 | 0.11 |
| 1369 | 103.960 | 32.084 | 19.1 | 103.931 | 32.058 | 19.1 | 103.902 | 32.084 | 19.5 | 103.931 | 32.110 | 19.5 | 0.06 | 0.23 | 0.24 |
| 1370 | 103.931 | 32.058 | 19.1 | 103.902 | 32.032 | 19.1 | 103.873 | 32.058 | 19.5 | 103.902 | 32.084 | 19.5 | 0.02 | 0.67 | 0.67 |
| 1371 | 103.902 | 32.032 | 19.1 | 103.873 | 32.006 | 19.1 | 103.844 | 32.032 | 19.5 | 103.873 | 32.058 | 19.5 | 0.02 | 0.00 | 0.02 |
| 1372 | 103.873 | 32.006 | 19.1 | 103.844 | 31.980 | 19.1 | 103.815 | 32.006 | 19.5 | 103.844 | 32.032 | 19.5 | 0.13 | 0.00 | 0.13 |
| 1373 | 103.844 | 31.980 | 19.1 | 103.815 | 31.954 | 19.1 | 103.786 | 31.980 | 19.5 | 103.815 | 32.006 | 19.5 | 0.38 | 0.00 | 0.38 |
| 1374 | 103.815 | 31.954 | 19.1 | 103.787 | 31.928 | 19.1 | 103.757 | 31.954 | 19.5 | 103.786 | 31.980 | 19.5 | 0.69 | 0.00 | 0.69 |
| 1375 | 103.787 | 31.928 | 19.1 | 103.758 | 31.902 | 19.1 | 103.729 | 31.928 | 19.5 | 103.757 | 31.954 | 19.5 | 0.93 | 0.38 | 1.00 |
| 1376 | 103.758 | 31.902 | 19.1 | 103.729 | 31.876 | 19.1 | 103.700 | 31.902 | 19.5 | 103.729 | 31.928 | 19.5 | 1.00 | 0.00 | 1.00 |
| 1377 | 103.729 | 31.876 | 19.1 | 103.700 | 31.850 | 19.1 | 103.671 | 31.876 | 19.5 | 103.700 | 31.902 | 19.5 | 0.95 | 0.00 | 0.95 |
| 1378 | 103.700 | 31.850 | 19.1 | 103.671 | 31.824 | 19.1 | 103.642 | 31.850 | 19.5 | 103.671 | 31.876 | 19.5 | 0.70 | 0.00 | 0.70 |
| 1379 | 103.671 | 31.824 | 19.1 | 103.642 | 31.798 | 19.1 | 103.613 | 31.824 | 19.5 | 103.642 | 31.850 | 19.5 | 0.37 | 0.00 | 0.37 |
| 1380 | 103.642 | 31.798 | 19.1 | 103.613 | 31.772 | 19.1 | 103.584 | 31.798 | 19.5 | 103.613 | 31.824 | 19.5 | 0.13 | 0.00 | 0.13 |
| 1381 | 103.613 | 31.772 | 19.1 | 103.584 | 31.746 | 19.1 | 103.555 | 31.772 | 19.5 | 103.584 | 31.798 | 19.5 | 0.07 | 0.00 | 0.07 |
| 1382 | 103.584 | 31.746 | 19.1 | 103.556 | 31.720 | 19.1 | 103.526 | 31.746 | 19.5 | 103.555 | 31.772 | 19.5 | 0.16 | 0.00 | 0.16 |
| 1383 | 103.556 | 31.720 | 19.1 | 103.527 | 31.694 | 19.1 | 103.498 | 31.720 | 19.5 | 103.526 | 31.746 | 19.5 | 0.27 | 0.00 | 0.27 |
| 1384 | 103.527 | 31.694 | 19.1 | 103.498 | 31.668 | 19.1 | 103.469 | 31.694 | 19.5 | 103.498 | 31.720 | 19.5 | 0.24 | 0.00 | 0.24 |
| 1385 | 103.498 | 31.668 | 19.1 | 103.469 | 31.642 | 19.1 | 103.440 | 31.668 | 19.5 | 103.469 | 31.694 | 19.5 | 0.09 | 0.00 | 0.09 |
| 1386 | 103.469 | 31.642 | 19.1 | 103.440 | 31.616 | 19.1 | 103.411 | 31.642 | 19.5 | 103.440 | 31.668 | 19.5 | 0.00 | 0.00 | 0.00 |
| 1387 | 103.440 | 31.616 | 19.1 | 103.411 | 31.590 | 19.1 | 103.382 | 31.616 | 19.5 | 103.411 | 31.642 | 19.5 | 0.00 | 0.00 | 0.00 |
| 1388 | 103.411 | 31.590 | 19.1 | 103.382 | 31.564 | 19.1 | 103.353 | 31.590 | 19.5 | 103.382 | 31.616 | 19.5 | 0.00 | 0.00 | 0.00 |
| 1389 | 103.382 | 31.564 | 19.1 | 103.353 | 31.538 | 19.1 | 103.324 | 31.564 | 19.5 | 103.353 | 31.590 | 19.5 | 0.00 | 0.15 | 0.15 |
| 1390 | 103.353 | 31.538 | 19.1 | 103.325 | 31.512 | 19.1 | 103.296 | 31.538 | 19.5 | 103.324 | 31.564 | 19.5 | 0.00 | 0.50 | 0.50 |
| 1391 | 103.325 | 31.512 | 19.1 | 103.296 | 31.486 | 19.1 | 103.267 | 31.512 | 19.5 | 103.296 | 31.538 | 19.5 | 0.00 | 0.84 | 0.84 |

|      |         |        |      |         |        |      |         |        |      |         |        |      |      |      |      |
|------|---------|--------|------|---------|--------|------|---------|--------|------|---------|--------|------|------|------|------|
| 1392 | 103.296 | 31.486 | 19.1 | 103.267 | 31.461 | 19.1 | 103.238 | 31.486 | 19.5 | 103.267 | 31.512 | 19.5 | 0.00 | 0.99 | 0.99 |
| 1393 | 103.267 | 31.461 | 19.1 | 103.238 | 31.435 | 19.1 | 103.209 | 31.460 | 19.5 | 103.238 | 31.486 | 19.5 | 0.00 | 0.90 | 0.90 |
| 1394 | 103.238 | 31.435 | 19.1 | 103.209 | 31.409 | 19.1 | 103.180 | 31.434 | 19.5 | 103.209 | 31.460 | 19.5 | 0.00 | 0.67 | 0.67 |
| 1395 | 103.209 | 31.409 | 19.1 | 103.180 | 31.383 | 19.1 | 103.151 | 31.408 | 19.5 | 103.180 | 31.434 | 19.5 | 0.00 | 0.46 | 0.46 |
| 1396 | 103.180 | 31.383 | 19.1 | 103.151 | 31.357 | 19.1 | 103.122 | 31.382 | 19.5 | 103.151 | 31.408 | 19.5 | 0.15 | 0.37 | 0.40 |
| 1397 | 103.151 | 31.357 | 19.1 | 103.123 | 31.331 | 19.1 | 103.094 | 31.356 | 19.5 | 103.122 | 31.382 | 19.5 | 0.43 | 0.48 | 0.64 |
| 1398 | 103.123 | 31.331 | 19.1 | 103.094 | 31.305 | 19.1 | 103.065 | 31.330 | 19.5 | 103.094 | 31.356 | 19.5 | 0.66 | 0.74 | 0.99 |
| 1399 | 103.094 | 31.305 | 19.1 | 103.065 | 31.279 | 19.1 | 103.036 | 31.304 | 19.5 | 103.065 | 31.330 | 19.5 | 0.74 | 1.02 | 1.25 |
| 1400 | 103.065 | 31.279 | 19.1 | 103.036 | 31.253 | 19.1 | 103.007 | 31.278 | 19.5 | 103.036 | 31.304 | 19.5 | 0.68 | 1.12 | 1.31 |
| 1401 | 103.036 | 31.253 | 19.1 | 103.007 | 31.227 | 19.1 | 102.978 | 31.253 | 19.5 | 103.007 | 31.278 | 19.5 | 0.56 | 0.95 | 1.11 |
| 1402 | 103.007 | 31.227 | 19.1 | 102.978 | 31.201 | 19.1 | 102.949 | 31.227 | 19.5 | 102.978 | 31.252 | 19.5 | 0.41 | 0.57 | 0.70 |
| 1403 | 102.978 | 31.201 | 19.1 | 102.949 | 31.175 | 19.1 | 102.920 | 31.201 | 19.5 | 102.949 | 31.227 | 19.5 | 0.25 | 0.17 | 0.30 |
| 1404 | 102.949 | 31.175 | 19.1 | 102.921 | 31.149 | 19.1 | 102.891 | 31.174 | 19.5 | 102.920 | 31.201 | 19.5 | 0.09 | 0.00 | 0.09 |
| 1405 | 102.921 | 31.149 | 19.1 | 102.892 | 31.123 | 19.1 | 102.862 | 31.148 | 19.5 | 102.891 | 31.174 | 19.5 | 0.00 | 0.00 | 0.00 |
| 1406 | 102.892 | 31.123 | 19.1 | 102.863 | 31.097 | 19.1 | 102.834 | 31.122 | 19.5 | 102.862 | 31.148 | 19.5 | 0.00 | 0.00 | 0.00 |
| 1407 | 102.863 | 31.097 | 19.1 | 102.834 | 31.071 | 19.1 | 102.805 | 31.097 | 19.5 | 102.834 | 31.122 | 19.5 | 0.00 | 0.05 | 0.05 |
| 1408 | 102.834 | 31.071 | 19.1 | 102.805 | 31.045 | 19.1 | 102.776 | 31.071 | 19.5 | 102.805 | 31.097 | 19.5 | 0.00 | 0.39 | 0.39 |
| 1409 | 102.805 | 31.045 | 19.1 | 102.776 | 31.019 | 19.1 | 102.747 | 31.045 | 19.5 | 102.776 | 31.071 | 19.5 | 0.00 | 0.84 | 0.84 |
| 1410 | 102.776 | 31.019 | 19.1 | 102.747 | 30.993 | 19.1 | 102.718 | 31.019 | 19.5 | 102.747 | 31.045 | 19.5 | 0.00 | 0.00 | 0.00 |
| 1411 | 104.103 | 32.265 | 19.5 | 104.074 | 32.239 | 19.5 | 104.045 | 32.264 | 19.9 | 104.073 | 32.291 | 19.9 | 0.02 | 0.00 | 0.02 |
| 1412 | 104.074 | 32.239 | 19.5 | 104.045 | 32.213 | 19.5 | 104.016 | 32.239 | 19.9 | 104.045 | 32.264 | 19.9 | 0.17 | 1.00 | 1.01 |
| 1413 | 104.045 | 32.213 | 19.5 | 104.016 | 32.187 | 19.5 | 103.987 | 32.213 | 19.9 | 104.016 | 32.239 | 19.9 | 0.28 | 0.63 | 0.68 |
| 1414 | 104.016 | 32.187 | 19.5 | 103.987 | 32.161 | 19.5 | 103.958 | 32.187 | 19.9 | 103.987 | 32.213 | 19.9 | 0.33 | 0.12 | 0.35 |
| 1415 | 103.987 | 32.161 | 19.5 | 103.958 | 32.135 | 19.5 | 103.929 | 32.161 | 19.9 | 103.958 | 32.187 | 19.9 | 0.32 | 0.00 | 0.32 |
| 1416 | 103.958 | 32.135 | 19.5 | 103.929 | 32.109 | 19.5 | 103.900 | 32.135 | 19.9 | 103.929 | 32.161 | 19.9 | 0.28 | 0.00 | 0.28 |
| 1417 | 103.929 | 32.109 | 19.5 | 103.900 | 32.083 | 19.5 | 103.871 | 32.109 | 19.9 | 103.900 | 32.135 | 19.9 | 0.21 | 0.32 | 0.38 |
| 1418 | 103.900 | 32.083 | 19.5 | 103.872 | 32.057 | 19.5 | 103.843 | 32.083 | 19.9 | 103.871 | 32.109 | 19.9 | 0.13 | 0.75 | 0.76 |
| 1419 | 103.872 | 32.057 | 19.5 | 103.843 | 32.031 | 19.5 | 103.814 | 32.057 | 19.9 | 103.843 | 32.083 | 19.9 | 0.09 | 0.00 | 0.09 |
| 1420 | 103.843 | 32.031 | 19.5 | 103.814 | 32.005 | 19.5 | 103.785 | 32.031 | 19.9 | 103.814 | 32.057 | 19.9 | 0.13 | 0.00 | 0.13 |
| 1421 | 103.814 | 32.005 | 19.5 | 103.785 | 31.979 | 19.5 | 103.756 | 32.005 | 19.9 | 103.785 | 32.031 | 19.9 | 0.25 | 0.00 | 0.25 |
| 1422 | 103.785 | 31.979 | 19.5 | 103.756 | 31.953 | 19.5 | 103.727 | 31.979 | 19.9 | 103.756 | 32.005 | 19.9 | 0.42 | 0.00 | 0.42 |
| 1423 | 103.756 | 31.953 | 19.5 | 103.727 | 31.927 | 19.5 | 103.698 | 31.953 | 19.9 | 103.727 | 31.979 | 19.9 | 0.56 | 0.62 | 0.84 |
| 1424 | 103.727 | 31.927 | 19.5 | 103.698 | 31.901 | 19.5 | 103.669 | 31.927 | 19.9 | 103.698 | 31.953 | 19.9 | 0.64 | 0.23 | 0.68 |
| 1425 | 103.698 | 31.901 | 19.5 | 103.669 | 31.875 | 19.5 | 103.640 | 31.901 | 19.9 | 103.669 | 31.927 | 19.9 | 0.66 | 0.01 | 0.66 |
| 1426 | 103.669 | 31.875 | 19.5 | 103.641 | 31.849 | 19.5 | 103.612 | 31.875 | 19.9 | 103.640 | 31.901 | 19.9 | 0.55 | 0.00 | 0.55 |
| 1427 | 103.641 | 31.849 | 19.5 | 103.612 | 31.823 | 19.5 | 103.583 | 31.849 | 19.9 | 103.612 | 31.875 | 19.9 | 0.36 | 0.00 | 0.36 |
| 1428 | 103.612 | 31.823 | 19.5 | 103.583 | 31.797 | 19.5 | 103.554 | 31.823 | 19.9 | 103.583 | 31.849 | 19.9 | 0.19 | 0.00 | 0.19 |
| 1429 | 103.583 | 31.797 | 19.5 | 103.554 | 31.771 | 19.5 | 103.525 | 31.797 | 19.9 | 103.554 | 31.823 | 19.9 | 0.14 | 0.00 | 0.14 |
| 1430 | 103.554 | 31.771 | 19.5 | 103.525 | 31.745 | 19.5 | 103.496 | 31.771 | 19.9 | 103.525 | 31.797 | 19.9 | 0.17 | 0.00 | 0.17 |
| 1431 | 103.525 | 31.745 | 19.5 | 103.496 | 31.719 | 19.5 | 103.467 | 31.745 | 19.9 | 103.496 | 31.771 | 19.9 | 0.20 | 0.00 | 0.20 |
| 1432 | 103.496 | 31.719 | 19.5 | 103.467 | 31.693 | 19.5 | 103.438 | 31.719 | 19.9 | 103.467 | 31.745 | 19.9 | 0.15 | 0.00 | 0.15 |
| 1433 | 103.467 | 31.693 | 19.5 | 103.439 | 31.667 | 19.5 | 103.409 | 31.693 | 19.9 | 103.438 | 31.719 | 19.9 | 0.04 | 0.00 | 0.04 |
| 1434 | 103.439 | 31.667 | 19.5 | 103.410 | 31.641 | 19.5 | 103.381 | 31.667 | 19.9 | 103.409 | 31.693 | 19.9 | 0.00 | 0.00 | 0.00 |
| 1435 | 103.410 | 31.641 | 19.5 | 103.381 | 31.615 | 19.5 | 103.352 | 31.641 | 19.9 | 103.381 | 31.667 | 19.9 | 0.00 | 0.00 | 0.00 |
| 1436 | 103.381 | 31.615 | 19.5 | 103.352 | 31.589 | 19.5 | 103.323 | 31.615 | 19.9 | 103.352 | 31.641 | 19.9 | 0.00 | 0.17 | 0.17 |

|      |         |        |      |         |        |      |         |        |      |         |        |      |      |      |      |
|------|---------|--------|------|---------|--------|------|---------|--------|------|---------|--------|------|------|------|------|
| 1437 | 103.352 | 31.589 | 19.5 | 103.323 | 31.563 | 19.5 | 103.294 | 31.589 | 19.9 | 103.323 | 31.615 | 19.9 | 0.00 | 0.51 | 0.51 |
| 1438 | 103.323 | 31.563 | 19.5 | 103.294 | 31.537 | 19.5 | 103.265 | 31.563 | 19.9 | 103.294 | 31.589 | 19.9 | 0.00 | 0.97 | 0.97 |
| 1439 | 103.294 | 31.537 | 19.5 | 103.265 | 31.511 | 19.5 | 103.236 | 31.537 | 19.9 | 103.265 | 31.563 | 19.9 | 0.00 | 1.37 | 1.37 |
| 1440 | 103.265 | 31.511 | 19.5 | 103.237 | 31.485 | 19.5 | 103.207 | 31.511 | 19.9 | 103.236 | 31.537 | 19.9 | 0.00 | 1.60 | 1.60 |
| 1441 | 103.237 | 31.485 | 19.5 | 103.208 | 31.459 | 19.5 | 103.178 | 31.485 | 19.9 | 103.207 | 31.511 | 19.9 | 0.00 | 1.63 | 1.63 |
| 1442 | 103.208 | 31.459 | 19.5 | 103.179 | 31.433 | 19.5 | 103.150 | 31.459 | 19.9 | 103.178 | 31.485 | 19.9 | 0.00 | 1.51 | 1.51 |
| 1443 | 103.179 | 31.433 | 19.5 | 103.150 | 31.407 | 19.5 | 103.121 | 31.433 | 19.9 | 103.150 | 31.459 | 19.9 | 0.00 | 1.30 | 1.30 |
| 1444 | 103.150 | 31.407 | 19.5 | 103.121 | 31.381 | 19.5 | 103.092 | 31.407 | 19.9 | 103.121 | 31.433 | 19.9 | 0.11 | 1.12 | 1.12 |
| 1445 | 103.121 | 31.381 | 19.5 | 103.092 | 31.355 | 19.5 | 103.063 | 31.381 | 19.9 | 103.092 | 31.407 | 19.9 | 0.37 | 1.05 | 1.11 |
| 1446 | 103.092 | 31.355 | 19.5 | 103.063 | 31.329 | 19.5 | 103.034 | 31.355 | 19.9 | 103.063 | 31.381 | 19.9 | 0.62 | 1.09 | 1.26 |
| 1447 | 103.063 | 31.329 | 19.5 | 103.034 | 31.303 | 19.5 | 103.005 | 31.329 | 19.9 | 103.034 | 31.355 | 19.9 | 0.77 | 1.18 | 1.41 |
| 1448 | 103.034 | 31.303 | 19.5 | 103.006 | 31.277 | 19.5 | 102.977 | 31.303 | 19.9 | 103.005 | 31.329 | 19.9 | 0.80 | 1.18 | 1.43 |
| 1449 | 103.006 | 31.277 | 19.5 | 102.977 | 31.251 | 19.5 | 102.948 | 31.277 | 19.9 | 102.977 | 31.303 | 19.9 | 0.75 | 1.02 | 1.26 |
| 1450 | 102.977 | 31.251 | 19.5 | 102.948 | 31.225 | 19.5 | 102.919 | 31.251 | 19.9 | 102.948 | 31.277 | 19.9 | 0.64 | 0.71 | 0.96 |
| 1451 | 102.948 | 31.225 | 19.5 | 102.919 | 31.199 | 19.5 | 102.890 | 31.225 | 19.9 | 102.919 | 31.251 | 19.9 | 0.50 | 0.39 | 0.63 |
| 1452 | 102.919 | 31.199 | 19.5 | 102.890 | 31.173 | 19.5 | 102.861 | 31.199 | 19.9 | 102.890 | 31.225 | 19.9 | 0.31 | 0.18 | 0.36 |
| 1453 | 102.890 | 31.173 | 19.5 | 102.861 | 31.147 | 19.5 | 102.832 | 31.173 | 19.9 | 102.861 | 31.199 | 19.9 | 0.13 | 0.10 | 0.17 |
| 1454 | 102.861 | 31.147 | 19.5 | 102.832 | 31.121 | 19.5 | 102.803 | 31.147 | 19.9 | 102.832 | 31.173 | 19.9 | 0.02 | 0.14 | 0.14 |
| 1455 | 102.832 | 31.121 | 19.5 | 102.803 | 31.095 | 19.5 | 102.774 | 31.121 | 19.9 | 102.803 | 31.147 | 19.9 | 0.00 | 0.33 | 0.33 |
| 1456 | 102.803 | 31.095 | 19.5 | 102.775 | 31.069 | 19.5 | 102.746 | 31.095 | 19.9 | 102.774 | 31.121 | 19.9 | 0.00 | 0.75 | 0.75 |
| 1457 | 102.775 | 31.069 | 19.5 | 102.746 | 31.044 | 19.5 | 102.717 | 31.069 | 19.9 | 102.746 | 31.095 | 19.9 | 0.00 | 1.00 | 1.00 |
| 1458 | 102.746 | 31.044 | 19.5 | 102.717 | 31.017 | 19.5 | 102.688 | 31.043 | 19.9 | 102.717 | 31.069 | 19.9 | 0.00 | 0.00 | 0.00 |
| 1459 | 104.072 | 32.289 | 19.9 | 104.043 | 32.263 | 19.9 | 104.014 | 32.289 | 20.4 | 104.043 | 32.315 | 20.4 | 0.02 | 0.00 | 0.02 |
| 1460 | 104.043 | 32.263 | 19.9 | 104.014 | 32.237 | 19.9 | 103.985 | 32.263 | 20.4 | 104.014 | 32.289 | 20.4 | 0.17 | 1.00 | 1.01 |
| 1461 | 104.014 | 32.237 | 19.9 | 103.986 | 32.211 | 19.9 | 103.956 | 32.237 | 20.4 | 103.985 | 32.263 | 20.4 | 0.32 | 0.76 | 0.82 |
| 1462 | 103.986 | 32.211 | 19.9 | 103.957 | 32.185 | 19.9 | 103.928 | 32.211 | 20.4 | 103.956 | 32.237 | 20.4 | 0.43 | 0.34 | 0.55 |
| 1463 | 103.957 | 32.185 | 19.9 | 103.928 | 32.160 | 19.9 | 103.899 | 32.185 | 20.4 | 103.928 | 32.211 | 20.4 | 0.48 | 0.17 | 0.51 |
| 1464 | 103.928 | 32.160 | 19.9 | 103.899 | 32.133 | 19.9 | 103.870 | 32.159 | 20.4 | 103.899 | 32.185 | 20.4 | 0.46 | 0.22 | 0.51 |
| 1465 | 103.899 | 32.133 | 19.9 | 103.870 | 32.108 | 19.9 | 103.841 | 32.133 | 20.4 | 103.870 | 32.159 | 20.4 | 0.39 | 0.56 | 0.68 |
| 1466 | 103.870 | 32.108 | 19.9 | 103.841 | 32.081 | 19.9 | 103.812 | 32.107 | 20.4 | 103.841 | 32.133 | 20.4 | 0.29 | 0.89 | 0.93 |
| 1467 | 103.841 | 32.081 | 19.9 | 103.812 | 32.056 | 19.9 | 103.783 | 32.081 | 20.4 | 103.812 | 32.107 | 20.4 | 0.22 | 0.00 | 0.22 |
| 1468 | 103.812 | 32.056 | 19.9 | 103.783 | 32.029 | 19.9 | 103.754 | 32.055 | 20.4 | 103.783 | 32.081 | 20.4 | 0.21 | 0.00 | 0.21 |
| 1469 | 103.783 | 32.029 | 19.9 | 103.755 | 32.004 | 19.9 | 103.725 | 32.029 | 20.4 | 103.754 | 32.055 | 20.4 | 0.26 | 0.00 | 0.26 |
| 1470 | 103.755 | 32.004 | 19.9 | 103.726 | 31.978 | 19.9 | 103.697 | 32.003 | 20.4 | 103.725 | 32.029 | 20.4 | 0.33 | 0.00 | 0.33 |
| 1471 | 103.726 | 31.978 | 19.9 | 103.697 | 31.952 | 19.9 | 103.668 | 31.977 | 20.4 | 103.697 | 32.003 | 20.4 | 0.40 | 0.82 | 0.91 |
| 1472 | 103.697 | 31.952 | 19.9 | 103.668 | 31.926 | 19.9 | 103.639 | 31.951 | 20.4 | 103.668 | 31.977 | 20.4 | 0.44 | 0.65 | 0.78 |
| 1473 | 103.668 | 31.926 | 19.9 | 103.639 | 31.900 | 19.9 | 103.610 | 31.925 | 20.4 | 103.639 | 31.951 | 20.4 | 0.45 | 0.44 | 0.63 |
| 1474 | 103.639 | 31.900 | 19.9 | 103.610 | 31.874 | 19.9 | 103.581 | 31.899 | 20.4 | 103.610 | 31.925 | 20.4 | 0.40 | 0.34 | 0.53 |
| 1475 | 103.610 | 31.874 | 19.9 | 103.581 | 31.848 | 19.9 | 103.552 | 31.873 | 20.4 | 103.581 | 31.899 | 20.4 | 0.31 | 0.28 | 0.42 |
| 1476 | 103.581 | 31.848 | 19.9 | 103.552 | 31.822 | 19.9 | 103.523 | 31.847 | 20.4 | 103.552 | 31.873 | 20.4 | 0.22 | 0.25 | 0.33 |
| 1477 | 103.552 | 31.822 | 19.9 | 103.524 | 31.796 | 19.9 | 103.495 | 31.822 | 20.4 | 103.523 | 31.847 | 20.4 | 0.18 | 0.24 | 0.30 |
| 1478 | 103.524 | 31.796 | 19.9 | 103.495 | 31.770 | 19.9 | 103.466 | 31.796 | 20.4 | 103.495 | 31.821 | 20.4 | 0.19 | 0.24 | 0.30 |
| 1479 | 103.495 | 31.770 | 19.9 | 103.466 | 31.744 | 19.9 | 103.437 | 31.770 | 20.4 | 103.466 | 31.796 | 20.4 | 0.17 | 0.25 | 0.30 |
| 1480 | 103.466 | 31.744 | 19.9 | 103.437 | 31.718 | 19.9 | 103.408 | 31.744 | 20.4 | 103.437 | 31.770 | 20.4 | 0.09 | 0.26 | 0.28 |
| 1481 | 103.437 | 31.718 | 19.9 | 103.408 | 31.692 | 19.9 | 103.379 | 31.718 | 20.4 | 103.408 | 31.744 | 20.4 | 0.01 | 0.29 | 0.29 |

|      |         |        |      |         |        |      |         |        |      |         |        |      |      |      |      |
|------|---------|--------|------|---------|--------|------|---------|--------|------|---------|--------|------|------|------|------|
| 1482 | 103.408 | 31.692 | 19.9 | 103.379 | 31.666 | 19.9 | 103.350 | 31.692 | 20.4 | 103.379 | 31.718 | 20.4 | 0.00 | 0.33 | 0.33 |
| 1483 | 103.379 | 31.666 | 19.9 | 103.350 | 31.640 | 19.9 | 103.321 | 31.666 | 20.4 | 103.350 | 31.692 | 20.4 | 0.00 | 0.41 | 0.41 |
| 1484 | 103.350 | 31.640 | 19.9 | 103.322 | 31.614 | 19.9 | 103.293 | 31.640 | 20.4 | 103.321 | 31.666 | 20.4 | 0.00 | 0.59 | 0.59 |
| 1485 | 103.322 | 31.614 | 19.9 | 103.293 | 31.588 | 19.9 | 103.264 | 31.613 | 20.4 | 103.293 | 31.640 | 20.4 | 0.00 | 0.86 | 0.86 |
| 1486 | 103.293 | 31.588 | 19.9 | 103.264 | 31.562 | 19.9 | 103.235 | 31.587 | 20.4 | 103.264 | 31.613 | 20.4 | 0.00 | 1.18 | 1.18 |
| 1487 | 103.264 | 31.562 | 19.9 | 103.235 | 31.536 | 19.9 | 103.206 | 31.561 | 20.4 | 103.235 | 31.587 | 20.4 | 0.00 | 1.45 | 1.45 |
| 1488 | 103.235 | 31.536 | 19.9 | 103.206 | 31.510 | 19.9 | 103.177 | 31.535 | 20.4 | 103.206 | 31.561 | 20.4 | 0.00 | 1.66 | 1.66 |
| 1489 | 103.206 | 31.510 | 19.9 | 103.177 | 31.484 | 19.9 | 103.148 | 31.509 | 20.4 | 103.177 | 31.535 | 20.4 | 0.00 | 1.77 | 1.77 |
| 1490 | 103.177 | 31.484 | 19.9 | 103.148 | 31.458 | 19.9 | 103.119 | 31.483 | 20.4 | 103.148 | 31.509 | 20.4 | 0.00 | 1.83 | 1.83 |
| 1491 | 103.148 | 31.458 | 19.9 | 103.120 | 31.432 | 19.9 | 103.090 | 31.457 | 20.4 | 103.119 | 31.483 | 20.4 | 0.00 | 1.69 | 1.69 |
| 1492 | 103.120 | 31.432 | 19.9 | 103.091 | 31.406 | 19.9 | 103.061 | 31.431 | 20.4 | 103.090 | 31.457 | 20.4 | 0.02 | 1.46 | 1.46 |
| 1493 | 103.091 | 31.406 | 19.9 | 103.062 | 31.380 | 19.9 | 103.033 | 31.405 | 20.4 | 103.061 | 31.431 | 20.4 | 0.18 | 1.25 | 1.26 |
| 1494 | 103.062 | 31.380 | 19.9 | 103.033 | 31.354 | 19.9 | 103.004 | 31.380 | 20.4 | 103.033 | 31.405 | 20.4 | 0.39 | 1.13 | 1.20 |
| 1495 | 103.033 | 31.354 | 19.9 | 103.004 | 31.328 | 19.9 | 102.975 | 31.354 | 20.4 | 103.004 | 31.380 | 20.4 | 0.57 | 1.10 | 1.24 |
| 1496 | 103.004 | 31.328 | 19.9 | 102.975 | 31.302 | 19.9 | 102.946 | 31.328 | 20.4 | 102.975 | 31.354 | 20.4 | 0.68 | 1.06 | 1.26 |
| 1497 | 102.975 | 31.302 | 19.9 | 102.946 | 31.276 | 19.9 | 102.917 | 31.302 | 20.4 | 102.946 | 31.328 | 20.4 | 0.73 | 0.96 | 1.21 |
| 1498 | 102.946 | 31.276 | 19.9 | 102.917 | 31.250 | 19.9 | 102.888 | 31.276 | 20.4 | 102.917 | 31.302 | 20.4 | 0.74 | 0.79 | 1.08 |
| 1499 | 102.917 | 31.250 | 19.9 | 102.889 | 31.224 | 19.9 | 102.859 | 31.250 | 20.4 | 102.888 | 31.276 | 20.4 | 0.70 | 0.61 | 0.92 |
| 1500 | 102.889 | 31.224 | 19.9 | 102.860 | 31.198 | 19.9 | 102.831 | 31.224 | 20.4 | 102.859 | 31.250 | 20.4 | 0.58 | 0.47 | 0.75 |
| 1501 | 102.860 | 31.198 | 19.9 | 102.831 | 31.172 | 19.9 | 102.802 | 31.198 | 20.4 | 102.831 | 31.224 | 20.4 | 0.41 | 0.41 | 0.58 |
| 1502 | 102.831 | 31.172 | 19.9 | 102.802 | 31.146 | 19.9 | 102.773 | 31.172 | 20.4 | 102.802 | 31.198 | 20.4 | 0.22 | 0.43 | 0.49 |
| 1503 | 102.802 | 31.146 | 19.9 | 102.773 | 31.120 | 19.9 | 102.744 | 31.146 | 20.4 | 102.773 | 31.172 | 20.4 | 0.07 | 0.58 | 0.59 |
| 1504 | 102.773 | 31.120 | 19.9 | 102.744 | 31.094 | 19.9 | 102.715 | 31.120 | 20.4 | 102.744 | 31.146 | 20.4 | 0.00 | 0.86 | 0.86 |
| 1505 | 102.744 | 31.094 | 19.9 | 102.715 | 31.068 | 19.9 | 102.686 | 31.094 | 20.4 | 102.715 | 31.120 | 20.4 | 0.00 | 1.00 | 1.00 |
| 1506 | 102.715 | 31.068 | 19.9 | 102.686 | 31.042 | 19.9 | 102.657 | 31.068 | 20.4 | 102.686 | 31.094 | 20.4 | 0.00 | 0.09 | 0.09 |
| 1507 | 104.042 | 32.314 | 20.4 | 104.013 | 32.288 | 20.4 | 103.984 | 32.314 | 20.8 | 104.013 | 32.340 | 20.8 | 0.01 | 0.04 | 0.04 |
| 1508 | 104.013 | 32.288 | 20.4 | 103.984 | 32.262 | 20.4 | 103.955 | 32.288 | 20.8 | 103.984 | 32.314 | 20.8 | 0.16 | 1.00 | 1.01 |
| 1509 | 103.984 | 32.262 | 20.4 | 103.955 | 32.236 | 20.4 | 103.926 | 32.262 | 20.8 | 103.955 | 32.288 | 20.8 | 0.32 | 0.82 | 0.88 |
| 1510 | 103.955 | 32.236 | 20.4 | 103.926 | 32.210 | 20.4 | 103.897 | 32.236 | 20.8 | 103.926 | 32.262 | 20.8 | 0.48 | 0.57 | 0.75 |
| 1511 | 103.926 | 32.210 | 20.4 | 103.897 | 32.184 | 20.4 | 103.868 | 32.210 | 20.8 | 103.897 | 32.236 | 20.8 | 0.59 | 0.46 | 0.75 |
| 1512 | 103.897 | 32.184 | 20.4 | 103.868 | 32.158 | 20.4 | 103.839 | 32.184 | 20.8 | 103.868 | 32.210 | 20.8 | 0.61 | 0.50 | 0.79 |
| 1513 | 103.868 | 32.158 | 20.4 | 103.840 | 32.132 | 20.4 | 103.811 | 32.158 | 20.8 | 103.839 | 32.184 | 20.8 | 0.55 | 0.71 | 0.90 |
| 1514 | 103.840 | 32.132 | 20.4 | 103.811 | 32.106 | 20.4 | 103.782 | 32.132 | 20.8 | 103.811 | 32.158 | 20.8 | 0.45 | 0.90 | 1.00 |
| 1515 | 103.811 | 32.106 | 20.4 | 103.782 | 32.080 | 20.4 | 103.753 | 32.106 | 20.8 | 103.782 | 32.132 | 20.8 | 0.37 | 0.00 | 0.37 |
| 1516 | 103.782 | 32.080 | 20.4 | 103.753 | 32.054 | 20.4 | 103.724 | 32.080 | 20.8 | 103.753 | 32.106 | 20.8 | 0.34 | 0.00 | 0.34 |
| 1517 | 103.753 | 32.054 | 20.4 | 103.724 | 32.028 | 20.4 | 103.695 | 32.054 | 20.8 | 103.724 | 32.080 | 20.8 | 0.35 | 0.00 | 0.35 |
| 1518 | 103.724 | 32.028 | 20.4 | 103.695 | 32.002 | 20.4 | 103.666 | 32.028 | 20.8 | 103.695 | 32.054 | 20.8 | 0.37 | 0.00 | 0.37 |
| 1519 | 103.695 | 32.002 | 20.4 | 103.666 | 31.976 | 20.4 | 103.637 | 32.002 | 20.8 | 103.666 | 32.028 | 20.8 | 0.37 | 0.00 | 0.37 |
| 1520 | 103.666 | 31.976 | 20.4 | 103.638 | 31.950 | 20.4 | 103.608 | 31.976 | 20.8 | 103.637 | 32.002 | 20.8 | 0.35 | 0.00 | 0.35 |
| 1521 | 103.638 | 31.950 | 20.4 | 103.609 | 31.924 | 20.4 | 103.579 | 31.950 | 20.8 | 103.608 | 31.976 | 20.8 | 0.32 | 0.00 | 0.32 |
| 1522 | 103.609 | 31.924 | 20.4 | 103.580 | 31.898 | 20.4 | 103.551 | 31.924 | 20.8 | 103.580 | 31.950 | 20.8 | 0.29 | 0.00 | 0.29 |
| 1523 | 103.580 | 31.898 | 20.4 | 103.551 | 31.872 | 20.4 | 103.522 | 31.898 | 20.8 | 103.551 | 31.924 | 20.8 | 0.25 | 0.00 | 0.25 |
| 1524 | 103.551 | 31.872 | 20.4 | 103.522 | 31.846 | 20.4 | 103.493 | 31.872 | 20.8 | 103.522 | 31.898 | 20.8 | 0.23 | 0.00 | 0.23 |
| 1525 | 103.522 | 31.846 | 20.4 | 103.493 | 31.820 | 20.4 | 103.464 | 31.846 | 20.8 | 103.493 | 31.872 | 20.8 | 0.22 | 0.00 | 0.22 |
| 1526 | 103.493 | 31.820 | 20.4 | 103.464 | 31.794 | 20.4 | 103.435 | 31.820 | 20.8 | 103.464 | 31.846 | 20.8 | 0.22 | 0.00 | 0.22 |



|      |         |        |      |         |        |      |         |        |      |         |        |      |      |      |      |
|------|---------|--------|------|---------|--------|------|---------|--------|------|---------|--------|------|------|------|------|
| 1527 | 103.464 | 31.794 | 20.4 | 103.435 | 31.768 | 20.4 | 103.406 | 31.794 | 20.8 | 103.435 | 31.820 | 20.8 | 0.17 | 0.00 | 0.17 |
| 1528 | 103.435 | 31.768 | 20.4 | 103.407 | 31.742 | 20.4 | 103.377 | 31.768 | 20.8 | 103.406 | 31.794 | 20.8 | 0.07 | 0.00 | 0.07 |
| 1529 | 103.407 | 31.742 | 20.4 | 103.378 | 31.716 | 20.4 | 103.349 | 31.742 | 20.8 | 103.377 | 31.768 | 20.8 | 0.00 | 0.00 | 0.00 |
| 1530 | 103.378 | 31.716 | 20.4 | 103.349 | 31.690 | 20.4 | 103.320 | 31.716 | 20.8 | 103.349 | 31.742 | 20.8 | 0.00 | 0.00 | 0.00 |
| 1531 | 103.349 | 31.690 | 20.4 | 103.320 | 31.664 | 20.4 | 103.291 | 31.690 | 20.8 | 103.320 | 31.716 | 20.8 | 0.00 | 0.00 | 0.00 |
| 1532 | 103.320 | 31.664 | 20.4 | 103.291 | 31.638 | 20.4 | 103.262 | 31.664 | 20.8 | 103.291 | 31.690 | 20.8 | 0.00 | 0.00 | 0.00 |
| 1533 | 103.291 | 31.638 | 20.4 | 103.262 | 31.612 | 20.4 | 103.233 | 31.638 | 20.8 | 103.262 | 31.664 | 20.8 | 0.00 | 0.00 | 0.00 |
| 1534 | 103.262 | 31.612 | 20.4 | 103.233 | 31.586 | 20.4 | 103.204 | 31.612 | 20.8 | 103.233 | 31.638 | 20.8 | 0.00 | 0.00 | 0.00 |
| 1535 | 103.233 | 31.586 | 20.4 | 103.204 | 31.560 | 20.4 | 103.175 | 31.586 | 20.8 | 103.204 | 31.612 | 20.8 | 0.00 | 0.00 | 0.00 |
| 1536 | 103.204 | 31.560 | 20.4 | 103.176 | 31.534 | 20.4 | 103.147 | 31.560 | 20.8 | 103.175 | 31.586 | 20.8 | 0.00 | 0.07 | 0.07 |
| 1537 | 103.176 | 31.534 | 20.4 | 103.147 | 31.508 | 20.4 | 103.118 | 31.534 | 20.8 | 103.147 | 31.560 | 20.8 | 0.00 | 0.20 | 0.20 |
| 1538 | 103.147 | 31.508 | 20.4 | 103.118 | 31.482 | 20.4 | 103.089 | 31.508 | 20.8 | 103.118 | 31.534 | 20.8 | 0.00 | 0.68 | 0.68 |
| 1539 | 103.118 | 31.482 | 20.4 | 103.089 | 31.456 | 20.4 | 103.060 | 31.482 | 20.8 | 103.089 | 31.508 | 20.8 | 0.00 | 0.67 | 0.67 |
| 1540 | 103.089 | 31.456 | 20.4 | 103.060 | 31.430 | 20.4 | 103.031 | 31.456 | 20.8 | 103.060 | 31.482 | 20.8 | 0.00 | 0.45 | 0.45 |
| 1541 | 103.060 | 31.430 | 20.4 | 103.031 | 31.404 | 20.4 | 103.002 | 31.430 | 20.8 | 103.031 | 31.456 | 20.8 | 0.02 | 0.20 | 0.20 |
| 1542 | 103.031 | 31.404 | 20.4 | 103.002 | 31.378 | 20.4 | 102.973 | 31.404 | 20.8 | 103.002 | 31.430 | 20.8 | 0.13 | 0.04 | 0.13 |
| 1543 | 103.002 | 31.378 | 20.4 | 102.974 | 31.352 | 20.4 | 102.945 | 31.378 | 20.8 | 102.973 | 31.404 | 20.8 | 0.27 | 0.00 | 0.27 |
| 1544 | 102.974 | 31.352 | 20.4 | 102.945 | 31.326 | 20.4 | 102.916 | 31.352 | 20.8 | 102.945 | 31.378 | 20.8 | 0.41 | 0.00 | 0.41 |
| 1545 | 102.945 | 31.326 | 20.4 | 102.916 | 31.300 | 20.4 | 102.887 | 31.326 | 20.8 | 102.916 | 31.352 | 20.8 | 0.55 | 0.00 | 0.55 |
| 1546 | 102.916 | 31.300 | 20.4 | 102.887 | 31.274 | 20.4 | 102.858 | 31.300 | 20.8 | 102.887 | 31.326 | 20.8 | 0.68 | 0.00 | 0.68 |
| 1547 | 102.887 | 31.274 | 20.4 | 102.858 | 31.248 | 20.4 | 102.829 | 31.274 | 20.8 | 102.858 | 31.300 | 20.8 | 0.77 | 0.00 | 0.77 |
| 1548 | 102.858 | 31.248 | 20.4 | 102.829 | 31.222 | 20.4 | 102.800 | 31.248 | 20.8 | 102.829 | 31.274 | 20.8 | 0.78 | 0.00 | 0.78 |
| 1549 | 102.829 | 31.222 | 20.4 | 102.800 | 31.196 | 20.4 | 102.771 | 31.222 | 20.8 | 102.800 | 31.248 | 20.8 | 0.69 | 0.00 | 0.69 |
| 1550 | 102.800 | 31.196 | 20.4 | 102.772 | 31.170 | 20.4 | 102.743 | 31.196 | 20.8 | 102.771 | 31.222 | 20.8 | 0.51 | 0.00 | 0.51 |
| 1551 | 102.772 | 31.170 | 20.4 | 102.743 | 31.144 | 20.4 | 102.714 | 31.170 | 20.8 | 102.743 | 31.196 | 20.8 | 0.29 | 0.00 | 0.29 |
| 1552 | 102.743 | 31.144 | 20.4 | 102.714 | 31.118 | 20.4 | 102.685 | 31.144 | 20.8 | 102.714 | 31.170 | 20.8 | 0.11 | 0.04 | 0.12 |
| 1553 | 102.714 | 31.118 | 20.4 | 102.685 | 31.092 | 20.4 | 102.656 | 31.118 | 20.8 | 102.685 | 31.144 | 20.8 | 0.02 | 0.27 | 0.27 |
| 1554 | 102.685 | 31.092 | 20.4 | 102.656 | 31.066 | 20.4 | 102.627 | 31.092 | 20.8 | 102.656 | 31.118 | 20.8 | 0.00 | 0.00 | 0.00 |
| 1555 | 104.011 | 32.339 | 20.8 | 103.982 | 32.313 | 20.8 | 103.953 | 32.339 | 21.2 | 103.982 | 32.365 | 21.2 | 0.00 | 0.00 | 0.00 |
| 1556 | 103.982 | 32.313 | 20.8 | 103.954 | 32.287 | 20.8 | 103.924 | 32.313 | 21.2 | 103.953 | 32.339 | 21.2 | 0.11 | 0.24 | 0.27 |
| 1557 | 103.954 | 32.287 | 20.8 | 103.925 | 32.261 | 20.8 | 103.895 | 32.287 | 21.2 | 103.924 | 32.313 | 21.2 | 0.28 | 0.00 | 0.28 |
| 1558 | 103.925 | 32.261 | 20.8 | 103.896 | 32.235 | 20.8 | 103.867 | 32.261 | 21.2 | 103.895 | 32.287 | 21.2 | 0.47 | 0.00 | 0.47 |
| 1559 | 103.896 | 32.235 | 20.8 | 103.867 | 32.209 | 20.8 | 103.838 | 32.235 | 21.2 | 103.867 | 32.261 | 21.2 | 0.63 | 0.00 | 0.63 |
| 1560 | 103.867 | 32.209 | 20.8 | 103.838 | 32.183 | 20.8 | 103.809 | 32.209 | 21.2 | 103.838 | 32.235 | 21.2 | 0.69 | 0.00 | 0.69 |
| 1561 | 103.838 | 32.183 | 20.8 | 103.809 | 32.157 | 20.8 | 103.780 | 32.183 | 21.2 | 103.809 | 32.209 | 21.2 | 0.64 | 0.00 | 0.64 |
| 1562 | 103.809 | 32.157 | 20.8 | 103.780 | 32.131 | 20.8 | 103.751 | 32.157 | 21.2 | 103.780 | 32.183 | 21.2 | 0.54 | 0.17 | 0.57 |
| 1563 | 103.780 | 32.131 | 20.8 | 103.751 | 32.105 | 20.8 | 103.722 | 32.131 | 21.2 | 103.751 | 32.157 | 21.2 | 0.46 | 0.00 | 0.46 |
| 1564 | 103.751 | 32.105 | 20.8 | 103.722 | 32.079 | 20.8 | 103.693 | 32.105 | 21.2 | 103.722 | 32.131 | 21.2 | 0.43 | 0.00 | 0.43 |
| 1565 | 103.722 | 32.079 | 20.8 | 103.694 | 32.053 | 20.8 | 103.665 | 32.079 | 21.2 | 103.693 | 32.105 | 21.2 | 0.44 | 0.00 | 0.44 |
| 1566 | 103.694 | 32.053 | 20.8 | 103.665 | 32.027 | 20.8 | 103.636 | 32.053 | 21.2 | 103.665 | 32.079 | 21.2 | 0.43 | 0.00 | 0.43 |
| 1567 | 103.665 | 32.027 | 20.8 | 103.636 | 32.001 | 20.8 | 103.607 | 32.027 | 21.2 | 103.636 | 32.053 | 21.2 | 0.39 | 0.00 | 0.39 |
| 1568 | 103.636 | 32.001 | 20.8 | 103.607 | 31.975 | 20.8 | 103.578 | 32.001 | 21.2 | 103.607 | 32.027 | 21.2 | 0.32 | 0.00 | 0.32 |
| 1569 | 103.607 | 31.975 | 20.8 | 103.578 | 31.949 | 20.8 | 103.549 | 31.975 | 21.2 | 103.578 | 32.001 | 21.2 | 0.26 | 0.00 | 0.26 |
| 1570 | 103.578 | 31.949 | 20.8 | 103.549 | 31.923 | 20.8 | 103.520 | 31.949 | 21.2 | 103.549 | 31.975 | 21.2 | 0.22 | 0.00 | 0.22 |
| 1571 | 103.549 | 31.923 | 20.8 | 103.520 | 31.897 | 20.8 | 103.491 | 31.923 | 21.2 | 103.520 | 31.949 | 21.2 | 0.21 | 0.00 | 0.21 |

|      |         |        |      |         |        |      |         |        |      |         |        |      |      |      |      |
|------|---------|--------|------|---------|--------|------|---------|--------|------|---------|--------|------|------|------|------|
| 1572 | 103.520 | 31.897 | 20.8 | 103.492 | 31.871 | 20.8 | 103.463 | 31.897 | 21.2 | 103.491 | 31.923 | 21.2 | 0.23 | 0.00 | 0.23 |
| 1573 | 103.492 | 31.871 | 20.8 | 103.463 | 31.845 | 20.8 | 103.434 | 31.871 | 21.2 | 103.463 | 31.897 | 21.2 | 0.26 | 0.00 | 0.26 |
| 1574 | 103.463 | 31.845 | 20.8 | 103.434 | 31.819 | 20.8 | 103.405 | 31.845 | 21.2 | 103.434 | 31.871 | 21.2 | 0.25 | 0.00 | 0.25 |
| 1575 | 103.434 | 31.819 | 20.8 | 103.405 | 31.793 | 20.8 | 103.376 | 31.819 | 21.2 | 103.405 | 31.845 | 21.2 | 0.18 | 0.00 | 0.18 |
| 1576 | 103.405 | 31.793 | 20.8 | 103.376 | 31.767 | 20.8 | 103.347 | 31.793 | 21.2 | 103.376 | 31.819 | 21.2 | 0.08 | 0.00 | 0.08 |
| 1577 | 103.376 | 31.767 | 20.8 | 103.347 | 31.741 | 20.8 | 103.318 | 31.767 | 21.2 | 103.347 | 31.793 | 21.2 | 0.00 | 0.00 | 0.00 |
| 1578 | 103.347 | 31.741 | 20.8 | 103.318 | 31.715 | 20.8 | 103.289 | 31.741 | 21.2 | 103.318 | 31.767 | 21.2 | 0.00 | 0.00 | 0.00 |
| 1579 | 103.318 | 31.715 | 20.8 | 103.290 | 31.689 | 20.8 | 103.260 | 31.715 | 21.2 | 103.289 | 31.741 | 21.2 | 0.00 | 0.00 | 0.00 |
| 1580 | 103.290 | 31.689 | 20.8 | 103.261 | 31.663 | 20.8 | 103.232 | 31.689 | 21.2 | 103.260 | 31.715 | 21.2 | 0.00 | 0.00 | 0.00 |
| 1581 | 103.261 | 31.663 | 20.8 | 103.232 | 31.637 | 20.8 | 103.203 | 31.663 | 21.2 | 103.232 | 31.689 | 21.2 | 0.00 | 0.00 | 0.00 |
| 1582 | 103.232 | 31.637 | 20.8 | 103.203 | 31.611 | 20.8 | 103.174 | 31.637 | 21.2 | 103.203 | 31.663 | 21.2 | 0.00 | 0.00 | 0.00 |
| 1583 | 103.203 | 31.611 | 20.8 | 103.174 | 31.585 | 20.8 | 103.145 | 31.611 | 21.2 | 103.174 | 31.637 | 21.2 | 0.00 | 0.00 | 0.00 |
| 1584 | 103.174 | 31.585 | 20.8 | 103.145 | 31.559 | 20.8 | 103.116 | 31.585 | 21.2 | 103.145 | 31.611 | 21.2 | 0.00 | 0.00 | 0.00 |
| 1585 | 103.145 | 31.559 | 20.8 | 103.116 | 31.533 | 20.8 | 103.087 | 31.559 | 21.2 | 103.116 | 31.585 | 21.2 | 0.00 | 0.00 | 0.00 |
| 1586 | 103.116 | 31.533 | 20.8 | 103.088 | 31.507 | 20.8 | 103.058 | 31.533 | 21.2 | 103.087 | 31.559 | 21.2 | 0.00 | 0.49 | 0.49 |
| 1587 | 103.088 | 31.507 | 20.8 | 103.059 | 31.481 | 20.8 | 103.029 | 31.507 | 21.2 | 103.058 | 31.533 | 21.2 | 0.00 | 0.52 | 0.52 |
| 1588 | 103.059 | 31.481 | 20.8 | 103.030 | 31.455 | 20.8 | 103.001 | 31.481 | 21.2 | 103.029 | 31.507 | 21.2 | 0.00 | 0.34 | 0.34 |
| 1589 | 103.030 | 31.455 | 20.8 | 103.001 | 31.429 | 20.8 | 102.972 | 31.455 | 21.2 | 103.001 | 31.481 | 21.2 | 0.00 | 0.13 | 0.13 |
| 1590 | 103.001 | 31.429 | 20.8 | 102.972 | 31.403 | 20.8 | 102.943 | 31.429 | 21.2 | 102.972 | 31.455 | 21.2 | 0.00 | 0.00 | 0.00 |
| 1591 | 102.972 | 31.403 | 20.8 | 102.943 | 31.377 | 20.8 | 102.914 | 31.403 | 21.2 | 102.943 | 31.429 | 21.2 | 0.05 | 0.00 | 0.05 |
| 1592 | 102.943 | 31.377 | 20.8 | 102.914 | 31.351 | 20.8 | 102.885 | 31.377 | 21.2 | 102.914 | 31.403 | 21.2 | 0.15 | 0.00 | 0.15 |
| 1593 | 102.914 | 31.351 | 20.8 | 102.885 | 31.325 | 20.8 | 102.856 | 31.351 | 21.2 | 102.885 | 31.377 | 21.2 | 0.31 | 0.00 | 0.31 |
| 1594 | 102.885 | 31.325 | 20.8 | 102.857 | 31.299 | 20.8 | 102.828 | 31.325 | 21.2 | 102.856 | 31.351 | 21.2 | 0.51 | 0.00 | 0.51 |
| 1595 | 102.857 | 31.299 | 20.8 | 102.828 | 31.273 | 20.8 | 102.799 | 31.299 | 21.2 | 102.828 | 31.325 | 21.2 | 0.70 | 0.00 | 0.70 |
| 1596 | 102.828 | 31.273 | 20.8 | 102.799 | 31.247 | 20.8 | 102.770 | 31.273 | 21.2 | 102.799 | 31.299 | 21.2 | 0.82 | 0.00 | 0.82 |
| 1597 | 102.799 | 31.247 | 20.8 | 102.770 | 31.221 | 20.8 | 102.741 | 31.247 | 21.2 | 102.770 | 31.273 | 21.2 | 0.83 | 0.00 | 0.83 |
| 1598 | 102.770 | 31.221 | 20.8 | 102.741 | 31.195 | 20.8 | 102.712 | 31.221 | 21.2 | 102.741 | 31.247 | 21.2 | 0.71 | 0.00 | 0.71 |
| 1599 | 102.741 | 31.195 | 20.8 | 102.712 | 31.169 | 20.8 | 102.683 | 31.195 | 21.2 | 102.712 | 31.221 | 21.2 | 0.50 | 0.00 | 0.50 |
| 1600 | 102.712 | 31.169 | 20.8 | 102.683 | 31.143 | 20.8 | 102.654 | 31.169 | 21.2 | 102.683 | 31.195 | 21.2 | 0.26 | 0.00 | 0.26 |
| 1601 | 102.683 | 31.143 | 20.8 | 102.655 | 31.117 | 20.8 | 102.626 | 31.142 | 21.2 | 102.654 | 31.169 | 21.2 | 0.09 | 0.18 | 0.20 |
| 1602 | 102.655 | 31.117 | 20.8 | 102.626 | 31.091 | 20.8 | 102.597 | 31.116 | 21.2 | 102.626 | 31.142 | 21.2 | 0.00 | 0.00 | 0.00 |
| 1603 | 103.981 | 32.364 | 21.2 | 103.952 | 32.338 | 21.2 | 103.923 | 32.364 | 21.6 | 103.952 | 32.390 | 21.6 | 0.00 | 0.00 | 0.00 |
| 1604 | 103.952 | 32.338 | 21.2 | 103.923 | 32.312 | 21.2 | 103.894 | 32.338 | 21.6 | 103.923 | 32.364 | 21.6 | 0.05 | 0.21 | 0.22 |
| 1605 | 103.923 | 32.312 | 21.2 | 103.894 | 32.286 | 21.2 | 103.865 | 32.312 | 21.6 | 103.894 | 32.338 | 21.6 | 0.20 | 0.00 | 0.20 |
| 1606 | 103.894 | 32.286 | 21.2 | 103.865 | 32.260 | 21.2 | 103.836 | 32.286 | 21.6 | 103.865 | 32.312 | 21.6 | 0.41 | 0.00 | 0.41 |
| 1607 | 103.865 | 32.260 | 21.2 | 103.836 | 32.234 | 21.2 | 103.807 | 32.260 | 21.6 | 103.836 | 32.286 | 21.6 | 0.60 | 0.00 | 0.60 |
| 1608 | 103.836 | 32.234 | 21.2 | 103.808 | 32.208 | 21.2 | 103.778 | 32.234 | 21.6 | 103.807 | 32.260 | 21.6 | 0.67 | 0.00 | 0.67 |
| 1609 | 103.808 | 32.208 | 21.2 | 103.779 | 32.182 | 21.2 | 103.749 | 32.208 | 21.6 | 103.778 | 32.234 | 21.6 | 0.63 | 0.04 | 0.63 |
| 1610 | 103.779 | 32.182 | 21.2 | 103.750 | 32.156 | 21.2 | 103.721 | 32.182 | 21.6 | 103.749 | 32.208 | 21.6 | 0.53 | 0.19 | 0.57 |
| 1611 | 103.750 | 32.156 | 21.2 | 103.721 | 32.130 | 21.2 | 103.692 | 32.156 | 21.6 | 103.721 | 32.182 | 21.6 | 0.46 | 0.00 | 0.46 |
| 1612 | 103.721 | 32.130 | 21.2 | 103.692 | 32.104 | 21.2 | 103.663 | 32.130 | 21.6 | 103.692 | 32.156 | 21.6 | 0.43 | 0.00 | 0.43 |
| 1613 | 103.692 | 32.104 | 21.2 | 103.663 | 32.078 | 21.2 | 103.634 | 32.104 | 21.6 | 103.663 | 32.130 | 21.6 | 0.45 | 0.00 | 0.45 |
| 1614 | 103.663 | 32.078 | 21.2 | 103.634 | 32.052 | 21.2 | 103.605 | 32.078 | 21.6 | 103.634 | 32.104 | 21.6 | 0.45 | 0.00 | 0.45 |
| 1615 | 103.634 | 32.052 | 21.2 | 103.605 | 32.026 | 21.2 | 103.576 | 32.051 | 21.6 | 103.605 | 32.078 | 21.6 | 0.39 | 0.00 | 0.39 |
| 1616 | 103.605 | 32.026 | 21.2 | 103.577 | 32.000 | 21.2 | 103.547 | 32.026 | 21.6 | 103.576 | 32.051 | 21.6 | 0.30 | 0.00 | 0.30 |

|      |         |        |      |         |        |      |         |        |      |         |        |      |      |      |      |
|------|---------|--------|------|---------|--------|------|---------|--------|------|---------|--------|------|------|------|------|
| 1617 | 103.577 | 32.000 | 21.2 | 103.548 | 31.974 | 21.2 | 103.519 | 32.000 | 21.6 | 103.547 | 32.026 | 21.6 | 0.22 | 0.00 | 0.22 |
| 1618 | 103.548 | 31.974 | 21.2 | 103.519 | 31.948 | 21.2 | 103.490 | 31.974 | 21.6 | 103.519 | 32.000 | 21.6 | 0.18 | 0.00 | 0.18 |
| 1619 | 103.519 | 31.948 | 21.2 | 103.490 | 31.922 | 21.2 | 103.461 | 31.948 | 21.6 | 103.490 | 31.974 | 21.6 | 0.19 | 0.00 | 0.19 |
| 1620 | 103.490 | 31.922 | 21.2 | 103.461 | 31.896 | 21.2 | 103.432 | 31.922 | 21.6 | 103.461 | 31.948 | 21.6 | 0.24 | 0.00 | 0.24 |
| 1621 | 103.461 | 31.896 | 21.2 | 103.432 | 31.870 | 21.2 | 103.403 | 31.895 | 21.6 | 103.432 | 31.922 | 21.6 | 0.28 | 0.00 | 0.28 |
| 1622 | 103.432 | 31.870 | 21.2 | 103.403 | 31.844 | 21.2 | 103.374 | 31.869 | 21.6 | 103.403 | 31.895 | 21.6 | 0.27 | 0.00 | 0.27 |
| 1623 | 103.403 | 31.844 | 21.2 | 103.374 | 31.818 | 21.2 | 103.345 | 31.843 | 21.6 | 103.374 | 31.869 | 21.6 | 0.20 | 0.00 | 0.20 |
| 1624 | 103.374 | 31.818 | 21.2 | 103.346 | 31.792 | 21.2 | 103.317 | 31.817 | 21.6 | 103.345 | 31.843 | 21.6 | 0.09 | 0.00 | 0.09 |
| 1625 | 103.346 | 31.792 | 21.2 | 103.317 | 31.766 | 21.2 | 103.288 | 31.791 | 21.6 | 103.317 | 31.817 | 21.6 | 0.01 | 0.00 | 0.01 |
| 1626 | 103.317 | 31.766 | 21.2 | 103.288 | 31.740 | 21.2 | 103.259 | 31.765 | 21.6 | 103.288 | 31.791 | 21.6 | 0.00 | 0.00 | 0.00 |
| 1627 | 103.288 | 31.740 | 21.2 | 103.259 | 31.714 | 21.2 | 103.230 | 31.739 | 21.6 | 103.259 | 31.765 | 21.6 | 0.00 | 0.00 | 0.00 |
| 1628 | 103.259 | 31.714 | 21.2 | 103.230 | 31.688 | 21.2 | 103.201 | 31.713 | 21.6 | 103.230 | 31.739 | 21.6 | 0.00 | 0.00 | 0.00 |
| 1629 | 103.230 | 31.688 | 21.2 | 103.201 | 31.662 | 21.2 | 103.172 | 31.687 | 21.6 | 103.201 | 31.713 | 21.6 | 0.00 | 0.00 | 0.00 |
| 1630 | 103.201 | 31.662 | 21.2 | 103.172 | 31.636 | 21.2 | 103.143 | 31.661 | 21.6 | 103.172 | 31.687 | 21.6 | 0.00 | 0.00 | 0.00 |
| 1631 | 103.172 | 31.636 | 21.2 | 103.144 | 31.610 | 21.2 | 103.115 | 31.635 | 21.6 | 103.143 | 31.661 | 21.6 | 0.00 | 0.00 | 0.00 |
| 1632 | 103.144 | 31.610 | 21.2 | 103.115 | 31.584 | 21.2 | 103.086 | 31.609 | 21.6 | 103.115 | 31.635 | 21.6 | 0.00 | 0.00 | 0.00 |
| 1633 | 103.115 | 31.584 | 21.2 | 103.086 | 31.558 | 21.2 | 103.057 | 31.583 | 21.6 | 103.086 | 31.609 | 21.6 | 0.00 | 0.02 | 0.02 |
| 1634 | 103.086 | 31.558 | 21.2 | 103.057 | 31.532 | 21.2 | 103.028 | 31.557 | 21.6 | 103.057 | 31.583 | 21.6 | 0.00 | 0.62 | 0.62 |
| 1635 | 103.057 | 31.532 | 21.2 | 103.028 | 31.506 | 21.2 | 102.999 | 31.531 | 21.6 | 103.028 | 31.557 | 21.6 | 0.00 | 0.73 | 0.73 |
| 1636 | 103.028 | 31.506 | 21.2 | 102.999 | 31.480 | 21.2 | 102.970 | 31.505 | 21.6 | 102.999 | 31.531 | 21.6 | 0.00 | 0.63 | 0.63 |
| 1637 | 102.999 | 31.480 | 21.2 | 102.970 | 31.453 | 21.2 | 102.941 | 31.479 | 21.6 | 102.970 | 31.505 | 21.6 | 0.00 | 0.50 | 0.50 |
| 1638 | 102.970 | 31.453 | 21.2 | 102.942 | 31.427 | 21.2 | 102.912 | 31.453 | 21.6 | 102.941 | 31.479 | 21.6 | 0.00 | 0.40 | 0.40 |
| 1639 | 102.942 | 31.427 | 21.2 | 102.913 | 31.401 | 21.2 | 102.884 | 31.427 | 21.6 | 102.912 | 31.453 | 21.6 | 0.00 | 0.38 | 0.38 |
| 1640 | 102.913 | 31.401 | 21.2 | 102.884 | 31.375 | 21.2 | 102.855 | 31.401 | 21.6 | 102.884 | 31.427 | 21.6 | 0.02 | 0.36 | 0.36 |
| 1641 | 102.884 | 31.375 | 21.2 | 102.855 | 31.349 | 21.2 | 102.826 | 31.375 | 21.6 | 102.855 | 31.401 | 21.6 | 0.12 | 0.31 | 0.34 |
| 1642 | 102.855 | 31.349 | 21.2 | 102.826 | 31.323 | 21.2 | 102.797 | 31.349 | 21.6 | 102.826 | 31.375 | 21.6 | 0.31 | 0.24 | 0.39 |
| 1643 | 102.826 | 31.323 | 21.2 | 102.797 | 31.297 | 21.2 | 102.768 | 31.323 | 21.6 | 102.797 | 31.349 | 21.6 | 0.52 | 0.15 | 0.54 |
| 1644 | 102.797 | 31.297 | 21.2 | 102.768 | 31.271 | 21.2 | 102.739 | 31.297 | 21.6 | 102.768 | 31.323 | 21.6 | 0.70 | 0.05 | 0.71 |
| 1645 | 102.768 | 31.271 | 21.2 | 102.740 | 31.245 | 21.2 | 102.710 | 31.271 | 21.6 | 102.739 | 31.297 | 21.6 | 0.78 | 0.00 | 0.78 |
| 1646 | 102.740 | 31.245 | 21.2 | 102.711 | 31.219 | 21.2 | 102.682 | 31.245 | 21.6 | 102.710 | 31.271 | 21.6 | 0.73 | 0.00 | 0.73 |
| 1647 | 102.711 | 31.219 | 21.2 | 102.682 | 31.193 | 21.2 | 102.653 | 31.219 | 21.6 | 102.682 | 31.245 | 21.6 | 0.56 | 0.00 | 0.56 |
| 1648 | 102.682 | 31.193 | 21.2 | 102.653 | 31.167 | 21.2 | 102.624 | 31.193 | 21.6 | 102.653 | 31.219 | 21.6 | 0.34 | 0.03 | 0.34 |
| 1649 | 102.653 | 31.167 | 21.2 | 102.624 | 31.141 | 21.2 | 102.595 | 31.167 | 21.6 | 102.624 | 31.193 | 21.6 | 0.13 | 0.24 | 0.27 |
| 1650 | 102.624 | 31.141 | 21.2 | 102.595 | 31.115 | 21.2 | 102.566 | 31.141 | 21.6 | 102.595 | 31.167 | 21.6 | 0.00 | 0.00 | 0.00 |
| 1651 | 103.950 | 32.389 | 21.6 | 103.921 | 32.362 | 21.6 | 103.892 | 32.389 | 22.0 | 103.921 | 32.414 | 22.0 | 0.00 | 0.00 | 0.00 |
| 1652 | 103.921 | 32.362 | 21.6 | 103.892 | 32.337 | 21.6 | 103.863 | 32.362 | 22.0 | 103.892 | 32.389 | 22.0 | 0.00 | 0.40 | 0.40 |
| 1653 | 103.892 | 32.337 | 21.6 | 103.864 | 32.310 | 21.6 | 103.835 | 32.337 | 22.0 | 103.863 | 32.362 | 22.0 | 0.11 | 0.25 | 0.28 |
| 1654 | 103.864 | 32.310 | 21.6 | 103.835 | 32.285 | 21.6 | 103.806 | 32.310 | 22.0 | 103.835 | 32.336 | 22.0 | 0.30 | 0.19 | 0.36 |
| 1655 | 103.835 | 32.285 | 21.6 | 103.806 | 32.258 | 21.6 | 103.777 | 32.284 | 22.0 | 103.806 | 32.310 | 22.0 | 0.48 | 0.21 | 0.52 |
| 1656 | 103.806 | 32.258 | 21.6 | 103.777 | 32.233 | 21.6 | 103.748 | 32.258 | 22.0 | 103.777 | 32.284 | 22.0 | 0.55 | 0.29 | 0.63 |
| 1657 | 103.777 | 32.233 | 21.6 | 103.748 | 32.206 | 21.6 | 103.719 | 32.232 | 22.0 | 103.748 | 32.258 | 22.0 | 0.52 | 0.40 | 0.66 |
| 1658 | 103.748 | 32.206 | 21.6 | 103.719 | 32.180 | 21.6 | 103.690 | 32.206 | 22.0 | 103.719 | 32.232 | 22.0 | 0.43 | 0.46 | 0.63 |
| 1659 | 103.719 | 32.180 | 21.6 | 103.690 | 32.154 | 21.6 | 103.661 | 32.180 | 22.0 | 103.690 | 32.206 | 22.0 | 0.36 | 0.05 | 0.36 |
| 1660 | 103.690 | 32.154 | 21.6 | 103.662 | 32.128 | 21.6 | 103.632 | 32.154 | 22.0 | 103.661 | 32.180 | 22.0 | 0.34 | 0.00 | 0.34 |
| 1661 | 103.662 | 32.128 | 21.6 | 103.633 | 32.102 | 21.6 | 103.604 | 32.128 | 22.0 | 103.632 | 32.154 | 22.0 | 0.36 | 0.00 | 0.36 |

|      |         |        |      |         |        |      |         |        |      |         |        |      |      |      |      |
|------|---------|--------|------|---------|--------|------|---------|--------|------|---------|--------|------|------|------|------|
| 1662 | 103.633 | 32.102 | 21.6 | 103.604 | 32.076 | 21.6 | 103.575 | 32.102 | 22.0 | 103.604 | 32.128 | 22.0 | 0.37 | 0.00 | 0.37 |
| 1663 | 103.604 | 32.076 | 21.6 | 103.575 | 32.050 | 21.6 | 103.546 | 32.076 | 22.0 | 103.575 | 32.102 | 22.0 | 0.33 | 0.00 | 0.33 |
| 1664 | 103.575 | 32.050 | 21.6 | 103.546 | 32.024 | 21.6 | 103.517 | 32.050 | 22.0 | 103.546 | 32.076 | 22.0 | 0.25 | 0.00 | 0.25 |
| 1665 | 103.546 | 32.024 | 21.6 | 103.517 | 31.998 | 21.6 | 103.488 | 32.024 | 22.0 | 103.517 | 32.050 | 22.0 | 0.18 | 0.00 | 0.18 |
| 1666 | 103.517 | 31.998 | 21.6 | 103.488 | 31.972 | 21.6 | 103.459 | 31.998 | 22.0 | 103.488 | 32.024 | 22.0 | 0.15 | 0.00 | 0.15 |
| 1667 | 103.488 | 31.972 | 21.6 | 103.460 | 31.946 | 21.6 | 103.430 | 31.972 | 22.0 | 103.459 | 31.998 | 22.0 | 0.17 | 0.00 | 0.17 |
| 1668 | 103.460 | 31.946 | 21.6 | 103.431 | 31.920 | 21.6 | 103.401 | 31.946 | 22.0 | 103.430 | 31.972 | 22.0 | 0.22 | 0.00 | 0.22 |
| 1669 | 103.431 | 31.920 | 21.6 | 103.402 | 31.894 | 21.6 | 103.373 | 31.920 | 22.0 | 103.401 | 31.946 | 22.0 | 0.26 | 0.00 | 0.26 |
| 1670 | 103.402 | 31.894 | 21.6 | 103.373 | 31.868 | 21.6 | 103.344 | 31.894 | 22.0 | 103.373 | 31.920 | 22.0 | 0.25 | 0.00 | 0.25 |
| 1671 | 103.373 | 31.868 | 21.6 | 103.344 | 31.842 | 21.6 | 103.315 | 31.868 | 22.0 | 103.344 | 31.894 | 22.0 | 0.19 | 0.00 | 0.19 |
| 1672 | 103.344 | 31.842 | 21.6 | 103.315 | 31.816 | 21.6 | 103.286 | 31.842 | 22.0 | 103.315 | 31.868 | 22.0 | 0.09 | 0.00 | 0.09 |
| 1673 | 103.315 | 31.816 | 21.6 | 103.286 | 31.790 | 21.6 | 103.257 | 31.816 | 22.0 | 103.286 | 31.842 | 22.0 | 0.01 | 0.00 | 0.01 |
| 1674 | 103.286 | 31.790 | 21.6 | 103.257 | 31.764 | 21.6 | 103.228 | 31.790 | 22.0 | 103.257 | 31.816 | 22.0 | 0.00 | 0.00 | 0.00 |
| 1675 | 103.257 | 31.764 | 21.6 | 103.229 | 31.738 | 21.6 | 103.200 | 31.764 | 22.0 | 103.228 | 31.790 | 22.0 | 0.00 | 0.00 | 0.00 |
| 1676 | 103.229 | 31.738 | 21.6 | 103.200 | 31.712 | 21.6 | 103.171 | 31.738 | 22.0 | 103.200 | 31.764 | 22.0 | 0.00 | 0.00 | 0.00 |
| 1677 | 103.200 | 31.712 | 21.6 | 103.171 | 31.686 | 21.6 | 103.142 | 31.712 | 22.0 | 103.171 | 31.738 | 22.0 | 0.00 | 0.00 | 0.00 |
| 1678 | 103.171 | 31.686 | 21.6 | 103.142 | 31.660 | 21.6 | 103.113 | 31.686 | 22.0 | 103.142 | 31.712 | 22.0 | 0.00 | 0.00 | 0.00 |
| 1679 | 103.142 | 31.660 | 21.6 | 103.113 | 31.634 | 21.6 | 103.084 | 31.660 | 22.0 | 103.113 | 31.686 | 22.0 | 0.00 | 0.00 | 0.00 |
| 1680 | 103.113 | 31.634 | 21.6 | 103.084 | 31.608 | 21.6 | 103.055 | 31.634 | 22.0 | 103.084 | 31.660 | 22.0 | 0.00 | 0.00 | 0.00 |
| 1681 | 103.084 | 31.608 | 21.6 | 103.055 | 31.582 | 21.6 | 103.026 | 31.608 | 22.0 | 103.055 | 31.634 | 22.0 | 0.00 | 0.14 | 0.14 |
| 1682 | 103.055 | 31.582 | 21.6 | 103.026 | 31.556 | 21.6 | 102.998 | 31.582 | 22.0 | 103.026 | 31.608 | 22.0 | 0.00 | 0.82 | 0.82 |
| 1683 | 103.026 | 31.556 | 21.6 | 102.998 | 31.530 | 21.6 | 102.969 | 31.556 | 22.0 | 102.998 | 31.582 | 22.0 | 0.00 | 1.00 | 1.00 |
| 1684 | 102.998 | 31.530 | 21.6 | 102.969 | 31.504 | 21.6 | 102.940 | 31.530 | 22.0 | 102.969 | 31.556 | 22.0 | 0.00 | 0.99 | 0.99 |
| 1685 | 102.969 | 31.504 | 21.6 | 102.940 | 31.478 | 21.6 | 102.911 | 31.504 | 22.0 | 102.940 | 31.530 | 22.0 | 0.00 | 0.94 | 0.94 |
| 1686 | 102.940 | 31.478 | 21.6 | 102.911 | 31.452 | 21.6 | 102.882 | 31.478 | 22.0 | 102.911 | 31.504 | 22.0 | 0.00 | 0.90 | 0.90 |
| 1687 | 102.911 | 31.452 | 21.6 | 102.882 | 31.426 | 21.6 | 102.853 | 31.452 | 22.0 | 102.882 | 31.478 | 22.0 | 0.00 | 0.88 | 0.88 |
| 1688 | 102.882 | 31.426 | 21.6 | 102.853 | 31.400 | 21.6 | 102.824 | 31.426 | 22.0 | 102.853 | 31.452 | 22.0 | 0.00 | 0.85 | 0.85 |
| 1689 | 102.853 | 31.400 | 21.6 | 102.825 | 31.374 | 21.6 | 102.795 | 31.400 | 22.0 | 102.824 | 31.426 | 22.0 | 0.02 | 0.79 | 0.79 |
| 1690 | 102.825 | 31.374 | 21.6 | 102.796 | 31.348 | 21.6 | 102.767 | 31.374 | 22.0 | 102.795 | 31.400 | 22.0 | 0.14 | 0.68 | 0.70 |
| 1691 | 102.796 | 31.348 | 21.6 | 102.767 | 31.322 | 21.6 | 102.738 | 31.348 | 22.0 | 102.767 | 31.374 | 22.0 | 0.32 | 0.53 | 0.62 |
| 1692 | 102.767 | 31.322 | 21.6 | 102.738 | 31.296 | 21.6 | 102.709 | 31.322 | 22.0 | 102.738 | 31.348 | 22.0 | 0.49 | 0.37 | 0.61 |
| 1693 | 102.738 | 31.296 | 21.6 | 102.709 | 31.270 | 21.6 | 102.680 | 31.296 | 22.0 | 102.709 | 31.322 | 22.0 | 0.59 | 0.24 | 0.63 |
| 1694 | 102.709 | 31.270 | 21.6 | 102.680 | 31.244 | 21.6 | 102.651 | 31.270 | 22.0 | 102.680 | 31.296 | 22.0 | 0.58 | 0.16 | 0.60 |
| 1695 | 102.680 | 31.244 | 21.6 | 102.651 | 31.218 | 21.6 | 102.622 | 31.244 | 22.0 | 102.651 | 31.270 | 22.0 | 0.47 | 0.15 | 0.49 |
| 1696 | 102.651 | 31.218 | 21.6 | 102.623 | 31.192 | 21.6 | 102.593 | 31.218 | 22.0 | 102.622 | 31.244 | 22.0 | 0.29 | 0.24 | 0.38 |
| 1697 | 102.623 | 31.192 | 21.6 | 102.594 | 31.166 | 21.6 | 102.565 | 31.191 | 22.0 | 102.593 | 31.218 | 22.0 | 0.12 | 0.40 | 0.42 |
| 1698 | 102.594 | 31.166 | 21.6 | 102.565 | 31.140 | 21.6 | 102.536 | 31.165 | 22.0 | 102.565 | 31.191 | 22.0 | 0.00 | 0.02 | 0.02 |
| 1699 | 103.920 | 32.413 | 22.0 | 103.891 | 32.387 | 22.0 | 103.862 | 32.413 | 22.4 | 103.891 | 32.439 | 22.4 | 0.00 | 0.05 | 0.05 |
| 1700 | 103.891 | 32.387 | 22.0 | 103.862 | 32.361 | 22.0 | 103.833 | 32.387 | 22.4 | 103.862 | 32.413 | 22.4 | 0.00 | 0.53 | 0.53 |
| 1701 | 103.862 | 32.361 | 22.0 | 103.833 | 32.335 | 22.0 | 103.804 | 32.361 | 22.4 | 103.833 | 32.387 | 22.4 | 0.05 | 0.50 | 0.50 |
| 1702 | 103.833 | 32.335 | 22.0 | 103.804 | 32.309 | 22.0 | 103.775 | 32.335 | 22.4 | 103.804 | 32.361 | 22.4 | 0.17 | 0.46 | 0.49 |
| 1703 | 103.804 | 32.309 | 22.0 | 103.775 | 32.283 | 22.0 | 103.746 | 32.309 | 22.4 | 103.775 | 32.335 | 22.4 | 0.28 | 0.49 | 0.56 |
| 1704 | 103.775 | 32.283 | 22.0 | 103.746 | 32.257 | 22.0 | 103.717 | 32.283 | 22.4 | 103.746 | 32.309 | 22.4 | 0.32 | 0.57 | 0.65 |
| 1705 | 103.746 | 32.257 | 22.0 | 103.718 | 32.231 | 22.0 | 103.689 | 32.257 | 22.4 | 103.717 | 32.283 | 22.4 | 0.29 | 0.65 | 0.72 |
| 1706 | 103.718 | 32.231 | 22.0 | 103.689 | 32.205 | 22.0 | 103.660 | 32.231 | 22.4 | 103.689 | 32.257 | 22.4 | 0.23 | 0.63 | 0.67 |

|      |         |        |      |         |        |      |         |        |      |         |        |      |      |      |      |
|------|---------|--------|------|---------|--------|------|---------|--------|------|---------|--------|------|------|------|------|
| 1707 | 103.689 | 32.205 | 22.0 | 103.660 | 32.179 | 22.0 | 103.631 | 32.205 | 22.4 | 103.660 | 32.231 | 22.4 | 0.19 | 0.17 | 0.26 |
| 1708 | 103.660 | 32.179 | 22.0 | 103.631 | 32.153 | 22.0 | 103.602 | 32.179 | 22.4 | 103.631 | 32.205 | 22.4 | 0.18 | 0.07 | 0.19 |
| 1709 | 103.631 | 32.153 | 22.0 | 103.602 | 32.127 | 22.0 | 103.573 | 32.153 | 22.4 | 103.602 | 32.179 | 22.4 | 0.20 | 0.04 | 0.20 |
| 1710 | 103.602 | 32.127 | 22.0 | 103.573 | 32.101 | 22.0 | 103.544 | 32.127 | 22.4 | 103.573 | 32.153 | 22.4 | 0.21 | 0.01 | 0.21 |
| 1711 | 103.573 | 32.101 | 22.0 | 103.544 | 32.075 | 22.0 | 103.515 | 32.101 | 22.4 | 103.544 | 32.127 | 22.4 | 0.19 | 0.00 | 0.19 |
| 1712 | 103.544 | 32.075 | 22.0 | 103.516 | 32.049 | 22.0 | 103.486 | 32.075 | 22.4 | 103.515 | 32.101 | 22.4 | 0.15 | 0.00 | 0.15 |
| 1713 | 103.516 | 32.049 | 22.0 | 103.487 | 32.023 | 22.0 | 103.458 | 32.049 | 22.4 | 103.486 | 32.075 | 22.4 | 0.11 | 0.00 | 0.11 |
| 1714 | 103.487 | 32.023 | 22.0 | 103.458 | 31.997 | 22.0 | 103.429 | 32.023 | 22.4 | 103.458 | 32.049 | 22.4 | 0.09 | 0.00 | 0.09 |
| 1715 | 103.458 | 31.997 | 22.0 | 103.429 | 31.971 | 22.0 | 103.400 | 31.997 | 22.4 | 103.429 | 32.023 | 22.4 | 0.11 | 0.00 | 0.11 |
| 1716 | 103.429 | 31.971 | 22.0 | 103.400 | 31.945 | 22.0 | 103.371 | 31.971 | 22.4 | 103.400 | 31.997 | 22.4 | 0.14 | 0.00 | 0.14 |
| 1717 | 103.400 | 31.945 | 22.0 | 103.371 | 31.919 | 22.0 | 103.342 | 31.945 | 22.4 | 103.371 | 31.971 | 22.4 | 0.17 | 0.00 | 0.17 |
| 1718 | 103.371 | 31.919 | 22.0 | 103.342 | 31.893 | 22.0 | 103.313 | 31.919 | 22.4 | 103.342 | 31.945 | 22.4 | 0.16 | 0.00 | 0.16 |
| 1719 | 103.342 | 31.893 | 22.0 | 103.314 | 31.867 | 22.0 | 103.284 | 31.893 | 22.4 | 103.313 | 31.919 | 22.4 | 0.12 | 0.00 | 0.12 |
| 1720 | 103.314 | 31.867 | 22.0 | 103.285 | 31.841 | 22.0 | 103.256 | 31.867 | 22.4 | 103.284 | 31.893 | 22.4 | 0.06 | 0.00 | 0.06 |
| 1721 | 103.285 | 31.841 | 22.0 | 103.256 | 31.815 | 22.0 | 103.227 | 31.841 | 22.4 | 103.256 | 31.867 | 22.4 | 0.01 | 0.00 | 0.01 |
| 1722 | 103.256 | 31.815 | 22.0 | 103.227 | 31.789 | 22.0 | 103.198 | 31.815 | 22.4 | 103.227 | 31.841 | 22.4 | 0.00 | 0.00 | 0.00 |
| 1723 | 103.227 | 31.789 | 22.0 | 103.198 | 31.763 | 22.0 | 103.169 | 31.789 | 22.4 | 103.198 | 31.815 | 22.4 | 0.00 | 0.00 | 0.00 |
| 1724 | 103.198 | 31.763 | 22.0 | 103.169 | 31.737 | 22.0 | 103.140 | 31.762 | 22.4 | 103.169 | 31.789 | 22.4 | 0.00 | 0.00 | 0.00 |
| 1725 | 103.169 | 31.737 | 22.0 | 103.140 | 31.711 | 22.0 | 103.111 | 31.736 | 22.4 | 103.140 | 31.762 | 22.4 | 0.00 | 0.00 | 0.00 |
| 1726 | 103.140 | 31.711 | 22.0 | 103.112 | 31.685 | 22.0 | 103.082 | 31.710 | 22.4 | 103.111 | 31.736 | 22.4 | 0.00 | 0.02 | 0.02 |
| 1727 | 103.112 | 31.685 | 22.0 | 103.083 | 31.659 | 22.0 | 103.053 | 31.684 | 22.4 | 103.082 | 31.710 | 22.4 | 0.00 | 0.03 | 0.03 |
| 1728 | 103.083 | 31.659 | 22.0 | 103.054 | 31.633 | 22.0 | 103.025 | 31.658 | 22.4 | 103.053 | 31.684 | 22.4 | 0.00 | 0.06 | 0.06 |
| 1729 | 103.054 | 31.633 | 22.0 | 103.025 | 31.607 | 22.0 | 102.996 | 31.632 | 22.4 | 103.025 | 31.658 | 22.4 | 0.00 | 0.22 | 0.22 |
| 1730 | 103.025 | 31.607 | 22.0 | 102.996 | 31.581 | 22.0 | 102.967 | 31.606 | 22.4 | 102.996 | 31.632 | 22.4 | 0.00 | 0.82 | 0.82 |
| 1731 | 102.996 | 31.581 | 22.0 | 102.967 | 31.555 | 22.0 | 102.938 | 31.580 | 22.4 | 102.967 | 31.606 | 22.4 | 0.00 | 0.99 | 0.99 |
| 1732 | 102.967 | 31.555 | 22.0 | 102.938 | 31.529 | 22.0 | 102.909 | 31.554 | 22.4 | 102.938 | 31.580 | 22.4 | 0.00 | 1.00 | 1.00 |
| 1733 | 102.938 | 31.529 | 22.0 | 102.909 | 31.503 | 22.0 | 102.880 | 31.528 | 22.4 | 102.909 | 31.554 | 22.4 | 0.00 | 1.00 | 1.00 |
| 1734 | 102.909 | 31.503 | 22.0 | 102.881 | 31.477 | 22.0 | 102.852 | 31.502 | 22.4 | 102.880 | 31.528 | 22.4 | 0.00 | 1.00 | 1.00 |
| 1735 | 102.881 | 31.477 | 22.0 | 102.852 | 31.451 | 22.0 | 102.823 | 31.476 | 22.4 | 102.852 | 31.502 | 22.4 | 0.00 | 1.00 | 1.00 |
| 1736 | 102.852 | 31.451 | 22.0 | 102.823 | 31.424 | 22.0 | 102.794 | 31.450 | 22.4 | 102.823 | 31.476 | 22.4 | 0.00 | 0.99 | 0.99 |
| 1737 | 102.823 | 31.424 | 22.0 | 102.794 | 31.398 | 22.0 | 102.765 | 31.424 | 22.4 | 102.794 | 31.450 | 22.4 | 0.00 | 0.94 | 0.94 |
| 1738 | 102.794 | 31.398 | 22.0 | 102.765 | 31.372 | 22.0 | 102.736 | 31.398 | 22.4 | 102.765 | 31.424 | 22.4 | 0.04 | 0.86 | 0.86 |
| 1739 | 102.765 | 31.372 | 22.0 | 102.736 | 31.346 | 22.0 | 102.707 | 31.372 | 22.4 | 102.736 | 31.398 | 22.4 | 0.14 | 0.75 | 0.76 |
| 1740 | 102.736 | 31.346 | 22.0 | 102.707 | 31.320 | 22.0 | 102.678 | 31.346 | 22.4 | 102.707 | 31.372 | 22.4 | 0.24 | 0.62 | 0.67 |
| 1741 | 102.707 | 31.320 | 22.0 | 102.679 | 31.294 | 22.0 | 102.650 | 31.320 | 22.4 | 102.678 | 31.346 | 22.4 | 0.31 | 0.51 | 0.59 |
| 1742 | 102.679 | 31.294 | 22.0 | 102.650 | 31.268 | 22.0 | 102.621 | 31.294 | 22.4 | 102.650 | 31.320 | 22.4 | 0.31 | 0.43 | 0.53 |
| 1743 | 102.650 | 31.268 | 22.0 | 102.621 | 31.242 | 22.0 | 102.592 | 31.268 | 22.4 | 102.621 | 31.294 | 22.4 | 0.26 | 0.41 | 0.49 |
| 1744 | 102.621 | 31.242 | 22.0 | 102.592 | 31.216 | 22.0 | 102.563 | 31.242 | 22.4 | 102.592 | 31.268 | 22.4 | 0.16 | 0.47 | 0.50 |
| 1745 | 102.592 | 31.216 | 22.0 | 102.563 | 31.190 | 22.0 | 102.534 | 31.216 | 22.4 | 102.563 | 31.242 | 22.4 | 0.07 | 0.54 | 0.55 |
| 1746 | 102.563 | 31.190 | 22.0 | 102.534 | 31.164 | 22.0 | 102.505 | 31.190 | 22.4 | 102.534 | 31.216 | 22.4 | 0.00 | 0.20 | 0.20 |

#

# Pengguan Fault

#

| Sub-Fault No | Upper-left corner |          |            | Upper-right corner |          |            | Lower-right corner |          |            | Lower-left corner |          |            | Slip Estimate |         |          |
|--------------|-------------------|----------|------------|--------------------|----------|------------|--------------------|----------|------------|-------------------|----------|------------|---------------|---------|----------|
|              | Long. deg         | Lat. deg | Depth (km) | Long. deg          | Lat. deg | Depth (km) | Long. deg          | Lat. deg | Depth (km) | Long. deg         | Lat. deg | Depth (km) | Strike (m)    | Dip (m) | Amp. (m) |
| 1747         | 104.588           | 31.860   | 0.0        | 104.560            | 31.833   | 0.0        | 104.542            | 31.850   | 1.6        | 104.570           | 31.877   | 1.6        | 0.60          | 0.00    | 0.60     |
| 1748         | 104.560           | 31.833   | 0.0        | 104.532            | 31.806   | 0.0        | 104.514            | 31.823   | 1.6        | 104.542           | 31.850   | 1.6        | 0.00          | 0.41    | 0.41     |
| 1749         | 104.532           | 31.806   | 0.0        | 104.504            | 31.780   | 0.0        | 104.486            | 31.797   | 1.6        | 104.514           | 31.823   | 1.6        | 0.00          | 0.85    | 0.85     |
| 1750         | 104.504           | 31.780   | 0.0        | 104.476            | 31.753   | 0.0        | 104.458            | 31.770   | 1.6        | 104.486           | 31.797   | 1.6        | 0.00          | 1.59    | 1.59     |
| 1751         | 104.476           | 31.753   | 0.0        | 104.448            | 31.727   | 0.0        | 104.430            | 31.743   | 1.6        | 104.458           | 31.770   | 1.6        | 0.00          | 1.09    | 1.09     |
| 1752         | 104.448           | 31.727   | 0.0        | 104.420            | 31.700   | 0.0        | 104.402            | 31.717   | 1.6        | 104.430           | 31.743   | 1.6        | 0.00          | 0.92    | 0.92     |
| 1753         | 104.420           | 31.700   | 0.0        | 104.392            | 31.673   | 0.0        | 104.374            | 31.690   | 1.6        | 104.402           | 31.717   | 1.6        | 0.00          | 3.11    | 3.11     |
| 1754         | 104.392           | 31.673   | 0.0        | 104.364            | 31.646   | 0.0        | 104.346            | 31.663   | 1.6        | 104.374           | 31.690   | 1.6        | 0.00          | 3.66    | 3.66     |
| 1755         | 104.364           | 31.646   | 0.0        | 104.336            | 31.620   | 0.0        | 104.318            | 31.637   | 1.6        | 104.346           | 31.663   | 1.6        | 0.00          | 2.30    | 2.30     |
| 1756         | 104.336           | 31.620   | 0.0        | 104.308            | 31.593   | 0.0        | 104.290            | 31.610   | 1.6        | 104.318           | 31.637   | 1.6        | 0.00          | 1.08    | 1.08     |
| 1757         | 104.308           | 31.593   | 0.0        | 104.280            | 31.567   | 0.0        | 104.262            | 31.583   | 1.6        | 104.290           | 31.610   | 1.6        | 0.00          | 0.60    | 0.60     |
| 1758         | 104.280           | 31.567   | 0.0        | 104.252            | 31.540   | 0.0        | 104.234            | 31.557   | 1.6        | 104.262           | 31.583   | 1.6        | 0.00          | 0.50    | 0.50     |
| 1759         | 104.252           | 31.540   | 0.0        | 104.224            | 31.513   | 0.0        | 104.206            | 31.530   | 1.6        | 104.234           | 31.557   | 1.6        | 0.00          | 0.00    | 0.00     |
| 1760         | 104.224           | 31.513   | 0.0        | 104.195            | 31.486   | 0.0        | 104.178            | 31.503   | 1.6        | 104.206           | 31.530   | 1.6        | 0.00          | 0.00    | 0.00     |
| 1761         | 104.195           | 31.486   | 0.0        | 104.168            | 31.460   | 0.0        | 104.150            | 31.477   | 1.6        | 104.178           | 31.503   | 1.6        | 0.00          | 0.17    | 0.17     |
| 1762         | 104.168           | 31.460   | 0.0        | 104.139            | 31.433   | 0.0        | 104.122            | 31.450   | 1.6        | 104.150           | 31.477   | 1.6        | 0.28          | 0.97    | 1.01     |
| 1763         | 104.139           | 31.433   | 0.0        | 104.111            | 31.407   | 0.0        | 104.094            | 31.423   | 1.6        | 104.122           | 31.450   | 1.6        | 1.52          | 2.38    | 2.83     |
| 1764         | 104.111           | 31.407   | 0.0        | 104.083            | 31.380   | 0.0        | 104.066            | 31.397   | 1.6        | 104.094           | 31.423   | 1.6        | 1.95          | 3.78    | 4.26     |
| 1765         | 104.083           | 31.380   | 0.0        | 104.055            | 31.353   | 0.0        | 104.038            | 31.370   | 1.6        | 104.066           | 31.397   | 1.6        | 1.03          | 4.18    | 4.31     |
| 1766         | 104.055           | 31.353   | 0.0        | 104.027            | 31.326   | 0.0        | 104.010            | 31.343   | 1.6        | 104.038           | 31.370   | 1.6        | 0.74          | 3.68    | 3.75     |
| 1767         | 104.027           | 31.326   | 0.0        | 103.999            | 31.300   | 0.0        | 103.981            | 31.317   | 1.6        | 104.010           | 31.343   | 1.6        | 0.16          | 3.04    | 3.04     |
| 1768         | 103.999           | 31.300   | 0.0        | 103.971            | 31.273   | 0.0        | 103.954            | 31.290   | 1.6        | 103.981           | 31.317   | 1.6        | 0.00          | 2.74    | 2.74     |
| 1769         | 103.971           | 31.273   | 0.0        | 103.943            | 31.247   | 0.0        | 103.925            | 31.263   | 1.6        | 103.954           | 31.290   | 1.6        | 0.00          | 2.56    | 2.56     |
| 1770         | 103.943           | 31.247   | 0.0        | 103.915            | 31.220   | 0.0        | 103.897            | 31.237   | 1.6        | 103.925           | 31.263   | 1.6        | 0.00          | 2.42    | 2.42     |
| 1771         | 103.915           | 31.220   | 0.0        | 103.887            | 31.193   | 0.0        | 103.869            | 31.210   | 1.6        | 103.897           | 31.237   | 1.6        | 0.00          | 2.06    | 2.06     |
| 1772         | 103.887           | 31.193   | 0.0        | 103.859            | 31.166   | 0.0        | 103.841            | 31.183   | 1.6        | 103.869           | 31.210   | 1.6        | 0.00          | 1.15    | 1.15     |
| 1773         | 103.859           | 31.166   | 0.0        | 103.831            | 31.140   | 0.0        | 103.813            | 31.157   | 1.6        | 103.841           | 31.183   | 1.6        | 0.00          | 0.12    | 0.12     |
| 1774         | 103.831           | 31.140   | 0.0        | 103.803            | 31.113   | 0.0        | 103.785            | 31.130   | 1.6        | 103.813           | 31.157   | 1.6        | 0.00          | 0.13    | 0.13     |
| 1775         | 103.803           | 31.113   | 0.0        | 103.775            | 31.087   | 0.0        | 103.757            | 31.103   | 1.6        | 103.785           | 31.130   | 1.6        | 0.00          | 0.63    | 0.63     |
| 1776         | 103.775           | 31.087   | 0.0        | 103.747            | 31.060   | 0.0        | 103.729            | 31.076   | 1.6        | 103.757           | 31.103   | 1.6        | 0.00          | 0.80    | 0.80     |
| 1777         | 103.747           | 31.060   | 0.0        | 103.719            | 31.033   | 0.0        | 103.701            | 31.050   | 1.6        | 103.729           | 31.076   | 1.6        | 0.00          | 0.29    | 0.29     |
| 1778         | 103.719           | 31.033   | 0.0        | 103.691            | 31.006   | 0.0        | 103.673            | 31.023   | 1.6        | 103.701           | 31.050   | 1.6        | 0.00          | 0.22    | 0.22     |
| 1779         | 103.691           | 31.006   | 0.0        | 103.663            | 30.980   | 0.0        | 103.645            | 30.997   | 1.6        | 103.673           | 31.023   | 1.6        | 0.00          | 0.00    | 0.00     |
| 1780         | 103.663           | 30.980   | 0.0        | 103.635            | 30.953   | 0.0        | 103.617            | 30.970   | 1.6        | 103.645           | 30.997   | 1.6        | 0.00          | 0.29    | 0.29     |
| 1781         | 103.635           | 30.953   | 0.0        | 103.607            | 30.927   | 0.0        | 103.589            | 30.943   | 1.6        | 103.617           | 30.970   | 1.6        | 0.00          | 1.06    | 1.06     |
| 1782         | 103.607           | 30.927   | 0.0        | 103.579            | 30.900   | 0.0        | 103.561            | 30.916   | 1.6        | 103.589           | 30.943   | 1.6        | 0.00          | 0.90    | 0.90     |
| 1783         | 103.579           | 30.900   | 0.0        | 103.551            | 30.873   | 0.0        | 103.533            | 30.890   | 1.6        | 103.561           | 30.916   | 1.6        | 0.12          | 0.00    | 0.12     |
| 1784         | 103.551           | 30.873   | 0.0        | 103.523            | 30.846   | 0.0        | 103.505            | 30.863   | 1.6        | 103.533           | 30.890   | 1.6        | 0.31          | 0.30    | 0.43     |

|      |         |        |     |         |        |     |         |        |     |         |        |     |      |      |      |
|------|---------|--------|-----|---------|--------|-----|---------|--------|-----|---------|--------|-----|------|------|------|
| 1785 | 103.523 | 30.846 | 0.0 | 103.495 | 30.820 | 0.0 | 103.477 | 30.837 | 1.6 | 103.505 | 30.863 | 1.6 | 0.18 | 0.21 | 0.28 |
| 1786 | 103.495 | 30.820 | 0.0 | 103.467 | 30.793 | 0.0 | 103.449 | 30.810 | 1.6 | 103.477 | 30.837 | 1.6 | 0.05 | 0.00 | 0.05 |
| 1787 | 103.467 | 30.793 | 0.0 | 103.439 | 30.767 | 0.0 | 103.421 | 30.783 | 1.6 | 103.449 | 30.810 | 1.6 | 0.00 | 0.00 | 0.00 |
| 1788 | 103.439 | 30.767 | 0.0 | 103.411 | 30.740 | 0.0 | 103.393 | 30.756 | 1.6 | 103.421 | 30.783 | 1.6 | 0.01 | 0.00 | 0.01 |
| 1789 | 103.411 | 30.740 | 0.0 | 103.383 | 30.713 | 0.0 | 103.365 | 30.730 | 1.6 | 103.393 | 30.756 | 1.6 | 0.00 | 0.06 | 0.06 |
| 1790 | 103.383 | 30.713 | 0.0 | 103.355 | 30.686 | 0.0 | 103.337 | 30.703 | 1.6 | 103.365 | 30.730 | 1.6 | 0.00 | 0.08 | 0.08 |
| 1791 | 103.355 | 30.686 | 0.0 | 103.326 | 30.660 | 0.0 | 103.309 | 30.677 | 1.6 | 103.337 | 30.703 | 1.6 | 0.00 | 0.00 | 0.00 |
| 1792 | 104.568 | 31.875 | 1.6 | 104.540 | 31.848 | 1.6 | 104.523 | 31.865 | 3.3 | 104.551 | 31.892 | 3.3 | 0.00 | 0.00 | 0.00 |
| 1793 | 104.540 | 31.848 | 1.6 | 104.512 | 31.822 | 1.6 | 104.495 | 31.839 | 3.3 | 104.523 | 31.865 | 3.3 | 0.00 | 0.17 | 0.17 |
| 1794 | 104.512 | 31.822 | 1.6 | 104.484 | 31.795 | 1.6 | 104.466 | 31.812 | 3.3 | 104.495 | 31.839 | 3.3 | 0.34 | 0.00 | 0.34 |
| 1795 | 104.484 | 31.795 | 1.6 | 104.456 | 31.768 | 1.6 | 104.439 | 31.785 | 3.3 | 104.466 | 31.812 | 3.3 | 0.00 | 0.00 | 0.00 |
| 1796 | 104.456 | 31.768 | 1.6 | 104.428 | 31.742 | 1.6 | 104.410 | 31.759 | 3.3 | 104.439 | 31.785 | 3.3 | 0.00 | 0.00 | 0.00 |
| 1797 | 104.428 | 31.742 | 1.6 | 104.400 | 31.715 | 1.6 | 104.382 | 31.732 | 3.3 | 104.410 | 31.759 | 3.3 | 0.00 | 0.41 | 0.41 |
| 1798 | 104.400 | 31.715 | 1.6 | 104.372 | 31.688 | 1.6 | 104.354 | 31.705 | 3.3 | 104.382 | 31.732 | 3.3 | 0.00 | 2.32 | 2.32 |
| 1799 | 104.372 | 31.688 | 1.6 | 104.344 | 31.662 | 1.6 | 104.326 | 31.678 | 3.3 | 104.354 | 31.705 | 3.3 | 0.00 | 2.85 | 2.85 |
| 1800 | 104.344 | 31.662 | 1.6 | 104.316 | 31.635 | 1.6 | 104.298 | 31.652 | 3.3 | 104.326 | 31.678 | 3.3 | 0.00 | 1.88 | 1.88 |
| 1801 | 104.316 | 31.635 | 1.6 | 104.288 | 31.608 | 1.6 | 104.270 | 31.625 | 3.3 | 104.298 | 31.652 | 3.3 | 0.00 | 0.86 | 0.86 |
| 1802 | 104.288 | 31.608 | 1.6 | 104.260 | 31.582 | 1.6 | 104.242 | 31.599 | 3.3 | 104.270 | 31.625 | 3.3 | 0.00 | 0.45 | 0.45 |
| 1803 | 104.260 | 31.582 | 1.6 | 104.232 | 31.555 | 1.6 | 104.214 | 31.572 | 3.3 | 104.242 | 31.599 | 3.3 | 0.11 | 0.41 | 0.42 |
| 1804 | 104.232 | 31.555 | 1.6 | 104.204 | 31.528 | 1.6 | 104.186 | 31.545 | 3.3 | 104.214 | 31.572 | 3.3 | 0.04 | 0.00 | 0.04 |
| 1805 | 104.204 | 31.528 | 1.6 | 104.176 | 31.502 | 1.6 | 104.158 | 31.518 | 3.3 | 104.186 | 31.545 | 3.3 | 0.00 | 0.00 | 0.00 |
| 1806 | 104.176 | 31.502 | 1.6 | 104.148 | 31.475 | 1.6 | 104.130 | 31.492 | 3.3 | 104.158 | 31.518 | 3.3 | 0.00 | 0.25 | 0.25 |
| 1807 | 104.148 | 31.475 | 1.6 | 104.120 | 31.448 | 1.6 | 104.102 | 31.465 | 3.3 | 104.130 | 31.492 | 3.3 | 0.31 | 0.94 | 0.99 |
| 1808 | 104.120 | 31.448 | 1.6 | 104.092 | 31.422 | 1.6 | 104.074 | 31.439 | 3.3 | 104.102 | 31.465 | 3.3 | 1.55 | 2.10 | 2.61 |
| 1809 | 104.092 | 31.422 | 1.6 | 104.064 | 31.395 | 1.6 | 104.046 | 31.412 | 3.3 | 104.074 | 31.439 | 3.3 | 2.03 | 3.31 | 3.88 |
| 1810 | 104.064 | 31.395 | 1.6 | 104.036 | 31.368 | 1.6 | 104.018 | 31.385 | 3.3 | 104.046 | 31.412 | 3.3 | 1.09 | 4.05 | 4.19 |
| 1811 | 104.036 | 31.368 | 1.6 | 104.008 | 31.342 | 1.6 | 103.990 | 31.358 | 3.3 | 104.018 | 31.385 | 3.3 | 0.75 | 3.32 | 3.41 |
| 1812 | 104.008 | 31.342 | 1.6 | 103.980 | 31.315 | 1.6 | 103.962 | 31.332 | 3.3 | 103.990 | 31.358 | 3.3 | 0.13 | 2.26 | 2.26 |
| 1813 | 103.980 | 31.315 | 1.6 | 103.952 | 31.288 | 1.6 | 103.934 | 31.305 | 3.3 | 103.962 | 31.332 | 3.3 | 0.00 | 1.75 | 1.75 |
| 1814 | 103.952 | 31.288 | 1.6 | 103.924 | 31.262 | 1.6 | 103.906 | 31.278 | 3.3 | 103.934 | 31.305 | 3.3 | 0.00 | 1.61 | 1.61 |
| 1815 | 103.924 | 31.262 | 1.6 | 103.896 | 31.235 | 1.6 | 103.878 | 31.252 | 3.3 | 103.906 | 31.278 | 3.3 | 0.00 | 1.58 | 1.58 |
| 1816 | 103.896 | 31.235 | 1.6 | 103.868 | 31.208 | 1.6 | 103.850 | 31.225 | 3.3 | 103.878 | 31.252 | 3.3 | 0.00 | 1.46 | 1.46 |
| 1817 | 103.868 | 31.208 | 1.6 | 103.840 | 31.182 | 1.6 | 103.822 | 31.198 | 3.3 | 103.850 | 31.225 | 3.3 | 0.00 | 1.09 | 1.09 |
| 1818 | 103.840 | 31.182 | 1.6 | 103.811 | 31.155 | 1.6 | 103.794 | 31.172 | 3.3 | 103.822 | 31.198 | 3.3 | 0.00 | 0.24 | 0.24 |
| 1819 | 103.811 | 31.155 | 1.6 | 103.784 | 31.128 | 1.6 | 103.766 | 31.145 | 3.3 | 103.794 | 31.172 | 3.3 | 0.00 | 0.19 | 0.19 |
| 1820 | 103.784 | 31.128 | 1.6 | 103.755 | 31.102 | 1.6 | 103.738 | 31.118 | 3.3 | 103.766 | 31.145 | 3.3 | 0.00 | 0.88 | 0.88 |
| 1821 | 103.755 | 31.102 | 1.6 | 103.727 | 31.075 | 1.6 | 103.710 | 31.092 | 3.3 | 103.738 | 31.118 | 3.3 | 0.00 | 1.28 | 1.28 |
| 1822 | 103.727 | 31.075 | 1.6 | 103.699 | 31.048 | 1.6 | 103.682 | 31.065 | 3.3 | 103.710 | 31.092 | 3.3 | 0.00 | 0.74 | 0.74 |
| 1823 | 103.699 | 31.048 | 1.6 | 103.671 | 31.022 | 1.6 | 103.653 | 31.038 | 3.3 | 103.682 | 31.065 | 3.3 | 0.00 | 0.77 | 0.77 |
| 1824 | 103.671 | 31.022 | 1.6 | 103.643 | 30.995 | 1.6 | 103.626 | 31.012 | 3.3 | 103.653 | 31.038 | 3.3 | 0.00 | 0.18 | 0.18 |
| 1825 | 103.643 | 30.995 | 1.6 | 103.615 | 30.968 | 1.6 | 103.597 | 30.985 | 3.3 | 103.626 | 31.012 | 3.3 | 0.00 | 0.06 | 0.06 |
| 1826 | 103.615 | 30.968 | 1.6 | 103.587 | 30.942 | 1.6 | 103.569 | 30.958 | 3.3 | 103.597 | 30.985 | 3.3 | 0.00 | 0.96 | 0.96 |
| 1827 | 103.587 | 30.942 | 1.6 | 103.559 | 30.915 | 1.6 | 103.541 | 30.932 | 3.3 | 103.569 | 30.958 | 3.3 | 0.00 | 1.09 | 1.09 |
| 1828 | 103.559 | 30.915 | 1.6 | 103.531 | 30.888 | 1.6 | 103.513 | 30.905 | 3.3 | 103.541 | 30.932 | 3.3 | 0.08 | 0.11 | 0.14 |
| 1829 | 103.531 | 30.888 | 1.6 | 103.503 | 30.862 | 1.6 | 103.485 | 30.878 | 3.3 | 103.513 | 30.905 | 3.3 | 0.00 | 0.01 | 0.01 |

|      |         |        |     |         |        |     |         |        |     |         |        |     |      |      |      |
|------|---------|--------|-----|---------|--------|-----|---------|--------|-----|---------|--------|-----|------|------|------|
| 1830 | 103.503 | 30.862 | 1.6 | 103.475 | 30.835 | 1.6 | 103.457 | 30.852 | 3.3 | 103.485 | 30.878 | 3.3 | 0.00 | 0.03 | 0.03 |
| 1831 | 103.475 | 30.835 | 1.6 | 103.447 | 30.808 | 1.6 | 103.429 | 30.825 | 3.3 | 103.457 | 30.852 | 3.3 | 0.00 | 0.00 | 0.00 |
| 1832 | 103.447 | 30.808 | 1.6 | 103.419 | 30.782 | 1.6 | 103.401 | 30.798 | 3.3 | 103.429 | 30.825 | 3.3 | 0.00 | 0.11 | 0.11 |
| 1833 | 103.419 | 30.782 | 1.6 | 103.391 | 30.755 | 1.6 | 103.373 | 30.772 | 3.3 | 103.401 | 30.798 | 3.3 | 0.03 | 0.00 | 0.03 |
| 1834 | 103.391 | 30.755 | 1.6 | 103.363 | 30.728 | 1.6 | 103.345 | 30.745 | 3.3 | 103.373 | 30.772 | 3.3 | 0.08 | 0.00 | 0.08 |
| 1835 | 103.363 | 30.728 | 1.6 | 103.335 | 30.702 | 1.6 | 103.317 | 30.718 | 3.3 | 103.345 | 30.745 | 3.3 | 0.03 | 0.00 | 0.03 |
| 1836 | 103.335 | 30.702 | 1.6 | 103.307 | 30.675 | 1.6 | 103.289 | 30.692 | 3.3 | 103.317 | 30.718 | 3.3 | 0.00 | 0.00 | 0.00 |
| 1837 | 104.549 | 31.890 | 3.3 | 104.521 | 31.864 | 3.3 | 104.503 | 31.881 | 4.9 | 104.531 | 31.907 | 4.9 | 0.00 | 0.00 | 0.00 |
| 1838 | 104.521 | 31.864 | 3.3 | 104.493 | 31.837 | 3.3 | 104.475 | 31.854 | 4.9 | 104.503 | 31.881 | 4.9 | 0.00 | 0.04 | 0.04 |
| 1839 | 104.493 | 31.837 | 3.3 | 104.465 | 31.810 | 3.3 | 104.447 | 31.827 | 4.9 | 104.475 | 31.854 | 4.9 | 0.37 | 0.00 | 0.37 |
| 1840 | 104.465 | 31.810 | 3.3 | 104.437 | 31.784 | 3.3 | 104.419 | 31.800 | 4.9 | 104.447 | 31.827 | 4.9 | 0.00 | 0.00 | 0.00 |
| 1841 | 104.437 | 31.784 | 3.3 | 104.409 | 31.757 | 3.3 | 104.391 | 31.774 | 4.9 | 104.419 | 31.800 | 4.9 | 0.00 | 0.00 | 0.00 |
| 1842 | 104.409 | 31.757 | 3.3 | 104.380 | 31.730 | 3.3 | 104.363 | 31.747 | 4.9 | 104.391 | 31.774 | 4.9 | 0.00 | 0.07 | 0.07 |
| 1843 | 104.380 | 31.730 | 3.3 | 104.353 | 31.704 | 3.3 | 104.335 | 31.720 | 4.9 | 104.363 | 31.747 | 4.9 | 0.00 | 1.05 | 1.05 |
| 1844 | 104.353 | 31.704 | 3.3 | 104.325 | 31.677 | 3.3 | 104.307 | 31.694 | 4.9 | 104.335 | 31.720 | 4.9 | 0.00 | 1.34 | 1.34 |
| 1845 | 104.325 | 31.677 | 3.3 | 104.296 | 31.650 | 3.3 | 104.279 | 31.667 | 4.9 | 104.307 | 31.694 | 4.9 | 0.00 | 0.83 | 0.83 |
| 1846 | 104.296 | 31.650 | 3.3 | 104.268 | 31.624 | 3.3 | 104.251 | 31.640 | 4.9 | 104.279 | 31.667 | 4.9 | 0.00 | 0.25 | 0.25 |
| 1847 | 104.268 | 31.624 | 3.3 | 104.240 | 31.597 | 3.3 | 104.223 | 31.614 | 4.9 | 104.251 | 31.640 | 4.9 | 0.00 | 0.00 | 0.00 |
| 1848 | 104.240 | 31.597 | 3.3 | 104.212 | 31.570 | 3.3 | 104.195 | 31.587 | 4.9 | 104.223 | 31.614 | 4.9 | 0.08 | 0.00 | 0.08 |
| 1849 | 104.212 | 31.570 | 3.3 | 104.184 | 31.544 | 3.3 | 104.166 | 31.560 | 4.9 | 104.195 | 31.587 | 4.9 | 0.00 | 0.00 | 0.00 |
| 1850 | 104.184 | 31.544 | 3.3 | 104.156 | 31.517 | 3.3 | 104.138 | 31.534 | 4.9 | 104.166 | 31.560 | 4.9 | 0.00 | 0.00 | 0.00 |
| 1851 | 104.156 | 31.517 | 3.3 | 104.128 | 31.490 | 3.3 | 104.111 | 31.507 | 4.9 | 104.138 | 31.534 | 4.9 | 0.04 | 0.00 | 0.04 |
| 1852 | 104.128 | 31.490 | 3.3 | 104.100 | 31.464 | 3.3 | 104.082 | 31.480 | 4.9 | 104.111 | 31.507 | 4.9 | 0.47 | 0.23 | 0.52 |
| 1853 | 104.100 | 31.464 | 3.3 | 104.072 | 31.437 | 3.3 | 104.054 | 31.454 | 4.9 | 104.082 | 31.480 | 4.9 | 1.26 | 0.89 | 1.54 |
| 1854 | 104.072 | 31.437 | 3.3 | 104.044 | 31.410 | 3.3 | 104.026 | 31.427 | 4.9 | 104.054 | 31.454 | 4.9 | 1.67 | 1.64 | 2.34 |
| 1855 | 104.044 | 31.410 | 3.3 | 104.016 | 31.384 | 3.3 | 103.998 | 31.400 | 4.9 | 104.026 | 31.427 | 4.9 | 1.11 | 2.02 | 2.30 |
| 1856 | 104.016 | 31.384 | 3.3 | 103.988 | 31.357 | 3.3 | 103.970 | 31.374 | 4.9 | 103.998 | 31.400 | 4.9 | 0.59 | 1.52 | 1.63 |
| 1857 | 103.988 | 31.357 | 3.3 | 103.960 | 31.330 | 3.3 | 103.942 | 31.347 | 4.9 | 103.970 | 31.374 | 4.9 | 0.07 | 0.84 | 0.84 |
| 1858 | 103.960 | 31.330 | 3.3 | 103.932 | 31.303 | 3.3 | 103.914 | 31.320 | 4.9 | 103.942 | 31.347 | 4.9 | 0.00 | 0.52 | 0.52 |
| 1859 | 103.932 | 31.303 | 3.3 | 103.904 | 31.277 | 3.3 | 103.886 | 31.294 | 4.9 | 103.914 | 31.320 | 4.9 | 0.00 | 0.54 | 0.54 |
| 1860 | 103.904 | 31.277 | 3.3 | 103.876 | 31.250 | 3.3 | 103.858 | 31.267 | 4.9 | 103.886 | 31.294 | 4.9 | 0.00 | 0.83 | 0.83 |
| 1861 | 103.876 | 31.250 | 3.3 | 103.848 | 31.224 | 3.3 | 103.830 | 31.240 | 4.9 | 103.858 | 31.267 | 4.9 | 0.00 | 1.16 | 1.16 |
| 1862 | 103.848 | 31.224 | 3.3 | 103.820 | 31.197 | 3.3 | 103.802 | 31.213 | 4.9 | 103.830 | 31.240 | 4.9 | 0.00 | 1.19 | 1.19 |
| 1863 | 103.820 | 31.197 | 3.3 | 103.792 | 31.170 | 3.3 | 103.774 | 31.187 | 4.9 | 103.802 | 31.213 | 4.9 | 0.00 | 0.43 | 0.43 |
| 1864 | 103.792 | 31.170 | 3.3 | 103.764 | 31.143 | 3.3 | 103.746 | 31.160 | 4.9 | 103.774 | 31.187 | 4.9 | 0.00 | 0.00 | 0.00 |
| 1865 | 103.764 | 31.143 | 3.3 | 103.736 | 31.117 | 3.3 | 103.718 | 31.134 | 4.9 | 103.746 | 31.160 | 4.9 | 0.35 | 0.72 | 0.81 |
| 1866 | 103.736 | 31.117 | 3.3 | 103.708 | 31.090 | 3.3 | 103.690 | 31.107 | 4.9 | 103.718 | 31.134 | 4.9 | 0.32 | 1.30 | 1.34 |
| 1867 | 103.708 | 31.090 | 3.3 | 103.680 | 31.063 | 3.3 | 103.662 | 31.080 | 4.9 | 103.690 | 31.107 | 4.9 | 0.00 | 0.95 | 0.95 |
| 1868 | 103.680 | 31.063 | 3.3 | 103.652 | 31.037 | 3.3 | 103.634 | 31.053 | 4.9 | 103.662 | 31.080 | 4.9 | 0.00 | 1.04 | 1.04 |
| 1869 | 103.652 | 31.037 | 3.3 | 103.624 | 31.010 | 3.3 | 103.606 | 31.027 | 4.9 | 103.634 | 31.053 | 4.9 | 0.00 | 0.30 | 0.30 |
| 1870 | 103.624 | 31.010 | 3.3 | 103.596 | 30.983 | 3.3 | 103.578 | 31.000 | 4.9 | 103.606 | 31.027 | 4.9 | 0.00 | 0.05 | 0.05 |
| 1871 | 103.596 | 30.983 | 3.3 | 103.568 | 30.957 | 3.3 | 103.550 | 30.973 | 4.9 | 103.578 | 31.000 | 4.9 | 0.00 | 1.07 | 1.07 |
| 1872 | 103.568 | 30.957 | 3.3 | 103.540 | 30.930 | 3.3 | 103.522 | 30.947 | 4.9 | 103.550 | 30.973 | 4.9 | 0.00 | 1.63 | 1.63 |
| 1873 | 103.540 | 30.930 | 3.3 | 103.512 | 30.903 | 3.3 | 103.494 | 30.920 | 4.9 | 103.522 | 30.947 | 4.9 | 0.00 | 0.91 | 0.91 |
| 1874 | 103.512 | 30.903 | 3.3 | 103.484 | 30.877 | 3.3 | 103.466 | 30.893 | 4.9 | 103.494 | 30.920 | 4.9 | 0.00 | 0.30 | 0.30 |



|      |         |        |     |         |        |     |         |        |     |         |        |     |      |      |      |
|------|---------|--------|-----|---------|--------|-----|---------|--------|-----|---------|--------|-----|------|------|------|
| 1875 | 103.484 | 30.877 | 3.3 | 103.456 | 30.850 | 3.3 | 103.438 | 30.867 | 4.9 | 103.466 | 30.893 | 4.9 | 0.00 | 0.03 | 0.03 |
| 1876 | 103.456 | 30.850 | 3.3 | 103.427 | 30.823 | 3.3 | 103.410 | 30.840 | 4.9 | 103.438 | 30.867 | 4.9 | 0.00 | 0.00 | 0.00 |
| 1877 | 103.427 | 30.823 | 3.3 | 103.399 | 30.797 | 3.3 | 103.382 | 30.813 | 4.9 | 103.410 | 30.840 | 4.9 | 0.02 | 0.00 | 0.02 |
| 1878 | 103.399 | 30.797 | 3.3 | 103.371 | 30.770 | 3.3 | 103.354 | 30.787 | 4.9 | 103.382 | 30.813 | 4.9 | 0.03 | 0.00 | 0.03 |
| 1879 | 103.371 | 30.770 | 3.3 | 103.343 | 30.743 | 3.3 | 103.326 | 30.760 | 4.9 | 103.354 | 30.787 | 4.9 | 0.06 | 0.00 | 0.06 |
| 1880 | 103.343 | 30.743 | 3.3 | 103.315 | 30.717 | 3.3 | 103.298 | 30.733 | 4.9 | 103.326 | 30.760 | 4.9 | 0.00 | 0.00 | 0.00 |
| 1881 | 103.315 | 30.717 | 3.3 | 103.287 | 30.690 | 3.3 | 103.269 | 30.707 | 4.9 | 103.298 | 30.733 | 4.9 | 0.00 | 0.00 | 0.00 |
| 1882 | 104.529 | 31.906 | 4.9 | 104.501 | 31.879 | 4.9 | 104.483 | 31.896 | 6.5 | 104.511 | 31.922 | 6.5 | 0.00 | 0.00 | 0.00 |
| 1883 | 104.501 | 31.879 | 4.9 | 104.473 | 31.852 | 4.9 | 104.455 | 31.869 | 6.5 | 104.483 | 31.896 | 6.5 | 0.00 | 0.00 | 0.00 |
| 1884 | 104.473 | 31.852 | 4.9 | 104.445 | 31.826 | 4.9 | 104.427 | 31.842 | 6.5 | 104.455 | 31.869 | 6.5 | 0.00 | 0.00 | 0.00 |
| 1885 | 104.445 | 31.826 | 4.9 | 104.417 | 31.799 | 4.9 | 104.399 | 31.816 | 6.5 | 104.427 | 31.842 | 6.5 | 0.00 | 0.00 | 0.00 |
| 1886 | 104.417 | 31.799 | 4.9 | 104.389 | 31.772 | 4.9 | 104.371 | 31.789 | 6.5 | 104.399 | 31.816 | 6.5 | 0.00 | 0.00 | 0.00 |
| 1887 | 104.389 | 31.772 | 4.9 | 104.361 | 31.746 | 4.9 | 104.343 | 31.762 | 6.5 | 104.371 | 31.789 | 6.5 | 0.00 | 0.00 | 0.00 |
| 1888 | 104.361 | 31.746 | 4.9 | 104.333 | 31.719 | 4.9 | 104.315 | 31.736 | 6.5 | 104.343 | 31.762 | 6.5 | 0.00 | 0.00 | 0.00 |
| 1889 | 104.333 | 31.719 | 4.9 | 104.305 | 31.692 | 4.9 | 104.287 | 31.709 | 6.5 | 104.315 | 31.736 | 6.5 | 0.00 | 0.00 | 0.00 |
| 1890 | 104.305 | 31.692 | 4.9 | 104.277 | 31.666 | 4.9 | 104.259 | 31.682 | 6.5 | 104.287 | 31.709 | 6.5 | 0.00 | 0.00 | 0.00 |
| 1891 | 104.277 | 31.666 | 4.9 | 104.249 | 31.639 | 4.9 | 104.231 | 31.656 | 6.5 | 104.259 | 31.682 | 6.5 | 0.00 | 0.00 | 0.00 |
| 1892 | 104.249 | 31.639 | 4.9 | 104.221 | 31.612 | 4.9 | 104.203 | 31.629 | 6.5 | 104.231 | 31.656 | 6.5 | 0.00 | 0.00 | 0.00 |
| 1893 | 104.221 | 31.612 | 4.9 | 104.193 | 31.585 | 4.9 | 104.175 | 31.602 | 6.5 | 104.203 | 31.629 | 6.5 | 0.00 | 0.00 | 0.00 |
| 1894 | 104.193 | 31.585 | 4.9 | 104.165 | 31.559 | 4.9 | 104.147 | 31.576 | 6.5 | 104.175 | 31.602 | 6.5 | 0.00 | 0.00 | 0.00 |
| 1895 | 104.165 | 31.559 | 4.9 | 104.137 | 31.532 | 4.9 | 104.119 | 31.549 | 6.5 | 104.147 | 31.576 | 6.5 | 0.00 | 0.00 | 0.00 |
| 1896 | 104.137 | 31.532 | 4.9 | 104.109 | 31.505 | 4.9 | 104.091 | 31.522 | 6.5 | 104.119 | 31.549 | 6.5 | 0.04 | 0.00 | 0.04 |
| 1897 | 104.109 | 31.505 | 4.9 | 104.081 | 31.479 | 4.9 | 104.063 | 31.495 | 6.5 | 104.091 | 31.522 | 6.5 | 0.31 | 0.00 | 0.31 |
| 1898 | 104.081 | 31.479 | 4.9 | 104.053 | 31.452 | 4.9 | 104.035 | 31.469 | 6.5 | 104.063 | 31.495 | 6.5 | 0.69 | 0.00 | 0.69 |
| 1899 | 104.053 | 31.452 | 4.9 | 104.025 | 31.425 | 4.9 | 104.007 | 31.442 | 6.5 | 104.035 | 31.469 | 6.5 | 0.92 | 0.10 | 0.92 |
| 1900 | 104.025 | 31.425 | 4.9 | 103.996 | 31.399 | 4.9 | 103.979 | 31.416 | 6.5 | 104.007 | 31.442 | 6.5 | 0.66 | 0.17 | 0.69 |
| 1901 | 103.996 | 31.399 | 4.9 | 103.969 | 31.372 | 4.9 | 103.951 | 31.389 | 6.5 | 103.979 | 31.416 | 6.5 | 0.29 | 0.02 | 0.29 |
| 1902 | 103.969 | 31.372 | 4.9 | 103.940 | 31.345 | 4.9 | 103.923 | 31.362 | 6.5 | 103.951 | 31.389 | 6.5 | 0.00 | 0.00 | 0.00 |
| 1903 | 103.940 | 31.345 | 4.9 | 103.912 | 31.319 | 4.9 | 103.895 | 31.335 | 6.5 | 103.923 | 31.362 | 6.5 | 0.00 | 0.32 | 0.32 |
| 1904 | 103.912 | 31.319 | 4.9 | 103.884 | 31.292 | 4.9 | 103.867 | 31.309 | 6.5 | 103.895 | 31.335 | 6.5 | 0.00 | 0.54 | 0.54 |
| 1905 | 103.884 | 31.292 | 4.9 | 103.856 | 31.265 | 4.9 | 103.839 | 31.282 | 6.5 | 103.867 | 31.309 | 6.5 | 0.00 | 0.96 | 0.96 |
| 1906 | 103.856 | 31.265 | 4.9 | 103.828 | 31.239 | 4.9 | 103.811 | 31.255 | 6.5 | 103.839 | 31.282 | 6.5 | 0.00 | 1.40 | 1.40 |
| 1907 | 103.828 | 31.239 | 4.9 | 103.800 | 31.212 | 4.9 | 103.782 | 31.229 | 6.5 | 103.811 | 31.255 | 6.5 | 0.00 | 1.42 | 1.42 |
| 1908 | 103.800 | 31.212 | 4.9 | 103.772 | 31.185 | 4.9 | 103.754 | 31.202 | 6.5 | 103.782 | 31.229 | 6.5 | 0.42 | 0.71 | 0.83 |
| 1909 | 103.772 | 31.185 | 4.9 | 103.744 | 31.159 | 4.9 | 103.726 | 31.175 | 6.5 | 103.754 | 31.202 | 6.5 | 0.90 | 0.23 | 0.93 |
| 1910 | 103.744 | 31.159 | 4.9 | 103.716 | 31.132 | 4.9 | 103.698 | 31.149 | 6.5 | 103.726 | 31.175 | 6.5 | 1.26 | 0.70 | 1.44 |
| 1911 | 103.716 | 31.132 | 4.9 | 103.688 | 31.105 | 4.9 | 103.670 | 31.122 | 6.5 | 103.698 | 31.149 | 6.5 | 0.75 | 1.12 | 1.35 |
| 1912 | 103.688 | 31.105 | 4.9 | 103.660 | 31.079 | 4.9 | 103.642 | 31.095 | 6.5 | 103.670 | 31.122 | 6.5 | 0.00 | 0.92 | 0.92 |
| 1913 | 103.660 | 31.079 | 4.9 | 103.632 | 31.052 | 4.9 | 103.614 | 31.069 | 6.5 | 103.642 | 31.095 | 6.5 | 0.00 | 1.08 | 1.08 |
| 1914 | 103.632 | 31.052 | 4.9 | 103.604 | 31.025 | 4.9 | 103.586 | 31.042 | 6.5 | 103.614 | 31.069 | 6.5 | 0.00 | 0.90 | 0.90 |
| 1915 | 103.604 | 31.025 | 4.9 | 103.576 | 30.998 | 4.9 | 103.558 | 31.015 | 6.5 | 103.586 | 31.042 | 6.5 | 0.01 | 0.85 | 0.85 |
| 1916 | 103.576 | 30.998 | 4.9 | 103.548 | 30.972 | 4.9 | 103.530 | 30.988 | 6.5 | 103.558 | 31.015 | 6.5 | 0.00 | 1.53 | 1.53 |
| 1917 | 103.548 | 30.972 | 4.9 | 103.520 | 30.945 | 4.9 | 103.502 | 30.962 | 6.5 | 103.530 | 30.988 | 6.5 | 0.00 | 2.00 | 2.00 |
| 1918 | 103.520 | 30.945 | 4.9 | 103.492 | 30.919 | 4.9 | 103.474 | 30.935 | 6.5 | 103.502 | 30.962 | 6.5 | 0.00 | 1.56 | 1.56 |
| 1919 | 103.492 | 30.919 | 4.9 | 103.464 | 30.892 | 4.9 | 103.446 | 30.909 | 6.5 | 103.474 | 30.935 | 6.5 | 0.00 | 0.90 | 0.90 |

|      |         |        |     |         |        |     |         |        |     |         |        |     |      |      |      |
|------|---------|--------|-----|---------|--------|-----|---------|--------|-----|---------|--------|-----|------|------|------|
| 1920 | 103.464 | 30.892 | 4.9 | 103.436 | 30.865 | 4.9 | 103.418 | 30.882 | 6.5 | 103.446 | 30.909 | 6.5 | 0.00 | 0.46 | 0.46 |
| 1921 | 103.436 | 30.865 | 4.9 | 103.408 | 30.838 | 4.9 | 103.390 | 30.855 | 6.5 | 103.418 | 30.882 | 6.5 | 0.00 | 0.29 | 0.29 |
| 1922 | 103.408 | 30.838 | 4.9 | 103.380 | 30.812 | 4.9 | 103.362 | 30.828 | 6.5 | 103.390 | 30.855 | 6.5 | 0.00 | 0.26 | 0.26 |
| 1923 | 103.380 | 30.812 | 4.9 | 103.352 | 30.785 | 4.9 | 103.334 | 30.802 | 6.5 | 103.362 | 30.828 | 6.5 | 0.00 | 0.40 | 0.40 |
| 1924 | 103.352 | 30.785 | 4.9 | 103.324 | 30.758 | 4.9 | 103.306 | 30.775 | 6.5 | 103.334 | 30.802 | 6.5 | 0.00 | 0.67 | 0.67 |
| 1925 | 103.324 | 30.758 | 4.9 | 103.296 | 30.732 | 4.9 | 103.278 | 30.748 | 6.5 | 103.306 | 30.775 | 6.5 | 0.00 | 0.79 | 0.79 |
| 1926 | 103.296 | 30.732 | 4.9 | 103.268 | 30.705 | 4.9 | 103.250 | 30.722 | 6.5 | 103.278 | 30.748 | 6.5 | 0.00 | 0.02 | 0.02 |
| 1927 | 104.509 | 31.921 | 6.5 | 104.481 | 31.894 | 6.5 | 104.464 | 31.911 | 8.2 | 104.492 | 31.938 | 8.2 | 0.00 | 0.00 | 0.00 |
| 1928 | 104.481 | 31.894 | 6.5 | 104.453 | 31.867 | 6.5 | 104.436 | 31.884 | 8.2 | 104.464 | 31.911 | 8.2 | 0.00 | 0.00 | 0.00 |
| 1929 | 104.453 | 31.867 | 6.5 | 104.425 | 31.841 | 6.5 | 104.408 | 31.858 | 8.2 | 104.436 | 31.884 | 8.2 | 0.00 | 0.00 | 0.00 |
| 1930 | 104.425 | 31.841 | 6.5 | 104.397 | 31.814 | 6.5 | 104.379 | 31.831 | 8.2 | 104.408 | 31.858 | 8.2 | 0.00 | 0.00 | 0.00 |
| 1931 | 104.397 | 31.814 | 6.5 | 104.369 | 31.788 | 6.5 | 104.352 | 31.804 | 8.2 | 104.379 | 31.831 | 8.2 | 0.00 | 0.00 | 0.00 |
| 1932 | 104.369 | 31.788 | 6.5 | 104.341 | 31.761 | 6.5 | 104.323 | 31.778 | 8.2 | 104.352 | 31.804 | 8.2 | 0.00 | 0.00 | 0.00 |
| 1933 | 104.341 | 31.761 | 6.5 | 104.313 | 31.734 | 6.5 | 104.295 | 31.751 | 8.2 | 104.323 | 31.778 | 8.2 | 0.00 | 0.00 | 0.00 |
| 1934 | 104.313 | 31.734 | 6.5 | 104.285 | 31.707 | 6.5 | 104.267 | 31.724 | 8.2 | 104.295 | 31.751 | 8.2 | 0.00 | 0.00 | 0.00 |
| 1935 | 104.285 | 31.707 | 6.5 | 104.257 | 31.681 | 6.5 | 104.239 | 31.698 | 8.2 | 104.267 | 31.724 | 8.2 | 0.00 | 0.00 | 0.00 |
| 1936 | 104.257 | 31.681 | 6.5 | 104.229 | 31.654 | 6.5 | 104.211 | 31.671 | 8.2 | 104.239 | 31.698 | 8.2 | 0.00 | 0.00 | 0.00 |
| 1937 | 104.229 | 31.654 | 6.5 | 104.201 | 31.627 | 6.5 | 104.183 | 31.644 | 8.2 | 104.211 | 31.671 | 8.2 | 0.00 | 0.00 | 0.00 |
| 1938 | 104.201 | 31.627 | 6.5 | 104.173 | 31.601 | 6.5 | 104.155 | 31.617 | 8.2 | 104.183 | 31.644 | 8.2 | 0.00 | 0.00 | 0.00 |
| 1939 | 104.173 | 31.601 | 6.5 | 104.145 | 31.574 | 6.5 | 104.127 | 31.591 | 8.2 | 104.155 | 31.617 | 8.2 | 0.00 | 0.00 | 0.00 |
| 1940 | 104.145 | 31.574 | 6.5 | 104.117 | 31.547 | 6.5 | 104.099 | 31.564 | 8.2 | 104.127 | 31.591 | 8.2 | 0.00 | 0.00 | 0.00 |
| 1941 | 104.117 | 31.547 | 6.5 | 104.089 | 31.521 | 6.5 | 104.071 | 31.537 | 8.2 | 104.099 | 31.564 | 8.2 | 0.00 | 0.00 | 0.00 |
| 1942 | 104.089 | 31.521 | 6.5 | 104.061 | 31.494 | 6.5 | 104.043 | 31.511 | 8.2 | 104.071 | 31.537 | 8.2 | 0.09 | 0.00 | 0.09 |
| 1943 | 104.061 | 31.494 | 6.5 | 104.033 | 31.467 | 6.5 | 104.015 | 31.484 | 8.2 | 104.043 | 31.511 | 8.2 | 0.21 | 0.00 | 0.21 |
| 1944 | 104.033 | 31.467 | 6.5 | 104.005 | 31.441 | 6.5 | 103.987 | 31.457 | 8.2 | 104.015 | 31.484 | 8.2 | 0.29 | 0.00 | 0.29 |
| 1945 | 104.005 | 31.441 | 6.5 | 103.977 | 31.414 | 6.5 | 103.959 | 31.431 | 8.2 | 103.987 | 31.457 | 8.2 | 0.21 | 0.00 | 0.21 |
| 1946 | 103.977 | 31.414 | 6.5 | 103.949 | 31.387 | 6.5 | 103.931 | 31.404 | 8.2 | 103.959 | 31.431 | 8.2 | 0.07 | 0.00 | 0.07 |
| 1947 | 103.949 | 31.387 | 6.5 | 103.921 | 31.360 | 6.5 | 103.903 | 31.377 | 8.2 | 103.931 | 31.404 | 8.2 | 0.00 | 0.00 | 0.00 |
| 1948 | 103.921 | 31.360 | 6.5 | 103.893 | 31.334 | 6.5 | 103.875 | 31.351 | 8.2 | 103.903 | 31.377 | 8.2 | 0.00 | 0.00 | 0.00 |
| 1949 | 103.893 | 31.334 | 6.5 | 103.865 | 31.307 | 6.5 | 103.847 | 31.324 | 8.2 | 103.875 | 31.351 | 8.2 | 0.00 | 0.17 | 0.17 |
| 1950 | 103.865 | 31.307 | 6.5 | 103.837 | 31.280 | 6.5 | 103.819 | 31.297 | 8.2 | 103.847 | 31.324 | 8.2 | 0.00 | 0.52 | 0.52 |
| 1951 | 103.837 | 31.280 | 6.5 | 103.809 | 31.254 | 6.5 | 103.791 | 31.270 | 8.2 | 103.819 | 31.297 | 8.2 | 0.00 | 0.84 | 0.84 |
| 1952 | 103.809 | 31.254 | 6.5 | 103.781 | 31.227 | 6.5 | 103.763 | 31.244 | 8.2 | 103.791 | 31.270 | 8.2 | 0.11 | 0.78 | 0.79 |
| 1953 | 103.781 | 31.227 | 6.5 | 103.753 | 31.200 | 6.5 | 103.735 | 31.217 | 8.2 | 103.763 | 31.244 | 8.2 | 0.72 | 0.28 | 0.77 |
| 1954 | 103.753 | 31.200 | 6.5 | 103.725 | 31.174 | 6.5 | 103.707 | 31.191 | 8.2 | 103.735 | 31.217 | 8.2 | 1.41 | 0.00 | 1.41 |
| 1955 | 103.725 | 31.174 | 6.5 | 103.697 | 31.147 | 6.5 | 103.679 | 31.164 | 8.2 | 103.707 | 31.191 | 8.2 | 1.66 | 0.00 | 1.66 |
| 1956 | 103.697 | 31.147 | 6.5 | 103.668 | 31.120 | 6.5 | 103.651 | 31.137 | 8.2 | 103.679 | 31.164 | 8.2 | 0.89 | 0.05 | 0.89 |
| 1957 | 103.668 | 31.120 | 6.5 | 103.641 | 31.094 | 6.5 | 103.623 | 31.110 | 8.2 | 103.651 | 31.137 | 8.2 | 0.00 | 0.00 | 0.00 |
| 1958 | 103.641 | 31.094 | 6.5 | 103.612 | 31.067 | 6.5 | 103.595 | 31.084 | 8.2 | 103.623 | 31.110 | 8.2 | 0.00 | 0.20 | 0.20 |
| 1959 | 103.612 | 31.067 | 6.5 | 103.585 | 31.040 | 6.5 | 103.567 | 31.057 | 8.2 | 103.595 | 31.084 | 8.2 | 0.00 | 0.32 | 0.32 |
| 1960 | 103.585 | 31.040 | 6.5 | 103.556 | 31.014 | 6.5 | 103.539 | 31.030 | 8.2 | 103.567 | 31.057 | 8.2 | 0.05 | 0.43 | 0.43 |
| 1961 | 103.556 | 31.014 | 6.5 | 103.528 | 30.987 | 6.5 | 103.511 | 31.004 | 8.2 | 103.539 | 31.030 | 8.2 | 0.00 | 0.77 | 0.77 |
| 1962 | 103.528 | 30.987 | 6.5 | 103.500 | 30.960 | 6.5 | 103.483 | 30.977 | 8.2 | 103.511 | 31.004 | 8.2 | 0.00 | 0.98 | 0.98 |
| 1963 | 103.500 | 30.960 | 6.5 | 103.472 | 30.934 | 6.5 | 103.455 | 30.950 | 8.2 | 103.483 | 30.977 | 8.2 | 0.00 | 0.75 | 0.75 |
| 1964 | 103.472 | 30.934 | 6.5 | 103.444 | 30.907 | 6.5 | 103.427 | 30.924 | 8.2 | 103.455 | 30.950 | 8.2 | 0.00 | 0.37 | 0.37 |

|      |         |        |     |         |        |     |         |        |     |         |        |     |      |      |      |
|------|---------|--------|-----|---------|--------|-----|---------|--------|-----|---------|--------|-----|------|------|------|
| 1965 | 103.444 | 30.907 | 6.5 | 103.416 | 30.880 | 6.5 | 103.398 | 30.897 | 8.2 | 103.427 | 30.924 | 8.2 | 0.00 | 0.10 | 0.10 |
| 1966 | 103.416 | 30.880 | 6.5 | 103.388 | 30.854 | 6.5 | 103.371 | 30.870 | 8.2 | 103.398 | 30.897 | 8.2 | 0.00 | 0.07 | 0.07 |
| 1967 | 103.388 | 30.854 | 6.5 | 103.360 | 30.827 | 6.5 | 103.343 | 30.843 | 8.2 | 103.371 | 30.870 | 8.2 | 0.00 | 0.24 | 0.24 |
| 1968 | 103.360 | 30.827 | 6.5 | 103.332 | 30.800 | 6.5 | 103.314 | 30.817 | 8.2 | 103.343 | 30.843 | 8.2 | 0.00 | 0.64 | 0.64 |
| 1969 | 103.332 | 30.800 | 6.5 | 103.304 | 30.773 | 6.5 | 103.286 | 30.790 | 8.2 | 103.314 | 30.817 | 8.2 | 0.00 | 1.14 | 1.14 |
| 1970 | 103.304 | 30.773 | 6.5 | 103.276 | 30.747 | 6.5 | 103.258 | 30.763 | 8.2 | 103.286 | 30.790 | 8.2 | 0.00 | 1.25 | 1.25 |
| 1971 | 103.276 | 30.747 | 6.5 | 103.248 | 30.720 | 6.5 | 103.230 | 30.737 | 8.2 | 103.258 | 30.763 | 8.2 | 0.00 | 0.00 | 0.00 |
| 1972 | 104.490 | 31.936 | 8.2 | 104.462 | 31.910 | 8.2 | 104.444 | 31.926 | 9.8 | 104.472 | 31.953 | 9.8 | 0.00 | 0.00 | 0.00 |
| 1973 | 104.462 | 31.910 | 8.2 | 104.434 | 31.883 | 8.2 | 104.416 | 31.900 | 9.8 | 104.444 | 31.926 | 9.8 | 0.00 | 0.00 | 0.00 |
| 1974 | 104.434 | 31.883 | 8.2 | 104.406 | 31.856 | 8.2 | 104.388 | 31.873 | 9.8 | 104.416 | 31.900 | 9.8 | 0.00 | 0.00 | 0.00 |
| 1975 | 104.406 | 31.856 | 8.2 | 104.378 | 31.829 | 8.2 | 104.360 | 31.846 | 9.8 | 104.388 | 31.873 | 9.8 | 0.00 | 0.00 | 0.00 |
| 1976 | 104.378 | 31.829 | 8.2 | 104.350 | 31.803 | 8.2 | 104.332 | 31.820 | 9.8 | 104.360 | 31.846 | 9.8 | 0.00 | 0.00 | 0.00 |
| 1977 | 104.350 | 31.803 | 8.2 | 104.322 | 31.776 | 8.2 | 104.304 | 31.793 | 9.8 | 104.332 | 31.820 | 9.8 | 0.00 | 0.00 | 0.00 |
| 1978 | 104.322 | 31.776 | 8.2 | 104.294 | 31.749 | 8.2 | 104.276 | 31.766 | 9.8 | 104.304 | 31.793 | 9.8 | 0.00 | 0.00 | 0.00 |
| 1979 | 104.294 | 31.749 | 8.2 | 104.266 | 31.723 | 8.2 | 104.248 | 31.739 | 9.8 | 104.276 | 31.766 | 9.8 | 0.00 | 0.00 | 0.00 |
| 1980 | 104.266 | 31.723 | 8.2 | 104.237 | 31.696 | 8.2 | 104.220 | 31.713 | 9.8 | 104.248 | 31.739 | 9.8 | 0.00 | 0.00 | 0.00 |
| 1981 | 104.237 | 31.696 | 8.2 | 104.210 | 31.669 | 8.2 | 104.192 | 31.686 | 9.8 | 104.220 | 31.713 | 9.8 | 0.00 | 0.00 | 0.00 |
| 1982 | 104.210 | 31.669 | 8.2 | 104.181 | 31.643 | 8.2 | 104.164 | 31.659 | 9.8 | 104.192 | 31.686 | 9.8 | 0.00 | 0.00 | 0.00 |
| 1983 | 104.181 | 31.643 | 8.2 | 104.153 | 31.616 | 8.2 | 104.136 | 31.633 | 9.8 | 104.164 | 31.659 | 9.8 | 0.00 | 0.00 | 0.00 |
| 1984 | 104.153 | 31.616 | 8.2 | 104.125 | 31.589 | 8.2 | 104.108 | 31.606 | 9.8 | 104.136 | 31.633 | 9.8 | 0.00 | 0.00 | 0.00 |
| 1985 | 104.125 | 31.589 | 8.2 | 104.097 | 31.562 | 8.2 | 104.080 | 31.579 | 9.8 | 104.108 | 31.606 | 9.8 | 0.00 | 0.00 | 0.00 |
| 1986 | 104.097 | 31.562 | 8.2 | 104.069 | 31.536 | 8.2 | 104.052 | 31.553 | 9.8 | 104.080 | 31.579 | 9.8 | 0.00 | 0.00 | 0.00 |
| 1987 | 104.069 | 31.536 | 8.2 | 104.041 | 31.509 | 8.2 | 104.023 | 31.526 | 9.8 | 104.052 | 31.553 | 9.8 | 0.00 | 0.00 | 0.00 |
| 1988 | 104.041 | 31.509 | 8.2 | 104.013 | 31.482 | 8.2 | 103.996 | 31.499 | 9.8 | 104.023 | 31.526 | 9.8 | 0.00 | 0.00 | 0.00 |
| 1989 | 104.013 | 31.482 | 8.2 | 103.985 | 31.456 | 8.2 | 103.968 | 31.473 | 9.8 | 103.996 | 31.499 | 9.8 | 0.02 | 0.00 | 0.02 |
| 1990 | 103.985 | 31.456 | 8.2 | 103.957 | 31.429 | 8.2 | 103.939 | 31.446 | 9.8 | 103.968 | 31.473 | 9.8 | 0.00 | 0.00 | 0.00 |
| 1991 | 103.957 | 31.429 | 8.2 | 103.929 | 31.402 | 8.2 | 103.911 | 31.419 | 9.8 | 103.939 | 31.446 | 9.8 | 0.00 | 0.00 | 0.00 |
| 1992 | 103.929 | 31.402 | 8.2 | 103.901 | 31.376 | 8.2 | 103.883 | 31.392 | 9.8 | 103.911 | 31.419 | 9.8 | 0.00 | 0.00 | 0.00 |
| 1993 | 103.901 | 31.376 | 8.2 | 103.873 | 31.349 | 8.2 | 103.855 | 31.366 | 9.8 | 103.883 | 31.392 | 9.8 | 0.00 | 0.00 | 0.00 |
| 1994 | 103.873 | 31.349 | 8.2 | 103.845 | 31.322 | 8.2 | 103.827 | 31.339 | 9.8 | 103.855 | 31.366 | 9.8 | 0.00 | 0.12 | 0.12 |
| 1995 | 103.845 | 31.322 | 8.2 | 103.817 | 31.296 | 8.2 | 103.799 | 31.312 | 9.8 | 103.827 | 31.339 | 9.8 | 0.00 | 0.34 | 0.34 |
| 1996 | 103.817 | 31.296 | 8.2 | 103.789 | 31.269 | 8.2 | 103.771 | 31.286 | 9.8 | 103.799 | 31.312 | 9.8 | 0.00 | 0.50 | 0.50 |
| 1997 | 103.789 | 31.269 | 8.2 | 103.761 | 31.242 | 8.2 | 103.743 | 31.259 | 9.8 | 103.771 | 31.286 | 9.8 | 0.09 | 0.42 | 0.42 |
| 1998 | 103.761 | 31.242 | 8.2 | 103.733 | 31.216 | 8.2 | 103.715 | 31.232 | 9.8 | 103.743 | 31.259 | 9.8 | 0.56 | 0.12 | 0.57 |
| 1999 | 103.733 | 31.216 | 8.2 | 103.705 | 31.189 | 8.2 | 103.687 | 31.206 | 9.8 | 103.715 | 31.232 | 9.8 | 1.10 | 0.00 | 1.10 |
| 2000 | 103.705 | 31.189 | 8.2 | 103.677 | 31.162 | 8.2 | 103.659 | 31.179 | 9.8 | 103.687 | 31.206 | 9.8 | 1.23 | 0.00 | 1.23 |
| 2001 | 103.677 | 31.162 | 8.2 | 103.649 | 31.136 | 8.2 | 103.631 | 31.152 | 9.8 | 103.659 | 31.179 | 9.8 | 0.63 | 0.00 | 0.63 |
| 2002 | 103.649 | 31.136 | 8.2 | 103.621 | 31.109 | 8.2 | 103.603 | 31.125 | 9.8 | 103.631 | 31.152 | 9.8 | 0.00 | 0.00 | 0.00 |
| 2003 | 103.621 | 31.109 | 8.2 | 103.593 | 31.082 | 8.2 | 103.575 | 31.099 | 9.8 | 103.603 | 31.125 | 9.8 | 0.00 | 0.00 | 0.00 |
| 2004 | 103.593 | 31.082 | 8.2 | 103.565 | 31.055 | 8.2 | 103.547 | 31.072 | 9.8 | 103.575 | 31.099 | 9.8 | 0.00 | 0.00 | 0.00 |
| 2005 | 103.565 | 31.055 | 8.2 | 103.537 | 31.029 | 8.2 | 103.519 | 31.045 | 9.8 | 103.547 | 31.072 | 9.8 | 0.06 | 0.00 | 0.06 |
| 2006 | 103.537 | 31.029 | 8.2 | 103.509 | 31.002 | 8.2 | 103.491 | 31.019 | 9.8 | 103.519 | 31.045 | 9.8 | 0.00 | 0.03 | 0.03 |
| 2007 | 103.509 | 31.002 | 8.2 | 103.481 | 30.975 | 8.2 | 103.463 | 30.992 | 9.8 | 103.491 | 31.019 | 9.8 | 0.00 | 0.07 | 0.07 |
| 2008 | 103.481 | 30.975 | 8.2 | 103.453 | 30.949 | 8.2 | 103.435 | 30.965 | 9.8 | 103.463 | 30.992 | 9.8 | 0.00 | 0.03 | 0.03 |
| 2009 | 103.453 | 30.949 | 8.2 | 103.425 | 30.922 | 8.2 | 103.407 | 30.939 | 9.8 | 103.435 | 30.965 | 9.8 | 0.00 | 0.00 | 0.00 |

|      |         |        |     |         |        |     |         |        |      |         |        |      |      |      |      |
|------|---------|--------|-----|---------|--------|-----|---------|--------|------|---------|--------|------|------|------|------|
| 2010 | 103.425 | 30.922 | 8.2 | 103.397 | 30.895 | 8.2 | 103.379 | 30.912 | 9.8  | 103.407 | 30.939 | 9.8  | 0.00 | 0.00 | 0.00 |
| 2011 | 103.397 | 30.895 | 8.2 | 103.369 | 30.869 | 8.2 | 103.351 | 30.885 | 9.8  | 103.379 | 30.912 | 9.8  | 0.00 | 0.18 | 0.18 |
| 2012 | 103.369 | 30.869 | 8.2 | 103.341 | 30.842 | 8.2 | 103.323 | 30.859 | 9.8  | 103.351 | 30.885 | 9.8  | 0.00 | 0.57 | 0.57 |
| 2013 | 103.341 | 30.842 | 8.2 | 103.313 | 30.815 | 8.2 | 103.295 | 30.832 | 9.8  | 103.323 | 30.859 | 9.8  | 0.00 | 1.11 | 1.11 |
| 2014 | 103.313 | 30.815 | 8.2 | 103.285 | 30.788 | 8.2 | 103.267 | 30.805 | 9.8  | 103.295 | 30.832 | 9.8  | 0.00 | 1.63 | 1.63 |
| 2015 | 103.285 | 30.788 | 8.2 | 103.257 | 30.762 | 8.2 | 103.239 | 30.779 | 9.8  | 103.267 | 30.805 | 9.8  | 0.00 | 1.63 | 1.63 |
| 2016 | 103.257 | 30.762 | 8.2 | 103.228 | 30.735 | 8.2 | 103.211 | 30.752 | 9.8  | 103.239 | 30.779 | 9.8  | 0.00 | 0.18 | 0.18 |
| 2017 | 104.470 | 31.951 | 9.8 | 104.442 | 31.925 | 9.8 | 104.424 | 31.942 | 11.4 | 104.452 | 31.968 | 11.4 | 0.00 | 0.00 | 0.00 |
| 2018 | 104.442 | 31.925 | 9.8 | 104.414 | 31.898 | 9.8 | 104.396 | 31.915 | 11.4 | 104.424 | 31.942 | 11.4 | 0.00 | 0.00 | 0.00 |
| 2019 | 104.414 | 31.898 | 9.8 | 104.386 | 31.871 | 9.8 | 104.368 | 31.888 | 11.4 | 104.396 | 31.915 | 11.4 | 0.00 | 0.00 | 0.00 |
| 2020 | 104.386 | 31.871 | 9.8 | 104.358 | 31.845 | 9.8 | 104.340 | 31.861 | 11.4 | 104.368 | 31.888 | 11.4 | 0.00 | 0.00 | 0.00 |
| 2021 | 104.358 | 31.845 | 9.8 | 104.330 | 31.818 | 9.8 | 104.312 | 31.835 | 11.4 | 104.340 | 31.861 | 11.4 | 0.00 | 0.00 | 0.00 |
| 2022 | 104.330 | 31.818 | 9.8 | 104.302 | 31.791 | 9.8 | 104.284 | 31.808 | 11.4 | 104.312 | 31.835 | 11.4 | 0.00 | 0.08 | 0.08 |
| 2023 | 104.302 | 31.791 | 9.8 | 104.274 | 31.765 | 9.8 | 104.256 | 31.781 | 11.4 | 104.284 | 31.808 | 11.4 | 0.00 | 0.18 | 0.18 |
| 2024 | 104.274 | 31.765 | 9.8 | 104.246 | 31.738 | 9.8 | 104.228 | 31.755 | 11.4 | 104.256 | 31.781 | 11.4 | 0.00 | 0.20 | 0.20 |
| 2025 | 104.246 | 31.738 | 9.8 | 104.218 | 31.711 | 9.8 | 104.200 | 31.728 | 11.4 | 104.228 | 31.755 | 11.4 | 0.00 | 0.16 | 0.16 |
| 2026 | 104.218 | 31.711 | 9.8 | 104.190 | 31.684 | 9.8 | 104.172 | 31.701 | 11.4 | 104.200 | 31.728 | 11.4 | 0.00 | 0.09 | 0.09 |
| 2027 | 104.190 | 31.684 | 9.8 | 104.162 | 31.658 | 9.8 | 104.144 | 31.675 | 11.4 | 104.172 | 31.701 | 11.4 | 0.00 | 0.02 | 0.02 |
| 2028 | 104.162 | 31.658 | 9.8 | 104.134 | 31.631 | 9.8 | 104.116 | 31.648 | 11.4 | 104.144 | 31.675 | 11.4 | 0.00 | 0.00 | 0.00 |
| 2029 | 104.134 | 31.631 | 9.8 | 104.106 | 31.604 | 9.8 | 104.088 | 31.621 | 11.4 | 104.116 | 31.648 | 11.4 | 0.00 | 0.00 | 0.00 |
| 2030 | 104.106 | 31.604 | 9.8 | 104.078 | 31.578 | 9.8 | 104.060 | 31.595 | 11.4 | 104.088 | 31.621 | 11.4 | 0.00 | 0.00 | 0.00 |
| 2031 | 104.078 | 31.578 | 9.8 | 104.050 | 31.551 | 9.8 | 104.032 | 31.568 | 11.4 | 104.060 | 31.595 | 11.4 | 0.00 | 0.00 | 0.00 |
| 2032 | 104.050 | 31.551 | 9.8 | 104.022 | 31.524 | 9.8 | 104.004 | 31.541 | 11.4 | 104.032 | 31.568 | 11.4 | 0.00 | 0.00 | 0.00 |
| 2033 | 104.022 | 31.524 | 9.8 | 103.994 | 31.498 | 9.8 | 103.976 | 31.514 | 11.4 | 104.004 | 31.541 | 11.4 | 0.00 | 0.04 | 0.04 |
| 2034 | 103.994 | 31.498 | 9.8 | 103.966 | 31.471 | 9.8 | 103.948 | 31.488 | 11.4 | 103.976 | 31.514 | 11.4 | 0.00 | 0.11 | 0.11 |
| 2035 | 103.966 | 31.471 | 9.8 | 103.938 | 31.444 | 9.8 | 103.920 | 31.461 | 11.4 | 103.948 | 31.488 | 11.4 | 0.00 | 0.19 | 0.19 |
| 2036 | 103.938 | 31.444 | 9.8 | 103.909 | 31.418 | 9.8 | 103.892 | 31.434 | 11.4 | 103.920 | 31.461 | 11.4 | 0.00 | 0.25 | 0.25 |
| 2037 | 103.909 | 31.418 | 9.8 | 103.882 | 31.391 | 9.8 | 103.864 | 31.408 | 11.4 | 103.892 | 31.434 | 11.4 | 0.00 | 0.29 | 0.29 |
| 2038 | 103.882 | 31.391 | 9.8 | 103.853 | 31.364 | 9.8 | 103.836 | 31.381 | 11.4 | 103.864 | 31.408 | 11.4 | 0.00 | 0.33 | 0.33 |
| 2039 | 103.853 | 31.364 | 9.8 | 103.826 | 31.337 | 9.8 | 103.808 | 31.354 | 11.4 | 103.836 | 31.381 | 11.4 | 0.00 | 0.41 | 0.41 |
| 2040 | 103.826 | 31.337 | 9.8 | 103.797 | 31.311 | 9.8 | 103.780 | 31.328 | 11.4 | 103.808 | 31.354 | 11.4 | 0.00 | 0.51 | 0.51 |
| 2041 | 103.797 | 31.311 | 9.8 | 103.769 | 31.284 | 9.8 | 103.752 | 31.301 | 11.4 | 103.780 | 31.328 | 11.4 | 0.00 | 0.57 | 0.57 |
| 2042 | 103.769 | 31.284 | 9.8 | 103.741 | 31.257 | 9.8 | 103.724 | 31.274 | 11.4 | 103.752 | 31.301 | 11.4 | 0.00 | 0.50 | 0.50 |
| 2043 | 103.741 | 31.257 | 9.8 | 103.713 | 31.231 | 9.8 | 103.696 | 31.247 | 11.4 | 103.724 | 31.274 | 11.4 | 0.21 | 0.35 | 0.41 |
| 2044 | 103.713 | 31.231 | 9.8 | 103.685 | 31.204 | 9.8 | 103.668 | 31.221 | 11.4 | 103.696 | 31.247 | 11.4 | 0.47 | 0.26 | 0.54 |
| 2045 | 103.685 | 31.204 | 9.8 | 103.657 | 31.177 | 9.8 | 103.639 | 31.194 | 11.4 | 103.668 | 31.221 | 11.4 | 0.52 | 0.20 | 0.56 |
| 2046 | 103.657 | 31.177 | 9.8 | 103.629 | 31.151 | 9.8 | 103.612 | 31.167 | 11.4 | 103.639 | 31.194 | 11.4 | 0.26 | 0.11 | 0.28 |
| 2047 | 103.629 | 31.151 | 9.8 | 103.601 | 31.124 | 9.8 | 103.584 | 31.141 | 11.4 | 103.612 | 31.167 | 11.4 | 0.00 | 0.04 | 0.04 |
| 2048 | 103.601 | 31.124 | 9.8 | 103.573 | 31.097 | 9.8 | 103.555 | 31.114 | 11.4 | 103.584 | 31.141 | 11.4 | 0.00 | 0.01 | 0.01 |
| 2049 | 103.573 | 31.097 | 9.8 | 103.545 | 31.070 | 9.8 | 103.527 | 31.087 | 11.4 | 103.555 | 31.114 | 11.4 | 0.00 | 0.00 | 0.00 |
| 2050 | 103.545 | 31.070 | 9.8 | 103.517 | 31.044 | 9.8 | 103.499 | 31.061 | 11.4 | 103.527 | 31.087 | 11.4 | 0.03 | 0.00 | 0.03 |
| 2051 | 103.517 | 31.044 | 9.8 | 103.489 | 31.017 | 9.8 | 103.471 | 31.034 | 11.4 | 103.499 | 31.061 | 11.4 | 0.00 | 0.00 | 0.00 |
| 2052 | 103.489 | 31.017 | 9.8 | 103.461 | 30.991 | 9.8 | 103.443 | 31.007 | 11.4 | 103.471 | 31.034 | 11.4 | 0.00 | 0.00 | 0.00 |
| 2053 | 103.461 | 30.991 | 9.8 | 103.433 | 30.964 | 9.8 | 103.415 | 30.980 | 11.4 | 103.443 | 31.007 | 11.4 | 0.00 | 0.04 | 0.04 |
| 2054 | 103.433 | 30.964 | 9.8 | 103.405 | 30.937 | 9.8 | 103.387 | 30.954 | 11.4 | 103.415 | 30.980 | 11.4 | 0.00 | 0.14 | 0.14 |

|      |         |        |     |         |        |     |         |        |      |         |        |      |      |      |      |
|------|---------|--------|-----|---------|--------|-----|---------|--------|------|---------|--------|------|------|------|------|
| 2055 | 103.405 | 30.937 | 9.8 | 103.377 | 30.910 | 9.8 | 103.359 | 30.927 | 11.4 | 103.387 | 30.954 | 11.4 | 0.00 | 0.28 | 0.28 |
| 2056 | 103.377 | 30.910 | 9.8 | 103.349 | 30.884 | 9.8 | 103.331 | 30.900 | 11.4 | 103.359 | 30.927 | 11.4 | 0.00 | 0.52 | 0.52 |
| 2057 | 103.349 | 30.884 | 9.8 | 103.321 | 30.857 | 9.8 | 103.303 | 30.874 | 11.4 | 103.331 | 30.900 | 11.4 | 0.00 | 0.87 | 0.87 |
| 2058 | 103.321 | 30.857 | 9.8 | 103.293 | 30.830 | 9.8 | 103.275 | 30.847 | 11.4 | 103.303 | 30.874 | 11.4 | 0.00 | 1.28 | 1.28 |
| 2059 | 103.293 | 30.830 | 9.8 | 103.265 | 30.804 | 9.8 | 103.247 | 30.820 | 11.4 | 103.275 | 30.847 | 11.4 | 0.00 | 1.61 | 1.61 |
| 2060 | 103.265 | 30.804 | 9.8 | 103.237 | 30.777 | 9.8 | 103.219 | 30.794 | 11.4 | 103.247 | 30.820 | 11.4 | 0.00 | 1.55 | 1.55 |
| 2061 | 103.237 | 30.777 | 9.8 | 103.209 | 30.750 | 9.8 | 103.191 | 30.767 | 11.4 | 103.219 | 30.794 | 11.4 | 0.00 | 0.51 | 0.51 |

```

104.135 31.793 -0.0048      MB16
104.167 31.803  0.0090      MB17
104.267 31.838  0.6192      MB21
104.297 31.860  0.7696      MB22
104.313 31.855  1.2499      MB23
104.338 31.860  1.4663      MB24

```

#

#

# GPS data made by Chengdu Institute of Geology and Mineral Resources, Chengdu are from

#

# Liu, Y. *et al.* Coseismic displacement field of the 2008 M<sub>s</sub>8.0 Wenchuan earthquake in Sichuan, China (in Chinese).

# *Geological Bulletin of China*, **27**, 2086-2088 (2008).

#

# ( 12 sites )

#

| #      | Long.<br>deg | Lat.<br>deg | EW<br>cm | SN<br>cm | Sew<br>cm | Sns<br>cm | coff. | Name | Up<br>cm | Sup<br>cm | Date of Resurvey |
|--------|--------------|-------------|----------|----------|-----------|-----------|-------|------|----------|-----------|------------------|
| 105.46 | 32.02        | 32.02       | -22.85   | -3.75    | 0.42      | 0.38      | 0.001 | TJP2 | 1.98     | 1.28      | unknown          |
| 104.56 | 31.36        | 31.36       | -35.09   | 8.86     | 0.52      | 0.46      | 0.001 | JSP2 | 1.21     | 1.71      | unknown          |
| 104.50 | 32.47        | 32.47       | 33.21    | 0.58     | 1.15      | 0.78      | 0.001 | ZMH2 | -3.32    | 4.66      | unknown          |
| 103.72 | 32.40        | 32.40       | 19.59    | -5.21    | 1.36      | 0.62      | 0.001 | MJZ2 | 1.68     | 2.59      | unknown          |
| 103.48 | 32.88        | 32.88       | 7.34     | -3.60    | 0.41      | 0.37      | 0.001 | SBP1 | 1.53     | 1.48      | unknown          |
| 102.61 | 32.03        | 32.03       | 20.03    | -10.40   | 0.59      | 0.48      | 0.001 | SJS1 | 5.06     | 1.71      | unknown          |
| 101.92 | 31.79        | 31.79       | 18.16    | -5.08    | 0.69      | 0.65      | 0.001 | KEY1 | -0.95    | 2.49      | unknown          |
| 105.30 | 32.61        | 32.61       | 35.09    | 61.03    | 0.87      | 0.55      | 0.001 | CGP5 | 39.10    | 2.58      | unknown          |
| 104.07 | 30.69        | 30.69       | -18.71   | 13.03    | 0.24      | 0.23      | 0.001 | CHDU | -3.71    | 1.68      | unknown          |
| 104.40 | 30.43        | 30.43       | -8.79    | 4.51     | 0.78      | 0.75      | 0.001 | YGY5 | 2.81     | 2.27      | unknown          |
| 103.17 | 31.46        | 31.46       | 71.72    | -40.54   | 0.45      | 0.41      | 0.001 | ZGL2 | 7.59     | 1.54      | unknown          |
| 103.65 | 32.75        | 32.75       | 6.66     | -1.97    | 0.39      | 0.38      | 0.001 | HLX1 | 0.38     | 3.38      | unknown          |
